1 **DIPPER: a spatiotemporal proteomics atlas of human intervertebral discs for**  
2 **exploring ageing and degeneration dynamics**

3 Vivian Tam<sup>1,2\*</sup>, Peikai Chen<sup>1\*</sup>, Anita Yee<sup>1</sup>, Nestor Solis<sup>3</sup>, Theo Klein<sup>3,4</sup>,  
4 Mateusz Kudelko<sup>1</sup>, Rakesh Sharma<sup>5</sup>, Wilson CW Chan<sup>1,2,6</sup>, Christopher M. Overall<sup>3</sup>,  
5 Lisbet Haglund<sup>7</sup>, Pak C Sham<sup>8</sup>, Kathryn SE Cheah<sup>1</sup>, Danny Chan<sup>1,2</sup>

6 <sup>1</sup> School of Biomedical Sciences, The University of Hong Kong, Hong Kong, China;

7 <sup>2</sup> The University of Hong Kong Shenzhen of Research Institute and Innovation, Shenzhen, China;

8 <sup>3</sup> Centre for Blood Research, Faculty of Dentistry, University of British Columbia, Vancouver, Canada;

9 <sup>4</sup> Present address: Triskelion BV, Zeist, The Netherlands;

10 <sup>5</sup> Proteomics and Metabolomics Core Facility, The University of Hong Kong, Hong Kong, China;

11 <sup>6</sup> Department of Orthopaedics Surgery and Traumatology, HKU-Shenzhen Hospital, Shenzhen, China;

12 <sup>7</sup> Department of Surgery, McGill University, Montreal, Canada;

13 <sup>8</sup> Centre for PanorOmic Sciences (CPOS), The University of Hong Kong, Hong Kong, China.

14

15

16 KSEC is a senior editor at eLife. All other authors declare that they do not have any conflict of  
17 interests

18 \* These authors contributed equally to this manuscript

19

20

21

22

23 Correspondence should be addressed to:

24 Danny Chan

25 School of Biomedical Sciences

26 Faculty of Medicine

27 The University of Hong Kong

28 21 Sassoon Road, Hong Kong

29 Email: [chand@hku.hk](mailto:chand@hku.hk)

30 Tel.: +852 3917 9482

31 **Abstract**

32 The spatiotemporal proteome of the intervertebral disc (IVD) underpins its integrity and function.  
33 We present DIPPER, a deep and comprehensive IVD proteomic resource comprising 94 genome-  
34 wide profiles from 17 individuals. To begin with, protein modules defining key directional trends  
35 spanning the lateral and anteroposterior axes were derived from high-resolution spatial proteomes  
36 of intact young cadaveric lumbar IVDs. They revealed novel region-specific profiles of regulatory  
37 activities, and displayed potential paths of deconstruction in the level- and location-matched aged  
38 cadaveric discs. Machine learning methods predicted a “hydration matrisome” that connects  
39 extracellular matrix with MRI intensity. Importantly, the static proteome used as point-references  
40 can be integrated with dynamic proteome (SILAC/degradome) and transcriptome data from  
41 multiple clinical samples, enhancing robustness and clinical relevance. The data, findings and  
42 methodology, available on a web interface, will be valuable references in the field of IVD biology  
43 and proteomic analytics.

44 (142 words)

45

46

47 **Key words:** human, intervertebral discs, nucleus pulposus, annulus fibrosus, ageing,  
48 extracellular matrix, proteomics, TAILS, degradome, SILAC, transcriptomics

49

## 50 **Introduction**

51 The 23 intervertebral discs (IVDs) in the human spine provide stability, mobility and flexibility.  
52 IVD degeneration (IDD), most common in the lumbar region (Saleem et al., 2013; Teraguchi et  
53 al., 2014), is associated with a decline in function and a major cause of back pain, affecting up to  
54 80% of the world's population at some point in life (Rubin, 2007), presenting significant  
55 socioeconomic burdens. Multiple interacting factors such as genetics, influenced by ageing,  
56 mechanical and other stress factors, contribute to the pathobiology, onset, severity and progression  
57 of IDD (Munir et al., 2018).

58 IVDs are large, avascular, extracellular matrix (ECM)-rich structures comprising three  
59 compartments: a hydrated nucleus pulposus (NP) at the centre, surrounded by a tough annulus  
60 fibrosus (AF) at the periphery, and cartilaginous endplates of the adjoining vertebral bodies  
61 (Humzah and Soames, 1988). The early adolescent NP is populated with vacuolated notochordal-  
62 like cells, which are gradually replaced by small chondrocyte-like cells (Risbud et al., 2015). Blood  
63 vessels terminate at the endplates, nourishing and oxygenating the NP via diffusion, whose limited  
64 capacity mean that NP cells are constantly subject to hypoxic, metabolic and mechanical stresses  
65 (Urban et al., 2004).

66 With ageing and degeneration, there is an overall decline in cell “health” and numbers (Rodriguez  
67 et al., 2011; Sakai et al., 2012), disrupting homeostasis of the disc proteome. The ECM has key  
68 roles in biomechanical function and disc hydration. Indeed, a hallmark of IDD is reduced hydration  
69 in the NP, diminishing the disc's capacity to dissipate mechanical loads. Clinically, T-2 weighted  
70 magnetic resonance imaging (MRI) is the gold standard for assessing IDD, that uses disc hydration  
71 and structural features such as bulging or annular tears to measure severity (Pfirrmann et al., 2001;  
72 Schneiderman et al., 1987). The hydration and mechanical properties of the IVD are dictated by  
73 the ECM composition, which is produced and maintained by the IVD cells.

74 To meet specific biomechanical needs, cells in the IVD compartments synthesise different  
75 compositions of ECM proteins. Defined as the “matrisome” (Naba et al., 2012), the ECM houses  
76 the cells and facilitates their inter-communication by regulation of the availability and presentation  
77 of signalling molecules (Taha and Naba, 2019). With ageing or degeneration, the NP becomes  
78 more fibrotic and less compliant (Yee et al., 2016), ultimately affecting disc biomechanics (Newell

79 et al., 2017). Changes in matrix stiffness can have a profound impact on cell-matrix interactions  
80 and downstream transcriptional regulation, signalling activity and cell fate (Park et al., 2011).

81 The resulting alterations in the matrisome lead to vicious feedback cycles that reinforce cellular  
82 degeneration and ECM changes. Notably, many of the associated IDD genetic risk factors, such  
83 as COL9A1 (Jim et al., 2005), ASPN (Song et al., 2008), and CHST3 (Song et al., 2013), are  
84 variants in genes encoding matrisome proteins, highlighting their importance for disc function.  
85 Therefore, knowledge of the cellular and extracellular proteome and their spatial distribution in  
86 the IVD is crucial to understanding the mechanisms underlying the onset and progression of IDD  
87 (Feng et al., 2006).

88 Current knowledge of IVD biology is inferred from a limited number of transcriptomic studies on  
89 human (Minogue et al., 2010; Riester et al., 2018; Rutges et al., 2010) and animal (Veras et al.,  
90 2020) discs. Studies showed that cells in young healthy NP express markers including CD24,  
91 KRT8, KRT19 and T (Fujita et al., 2005; Minogue et al., 2010; Rutges et al., 2010), whilst NP  
92 cells in aged or degenerated discs have different and variable molecular signatures (Chen et al.,  
93 2006; Rodrigues-Pinto et al., 2016), such as genes involved in TGF $\beta$  signalling (TGFA, INHA,  
94 INHBA, BMP2/6). The healthy AF expresses genes including collagens (COL1A1 and COL12A1)  
95 (van den Akker et al., 2017), growth factors (PDGFB, FGF9, VEGFC) and signalling molecules  
96 (NOTCH and WNT) (Riester et al., 2018). Although transcriptomic data provides valuable cellular  
97 information, it does not faithfully reflect the molecular composition. Cells represent only a small  
98 fraction of the disc volume, transcriptome-proteome discordance does not enable accurate  
99 predictions of protein levels from mRNA (Fortelny et al., 2017), and the disc matrisome  
100 accumulates and remodels over time.

101 Proteomic studies on animal models of IDD, including murine (McCann et al., 2015), canine  
102 (Erwin et al., 2015), and bovine (Caldeira et al., 2017), have been reported. Nevertheless, human-  
103 animal differences in cellular phenotypes and mechanical loading physiologies mean that these  
104 findings might not translate to the human scenario. So far, human proteomic studies have  
105 compared IVDs with other cartilaginous tissues (Onnerfjord et al., 2012a); and have shown  
106 increases in fibrotic changes in ageing and degeneration (Yee et al., 2016), a role for inflammation  
107 in degenerated discs (Rajasekaran et al., 2020), the presence of haemoglobins and

108 immunoglobulins in discs with spondylolisthesis and herniation (Maseda et al., 2016), and changes  
109 in proteins related to cell adhesion and migration in IDD (Sarath Babu et al., 2016). The reported  
110 human disc proteomes were limited in the numbers of proteins identified and finer  
111 compartmentalisation within the IVD, and disc levels along the lumbar spine have yet to be  
112 studied. Nor have the proteome dynamics in term of ECM remodelling (synthesis and degradation)  
113 in young human IVDs and changes in ageing and degeneration been described.

114 In this study, we presented DIPPER (analogous to the Big Dipper which are point-reference stars  
115 for guiding nautical voyages), a comprehensive disc proteomic resource, comprising static spatial  
116 proteome, dynamic proteome and transcriptome and a methodological flow, for studying the  
117 human intervertebral disc in youth, ageing and degeneration. First, we established a high-  
118 resolution point-reference map of static spatial proteomes along the lateral and anteroposterior  
119 directions of IVDs at three lumbar levels, **contributed by a young (16M) and an aged (59M)**  
120 **cadavers with no reported scoliosis or degeneration.** We evaluated variations among the disc  
121 compartments and levels by principal component analysis (PCA), analysis of variance (ANOVA)  
122 and identification of differentially expressed proteins (DEPs). We discovered modules containing  
123 specific sets of proteins that describe the directional trends of a young IVD, and the deconstruction  
124 of these modules with ageing and degeneration. Using a LASSO regression model, we identified  
125 proteins (the hydration matrisome) predictive of tissue hydration as indicated by high-resolution  
126 MRI of the aged discs. Finally, we showed how the point-reference proteomes can be utilized, to  
127 integrate with other independent transcriptome and dynamic proteome (SILAC and degradome)  
128 datasets from additional 15 clinical disc specimens, elevating the robustness of the proteomic  
129 findings. An explorable web interface hosting the data and findings is presented, serving as a useful  
130 resource for the scientific community.

131

## 132 **Results**

### 133 ***Disc samples and their phenotypes***

134 DIPPER comprises 94 genome-wide measurements from lumbar disc components of 17  
135 individuals (Figure 1A; Table 1), with data types ranging from label-free proteomic,  
136 transcriptomic, SILAC to degradome (Lopez-Otin and Overall, 2002). High-resolution static  
137 spatial proteomes were generated from multiple intact disc segments of young trauma-induced (16  
138 M) and aged (57 M) cadaveric spines. T1- and T2-weighted MRI (3T) showed the young discs  
139 (L3/4, L4/5, L5/S1) were non-degenerated, with a Schneiderman score of 1 from T2 images  
140 (Figure 1B). The NP of young IVD were well hydrated (white) with no disc bulging, endplate  
141 changes, or observable inter-level variations (Figure 1B; Supplemental Figure S1A), consistent  
142 with healthy discs and were deemed fit to serve as a benchmarking point-reference. To investigate  
143 structural changes associated with ageing, high resolution (7T) MRI was taken for the aged discs  
144 (Figure 1C). All discs had irregular endplates, and annular tears were present (green arrowheads)  
145 adjacent to the lower endplate and extending towards the posterior region at L3/4 and L4/5 (Figure  
146 1C). The NP exhibited regional variations in hydration in both sagittal and transverse images  
147 (Figure 1C). Morphologically, the aged discs were less hydrated and the NP and AF structures less  
148 distinct, consistent with gross observations (Supplemental Figure S1A). Scoliosis was not detected  
149 in these two individuals.

150 **Information of the disc samples used in the generation of other profiling data are described in**  
151 **methods and Table 1. They are clinical samples taken from patients undergoing surgery. The disc**  
152 **levels and intactness varied, and thus are more suitable for cross-validation purposes and some are**  
153 **directly relevant to IDD.**

### 154 ***Quality data detecting large numbers of matrixome and non-matrixome proteins***

155 The intact discs from the two cadaveric spines enabled us to derive spatial proteomes for young  
156 and aged human IVDs. We subdivided each lumbar disc into 11 key regions (Figure 1D), spanning  
157 the outer-most (outer AF; OAF) to the central-most (NP) region of the disc, traversing both  
158 anteroposterior and lateral axes, adding valuable spatial information to our proteomic dataset.  
159 Since the disc is an oval shape, an inner AF (IAF) region was assigned in the lateral directions. A

160 “mixed” compartment between the NP and IAF with undefined boundary was designated as the  
161 NP/IAF in all four (anteroposterior and lateral) directions. In all, this amounted to 66 specimens  
162 with different compartments, ages, directions and levels, which then underwent LC-MS/MS  
163 profiling (Supplemental Table S1). Systematic analyses of the 66 profiles are depicted in a  
164 flowchart (Figure 1A).

165 A median of 654 proteins per profile were identified for the young samples and 829 proteins for  
166 the aged samples, with a median of 742 proteins per profile for young and aged combined. The  
167 proteome-wide distributions were on similar scales across the profiles (Supplemental Figure S1B).  
168 Of the 3,100 proteins detected in total, 418 were matrisome proteins (40.7% of all known  
169 matrisome proteins) and 2,682 non-matrisome proteins (~14% of genome-wide non-matrisome  
170 genes) (Figure 1E; Supplemental Figure S1C), and 983 were common to all four major  
171 compartments, namely the OAF, IAF, NP/IAF, and NP (Figure 1E, upper panel). A total of 1,883  
172 proteins were identified in young discs, of which 690 (36%) were common to all regions.  
173 Additionally, 45 proteins (2.4%) were unique to NP, whilst NP/IAF, IAF and OAF had 86 (4.6%),  
174 54 (2.9%) and 536 (28%) unique proteins, respectively (Figure 1E, middle panel). For the aged  
175 discs, 2,791 proteins were identified, of which 803 (28.8%) were common to all regions. NP,  
176 NP/IAF and IAF had 34 (12%), 80 (28.7%) and 44 (15%) unique proteins, respectively, with the  
177 OAF accounting for the highest proportion of 1,314 unique proteins (47%) (Figure 1E, lower  
178 panel). The aged OAF had the highest number of detected proteins with an average of 1,156,  
179 followed by the young OAF with an average of 818 (Figure 1F). The quantity and spectrum of  
180 protein categories identified suggest sufficient proteins had been extracted and the data are of high  
181 quality.

### 182 *Levels of matrisome proteins decline in all compartments of aged discs*

183 We divided the detected matrisome proteins into core matrisome (ECM proteins, encompassing  
184 collagens, proteoglycans and glycoproteins), and non-core matrisome (ECM regulators, ECM  
185 affiliated and secreted factors), according to a matrisome classification database (Naba et al., 2012)  
186 ([matrisomeproject.mit.edu](http://matrisomeproject.mit.edu)) (Figure 1F). Despite the large range of total numbers of proteins  
187 detected (419 to 1,920) across the 66 profiles (Figure 1F), all six sub-categories of the matrisome  
188 contained similar numbers of ECM proteins (Figure 1F & G; Supplemental Figure S2A). The non-



189 core matrisome proteins were significantly more abundant in aged than in young discs  
190 (Supplemental Figure S2A). On average, 19 collagens, 18 proteoglycans, 68 glycoproteins, 52  
191 ECM regulators, 22 ECM affiliated proteins, and 29 secreted factors of ECM were detected per  
192 profile. The majority of the proteins in these matrisome categories were detected in all disc  
193 compartments, and in both age groups. A summary of all the comparisons are presented in  
194 Supplemental Figure S1C-E, and the commonly expressed matrisome proteins are listed in Table  
195 2.

196 Even though there are approximately three times more non-matrisome than matrisome proteins  
197 per profile on average (Figure 1F), their expression levels in terms of label-free quantification  
198 (LFQ) values are markedly lower (Supplemental Figure S2B). Specifically, the expression levels  
199 of core-matrisome were the highest, with an average  $\log_2(\text{LFQ})$  of 30.65, followed by non-core  
200 matrisome at 28.56, and then non-matrisome at 27.28 (Supplemental Figure S2B). Within the core-  
201 matrisome, the expression was higher ( $p=6.4 \times 10^{-21}$ ) in young (median 30.74) than aged (median  
202 29.72) discs (Supplemental Figure S2C & D). This difference between young and aged discs is  
203 consistent within the sub-categories of core and non-core matrisome, with the exception of the  
204 ECM regulator category (Figure 1H). The non-core matrisome and non-matrisome, however,  
205 exhibited smaller cross-compartment and cross-age differences in terms of expression levels  
206 (Supplemental Figure S2E-H). That is, the levels of ECM proteins in each compartment of the disc  
207 declines with ageing and possibly changes in the relative composition, while the numbers of  
208 proteins detected per matrisome sub-category remain similar. This agrees with the concept that  
209 with ageing, ECM synthesis is not sufficient to counterbalance degradation, as exemplified in a  
210 proteoglycan study (Silagi et al., 2018).

### 211 *Cellular activities inferred from non-matrisome proteins*

212 Although 86.5% (2,682) of the detected proteins were non-matrisome, their expression levels were  
213 considerably lower than matrisome proteins across all sample profiles (Figure 1F). A functional  
214 categorisation according to the Human Genome Nomenclature Committee gene family annotations  
215 (Yates et al., 2017) showed many categories containing information for cellular components and  
216 activities, with the top 30 listed in Figure 1I. These included transcriptional and translational  
217 machineries, post-translational modifications, mitochondrial function, protein turnover; and



218 importantly, transcriptional factors, cell surface markers, and inflammatory proteins that can  
219 inform gene regulation, cell identity and response in the context of IVD homeostasis, ageing and  
220 degeneration.

221 These functional overviews highlighted 77 DNA-binding proteins and/or transcription factors, 83  
222 cell surface markers, and 175 inflammatory-related proteins, with their clustering data presented  
223 as heatmaps (Supplemental Figure S3). Transcription factors and cell surface markers are detected  
224 in some profiles (Supplemental Figure S3A and B). The heatmap of the inflammatory-related  
225 proteins showed that more than half of the proteins are detected in the majority of samples, with 4  
226 major clusters distinguished by age and expression levels (Supplemental S3C). For example, one  
227 of the clusters in the aged samples showed enrichment for complement and coagulation cascades  
228 (False Discovery Rate, FDR  $q=1.62\times 10^{-21}$ ) and clotting factors (FDR  $q=6.05\times 10^{-9}$ ), indicating  
229 potential infiltration of blood vessels. Lastly, there are 371 proteins involved in signalling  
230 pathways, and their detection frequency in the different compartments and heat map expression  
231 levels are illustrated in Supplemental Figure S3D.

### 232 *Histones and housekeeping genes inform cross compartment- and age-specific* 233 *variations in cellularity*

234 Cellularity within the IVD, especially the NP, decreases with age and degeneration (Rodriguez et  
235 al., 2011; Sakai et al., 2012). We assessed whether cellularity of the different compartments could  
236 be inferred from the proteomic data. Quantitation of histones can reflect the relative cellular  
237 content of tissues (Wisniewski et al., 2014). We detected 10 histones, including subunits of histone  
238 1 (HIST1H1B/C/D/E, HIST1H2BL, HIST1H3A, HIST1H4A) and histone 2 (HIST2H2AC,  
239 HIST2H2BE, HIST2H3A), with 4 subunits identified in over 60 sample profiles that are mutually  
240 co-expressed (Supplemental Figure S4A). Interestingly, histone concentrations, and thus  
241 cellularity, increased from the inner to the outer compartments of the disc, and showed a highly  
242 significant decrease in aged discs compared to young discs across all compartments (Figure 1J),  
243 (Wilcoxon  $p=5.6\times 10^{-4}$ ) (Supplemental Figure S4B).

244 GAPDH and ACTA2 are two commonly used reference proteins, involved in the metabolic  
245 process and the cytoskeletal organisation of cells, respectively. They are expected to be relatively  
246 constant between cells and are used to quantify the relative cellular content of tissues (Barber et

247 al., 2005). They were detected in all 66 profiles. GAPDH and ACTA2 amounts were significantly  
248 correlated with a Pearson correlation coefficient (PCC) of 0.794 ( $p=9.3\times 10^{-9}$ ) (Supplemental  
249 Figure S4C), and they were both significantly co-expressed with the detected histone subunits,  
250 with PCCs of 0.785 and 0.636, respectively (Figure 1K; Supplemental Figure S4D). As expected,  
251 expression of the histones, GAPDH and ACTA2 was not correlated with two core-matrisome  
252 proteins, ACAN and COL2A1 (Supplemental Figure S4E); whereas ACAN and COL2A1 were  
253 significantly co-expressed (Supplemental Figure S4F), as expected due to their related regulation  
254 of expression and tissue function. Thus, cellularity information can be obtained from proteomic  
255 information, and the histone quantification showing reduced cellularity in the aged IVD is  
256 consistent with the reported changes (Rodriguez et al., 2011; Sakai et al., 2012).

## 257 ***Phenotypic variations revealed by PCA and ANOVA***

### 258 *PCA captures the information content distinguishing age and tissue types*

259 To gain a global overview of the data, we performed PCA on a set of 507 proteins selected  
260 computationally, allowing maximal capture of valid values, while incurring minimal missing  
261 values, followed by imputations (Supplemental Figure S5; Methods). The first two principal  
262 components (PCs) explained a combined 65.5% of the variance, with 39.9% and 25.6% for the  
263 first and second PCs, respectively (Figure 2A and B). A support vector machine with polynomial  
264 kernel was trained to predict the boundaries: it showed PC1 to be most informative to predict age,  
265 with a clear demarcation between the two age groups (Figure 2A, vertical boundary), whereas PC2  
266 distinguished disc sample localities, separating the inner compartments (NP, NP/IAF and IAF)  
267 from the OAF (Figure 2A, horizontal boundary). PC3 captured only 5.0% of the variance (Figure  
268 2C & D), but it distinguished disc level, separating the lowest level (L5/S1) from the rest of the  
269 lumbar discs (L3/4 and L4/5) (Figure 2D, horizontal boundary). Samples in the upper level (L3/4  
270 and L4/5) appeared to be more divergent, with the aged disc samples deviating from the young  
271 ones (Figure 2D).

### 272 *Top correlated genes with the principal components are insightful of disc homeostasis*

273 To extract the most informative features of the PCA, we performed proteome-wide associations  
274 with each of the top three PCs, which accounted for over 70% of total variance, and presented the

275 top 100 most positively and top 100 most negatively correlated proteins for each of the PCs (Figure  
276 2E-G). As expected, the correlation coefficients in absolute values were in the order of PC1 >  
277 PC2 > PC3 (Figure 2E-G). The protein content is presented as non-matrisome proteins (grey  
278 colour) and matrisome proteins (coloured) that are sub-categorised as previously. For the  
279 negatively correlated proteins, the matrisome proteins contributed to PC1 in distinguishing young  
280 disc samples, as well as to PC2 for sample location within the disc, but less so for disc level in  
281 PC3. Further, the relative composition of the core and non-core matrisome proteins varied between  
282 the three PCs, depicting the dynamic ECM requirement and its relevance in ageing (PC1), tissue  
283 composition within the disc (PC2) and mechanical loading (PC3).

284 PC1 of young discs identified known chondrocyte markers, CLEC3A (Lau et al., 2018) and  
285 LECT1/2 (Zhu et al., 2019); hedgehog signalling proteins, HHIPL2, HHIP, and SCUBE1 (Johnson  
286 et al., 2012); and xylosyltransferase-1 (XYLT1), a key enzyme for initiating the attachment of  
287 glycosaminoglycan side chains to proteoglycan core proteins (Silagi et al., 2018) (Figure 2E). Most  
288 of the proteins that were positively correlated in PC1 were coagulation factors or coagulation  
289 related, suggesting enhanced blood infiltration in aged discs. PC2 implicated key changes in  
290 molecular signalling proteins (hedgehog, WNT and Nodal) in the differences between the inner  
291 and outer disc regions (Figure 2F). Notably, PC2 contains heat shock proteins (HSPA1B, HSPA8,  
292 HSP90AA1, HSPB1) which are more strongly expressed in the OAF than in inner disc, indicating  
293 the OAF is under stress (Takao and Iwaki, 2002). Although the correlations in PC3 were much  
294 weaker, proteins such as CILP/CILP2, DCN, and LUM were associated with lower disc level.

### 295 *ANOVA reveals the principal phenotypes for categories of ECMs*

296 To investigate how age, disc compartment, level, and direction affect the protein profiles, we  
297 carried out ANOVA for each of these phenotypic factors for the categories of matrisome and non-  
298 matrisome proteins (Supplemental Figure S5H-J). In the young discs, the dominant phenotype  
299 explaining the variances for all protein categories was disc compartment. It is crucial that each  
300 disc compartment (NP, IAF and OAF) has the appropriate protein composition to function  
301 correctly (Supplemental Figure S5I). This also fits the understanding that young healthy discs are  
302 axially symmetric and do not vary across disc levels. In aged discs, compartment is still relevant  
303 for non-matrisome proteins and collagen, but disc level and directions become influential for other

304 protein categories, which is consistent with variations in mechanical loading occurring in the discs  
305 with ageing and degeneration (Supplemental Figure S5J). In the combined (young and aged) disc  
306 samples, age was the dominant phenotype across major matrisome categories, while compartment  
307 best explained the variance in non-matrisome, reflecting the expected changes in cellular (non-  
308 matrisome) and structural (matrisome) functions of the discs (Supplemental Figure S5H). This  
309 guided us to analyse the young and aged profiles separately, before performing cross-age  
310 comparisons.

### 311 ***The high-resolution spatial proteome of young and healthy discs***

312 PCA of the 33 young profiles showed a distinctive separation of the OAF from the inner disc  
313 regions on PC1 (upper panel of Figure 3A). In PC2, the lower level L5/S1 could generally be  
314 distinguished from the upper lumbar levels (lower panel of Figure 3A). The detected proteome of  
315 the young discs (Figure 3B) accounts for 9.2% of the human proteome (or 1,883 out of the 20,368  
316 on UniProt). We performed multiple levels of pairwise comparisons (summarised in Supplemental  
317 Figure S6A) to detect proteins associated with individual phenotypes, using three approaches (see  
318 Methods): statistical tests; proteins detected in one group only; or proteins using a fold-change  
319 threshold. We detected a set of 671 DEPs (Supplemental Table S2) (termed the ‘variable set’),  
320 containing both matrisome and non-matrisome proteins (Figure 3D), and visualised in a heatmap  
321 (Supplemental Figure S7), with identification of four modules (Y1-Y4).

### 322 ***Expression modules show lateral and anteroposterior trends***

323 To investigate how the modules are associated with disc components, we compared their protein  
324 expression profiles along the lateral and anteroposterior axes. The original  $\log_2(\text{LFQ})$  values were  
325 transformed to z-scores to be on the same scale. Proteins of the respective modules were  
326 superimposed on the same charts, disc levels combined or separated (Figure 3E-H; Supplemental  
327 Figure S8). Module Y1 is functionally relevant to NP, containing previously reported NP and novel  
328 markers KRT19, CD109, KRT8 and CHRDL2 (Anderson et al., 2002), SCUBE1 (Johnson  
329 et al., 2012) and CLEC3B. Proteins levels in Y1 are lower on one side of the OAF, increases  
330 towards the central NP, before declining towards the opposing side, forming a concave pattern in  
331 both lateral and anteroposterior directions, with a shoulder drop occurring between IAF and OAF  
332 (Figure 3E).

333 Module Y2 was enriched in proteins for ECM organisation (FDR  $q=8.8\times 10^{-24}$ ); Y3 was enriched  
334 for proteins involved in smooth muscle contraction processes (FDR  $q=8.96\times 10^{-19}$ ); and Y4 was  
335 enriched for proteins of the innate immune system (FDR  $q=2.93\times 10^{-20}$ ). Interestingly, these  
336 modules all showed a tendency for convex patterns with upward expression toward the OAF  
337 regions, in both lateral and anteroposterior directions, in all levels, combined or separated (Figure  
338 3F-H; Supplemental S8B-D). The higher proportions of ECM, muscle contraction and immune  
339 system proteins in the OAF are consistent with the contractile function of the AF (Nakai et al.,  
340 2016), and with the NP being avascular and “immune-privileged” in a young homeostatic  
341 environment (Sun et al., 2020).

#### 342 *Inner disc regions are characterised with NP markers*

343 The most distinctive pattern on the PCA is the separation of the OAF from the inner disc, with 99  
344 proteins expressed higher in the OAF and 55 expressed higher in the inner disc (Figure 3I,J).  
345 Notably, OAF and inner disc contained different types of ECM proteins. The inner disc regions  
346 were enriched in collagens (COL3A1, COL5A1, COL5A2, and COL11A2), matrillin (MATN3),  
347 and proteins associated with ECM synthesis (PCOLCE) and matrix remodelling (MXRA5). We  
348 also identified in the inner disc previously reported NP markers (KRT19, KRT8) (Risbud et al.,  
349 2015), in addition to inhibitors of WNT (FRZB, DKK3) and BMP (CHRD, CHRDL2) signalling  
350 (Figure 3I,J). Of note, FRZB and CHRDL2 were recently shown to have potential protective  
351 characteristics in osteoarthritis (Ji et al., 2019). The TGF $\beta$  pathway appears to be suppressed in the  
352 inner disc where antagonist CD109 (Bizet et al., 2011; Li et al., 2016) is highly expressed, and the  
353 TGF $\beta$  activity indicator TGFBI is expressed higher in the OAF than in the inner disc.

#### 354 *The OAF signature is enriched with proteins characteristic of tendon and ligament*

355 The OAF is enriched with various collagens (COL1A1, COL6A1/2/3, COL12A1 and COL14A1),  
356 basement membrane (BM) proteins (LAMA4, LAMB2 and LAMC1), small leucine-rich  
357 proteoglycans (SLRP) (BGN, DCN, FMOD, OGN, PRELP), and BM-anchoring protein (PRELP)  
358 (Figure 3I,J). Tendon-related markers such as thrombospondins (THBS1/2/4) (Subramanian and  
359 Schilling, 2014) and cartilage intermediate layer proteins (CILP/CILP2) are also expressed higher  
360 in the OAF. Tenomodulin (TNMD) was exclusively expressed in 9 of the 12 young OAF profiles,  
361 and not in any other compartments (Supplemental Table S2). This fits a current understanding of

362 the AF as a tendon/ligament-like structure (Nakamichi et al., 2018). In addition, the OAF was  
363 enriched in actin-myosin (Figure 3I), suggesting a role of contractile function in the OAF, and in  
364 heat shock proteins (HSPA1B, HSPA8, HSPB1, HSP90B1, HSP90AA1), suggesting a stress  
365 response to fluctuating mechanical loads.

### 366 *Spatial proteome enables clear distinction between IAF and OAF*

367 We sought to identify transitions in proteomic signatures between adjacent compartments. The NP  
368 and NP/IAF protein profiles were highly similar (Supplemental Figure 6B). Likewise, NP/IAF and  
369 IAF showed few DEPs, except COMP which was expressed higher in IAF (Supplemental Figure  
370 6C). OAF and NP (Supplemental Figure 6R), and OAF and NP/IAF (Supplemental Figure 6O)  
371 showed overlapping DEPs, consistent with NP and NP/IAF having highly similar protein profiles,  
372 despite some differences in the anteroposterior direction (Supplemental Figure 6P & Q). The  
373 clearest boundary within the IVD, between IAF and OAF, was marked by a set of DEPs, of which  
374 COL5A1, SERPINA5, MXRA5 were enriched in the IAF, whereas LAMB2, THBS1, CTSD  
375 typified the OAF (Supplemental Figure 6D). These findings agreed with the modular patterns  
376 (Figure 3E-H).

### 377 *The constant set represents the baseline proteome among structures within the young* 378 *disc*

379 Of the 1,880 proteins detected, 1204 proteins were not found to vary with respect to the phenotypic  
380 factors. The majority of these proteins were detected in few profiles (Figure 3B) and were not used  
381 in the comparisons. We set a cutoff for a detection in  $>1/2$  of the profiles to prioritise a set of 245  
382 proteins, hereby referred to as the ‘constant set’ (Figure 3C). Both the variable and the constant  
383 sets contained high proportions of ECM proteins (Figure 3D). Amongst the proteins in the constant  
384 set that were detected in all 33 young profiles were known protein markers defining a young NP  
385 or disc, including COL2A1, ACAN and A2M (Risbud et al., 2015). Other key proteins in the  
386 constant set included CHAD, HAPLN1, VCAN, HTRA1, CRTAC1, and CLU. Collectively, these  
387 proteins showed the common characteristics shared by compartments of young discs, and they,  
388 alongside the variable set, form the architectural landscape of the young disc.



## 389 ***Diverse changes in the spatial proteome with ageing***

### 390 *Fewer inner-outer differences but greater variation between levels in aged discs*

391 PCA was used to identify compartmental, directional and level patterns for the aged discs (Figure  
392 4A). Albeit less clear than for the young discs (Figure 3A), the OAF could be distinguished from  
393 the inner disc regions on PC1, explaining 46.7% of the total variance (Figure 4A). PC2 showed a  
394 more distinct separation of signatures from lumbar disc levels L5/S1 to the upper disc levels  
395 (L4/L5 and L3/4), accounting for 21.8% of the total variance (Figure 4A).

### 396 *Loss of the NP signature from inner disc regions*

397 As with the young discs, we performed a series of comparative analyses (Figure 4C; Supplemental  
398 Figure S9 A-H; Supplemental Table S3). Detection of DEPs between the OAF and the inner disc  
399 (Figure 4B), showed that 100 proteins were expressed higher in the OAF, similar to young discs  
400 (Figure 3C). However, in the inner regions, only 9 proteins were significantly expressed higher, in  
401 marked contrast to the situation in young discs. Fifty-five of the 100 DEPs in the OAF region  
402 overlapped in the same region in the young discs, but only 3 of the 9 DEPs in the inner region were  
403 identified in the young disc; indicating changes in both regions but more dramatic in the inner  
404 region. This suggests that ageing and associated changes may have initiated at the centre of the  
405 disc. The typical NP markers (KRT8/19, CD109, CHRD, CHRDL2) were not detectable as DEPs  
406 in the aged disc; but CHI3L2, A2M and SERPING1 (Figure 4B), which have known roles in tissue  
407 fibrosis and wound healing (Lee et al., 2011; Naveau et al., 1994; Wang et al., 2019a), were  
408 detected uniquely in the aged discs.

### 409 *Gradual modification of ECM composition and cellular responses in the outer AF*

410 A comparative analysis of the protein profiles indicated that the aged OAF retained 55% of the  
411 proteins of a young OAF. These changes are primarily reflected in the class of SLRPs (BGN, DCN,  
412 FMOD, OGN, and PRELP), and glycoproteins such as CILP, CILP2, COMP, FGA/B, and FGG.  
413 From a cellular perspective, 45 proteins enriched in the aged OAF could be classified under  
414 'responses to stress' (FDR  $q=1.86 \times 10^{-7}$ ; contributed by CAT, PRDX6, HSP90AB1, EEF1A1,  
415 TUBB4B, P4HB, PRDX1, HSPA5, CRYAB, HIST1H1C), suggesting OAF cells are responding  
416 to a changing environment such as mechanical loading and other stress factors.



#### 417 *Convergence of the inner disc and outer regions in aged discs*

418 To map the relative changes between inner and outer regions of the aged discs, we performed a  
419 systematic comparison between compartments (Supplemental Figure S9 A-D). The most  
420 significant observation was a weakening of the distinction between IAF and OAF that was seen in  
421 young discs, with only 17 DEPs expressed higher in the OAF of the aged disc (Supplemental  
422 Figure S9C). More differences were seen when we included the NP in the comparison with OAF  
423 (Supplemental Figure S9D), indicating some differences remain between inner and outer regions  
424 of the aged discs. While the protein profiles of the NP and IAF were similar, with no detectable  
425 DEPs (Supplemental Figure S9A & B), their compositions shared more resemblance with the  
426 OAF. These progressive changes of the protein profiles and DEPs between inner and outer  
427 compartments suggest the protein composition of the inner disc compartments becomes more  
428 similar to the OAF with ageing, with the greatest changes in the inner regions. This further supports  
429 a change initiating from the inner region of the discs with ageing.

#### 430 *Changes in young module patterns reflect convergence of disc compartments*

431 We investigated protein composition in the young disc modules (Y1-Y4) across the lateral and  
432 anteroposterior axes (Figure 4C-F). For module Y1 that consists of proteins defining the NP  
433 region, the distinctive concave pattern has flattened along both axes, but more so for the  
434 anteroposterior direction where the clear interface between IAF and OAF was lost (Figure 4C;  
435 Supplemental Figure S9I). Similarly for modules Y2 and Y3, which consist of proteins defining  
436 the AF region, the trends between inner and outer regions of the disc have changed such that the  
437 patterns become more convex, with a change that is a continuum from inner to outer regions  
438 (Figure 4D,E; Supplemental Figure S9J,K). These changes in modules Y1-3 in the aged disc  
439 further illustrate the convergence of the inner and outer regions, with the NP/IAF becoming more  
440 OAF-like. For Y4, the patterns along the lateral and anteroposterior axes were completely  
441 disrupted (Figure 4F; Supplemental Figure S9J). **As Y4 contains proteins involved in vascularity  
442 and inflammatory processes (Supplemental Table 5), these changes indicate disruption of cellular  
443 homeostasis in the NP.**

444 *Disc level variations reflect spatial and temporal progression of disc changes*

445 The protein profiles of the aged disc levels, consistent with the PCA findings, showed similarity  
446 between L3/4 and L4/5 (Supplemental Figure S9E), but, in contrast to young discs, differences  
447 between L5/S1 and L4/5 (Supplemental Figure S9F), and more marked differences between L5/S1  
448 and L3/4 (Supplemental Figure S9G,H). Overall, the findings from PCA, protein profiles (Figure  
449 2B-D) and MRI (Figure 1C) agree. As compared to young discs, the more divergent differences  
450 across the aged disc levels potentially reflect progressive transmission from the initiating disc to  
451 the adjacent discs with ageing. To further investigate the aetiologies underlying IDD, cross-age  
452 comparisons are needed.

453 ***Aetiological insights uncovered by young/aged comparisons***

454 Next, we performed extensive pair-wise comparisons between the young and aged samples under  
455 a defined scheme (Supplemental Figure S10A; Supplemental Table S4). First, we compared all 33  
456 young samples with all 33 aged samples, which identified 169 DEPs with 104 expressed higher in  
457 the young and 65 expressed higher in the aged discs (Figure 5A). A simple GO term analysis  
458 showed that the most important biological property for a young disc is structural integrity, which  
459 is lost in aged discs (Figure 5B; Supplemental Table S5). The protein classes most enriched in the  
460 young discs were related to cartilage synthesis, chondrocyte development, and ECM organisation  
461 (Figure 5B). The major changes in the aged discs relative to young ones, were proteins involved  
462 in cellular responses to an ageing environment, including inflammatory and cellular stress signals,  
463 progressive remodelling of disc compartments, and diminishing metabolic activities (Figure 5C;  
464 Supplemental Table S5).

465 *Inner disc regions present with most changes in ageing*

466 For young versus old discs, we compared DEPs of the whole disc (Figure 5A) with those from the  
467 inner regions (Figure 5D) and OAF (Figure 5E) only. Seventy-five percent (78/104) of the down-  
468 regulated DEPs (Figure 5F) were attributed to the inner regions, and only 17% (18/104) were  
469 attributed to the OAF (Figure 5F). Similarly, 65% (42/65) of the up-regulated DEPs were solely  
470 contributed by inner disc regions, and only 18.4% (12/65) by the OAF. Only 5 DEPs were higher

471 in the OAF, while 49 were uniquely up-regulated in the inner discs (Figure 5G). The key biological  
472 processes in each of the compartments are highlighted in Figure 5F & G.

### 473 *The changing biological processes in the aged discs*

474 Expression of known NP markers was reduced in aged discs, especially proteins involved in the  
475 ECM and its remodelling, where many of the core matrisome proteins essential for the structural  
476 function of the NP were less abundant or absent. While this is consistent with previous  
477 observations (Feng et al., 2006), of interest was the presence of a set of protein changes that were  
478 also seen in the OAF, which was also rich in ECM and matrix remodelling proteins (HTRA1,  
479 SERPINA1, SERPINA3, SERPINC1, SERPINF1, and TIMP3) and proteins involved in fibrotic  
480 events (FN1, POSTN, APOA1, APOB), suggesting these changes are occurring in the aging IVDs  
481 (Figure 5 F,G).

482 Proteins associated with cellular stress are decreased in the aged inner disc, with functions ranging  
483 from molecular chaperones needed for protein folding (HSPB1, HSPA1B and HSPA9) to  
484 modulation of oxidative stress (SOD1) (Figure 5F). SOD1 has been shown to become less  
485 abundant in the aged IVD (Hou et al., 2014) and in osteoarthritis (Scott et al., 2010). HSPB1 is  
486 cytoprotective and a deficiency is associated with inflammation reported in degenerative discs  
487 (Wuertz et al., 2012). We found an increased concentration of clusterin (CLU) (Figure 5G), an  
488 extracellular chaperone that aids the solubilisation of misfolded protein complexes by binding  
489 directly and preventing protein aggregation (Trogakos, 2013; Wyatt et al., 2009), and also has a  
490 role in suppressing fibrosis (Peix et al., 2018).

491 Inhibitors of WNT (DKK3 and FRZB), and antagonists of BMP/TGF $\beta$  (CD109, CHRDL2, DCN  
492 FMOD, INHBA and THBS1) signalling were decreased or absent in the aged inner region (Figure  
493 5F,G), consistent with the reported up-regulation of these pathways in IDD (Hiyama et al., 2010)  
494 and its closely related condition osteoarthritis (Leijten et al., 2013). Targets of hedgehog signalling  
495 (HHIPL2 and SCUBE1) were also reduced (Figure 5F), consistent with SHH's key roles in IVD  
496 development and maintenance (Rajesh and Dahia, 2018). TGF $\beta$  signalling is a well-known  
497 pathway associated with fibrotic outcomes. WNT is known to induce chondrocyte hypertrophy  
498 (Dong et al., 2006), that can be enhanced by a reduction in S100A1 (Figure 5F), a known inhibitor  
499 of chondrocyte hypertrophy (Saito et al., 2007).

500 To gain an overview of the disc compartment variations between young and aged discs, we  
501 followed the same strategy as in Supplemental Figure S7 to aggregate three categories of DEPs in  
502 all 23 comparisons (Supplemental Figure S10A) and created a heatmap from the resulting 719  
503 DEPs. This allowed us to identify 6 major protein modules (Figure 5H). A striking feature is  
504 module 6 (M6), which is enriched for proteins involved in the complement pathway (GSEA  
505 Hallmark FDR  $q=4.9\times 10^{-14}$ ) and angiogenesis ( $q=2.3\times 10^{-3}$ ). This module contains proteins that  
506 are all highly expressed in the inner regions of the aged disc, suggesting the presence of blood. M6  
507 also contains the macrophage marker CD14, which supports this notion.

508 We visualised the relationship between the young (Y1-4) and young/aged (M1-6) modules using  
509 an alluvial chart (Figure 5I). Y1 corresponds primarily to M1b that is enriched with fibrosis,  
510 angiogenesis, apoptosis and EMT (epithelial to mesenchymal transition) proteins. Y2 seems to  
511 have been deconstructed into three M modules ( $M2b > M3 > M4$ ). M2b and M3 contain proteins  
512 linked to heterogeneous functions, while proteins in M4 are associated with myogenesis and  
513 cellular metabolism, but also linked to fibrosis and angiogenesis. Y3 primarily links to M2a with  
514 a strong link to myogenesis, and mildly connects with M3 and M4. Y4 has the strongest connection  
515 with M6a, which is linked to coagulation. Both the variable and the constant sets of the young disc  
516 were also changed in ageing. In the constant set, there is a higher tendency for a decrease in ECM-  
517 related proteins, and an increase in blood and immune related proteins with ageing, that may reflect  
518 an erosion of the foundational proteome, and infiltration of immune cells (Figure S10L).

519 In all, the IVD proteome showed that with ageing, activities of the SHH pathways were decreased,  
520 while those of the WNT and BMP/TGF $\beta$  pathways, EMT, angiogenesis, fibrosis, cellular stresses  
521 and chondrocyte hypertrophy-like events were increased.

### 522 ***Concordant changes between the transcriptome and proteome of disc cells***

523 The proteome reflects both current and past transcriptional activities. To investigate upstream  
524 cellular and regulatory activities, we obtained transcriptome profiles from two IVD compartments  
525 (NP and AF) and two sample states (young, scoliotic but non-degenerated, YND; aged individuals  
526 with clinically diagnosed IDD, AGD) (Table 1). The transcriptome profiles of YND and AGD are  
527 similar to the young and aged disc proteome samples, respectively. After normalisation  
528 (Supplemental Figure S11A) and hierarchical clustering, we found patterns reflecting relationships

529 among IVD compartments and ages/states (Supplemental Figure S11B-D). PCA of the  
530 transcriptome profiles showed that PC1 captured age/state variations (Figure 6A) and PC2  
531 captured the compartment (AF or NP) differences, with a high degree of similarity to the proteomic  
532 PCA that explained 65.0% of all data variance (Figure 2A).

### 533 *Transcriptome shows AF-like characteristics of the aged/degenerated NP*

534 We compared the transcriptome profiles of different compartments and age/state-groups  
535 (Supplemental Figure S11E-H). We detected 88 DEGs (differentially expressed genes; Methods)  
536 between young AF and young NP samples (Supplemental Figure S11E); 39 were more abundant  
537 in young NP (including known NP markers *CD24*, *KRT19*) and 49 were more abundant in young  
538 AF, including the AF markers, *COL1A1* and *THBS1*. In the AGD samples, 11 genes differed  
539 between AF and NP (Supplemental Figure S11F), comparable to the proteome profiles (Figure  
540 4C). Between the YND and AGD AF, there were 45 DEGs, with *COL1A1* and *MMP1* more  
541 abundant in YND and *COL10A1*, WNT signalling (*WIF1*, *WNT16*), inflammatory (*TNFAIP6*,  
542 *CXCL14*, *IL11*), and fibrosis-associated (*FNI*, *CXCL14*) genes more abundant in AGD  
543 (Supplemental Figure S11G). The greatest difference was between YND and AGD NP, with 216  
544 DEGs (Supplemental Figure S11H), with a marked loss of NP markers (*KRT19*, *CD24*), and gain  
545 of AF (*THBS1*, *DCN*), proteolytic (*ADAMTS5*), and EMT (*COL1A1*, *COL3A1*, *PDPN*, *NT5E*,  
546 *LTBP1*) markers with age. Again, consistent with the proteomic findings, the most marked changes  
547 are in the NP, with the transcriptome profiles becoming AF-like.

### 548 *Concordance between transcriptome and proteome profiles*

549 We partitioned the DEGs between the YND and AGD into DEGs for individual compartments  
550 (Figure 6B). The transcriptomic (Figure 6B) Venn diagram was very similar to the proteomic one  
551 (Figure 5F-G). For example, WNT/TGF $\beta$  antagonists and ECM genes were all down-regulated  
552 with ageing/degeneration, while genes associated with stress and ECM remodelling were more  
553 common. When we directly compared the transcriptomic DEGs and proteomic DEPs across  
554 age/states and compartments (Figure 6C-F), we observed strong concordance between the two  
555 types of datasets for a series of markers. In the young discs, concordant markers included *KRT19*  
556 and *KRT8*, *CHRD2*, *FRZB*, and *DKK3* in the NP, and *COL1A1*, *SERPINF1*, *COL14A1*, and  
557 *THBS4* in the AF (Figure 6C). In the AGD discs, concordant markers included *CHI3L2*, *A2M* and

558 *ANGPTL4* in the NP and *MYH9*, *HSP90AB1*, *HBA1*, and *ACTA2* in the AF (Figure 6D). A high  
559 degree of concordance was also observed when we compared across age/states for the AF (Figure  
560 6E) and NP (Figure 6F).

561 Despite the transcriptomic samples having diagnoses (scoliosis for YND and IDD for AGD),  
562 whereas the proteome samples were cadaver samples with no reported diagnosis of IDD, the  
563 changes detected in the transcriptome profiles substantially support the proteomic findings. A  
564 surprising indication from the transcriptome was the increased levels of *COL10A1* (Lu et al.,  
565 2014), *BMP2* (Grimsrud et al., 2001), *IBSP*, defensin beta-1 (*DEFB1*), *ADAMTS5*, pro-  
566 inflammatory (*TNFAIP6*, *CXCL*) and proliferation (*CCND1*, *IGFBP*) genes in the AGD NP  
567 (Supplemental Figure S11E-H), reaffirming the involvement of hypertrophic-like events (Melas  
568 et al., 2014) in the aged and degenerated NP.

569 The genome-wide transcriptomic data included over 20 times more genes per profile than the  
570 proteomic data, providing additional biological information about the disc, particularly low  
571 abundance proteins, such as transcription factors and surface markers. For example, additional  
572 WNT antagonists were *WIF1* (Wnt inhibitory factor) and *GREM1* (Figure 6B) (Leijten et al.,  
573 2013). Comparing the YND NP against YND AF or AGD NP (Supplemental Figure S11E,H), we  
574 identified higher expression of three transcription factors, *T* (brachyury), *HOPX* (homeodomain-  
575 only protein homeobox), and *ZNF385B* in the YND NP. Brachyury is a well-known marker for  
576 the NP (Risbud et al., 2015), and *HOPX* is differentially expressed in mouse NP as compared to  
577 AF (Veras et al., 2020), and expressed in mouse notochordal NP cells (Lam, 2013). Overall,  
578 transcriptomic data confirmed the proteomic findings and revealed additional markers.

### 579 ***Changes in the active proteome in the ageing IVD***

580 The proteomic data up to this point is a static form of measurement (static proteome) and represents  
581 the accumulation and turnover of all proteins up to the time of harvest. The transcriptome indicates  
582 genes that are actively transcribed, but does not necessarily correlate to translation or protein  
583 turnover. Thus, we studied changes in the IVD proteome (dynamic proteome) that would reflect  
584 newly synthesised proteins and proteins cleaved by proteases (degradome), and how they relate to  
585 the static proteomic and transcriptomic findings reported above.



## 586 *Aged or degenerated discs synthesise fewer proteins*

587 We performed *ex vivo* labelling of newly synthesised proteins using the SILAC protocol (Ong et  
588 al., 2002) (Figure 7A; Methods) on AF and NP samples from 4 YND individuals and one AGD  
589 individual (Table 1). In the SILAC profiles, light isotope-containing signals correspond to the pre-  
590 existing unlabelled proteome, and heavy isotope-containing signals to newly synthesised proteins  
591 (Figure 7B). The ECM compositions in the light isotope-containing profiles (Figure 7B, middle  
592 panel) are similar to the static proteome samples of the corresponding age groups described above  
593 (Figure 1F). Although for NP\_YND152, the numbers of identified proteins in the heavy profiles  
594 are considerably less than NP\_YND151 due to a technical issue during sample preparation, it is  
595 overall still more similar to NP\_YND152 than to other samples (Supplemental Figure S12B),  
596 indicating that its biological information is still representative of a young NP and the respective  
597 AF samples are similar. In contrast, the heavy isotope-containing profiles contained fewer proteins  
598 in the AGD than in the YND samples (Figure 7B, left panel) and showed variable heavy to light  
599 ratio profiles (Figure 7B, right panel).

600 To facilitate comparisons, we averaged the abundance of the proteins detected in the NP or AF for  
601 which we had more than one sample, then ranked the abundance of the heavy isotope-containing  
602 (Figure 7C) and light isotope-containing (Figure 7D) proteins. The number of proteins newly  
603 synthesised in the AGD samples was about half that in the YND samples (Figure 7C). This is  
604 unlikely to be a technical artefact as the total number of light isotope-containing proteins detected  
605 in the AGD samples is comparable to the YND, in both AF and NP (Figure 7D), and the difference  
606 is again well illustrated in the heavy to light ratios (Figure 7E).

607 Reduced synthesis of non-matrisome proteins was found for the AGD samples (GAPDH as a  
608 reference point (dotted red lines) (Figures 7C & D; Figure 7C & E, grey portions). Of the 68 high  
609 abundant non-matrisome proteins in the YND NP compartment that were not present in the AGD  
610 NP, 28 are ribosomal proteins (Supplemental Figure S12C), suggesting reduced translational  
611 activities. This agrees with our earlier findings of cellularity, as represented by histones, in the  
612 static proteome (Figure 1J, K).

613 Changes in protein synthesis in response to the cell microenvironment affects the architecture of  
614 the disc proteome. To understand how the cells may contribute and respond to the accumulated



615 matrisome in the young and aged disc, we compared the newly synthesised matrisome proteins of  
616 AGD and YND samples rearranged in order of abundance (Figure 7E). More matrisome proteins  
617 were synthesised in YND samples across all classes. In YND AF, collagens were synthesised in  
618 higher proportions than in AGD AF with the exception of fibril-associated COL12A1 (Figure 7E,  
619 top panel). Similarly, higher proportions in YND AF were observed for proteoglycans (except  
620 FMOD), glycoproteins (except TNC, FBN1, FGG and FGA), ECM affiliated proteins (except  
621 C1QB), ECM regulators (except SERPINF2, SERPIND1, A2M, ITIH2, PLG), and secreted  
622 factors (except ANGPTL2). Notably, regulators that were exclusively synthesised in young AF  
623 are involved in collagen synthesis (P4HA1/2, LOXL2, LOX, PLOD1/2) and matrix turnover  
624 (MMP3), with enrichment of protease HTRA1 and protease inhibitors TIMP3 and ITIH in YND  
625 AF compared to AGD AF.

626 In AGD NP, overall collagen synthesis was less than in YND NP (Figure 7E, lower panel);  
627 however, there was more synthesis of COL6A1/2/3 and COL12A1. Furthermore, AGD NP  
628 synthesised more LUM, FMOD, DCN, PRG4, and PRELP proteoglycans than YND NP. Notably,  
629 there was less synthesis of ECM-affiliated proteins (except C1QC and SEMA3A) and regulators  
630 – particularly those involved in collagen synthesis (P4HA1/2, LOXL2, LOX) – but an increase in  
631 protease inhibitors. A number of newly synthesised proteins in AGD NP were similarly  
632 represented in the transcriptome data, including POSTN, ITIH2, SERPINC1, IGFBP3, and PLG.  
633 Some genes were simultaneously underrepresented in the AGD NP transcriptome and newly  
634 synthesised proteins, including hypertrophy inhibitor GREM1 (Leijten et al., 2013).

### 635 *Proteome of aged or degenerated discs is at a higher degradative state*

636 The degradome reflects protein turnover by identifying cleaved proteins in a sample (Lopez-Otin  
637 and Overall, 2002). When combined with relative quantification of proteins through the use of  
638 isotopic and isobaric tagging and enrichment for cleaved neo amine (N)-termini of proteins before  
639 labelled samples are quantified by mass-spectrometry, degradomics is a powerful approach to  
640 identify the actual status of protein cleavage *in vivo*.

641 We employed the well-validated and sensitive terminal amine isotopic labelling of substrates  
642 (TAILS) method (Kleifeld et al., 2010; Rauniyar and Yates, 2014) to analyse and compare 6 discs  
643 from 6 individuals (2 young and non-degenerated, YND; and 4 aged and/or degenerated, AGD)

644 (Table 1) (Figure 7F) (Kleifeld et al., 2010; Rauniyar and Yates, 2014) using the 6-plex tandem  
645 mass tag (TMT)-TAILS (labelling 6 independent samples and analysed together on the mass  
646 spectrometer) (Figure 7F). Whereas shotgun proteomics is intended to identify the proteome  
647 components, N-terminome data is designed to identify the exact cleavage site in proteins that also  
648 evidence stable cleavage products *in vivo*.

649 Here, TAILS identified 123 and 84 cleaved proteins in the AF and NP disc samples, respectively.  
650 Performing hierarchical clustering on the data we found that the two YND samples (136 and 141;  
651 Table 1) tend to cluster together in both AF and NP (Figure 7G,H; Supplemental Figure S13A,B).  
652 Interestingly, the trauma sample AGD143 (53yr male), who has no known IDD diagnosis, tend to  
653 cluster with other clinically diagnosed AGD samples, in both AF and NP. This might be because  
654 AGD143 has unreported degeneration or ageing is a dominant factor in degradome signals.

655 We identified two protein/peptide modules in the AF (Figure 7G), corresponding to more  
656 degradation/cleaving in YND AF (magenta) and AGD AF (blue), respectively. There are only 13  
657 unique proteins for proteins/peptides more degraded in the YND AF, the most common of which  
658 is COL1A1/2, followed by COL2A1. In comparison, the module corresponding to more  
659 degradation in AGD AF recorded 24 unique proteins, 7 (CILP, CILP2, COL1A1, COMP, HBA1,  
660 HBB, PRELP) of which are in strong overlap ( $\chi^2$   $p=2.0 \times 10^{-71}$ ) with the 99 proteins higher in outer  
661 AF in the spatial proteome (Figure 3I). This indicates that key proteins defining a young outer AF  
662 is experiencing faster degradation in aged and degenerated samples.

663 Similarly, we identified two modules in the NP (Figure 7H), whereby one (magenta) corresponds  
664 to more degradation in the YND, and the other (blue) corresponds to more degradation in the AGD.  
665 Only 10 unique proteins were recorded in the magenta module (for YND), with COL2A1 being  
666 the most dominant (928 peptides); whereas 32 were recorded for the blue module (for AGD).  
667 Overall, there are more unique proteins involved in faster degradation in AGD AF and NP.

### 668 ***MRI landscape correlates with proteomic landscape***

669 We tested for a correlation between MRI signal intensity and proteome composition. In  
670 conventional 3T MRI of young discs, the NP is brightest reflecting its high hydration state while  
671 the AF is darker, thus less hydrated (Figure 1B; Supplemental Figure S14B). Since aged discs

672 present with more MRI phenotypes, we used higher resolution MRI (7T) on them (Figure 1C;  
673 Figure 8A), which showed less contrast between NP and AF than in the young discs. To enhance  
674 robustness, we obtained three transverse stacks per disc level for the aged discs (Figure 8B;  
675 Supplemental Figure S14D), and averaged the pixel intensities for the different compartments  
676 showing that overall, the inner regions were still brighter than the outer (Figure 8C).

677 Next, we performed a level-compartment bi-clustering on the pixel intensities of the aged disc  
678 MRIs, which was bound by disc level and compartment (Figure 8D). The findings resembled the  
679 proteomic clustering and PCA patterns (Figure 2; Supplemental Figure S6V-W). We performed a  
680 pixel intensity averaging of the disc compartments from the 3T images (Supplemental Figure 13B),  
681 and a level-compartment bi-clustering on the pixel intensities (Supplemental Figure S14C). While  
682 the clustering can clearly partition the inner from the outer disc compartments, the information  
683 value from each of the compartments is less due to the lower resolution of the MRI. In all, these  
684 results indicate a link between regional MRI landscapes and proteome profiles, prompting us to  
685 investigate their potential connections.

#### 686 *Proteome-wide associations with MRI landscapes reveals a hydration matrisome*

687 The MRI and the static proteome were done on the same specimens in both individuals, so we  
688 could perform proteome-wide associations with the MRI intensities. We detected 85 significantly  
689 correlated ECM proteins, hereby referred to as the hydration matrisome (Figure 8E). We found no  
690 collagen to be positively correlated with brighter MRI, which fits current understanding as  
691 collagens contribute to fibrosis and dehydration. Other classes of matrisome proteins were either  
692 positively or negatively correlated, with differential components for each class (Figure 8E).  
693 Positively correlated proteoglycans included EPYC, PRG4 (lubricin) and VCAN, consistent with  
694 their normal expression in a young disc and hydration properties. Negatively correlated proteins  
695 included OAF (TNC, SLRPs) and fibrotic (POSTN) markers (Figure 8E).

696 Given this MRI-proteome link and the greater dynamic ranges of MRI in the aged discs enabled  
697 by the higher resolution 7T MRIs (Figure 8D), we hypothesised that the hydration matrisome  
698 might be used to provide information about MRI intensities and thus disc hydration. To test this,  
699 we trained a LASSO regression model (Tibshirani, 1996) of the aged MRIs using the hydration  
700 matrisome (85 proteins), and applied the model to predict the intensity of the MRIs of the young

701 discs, based on the young proteome of the same 85 proteins. Remarkably, we obtained a PCC of  
702 0.689 ( $p=8.9\times 10^{-6}$ ; Spearman=0.776) between the actual and predicted MRI (Supplemental Figure  
703 S14E). The predicted MRI intensities of the young disc exhibited a smooth monotonic decrease  
704 from the NP towards IAF, then dropped suddenly towards the OAF (Figure 8F, right panel), with  
705 an ROC AUC (receiver operating characteristics, area under the curve) of 0.996 between IAF and  
706 OAF (Supplemental Figure S14F). In comparison, actual MRIs exhibited a linear decrease from  
707 NP to OAF (Figure 8F, left panel). On reviewing these two patterns, we argue that the predicted  
708 intensities may be a more faithful representation of the young discs' water contents than the actual  
709 MRI, as it reflects the gross images (Supplemental Figure S1A), PCA (Figure 3A) and Y1 modular  
710 trend in the young discs (Figure 3E). This exercise not only revealed the inherent connections  
711 between regional MRI and regional proteome, but also identified a set of ECM components that is  
712 predictive of MRI relating to disc hydration, which may be valuable for future clinical applications.

713

## 714 Discussion

715 Here, we present DIPPER – a human IVD proteomic resource comprising point-reference genome-  
716 wide profiles. The discovery dataset was established from intact lumbar discs of a young cadaver  
717 with no history of skeletal abnormalities (e.g. scoliosis), and an aged cadaver with reduced IVD  
718 MRI intensity and annular tears. Although these two individuals may not be representative of their  
719 respective age-groups, this is the first known attempt to achieve high spatial resolution profiles in  
720 the discs, adding a critical and much needed dimension to the current available IVD proteomic  
721 datasets. We showed that our spatiotemporal proteomes integrate well with the dynamic proteome  
722 and transcriptome of clinical samples, demonstrating their application values with other datasets.

723 In creating the point-references, we use a well-established protein extraction protocol (Onnerfjord  
724 et al., 2012b), and chromatographic fractionation of the peptides prior to mass spectrometry, we  
725 produced a dataset of the human intervertebral disc comprising 3,100 proteins, encompassing ~400  
726 matrisome and 2,700 non-matrisome proteins, with 1,769 proteins detected in 3 or more profiles,  
727 considerably higher than recent studies (Maseda et al., 2016; Rajasekaran et al., 2020; Ranjani et  
728 al., 2016; Sarath Babu et al., 2016). The high quality of our data enabled the application of unbiased  
729 approaches including PCA and ANOVA to reveal the relative importance of the phenotypic  
730 factors. Particularly, age was found to be the dominant factor influencing proteome profiles.

731 Comparisons between different compartments of the young disc produced a reference landscape  
732 containing known (KRT8/19 for the NP; COL1A1, CILP and COMP for the AF) and novel (FRZB,  
733 CHRDL2 for the NP; TNMD, SLRPs and SOD1 for the AF) markers. The young healthy  
734 discs were enriched for matrisome components consistent with a healthy functional young IVD.  
735 Despite morphological differences between NP and IAF, the inner disc compartments (NP,  
736 NP/IAF and IAF) display high similarities, in contrast to the large differences between IAF and  
737 OAF, which was consistent for discs from all lumbar disc levels. This morphological-molecular  
738 discrepancy might be accounted for by subtle differences in the ECM organisation, such as  
739 differences in GAG moieties on proteoglycans, or levels of glycosylation or other modifications  
740 of ECM that diversify function (Silagi et al., 2018). Nonetheless, we partitioned the detected  
741 proteins into a variable set that captures the diversity, and a constant set that lays the common  
742 foundation of all young compartments, which work in synergy to achieve disc function.

743 Clustering analysis of the 671 DEPs of the variable set identified 4 key modules (Y1-Y4). Visually,  
744 Y1 and Y2 mapped across the lateral and anteroposterior axes with opposing trends. Molecularly,  
745 module Y1 (NP) contained proteins promoting regulation of matrix remodelling, such as matrix  
746 degradation inhibitor MATN3 (Jayasuriya et al., 2012) and MMP inhibitor TIMP1. Inhibitors of  
747 WNT and BMP signalling were also present. Module Y2 (OAF) included COL1A1, THBS1/2/3,  
748 CILP1/CILP2 and TNMD, consistent with the OAF's tendon-like features (Nakamichi et al.,  
749 2018). It also included a set of SLRPs that might play roles in regulation of collagen assembly  
750 (Robinson et al., 2017; Taye et al., 2020), fibril alignment (Robinson et al., 2017), maturation and  
751 crosslinking (Kalamajski et al., 2016); while others are known to inhibit or promote TGF $\beta$   
752 signalling (Markmann et al., 2000). Notably, the composition of the IAF appeared to be a transition  
753 zone between NP and OAF rather than an independent compartment, as few proteins can  
754 distinguish it from adjacent compartments. Classes of proteins in both Y3 (smooth muscle feature)  
755 and Y4 (immune and blood) resemble Y2, which reflects the contractile property of the AF (Nakai  
756 et al., 2016) and the capillaries infiltrating or present at the superficial outer surface of the IVD.

757 In the aged disc, the change in the DEPs between the inner and outer regions of the discs suggests  
758 extensive changes in the inner compartment(s). Mapping the aged data onto modules Y1-Y4  
759 allowed a visualisation of the changes. The flattening of the Y1 and Y2 modules along both the  
760 lateral and anteroposterior axes indicated a convergence of the inner and outer disc. This is  
761 supported by the observed rapid decline of NP proteins and increase of AF proteins in the inner  
762 region. Fewer changes were seen in the aged OAF, which concurs with the notion that degenerative  
763 changes originate from the NP and radiate outwards, however, **infringement of IAF into the NP**  
764 cannot be excluded. The most marked change was seen in module Y4 (blood), where the pattern  
765 was inverted, characterised by high expression in the NP but low in OAF. While contamination  
766 cannot be excluded and there are reports that capillaries do not infiltrate the NP even in  
767 degeneration (Nerlich et al., 2007), our finding is consistent with other proteomic studies showing  
768 enrichment of blood proteins in pathological NP (Maseda et al., 2016). The route of infiltration  
769 can be from the fissured AF or cartilage endplates. Calcified endplates are more susceptible to  
770 microfractures, which can lead to blood infiltration into the NP (Sun et al., 2020). Of interest is  
771 the involvement of an immune response within the inner disc. This corroborates reports of  
772 inflammatory processes in ageing and degenerative discs, with the up-regulation of pro-

773 inflammatory cytokines and presence of inflammatory cells (Molinos et al., 2015; Wuertz et al.,  
774 2012).

775 The SILAC and degradome studies provided important insights into age-related differences in the  
776 biosynthetic and turnover activity in the IVD. The SILAC data indicated that protein synthesis is  
777 significantly impaired in aged degenerated discs. These findings correlate with reports of reduced  
778 cellularity in ageing (Rodriguez et al., 2011), which we have also ascertained by leveraging the  
779 relationship of histones and housekeeping genes with cell numbers. From the TAILS degradome  
780 analysis, we observed more cleaved protein fragments in aged compartments, particularly for  
781 structural proteins important for tissue integrity such as COMP and those involved in cell-matrix  
782 interactions such as FN1, which was coupled with the enrichment of the proteolytic process GO  
783 terms in the aged static proteome. Collectively, this reveals a systematic modification and  
784 replacement of the primary proteomic architecture of the young IVD with age that is associated  
785 with diminished or failure in functional properties in ageing or degeneration.

786 Despite known transcriptome-proteome discordance (Fortelny et al., 2017), our identification of  
787 concordant changes allow insights into active changes in the young and aged discs. For example,  
788 inhibitors of the WNT pathway and antagonists of BMP/TGF $\beta$  signalling (Leijten et al., 2013)  
789 were down regulated in the aged discs in both the proteome and transcriptome. Interestingly, the  
790 activation of these pathways is known to promote chondrocyte hypertrophy (Dong et al., 2006),  
791 and hypertrophy has been noted in IDD (Rutges et al., 2010). This suggests a model where the  
792 regulatory environment suppressing cellular hypertrophy changes with ageing or degeneration,  
793 resulting in conditions such as cellular senescence and tissue mineralisation that are part of the  
794 pathological process. In support, S100A1, a known inhibitor of chondrocyte hypertrophy (Saito et  
795 al., 2007) is down regulated, while chondrocyte hypertrophy markers *COL10A1* and *IBSP*  
796 (Komori, 2010) are up-regulated in the aged disc. Similar changes have been observed in ageing  
797 mouse NP (Veras et al., 2020) as well as in osteoarthritis (Zhu et al., 2009) where chondrocyte  
798 hypertrophy is thought to be involved in its aetiology (Ji et al., 2019; van der Kraan and van den  
799 Berg, 2012). Given that WNT inhibitors are already in clinical trials for osteoarthritis (Wang et  
800 al., 2019b), this may point to a prospective therapeutic strategy for IDD.



801 A key finding of our study is the direct demonstration, within a single individual, of association  
802 between the hydration status of the disc as revealed by MRI, and the matrix composition of  
803 the disc proteome. The remarkable correlation between predicted hydration states inferred from  
804 the spatial proteomic data and the high-definition phenotyping of the aged disc afforded by 7T  
805 MRI has enormous potential for understanding the molecular processes underlying IDD.

806 In conclusion, we have generated point-reference datasets of the young and aged disc proteome,  
807 at a significantly higher spatial resolution than previous works. By means of a methodological  
808 framework, we revealed compartmentalised information on the ECM composition and cellular  
809 activities, and their changes with ageing. Integration of this point-reference with additional age-  
810 and protein-specific information of synthesis/degradation help gain insights into the underlying  
811 molecular pathology of degeneration (Figure 8G & H). The richness of information in DIPPER  
812 makes it a valuable resource for cross referencing with human, animal and *in vitro* studies to  
813 evaluate clinical relevance and guide the development of therapeutics for human IDD.

814

815

## 816 **Materials and methods**

### 817 ***Cadaveric specimens***

818 Two human lumbar spines were obtained through approved regulations and governing bodies, with  
819 one young (16M) provided by L.H. (McGill University) and one aged (59M) from Articular  
820 Engineering, LLC (IL, USA). The young lumbar spine was received frozen as an intact whole  
821 lumbar spine. The aged lumbar spine was received frozen, dissected into bone-disc-bone segments.  
822 The cadaveric samples were stored at  $-80^{\circ}\text{C}$  until use.

### 823 ***Clinical specimens***

824 Clinical specimens were obtained with approval by the Institutional Review Board (references UW  
825 13-576 and EC 1516-00 11/01/2001) and with informed consent in accordance with the Helsinki  
826 Declaration of 1975 (revision 1983) from another 15 patients undergoing surgery for IDD, trauma  
827 or adolescent idiopathic scoliosis at Queen Mary Hospital (Hong Kong), and Duchess of Kent  
828 Children's Hospital (Hong Kong). Information of both the cadaveric and clinical samples are  
829 summarised in Table 1.

### 830 ***MRI imaging of cadaveric samples***

831 The discs were thawed overnight at  $4^{\circ}\text{C}$ , and then pre-equalised for scanning at room temperature.  
832 For the young IVD, these were imaged together as the lumbar spine was kept intact. T2-weighted  
833 and T1-weighted sagittal and axial MRI, T1-rho MRI and Ultrashort-time-to-echo MRI images  
834 were obtained using a 3T Philips Achieva 3.0 system at the Department of Diagnostic Radiology,  
835 The University of Hong Kong.

836 For the aged discs, the IVD were imaged separately as bone-disc-bone segments, at the Department  
837 of Electrical and Electronic Engineering, The University of Hong Kong. The MRS and CEST  
838 imaging were performed. The FOV for the CEST imaging was adjusted to  $76.8 \times 76.8 \text{ mm}^2$  to  
839 accommodate the size of human lumbar discs (matrix size =  $64 \times 64$ , slice thickness = 2 mm). All  
840 MRI experiments were performed at room temperature using a 7 T pre-clinical scanner (70/16  
841 Pharmascan, Bruker BioSpin GmbH, Germany) equipped with a 370 mT/m gradient system along

842 each axis. Single-channel volume RF coils with different diameters were used for the samples  
843 based on size (60 mm for GAG phantoms and human cadaveric discs).

#### 844 ***Image assessment of the aged lumbar IVD***

845 The MRI images in the transverse view were then assessed for intensity of the image (brighter  
846 signifying more water content). Three transverse MRI images per IVD were overlaid with a grid  
847 representing the areas that were cut for mass-spectrometry measurements as outlined previously.  
848 For each region, the ‘intensity’ was represented by the average of the pixel intensities, which were  
849 graphically visualised and used for correlative studies.

#### 850 ***Division of cadaveric IVD for mass spectrometry analysis***

851 The endplates were carefully cut off with a scalpel, exposing the surface of the IVD, which were  
852 then cut into small segments spanning seven segments in the central left-right lateral axis, and  
853 five segments in the central anteroposterior axis (Figure 1C). In all, this corresponds to a total of  
854 11 locations per IVD. Among them, 4 are from the OAF, 2 from the IAF (but only in the lateral  
855 axis), 1 from the central NP, and 4 from a transition zone between IAF and the NP (designated  
856 the ‘NP/IAF’). Samples were stored frozen at -80°C until use.

#### 857 ***SILAC by ex vivo culture of disc tissues***

858 NP and AF disc tissues from spine surgeries (Table 1) were cultured in custom-made Arg- and  
859 Lys-free  $\alpha$ -MEM (AthenaES) as per formulation of Gibco  $\alpha$ -MEM (Cat #11900-024),  
860 supplemented with 10% dialysed FBS (10,000 MWCO, Biowest, Cat# S181D),  
861 penicillin/streptomycin, 2.2 g/L sodium bicarbonate (Sigma), 30 mg/L L-methionine (Sigma), 21  
862 mg/L “heavy” isotope-labelled  $^{13}\text{C}_6$  L-arginine (Arg6, Cambridge Isotopes, Cat # CLM-2265-H),  
863 146 mg/L “heavy” isotope-labelled 4,4,5,5-D4 L-Lysine (Lys4, Cambridge Isotopes, Cat # DLM-  
864 2640). Tissue explants were cultured for 7 days in hypoxia (1%  $\text{O}_2$  and 5%  $\text{CO}_2$  in air) at 37°C  
865 before being washed with PBS and frozen until use.

#### 866 ***Protein extraction and preparation for cadaveric and SILAC samples***

867 The frozen samples were pulverised using a freezer mill (Spex) under liquid nitrogen. Samples  
868 were extracted using 15 volumes (w/v) of extraction buffer (4M guanidine hydrochloride (GuHCl),

869 50 mM sodium acetate, 100 mM 6-aminocaproic acid, and HALT protease inhibitor cocktail  
870 (Thermo Fischer Scientific), pH 5.8). Samples were mechanically dissociated with 10 freeze-thaw  
871 cycles and sonicated in a cold water bath, before extraction with gentle agitation at 4°C for 48  
872 hours. Samples were centrifuged at 15,000g for 30 minutes at 4°C and the supernatant was ethanol  
873 precipitated at a ratio of 1:9 for 16 hours at -20°C. The ethanol step was repeated and samples were  
874 centrifuged at 5000 g for 45 min at 4°C, and the protein pellets were air dried for 30 min.

875 Protein pellets were re-suspended in fresh 4M urea in 50 mM ammonium bicarbonate, pH 8, using  
876 water bath sonication to aid in the re-solubilisation of the samples. Samples underwent reduction  
877 with TCEP (5mM final concentration) at 60°C for 1 hr, and alkylation with iodoacetamide (500  
878 mM final concentration) for 20 min at RT. Protein concentration was measured using the BCA  
879 assay (Biorad) according to manufacturer's instructions. 200 µg of protein was then buffer  
880 exchanged with 50 mM ammonium bicarbonate with centricon filters (Millipore, 30 kDa cutoff)  
881 according to manufacturer's instructions. Samples were digested with mass spec grade  
882 Trypsin/LysC (Promega) as per manufacturer's instructions. For SILAC-labelled samples, formic  
883 acid was added to a final concentration of 1%, and centrifuged and the supernatant then desalted  
884 prior to LC-MS/MS measurements. For the cadaveric samples, the digested peptides were then  
885 acidified with TFA (0.1% final concentration) and quantified using the peptide quantitative  
886 colorimetric peptide assay kit (Pierce, catalogue 23275) before undergoing fractionation using the  
887 High pH reversed phase peptide fractionation kit (Pierce, catalogue number 84868) into four  
888 fractions. Desalted peptides, were dried, re-suspended in 0.1% formic acid prior to LC-MS/MS  
889 measurements.

### 890 ***Mass spectrometry for cadaveric and SILAC samples***

891 Samples were loaded onto the Dionex UltiMate 3000 RSLC nano Liquid Chromatography coupled  
892 to the Orbitrap Fusion Lumos Tribrid Mass Spectrometer. Peptides were separated on a commercial  
893 Acclaim C18 column (75 µm internal diameter × 50 cm length, 1.9 µm particle size; Thermo).  
894 Separation was attained using a linear gradient of increasing buffer B (80% ACN and 0.1% formic  
895 acid) and declining buffer A (0.1% formic acid) at 300 nL/min. Buffer B was increased to 30% B  
896 in 210 min and ramped to 40% B in 10 min followed by a quick ramp to 95% B, where it was held  
897 for 5 min before a quick ramp back to 5% B, where it was held and the column was re-equilibrated.

898 Mass spectrometer was operated in positive polarity mode with capillary temperature of 300°C.  
899 Full survey scan resolution was set to 120 000 with an automatic gain control (AGC) target value  
900 of  $2 \times 10^6$ , maximum ion injection time of 30 ms, and for a scan range of 400–1500 m/z. Data  
901 acquisition was in DDA mode to automatically isolate and fragment topN multiply charged  
902 precursors according to their intensities. Spectra were obtained at 30000 MS2 resolution with AGC  
903 target of  $1 \times 10^5$  and maximum ion injection time of 100 ms, 1.6 m/z isolation width, and  
904 normalised collisional energy of 31. Preceding precursor ions targeted for HCD were dynamically  
905 excluded of 50 s.

### 906 ***Label free quantitative data processing for cadaveric samples***

907 Raw data were analysed using MaxQuant (v.1.6.3.3, Germany). Briefly, raw files were searched  
908 using Andromeda search engine against human UniProt protein database (20,395 entries, Oct  
909 2018), supplemented with sequences of contaminant proteins. Andromeda search parameters for  
910 protein identification were set to a tolerance of 6 ppm for the parental peptide, and 20 ppm for  
911 fragmentation spectra and trypsin specificity allowing up to 2 miscleaved sites. Oxidation of  
912 methionine, carboxyamidomethylation of cysteines was specified as a fixed modification. Minimal  
913 required peptide length was specified at 7 amino acids. Peptides and proteins detected by at least  
914 2 label-free quantification (LFQ) ion counts for each peptide in one of the samples were accepted,  
915 with a false discovery rate (FDR) of 1%. Proteins were quantified by normalised summed peptide  
916 intensities computed in MaxQuant with the LFQ option enabled. A total of 66 profiles were  
917 obtained: 11 locations  $\times$  3 disc levels  $\times$  2 individuals; with a median of 665 proteins (minimum  
918 419, maximum 1920) per profile.

### 919 ***Data processing for SILAC samples***

920 The high resolution, high mass accuracy mass spectrometry (MS) data obtained were processed  
921 using Proteome Discoverer (Ver 2.1), wherein data were searched using Sequest algorithm against  
922 Human UniProt database (29,900 entries, May 2016), supplemented with sequences of  
923 contaminant proteins, using the following search parameters settings: oxidized methionine (M),  
924 acetylation (Protein N-term), heavy Arginine (R6) and Lysine (K4) were selected as dynamic  
925 modifications, carboxyamidomethylation of cysteines was specified as a fixed modification,  
926 minimum peptide length of 7 amino acids was enabled, tolerance of 10 ppm for the parental

927 peptide, and 20 ppm for fragmentation spectra, and trypsin specificity allowing up to 2 miscleaved  
928 sites. Confident proteins were identified using a target-decoy approach with a reversed database,  
929 strict FDR 1% at peptide and PSM level. Newly synthesised proteins were heavy labelled with  
930 Arg6- and Lys4 and the data was expressed as the normalised protein abundance obtained from  
931 heavy (labelled)/light (un-labelled) ratio.

### 932 ***Degradome sample preparation, mass spectrometry and data processing***

933 Degradome analyses was performed on NP and AF from three non-degenerated and three  
934 degenerated individuals (Table 1). Frozen tissues were pulverised as described above and prepared  
935 for TAILS as previously reported (Kleifeld et al., 2010). After extraction with SDS buffer (1%  
936 SDS, 100 mM dithiothreitol, 1X protease inhibitor in deionised water) and sonication (three cycles,  
937 15s/cycle), the supernatant (soluble fraction) underwent reduction at 37<sup>0</sup>C and alkylation with a  
938 final concentration of 15mM iodoacetamide for 30 min at RT. Samples were precipitated using  
939 chloroform/methanol, and the protein pellet air dried. Samples were re-suspended in 1M NaOH,  
940 quantified by nanodrop, diluted to 100mM HEPES and 4M GnHCl and pH adjusted pH6.5-7.5)  
941 prior to 6-plex TMT labelling as per manufacturer's instructions (Sixplex TMT, Cat# 90061,  
942 ThermoFisher Scientific). Equal ratios of TMT-labelled samples were pooled and  
943 methanol/chloroform precipitated. Protein pellets were air-dried and re-suspended in 200mM  
944 HEPES (pH8), and digested with trypsin (1:100 ratio) for 16 hr at 37<sup>0</sup>C, pH 6.5 and a sample was  
945 taken for pre-TAILS. High-molecular-weight dendritic polyglycerol aldehyde polymer (ratio of  
946 5:1 w/w polymer to sample) and NaBH<sub>3</sub>CN (to a final concentration of 80 mM) was added,  
947 incubated at 37<sup>0</sup>C for 16 hr, followed by quenching with 100 mM ethanolamine (30 min at 37<sup>0</sup>C)  
948 and underwent ultrafiltration (MWCO of 10,000). Collected samples were desalted, acidified to  
949 0.1% formic acid and dried, prior to MS analysis.

950 Samples were analysed on a Thermo Scientific Easy nLC-1000 coupled online to a Bruker  
951 Daltonics Impact II UHR QTOF. Briefly, peptides were loaded onto a 20cm x 75µm I.D. analytical  
952 column packed with 1.8µm C18 material (Dr. Maisch GmbH, Germany) in 100% buffer A (99.9%  
953 H<sub>2</sub>O, 0.1% formic acid) at 800 bar followed by a linear gradient elution in buffer B (99.9%  
954 acetonitrile, 0.1% formic acid) to a final 30% buffer B for a total 180 min including washing with  
955 95% buffer B. Eluted peptides were ionized by ESI and peptide ions were subjected to tandem MS

956 analysis using a data-dependent acquisition method. A top17 method was employed, where the top  
957 17 most intense multiply charged precursor ions were isolated for MS/MS using collision-induced-  
958 dissociation, and actively excluded for 30s.

959 MGF files were extracted and searched using Mascot against the UniProt Homo sapiens database,  
960 with semi-ArgC specificity, TMT6plex quantification, variable oxidation of methionine, variable  
961 acetylation of N termini, 20 ppm MS1 error tolerance, 0.05 Da MS2 error tolerance and 2 missed  
962 cleavages. Mascot .dat files were imported into Scaffold Q+S v4.4.3 for peptide identification  
963 processing to a final FDR of 1%. Quantitative values were calculated through Scaffold and used  
964 for subsequent analyses.

### 965 ***Transcriptomic samples: isolation, RNA extraction and data processing***

966 AF and NP tissues from 4 individuals were cut into approximately 0.5cm<sup>3</sup> pieces, and put into the  
967 Dulbecco's modified Eagle's medium (DMEM) (Gibco) supplemented with 20 mM HEPES  
968 (USB), 1% penicillin-streptomycin (Gibco) and 0.4% fungizone (Gibco). The tissues were  
969 digested with 0.2% pronase (Roche) for 1 hour, and centrifuged at 200 g for 5 min to remove  
970 supernatant. AF and NP were then digested by 0.1% type II collagenase (Worthington  
971 Biochemical) for 14 hours and 0.05% type II collagenase for 8 hours, respectively. Cell suspension  
972 was filtered through a 70 µm cell strainer (BD Falcon) and centrifuged at 200 g for 5 min. The cell  
973 pellet was washed with phosphate buffered saline (PBS) and centrifuged again to remove the  
974 supernatant. RNA was then extracted from the isolated disc cells using Absolutely RNA Nanoprep  
975 Kit (Stratagene), following manufacturer's protocol, and stored at -80°C until further processing.

976 The quality and quantity of total RNA were assessed on the Bioanalyzer (Agilent) using the RNA  
977 6000 Nano total RNA assay. cDNA was generated using Affymetrix GeneChip Two-Cycle cDNA  
978 Synthesis Kit, followed by *in vitro* transcription to produce biotin-labelled cRNA. The sample was  
979 then hybridised onto the Affymetrix GeneChip Human Genome U133 Plus 2.0 Array. The array  
980 image, CEL file and other related files were generated using Affymetrix GeneChip Command  
981 Console. The experiment was conducted as a service at the Centre for PanorOmic Sciences of the  
982 University of Hong Kong.



983 CEL and other files were loaded into GeneSpring GX 10 (Agilent) software. The RMA algorithm  
984 was used for probe summation. Data were normalised with baseline transformed to median of all  
985 samples. A loose filtering based on the raw intensity values was then applied to remove  
986 background noise. Consequently, transcriptomic data with a total of 54,675 probes (corresponding  
987 to 20,887 genes) and 8 profiles were obtained.

## 988 ***Bioinformatics and functional analyses***

989 The detected proteins were compared against the transcription factor (TF) database (Vaquerizas et  
990 al., 2009) and the human genome nomenclature consortium database for cell surface markers  
991 (CDs) (Braschi et al., 2019), where 77 TFs and 83 CDs were detected (Supplemental Figure S3A).  
992 Excluding missing values, the LFQ levels among the data-points range from 15.6 to 41.1, with a  
993 Gaussian-like empirical distribution (Supplemental Figure S5A). The numbers of valid values per  
994 protein were found to decline rapidly when they were sorted in descending order (Supplemental  
995 Figure S5B, upper panel). To perform principal component analyses (PCAs), only a subset of  
996 genes with sufficiently large numbers of valid values (i.e. non-missing values) were used. The cut-  
997 off for this was chosen based on a point corresponding to the steepest slope of descending order  
998 of valid protein numbers (Supplemental Figure S5B, second panel), such that the increase of valid  
999 values is slower than the increase of missing values beyond that point. Subsequently, the top 507  
1000 genes were picked representing 59.8% of all valid values. This new subset includes 12.4% of all  
1001 missing values. Since the subset of data still contains some missing values, an imputation strategy  
1002 was adopted employing the Multiple Imputation by Chained Equations (MICE) method and  
1003 package (van Buuren and Groothuis-Oudshoorn, 2011), with a max iteration set at 50 and the  
1004 default PMM method (predictive mean matching). To further ensure normality, Winsorisation was  
1005 applied such that genes whose average is below 5% or above 95% of all genes were also excluded  
1006 from PCA. The data was then profile-wise standardised (zero-mean and 1 standard deviation)  
1007 before PCA was applied on the R platform (Team, 2013).

1008 To assess the impact of the spatiotemporal factors on the proteomic profiles, we performed  
1009 Analysis of Variance (ANOVA), correlating each protein to the age, compartments, level, and  
1010 directionality. To draw the soft boundaries on the PCA plot between groups of samples, support  
1011 vector machines with polynomial (degree of 2) kernel were applied using the LIBSVM package

1012 (Chang and Lin, 2011) and the PCA coordinates as inputs for training. A meshed grid covering the  
1013 whole PCA field was created to make prediction and draw probability contours for -0.5, 0, and 0.5  
1014 from the fitted model. Hierarchical clustering was performed with (1- correlation coefficient) as  
1015 the distance metrics unless otherwise specified.

1016 To address the problem of ‘dropout’ effects while avoiding extra inter-dependency introduced due  
1017 to imputations, we adopted three strategies in calculating the differentially expressed proteins  
1018 (DEPs), namely, by statistical testing, exclusively detected, and fold-change cutoff approaches.  
1019 First, for the proteins that have over half valid values in both groups under comparison, we  
1020 performed t-testing with p-values adjusted for multiple testing by the false discovery rate (FDR).  
1021 Those with FDR below 0.05 were considered statistical DEPs. Second, for the proteins where one  
1022 group has some valid values while the other group is completely not detected, we considered the  
1023 ones with over half valid values in one group to be exclusive DEPs. For those proteins that were  
1024 expressed in <50% in both groups, the ones with fold-change greater than 2 were also considered  
1025 to be DEPs.

1026 To fit the lateral and anteroposterior trends for the modules of genes identified in the young  
1027 samples, a Gaussian Process Estimation (GPE) model was trained using the GauPro package in R  
1028 (Team, 2013). Pathway analyses was conducted on the GSEA (Subramanian et al., 2005).  
1029 Signalling proteins was compiled based on 25 Signal transduction pathways listed on KEGG  
1030 (Kanehisa et al., 2019).

1031 For transcriptomic data, we used a thresholding approach to detect DEGs (differentially expressed  
1032 genes), whereby a gene was considered a DEG if the  $\log_2(\text{fold-change})$  is greater than 3 and the  
1033 average expression (logarithmic scale) is greater than 10 (Supplemental Figure S11E-H).

1034 The LASSO model between MRI and proteome was trained using the R package “glmnet”,  
1035 wherein the 85 ECMs were first imputed for missing values in them using MICE. Nine ECMs  
1036 were not imputed for too many missing values, leaving 76 for training and testing. The best value  
1037 for  $\lambda$  was determined by cross-validations. A model was then trained on the aged MRIs (dependent  
1038 variable) and aged proteome of the 76 genes (independent variable). The fitted model was then  
1039 applied to the young proteome to predict MRIs of the young discs.

1040 ***Raw data depository and software availability***

1041 The mass spectrometry proteomics data have been deposited to the ProteomeXchange Consortium  
1042 via the PRIDE (Vizcaino et al., 2016) repository with the following dataset identifiers for cadaver  
1043 samples (PXD017774), SILAC samples (PXD018193), and degradome samples  
1044 (PXD018298000). The RAW data for the transcriptome data has been deposited on NCBI GEO  
1045 with accession number GSE147383. The custom scripts for processing and analysing the data were  
1046 housed at [github.com/hkudclab/DIPPER](https://github.com/hkudclab/DIPPER). An interactive web interface for the data is available at  
1047 [sbms.hku.hk/dclab/DIPPER](https://sbms.hku.hk/dclab/DIPPER) .

1048 **Tables**

1049 **Table 1.** Summary of disc samples in DIPPER.

| <b>Samples</b>               | <b>Age</b> | <b>Sex</b> | <b>Disc level/s</b> | <b>Disc regions</b>  | <b>Reason for surgery</b> |
|------------------------------|------------|------------|---------------------|----------------------|---------------------------|
| <b>Cadaver samples</b>       |            |            |                     |                      |                           |
| Young spine                  | 16         | M          | L3/4, L4/5, L5/S1   | NP, NP/IAF, IAF, OAF | N/A                       |
| Aged spine                   | 59         | M          | L3/4, L4/5, L5/S1   | NP, NP/IAF, IAF, OAF | N/A                       |
| <b>Transcriptome samples</b> |            |            |                     |                      |                           |
| YND74                        | 17         | M          | L1/2                | NP, OAF              | Scoliosis                 |
| YND88                        | 16         | M          | L1/2                | NP, OAF              | Scoliosis                 |
| AGD40                        | 62         | F          | L4/5                | NP, OAF              | Degeneration              |
| AGD45                        | 47         | M          | L4/5                | NP, OAF              | Degeneration              |
| <b>SILAC samples</b>         |            |            |                     |                      |                           |
| YND148                       | 19         | F          | L2/3                | OAF                  | Scoliosis                 |
| YND149                       | 15         | F          | L1/2                | OAF                  | Scoliosis                 |
| YND151                       | 15         | F          | L1/2                | NP, OAF              | Scoliosis                 |
| YND152                       | 14         | F          | L1/2                | NP, OAF              | Scoliosis                 |
| AGD80                        | 63         | M          | L4/5                | NP, OAF              | Degeneration              |
| <b>Degradome samples</b>     |            |            |                     |                      |                           |
| YND136                       | 17         | F          | L1/2                | NP, OAF              | Scoliosis                 |
| YND141                       | 20         | F          | L1/2                | NP, OAF              | Scoliosis                 |
| AGD143                       | 53         | M          | L1/2                | NP, OAF              | Trauma                    |
| AGD62                        | 55         | F          | L5/S1               | NP, OAF              | Degeneration              |
| AGD65                        | 68         | F          | L4/5                | NP, OAF              | Degeneration              |
| AGD67                        | 55         | M          | L4/5                | NP, OAF              | Degeneration              |

1050

1051 **Table 2.** Commonly expressed ECM and associated proteins across all 66 profiles in the spatial  
 1052 proteome.

| <b>Categories<br/>(Number of proteins)</b> | <b>Protein names</b>                                                                                                                                                                                           |
|--------------------------------------------|----------------------------------------------------------------------------------------------------------------------------------------------------------------------------------------------------------------|
| <b>Core matrisome</b>                      |                                                                                                                                                                                                                |
| Collagens (13)                             | COL1A1/2, COL2A1, COL3A1, COL5A1, COL6A1/2/3, COL11A1/2, COL12A1, COL14A1, COL15A1                                                                                                                             |
| Proteoglycans (14)                         | ACAN, ASPN, BGN, CHAD, DCN, FMOD, HAPLN1, HSPG2, LUM, OGN, OMD, PRELP, PRG4, VCAN                                                                                                                              |
| Glycoproteins (34)                         | ABI3BP, AEBP1, CILP, CILP2, COMP, DPT, ECM2, EDIL3, EFEMP2, EMILIN1, FBN1, FGA, FGB, FN1, FNDC1, LTBP2, MATN2/3, MFGE8, MXRA5, NID2, PCOLCE, PCOLCE2, PXDN, SMOC1/2, SPARC, SRPX2, TGFBI, THBS1/2/4, TNC, TNXB |
| <b>Other matrisome</b>                     |                                                                                                                                                                                                                |
| ECM affiliated proteins (10)               | ANXA1/2/4/5/6, CLEC11A, CLEC3A/B, CSPG4, SEMA3C                                                                                                                                                                |
| ECM regulators (16)                        | A2M, CD109, CST3, F13A1, HTRA1, HTRA3, ITIH5, LOXL2/3, PLOD1, SERPINA1/3/5, SERPINE2, SERPING1, TIMP1                                                                                                          |
| Secreted factors (2)                       | ANGPTL2, FGF2                                                                                                                                                                                                  |

1053

1054 **Supplemental Tables**

1055 **Supplemental Table 1.** Processed data of the 66 LC-MS/MS static spatial proteome profiles, the  
1056 8 heavy-to-light ratios of the SILAC data, the 12 degradome profiles, and the 8 transcriptomic  
1057 profiles.

1058 **Supplemental Table 2.** Differentially expressed proteins (DEPs) among pairs of sample groups  
1059 within the 33 young static spatial disc profiles.

1060 **Supplemental Table 3.** Differentially expressed proteins (DEPs) among pairs of sample groups  
1061 within the 33 aged static spatial disc profiles.

1062 **Supplemental Table 4.** Differentially expressed proteins (DEPs) between young and aged  
1063 sample groups of static spatial proteomes.

1064 **Supplemental Table 5.** Significantly enriched gene ontology (GO) terms associated with  
1065 proteins expressed higher in all young or all aged discs.

1066

1067 **Figure legends**

1068 **Figure 1.** Outline of samples, workflow, MRI, and global overview of data in DIPPER.

1069 (A) Schematic diagram showing the structure of the samples, data types, and flow of analyses  
1070 in DIPPER.  $n$  is the number of individuals.  $N$  is the number of genome-wide profiles.

1071 (B) Clinical T2-weighted MRI images (3T) of the young lumbar discs in the sagittal and  
1072 transverse plane (left and right panels), T1 MRI image of the young lumbar spine (middle  
1073 panel).

1074 (C) High resolution (7T) T2-weighted MRI of the aged lower lumbar spine in sagittal (left  
1075 panel) and transverse plane (right panel).

1076 (D) Diagram showing the anatomy of the IVD and locations from where the samples were  
1077 taken. VB: vertebral body; NP, nucleus pulposus; AF, annulus fibrosus; IAF: inner AF;  
1078 OAF: outer AF; NP/IAF: a transition zone between NP and IAF.

1079 (E) Venn diagrams showing the overlap of detected proteins in the four major compartments.  
1080 Top panel, young and aged profiles; middle, young only; bottom, aged only.

1081 (F) Barchart showing the numbers of proteins detected per sample, categorised into  
1082 matrixome (coloured) or non-matrixome proteins (grey).

1083 (G) Barcharts showing the composition of the matrixome and matrixome-associated proteins.  
1084 Heights of bars indicate the number of proteins in each category expressed per sample.  
1085 The N number in brackets indicate the aggregate number of proteins.

1086 (H) Violin plots showing the level of sub-categories of ECMs in different compartments of  
1087 the disc. The green number on top of each violin shows its median. LFQ: Label Free  
1088 Quantification.

1089 (I) Top 30 HGNC gene families for all non-matrixome proteins detected in the dataset.

1090 (J) Violin plots showing the averaged expression levels of 10 detected histones across the  
1091 disc compartments and age-groups.

1092 (K) Scatter-plot showing the co-linearity between GAPDH and histones.

1093 **Figure 2.** Principle component analysis (PCA) of the 66 static spatial profiles based on a set of  
1094 507 genes selected by optimal cut-off (see Supplemental Figure S5A-C).

1095 (A) Scatter-plot of PC1 and PC2 color-coded by compartments, and dot-shaped by age-  
1096 groups. Solid curves are the support vector machines (SVMs) decision boundaries



- 1097 between inner disc regions (NP, NP/IAF, IAF) and OAF, and dashed curves are soft  
1098 boundaries for probability equal to  $\pm 0.5$  and are applied to all plots in this figure.
- 1099 (B) Scatter-plot of PC1 and PC2 color-coded by disc levels. The SVM boundaries are trained  
1100 between L5/S1 and upper levels (L3/4 and L4/5).
- 1101 (C) Scatter-plot of PC1 and PC3, color-coded by disc compartments. The SVM boundaries  
1102 are trained between inner disc regions and OAF.
- 1103 (D) Scatter-plot of PC1 and PC3, color-coded by disc levels. The SVM boundaries are  
1104 trained between L5/S1 and upper levels (L3/4 and L4/5).
- 1105 (E) Top 100 positively and negatively correlated genes with PC1, color-coded by ECM  
1106 categories.
- 1107 (F) Top 100 positively and negatively correlated genes with PC2, color-coded by ECM  
1108 categories.
- 1109 (G) Top 100 positively and negatively correlated genes with PC3, color-coded by ECM  
1110 categories.

1111 **Figure 3.** Delineating the young and healthy discs' static spatial proteome.

- 1112 (A) PCA plot of all 33 young profiles. Curves in the upper panel show the SVM boundaries  
1113 between the OAF and inner disc regions, those in the lower panel separate the L5/S1 disc  
1114 from the upper disc levels. L, left; R, right; A, anterior; P, posterior.
- 1115 (B) A schematic illustrating the partitioning of the detected human disc proteome into  
1116 variable and constant sets.
- 1117 (C) A histogram showing the distribution of non-DEPs in terms of their detected frequencies  
1118 in the young discs. Only 245 non-DEP proteins were detected in over 16 profiles, which  
1119 is thus defined to be the constant set; while the remaining  $\sim 1,000$  proteins were  
1120 considered marginally detected.
- 1121 (D) Piecharts showing the ECM compositions in the variable (left) and constant (right) sets.  
1122 The constant set proteins that were detected in all 33 young profiles are listed at the  
1123 bottom.
- 1124 (E) Normalised expression (Z-scores) of proteins in the young module Y1 (NP signature)  
1125 laterally (top panel) and anteroposteriorly (bottom panel), for all three disc levels  
1126 combined. The red curve is the Gaussian Process Estimation (GPE) trendline, and the  
1127 blue curves are 1 standard deviation above or below the trendline.

- 1128 (F) Lateral trends of module Y2 (AF signature) for each of the three disc levels.  
1129 (G) Lateral trends of module Y3 (Smooth muscle cell signature) for each of the three disc  
1130 levels.  
1131 (H) Lateral trends of module Y4 (Immune and blood) for each of the three disc levels.  
1132 (I) Volcano plot of differentially expressed proteins (DEPs) between OAF and inner disc (an  
1133 aggregate of NP, NP/IAF, IAF), with coloured dots representing DEPs.  
1134 (J) A functional categorisation of the DEPs in (I).

1135 **Figure 4.** Characterisation of the aged discs' static spatial proteome.

- 1136 (A) PCA plot of all the aged profiles on PC1 and PC2, color-coded by compartments. Curves  
1137 in the left panel show the SVM boundaries between OAF and inner disc; those in the  
1138 right panel separate the L5/S1 disc from the upper disc levels. Letters on dots indicate  
1139 directions: L, left; R, right; A, anterior; P, posterior.  
1140 (B) Volcano plot showing the DEPs between the OAF and inner disc (an aggregate of NP,  
1141 NP/IAF and IAF), with the coloured dots representing statistically significant  
1142 (FDR<0.05) DEPs.  
1143 (C) Using the same 4 modules identified in young samples, we determined the trend for these  
1144 in the aged samples. Locational trends of module Y1 showing higher expression in the  
1145 inner disc, albeit they are more flattened than in the young disc samples. Top panel shows  
1146 left to right direction and bottom panel shows anterior to posterior direction. The red  
1147 curve is the Gaussian Process Estimation (GPE) trendline, and the blue curves are 1  
1148 standard deviation above or below the trendline. This also applies to (D), (E) and (F).  
1149 (D) Lateral trends for module Y2 in the aged discs.  
1150 (E) Lateral trends for module Y3 in the aged discs.  
1151 (F) Lateral trends for module Y4 in the aged discs.

1152 **Figure 5.** Comparison between young and aged static spatial proteomes.

- 1153 (A) Volcano plot showing the DEPs between all the 33 young and 33 aged profiles. Coloured  
1154 dots represent statistically significant DEPs.  
1155 (B) GO term enrichment of DEPs higher in young profiles.

- 1156 (C) GO term enrichment of DEPs higher in aged profiles. Full names of GO terms in (B) and  
1157 (C) are listed in Supplemental Table S5.
- 1158 (D) Volcano plot showing DEPs between aged and young inner disc regions.
- 1159 (E) Volcano plot showing DEPs between aged and young OAF.
- 1160 (F) Venn diagram showing the partitioning of the young/aged DEPs that were down-  
1161 regulated in aged discs, into contributions from inner disc regions and OAF.
- 1162 (G) Venn diagram showing the partitioning of the young/aged DEPs that were up-regulated  
1163 in aged discs, into contributions from inner disc regions and OAF.
- 1164 (H) A heat map showing proteins expressed in all young and aged disc, with the  
1165 identification of 6 modules (module 1: higher expression in young inner disc regions,  
1166 modules 2 and 4: higher expression in young OAF, module 3: highly expressing in aged  
1167 OAF, module 5: higher expression across all aged samples, and module 6: higher  
1168 expression in aged inner disc, and some OAF).
- 1169 (I) An alluvial chart showing the six modules identified in (H) and their connections to the  
1170 previously identified four modules and constant set in the young reference proteome; as  
1171 well as their connections to enriched GO terms.

1172 **Figure 6.** Concordance between static spatial proteomic and transcriptome data.

- 1173 (A) A PCA plot of the 8 transcriptomic profiles. Curves represent SVM boundaries between  
1174 patient-groups or compartments.
- 1175 (B) Venn diagrams showing the partitioning of the young/aged DEGs into contributions from  
1176 inner disc regions and OAF. Left: down-regulated in AGD samples; right: up-regulated.
- 1177 (C) Transcriptome data from the NP and AF of two young individuals were compared to the  
1178 proteomic data, with coloured dots representing identified proteins also expressed at the  
1179 transcriptome level.
- 1180 (D) Transcriptome and proteome comparison of aged OAF and NP.
- 1181 (E) Transcriptome and proteome comparison of young and aged OAF.
- 1182 (F) Transcriptome and proteome comparison of young and aged NP.

1183 **Figure 7.** The dynamic proteome of the intervertebral disc shows less biosynthesis of proteins in  
1184 aged tissues.

- 1185 (A) Schematic showing pulse-SILAC labelling of *ex-vivo* cultured disc tissues where heavy  
1186 Arg and Lys are incorporated into newly made proteins (heavy), and pre-existing proteins  
1187 remaining unlabelled (light). NP and AF tissues from young (n=3) and aged (n=1) were  
1188 cultured for 7 days in hypoxia prior to MS.
- 1189 (B) Barcharts showing the number of identified non-matrisome (grey) and matrisome  
1190 (coloured) existing proteins (middle panel); newly synthesised proteins (left panel), and  
1191 the heavy/light ratio (right panel) for each of the samples.
- 1192 (C) The quantities of each of the heavy labelled (newly synthesised) proteins identified for  
1193 each of the four groups were averaged, and then plotted in descending order of  
1194 abundance. It shows that YND AF and NP synthesise higher numbers of proteins than the  
1195 AGD AF and NP. The red dotted reference line shows the expression of GAPDH.
- 1196 (D) The quantities of each of the light (existing) proteins identified for each group was  
1197 averaged, and then plotted in descending order of abundance which shows that there are  
1198 similar levels of existing proteins in the four pooled samples.
- 1199 (E) The matrisome proteins of (C) were singled out for display. The abundance of these  
1200 proteins in YND samples were generally higher across all types of matrisome proteins  
1201 than the AGD, with the exceptions of aged related proteins.
- 1202 (F) Schematic showing the workflow of degradome analysis by N-terminal amine isotopic  
1203 labelling (TAILS) for the identification of cleaved neo N-terminal peptides.
- 1204 (G) Heatmap showing the identification of cleaved proteins ranked according to tandem mass  
1205 tag (TMT) isobaric labelling of N-terminal peptides in NP. Data is expressed as the  
1206  $\log_2(\text{ratio})$  of N-terminal peptides.
- 1207 (H) Heatmap showing the identification of cleaved proteins ranked according to tandem mass  
1208 tag (TMT) isobaric labelling of N-terminal peptides in AF. Data is expressed as the  
1209  $\log_2(\text{ratio})$  of N-terminal peptides. AGD143 in (G) and (H) is aged but not degenerated  
1210 (trauma).

1211 **Figure 8.** MRI intensities and their correlation with the proteomic data.

- 1212 (A) The middle MRI stack of each disc level in the aged cadaveric sample.  
1213 (B) Schematic of the disc showing the three stacks of MRI images per disc.

- 1214 (C) Violin plots showing the pixel intensities within each location per disc level,  
1215 corresponding to the respective locations taken for mass spectrometry measurements.  
1216 Each violin-plot is the aggregate of three stacks of MRIs per disc.
- 1217 (D) A heatmap bi-clustering of levels and compartments based on the MRI intensities.
- 1218 (E) The hydration ECMs: the ECM proteins most positively and negatively correlated with  
1219 MRI.
- 1220 (F) The 3T MRI intensities of the young discs across the compartments (left), and the  
1221 predicted MRI intensities based on a LASSO regression model trained on the hydration  
1222 ECMs (right).
- 1223 (G) A water-tank model of the dynamics in disc proteomics showing the balance of the  
1224 proteome is maintained by adequate anabolism to balance catabolism.
- 1225 (H) Diagram showing the partitioning of the detected proteins into variable and constant sets,  
1226 whereby four modules characterising the young healthy disc were further derived; and  
1227 showing their changes with ageing. SMC: smooth muscle cell markers.

1228 **Author contributions**

1229 VT handled IRB/IC, coordinated MRI measurements, performed tissue dissection, sample  
1230 preparation, data processing (MaxQuant), analyses (Perseus) and interpretation, prepared figures.  
1231 PKC performed bioinformatics analyses (ANOVA, PCA, SVM, DEGs, GPE, LASSO), and  
1232 prepared figures. VT and PKC wrote the first draft of the manuscript. AY generated the microarray  
1233 data. RS, NS and TK performed the mass spectrometry and processed the data, supervised and  
1234 funded by CMO. MK, PS and WC were involved in interpretation. LH provided the young spine  
1235 and interpreted the data. KC provided critical input, interpreted results and was involved in writing.  
1236 DC conceived ideas, supervised the project, interpreted data and results, wrote the manuscript. All  
1237 authors contributed to writing and approved the manuscript.

1238 **Acknowledgments**

1239 We thank Dr Ed Wu and Dr Anna Wang of the Dept of EEE at HKU for performing the high-  
1240 resolution MRI on the aged discs. We thank Dr Dino Samartzis for arranging the MRI of the young  
1241 lumbar spine, and Prof. Kenneth Cheung and Dr Jason Cheung for collecting surgical disc  
1242 specimens. Part of this work was supported by the Theme-based Research Scheme (T12-708/12N)  
1243 and Area of Excellence (AoE/M-04/04) of the Hong Kong Research Grants (RGC) Council  
1244 awarded to KSEC (Project Coordinator and PI) and DC (co-PI), the RGC European Union - Hong  
1245 Kong Research and Innovation Cooperation Co-funding Mechanism (E-HKU703/18) awarded to  
1246 DC, and by the Ministry of Science and Technology of the People's Republic of China: National  
1247 Strategic Basic Research Program ("973") (2014CB942900) awarded to DC. The TAILS analyses  
1248 were supported by a Canadian Institutes of Health Research Foundation Grant FDN-148408 to  
1249 CMO, who holds a Canada Research Chair in Protease Proteomics and Systems Biology.

1250

## 1251 References

- 1252 Anderson, R.M., Lawrence, A.R., Stottmann, R.W., Bachiller, D., and Klingensmith, J. (2002). Chordin  
1253 and noggin promote organizing centers of forebrain development in the mouse. *Development* *129*,  
1254 4975-4987.
- 1255 Barber, R.D., Harmer, D.W., Coleman, R.A., and Clark, B.J. (2005). GAPDH as a housekeeping gene:  
1256 analysis of GAPDH mRNA expression in a panel of 72 human tissues. *Physiol Genomics* *21*, 389-  
1257 395.
- 1258 Bizet, A.A., Liu, K., Tran-Khanh, N., Saksena, A., Vorstenbosch, J., Finnson, K.W., Buschmann, M.D.,  
1259 and Philip, A. (2011). The TGF-beta co-receptor, CD109, promotes internalization and degradation  
1260 of TGF-beta receptors. *Biochim Biophys Acta* *1813*, 742-753.
- 1261 Braschi, B., Denny, P., Gray, K., Jones, T., Seal, R., Tweedie, S., Yates, B., and Bruford, E. (2019).  
1262 Genenames.org: the HGNC and VGNC resources in 2019. *Nucleic Acids Res* *47*, D786-D792.
- 1263 Chang, C.C., and Lin, C.J. (2011). LIBSVM: A Library for Support Vector Machines. *Acm T Intel Syst*  
1264 *Tec* *2*.
- 1265 Chen, J., Yan, W., and Setton, L.A. (2006). Molecular phenotypes of notochordal cells purified from  
1266 immature nucleus pulposus. *Eur Spine J* *15 Suppl* *3*, S303-311.
- 1267 Dong, Y.F., Soung do, Y., Schwarz, E.M., O'Keefe, R.J., and Drissi, H. (2006). Wnt induction of  
1268 chondrocyte hypertrophy through the Runx2 transcription factor. *J Cell Physiol* *208*, 77-86.
- 1269 Feng, H., Danfelter, M., Stromqvist, B., and Heinegard, D. (2006). Extracellular matrix in disc  
1270 degeneration. *J Bone Joint Surg Am* *88 Suppl* *2*, 25-29.
- 1271 Fortelny, N., Overall, C.M., Pavlidis, P., and Freue, G.V.C. (2017). Can we predict protein from mRNA  
1272 levels? *Nature* *547*, E19-E20.
- 1273 Fujita, N., Miyamoto, T., Imai, J., Hosogane, N., Suzuki, T., Yagi, M., Morita, K., Ninomiya, K.,  
1274 Miyamoto, K., Takaishi, H., *et al.* (2005). CD24 is expressed specifically in the nucleus pulposus  
1275 of intervertebral discs. *Biochem Biophys Res Commun* *338*, 1890-1896.
- 1276 Grimsrud, C.D., Romano, P.R., D'Souza, M., Puzas, J.E., Schwarz, E.M., Reynolds, P.R., Roiser, R.N., and  
1277 O'Keefe, R.J. (2001). BMP signaling stimulates chondrocyte maturation and the expression of  
1278 Indian hedgehog. *J Orthop Res* *19*, 18-25.
- 1279 Hiyama, A., Sakai, D., Risbud, M.V., Tanaka, M., Arai, F., Abe, K., and Mochida, J. (2010). Enhancement  
1280 of intervertebral disc cell senescence by WNT/beta-catenin signaling-induced matrix  
1281 metalloproteinase expression. *Arthritis Rheum* *62*, 3036-3047.
- 1282 Hou, G., Lu, H., Chen, M., Yao, H., and Zhao, H. (2014). Oxidative stress participates in age-related  
1283 changes in rat lumbar intervertebral discs. *Arch Gerontol Geriatr* *59*, 665-669.
- 1284 Humzah, M.D., and Soames, R.W. (1988). Human intervertebral disc: structure and function. *Anat Rec*  
1285 *220*, 337-356.
- 1286 Jayasuriya, C.T., Goldring, M.B., Terek, R., and Chen, Q. (2012). Matrilin-3 induction of IL-1 receptor  
1287 antagonist is required for up-regulating collagen II and aggrecan and down-regulating ADAMTS-  
1288 5 gene expression. *Arthritis Res Ther* *14*, R197.
- 1289 Ji, Q., Zheng, Y., Zhang, G., Hu, Y., Fan, X., Hou, Y., Wen, L., Li, L., Xu, Y., Wang, Y., *et al.* (2019).  
1290 Single-cell RNA-seq analysis reveals the progression of human osteoarthritis. *Ann Rheum Dis* *78*,  
1291 100-110.
- 1292 Jim, J.J., Nojonen-Hietala, N., Cheung, K.M., Ott, J., Karppinen, J., Sahraravand, A., Luk, K.D., Yip, S.P.,  
1293 Sham, P.C., Song, Y.Q., *et al.* (2005). The TRP2 allele of COL9A2 is an age-dependent risk factor  
1294 for the development and severity of intervertebral disc degeneration. *Spine (Phila Pa 1976)* *30*,  
1295 2735-2742.
- 1296 Johnson, J.L., Hall, T.E., Dyson, J.M., Sonntag, C., Ayers, K., Berger, S., Gautier, P., Mitchell, C., Hollway,  
1297 G.E., and Currie, P.D. (2012). Scube activity is necessary for Hedgehog signal transduction in vivo.  
1298 *Dev Biol* *368*, 193-202.



- 1299 Kalamajski, S., Bihan, D., Bonna, A., Rubin, K., and Farndale, R.W. (2016). Fibromodulin Interacts with  
1300 Collagen Cross-linking Sites and Activates Lysyl Oxidase. *J Biol Chem* 291, 7951-7960.
- 1301 Kanehisa, M., Sato, Y., Furumichi, M., Morishima, K., and Tanabe, M. (2019). New approach for  
1302 understanding genome variations in KEGG. *Nucleic Acids Res* 47, D590-D595.
- 1303 Kleifeld, O., Doucet, A., auf dem Keller, U., Prudova, A., Schilling, O., Kainthan, R.K., Starr, A.E., Foster,  
1304 L.J., Kizhakkedathu, J.N., and Overall, C.M. (2010). Isotopic labeling of terminal amines in  
1305 complex samples identifies protein N-termini and protease cleavage products. *Nat Biotechnol* 28,  
1306 281-288.
- 1307 Komori, T. (2010). Regulation of bone development and extracellular matrix protein genes by RUNX2.  
1308 *Cell Tissue Res* 339, 189-195.
- 1309 Lam, T.-k. (2013). Fate of notochord descendent cells in the intervertebral disc. In HKU Theses Online  
1310 (HKUTO) (The University of Hong Kong (Pokfulam, Hong Kong)).
- 1311 Lau, D., Elezagic, D., Hermes, G., Morgelin, M., Wohl, A.P., Koch, M., Hartmann, U., Hollriegel, S.,  
1312 Wagener, R., Paulsson, M., *et al.* (2018). The cartilage-specific lectin C-type lectin domain family  
1313 3 member A (CLEC3A) enhances tissue plasminogen activator-mediated plasminogen activation.  
1314 *J Biol Chem* 293, 203-214.
- 1315 Lee, C.G., Da Silva, C.A., Dela Cruz, C.S., Ahangari, F., Ma, B., Kang, M.J., He, C.H., Takyar, S., and  
1316 Elias, J.A. (2011). Role of chitin and chitinase/chitinase-like proteins in inflammation, tissue  
1317 remodeling, and injury. *Annu Rev Physiol* 73, 479-501.
- 1318 Leijten, J.C., Bos, S.D., Landman, E.B., Georgi, N., Jahr, H., Meulenbelt, I., Post, J.N., van Blitterswijk,  
1319 C.A., and Karperien, M. (2013). GREM1, FRZB and DKK1 mRNA levels correlate with  
1320 osteoarthritis and are regulated by osteoarthritis-associated factors. *Arthritis Res Ther* 15, R126.
- 1321 Li, C., Hancock, M.A., Sehgal, P., Zhou, S., Reinhardt, D.P., and Philip, A. (2016). Soluble CD109 binds  
1322 TGF-beta and antagonizes TGF-beta signalling and responses. *Biochem J* 473, 537-547.
- 1323 Lopez-Otin, C., and Overall, C.M. (2002). Protease degradomics: a new challenge for proteomics. *Nat Rev*  
1324 *Mol Cell Biol* 3, 509-519.
- 1325 Lu, Y., Qiao, L., Lei, G., Mira, R.R., Gu, J., and Zheng, Q. (2014). Col10a1 gene expression and  
1326 chondrocyte hypertrophy during skeletal development and disease. *Frontiers in Biology* 9, 195-  
1327 204.
- 1328 Markmann, A., Hausser, H., Schonherr, E., and Kresse, H. (2000). Influence of decorin expression on  
1329 transforming growth factor-beta-mediated collagen gel retraction and biglycan induction. *Matrix*  
1330 *Biol* 19, 631-636.
- 1331 Maseda, M., Yamaguchi, H., Kuroda, K., Mitsumata, M., Tokuhashi, Y., and Esumi, M. (2016). Proteomic  
1332 Analysis of Human Intervertebral Disc Degeneration. *Journal of Nihon University Medical*  
1333 *Association* 75, 16-21.
- 1334 Melas, I.N., Chairakaki, A.D., Chatzopoulou, E.I., Messinis, D.E., Katopodi, T., Pliaka, V., Samara, S.,  
1335 Mitsos, A., Dailiana, Z., Kollia, P., *et al.* (2014). Modeling of signaling pathways in chondrocytes  
1336 based on phosphoproteomic and cytokine release data. *Osteoarthritis Cartilage* 22, 509-518.
- 1337 Minogue, B.M., Richardson, S.M., Zeef, L.A., Freemont, A.J., and Hoyland, J.A. (2010). Characterization  
1338 of the human nucleus pulposus cell phenotype and evaluation of novel marker gene expression to  
1339 define adult stem cell differentiation. *Arthritis Rheum* 62, 3695-3705.
- 1340 Molinos, M., Almeida, C.R., Caldeira, J., Cunha, C., Goncalves, R.M., and Barbosa, M.A. (2015).  
1341 Inflammation in intervertebral disc degeneration and regeneration. *J R Soc Interface* 12, 20150429.
- 1342 Munir, S., Rade, M., Maatta, J.H., Freidin, M.B., and Williams, F.M.K. (2018). Intervertebral Disc Biology:  
1343 Genetic Basis of Disc Degeneration. *Curr Mol Biol Rep* 4, 143-150.
- 1344 Naba, A., Clauser, K.R., Hoersch, S., Liu, H., Carr, S.A., and Hynes, R.O. (2012). The matrisome: in silico  
1345 definition and in vivo characterization by proteomics of normal and tumor extracellular matrices.  
1346 *Mol Cell Proteomics* 11, M111 014647.
- 1347 Nakai, T., Sakai, D., Nakamura, Y., Nukaga, T., Grad, S., Li, Z., Alini, M., Chan, D., Masuda, K., Ando,  
1348 K., *et al.* (2016). CD146 defines commitment of cultured annulus fibrosus cells to express a  
1349 contractile phenotype. *J Orthop Res* 34, 1361-1372.

- 1350 Nakamichi, R., Kataoka, K., and Asahara, H. (2018). Essential role of Mohawk for tenogenic tissue  
1351 homeostasis including spinal disc and periodontal ligament. *Mod Rheumatol* 28, 933-940.
- 1352 Naveau, S., Poynard, T., Benattar, C., Bedossa, P., and Chaput, J.C. (1994). Alpha-2-macroglobulin and  
1353 hepatic fibrosis. Diagnostic interest. *Dig Dis Sci* 39, 2426-2432.
- 1354 Nerlich, A.G., Schaaf, R., Walchli, B., and Boos, N. (2007). Temporo-spatial distribution of blood vessels  
1355 in human lumbar intervertebral discs. *Eur Spine J* 16, 547-555.
- 1356 Newell, N., Little, J.P., Christou, A., Adams, M.A., Adam, C.J., and Masouros, S.D. (2017). Biomechanics  
1357 of the human intervertebral disc: A review of testing techniques and results. *J Mech Behav Biomed*  
1358 *Mater* 69, 420-434.
- 1359 Ong, S.E., Blagoev, B., Kratchmarova, I., Kristensen, D.B., Steen, H., Pandey, A., and Mann, M. (2002).  
1360 Stable isotope labeling by amino acids in cell culture, SILAC, as a simple and accurate approach  
1361 to expression proteomics. *Mol Cell Proteomics* 1, 376-386.
- 1362 Onnerfjord, P., Khabut, A., Reinholt, F.P., Svensson, O., and Heinegard, D. (2012a). Quantitative  
1363 proteomic analysis of eight cartilaginous tissues reveals characteristic differences as well as  
1364 similarities between subgroups. *J Biol Chem* 287, 18913-18924.
- 1365 Onnerfjord, P., Khabut, A., Reinholt, F.P., Svensson, O., and Heinegard, D. (2012b). Quantitative  
1366 proteomic analysis of eight cartilaginous tissues reveals characteristic differences as well as  
1367 similarities between subgroups. *Journal of Biological Chemistry* 287, 18913-18924.
- 1368 Park, J.S., Chu, J.S., Tsou, A.D., Diop, R., Tang, Z., Wang, A., and Li, S. (2011). The effect of matrix  
1369 stiffness on the differentiation of mesenchymal stem cells in response to TGF-beta. *Biomaterials*  
1370 32, 3921-3930.
- 1371 Peix, L., Evans, I.C., Pearce, D.R., Simpson, J.K., Maher, T.M., and McAnulty, R.J. (2018). Diverse  
1372 functions of clusterin promote and protect against the development of pulmonary fibrosis. *Sci Rep*  
1373 8, 1906.
- 1374 Pfirrmann, C.W., Metzdorf, A., Zanetti, M., Hodler, J., and Boos, N. (2001). Magnetic resonance  
1375 classification of lumbar intervertebral disc degeneration. *Spine (Phila Pa 1976)* 26, 1873-1878.
- 1376 Rajasekaran, S., Tangavel, C., K, S.S., Soundararajan, D.C.R., Nayagam, S.M., Matchado, M.S.,  
1377 Raveendran, M., Shetty, A.P., Kanna, R.M., and Dharmalingam, K. (2020). Inflammaging  
1378 determines health and disease in lumbar discs-evidence from differing proteomic signatures of  
1379 healthy, aging, and degenerating discs. *Spine J* 20, 48-59.
- 1380 Rajesh, D., and Dahia, C.L. (2018). Role of Sonic Hedgehog Signaling Pathway in Intervertebral Disc  
1381 Formation and Maintenance. *Curr Mol Biol Rep* 4, 173-179.
- 1382 Ranjani, V., Sreemol, G., Muthurajan, R., Natesan, S., Gnanam, R., Kanna, R.M., and Rajasekaran, S.  
1383 (2016). Proteomic Analysis of Degenerated Intervertebral Disc-identification of Biomarkers of  
1384 Degenerative Disc Disease and Development of Proteome Database. *Global Spine Journal* 6,  
1385 WO025.
- 1386 Rauniyar, N., and Yates, J.R., 3rd (2014). Isobaric labeling-based relative quantification in shotgun  
1387 proteomics. *J Proteome Res* 13, 5293-5309.
- 1388 Riester, S.M., Lin, Y., Wang, W., Cong, L., Mohamed Ali, A.M., Peck, S.H., Smith, L.J., Currier, B.L.,  
1389 Clark, M., Huddleston, P., *et al.* (2018). RNA sequencing identifies gene regulatory networks  
1390 controlling extracellular matrix synthesis in intervertebral disk tissues. *J Orthop Res* 36, 1356-1369.
- 1391 Risbud, M.V., Schoepflin, Z.R., Mwale, F., Kandel, R.A., Grad, S., Iatridis, J.C., Sakai, D., and Hoyland,  
1392 J.A. (2015). Defining the phenotype of young healthy nucleus pulposus cells: recommendations of  
1393 the Spine Research Interest Group at the 2014 annual ORS meeting. *J Orthop Res* 33, 283-293.
- 1394 Robinson, K.A., Sun, M., Barnum, C.E., Weiss, S.N., Huegel, J., Shetye, S.S., Lin, L., Saez, D., Adams,  
1395 S.M., Iozzo, R.V., *et al.* (2017). Decorin and biglycan are necessary for maintaining collagen fibril  
1396 structure, fiber realignment, and mechanical properties of mature tendons. *Matrix Biol* 64, 81-93.
- 1397 Rodrigues-Pinto, R., Berry, A., Piper-Hanley, K., Hanley, N., Richardson, S.M., and Hoyland, J.A. (2016).  
1398 Spatiotemporal analysis of putative notochordal cell markers reveals CD24 and keratins 8, 18, and  
1399 19 as notochord-specific markers during early human intervertebral disc development. *J Orthop*  
1400 *Res* 34, 1327-1340.

- 1401 Rodriguez, A.G., Slichter, C.K., Acosta, F.L., Rodriguez-Soto, A.E., Burghardt, A.J., Majumdar, S., and  
1402 Lotz, J.C. (2011). Human disc nucleus properties and vertebral endplate permeability. *Spine (Phila*  
1403 *Pa 1976)* 36, 512-520.
- 1404 Rubin, D.I. (2007). Epidemiology and risk factors for spine pain. *Neurol Clin* 25, 353-371.
- 1405 Rutges, J.P., Duit, R.A., Kummer, J.A., Oner, F.C., van Rijen, M.H., Verbout, A.J., Castelein, R.M., Dhert,  
1406 W.J., and Creemers, L.B. (2010). Hypertrophic differentiation and calcification during  
1407 intervertebral disc degeneration. *Osteoarthritis Cartilage* 18, 1487-1495.
- 1408 Saito, T., Ikeda, T., Nakamura, K., Chung, U.I., and Kawaguchi, H. (2007). S100A1 and S100B,  
1409 transcriptional targets of SOX trio, inhibit terminal differentiation of chondrocytes. *EMBO Rep* 8,  
1410 504-509.
- 1411 Sakai, D., Nakamura, Y., Nakai, T., Mishima, T., Kato, S., Grad, S., Alini, M., Risbud, M.V., Chan, D.,  
1412 Cheah, K.S., *et al.* (2012). Exhaustion of nucleus pulposus progenitor cells with ageing and  
1413 degeneration of the intervertebral disc. *Nat Commun* 3, 1264.
- 1414 Saleem, S., Aslam, H.M., Rehmani, M.A., Raees, A., Alvi, A.A., and Ashraf, J. (2013). Lumbar disc  
1415 degenerative disease: disc degeneration symptoms and magnetic resonance image findings. *Asian*  
1416 *Spine J* 7, 322-334.
- 1417 Sarath Babu, N., Krishnan, S., Brahmendra Swamy, C.V., Venkata Subbaiah, G.P., Gurava Reddy, A.V.,  
1418 and Idris, M.M. (2016). Quantitative proteomic analysis of normal and degenerated human  
1419 intervertebral disc. *Spine J* 16, 989-1000.
- 1420 Schneiderman, G., Flannigan, B., Kingston, S., Thomas, J., Dillin, W.H., and Watkins, R.G. (1987).  
1421 Magnetic resonance imaging in the diagnosis of disc degeneration: correlation with discography.  
1422 *Spine (Phila Pa 1976)* 12, 276-281.
- 1423 Silagi, E.S., Shapiro, I.M., and Risbud, M.V. (2018). Glycosaminoglycan synthesis in the nucleus pulposus:  
1424 Dysregulation and the pathogenesis of disc degeneration. *Matrix Biol* 71-72, 368-379.
- 1425 Song, Y.Q., Cheung, K.M., Ho, D.W., Poon, S.C., Chiba, K., Kawaguchi, Y., Hirose, Y., Alini, M., Grad,  
1426 S., Yee, A.F., *et al.* (2008). Association of the asporin D14 allele with lumbar-disc degeneration in  
1427 Asians. *Am J Hum Genet* 82, 744-747.
- 1428 Song, Y.Q., Karasugi, T., Cheung, K.M., Chiba, K., Ho, D.W., Miyake, A., Kao, P.Y., Sze, K.L., Yee, A.,  
1429 Takahashi, A., *et al.* (2013). Lumbar disc degeneration is linked to a carbohydrate sulfotransferase  
1430 3 variant. *J Clin Invest* 123, 4909-4917.
- 1431 Subramanian, A., and Schilling, T.F. (2014). Thrombospondin-4 controls matrix assembly during  
1432 development and repair of myotendinous junctions. *Elife* 3.
- 1433 Subramanian, A., Tamayo, P., Mootha, V.K., Mukherjee, S., Ebert, B.L., Gillette, M.A., Paulovich, A.,  
1434 Pomeroy, S.L., Golub, T.R., Lander, E.S., *et al.* (2005). Gene set enrichment analysis: a knowledge-  
1435 based approach for interpreting genome-wide expression profiles. *Proc Natl Acad Sci U S A* 102,  
1436 15545-15550.
- 1437 Sun, Z., Liu, B., and Luo, Z.J. (2020). The Immune Privilege of the Intervertebral Disc: Implications for  
1438 Intervertebral Disc Degeneration Treatment. *Int J Med Sci* 17, 685-692.
- 1439 Taha, I.N., and Naba, A. (2019). Exploring the extracellular matrix in health and disease using proteomics.  
1440 *Essays Biochem* 63, 417-432.
- 1441 Takao, T., and Iwaki, T. (2002). A comparative study of localization of heat shock protein 27 and heat  
1442 shock protein 72 in the developmental and degenerative intervertebral discs. *Spine (Phila Pa 1976)*  
1443 27, 361-368.
- 1444 Taye, N., Karoulias, S.Z., and Hubmacher, D. (2020). The "other" 15-40%: The Role of Non-Collagenous  
1445 Extracellular Matrix Proteins and Minor Collagens in Tendon. *J Orthop Res* 38, 23-35.
- 1446 Team, R.C. (2013). R: A language and environment for statistical computing.
- 1447 Teraguchi, M., Yoshimura, N., Hashizume, H., Muraki, S., Yamada, H., Minamide, A., Oka, H., Ishimoto,  
1448 Y., Nagata, K., Kagotani, R., *et al.* (2014). Prevalence and distribution of intervertebral disc  
1449 degeneration over the entire spine in a population-based cohort: the Wakayama Spine Study.  
1450 *Osteoarthritis Cartilage* 22, 104-110.
- 1451 Tibshirani, R. (1996). Regression shrinkage and selection via the Lasso. *J Roy Stat Soc B Met* 58, 267-288.

- 1452 Trougakos, I.P. (2013). The molecular chaperone apolipoprotein J/clusterin as a sensor of oxidative stress:  
1453 implications in therapeutic approaches - a mini-review. *Gerontology* 59, 514-523.
- 1454 Urban, J.P., Smith, S., and Fairbank, J.C. (2004). Nutrition of the intervertebral disc. *Spine (Phila Pa 1976)*  
1455 29, 2700-2709.
- 1456 van Buuren, S., and Groothuis-Oudshoorn, K. (2011). mice: Multivariate Imputation by Chained Equations  
1457 in R. *J Stat Softw* 45, 1-67.
- 1458 van den Akker, G.G.H., Koenders, M.I., van de Loo, F.A.J., van Lent, P., Blaney Davidson, E., and van der  
1459 Kraan, P.M. (2017). Transcriptional profiling distinguishes inner and outer annulus fibrosus from  
1460 nucleus pulposus in the bovine intervertebral disc. *Eur Spine J* 26, 2053-2062.
- 1461 van der Kraan, P.M., and van den Berg, W.B. (2012). Chondrocyte hypertrophy and osteoarthritis: role in  
1462 initiation and progression of cartilage degeneration? *Osteoarthritis Cartilage* 20, 223-232.
- 1463 Vaquerizas, J.M., Kummerfeld, S.K., Teichmann, S.A., and Luscombe, N.M. (2009). A census of human  
1464 transcription factors: function, expression and evolution. *Nat Rev Genet* 10, 252-263.
- 1465 Veras, M.A., McCann, M.R., Tenn, N.A., and Seguin, C.A. (2020). Transcriptional profiling of the murine  
1466 intervertebral disc and age-associated changes in the nucleus pulposus. *Connect Tissue Res* 61, 63-  
1467 81.
- 1468 Vizcaino, J.A., Csordas, A., del-Toro, N., Dianas, J.A., Griss, J., Lavidas, I., Mayer, G., Perez-Riverol, Y.,  
1469 Reisinger, F., Ternent, T., *et al.* (2016). 2016 update of the PRIDE database and its related tools.  
1470 *Nucleic Acids Res* 44, D447-456.
- 1471 Wang, X.L., Hou, L., Zhao, C.G., Tang, Y., Zhang, B., Zhao, J.Y., and Wu, Y.B. (2019a). Screening of  
1472 genes involved in epithelial-mesenchymal transition and differential expression of complement-  
1473 related genes induced by PAX2 in renal tubules. *Nephrology (Carlton)* 24, 263-271.
- 1474 Wang, Y., Fan, X., Xing, L., and Tian, F. (2019b). Wnt signaling: a promising target for osteoarthritis  
1475 therapy. *Cell Commun Signal* 17, 97.
- 1476 Wisniewski, J.R., Hein, M.Y., Cox, J., and Mann, M. (2014). A "proteomic ruler" for protein copy number  
1477 and concentration estimation without spike-in standards. *Mol Cell Proteomics* 13, 3497-3506.
- 1478 Wuertz, K., Vo, N., Kletsas, D., and Boos, N. (2012). Inflammatory and catabolic signalling in  
1479 intervertebral discs: the roles of NF-kappaB and MAP kinases. *Eur Cell Mater* 23, 103-119;  
1480 discussion 119-120.
- 1481 Wyatt, A.R., Yerbury, J.J., and Wilson, M.R. (2009). Structural characterization of clusterin-chaperone  
1482 client protein complexes. *J Biol Chem* 284, 21920-21927.
- 1483 Yates, B., Braschi, B., Gray, K.A., Seal, R.L., Tweedie, S., and Bruford, E.A. (2017). Genenames.org: the  
1484 HGNC and VGNC resources in 2017. *Nucleic Acids Res* 45, D619-D625.
- 1485 Yee, A., Lam, M.P., Tam, V., Chan, W.C., Chu, I.K., Cheah, K.S., Cheung, K.M., and Chan, D. (2016).  
1486 Fibrotic-like changes in degenerate human intervertebral discs revealed by quantitative proteomic  
1487 analysis. *Osteoarthritis Cartilage* 24, 503-513.
- 1488 Zhu, M., Tang, D., Wu, Q., Hao, S., Chen, M., Xie, C., Rosier, R.N., O'Keefe, R.J., Zuscik, M., and Chen,  
1489 D. (2009). Activation of beta-catenin signaling in articular chondrocytes leads to osteoarthritis-like  
1490 phenotype in adult beta-catenin conditional activation mice. *J Bone Miner Res* 24, 12-21.
- 1491 Zhu, S., Qiu, H., Bennett, S., Kuek, V., Rosen, V., Xu, H., and Xu, J. (2019). Chondromodulin-1 in health,  
1492 osteoarthritis, cancer, and heart disease. *Cell Mol Life Sci* 76, 4493-4502.
- 1493



**FIGURE 1**

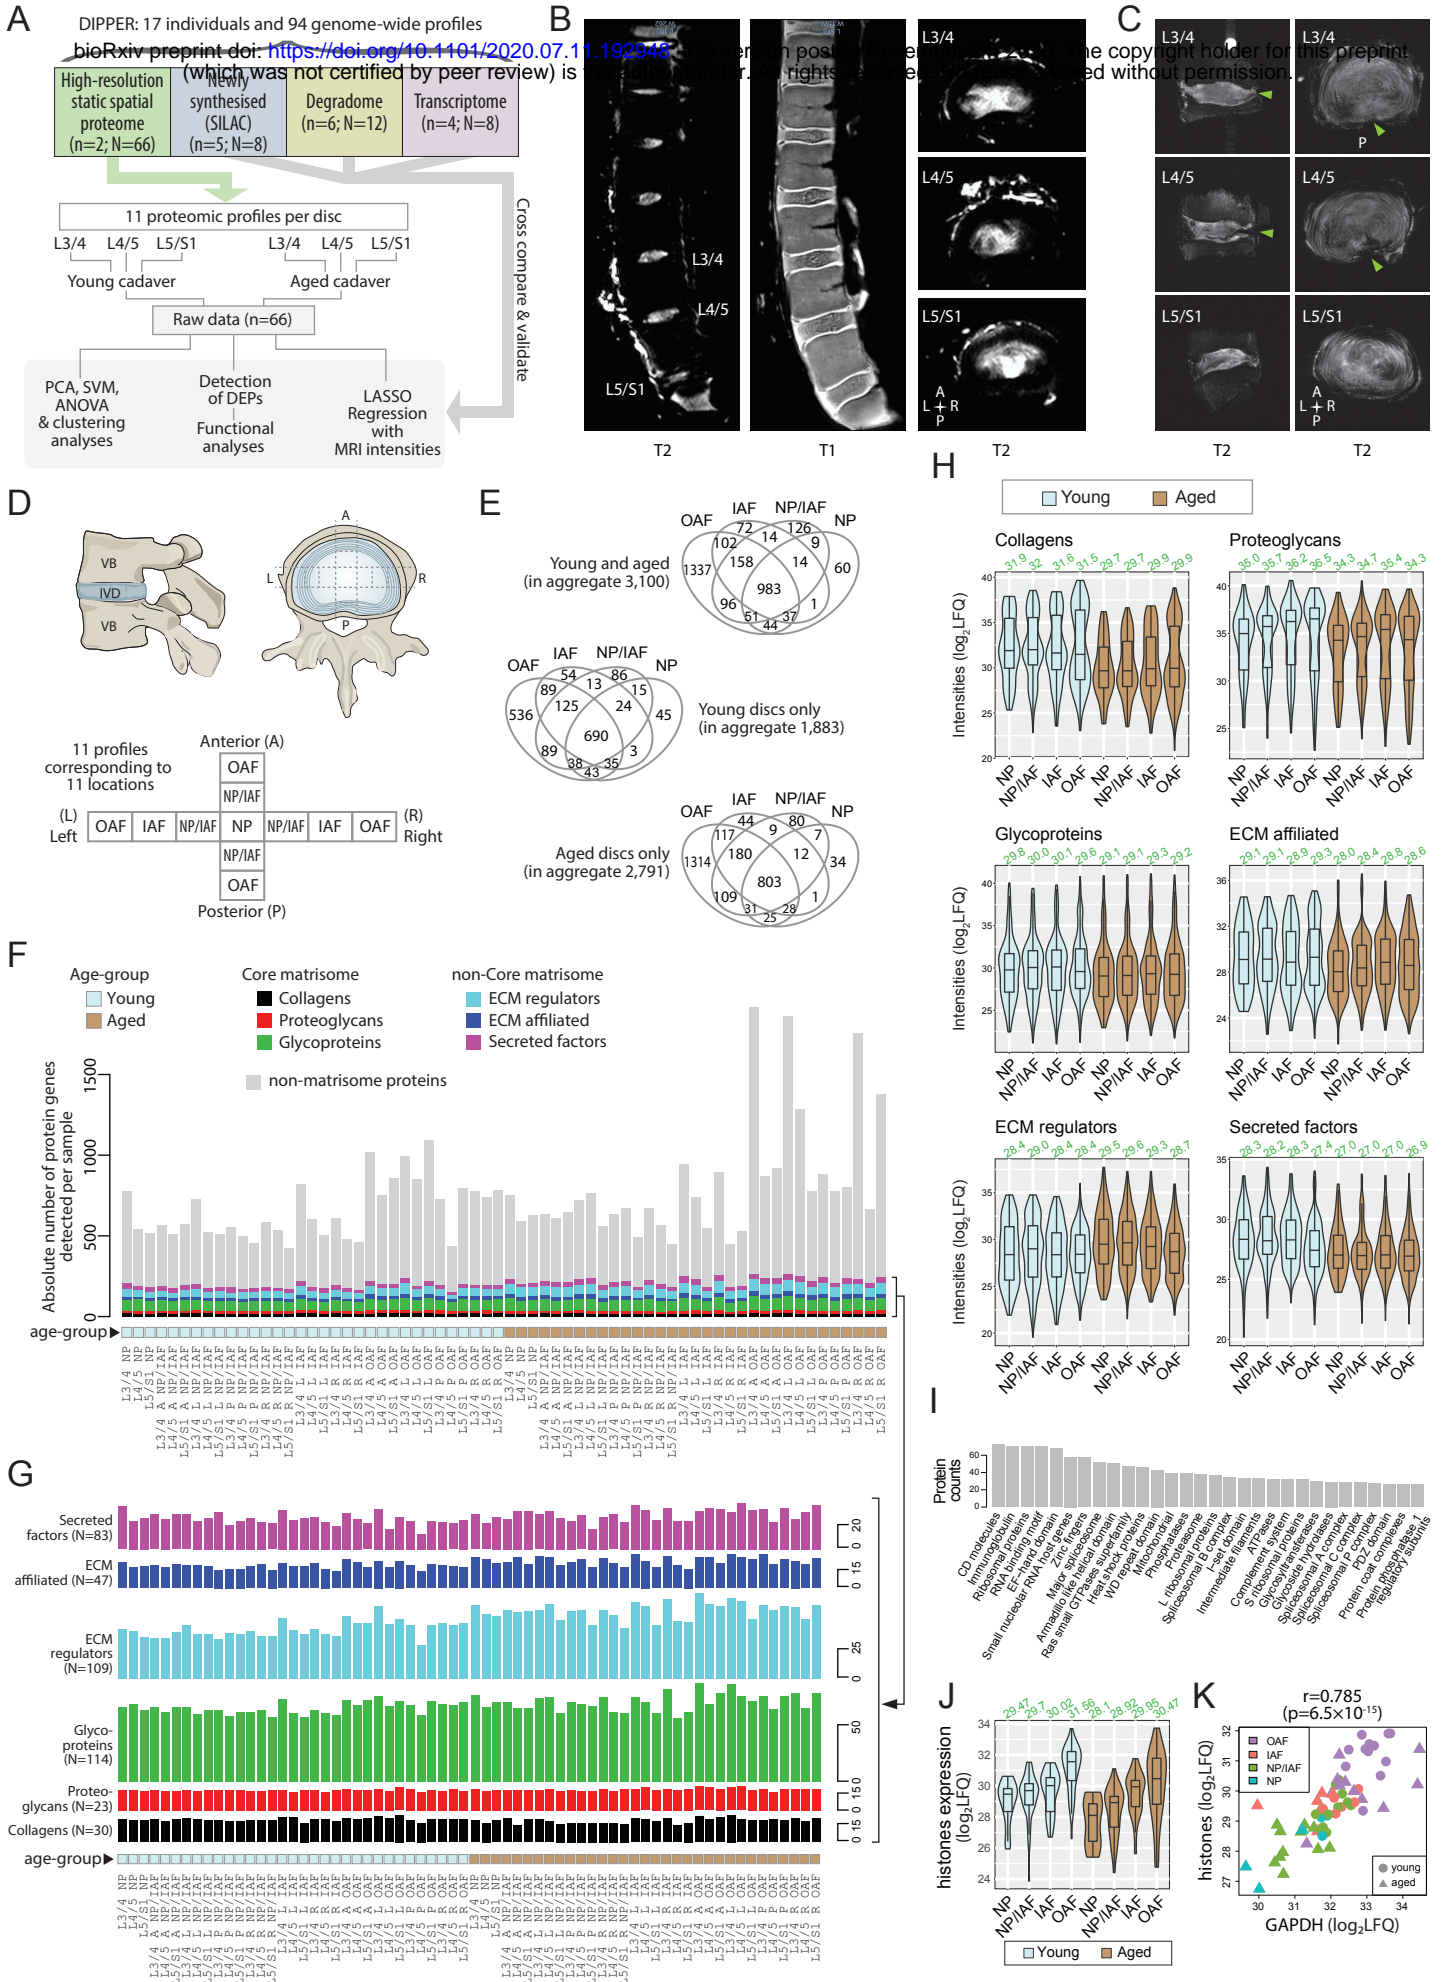

FIGURE 2

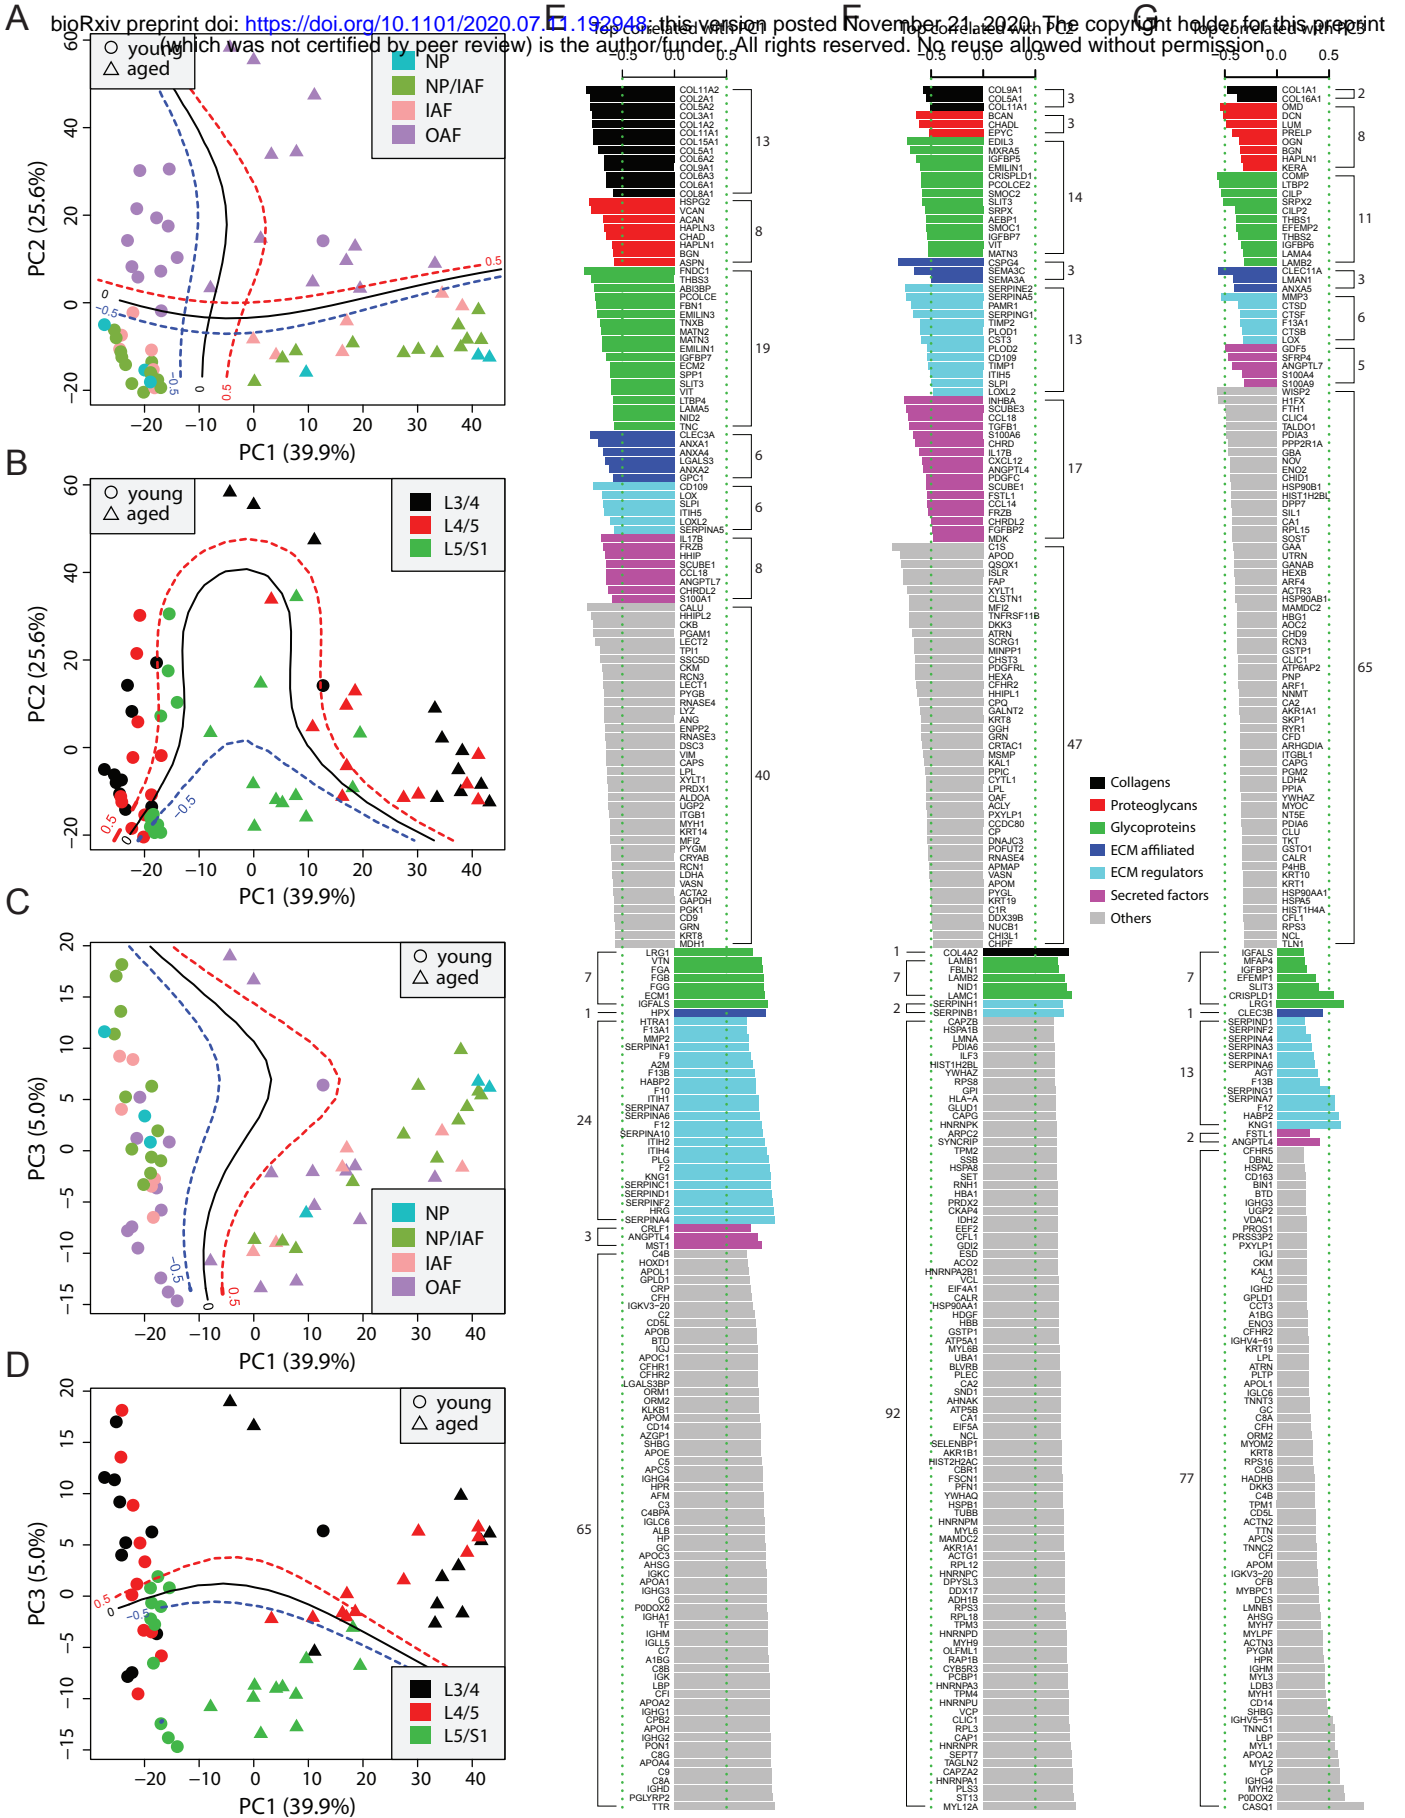

**FIGURE 3**

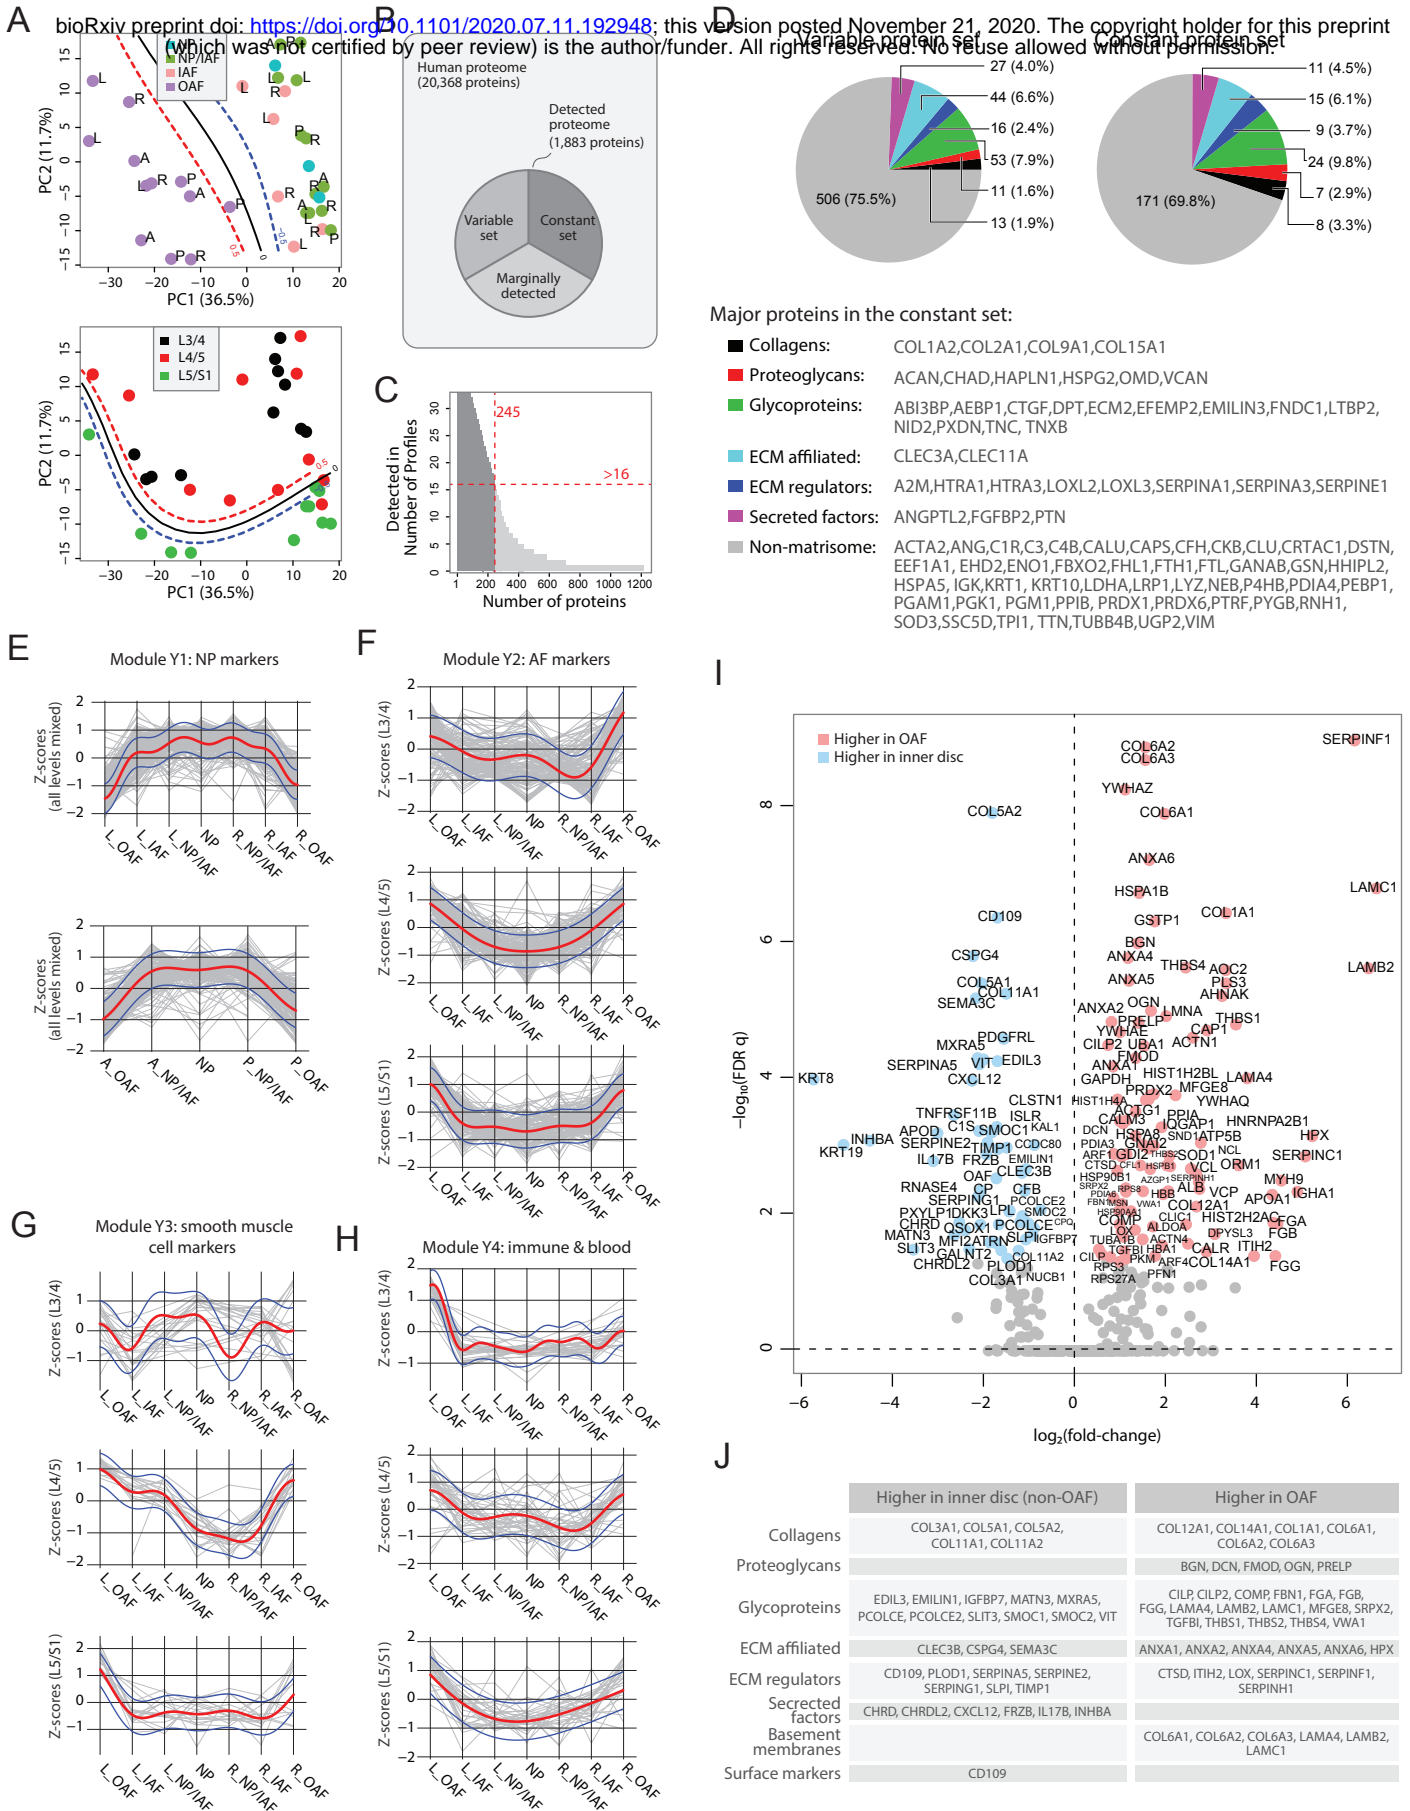



**FIGURE 4**

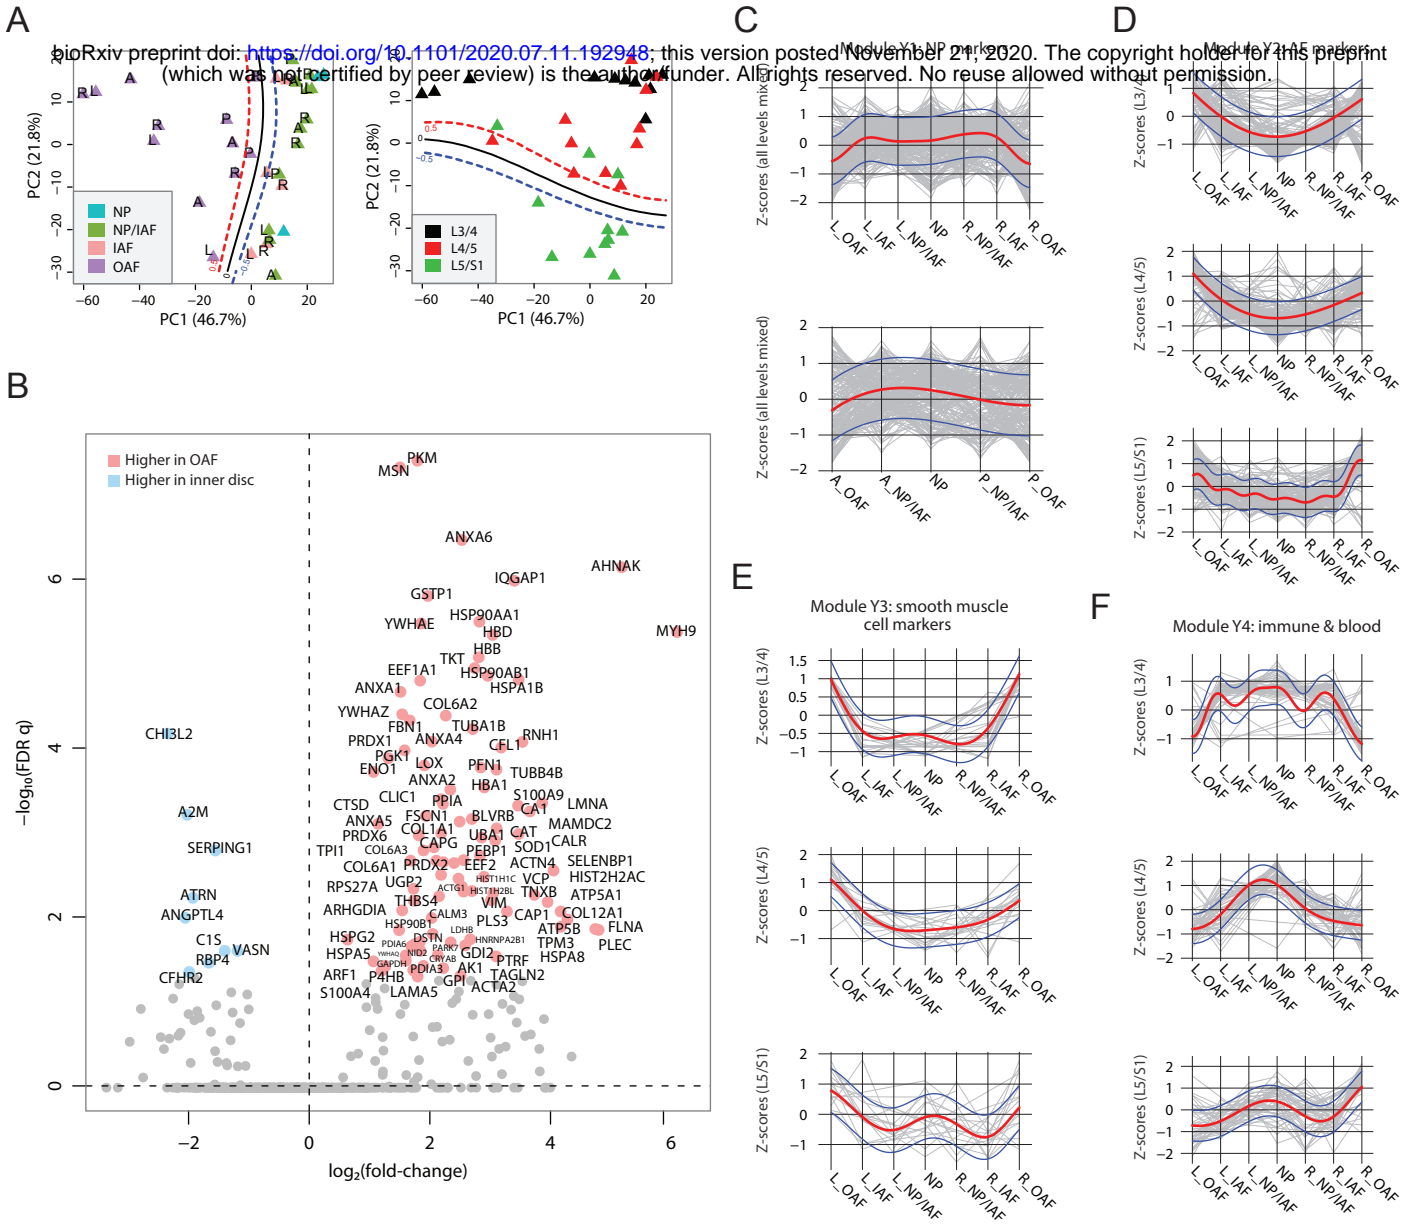

**FIGURE 5**

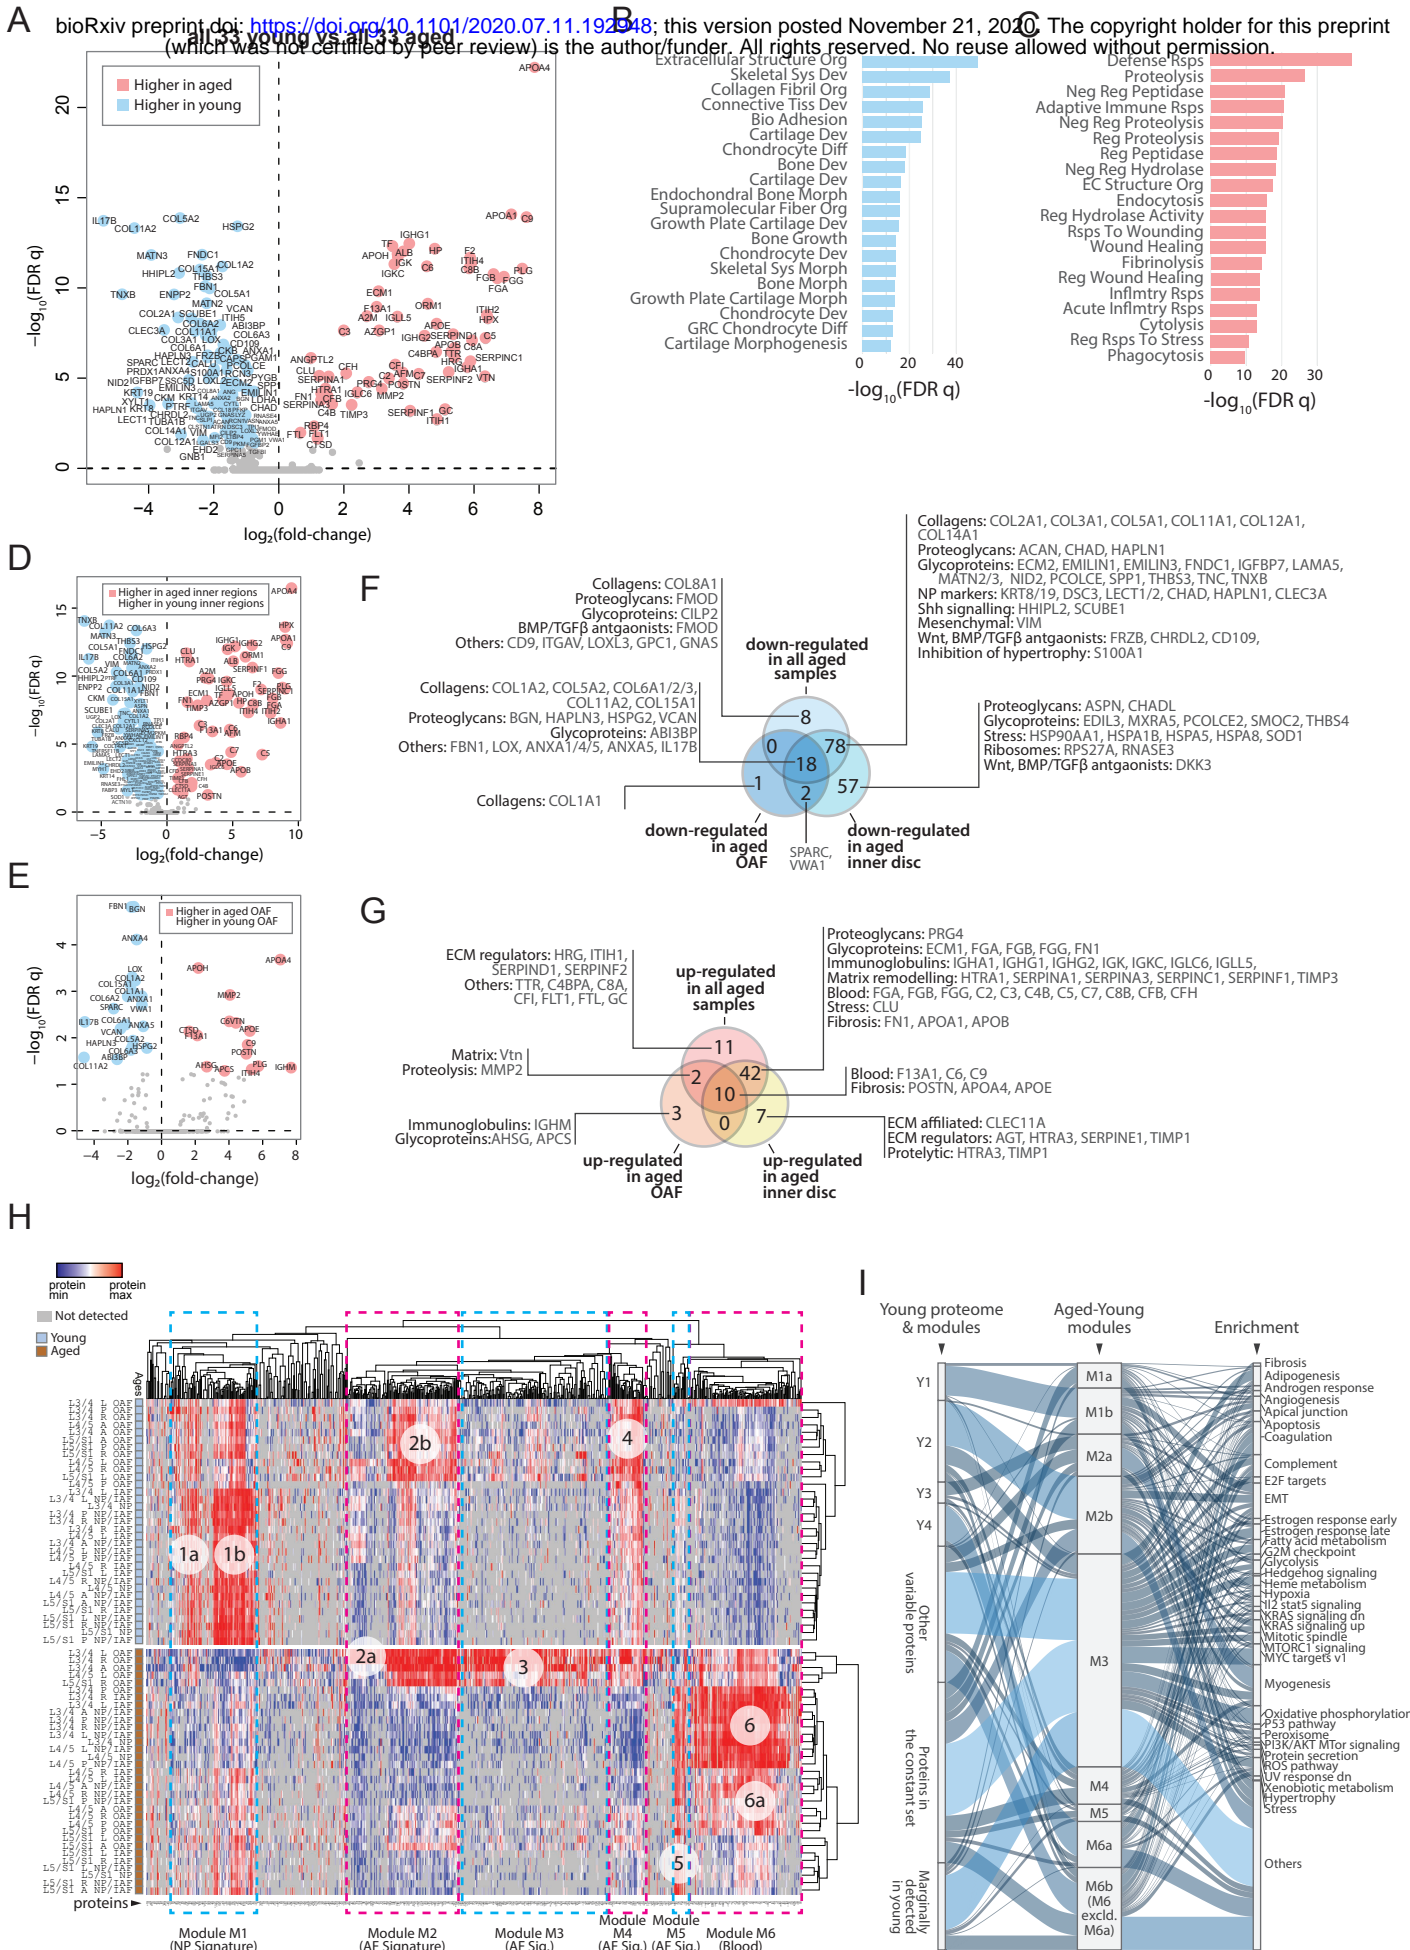

**FIGURE 6**

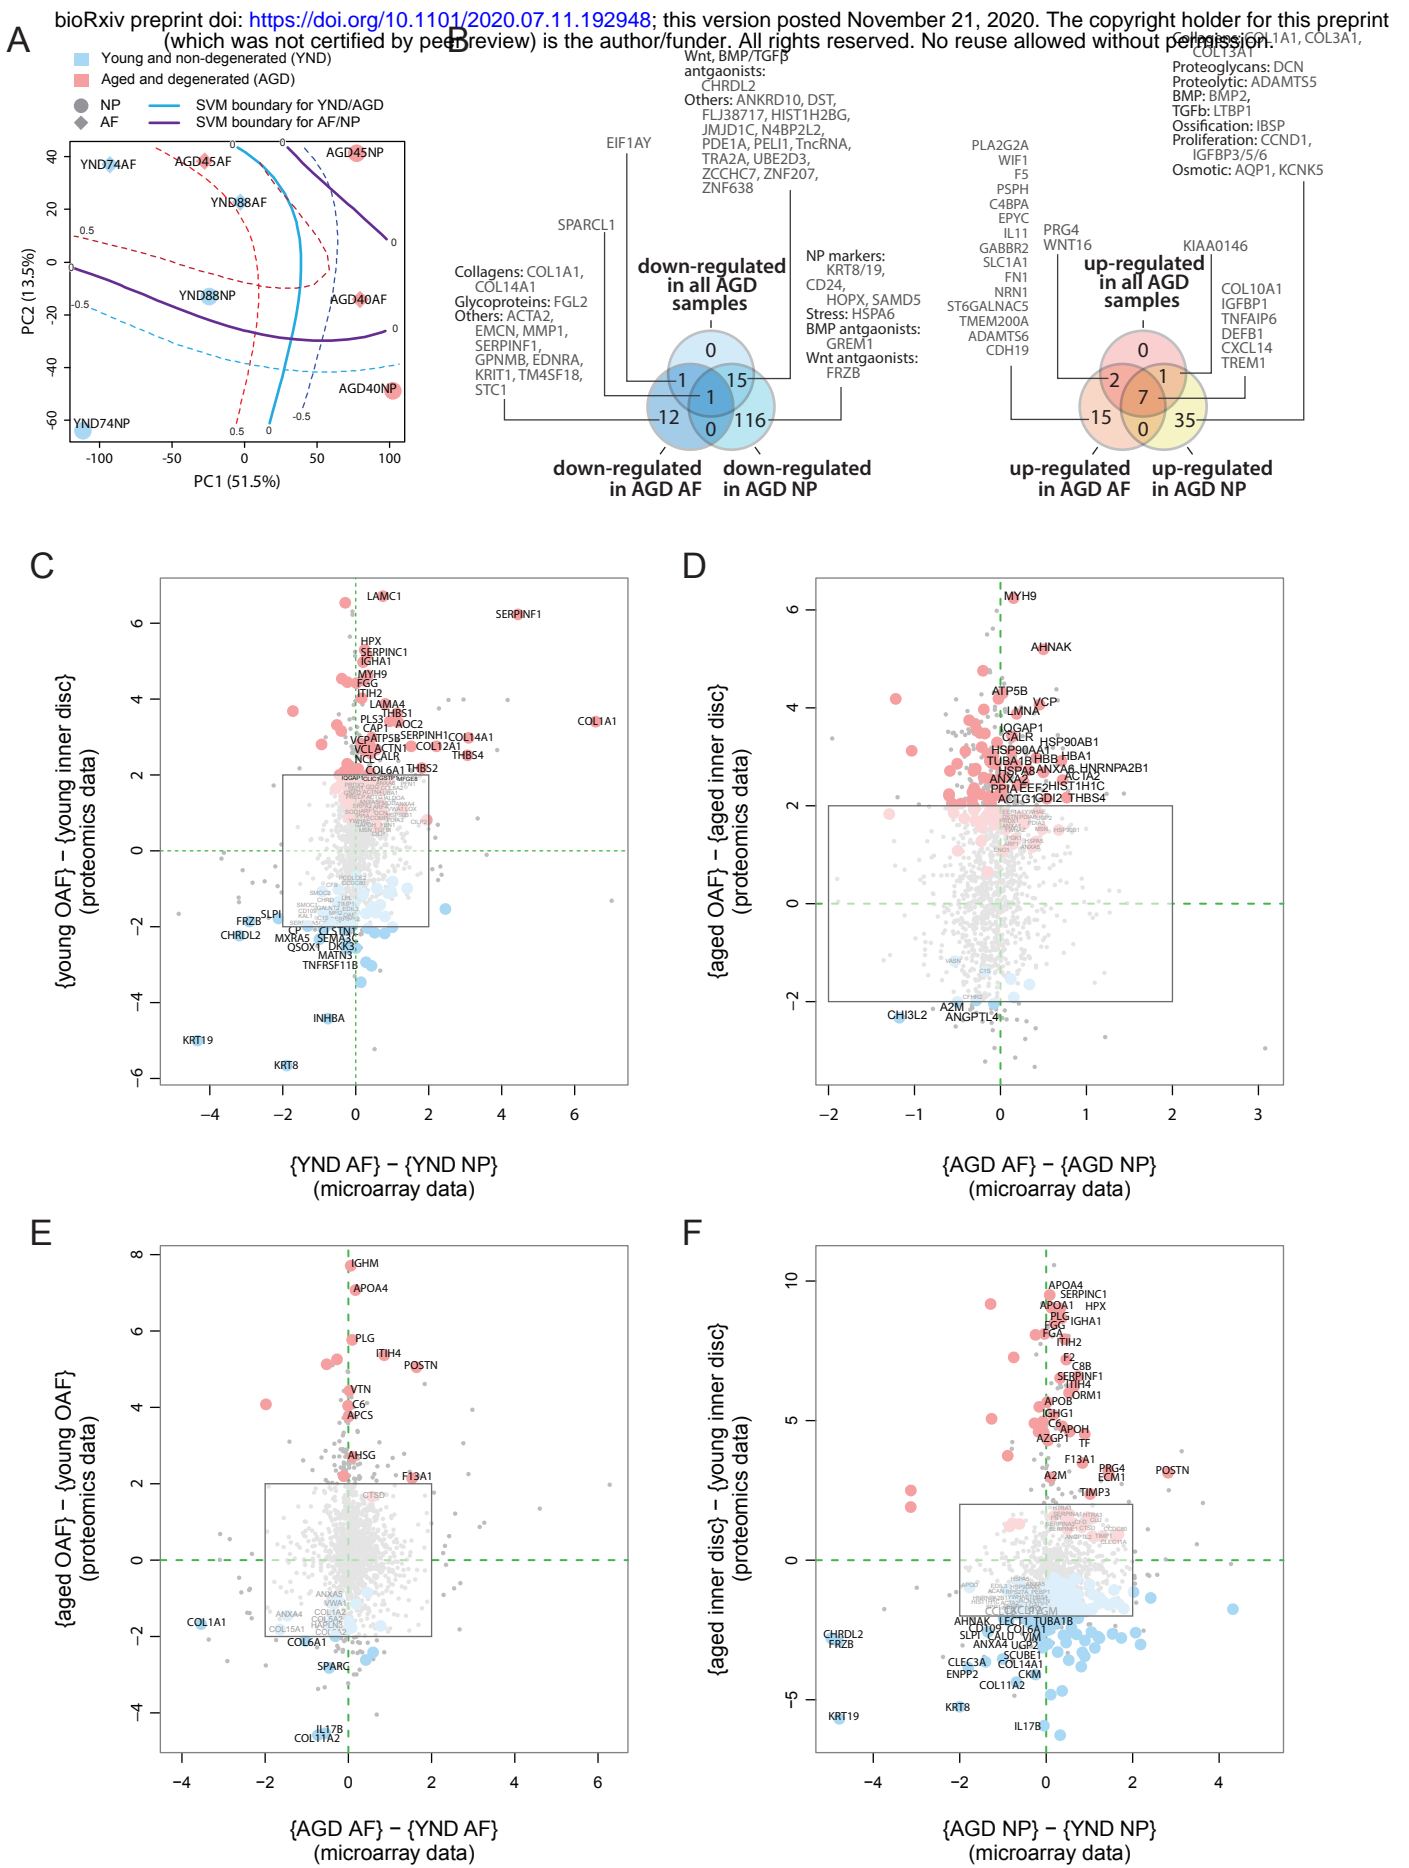

**FIGURE 7**

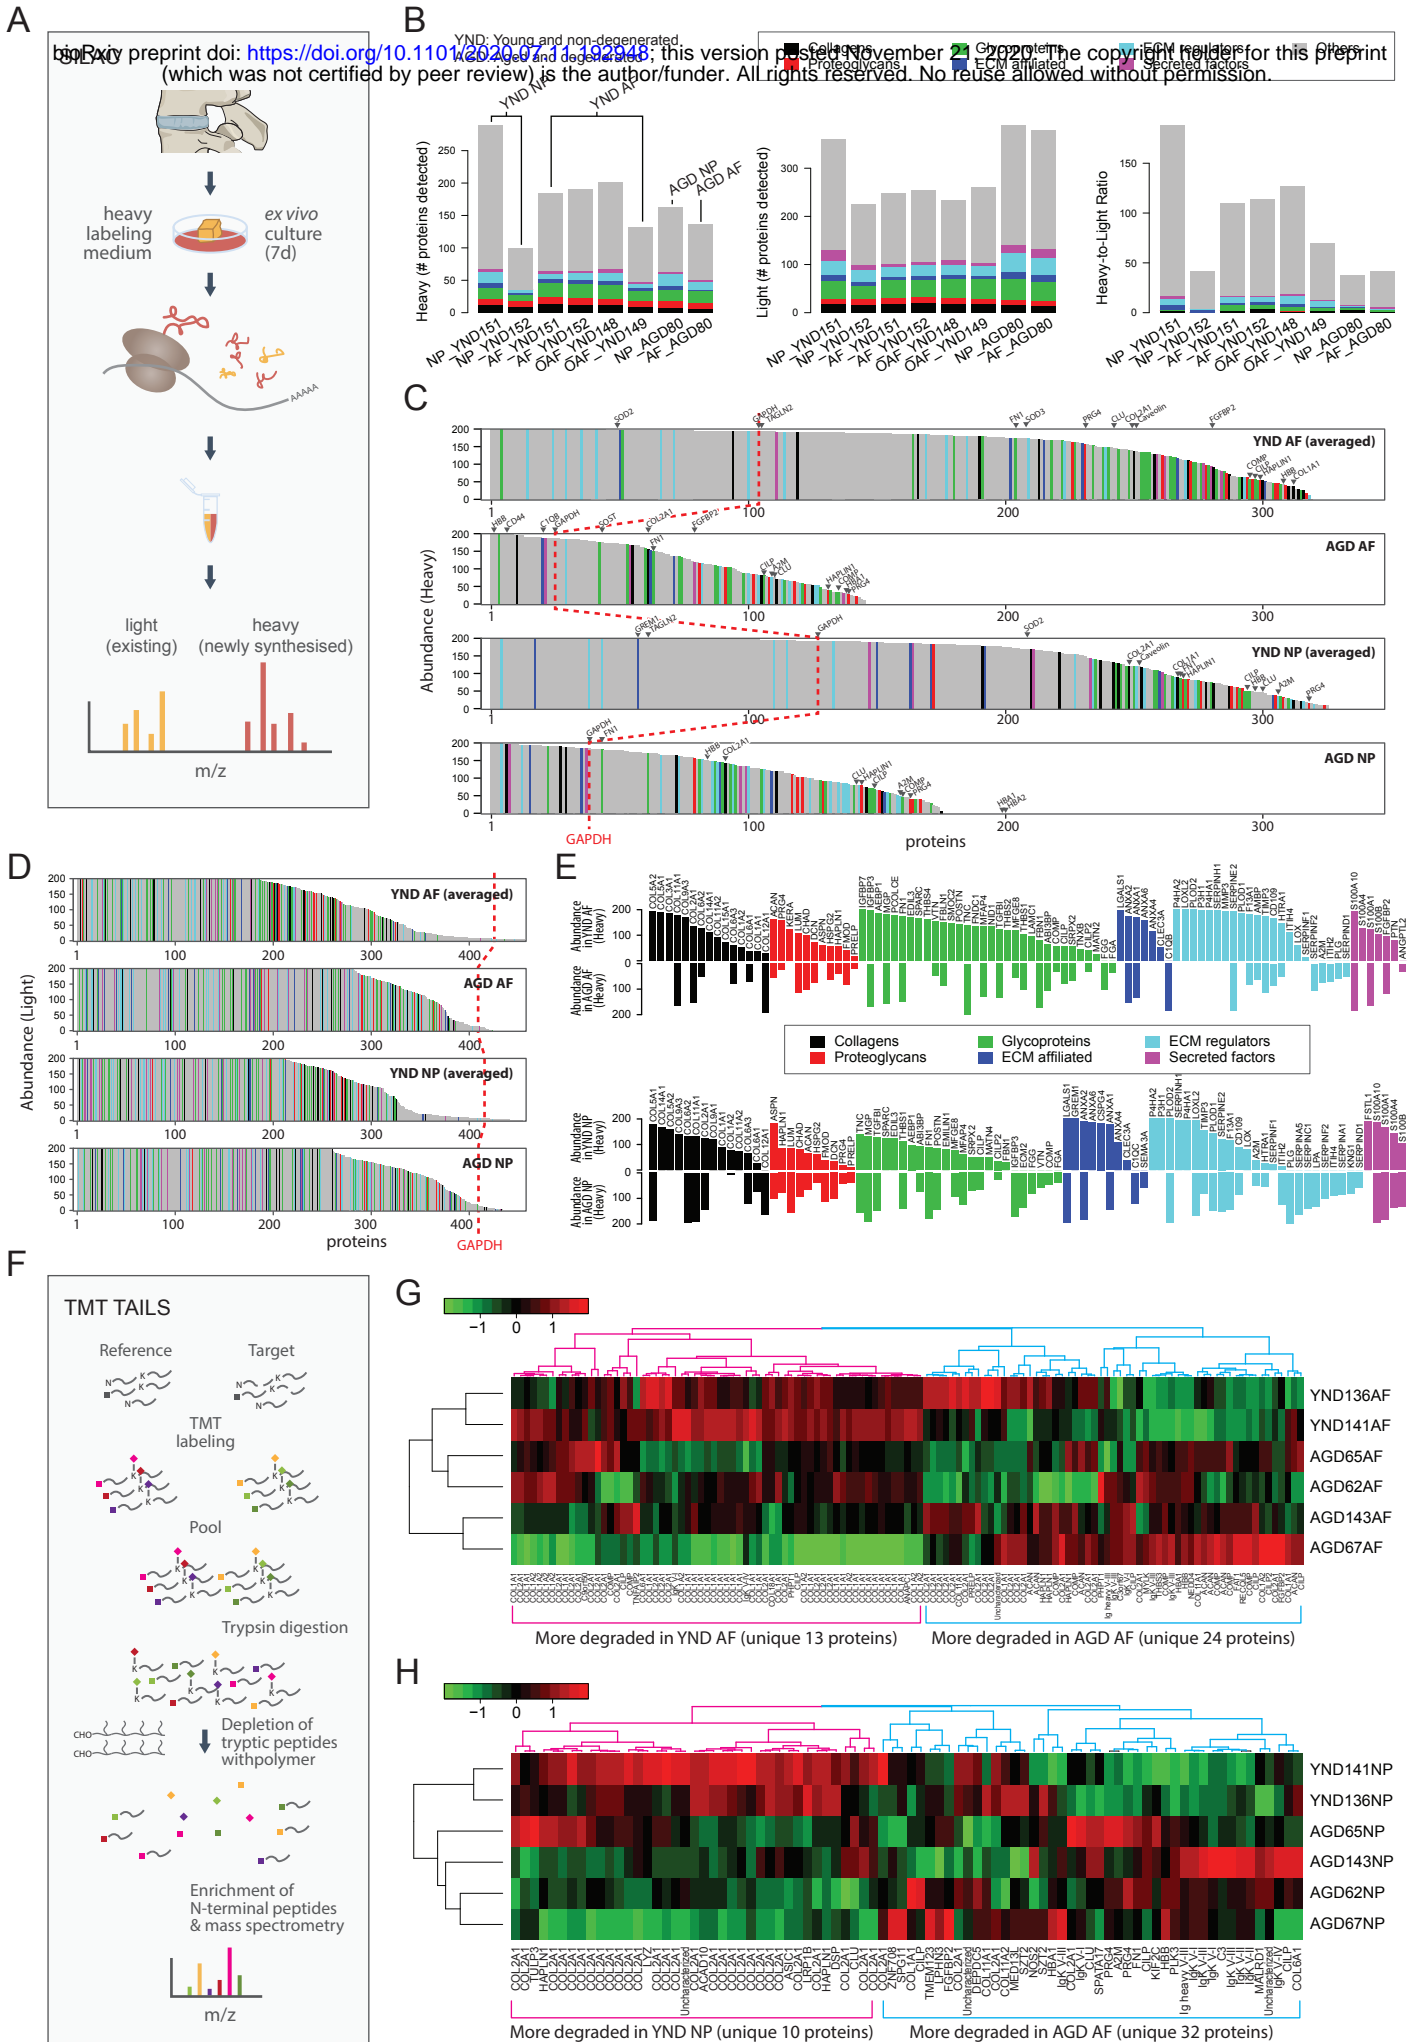



**FIGURE 8**

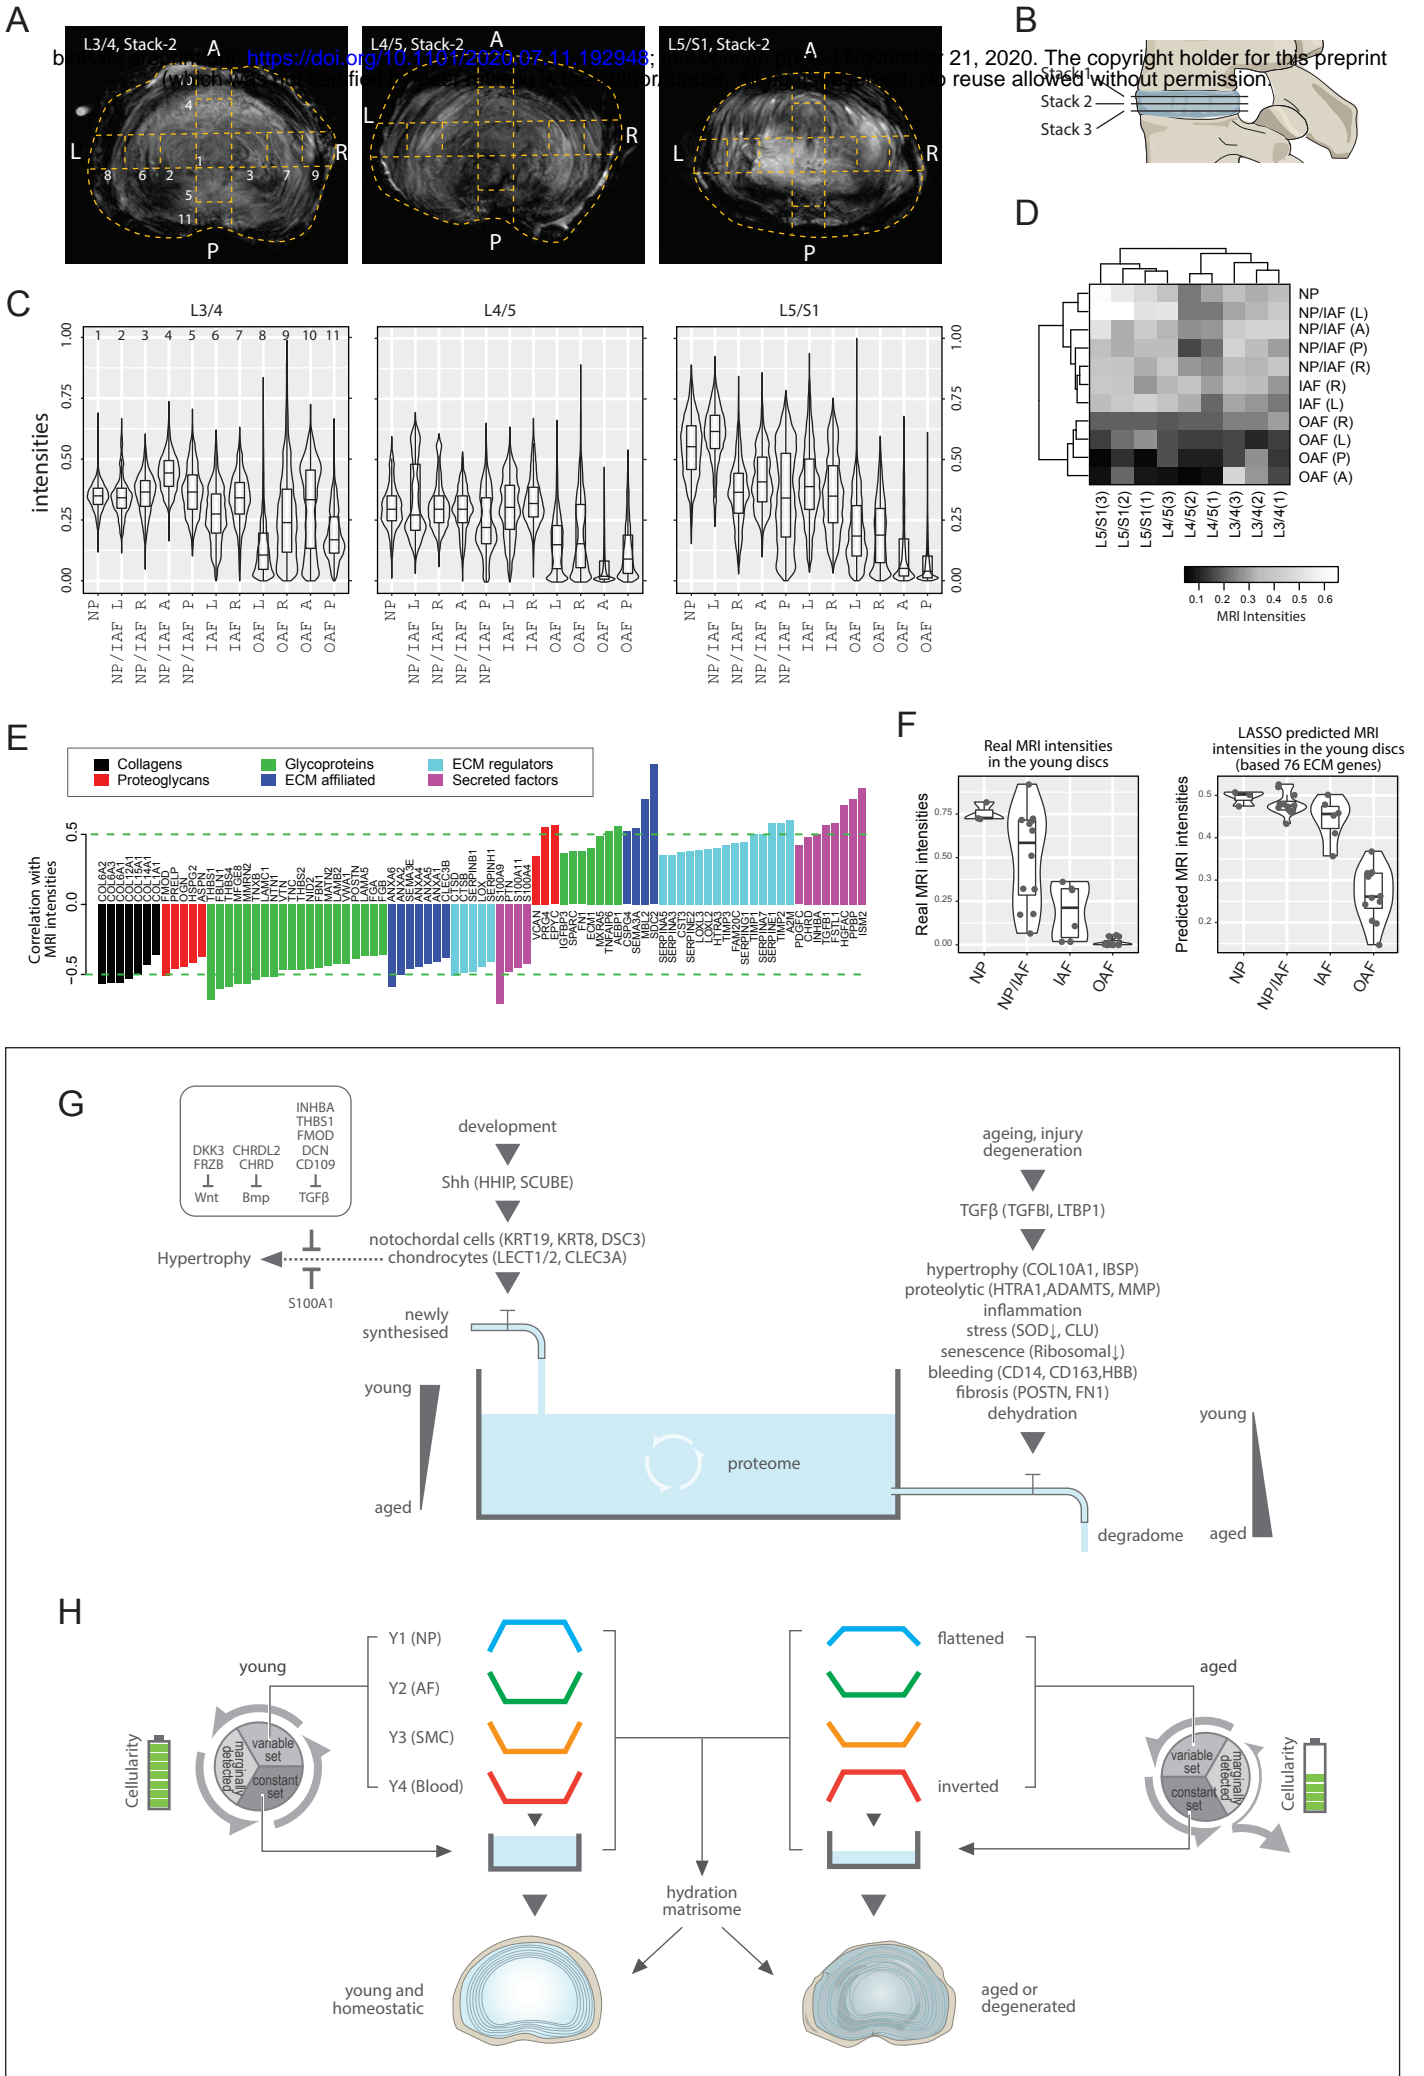

Source: https://www.biorxiv.org/content/10.1101/2020.07.11.192948v3.full.pdf
