1 **DIPPER: a spatiotemporal proteomics atlas of human intervertebral discs for**  
2 **exploring dynamic changes in health, ageing and degeneration**

3

4 Vivian Tam<sup>1,2\*</sup>, Peikai Chen<sup>1\*</sup>, Anita Yee<sup>1</sup>, Nestor Solis<sup>3</sup>, Theo Klein<sup>3,4</sup>,  
5 Mateusz Kudelko<sup>1</sup>, Rakesh Sharma<sup>5</sup>, Wilson CW Chan<sup>1,2,6</sup>, Christopher M. Overall<sup>3</sup>,  
6 Lisbet Haglund<sup>7</sup>, Pak C Sham<sup>8</sup>, Kathryn SE Cheah<sup>1</sup>, Danny Chan<sup>1,2</sup>

7 <sup>1</sup> School of Biomedical Sciences, The University of Hong Kong, Hong Kong, China;

8 <sup>2</sup> The University of Hong Kong Shenzhen of Research Institute and Innovation, Shenzhen, China;

9 <sup>3</sup> Centre for Blood Research, Faculty of Dentistry, University of British Columbia, Vancouver, Canada;

10 <sup>4</sup> Present address: Triskelion BV, Zeist, The Netherlands;

11 <sup>5</sup> Proteomics and Metabolomics Core Facility, The University of Hong Kong, Hong Kong, China;

12 <sup>6</sup> Department of Orthopaedics Surgery and Traumatology, HKU-Shenzhen Hospital, Shenzhen, China;

13 <sup>7</sup> Department of Surgery, McGill University, Montreal, Canada;

14 <sup>8</sup> Centre for PanorOmic Sciences (CPOS), The University of Hong Kong, Hong Kong, China.

15

16

17 KSEC is a senior editor at eLife. All other authors declare that they do not have any conflict of  
18 interests

19 \* These authors contributed equally to this manuscript

20

21

22

23

24

Correspondence should be addressed to:

25 Danny Chan

26 School of Biomedical Sciences

27 Faculty of Medicine

28 The University of Hong Kong

29 21 Sassoon Road, Hong Kong

30 Email: [chand@hku.hk](mailto:chand@hku.hk)

31 Tel.: +852 3917 9482

32 **Abstract**

33 The spatiotemporal proteome of the intervertebral disc (IVD) underpins its integrity and function.  
34 We present DIPPER, a deep and comprehensive IVD proteomic resource comprising 94 genome-  
35 wide profiles from 17 individuals. To begin with, protein modules defining key directional trends  
36 spanning the lateral and anteroposterior axes were derived from high-resolution spatial proteomes  
37 of intact young cadaveric lumbar IVDs. They revealed novel region-specific profiles of regulatory  
38 activities, and displayed potential paths of deconstruction in the level- and location-matched aged  
39 cadaveric discs. Machine learning methods predicted a “hydration matrisome” that connects  
40 extracellular matrix with MRI intensity. Importantly, the static proteome used as point-references  
41 can be integrated with dynamic proteome (SILAC/degradome) and transcriptome data from  
42 multiple clinical samples, enhancing robustness and clinical relevance. The data, findings and  
43 methodology, available on a web interface, will be valuable references in the field of IVD biology  
44 and proteomic analytics.

45 (142 words)

46

47

48 **Key words:** human, intervertebral discs, nucleus pulposus, annulus fibrosus, ageing,  
49 extracellular matrix, proteomics, TAILS, degradome, SILAC, transcriptomics

50

## 51 **Introduction**

52 The 23 intervertebral discs (IVDs) in the human spine provide stability, mobility and flexibility.  
53 IVD degeneration (IDD), most common in the lumbar region (Saleem et al., 2013; Teraguchi et  
54 al., 2014), is associated with a decline in function and a major cause of back pain, affecting up to  
55 80% of the world's population at some point in life (Rubin, 2007), presenting significant  
56 socioeconomic burdens. Multiple interacting factors such as genetics, influenced by ageing,  
57 mechanical and other stress factors, contribute to the pathobiology, onset, severity and progression  
58 of IDD (Munir et al., 2018).

59 IVDs are large, avascular, extracellular matrix (ECM)-rich structures comprising three  
60 compartments: a hydrated nucleus pulposus (NP) at the centre, surrounded by a tough annulus  
61 fibrosus (AF) at the periphery, and cartilaginous endplates of the adjoining vertebral bodies  
62 (Humzah and Soames, 1988). The early adolescent NP is populated with vacuolated notochordal-  
63 like cells, which are gradually replaced by small chondrocyte-like cells (Risbud et al., 2015). Blood  
64 vessels terminate at the endplates, nourishing and oxygenating the NP via diffusion, whose limited  
65 capacity mean that NP cells are constantly subject to hypoxic, metabolic and mechanical stresses  
66 (Urban et al., 2004).

67 With ageing and degeneration, there is an overall decline in cell “health” and numbers (Rodriguez  
68 et al., 2011; Sakai et al., 2012), disrupting homeostasis of the disc proteome. The ECM has key  
69 roles in biomechanical function and disc hydration. Indeed, a hallmark of IDD is reduced hydration  
70 in the NP, diminishing the disc's capacity to dissipate mechanical loads. Clinically, T-2 weighted  
71 magnetic resonance imaging (MRI) is the gold standard for assessing IDD, that uses disc hydration  
72 and structural features such as bulging or annular tears to measure severity (Pfirrmann et al., 2001;  
73 Schneiderman et al., 1987). The hydration and mechanical properties of the IVD are dictated by  
74 the ECM composition, which is produced and maintained by the IVD cells.

75 To meet specific biomechanical needs, cells in the IVD compartments synthesise different  
76 compositions of ECM proteins. Defined as the “matrisome” (Naba et al., 2012), the ECM houses  
77 the cells and facilitates their inter-communication by regulation of the availability and presentation  
78 of signalling molecules (Taha and Naba, 2019). With ageing or degeneration, the NP becomes  
79 more fibrotic and less compliant (Yee et al., 2016), ultimately affecting disc biomechanics (Newell

80 et al., 2017). Changes in matrix stiffness can have a profound impact on cell-matrix interactions  
81 and downstream transcriptional regulation, signalling activity and cell fate (Park et al., 2011).

82 The resulting alterations in the matrisome lead to vicious feedback cycles that reinforce cellular  
83 degeneration and ECM changes. Notably, many of the associated IDD genetic risk factors, such  
84 as COL9A1 (Jim et al., 2005), ASPN (Song et al., 2008), and CHST3 (Song et al., 2013), are  
85 variants in genes encoding matrisome proteins, highlighting their importance for disc function.  
86 Therefore, knowledge of the cellular and extracellular proteome and their spatial distribution in  
87 the IVD is crucial to understanding the mechanisms underlying the onset and progression of IDD  
88 (Feng et al., 2006).

89 Current knowledge of IVD biology is inferred from a limited number of transcriptomic studies on  
90 human (Minogue et al., 2010; Riester et al., 2018; Rutges et al., 2010) and animal (Veras et al.,  
91 2020) discs. Studies showed that cells in young healthy NP express markers including CD24,  
92 KRT8, KRT19 and T (Fujita et al., 2005; Minogue et al., 2010; Rutges et al., 2010), whilst NP  
93 cells in aged or degenerated discs have different and variable molecular signatures (Chen et al.,  
94 2006; Rodrigues-Pinto et al., 2016), such as genes involved in TGF $\beta$  signalling (TGFA, INHA,  
95 INHBA, BMP2/6). The healthy AF expresses genes including collagens (COL1A1 and COL12A1)  
96 (van den Akker et al., 2017), growth factors (PDGFB, FGF9, VEGFC) and signalling molecules  
97 (NOTCH and WNT) (Riester et al., 2018). Although transcriptomic data provides valuable cellular  
98 information, it does not faithfully reflect the molecular composition. Cells represent only a small  
99 fraction of the disc volume, transcriptome-proteome discordance does not enable accurate  
100 predictions of protein levels from mRNA (Fortelny et al., 2017), and the disc matrisome  
101 accumulates and remodels over time.

102 Proteomic studies on animal models of IDD, including murine (McCann et al., 2015), canine  
103 (Erwin et al., 2015), and bovine (Caldeira et al., 2017), have been reported. Nevertheless, human-  
104 animal differences in cellular phenotypes and mechanical loading physiologies mean that these  
105 findings might not translate to the human scenario. So far, human proteomic studies have  
106 compared IVDs with other cartilaginous tissues (Onnerfjord et al., 2012a); and have shown  
107 increases in fibrotic changes in ageing and degeneration (Yee et al., 2016), a role for inflammation  
108 in degenerated discs (Rajasekaran et al., 2020), the presence of haemoglobins and

109 immunoglobulins in discs with spondylolisthesis and herniation (Maseda et al., 2016), and changes  
110 in proteins related to cell adhesion and migration in IDD (Sarath Babu et al., 2016). The reported  
111 human disc proteomes were limited in the numbers of proteins identified and finer  
112 compartmentalisation within the IVD, and disc levels along the lumbar spine have yet to be  
113 studied. Nor have the proteome dynamics in term of ECM remodelling (synthesis and degradation)  
114 in young human IVDs and changes in ageing and degeneration been described.

115 In this study, we presented DIPPER (analogous to the Big Dipper which are point-reference stars  
116 for guiding nautical voyages), a comprehensive disc proteomic resource, comprising static spatial  
117 proteome, dynamic proteome and transcriptome and a methodological flow, for studying the  
118 human intervertebral disc in youth, ageing and degeneration. First, we established a high-  
119 resolution point-reference map of static spatial proteomes along the lateral and anteroposterior  
120 directions of IVDs at three lumbar levels, **contributed by a young (16M) and an aged (59M)**  
121 **cadavers with no reported scoliosis or degeneration.** We evaluated variations among the disc  
122 compartments and levels by principal component analysis (PCA), analysis of variance (ANOVA)  
123 and identification of differentially expressed proteins (DEPs). We discovered modules containing  
124 specific sets of proteins that describe the directional trends of a young IVD, and the deconstruction  
125 of these modules with ageing and degeneration. Using a LASSO regression model, we identified  
126 proteins (the hydration matrisome) predictive of tissue hydration as indicated by high-resolution  
127 MRI of the aged discs. Finally, we showed how the point-reference proteomes can be utilized, to  
128 integrate with other independent transcriptome and dynamic proteome (SILAC and degradome)  
129 datasets from additional 15 clinical disc specimens, elevating the robustness of the proteomic  
130 findings. An explorable web interface hosting the data and findings is presented, serving as a useful  
131 resource for the scientific community.

132

## 133 **Results**

### 134 ***Disc samples and their phenotypes***

135 DIPPER comprises 94 genome-wide measurements from lumbar disc components of 17  
136 individuals (Figure 1A; Table 1), with data types ranging from label-free proteomic,  
137 transcriptomic, SILAC to degradome (Lopez-Otin and Overall, 2002). High-resolution static  
138 spatial proteomes were generated from multiple intact disc segments of young trauma-induced (16  
139 M) and aged (57 M) cadaveric spines. T1- and T2-weighted MRI (3T) showed the young discs  
140 (L3/4, L4/5, L5/S1) were non-degenerated, with a Schneiderman score of 1 from T2 images  
141 (Figure 1B). The NP of young IVD were well hydrated (white) with no disc bulging, endplate  
142 changes, or observable inter-level variations (Figure 1B; Supplemental Figure S1A), consistent  
143 with healthy discs and were deemed fit to serve as a benchmarking point-reference. To investigate  
144 structural changes associated with ageing, high resolution (7T) MRI was taken for the aged discs  
145 (Figure 1C). All discs had irregular endplates, and annular tears were present (green arrowheads)  
146 adjacent to the lower endplate and extending towards the posterior region at L3/4 and L4/5 (Figure  
147 1C). The NP exhibited regional variations in hydration in both sagittal and transverse images  
148 (Figure 1C). Morphologically, the aged discs were less hydrated and the NP and AF structures less  
149 distinct, consistent with gross observations (Supplemental Figure S1A). Scoliosis was not detected  
150 in these two individuals.

151 **Information of the disc samples used in the generation of other profiling data are described in**  
152 **methods and Table 1. They are clinical samples taken from patients undergoing surgery. The disc**  
153 **levels and intactness varied, and thus are more suitable for cross-validation purposes and some are**  
154 **directly relevant to IDD.**

### 155 ***Quality data detecting large numbers of matrixome and non-matrixome proteins***

156 The intact discs from the two cadaveric spines enabled us to derive spatial proteomes for young  
157 and aged human IVDs. We subdivided each lumbar disc into 11 key regions (Figure 1D), spanning  
158 the outer-most (outer AF; OAF) to the central-most (NP) region of the disc, traversing both  
159 anteroposterior and lateral axes, adding valuable spatial information to our proteomic dataset.  
160 Since the disc is an oval shape, an inner AF (IAF) region was assigned in the lateral directions. A

161 “mixed” compartment between the NP and IAF with undefined boundary was designated as the  
162 NP/IAF in all four (anteroposterior and lateral) directions. In all, this amounted to 66 specimens  
163 with different compartments, ages, directions and levels, which then underwent LC-MS/MS  
164 profiling (Supplemental Table S1). Systematic analyses of the 66 profiles are depicted in a  
165 flowchart (Figure 1A).

166 A median of 654 proteins per profile were identified for the young samples and 829 proteins for  
167 the aged samples, with a median of 742 proteins per profile for young and aged combined. The  
168 proteome-wide distributions were on similar scales across the profiles (Supplemental Figure S1B).  
169 Of the 3,100 proteins detected in total, 418 were matrisome proteins (40.7% of all known  
170 matrisome proteins) and 2,682 non-matrisome proteins (~14% of genome-wide non-matrisome  
171 genes) (Figure 1E; Supplemental Figure S1C), and 983 were common to all four major  
172 compartments, namely the OAF, IAF, NP/IAF, and NP (Figure 1E, upper panel). A total of 1,883  
173 proteins were identified in young discs, of which 690 (36%) were common to all regions.  
174 Additionally, 45 proteins (2.4%) were unique to NP, whilst NP/IAF, IAF and OAF had 86 (4.6%),  
175 54 (2.9%) and 536 (28%) unique proteins, respectively (Figure 1E, middle panel). For the aged  
176 discs, 2,791 proteins were identified, of which 803 (28.8%) were common to all regions. NP,  
177 NP/IAF and IAF had 34 (12%), 80 (28.7%) and 44 (15%) unique proteins, respectively, with the  
178 OAF accounting for the highest proportion of 1,314 unique proteins (47%) (Figure 1E, lower  
179 panel). The aged OAF had the highest number of detected proteins with an average of 1,156,  
180 followed by the young OAF with an average of 818 (Figure 1F). The quantity and spectrum of  
181 protein categories identified suggest sufficient proteins had been extracted and the data are of high  
182 quality.

### 183 *Levels of matrisome proteins decline in all compartments of aged discs*

184 We divided the detected matrisome proteins into core matrisome (ECM proteins, encompassing  
185 collagens, proteoglycans and glycoproteins), and non-core matrisome (ECM regulators, ECM  
186 affiliated and secreted factors), according to a matrisome classification database (Naba et al., 2012)  
187 ([matrisomeproject.mit.edu](http://matrisomeproject.mit.edu)) (Figure 1F). Despite the large range of total numbers of proteins  
188 detected (419 to 1,920) across the 66 profiles (Figure 1F), all six sub-categories of the matrisome  
189 contained similar numbers of ECM proteins (Figure 1F & G; Supplemental Figure S2A). The non-



190 core matrisome proteins were significantly more abundant in aged than in young discs  
191 (Supplemental Figure S2A). On average, 19 collagens, 18 proteoglycans, 68 glycoproteins, 52  
192 ECM regulators, 22 ECM affiliated proteins, and 29 secreted factors of ECM were detected per  
193 profile. The majority of the proteins in these matrisome categories were detected in all disc  
194 compartments, and in both age groups. A summary of all the comparisons are presented in  
195 Supplemental Figure S1C-E, and the commonly expressed matrisome proteins are listed in Table  
196 2.

197 Even though there are approximately three times more non-matrisome than matrisome proteins  
198 per profile on average (Figure 1F), their expression levels in terms of label-free quantification  
199 (LFQ) values are markedly lower (Supplemental Figure S2B). Specifically, the expression levels  
200 of core-matrisome were the highest, with an average  $\log_2(\text{LFQ})$  of 30.65, followed by non-core  
201 matrisome at 28.56, and then non-matrisome at 27.28 (Supplemental Figure S2B). Within the core-  
202 matrisome, the expression was higher ( $p=6.4 \times 10^{-21}$ ) in young (median 30.74) than aged (median  
203 29.72) discs (Supplemental Figure S2C & D). This difference between young and aged discs is  
204 consistent within the sub-categories of core and non-core matrisome, with the exception of the  
205 ECM regulator category (Figure 1H). The non-core matrisome and non-matrisome, however,  
206 exhibited smaller cross-compartment and cross-age differences in terms of expression levels  
207 (Supplemental Figure S2E-H). That is, the levels of ECM proteins in each compartment of the disc  
208 declines with ageing and possibly changes in the relative composition, while the numbers of  
209 proteins detected per matrisome sub-category remain similar. This agrees with the concept that  
210 with ageing, ECM synthesis is not sufficient to counterbalance degradation, as exemplified in a  
211 proteoglycan study (Silagi et al., 2018).

### 212 *Cellular activities inferred from non-matrisome proteins*

213 Although 86.5% (2,682) of the detected proteins were non-matrisome, their expression levels were  
214 considerably lower than matrisome proteins across all sample profiles (Figure 1F). A functional  
215 categorisation according to the Human Genome Nomenclature Committee gene family annotations  
216 (Yates et al., 2017) showed many categories containing information for cellular components and  
217 activities, with the top 30 listed in Figure 1I. These included transcriptional and translational  
218 machineries, post-translational modifications, mitochondrial function, protein turnover; and



219 importantly, transcriptional factors, cell surface markers, and inflammatory proteins that can  
220 inform gene regulation, cell identity and response in the context of IVD homeostasis, ageing and  
221 degeneration.

222 These functional overviews highlighted 77 DNA-binding proteins and/or transcription factors, 83  
223 cell surface markers, and 175 inflammatory-related proteins, with their clustering data presented  
224 as heatmaps (Supplemental Figure S3). Transcription factors and cell surface markers are detected  
225 in some profiles (Supplemental Figure S3A and B). The heatmap of the inflammatory-related  
226 proteins showed that more than half of the proteins are detected in the majority of samples, with 4  
227 major clusters distinguished by age and expression levels (Supplemental S3C). For example, one  
228 of the clusters in the aged samples showed enrichment for complement and coagulation cascades  
229 (False Discovery Rate, FDR  $q=1.62\times 10^{-21}$ ) and clotting factors (FDR  $q=6.05\times 10^{-9}$ ), indicating  
230 potential infiltration of blood vessels. Lastly, there are 371 proteins involved in signalling  
231 pathways, and their detection frequency in the different compartments and heat map expression  
232 levels are illustrated in Supplemental Figure S3D.

### 233 *Histones and housekeeping genes inform cross compartment- and age-specific* 234 *variations in cellularity*

235 Cellularity within the IVD, especially the NP, decreases with age and degeneration (Rodriguez et  
236 al., 2011; Sakai et al., 2012). We assessed whether cellularity of the different compartments could  
237 be inferred from the proteomic data. Quantitation of histones can reflect the relative cellular  
238 content of tissues (Wisniewski et al., 2014). We detected 10 histones, including subunits of histone  
239 1 (HIST1H1B/C/D/E, HIST1H2BL, HIST1H3A, HIST1H4A) and histone 2 (HIST2H2AC,  
240 HIST2H2BE, HIST2H3A), with 4 subunits identified in over 60 sample profiles that are mutually  
241 co-expressed (Supplemental Figure S4A). Interestingly, histone concentrations, and thus  
242 cellularity, increased from the inner to the outer compartments of the disc, and showed a highly  
243 significant decrease in aged discs compared to young discs across all compartments (Figure 1J),  
244 (Wilcoxon  $p=5.6\times 10^{-4}$ ) (Supplemental Figure S4B).

245 GAPDH and ACTA2 are two commonly used reference proteins, involved in the metabolic  
246 process and the cytoskeletal organisation of cells, respectively. They are expected to be relatively  
247 constant between cells and are used to quantify the relative cellular content of tissues (Barber et

248 al., 2005). They were detected in all 66 profiles. GAPDH and ACTA2 amounts were significantly  
249 correlated with a Pearson correlation coefficient (PCC) of 0.794 ( $p=9.3\times 10^{-9}$ ) (Supplemental  
250 Figure S4C), and they were both significantly co-expressed with the detected histone subunits,  
251 with PCCs of 0.785 and 0.636, respectively (Figure 1K; Supplemental Figure S4D). As expected,  
252 expression of the histones, GAPDH and ACTA2 was not correlated with two core-matrisome  
253 proteins, ACAN and COL2A1 (Supplemental Figure S4E); whereas ACAN and COL2A1 were  
254 significantly co-expressed (Supplemental Figure S4F), as expected due to their related regulation  
255 of expression and tissue function. Thus, cellularity information can be obtained from proteomic  
256 information, and the histone quantification showing reduced cellularity in the aged IVD is  
257 consistent with the reported changes (Rodriguez et al., 2011; Sakai et al., 2012).

## 258 ***Phenotypic variations revealed by PCA and ANOVA***

### 259 *PCA captures the information content distinguishing age and tissue types*

260 To gain a global overview of the data, we performed PCA on a set of 507 proteins selected  
261 computationally, allowing maximal capture of valid values, while incurring minimal missing  
262 values, followed by imputations (Supplemental Figure S5; Methods). The first two principal  
263 components (PCs) explained a combined 65.5% of the variance, with 39.9% and 25.6% for the  
264 first and second PCs, respectively (Figure 2A and B). A support vector machine with polynomial  
265 kernel was trained to predict the boundaries: it showed PC1 to be most informative to predict age,  
266 with a clear demarcation between the two age groups (Figure 2A, vertical boundary), whereas PC2  
267 distinguished disc sample localities, separating the inner compartments (NP, NP/IAF and IAF)  
268 from the OAF (Figure 2A, horizontal boundary). PC3 captured only 5.0% of the variance (Figure  
269 2C & D), but it distinguished disc level, separating the lowest level (L5/S1) from the rest of the  
270 lumbar discs (L3/4 and L4/5) (Figure 2D, horizontal boundary). Samples in the upper level (L3/4  
271 and L4/5) appeared to be more divergent, with the aged disc samples deviating from the young  
272 ones (Figure 2D).

### 273 *Top correlated genes with the principal components are insightful of disc homeostasis*

274 To extract the most informative features of the PCA, we performed proteome-wide associations  
275 with each of the top three PCs, which accounted for over 70% of total variance, and presented the

276 top 100 most positively and top 100 most negatively correlated proteins for each of the PCs (Figure  
277 2E-G). As expected, the correlation coefficients in absolute values were in the order of PC1 >  
278 PC2 > PC3 (Figure 2E-G). The protein content is presented as non-matrisome proteins (grey  
279 colour) and matrisome proteins (coloured) that are sub-categorised as previously. For the  
280 negatively correlated proteins, the matrisome proteins contributed to PC1 in distinguishing young  
281 disc samples, as well as to PC2 for sample location within the disc, but less so for disc level in  
282 PC3. Further, the relative composition of the core and non-core matrisome proteins varied between  
283 the three PCs, depicting the dynamic ECM requirement and its relevance in ageing (PC1), tissue  
284 composition within the disc (PC2) and mechanical loading (PC3).

285 PC1 of young discs identified known chondrocyte markers, CLEC3A (Lau et al., 2018) and  
286 LECT1/2 (Zhu et al., 2019); hedgehog signalling proteins, HHIPL2, HHIP, and SCUBE1 (Johnson  
287 et al., 2012); and xylosyltransferase-1 (XYLT1), a key enzyme for initiating the attachment of  
288 glycosaminoglycan side chains to proteoglycan core proteins (Silagi et al., 2018) (Figure 2E). Most  
289 of the proteins that were positively correlated in PC1 were coagulation factors or coagulation  
290 related, suggesting enhanced blood infiltration in aged discs. PC2 implicated key changes in  
291 molecular signalling proteins (hedgehog, WNT and Nodal) in the differences between the inner  
292 and outer disc regions (Figure 2F). Notably, PC2 contains heat shock proteins (HSPA1B, HSPA8,  
293 HSP90AA1, HSPB1) which are more strongly expressed in the OAF than in inner disc, indicating  
294 the OAF is under stress (Takao and Iwaki, 2002). Although the correlations in PC3 were much  
295 weaker, proteins such as CILP/CILP2, DCN, and LUM were associated with lower disc level.

### 296 *ANOVA reveals the principal phenotypes for categories of ECMs*

297 To investigate how age, disc compartment, level, and direction affect the protein profiles, we  
298 carried out ANOVA for each of these phenotypic factors for the categories of matrisome and non-  
299 matrisome proteins (Supplemental Figure S5H-J). In the young discs, the dominant phenotype  
300 explaining the variances for all protein categories was disc compartment. It is crucial that each  
301 disc compartment (NP, IAF and OAF) has the appropriate protein composition to function  
302 correctly (Supplemental Figure S5I). This also fits the understanding that young healthy discs are  
303 axially symmetric and do not vary across disc levels. In aged discs, compartment is still relevant  
304 for non-matrisome proteins and collagen, but disc level and directions become influential for other

305 protein categories, which is consistent with variations in mechanical loading occurring in the discs  
306 with ageing and degeneration (Supplemental Figure S5J). In the combined (young and aged) disc  
307 samples, age was the dominant phenotype across major matrisome categories, while compartment  
308 best explained the variance in non-matrisome, reflecting the expected changes in cellular (non-  
309 matrisome) and structural (matrisome) functions of the discs (Supplemental Figure S5H). This  
310 guided us to analyse the young and aged profiles separately, before performing cross-age  
311 comparisons.

### 312 ***The high-resolution spatial proteome of young and healthy discs***

313 PCA of the 33 young profiles showed a distinctive separation of the OAF from the inner disc  
314 regions on PC1 (upper panel of Figure 3A). In PC2, the lower level L5/S1 could generally be  
315 distinguished from the upper lumbar levels (lower panel of Figure 3A). The detected proteome of  
316 the young discs (Figure 3B) accounts for 9.2% of the human proteome (or 1,883 out of the 20,368  
317 on UniProt). We performed multiple levels of pairwise comparisons (summarised in Supplemental  
318 Figure S6A) to detect proteins associated with individual phenotypes, using three approaches (see  
319 Methods): statistical tests; proteins detected in one group only; or proteins using a fold-change  
320 threshold. We detected a set of 671 DEPs (Supplemental Table S2) (termed the ‘variable set’),  
321 containing both matrisome and non-matrisome proteins (Figure 3D), and visualised in a heatmap  
322 (Supplemental Figure S7), with identification of four modules (Y1-Y4).

### 323 ***Expression modules show lateral and anteroposterior trends***

324 To investigate how the modules are associated with disc components, we compared their protein  
325 expression profiles along the lateral and anteroposterior axes. The original  $\log_2(\text{LFQ})$  values were  
326 transformed to z-scores to be on the same scale. Proteins of the respective modules were  
327 superimposed on the same charts, disc levels combined or separated (Figure 3E-H; Supplemental  
328 Figure S8). Module Y1 is functionally relevant to NP, containing previously reported NP and novel  
329 markers KRT19, CD109, KRT8 and CHRDL2 (Anderson et al., 2002), SCUBE1 (Johnson  
330 et al., 2012) and CLEC3B. Proteins levels in Y1 are lower on one side of the OAF, increases  
331 towards the central NP, before declining towards the opposing side, forming a concave pattern in  
332 both lateral and anteroposterior directions, with a shoulder drop occurring between IAF and OAF  
333 (Figure 3E).

334 Module Y2 was enriched in proteins for ECM organisation (FDR  $q=8.8\times 10^{-24}$ ); Y3 was enriched  
335 for proteins involved in smooth muscle contraction processes (FDR  $q=8.96\times 10^{-19}$ ); and Y4 was  
336 enriched for proteins of the innate immune system (FDR  $q=2.93\times 10^{-20}$ ). Interestingly, these  
337 modules all showed a tendency for convex patterns with upward expression toward the OAF  
338 regions, in both lateral and anteroposterior directions, in all levels, combined or separated (Figure  
339 3F-H; Supplemental S8B-D). The higher proportions of ECM, muscle contraction and immune  
340 system proteins in the OAF are consistent with the contractile function of the AF (Nakai et al.,  
341 2016), and with the NP being avascular and “immune-privileged” in a young homeostatic  
342 environment (Sun et al., 2020).

### 343 *Inner disc regions are characterised with NP markers*

344 The most distinctive pattern on the PCA is the separation of the OAF from the inner disc, with 99  
345 proteins expressed higher in the OAF and 55 expressed higher in the inner disc (Figure 3I,J).  
346 Notably, OAF and inner disc contained different types of ECM proteins. The inner disc regions  
347 were enriched in collagens (COL3A1, COL5A1, COL5A2, and COL11A2), matrillin (MATN3),  
348 and proteins associated with ECM synthesis (PCOLCE) and matrix remodelling (MXRA5). We  
349 also identified in the inner disc previously reported NP markers (KRT19, KRT8) (Risbud et al.,  
350 2015), in addition to inhibitors of WNT (FRZB, DKK3) and BMP (CHRD, CHRDL2) signalling  
351 (Figure 3I,J). Of note, FRZB and CHRDL2 were recently shown to have potential protective  
352 characteristics in osteoarthritis (Ji et al., 2019). The TGF $\beta$  pathway appears to be suppressed in the  
353 inner disc where antagonist CD109 (Bizet et al., 2011; Li et al., 2016) is highly expressed, and the  
354 TGF $\beta$  activity indicator TGFBI is expressed higher in the OAF than in the inner disc.

### 355 *The OAF signature is enriched with proteins characteristic of tendon and ligament*

356 The OAF is enriched with various collagens (COL1A1, COL6A1/2/3, COL12A1 and COL14A1),  
357 basement membrane (BM) proteins (LAMA4, LAMB2 and LAMC1), small leucine-rich  
358 proteoglycans (SLRP) (BGN, DCN, FMOD, OGN, PRELP), and BM-anchoring protein (PRELP)  
359 (Figure 3I,J). Tendon-related markers such as thrombospondins (THBS1/2/4) (Subramanian and  
360 Schilling, 2014) and cartilage intermediate layer proteins (CILP/CILP2) are also expressed higher  
361 in the OAF. Tenomodulin (TNMD) was exclusively expressed in 9 of the 12 young OAF profiles,  
362 and not in any other compartments (Supplemental Table S2). This fits a current understanding of

363 the AF as a tendon/ligament-like structure (Nakamichi et al., 2018). In addition, the OAF was  
364 enriched in actin-myosin (Figure 3I), suggesting a role of contractile function in the OAF, and in  
365 heat shock proteins (HSPA1B, HSPA8, HSPB1, HSP90B1, HSP90AA1), suggesting a stress  
366 response to fluctuating mechanical loads.

### 367 *Spatial proteome enables clear distinction between IAF and OAF*

368 We sought to identify transitions in proteomic signatures between adjacent compartments. The NP  
369 and NP/IAF protein profiles were highly similar (Supplemental Figure 6B). Likewise, NP/IAF and  
370 IAF showed few DEPs, except COMP which was expressed higher in IAF (Supplemental Figure  
371 6C). OAF and NP (Supplemental Figure 6R), and OAF and NP/IAF (Supplemental Figure 6O)  
372 showed overlapping DEPs, consistent with NP and NP/IAF having highly similar protein profiles,  
373 despite some differences in the anteroposterior direction (Supplemental Figure 6P & Q). The  
374 clearest boundary within the IVD, between IAF and OAF, was marked by a set of DEPs, of which  
375 COL5A1, SERPINA5, MXRA5 were enriched in the IAF, whereas LAMB2, THBS1, CTSD  
376 typified the OAF (Supplemental Figure 6D). These findings agreed with the modular patterns  
377 (Figure 3E-H).

### 378 *The constant set represents the baseline proteome among structures within the young* 379 *disc*

380 Of the 1,880 proteins detected, 1204 proteins were not found to vary with respect to the phenotypic  
381 factors. The majority of these proteins were detected in few profiles (Figure 3B) and were not used  
382 in the comparisons. We set a cutoff for a detection in  $>1/2$  of the profiles to prioritise a set of 245  
383 proteins, hereby referred to as the ‘constant set’ (Figure 3C). Both the variable and the constant  
384 sets contained high proportions of ECM proteins (Figure 3D). Amongst the proteins in the constant  
385 set that were detected in all 33 young profiles were known protein markers defining a young NP  
386 or disc, including COL2A1, ACAN and A2M (Risbud et al., 2015). Other key proteins in the  
387 constant set included CHAD, HAPLN1, VCAN, HTRA1, CRTAC1, and CLU. Collectively, these  
388 proteins showed the common characteristics shared by compartments of young discs, and they,  
389 alongside the variable set, form the architectural landscape of the young disc.



## 390 ***Diverse changes in the spatial proteome with ageing***

### 391 *Fewer inner-outer differences but greater variation between levels in aged discs*

392 PCA was used to identify compartmental, directional and level patterns for the aged discs (Figure  
393 4A). Albeit less clear than for the young discs (Figure 3A), the OAF could be distinguished from  
394 the inner disc regions on PC1, explaining 46.7% of the total variance (Figure 4A). PC2 showed a  
395 more distinct separation of signatures from lumbar disc levels L5/S1 to the upper disc levels  
396 (L4/L5 and L3/4), accounting for 21.8% of the total variance (Figure 4A).

### 397 *Loss of the NP signature from inner disc regions*

398 As with the young discs, we performed a series of comparative analyses (Figure 4C; Supplemental  
399 Figure S9 A-H; Supplemental Table S3). Detection of DEPs between the OAF and the inner disc  
400 (Figure 4B), showed that 100 proteins were expressed higher in the OAF, similar to young discs  
401 (Figure 3C). However, in the inner regions, only 9 proteins were significantly expressed higher, in  
402 marked contrast to the situation in young discs. Fifty-five of the 100 DEPs in the OAF region  
403 overlapped in the same region in the young discs, but only 3 of the 9 DEPs in the inner region were  
404 identified in the young disc; indicating changes in both regions but more dramatic in the inner  
405 region. This suggests that ageing and associated changes may have initiated at the centre of the  
406 disc. The typical NP markers (KRT8/19, CD109, CHRD, CHRDL2) were not detectable as DEPs  
407 in the aged disc; but CHI3L2, A2M and SERPING1 (Figure 4B), which have known roles in tissue  
408 fibrosis and wound healing (Lee et al., 2011; Naveau et al., 1994; Wang et al., 2019a), were  
409 detected uniquely in the aged discs.

### 410 *Gradual modification of ECM composition and cellular responses in the outer AF*

411 A comparative analysis of the protein profiles indicated that the aged OAF retained 55% of the  
412 proteins of a young OAF. These changes are primarily reflected in the class of SLRPs (BGN, DCN,  
413 FMOD, OGN, and PRELP), and glycoproteins such as CILP, CILP2, COMP, FGA/B, and FGG.  
414 From a cellular perspective, 45 proteins enriched in the aged OAF could be classified under  
415 ‘responses to stress’ (FDR  $q=1.86 \times 10^{-7}$ ; contributed by CAT, PRDX6, HSP90AB1, EEF1A1,  
416 TUBB4B, P4HB, PRDX1, HSPA5, CRYAB, HIST1H1C), suggesting OAF cells are responding  
417 to a changing environment such as mechanical loading and other stress factors.



#### 418 *Convergence of the inner disc and outer regions in aged discs*

419 To map the relative changes between inner and outer regions of the aged discs, we performed a  
420 systematic comparison between compartments (Supplemental Figure S9 A-D). The most  
421 significant observation was a weakening of the distinction between IAF and OAF that was seen in  
422 young discs, with only 17 DEPs expressed higher in the OAF of the aged disc (Supplemental  
423 Figure S9C). More differences were seen when we included the NP in the comparison with OAF  
424 (Supplemental Figure S9D), indicating some differences remain between inner and outer regions  
425 of the aged discs. While the protein profiles of the NP and IAF were similar, with no detectable  
426 DEPs (Supplemental Figure S9A & B), their compositions shared more resemblance with the  
427 OAF. These progressive changes of the protein profiles and DEPs between inner and outer  
428 compartments suggest the protein composition of the inner disc compartments becomes more  
429 similar to the OAF with ageing, with the greatest changes in the inner regions. This further supports  
430 a change initiating from the inner region of the discs with ageing.

#### 431 *Changes in young module patterns reflect convergence of disc compartments*

432 We investigated protein composition in the young disc modules (Y1-Y4) across the lateral and  
433 anteroposterior axes (Figure 4C-F). For module Y1 that consists of proteins defining the NP  
434 region, the distinctive concave pattern has flattened along both axes, but more so for the  
435 anteroposterior direction where the clear interface between IAF and OAF was lost (Figure 4C;  
436 Supplemental Figure S9I). Similarly for modules Y2 and Y3, which consist of proteins defining  
437 the AF region, the trends between inner and outer regions of the disc have changed such that the  
438 patterns become more convex, with a change that is a continuum from inner to outer regions  
439 (Figure 4D,E; Supplemental Figure S9J,K). These changes in modules Y1-3 in the aged disc  
440 further illustrate the convergence of the inner and outer regions, with the NP/IAF becoming more  
441 OAF-like. For Y4, the patterns along the lateral and anteroposterior axes were completely  
442 disrupted (Figure 4F; Supplemental Figure S9J). **As Y4 contains proteins involved in vascularity  
443 and inflammatory processes (Supplemental Table 5), these changes indicate disruption of cellular  
444 homeostasis in the NP.**

445 *Disc level variations reflect spatial and temporal progression of disc changes*

446 The protein profiles of the aged disc levels, consistent with the PCA findings, showed similarity  
447 between L3/4 and L4/5 (Supplemental Figure S9E), but, in contrast to young discs, differences  
448 between L5/S1 and L4/5 (Supplemental Figure S9F), and more marked differences between L5/S1  
449 and L3/4 (Supplemental Figure S9G,H). Overall, the findings from PCA, protein profiles (Figure  
450 2B-D) and MRI (Figure 1C) agree. As compared to young discs, the more divergent differences  
451 across the aged disc levels potentially reflect progressive transmission from the initiating disc to  
452 the adjacent discs with ageing. To further investigate the aetiologies underlying IDD, cross-age  
453 comparisons are needed.

454 ***Aetiological insights uncovered by young/aged comparisons***

455 Next, we performed extensive pair-wise comparisons between the young and aged samples under  
456 a defined scheme (Supplemental Figure S10A; Supplemental Table S4). First, we compared all 33  
457 young samples with all 33 aged samples, which identified 169 DEPs with 104 expressed higher in  
458 the young and 65 expressed higher in the aged discs (Figure 5A). A simple GO term analysis  
459 showed that the most important biological property for a young disc is structural integrity, which  
460 is lost in aged discs (Figure 5B; Supplemental Table S5). The protein classes most enriched in the  
461 young discs were related to cartilage synthesis, chondrocyte development, and ECM organisation  
462 (Figure 5B). The major changes in the aged discs relative to young ones, were proteins involved  
463 in cellular responses to an ageing environment, including inflammatory and cellular stress signals,  
464 progressive remodelling of disc compartments, and diminishing metabolic activities (Figure 5C;  
465 Supplemental Table S5).

466 *Inner disc regions present with most changes in ageing*

467 For young versus old discs, we compared DEPs of the whole disc (Figure 5A) with those from the  
468 inner regions (Figure 5D) and OAF (Figure 5E) only. Seventy-five percent (78/104) of the down-  
469 regulated DEPs (Figure 5F) were attributed to the inner regions, and only 17% (18/104) were  
470 attributed to the OAF (Figure 5F). Similarly, 65% (42/65) of the up-regulated DEPs were solely  
471 contributed by inner disc regions, and only 18.4% (12/65) by the OAF. Only 5 DEPs were higher

472 in the OAF, while 49 were uniquely up-regulated in the inner discs (Figure 5G). The key biological  
473 processes in each of the compartments are highlighted in Figure 5F & G.

#### 474 *The changing biological processes in the aged discs*

475 Expression of known NP markers was reduced in aged discs, especially proteins involved in the  
476 ECM and its remodelling, where many of the core matrisome proteins essential for the structural  
477 function of the NP were less abundant or absent. While this is consistent with previous  
478 observations (Feng et al., 2006), of interest was the presence of a set of protein changes that were  
479 also seen in the OAF, which was also rich in ECM and matrix remodelling proteins (HTRA1,  
480 SERPINA1, SERPINA3, SERPINC1, SERPINF1, and TIMP3) and proteins involved in fibrotic  
481 events (FN1, POSTN, APOA1, APOB), suggesting these changes are occurring in the aging IVDs  
482 (Figure 5 F,G).

483 Proteins associated with cellular stress are decreased in the aged inner disc, with functions ranging  
484 from molecular chaperones needed for protein folding (HSPB1, HSPA1B and HSPA9) to  
485 modulation of oxidative stress (SOD1) (Figure 5F). SOD1 has been shown to become less  
486 abundant in the aged IVD (Hou et al., 2014) and in osteoarthritis (Scott et al., 2010). HSPB1 is  
487 cytoprotective and a deficiency is associated with inflammation reported in degenerative discs  
488 (Wuertz et al., 2012). We found an increased concentration of clusterin (CLU) (Figure 5G), an  
489 extracellular chaperone that aids the solubilisation of misfolded protein complexes by binding  
490 directly and preventing protein aggregation (Trogakos, 2013; Wyatt et al., 2009), and also has a  
491 role in suppressing fibrosis (Peix et al., 2018).

492 Inhibitors of WNT (DKK3 and FRZB), and antagonists of BMP/TGF $\beta$  (CD109, CHRDL2, DCN  
493 FMOD, INHBA and THBS1) signalling were decreased or absent in the aged inner region (Figure  
494 5F,G), consistent with the reported up-regulation of these pathways in IDD (Hiyama et al., 2010)  
495 and its closely related condition osteoarthritis (Leijten et al., 2013). Targets of hedgehog signalling  
496 (HHIPL2 and SCUBE1) were also reduced (Figure 5F), consistent with SHH's key roles in IVD  
497 development and maintenance (Rajesh and Dahia, 2018). TGF $\beta$  signalling is a well-known  
498 pathway associated with fibrotic outcomes. WNT is known to induce chondrocyte hypertrophy  
499 (Dong et al., 2006), that can be enhanced by a reduction in S100A1 (Figure 5F), a known inhibitor  
500 of chondrocyte hypertrophy (Saito et al., 2007).

501 To gain an overview of the disc compartment variations between young and aged discs, we  
502 followed the same strategy as in Supplemental Figure S7 to aggregate three categories of DEPs in  
503 all 23 comparisons (Supplemental Figure S10A) and created a heatmap from the resulting 719  
504 DEPs. This allowed us to identify 6 major protein modules (Figure 5H). A striking feature is  
505 module 6 (M6), which is enriched for proteins involved in the complement pathway (GSEA  
506 Hallmark FDR  $q=4.9\times 10^{-14}$ ) and angiogenesis ( $q=2.3\times 10^{-3}$ ). This module contains proteins that  
507 are all highly expressed in the inner regions of the aged disc, suggesting the presence of blood. M6  
508 also contains the macrophage marker CD14, which supports this notion.

509 We visualised the relationship between the young (Y1-4) and young/aged (M1-6) modules using  
510 an alluvial chart (Figure 5I). Y1 corresponds primarily to M1b that is enriched with fibrosis,  
511 angiogenesis, apoptosis and EMT (epithelial to mesenchymal transition) proteins. Y2 seems to  
512 have been deconstructed into three M modules ( $M2b > M3 > M4$ ). M2b and M3 contain proteins  
513 linked to heterogeneous functions, while proteins in M4 are associated with myogenesis and  
514 cellular metabolism, but also linked to fibrosis and angiogenesis. Y3 primarily links to M2a with  
515 a strong link to myogenesis, and mildly connects with M3 and M4. Y4 has the strongest connection  
516 with M6a, which is linked to coagulation. Both the variable and the constant sets of the young disc  
517 were also changed in ageing. In the constant set, there is a higher tendency for a decrease in ECM-  
518 related proteins, and an increase in blood and immune related proteins with ageing, that may reflect  
519 an erosion of the foundational proteome, and infiltration of immune cells (Figure S10L).

520 In all, the IVD proteome showed that with ageing, activities of the SHH pathways were decreased,  
521 while those of the WNT and BMP/TGF $\beta$  pathways, EMT, angiogenesis, fibrosis, cellular stresses  
522 and chondrocyte hypertrophy-like events were increased.

### 523 ***Concordant changes between the transcriptome and proteome of disc cells***

524 The proteome reflects both current and past transcriptional activities. To investigate upstream  
525 cellular and regulatory activities, we obtained transcriptome profiles from two IVD compartments  
526 (NP and AF) and two sample states (young, scoliotic but non-degenerated, YND; aged individuals  
527 with clinically diagnosed IDD, AGD) (Table 1). The transcriptome profiles of YND and AGD are  
528 similar to the young and aged disc proteome samples, respectively. After normalisation  
529 (Supplemental Figure S11A) and hierarchical clustering, we found patterns reflecting relationships

530 among IVD compartments and ages/states (Supplemental Figure S11B-D). PCA of the  
531 transcriptome profiles showed that PC1 captured age/state variations (Figure 6A) and PC2  
532 captured the compartment (AF or NP) differences, with a high degree of similarity to the proteomic  
533 PCA that explained 65.0% of all data variance (Figure 2A).

#### 534 *Transcriptome shows AF-like characteristics of the aged/degenerated NP*

535 We compared the transcriptome profiles of different compartments and age/state-groups  
536 (Supplemental Figure S11E-H). We detected 88 DEGs (differentially expressed genes; Methods)  
537 between young AF and young NP samples (Supplemental Figure S11E); 39 were more abundant  
538 in young NP (including known NP markers *CD24*, *KRT19*) and 49 were more abundant in young  
539 AF, including the AF markers, *COL1A1* and *THBS1*. In the AGD samples, 11 genes differed  
540 between AF and NP (Supplemental Figure S11F), comparable to the proteome profiles (Figure  
541 4C). Between the YND and AGD AF, there were 45 DEGs, with *COL1A1* and *MMP1* more  
542 abundant in YND and *COL10A1*, WNT signalling (*WIF1*, *WNT16*), inflammatory (*TNFAIP6*,  
543 *CXCL14*, *IL11*), and fibrosis-associated (*FNI*, *CXCL14*) genes more abundant in AGD  
544 (Supplemental Figure S11G). The greatest difference was between YND and AGD NP, with 216  
545 DEGs (Supplemental Figure S11H), with a marked loss of NP markers (*KRT19*, *CD24*), and gain  
546 of AF (*THBS1*, *DCN*), proteolytic (*ADAMTS5*), and EMT (*COL1A1*, *COL3A1*, *PDPN*, *NT5E*,  
547 *LTBP1*) markers with age. Again, consistent with the proteomic findings, the most marked changes  
548 are in the NP, with the transcriptome profiles becoming AF-like.

#### 549 *Concordance between transcriptome and proteome profiles*

550 We partitioned the DEGs between the YND and AGD into DEGs for individual compartments  
551 (Figure 6B). The transcriptomic (Figure 6B) Venn diagram was very similar to the proteomic one  
552 (Figure 5F-G). For example, WNT/TGF $\beta$  antagonists and ECM genes were all down-regulated  
553 with ageing/degeneration, while genes associated with stress and ECM remodelling were more  
554 common. When we directly compared the transcriptomic DEGs and proteomic DEPs across  
555 age/states and compartments (Figure 6C-F), we observed strong concordance between the two  
556 types of datasets for a series of markers. In the young discs, concordant markers included *KRT19*  
557 and *KRT8*, *CHRD2*, *FRZB*, and *DKK3* in the NP, and *COL1A1*, *SERPINF1*, *COL14A1*, and  
558 *THBS4* in the AF (Figure 6C). In the AGD discs, concordant markers included *CHI3L2*, *A2M* and

559 *ANGPTL4* in the NP and *MYH9*, *HSP90AB1*, *HBA1*, and *ACTA2* in the AF (Figure 6D). A high  
560 degree of concordance was also observed when we compared across age/states for the AF (Figure  
561 6E) and NP (Figure 6F).

562 Despite the transcriptomic samples having diagnoses (scoliosis for YND and IDD for AGD),  
563 whereas the proteome samples were cadaver samples with no reported diagnosis of IDD, the  
564 changes detected in the transcriptome profiles substantially support the proteomic findings. A  
565 surprising indication from the transcriptome was the increased levels of *COL10A1* (Lu et al.,  
566 2014), *BMP2* (Grimsrud et al., 2001), *IBSP*, defensin beta-1 (*DEFB1*), *ADAMTS5*, pro-  
567 inflammatory (*TNFAIP6*, *CXCL*) and proliferation (*CCND1*, *IGFBP*) genes in the AGD NP  
568 (Supplemental Figure S11E-H), reaffirming the involvement of hypertrophic-like events (Melas  
569 et al., 2014) in the aged and degenerated NP.

570 The genome-wide transcriptomic data included over 20 times more genes per profile than the  
571 proteomic data, providing additional biological information about the disc, particularly low  
572 abundance proteins, such as transcription factors and surface markers. For example, additional  
573 WNT antagonists were *WIF1* (Wnt inhibitory factor) and *GREM1* (Figure 6B) (Leijten et al.,  
574 2013). Comparing the YND NP against YND AF or AGD NP (Supplemental Figure S11E,H), we  
575 identified higher expression of three transcription factors, *T* (brachyury), *HOPX* (homeodomain-  
576 only protein homeobox), and *ZNF385B* in the YND NP. Brachyury is a well-known marker for  
577 the NP (Risbud et al., 2015), and *HOPX* is differentially expressed in mouse NP as compared to  
578 AF (Veras et al., 2020), and expressed in mouse notochordal NP cells (Lam, 2013). Overall,  
579 transcriptomic data confirmed the proteomic findings and revealed additional markers.

### 580 ***Changes in the active proteome in the ageing IVD***

581 The proteomic data up to this point is a static form of measurement (static proteome) and represents  
582 the accumulation and turnover of all proteins up to the time of harvest. The transcriptome indicates  
583 genes that are actively transcribed, but does not necessarily correlate to translation or protein  
584 turnover. Thus, we studied changes in the IVD proteome (dynamic proteome) that would reflect  
585 newly synthesised proteins and proteins cleaved by proteases (degradome), and how they relate to  
586 the static proteomic and transcriptomic findings reported above.



## 587 *Aged or degenerated discs synthesise fewer proteins*

588 We performed *ex vivo* labelling of newly synthesised proteins using the SILAC protocol (Ong et  
589 al., 2002) (Figure 7A; Methods) on AF and NP samples from 4 YND individuals and one AGD  
590 individual (Table 1). In the SILAC profiles, light isotope-containing signals correspond to the pre-  
591 existing unlabelled proteome, and heavy isotope-containing signals to newly synthesised proteins  
592 (Figure 7B). The ECM compositions in the light isotope-containing profiles (Figure 7B, middle  
593 panel) are similar to the static proteome samples of the corresponding age groups described above  
594 (Figure 1F). Although for NP\_YND152, the numbers of identified proteins in the heavy profiles  
595 are considerably less than NP\_YND151 due to a technical issue during sample preparation, it is  
596 overall still more similar to NP\_YND152 than to other samples (Supplemental Figure S12B),  
597 indicating that its biological information is still representative of a young NP and the respective  
598 AF samples are similar. In contrast, the heavy isotope-containing profiles contained fewer proteins  
599 in the AGD than in the YND samples (Figure 7B, left panel) and showed variable heavy to light  
600 ratio profiles (Figure 7B, right panel).

601 To facilitate comparisons, we averaged the abundance of the proteins detected in the NP or AF for  
602 which we had more than one sample, then ranked the abundance of the heavy isotope-containing  
603 (Figure 7C) and light isotope-containing (Figure 7D) proteins. The number of proteins newly  
604 synthesised in the AGD samples was about half that in the YND samples (Figure 7C). This is  
605 unlikely to be a technical artefact as the total number of light isotope-containing proteins detected  
606 in the AGD samples is comparable to the YND, in both AF and NP (Figure 7D), and the difference  
607 is again well illustrated in the heavy to light ratios (Figure 7E).

608 Reduced synthesis of non-matrisome proteins was found for the AGD samples (GAPDH as a  
609 reference point (dotted red lines) (Figures 7C & D; Figure 7C & E, grey portions). Of the 68 high  
610 abundant non-matrisome proteins in the YND NP compartment that were not present in the AGD  
611 NP, 28 are ribosomal proteins (Supplemental Figure S12C), suggesting reduced translational  
612 activities. This agrees with our earlier findings of cellularity, as represented by histones, in the  
613 static proteome (Figure 1J, K).

614 Changes in protein synthesis in response to the cell microenvironment affects the architecture of  
615 the disc proteome. To understand how the cells may contribute and respond to the accumulated



616 matrisome in the young and aged disc, we compared the newly synthesised matrisome proteins of  
617 AGD and YND samples rearranged in order of abundance (Figure 7E). More matrisome proteins  
618 were synthesised in YND samples across all classes. In YND AF, collagens were synthesised in  
619 higher proportions than in AGD AF with the exception of fibril-associated COL12A1 (Figure 7E,  
620 top panel). Similarly, higher proportions in YND AF were observed for proteoglycans (except  
621 FMOD), glycoproteins (except TNC, FBN1, FGG and FGA), ECM affiliated proteins (except  
622 C1QB), ECM regulators (except SERPINF2, SERPIND1, A2M, ITIH2, PLG), and secreted  
623 factors (except ANGPTL2). Notably, regulators that were exclusively synthesised in young AF  
624 are involved in collagen synthesis (P4HA1/2, LOXL2, LOX, PLOD1/2) and matrix turnover  
625 (MMP3), with enrichment of protease HTRA1 and protease inhibitors TIMP3 and ITIH in YND  
626 AF compared to AGD AF.

627 In AGD NP, overall collagen synthesis was less than in YND NP (Figure 7E, lower panel);  
628 however, there was more synthesis of COL6A1/2/3 and COL12A1. Furthermore, AGD NP  
629 synthesised more LUM, FMOD, DCN, PRG4, and PRELP proteoglycans than YND NP. Notably,  
630 there was less synthesis of ECM-affiliated proteins (except C1QC and SEMA3A) and regulators  
631 – particularly those involved in collagen synthesis (P4HA1/2, LOXL2, LOX) – but an increase in  
632 protease inhibitors. A number of newly synthesised proteins in AGD NP were similarly  
633 represented in the transcriptome data, including POSTN, ITIH2, SERPINC1, IGFBP3, and PLG.  
634 Some genes were simultaneously underrepresented in the AGD NP transcriptome and newly  
635 synthesised proteins, including hypertrophy inhibitor GREM1 (Leijten et al., 2013).

### 636 *Proteome of aged or degenerated discs is at a higher degradative state*

637 The degradome reflects protein turnover by identifying cleaved proteins in a sample (Lopez-Otin  
638 and Overall, 2002). When combined with relative quantification of proteins through the use of  
639 isotopic and isobaric tagging and enrichment for cleaved neo amine (N)-termini of proteins before  
640 labelled samples are quantified by mass-spectrometry, degradomics is a powerful approach to  
641 identify the actual status of protein cleavage *in vivo*.

642 We employed the well-validated and sensitive terminal amine isotopic labelling of substrates  
643 (TAILS) method (Kleifeld et al., 2010; Rauniyar and Yates, 2014) to analyse and compare 6 discs  
644 from 6 individuals (2 young and non-degenerated, YND; and 4 aged and/or degenerated, AGD)

645 (Table 1) (Figure 7F) (Kleifeld et al., 2010; Rauniyar and Yates, 2014) using the 6-plex tandem  
646 mass tag (TMT)-TAILS (labelling 6 independent samples and analysed together on the mass  
647 spectrometer) (Figure 7F). Whereas shotgun proteomics is intended to identify the proteome  
648 components, N-terminome data is designed to identify the exact cleavage site in proteins that also  
649 evidence stable cleavage products *in vivo*.

650 Here, TAILS identified 123 and 84 cleaved proteins in the AF and NP disc samples, respectively.  
651 Performing hierarchical clustering on the data we found that the two YND samples (136 and 141;  
652 Table 1) tend to cluster together in both AF and NP (Figure 7G,H; Supplemental Figure S13A,B).  
653 Interestingly, the trauma sample AGD143 (53yr male), who has no known IDD diagnosis, tend to  
654 cluster with other clinically diagnosed AGD samples, in both AF and NP. This might be because  
655 AGD143 has unreported degeneration or ageing is a dominant factor in degradome signals.

656 We identified two protein/peptide modules in the AF (Figure 7G), corresponding to more  
657 degradation/cleaving in YND AF (magenta) and AGD AF (blue), respectively. There are only 13  
658 unique proteins for proteins/peptides more degraded in the YND AF, the most common of which  
659 is COL1A1/2, followed by COL2A1. In comparison, the module corresponding to more  
660 degradation in AGD AF recorded 24 unique proteins, 7 (CILP, CILP2, COL1A1, COMP, HBA1,  
661 HBB, PRELP) of which are in strong overlap ( $\chi^2$   $p=2.0 \times 10^{-71}$ ) with the 99 proteins higher in outer  
662 AF in the spatial proteome (Figure 3I). This indicates that key proteins defining a young outer AF  
663 is experiencing faster degradation in aged and degenerated samples.

664 Similarly, we identified two modules in the NP (Figure 7H), whereby one (magenta) corresponds  
665 to more degradation in the YND, and the other (blue) corresponds to more degradation in the AGD.  
666 Only 10 unique proteins were recorded in the magenta module (for YND), with COL2A1 being  
667 the most dominant (928 peptides); whereas 32 were recorded for the blue module (for AGD).  
668 Overall, there are more unique proteins involved in faster degradation in AGD AF and NP.

### 669 ***MRI landscape correlates with proteomic landscape***

670 We tested for a correlation between MRI signal intensity and proteome composition. In  
671 conventional 3T MRI of young discs, the NP is brightest reflecting its high hydration state while  
672 the AF is darker, thus less hydrated (Figure 1B; Supplemental Figure S14B). Since aged discs

673 present with more MRI phenotypes, we used higher resolution MRI (7T) on them (Figure 1C;  
674 Figure 8A), which showed less contrast between NP and AF than in the young discs. To enhance  
675 robustness, we obtained three transverse stacks per disc level for the aged discs (Figure 8B;  
676 Supplemental Figure S14D), and averaged the pixel intensities for the different compartments  
677 showing that overall, the inner regions were still brighter than the outer (Figure 8C).

678 Next, we performed a level-compartment bi-clustering on the pixel intensities of the aged disc  
679 MRIs, which was bound by disc level and compartment (Figure 8D). The findings resembled the  
680 proteomic clustering and PCA patterns (Figure 2; Supplemental Figure S6V-W). We performed a  
681 pixel intensity averaging of the disc compartments from the 3T images (Supplemental Figure 13B),  
682 and a level-compartment bi-clustering on the pixel intensities (Supplemental Figure S14C). While  
683 the clustering can clearly partition the inner from the outer disc compartments, the information  
684 value from each of the compartments is less due to the lower resolution of the MRI. In all, these  
685 results indicate a link between regional MRI landscapes and proteome profiles, prompting us to  
686 investigate their potential connections.

#### 687 *Proteome-wide associations with MRI landscapes reveals a hydration matrisome*

688 The MRI and the static proteome were done on the same specimens in both individuals, so we  
689 could perform proteome-wide associations with the MRI intensities. We detected 85 significantly  
690 correlated ECM proteins, hereby referred to as the hydration matrisome (Figure 8E). We found no  
691 collagen to be positively correlated with brighter MRI, which fits current understanding as  
692 collagens contribute to fibrosis and dehydration. Other classes of matrisome proteins were either  
693 positively or negatively correlated, with differential components for each class (Figure 8E).  
694 Positively correlated proteoglycans included EPYC, PRG4 (lubricin) and VCAN, consistent with  
695 their normal expression in a young disc and hydration properties. Negatively correlated proteins  
696 included OAF (TNC, SLRPs) and fibrotic (POSTN) markers (Figure 8E).

697 Given this MRI-proteome link and the greater dynamic ranges of MRI in the aged discs enabled  
698 by the higher resolution 7T MRIs (Figure 8D), we hypothesised that the hydration matrisome  
699 might be used to provide information about MRI intensities and thus disc hydration. To test this,  
700 we trained a LASSO regression model (Tibshirani, 1996) of the aged MRIs using the hydration  
701 matrisome (85 proteins), and applied the model to predict the intensity of the MRIs of the young

702 discs, based on the young proteome of the same 85 proteins. Remarkably, we obtained a PCC of  
703 0.689 ( $p=8.9\times 10^{-6}$ ; Spearman=0.776) between the actual and predicted MRI (Supplemental Figure  
704 S14E). The predicted MRI intensities of the young disc exhibited a smooth monotonic decrease  
705 from the NP towards IAF, then dropped suddenly towards the OAF (Figure 8F, right panel), with  
706 an ROC AUC (receiver operating characteristics, area under the curve) of 0.996 between IAF and  
707 OAF (Supplemental Figure S14F). In comparison, actual MRIs exhibited a linear decrease from  
708 NP to OAF (Figure 8F, left panel). On reviewing these two patterns, we argue that the predicted  
709 intensities may be a more faithful representation of the young discs' water contents than the actual  
710 MRI, as it reflects the gross images (Supplemental Figure S1A), PCA (Figure 3A) and Y1 modular  
711 trend in the young discs (Figure 3E). This exercise not only revealed the inherent connections  
712 between regional MRI and regional proteome, but also identified a set of ECM components that is  
713 predictive of MRI relating to disc hydration, which may be valuable for future clinical applications.

714

## 715 Discussion

716 Here, we present DIPPER – a human IVD proteomic resource comprising point-reference genome-  
717 wide profiles. The discovery dataset was established from intact lumbar discs of a young cadaver  
718 with no history of skeletal abnormalities (e.g. scoliosis), and an aged cadaver with reduced IVD  
719 MRI intensity and annular tears. Although these two individuals may not be representative of their  
720 respective age-groups, this is the first known attempt to achieve high spatial resolution profiles in  
721 the discs, adding a critical and much needed dimension to the current available IVD proteomic  
722 datasets. We showed that our spatiotemporal proteomes integrate well with the dynamic proteome  
723 and transcriptome of clinical samples, demonstrating their application values with other datasets.

724 In creating the point-references, we use a well-established protein extraction protocol (Onnerfjord  
725 et al., 2012b), and chromatographic fractionation of the peptides prior to mass spectrometry, we  
726 produced a dataset of the human intervertebral disc comprising 3,100 proteins, encompassing ~400  
727 matrisome and 2,700 non-matrisome proteins, with 1,769 proteins detected in 3 or more profiles,  
728 considerably higher than recent studies (Maseda et al., 2016; Rajasekaran et al., 2020; Ranjani et  
729 al., 2016; Sarath Babu et al., 2016). The high quality of our data enabled the application of unbiased  
730 approaches including PCA and ANOVA to reveal the relative importance of the phenotypic  
731 factors. Particularly, age was found to be the dominant factor influencing proteome profiles.

732 Comparisons between different compartments of the young disc produced a reference landscape  
733 containing known (KRT8/19 for the NP; COL1A1, CILP and COMP for the AF) and novel (FRZB,  
734 CHRDL2 for the NP; TNMD, SLRPs and SOD1 for the AF) markers. The young healthy  
735 discs were enriched for matrisome components consistent with a healthy functional young IVD.  
736 Despite morphological differences between NP and IAF, the inner disc compartments (NP,  
737 NP/IAF and IAF) display high similarities, in contrast to the large differences between IAF and  
738 OAF, which was consistent for discs from all lumbar disc levels. This morphological-molecular  
739 discrepancy might be accounted for by subtle differences in the ECM organisation, such as  
740 differences in GAG moieties on proteoglycans, or levels of glycosylation or other modifications  
741 of ECM that diversify function (Silagi et al., 2018). Nonetheless, we partitioned the detected  
742 proteins into a variable set that captures the diversity, and a constant set that lays the common  
743 foundation of all young compartments, which work in synergy to achieve disc function.

744 Clustering analysis of the 671 DEPs of the variable set identified 4 key modules (Y1-Y4). Visually,  
745 Y1 and Y2 mapped across the lateral and anteroposterior axes with opposing trends. Molecularly,  
746 module Y1 (NP) contained proteins promoting regulation of matrix remodelling, such as matrix  
747 degradation inhibitor MATN3 (Jayasuriya et al., 2012) and MMP inhibitor TIMP1. Inhibitors of  
748 WNT and BMP signalling were also present. Module Y2 (OAF) included COL1A1, THBS1/2/3,  
749 CILP1/CILP2 and TNMD, consistent with the OAF's tendon-like features (Nakamichi et al.,  
750 2018). It also included a set of SLRPs that might play roles in regulation of collagen assembly  
751 (Robinson et al., 2017; Taye et al., 2020), fibril alignment (Robinson et al., 2017), maturation and  
752 crosslinking (Kalamajski et al., 2016); while others are known to inhibit or promote TGF $\beta$   
753 signalling (Markmann et al., 2000). Notably, the composition of the IAF appeared to be a transition  
754 zone between NP and OAF rather than an independent compartment, as few proteins can  
755 distinguish it from adjacent compartments. Classes of proteins in both Y3 (smooth muscle feature)  
756 and Y4 (immune and blood) resemble Y2, which reflects the contractile property of the AF (Nakai  
757 et al., 2016) and the capillaries infiltrating or present at the superficial outer surface of the IVD.

758 In the aged disc, the change in the DEPs between the inner and outer regions of the discs suggests  
759 extensive changes in the inner compartment(s). Mapping the aged data onto modules Y1-Y4  
760 allowed a visualisation of the changes. The flattening of the Y1 and Y2 modules along both the  
761 lateral and anteroposterior axes indicated a convergence of the inner and outer disc. This is  
762 supported by the observed rapid decline of NP proteins and increase of AF proteins in the inner  
763 region. Fewer changes were seen in the aged OAF, which concurs with the notion that degenerative  
764 changes originate from the NP and radiate outwards, however, **infringement of IAF into the NP**  
765 cannot be excluded. The most marked change was seen in module Y4 (blood), where the pattern  
766 was inverted, characterised by high expression in the NP but low in OAF. While contamination  
767 cannot be excluded and there are reports that capillaries do not infiltrate the NP even in  
768 degeneration (Nerlich et al., 2007), our finding is consistent with other proteomic studies showing  
769 enrichment of blood proteins in pathological NP (Maseda et al., 2016). The route of infiltration  
770 can be from the fissured AF or cartilage endplates. Calcified endplates are more susceptible to  
771 microfractures, which can lead to blood infiltration into the NP (Sun et al., 2020). Of interest is  
772 the involvement of an immune response within the inner disc. This corroborates reports of  
773 inflammatory processes in ageing and degenerative discs, with the up-regulation of pro-

774 inflammatory cytokines and presence of inflammatory cells (Molinos et al., 2015; Wuertz et al.,  
775 2012).

776 The SILAC and degradome studies provided important insights into age-related differences in the  
777 biosynthetic and turnover activity in the IVD. The SILAC data indicated that protein synthesis is  
778 significantly impaired in aged degenerated discs. These findings correlate with reports of reduced  
779 cellularity in ageing (Rodriguez et al., 2011), which we have also ascertained by leveraging the  
780 relationship of histones and housekeeping genes with cell numbers. From the TAILS degradome  
781 analysis, we observed more cleaved protein fragments in aged compartments, particularly for  
782 structural proteins important for tissue integrity such as COMP and those involved in cell-matrix  
783 interactions such as FN1, which was coupled with the enrichment of the proteolytic process GO  
784 terms in the aged static proteome. Collectively, this reveals a systematic modification and  
785 replacement of the primary proteomic architecture of the young IVD with age that is associated  
786 with diminished or failure in functional properties in ageing or degeneration.

787 Despite known transcriptome-proteome discordance (Fortelny et al., 2017), our identification of  
788 concordant changes allow insights into active changes in the young and aged discs. For example,  
789 inhibitors of the WNT pathway and antagonists of BMP/TGF $\beta$  signalling (Leijten et al., 2013)  
790 were down regulated in the aged discs in both the proteome and transcriptome. Interestingly, the  
791 activation of these pathways is known to promote chondrocyte hypertrophy (Dong et al., 2006),  
792 and hypertrophy has been noted in IDD (Rutges et al., 2010). This suggests a model where the  
793 regulatory environment suppressing cellular hypertrophy changes with ageing or degeneration,  
794 resulting in conditions such as cellular senescence and tissue mineralisation that are part of the  
795 pathological process. In support, S100A1, a known inhibitor of chondrocyte hypertrophy (Saito et  
796 al., 2007) is down regulated, while chondrocyte hypertrophy markers *COL10A1* and *IBSP*  
797 (Komori, 2010) are up-regulated in the aged disc. Similar changes have been observed in ageing  
798 mouse NP (Veras et al., 2020) as well as in osteoarthritis (Zhu et al., 2009) where chondrocyte  
799 hypertrophy is thought to be involved in its aetiology (Ji et al., 2019; van der Kraan and van den  
800 Berg, 2012). Given that WNT inhibitors are already in clinical trials for osteoarthritis (Wang et  
801 al., 2019b), this may point to a prospective therapeutic strategy for IDD.



802 A key finding of our study is the direct demonstration, within a single individual, of association  
803 between the hydration status of the disc as revealed by MRI, and the matrix composition of  
804 the disc proteome. The remarkable correlation between predicted hydration states inferred from  
805 the spatial proteomic data and the high-definition phenotyping of the aged disc afforded by 7T  
806 MRI has enormous potential for understanding the molecular processes underlying IDD.

807 In conclusion, we have generated point-reference datasets of the young and aged disc proteome,  
808 at a significantly higher spatial resolution than previous works. By means of a methodological  
809 framework, we revealed compartmentalised information on the ECM composition and cellular  
810 activities, and their changes with ageing. Integration of this point-reference with additional age-  
811 and protein-specific information of synthesis/degradation help gain insights into the underlying  
812 molecular pathology of degeneration (Figure 8G & H). The richness of information in DIPPER  
813 makes it a valuable resource for cross referencing with human, animal and *in vitro* studies to  
814 evaluate clinical relevance and guide the development of therapeutics for human IDD.

815

816

## 817 **Materials and methods**

### 818 ***Cadaveric specimens***

819 Two human lumbar spines were obtained through approved regulations and governing bodies, with  
820 one young (16M) provided by L.H. (McGill University) and one aged (59M) from Articular  
821 Engineering, LLC (IL, USA). The young lumbar spine was received frozen as an intact whole  
822 lumbar spine. The aged lumbar spine was received frozen, dissected into bone-disc-bone segments.  
823 The cadaveric samples were stored at  $-80^{\circ}\text{C}$  until use.

### 824 ***Clinical specimens***

825 Clinical specimens were obtained with approval by the Institutional Review Board (references UW  
826 13-576 and EC 1516-00 11/01/2001) and with informed consent in accordance with the Helsinki  
827 Declaration of 1975 (revision 1983) from another 15 patients undergoing surgery for IDD, trauma  
828 or adolescent idiopathic scoliosis at Queen Mary Hospital (Hong Kong), and Duchess of Kent  
829 Children's Hospital (Hong Kong). Information of both the cadaveric and clinical samples are  
830 summarised in Table 1.

### 831 ***MRI imaging of cadaveric samples***

832 The discs were thawed overnight at  $4^{\circ}\text{C}$ , and then pre-equalised for scanning at room temperature.  
833 For the young IVD, these were imaged together as the lumbar spine was kept intact. T2-weighted  
834 and T1-weighted sagittal and axial MRI, T1-rho MRI and Ultrashort-time-to-echo MRI images  
835 were obtained using a 3T Philips Achieva 3.0 system at the Department of Diagnostic Radiology,  
836 The University of Hong Kong.

837 For the aged discs, the IVD were imaged separately as bone-disc-bone segments, at the Department  
838 of Electrical and Electronic Engineering, The University of Hong Kong. The MRS and CEST  
839 imaging were performed. The FOV for the CEST imaging was adjusted to  $76.8 \times 76.8 \text{ mm}^2$  to  
840 accommodate the size of human lumbar discs (matrix size =  $64 \times 64$ , slice thickness = 2 mm). All  
841 MRI experiments were performed at room temperature using a 7 T pre-clinical scanner (70/16  
842 Pharmascan, Bruker BioSpin GmbH, Germany) equipped with a 370 mT/m gradient system along

843 each axis. Single-channel volume RF coils with different diameters were used for the samples  
844 based on size (60 mm for GAG phantoms and human cadaveric discs).

#### 845 ***Image assessment of the aged lumbar IVD***

846 The MRI images in the transverse view were then assessed for intensity of the image (brighter  
847 signifying more water content). Three transverse MRI images per IVD were overlaid with a grid  
848 representing the areas that were cut for mass-spectrometry measurements as outlined previously.  
849 For each region, the ‘intensity’ was represented by the average of the pixel intensities, which were  
850 graphically visualised and used for correlative studies.

#### 851 ***Division of cadaveric IVD for mass spectrometry analysis***

852 The endplates were carefully cut off with a scalpel, exposing the surface of the IVD, which were  
853 then cut into small segments spanning seven segments in the central left-right lateral axis, and  
854 five segments in the central anteroposterior axis (Figure 1C). In all, this corresponds to a total of  
855 11 locations per IVD. Among them, 4 are from the OAF, 2 from the IAF (but only in the lateral  
856 axis), 1 from the central NP, and 4 from a transition zone between IAF and the NP (designated  
857 the ‘NP/IAF’). Samples were stored frozen at -80°C until use.

#### 858 ***SILAC by ex vivo culture of disc tissues***

859 NP and AF disc tissues from spine surgeries (Table 1) were cultured in custom-made Arg- and  
860 Lys-free  $\alpha$ -MEM (AthenaES) as per formulation of Gibco  $\alpha$ -MEM (Cat #11900-024),  
861 supplemented with 10% dialysed FBS (10,000 MWCO, Biowest, Cat# S181D),  
862 penicillin/streptomycin, 2.2 g/L sodium bicarbonate (Sigma), 30 mg/L L-methionine (Sigma), 21  
863 mg/L “heavy” isotope-labelled  $^{13}\text{C}_6$  L-arginine (Arg6, Cambridge Isotopes, Cat # CLM-2265-H),  
864 146 mg/L “heavy” isotope-labelled 4,4,5,5-D4 L-Lysine (Lys4, Cambridge Isotopes, Cat # DLM-  
865 2640). Tissue explants were cultured for 7 days in hypoxia (1%  $\text{O}_2$  and 5%  $\text{CO}_2$  in air) at 37°C  
866 before being washed with PBS and frozen until use.

#### 867 ***Protein extraction and preparation for cadaveric and SILAC samples***

868 The frozen samples were pulverised using a freezer mill (Spex) under liquid nitrogen. Samples  
869 were extracted using 15 volumes (w/v) of extraction buffer (4M guanidine hydrochloride (GuHCl),

870 50 mM sodium acetate, 100 mM 6-aminocaproic acid, and HALT protease inhibitor cocktail  
871 (Thermo Fischer Scientific), pH 5.8). Samples were mechanically dissociated with 10 freeze-thaw  
872 cycles and sonicated in a cold water bath, before extraction with gentle agitation at 4°C for 48  
873 hours. Samples were centrifuged at 15,000g for 30 minutes at 4°C and the supernatant was ethanol  
874 precipitated at a ratio of 1:9 for 16 hours at -20°C. The ethanol step was repeated and samples were  
875 centrifuged at 5000 g for 45 min at 4°C, and the protein pellets were air dried for 30 min.

876 Protein pellets were re-suspended in fresh 4M urea in 50 mM ammonium bicarbonate, pH 8, using  
877 water bath sonication to aid in the re-solubilisation of the samples. Samples underwent reduction  
878 with TCEP (5mM final concentration) at 60°C for 1 hr, and alkylation with iodoacetamide (500  
879 mM final concentration) for 20 min at RT. Protein concentration was measured using the BCA  
880 assay (Biorad) according to manufacturer's instructions. 200 µg of protein was then buffer  
881 exchanged with 50 mM ammonium bicarbonate with centricon filters (Millipore, 30 kDa cutoff)  
882 according to manufacturer's instructions. Samples were digested with mass spec grade  
883 Trypsin/LysC (Promega) as per manufacturer's instructions. For SILAC-labelled samples, formic  
884 acid was added to a final concentration of 1%, and centrifuged and the supernatant then desalted  
885 prior to LC-MS/MS measurements. For the cadaveric samples, the digested peptides were then  
886 acidified with TFA (0.1% final concentration) and quantified using the peptide quantitative  
887 colorimetric peptide assay kit (Pierce, catalogue 23275) before undergoing fractionation using the  
888 High pH reversed phase peptide fractionation kit (Pierce, catalogue number 84868) into four  
889 fractions. Desalted peptides, were dried, re-suspended in 0.1% formic acid prior to LC-MS/MS  
890 measurements.

### 891 ***Mass spectrometry for cadaveric and SILAC samples***

892 Samples were loaded onto the Dionex UltiMate 3000 RSLC nano Liquid Chromatography coupled  
893 to the Orbitrap Fusion Lumos Tribrid Mass Spectrometer. Peptides were separated on a commercial  
894 Acclaim C18 column (75 µm internal diameter × 50 cm length, 1.9 µm particle size; Thermo).  
895 Separation was attained using a linear gradient of increasing buffer B (80% ACN and 0.1% formic  
896 acid) and declining buffer A (0.1% formic acid) at 300 nL/min. Buffer B was increased to 30% B  
897 in 210 min and ramped to 40% B in 10 min followed by a quick ramp to 95% B, where it was held  
898 for 5 min before a quick ramp back to 5% B, where it was held and the column was re-equilibrated.

899 Mass spectrometer was operated in positive polarity mode with capillary temperature of 300°C.  
900 Full survey scan resolution was set to 120 000 with an automatic gain control (AGC) target value  
901 of  $2 \times 10^6$ , maximum ion injection time of 30 ms, and for a scan range of 400–1500 m/z. Data  
902 acquisition was in DDA mode to automatically isolate and fragment topN multiply charged  
903 precursors according to their intensities. Spectra were obtained at 30000 MS2 resolution with AGC  
904 target of  $1 \times 10^5$  and maximum ion injection time of 100 ms, 1.6 m/z isolation width, and  
905 normalised collisional energy of 31. Preceding precursor ions targeted for HCD were dynamically  
906 excluded of 50 s.

### 907 ***Label free quantitative data processing for cadaveric samples***

908 Raw data were analysed using MaxQuant (v.1.6.3.3, Germany). Briefly, raw files were searched  
909 using Andromeda search engine against human UniProt protein database (20,395 entries, Oct  
910 2018), supplemented with sequences of contaminant proteins. Andromeda search parameters for  
911 protein identification were set to a tolerance of 6 ppm for the parental peptide, and 20 ppm for  
912 fragmentation spectra and trypsin specificity allowing up to 2 miscleaved sites. Oxidation of  
913 methionine, carboxyamidomethylation of cysteines was specified as a fixed modification. Minimal  
914 required peptide length was specified at 7 amino acids. Peptides and proteins detected by at least  
915 2 label-free quantification (LFQ) ion counts for each peptide in one of the samples were accepted,  
916 with a false discovery rate (FDR) of 1%. Proteins were quantified by normalised summed peptide  
917 intensities computed in MaxQuant with the LFQ option enabled. A total of 66 profiles were  
918 obtained: 11 locations  $\times$  3 disc levels  $\times$  2 individuals; with a median of 665 proteins (minimum  
919 419, maximum 1920) per profile.

### 920 ***Data processing for SILAC samples***

921 The high resolution, high mass accuracy mass spectrometry (MS) data obtained were processed  
922 using Proteome Discoverer (Ver 2.1), wherein data were searched using Sequest algorithm against  
923 Human UniProt database (29,900 entries, May 2016), supplemented with sequences of  
924 contaminant proteins, using the following search parameters settings: oxidized methionine (M),  
925 acetylation (Protein N-term), heavy Arginine (R6) and Lysine (K4) were selected as dynamic  
926 modifications, carboxyamidomethylation of cysteines was specified as a fixed modification,  
927 minimum peptide length of 7 amino acids was enabled, tolerance of 10 ppm for the parental

928 peptide, and 20 ppm for fragmentation spectra, and trypsin specificity allowing up to 2 miscleaved  
929 sites. Confident proteins were identified using a target-decoy approach with a reversed database,  
930 strict FDR 1% at peptide and PSM level. Newly synthesised proteins were heavy labelled with  
931 Arg6- and Lys4 and the data was expressed as the normalised protein abundance obtained from  
932 heavy (labelled)/light (un-labelled) ratio.

### 933 ***Degradome sample preparation, mass spectrometry and data processing***

934 Degradome analyses was performed on NP and AF from three non-degenerated and three  
935 degenerated individuals (Table 1). Frozen tissues were pulverised as described above and prepared  
936 for TAILS as previously reported (Kleifeld et al., 2010). After extraction with SDS buffer (1%  
937 SDS, 100 mM dithiothreitol, 1X protease inhibitor in deionised water) and sonication (three cycles,  
938 15s/cycle), the supernatant (soluble fraction) underwent reduction at 37<sup>0</sup>C and alkylation with a  
939 final concentration of 15mM iodoacetamide for 30 min at RT. Samples were precipitated using  
940 chloroform/methanol, and the protein pellet air dried. Samples were re-suspended in 1M NaOH,  
941 quantified by nanodrop, diluted to 100mM HEPES and 4M GnHCl and pH adjusted pH6.5-7.5)  
942 prior to 6-plex TMT labelling as per manufacturer's instructions (Sixplex TMT, Cat# 90061,  
943 ThermoFisher Scientific). Equal ratios of TMT-labelled samples were pooled and  
944 methanol/chloroform precipitated. Protein pellets were air-dried and re-suspended in 200mM  
945 HEPES (pH8), and digested with trypsin (1:100 ratio) for 16 hr at 37<sup>0</sup>C, pH 6.5 and a sample was  
946 taken for pre-TAILS. High-molecular-weight dendritic polyglycerol aldehyde polymer (ratio of  
947 5:1 w/w polymer to sample) and NaBH<sub>3</sub>CN (to a final concentration of 80 mM) was added,  
948 incubated at 37<sup>0</sup>C for 16 hr, followed by quenching with 100 mM ethanolamine (30 min at 37<sup>0</sup>C)  
949 and underwent ultrafiltration (MWCO of 10,000). Collected samples were desalted, acidified to  
950 0.1% formic acid and dried, prior to MS analysis.

951 Samples were analysed on a Thermo Scientific Easy nLC-1000 coupled online to a Bruker  
952 Daltonics Impact II UHR QTOF. Briefly, peptides were loaded onto a 20cm x 75µm I.D. analytical  
953 column packed with 1.8µm C18 material (Dr. Maisch GmbH, Germany) in 100% buffer A (99.9%  
954 H<sub>2</sub>O, 0.1% formic acid) at 800 bar followed by a linear gradient elution in buffer B (99.9%  
955 acetonitrile, 0.1% formic acid) to a final 30% buffer B for a total 180 min including washing with  
956 95% buffer B. Eluted peptides were ionized by ESI and peptide ions were subjected to tandem MS

957 analysis using a data-dependent acquisition method. A top17 method was employed, where the top  
958 17 most intense multiply charged precursor ions were isolated for MS/MS using collision-induced-  
959 dissociation, and actively excluded for 30s.

960 MGF files were extracted and searched using Mascot against the UniProt Homo sapiens database,  
961 with semi-ArgC specificity, TMT6plex quantification, variable oxidation of methionine, variable  
962 acetylation of N termini, 20 ppm MS1 error tolerance, 0.05 Da MS2 error tolerance and 2 missed  
963 cleavages. Mascot .dat files were imported into Scaffold Q+S v4.4.3 for peptide identification  
964 processing to a final FDR of 1%. Quantitative values were calculated through Scaffold and used  
965 for subsequent analyses.

### 966 ***Transcriptomic samples: isolation, RNA extraction and data processing***

967 AF and NP tissues from 4 individuals were cut into approximately 0.5cm<sup>3</sup> pieces, and put into the  
968 Dulbecco's modified Eagle's medium (DMEM) (Gibco) supplemented with 20 mM HEPES  
969 (USB), 1% penicillin-streptomycin (Gibco) and 0.4% fungizone (Gibco). The tissues were  
970 digested with 0.2% pronase (Roche) for 1 hour, and centrifuged at 200 g for 5 min to remove  
971 supernatant. AF and NP were then digested by 0.1% type II collagenase (Worthington  
972 Biochemical) for 14 hours and 0.05% type II collagenase for 8 hours, respectively. Cell suspension  
973 was filtered through a 70 µm cell strainer (BD Falcon) and centrifuged at 200 g for 5 min. The cell  
974 pellet was washed with phosphate buffered saline (PBS) and centrifuged again to remove the  
975 supernatant. RNA was then extracted from the isolated disc cells using Absolutely RNA Nanoprep  
976 Kit (Stratagene), following manufacturer's protocol, and stored at -80°C until further processing.

977 The quality and quantity of total RNA were assessed on the Bioanalyzer (Agilent) using the RNA  
978 6000 Nano total RNA assay. cDNA was generated using Affymetrix GeneChip Two-Cycle cDNA  
979 Synthesis Kit, followed by *in vitro* transcription to produce biotin-labelled cRNA. The sample was  
980 then hybridised onto the Affymetrix GeneChip Human Genome U133 Plus 2.0 Array. The array  
981 image, CEL file and other related files were generated using Affymetrix GeneChip Command  
982 Console. The experiment was conducted as a service at the Centre for PanorOmic Sciences of the  
983 University of Hong Kong.



984 CEL and other files were loaded into GeneSpring GX 10 (Agilent) software. The RMA algorithm  
985 was used for probe summation. Data were normalised with baseline transformed to median of all  
986 samples. A loose filtering based on the raw intensity values was then applied to remove  
987 background noise. Consequently, transcriptomic data with a total of 54,675 probes (corresponding  
988 to 20,887 genes) and 8 profiles were obtained.

### 989 ***Bioinformatics and functional analyses***

990 The detected proteins were compared against the transcription factor (TF) database (Vaquerizas et  
991 al., 2009) and the human genome nomenclature consortium database for cell surface markers  
992 (CDs) (Braschi et al., 2019), where 77 TFs and 83 CDs were detected (Supplemental Figure S3A).  
993 Excluding missing values, the LFQ levels among the data-points range from 15.6 to 41.1, with a  
994 Gaussian-like empirical distribution (Supplemental Figure S5A). The numbers of valid values per  
995 protein were found to decline rapidly when they were sorted in descending order (Supplemental  
996 Figure S5B, upper panel). To perform principal component analyses (PCAs), only a subset of  
997 genes with sufficiently large numbers of valid values (i.e. non-missing values) were used. The cut-  
998 off for this was chosen based on a point corresponding to the steepest slope of descending order  
999 of valid protein numbers (Supplemental Figure S5B, second panel), such that the increase of valid  
1000 values is slower than the increase of missing values beyond that point. Subsequently, the top 507  
1001 genes were picked representing 59.8% of all valid values. This new subset includes 12.4% of all  
1002 missing values. Since the subset of data still contains some missing values, an imputation strategy  
1003 was adopted employing the Multiple Imputation by Chained Equations (MICE) method and  
1004 package (van Buuren and Groothuis-Oudshoorn, 2011), with a max iteration set at 50 and the  
1005 default PMM method (predictive mean matching). To further ensure normality, Winsorisation was  
1006 applied such that genes whose average is below 5% or above 95% of all genes were also excluded  
1007 from PCA. The data was then profile-wise standardised (zero-mean and 1 standard deviation)  
1008 before PCA was applied on the R platform (Team, 2013).

1009 To assess the impact of the spatiotemporal factors on the proteomic profiles, we performed  
1010 Analysis of Variance (ANOVA), correlating each protein to the age, compartments, level, and  
1011 directionality. To draw the soft boundaries on the PCA plot between groups of samples, support  
1012 vector machines with polynomial (degree of 2) kernel were applied using the LIBSVM package

1013 (Chang and Lin, 2011) and the PCA coordinates as inputs for training. A meshed grid covering the  
1014 whole PCA field was created to make prediction and draw probability contours for -0.5, 0, and 0.5  
1015 from the fitted model. Hierarchical clustering was performed with (1- correlation coefficient) as  
1016 the distance metrics unless otherwise specified.

1017 To address the problem of ‘dropout’ effects while avoiding extra inter-dependency introduced due  
1018 to imputations, we adopted three strategies in calculating the differentially expressed proteins  
1019 (DEPs), namely, by statistical testing, exclusively detected, and fold-change cutoff approaches.  
1020 First, for the proteins that have over half valid values in both groups under comparison, we  
1021 performed t-testing with p-values adjusted for multiple testing by the false discovery rate (FDR).  
1022 Those with FDR below 0.05 were considered statistical DEPs. Second, for the proteins where one  
1023 group has some valid values while the other group is completely not detected, we considered the  
1024 ones with over half valid values in one group to be exclusive DEPs. For those proteins that were  
1025 expressed in <50% in both groups, the ones with fold-change greater than 2 were also considered  
1026 to be DEPs.

1027 To fit the lateral and anteroposterior trends for the modules of genes identified in the young  
1028 samples, a Gaussian Process Estimation (GPE) model was trained using the GauPro package in R  
1029 (Team, 2013). Pathway analyses was conducted on the GSEA (Subramanian et al., 2005).  
1030 Signalling proteins was compiled based on 25 Signal transduction pathways listed on KEGG  
1031 (Kanehisa et al., 2019).

1032 For transcriptomic data, we used a thresholding approach to detect DEGs (differentially expressed  
1033 genes), whereby a gene was considered a DEG if the  $\log_2(\text{fold-change})$  is greater than 3 and the  
1034 average expression (logarithmic scale) is greater than 10 (Supplemental Figure S11E-H).

1035 The LASSO model between MRI and proteome was trained using the R package “glmnet”,  
1036 wherein the 85 ECMs were first imputed for missing values in them using MICE. Nine ECMs  
1037 were not imputed for too many missing values, leaving 76 for training and testing. The best value  
1038 for  $\lambda$  was determined by cross-validations. A model was then trained on the aged MRIs (dependent  
1039 variable) and aged proteome of the 76 genes (independent variable). The fitted model was then  
1040 applied to the young proteome to predict MRIs of the young discs.

1041 ***Raw data depository and software availability***

1042 The mass spectrometry proteomics data have been deposited to the ProteomeXchange Consortium  
1043 via the PRIDE (Vizcaino et al., 2016) repository with the following dataset identifiers for cadaver  
1044 samples (PXD017774), SILAC samples (PXD018193), and degradome samples  
1045 (PXD018298000). The RAW data for the transcriptome data has been deposited on NCBI GEO  
1046 with accession number GSE147383. The custom scripts for processing and analysing the data were  
1047 housed at [github.com/hkudclab/DIPPER](https://github.com/hkudclab/DIPPER). An interactive web interface for the data is available at  
1048 [sbms.hku.hk/dclab/DIPPER](https://sbms.hku.hk/dclab/DIPPER) .

1049 **Tables**

1050 **Table 1.** Summary of disc samples in DIPPER.

| <b>Samples</b>               | <b>Age</b> | <b>Sex</b> | <b>Disc level/s</b> | <b>Disc regions</b>  | <b>Reason for surgery</b> |
|------------------------------|------------|------------|---------------------|----------------------|---------------------------|
| <b>Cadaver samples</b>       |            |            |                     |                      |                           |
| Young spine                  | 16         | M          | L3/4, L4/5, L5/S1   | NP, NP/IAF, IAF, OAF | N/A                       |
| Aged spine                   | 59         | M          | L3/4, L4/5, L5/S1   | NP, NP/IAF, IAF, OAF | N/A                       |
| <b>Transcriptome samples</b> |            |            |                     |                      |                           |
| YND74                        | 17         | M          | L1/2                | NP, OAF              | Scoliosis                 |
| YND88                        | 16         | M          | L1/2                | NP, OAF              | Scoliosis                 |
| AGD40                        | 62         | F          | L4/5                | NP, OAF              | Degeneration              |
| AGD45                        | 47         | M          | L4/5                | NP, OAF              | Degeneration              |
| <b>SILAC samples</b>         |            |            |                     |                      |                           |
| YND148                       | 19         | F          | L2/3                | OAF                  | Scoliosis                 |
| YND149                       | 15         | F          | L1/2                | OAF                  | Scoliosis                 |
| YND151                       | 15         | F          | L1/2                | NP, OAF              | Scoliosis                 |
| YND152                       | 14         | F          | L1/2                | NP, OAF              | Scoliosis                 |
| AGD80                        | 63         | M          | L4/5                | NP, OAF              | Degeneration              |
| <b>Degradome samples</b>     |            |            |                     |                      |                           |
| YND136                       | 17         | F          | L1/2                | NP, OAF              | Scoliosis                 |
| YND141                       | 20         | F          | L1/2                | NP, OAF              | Scoliosis                 |
| AGD143                       | 53         | M          | L1/2                | NP, OAF              | Trauma                    |
| AGD62                        | 55         | F          | L5/S1               | NP, OAF              | Degeneration              |
| AGD65                        | 68         | F          | L4/5                | NP, OAF              | Degeneration              |
| AGD67                        | 55         | M          | L4/5                | NP, OAF              | Degeneration              |

1051

1052 **Table 2.** Commonly expressed ECM and associated proteins across all 66 profiles in the spatial  
 1053 proteome.

| <b>Categories<br/>(Number of proteins)</b> | <b>Protein names</b>                                                                                                                                                                                           |
|--------------------------------------------|----------------------------------------------------------------------------------------------------------------------------------------------------------------------------------------------------------------|
| <b>Core matrisome</b>                      |                                                                                                                                                                                                                |
| Collagens (13)                             | COL1A1/2, COL2A1, COL3A1, COL5A1, COL6A1/2/3, COL11A1/2, COL12A1, COL14A1, COL15A1                                                                                                                             |
| Proteoglycans (14)                         | ACAN, ASPN, BGN, CHAD, DCN, FMOD, HAPLN1, HSPG2, LUM, OGN, OMD, PRELP, PRG4, VCAN                                                                                                                              |
| Glycoproteins (34)                         | ABI3BP, AEBP1, CILP, CILP2, COMP, DPT, ECM2, EDIL3, EFEMP2, EMILIN1, FBN1, FGA, FGB, FN1, FNDC1, LTBP2, MATN2/3, MFGE8, MXRA5, NID2, PCOLCE, PCOLCE2, PXDN, SMOC1/2, SPARC, SRPX2, TGFBI, THBS1/2/4, TNC, TNXB |
| <b>Other matrisome</b>                     |                                                                                                                                                                                                                |
| ECM affiliated proteins (10)               | ANXA1/2/4/5/6, CLEC11A, CLEC3A/B, CSPG4, SEMA3C                                                                                                                                                                |
| ECM regulators (16)                        | A2M, CD109, CST3, F13A1, HTRA1, HTRA3, ITIH5, LOXL2/3, PLOD1, SERPINA1/3/5, SERPINE2, SERPING1, TIMP1                                                                                                          |
| Secreted factors (2)                       | ANGPTL2, FGF2                                                                                                                                                                                                  |

1054

1055 **Supplemental Tables**

1056 **Supplemental Table 1.** Processed data of the 66 LC-MS/MS static spatial proteome profiles, the  
1057 8 heavy-to-light ratios of the SILAC data, the 12 degradome profiles, and the 8 transcriptomic  
1058 profiles.

1059 **Supplemental Table 2.** Differentially expressed proteins (DEPs) among pairs of sample groups  
1060 within the 33 young static spatial disc profiles.

1061 **Supplemental Table 3.** Differentially expressed proteins (DEPs) among pairs of sample groups  
1062 within the 33 aged static spatial disc profiles.

1063 **Supplemental Table 4.** Differentially expressed proteins (DEPs) between young and aged  
1064 sample groups of static spatial proteomes.

1065 **Supplemental Table 5.** Significantly enriched gene ontology (GO) terms associated with  
1066 proteins expressed higher in all young or all aged discs.

1067

1068 **Figure legends**

1069 **Figure 1.** Outline of samples, workflow, MRI, and global overview of data in DIPPER.

1070 (A) Schematic diagram showing the structure of the samples, data types, and flow of analyses  
1071 in DIPPER.  $n$  is the number of individuals.  $N$  is the number of genome-wide profiles.

1072 (B) Clinical T2-weighted MRI images (3T) of the young lumbar discs in the sagittal and  
1073 transverse plane (left and right panels), T1 MRI image of the young lumbar spine (middle  
1074 panel).

1075 (C) High resolution (7T) T2-weighted MRI of the aged lower lumbar spine in sagittal (left  
1076 panel) and transverse plane (right panel).

1077 (D) Diagram showing the anatomy of the IVD and locations from where the samples were  
1078 taken. VB: vertebral body; NP, nucleus pulposus; AF, annulus fibrosus; IAF: inner AF;  
1079 OAF: outer AF; NP/IAF: a transition zone between NP and IAF.

1080 (E) Venn diagrams showing the overlap of detected proteins in the four major compartments.  
1081 Top panel, young and aged profiles; middle, young only; bottom, aged only.

1082 (F) Barchart showing the numbers of proteins detected per sample, categorised into  
1083 matrixome (coloured) or non-matrixome proteins (grey).

1084 (G) Barcharts showing the composition of the matrixome and matrixome-associated proteins.  
1085 Heights of bars indicate the number of proteins in each category expressed per sample.  
1086 The N number in brackets indicate the aggregate number of proteins.

1087 (H) Violin plots showing the level of sub-categories of ECMs in different compartments of  
1088 the disc. The green number on top of each violin shows its median. LFQ: Label Free  
1089 Quantification.

1090 (I) Top 30 HGNC gene families for all non-matrixome proteins detected in the dataset.

1091 (J) Violin plots showing the averaged expression levels of 10 detected histones across the  
1092 disc compartments and age-groups.

1093 (K) Scatter-plot showing the co-linearity between GAPDH and histones.

1094 **Figure 2.** Principle component analysis (PCA) of the 66 static spatial profiles based on a set of  
1095 507 genes selected by optimal cut-off (see Supplemental Figure S5A-C).

1096 (A) Scatter-plot of PC1 and PC2 color-coded by compartments, and dot-shaped by age-  
1097 groups. Solid curves are the support vector machines (SVMs) decision boundaries



- 1098 between inner disc regions (NP, NP/IAF, IAF) and OAF, and dashed curves are soft  
1099 boundaries for probability equal to  $\pm 0.5$  and are applied to all plots in this figure.
- 1100 (B) Scatter-plot of PC1 and PC2 color-coded by disc levels. The SVM boundaries are trained  
1101 between L5/S1 and upper levels (L3/4 and L4/5).
- 1102 (C) Scatter-plot of PC1 and PC3, color-coded by disc compartments. The SVM boundaries  
1103 are trained between inner disc regions and OAF.
- 1104 (D) Scatter-plot of PC1 and PC3, color-coded by disc levels. The SVM boundaries are  
1105 trained between L5/S1 and upper levels (L3/4 and L4/5).
- 1106 (E) Top 100 positively and negatively correlated genes with PC1, color-coded by ECM  
1107 categories.
- 1108 (F) Top 100 positively and negatively correlated genes with PC2, color-coded by ECM  
1109 categories.
- 1110 (G) Top 100 positively and negatively correlated genes with PC3, color-coded by ECM  
1111 categories.

1112 **Figure 3.** Delineating the young and healthy discs' static spatial proteome.

- 1113 (A) PCA plot of all 33 young profiles. Curves in the upper panel show the SVM boundaries  
1114 between the OAF and inner disc regions, those in the lower panel separate the L5/S1 disc  
1115 from the upper disc levels. L, left; R, right; A, anterior; P, posterior.
- 1116 (B) A schematic illustrating the partitioning of the detected human disc proteome into  
1117 variable and constant sets.
- 1118 (C) A histogram showing the distribution of non-DEPs in terms of their detected frequencies  
1119 in the young discs. Only 245 non-DEP proteins were detected in over 16 profiles, which  
1120 is thus defined to be the constant set; while the remaining  $\sim 1,000$  proteins were  
1121 considered marginally detected.
- 1122 (D) Piecharts showing the ECM compositions in the variable (left) and constant (right) sets.  
1123 The constant set proteins that were detected in all 33 young profiles are listed at the  
1124 bottom.
- 1125 (E) Normalised expression (Z-scores) of proteins in the young module Y1 (NP signature)  
1126 laterally (top panel) and anteroposteriorly (bottom panel), for all three disc levels  
1127 combined. The red curve is the Gaussian Process Estimation (GPE) trendline, and the  
1128 blue curves are 1 standard deviation above or below the trendline.

- 1129 (F) Lateral trends of module Y2 (AF signature) for each of the three disc levels.  
1130 (G) Lateral trends of module Y3 (Smooth muscle cell signature) for each of the three disc  
1131 levels.  
1132 (H) Lateral trends of module Y4 (Immune and blood) for each of the three disc levels.  
1133 (I) Volcano plot of differentially expressed proteins (DEPs) between OAF and inner disc (an  
1134 aggregate of NP, NP/IAF, IAF), with coloured dots representing DEPs.  
1135 (J) A functional categorisation of the DEPs in (I).

1136 **Figure 4.** Characterisation of the aged discs' static spatial proteome.

- 1137 (A) PCA plot of all the aged profiles on PC1 and PC2, color-coded by compartments. Curves  
1138 in the left panel show the SVM boundaries between OAF and inner disc; those in the  
1139 right panel separate the L5/S1 disc from the upper disc levels. Letters on dots indicate  
1140 directions: L, left; R, right; A, anterior; P, posterior.  
1141 (B) Volcano plot showing the DEPs between the OAF and inner disc (an aggregate of NP,  
1142 NP/IAF and IAF), with the coloured dots representing statistically significant  
1143 (FDR<0.05) DEPs.  
1144 (C) Using the same 4 modules identified in young samples, we determined the trend for these  
1145 in the aged samples. Locational trends of module Y1 showing higher expression in the  
1146 inner disc, albeit they are more flattened than in the young disc samples. Top panel shows  
1147 left to right direction and bottom panel shows anterior to posterior direction. The red  
1148 curve is the Gaussian Process Estimation (GPE) trendline, and the blue curves are 1  
1149 standard deviation above or below the trendline. This also applies to (D), (E) and (F).  
1150 (D) Lateral trends for module Y2 in the aged discs.  
1151 (E) Lateral trends for module Y3 in the aged discs.  
1152 (F) Lateral trends for module Y4 in the aged discs.

1153 **Figure 5.** Comparison between young and aged static spatial proteomes.

- 1154 (A) Volcano plot showing the DEPs between all the 33 young and 33 aged profiles. Coloured  
1155 dots represent statistically significant DEPs.  
1156 (B) GO term enrichment of DEPs higher in young profiles.

- 1157 (C) GO term enrichment of DEPs higher in aged profiles. Full names of GO terms in (B) and  
1158 (C) are listed in Supplemental Table S5.
- 1159 (D) Volcano plot showing DEPs between aged and young inner disc regions.
- 1160 (E) Volcano plot showing DEPs between aged and young OAF.
- 1161 (F) Venn diagram showing the partitioning of the young/aged DEPs that were down-  
1162 regulated in aged discs, into contributions from inner disc regions and OAF.
- 1163 (G) Venn diagram showing the partitioning of the young/aged DEPs that were up-regulated  
1164 in aged discs, into contributions from inner disc regions and OAF.
- 1165 (H) A heat map showing proteins expressed in all young and aged disc, with the  
1166 identification of 6 modules (module 1: higher expression in young inner disc regions,  
1167 modules 2 and 4: higher expression in young OAF, module 3: highly expressing in aged  
1168 OAF, module 5: higher expression across all aged samples, and module 6: higher  
1169 expression in aged inner disc, and some OAF).
- 1170 (I) An alluvial chart showing the six modules identified in (H) and their connections to the  
1171 previously identified four modules and constant set in the young reference proteome; as  
1172 well as their connections to enriched GO terms.

1173 **Figure 6.** Concordance between static spatial proteomic and transcriptome data.

- 1174 (A) A PCA plot of the 8 transcriptomic profiles. Curves represent SVM boundaries between  
1175 patient-groups or compartments.
- 1176 (B) Venn diagrams showing the partitioning of the young/aged DEGs into contributions from  
1177 inner disc regions and OAF. Left: down-regulated in AGD samples; right: up-regulated.
- 1178 (C) Transcriptome data from the NP and AF of two young individuals were compared to the  
1179 proteomic data, with coloured dots representing identified proteins also expressed at the  
1180 transcriptome level.
- 1181 (D) Transcriptome and proteome comparison of aged OAF and NP.
- 1182 (E) Transcriptome and proteome comparison of young and aged OAF.
- 1183 (F) Transcriptome and proteome comparison of young and aged NP.

1184 **Figure 7.** The dynamic proteome of the intervertebral disc shows less biosynthesis of proteins in  
1185 aged tissues.

- 1186 (A) Schematic showing pulse-SILAC labelling of *ex-vivo* cultured disc tissues where heavy  
1187 Arg and Lys are incorporated into newly made proteins (heavy), and pre-existing proteins  
1188 remaining unlabelled (light). NP and AF tissues from young (n=3) and aged (n=1) were  
1189 cultured for 7 days in hypoxia prior to MS.
- 1190 (B) Barcharts showing the number of identified non-matrisome (grey) and matrisome  
1191 (coloured) existing proteins (middle panel); newly synthesised proteins (left panel), and  
1192 the heavy/light ratio (right panel) for each of the samples.
- 1193 (C) The quantities of each of the heavy labelled (newly synthesised) proteins identified for  
1194 each of the four groups were averaged, and then plotted in descending order of  
1195 abundance. It shows that YND AF and NP synthesise higher numbers of proteins than the  
1196 AGD AF and NP. The red dotted reference line shows the expression of GAPDH.
- 1197 (D) The quantities of each of the light (existing) proteins identified for each group was  
1198 averaged, and then plotted in descending order of abundance which shows that there are  
1199 similar levels of existing proteins in the four pooled samples.
- 1200 (E) The matrisome proteins of (C) were singled out for display. The abundance of these  
1201 proteins in YND samples were generally higher across all types of matrisome proteins  
1202 than the AGD, with the exceptions of aged related proteins.
- 1203 (F) Schematic showing the workflow of degradome analysis by N-terminal amine isotopic  
1204 labelling (TAILS) for the identification of cleaved neo N-terminal peptides.
- 1205 (G) Heatmap showing the identification of cleaved proteins ranked according to tandem mass  
1206 tag (TMT) isobaric labelling of N-terminal peptides in NP. Data is expressed as the  
1207  $\log_2(\text{ratio})$  of N-terminal peptides.
- 1208 (H) Heatmap showing the identification of cleaved proteins ranked according to tandem mass  
1209 tag (TMT) isobaric labelling of N-terminal peptides in AF. Data is expressed as the  
1210  $\log_2(\text{ratio})$  of N-terminal peptides. AGD143 in (G) and (H) is aged but not degenerated  
1211 (trauma).

1212 **Figure 8.** MRI intensities and their correlation with the proteomic data.

- 1213 (A) The middle MRI stack of each disc level in the aged cadaveric sample.  
1214 (B) Schematic of the disc showing the three stacks of MRI images per disc.

- 1215 (C) Violin plots showing the pixel intensities within each location per disc level,  
1216 corresponding to the respective locations taken for mass spectrometry measurements.  
1217 Each violin-plot is the aggregate of three stacks of MRIs per disc.
- 1218 (D) A heatmap bi-clustering of levels and compartments based on the MRI intensities.
- 1219 (E) The hydration ECMs: the ECM proteins most positively and negatively correlated with  
1220 MRI.
- 1221 (F) The 3T MRI intensities of the young discs across the compartments (left), and the  
1222 predicted MRI intensities based on a LASSO regression model trained on the hydration  
1223 ECMs (right).
- 1224 (G) A water-tank model of the dynamics in disc proteomics showing the balance of the  
1225 proteome is maintained by adequate anabolism to balance catabolism.
- 1226 (H) Diagram showing the partitioning of the detected proteins into variable and constant sets,  
1227 whereby four modules characterising the young healthy disc were further derived; and  
1228 showing their changes with ageing. SMC: smooth muscle cell markers.

1229 **Author contributions**

1230 VT handled IRB/IC, coordinated MRI measurements, performed tissue dissection, sample  
1231 preparation, data processing (MaxQuant), analyses (Perseus) and interpretation, prepared figures.  
1232 PKC performed bioinformatics analyses (ANOVA, PCA, SVM, DEGs, GPE, LASSO), and  
1233 prepared figures. VT and PKC wrote the first draft of the manuscript. AY generated the microarray  
1234 data. RS, NS and TK performed the mass spectrometry and processed the data, supervised and  
1235 funded by CMO. MK, PS and WC were involved in interpretation. LH provided the young spine  
1236 and interpreted the data. KC provided critical input, interpreted results and was involved in writing.  
1237 DC conceived ideas, supervised the project, interpreted data and results, wrote the manuscript. All  
1238 authors contributed to writing and approved the manuscript.

1239 **Acknowledgments**

1240 We thank Dr Ed Wu and Dr Anna Wang of the Dept of EEE at HKU for performing the high-  
1241 resolution MRI on the aged discs. We thank Dr Dino Samartzis for arranging the MRI of the young  
1242 lumbar spine, and Prof. Kenneth Cheung and Dr Jason Cheung for collecting surgical disc  
1243 specimens. Part of this work was supported by the Theme-based Research Scheme (T12-708/12N)  
1244 and Area of Excellence (AoE/M-04/04) of the Hong Kong Research Grants (RGC) Council  
1245 awarded to KSEC (Project Coordinator and PI) and DC (co-PI), the RGC European Union - Hong  
1246 Kong Research and Innovation Cooperation Co-funding Mechanism (E-HKU703/18) awarded to  
1247 DC, and by the Ministry of Science and Technology of the People's Republic of China: National  
1248 Strategic Basic Research Program ("973") (2014CB942900) awarded to DC. The TAILS analyses  
1249 were supported by a Canadian Institutes of Health Research Foundation Grant FDN-148408 to  
1250 CMO, who holds a Canada Research Chair in Protease Proteomics and Systems Biology.

1251

## 1252 References

- 1253 Anderson, R.M., Lawrence, A.R., Stottmann, R.W., Bachiller, D., and Klingensmith, J. (2002). Chordin  
1254 and noggin promote organizing centers of forebrain development in the mouse. *Development* *129*,  
1255 4975-4987.
- 1256 Barber, R.D., Harmer, D.W., Coleman, R.A., and Clark, B.J. (2005). GAPDH as a housekeeping gene:  
1257 analysis of GAPDH mRNA expression in a panel of 72 human tissues. *Physiol Genomics* *21*, 389-  
1258 395.
- 1259 Bizet, A.A., Liu, K., Tran-Khanh, N., Saksena, A., Vorstenbosch, J., Finnson, K.W., Buschmann, M.D.,  
1260 and Philip, A. (2011). The TGF-beta co-receptor, CD109, promotes internalization and degradation  
1261 of TGF-beta receptors. *Biochim Biophys Acta* *1813*, 742-753.
- 1262 Braschi, B., Denny, P., Gray, K., Jones, T., Seal, R., Tweedie, S., Yates, B., and Bruford, E. (2019).  
1263 Genenames.org: the HGNC and VGNC resources in 2019. *Nucleic Acids Res* *47*, D786-D792.
- 1264 Chang, C.C., and Lin, C.J. (2011). LIBSVM: A Library for Support Vector Machines. *Acm T Intel Syst*  
1265 *Tec* *2*.
- 1266 Chen, J., Yan, W., and Setton, L.A. (2006). Molecular phenotypes of notochordal cells purified from  
1267 immature nucleus pulposus. *Eur Spine J* *15 Suppl* *3*, S303-311.
- 1268 Dong, Y.F., Soung do, Y., Schwarz, E.M., O'Keefe, R.J., and Drissi, H. (2006). Wnt induction of  
1269 chondrocyte hypertrophy through the Runx2 transcription factor. *J Cell Physiol* *208*, 77-86.
- 1270 Feng, H., Danfelter, M., Stromqvist, B., and Heinegard, D. (2006). Extracellular matrix in disc  
1271 degeneration. *J Bone Joint Surg Am* *88 Suppl* *2*, 25-29.
- 1272 Fortelny, N., Overall, C.M., Pavlidis, P., and Freue, G.V.C. (2017). Can we predict protein from mRNA  
1273 levels? *Nature* *547*, E19-E20.
- 1274 Fujita, N., Miyamoto, T., Imai, J., Hosogane, N., Suzuki, T., Yagi, M., Morita, K., Ninomiya, K.,  
1275 Miyamoto, K., Takaishi, H., *et al.* (2005). CD24 is expressed specifically in the nucleus pulposus  
1276 of intervertebral discs. *Biochem Biophys Res Commun* *338*, 1890-1896.
- 1277 Grimsrud, C.D., Romano, P.R., D'Souza, M., Puzas, J.E., Schwarz, E.M., Reynolds, P.R., Roiser, R.N., and  
1278 O'Keefe, R.J. (2001). BMP signaling stimulates chondrocyte maturation and the expression of  
1279 Indian hedgehog. *J Orthop Res* *19*, 18-25.
- 1280 Hiyama, A., Sakai, D., Risbud, M.V., Tanaka, M., Arai, F., Abe, K., and Mochida, J. (2010). Enhancement  
1281 of intervertebral disc cell senescence by WNT/beta-catenin signaling-induced matrix  
1282 metalloproteinase expression. *Arthritis Rheum* *62*, 3036-3047.
- 1283 Hou, G., Lu, H., Chen, M., Yao, H., and Zhao, H. (2014). Oxidative stress participates in age-related  
1284 changes in rat lumbar intervertebral discs. *Arch Gerontol Geriatr* *59*, 665-669.
- 1285 Humzah, M.D., and Soames, R.W. (1988). Human intervertebral disc: structure and function. *Anat Rec*  
1286 *220*, 337-356.
- 1287 Jayasuriya, C.T., Goldring, M.B., Terek, R., and Chen, Q. (2012). Matrilin-3 induction of IL-1 receptor  
1288 antagonist is required for up-regulating collagen II and aggrecan and down-regulating ADAMTS-  
1289 5 gene expression. *Arthritis Res Ther* *14*, R197.
- 1290 Ji, Q., Zheng, Y., Zhang, G., Hu, Y., Fan, X., Hou, Y., Wen, L., Li, L., Xu, Y., Wang, Y., *et al.* (2019).  
1291 Single-cell RNA-seq analysis reveals the progression of human osteoarthritis. *Ann Rheum Dis* *78*,  
1292 100-110.
- 1293 Jim, J.J., Nojonen-Hietala, N., Cheung, K.M., Ott, J., Karppinen, J., Sahraravand, A., Luk, K.D., Yip, S.P.,  
1294 Sham, P.C., Song, Y.Q., *et al.* (2005). The TRP2 allele of COL9A2 is an age-dependent risk factor  
1295 for the development and severity of intervertebral disc degeneration. *Spine (Phila Pa 1976)* *30*,  
1296 2735-2742.
- 1297 Johnson, J.L., Hall, T.E., Dyson, J.M., Sonntag, C., Ayers, K., Berger, S., Gautier, P., Mitchell, C., Hollway,  
1298 G.E., and Currie, P.D. (2012). Scube activity is necessary for Hedgehog signal transduction in vivo.  
1299 *Dev Biol* *368*, 193-202.



- 1300 Kalamajski, S., Bihan, D., Bonna, A., Rubin, K., and Farndale, R.W. (2016). Fibromodulin Interacts with  
1301 Collagen Cross-linking Sites and Activates Lysyl Oxidase. *J Biol Chem* 291, 7951-7960.
- 1302 Kanehisa, M., Sato, Y., Furumichi, M., Morishima, K., and Tanabe, M. (2019). New approach for  
1303 understanding genome variations in KEGG. *Nucleic Acids Res* 47, D590-D595.
- 1304 Kleifeld, O., Doucet, A., auf dem Keller, U., Prudova, A., Schilling, O., Kainthan, R.K., Starr, A.E., Foster,  
1305 L.J., Kizhakkedathu, J.N., and Overall, C.M. (2010). Isotopic labeling of terminal amines in  
1306 complex samples identifies protein N-termini and protease cleavage products. *Nat Biotechnol* 28,  
1307 281-288.
- 1308 Komori, T. (2010). Regulation of bone development and extracellular matrix protein genes by RUNX2.  
1309 *Cell Tissue Res* 339, 189-195.
- 1310 Lam, T.-k. (2013). Fate of notochord descendent cells in the intervertebral disc. In HKU Theses Online  
1311 (HKUTO) (The University of Hong Kong (Pokfulam, Hong Kong)).
- 1312 Lau, D., Elezagic, D., Hermes, G., Morgelin, M., Wohl, A.P., Koch, M., Hartmann, U., Hollriegel, S.,  
1313 Wagener, R., Paulsson, M., *et al.* (2018). The cartilage-specific lectin C-type lectin domain family  
1314 3 member A (CLEC3A) enhances tissue plasminogen activator-mediated plasminogen activation.  
1315 *J Biol Chem* 293, 203-214.
- 1316 Lee, C.G., Da Silva, C.A., Dela Cruz, C.S., Ahangari, F., Ma, B., Kang, M.J., He, C.H., Takyar, S., and  
1317 Elias, J.A. (2011). Role of chitin and chitinase/chitinase-like proteins in inflammation, tissue  
1318 remodeling, and injury. *Annu Rev Physiol* 73, 479-501.
- 1319 Leijten, J.C., Bos, S.D., Landman, E.B., Georgi, N., Jahr, H., Meulenbelt, I., Post, J.N., van Blitterswijk,  
1320 C.A., and Karperien, M. (2013). GREM1, FRZB and DKK1 mRNA levels correlate with  
1321 osteoarthritis and are regulated by osteoarthritis-associated factors. *Arthritis Res Ther* 15, R126.
- 1322 Li, C., Hancock, M.A., Sehgal, P., Zhou, S., Reinhardt, D.P., and Philip, A. (2016). Soluble CD109 binds  
1323 TGF-beta and antagonizes TGF-beta signalling and responses. *Biochem J* 473, 537-547.
- 1324 Lopez-Otin, C., and Overall, C.M. (2002). Protease degradomics: a new challenge for proteomics. *Nat Rev*  
1325 *Mol Cell Biol* 3, 509-519.
- 1326 Lu, Y., Qiao, L., Lei, G., Mira, R.R., Gu, J., and Zheng, Q. (2014). Col10a1 gene expression and  
1327 chondrocyte hypertrophy during skeletal development and disease. *Frontiers in Biology* 9, 195-  
1328 204.
- 1329 Markmann, A., Hausser, H., Schonherr, E., and Kresse, H. (2000). Influence of decorin expression on  
1330 transforming growth factor-beta-mediated collagen gel retraction and biglycan induction. *Matrix*  
1331 *Biol* 19, 631-636.
- 1332 Maseda, M., Yamaguchi, H., Kuroda, K., Mitsumata, M., Tokuhashi, Y., and Esumi, M. (2016). Proteomic  
1333 Analysis of Human Intervertebral Disc Degeneration. *Journal of Nihon University Medical*  
1334 *Association* 75, 16-21.
- 1335 Melas, I.N., Chairakaki, A.D., Chatzopoulou, E.I., Messinis, D.E., Katopodi, T., Pliaka, V., Samara, S.,  
1336 Mitsos, A., Dailiana, Z., Kollia, P., *et al.* (2014). Modeling of signaling pathways in chondrocytes  
1337 based on phosphoproteomic and cytokine release data. *Osteoarthritis Cartilage* 22, 509-518.
- 1338 Minogue, B.M., Richardson, S.M., Zeef, L.A., Freemont, A.J., and Hoyland, J.A. (2010). Characterization  
1339 of the human nucleus pulposus cell phenotype and evaluation of novel marker gene expression to  
1340 define adult stem cell differentiation. *Arthritis Rheum* 62, 3695-3705.
- 1341 Molinos, M., Almeida, C.R., Caldeira, J., Cunha, C., Goncalves, R.M., and Barbosa, M.A. (2015).  
1342 Inflammation in intervertebral disc degeneration and regeneration. *J R Soc Interface* 12, 20150429.
- 1343 Munir, S., Rade, M., Maatta, J.H., Freidin, M.B., and Williams, F.M.K. (2018). Intervertebral Disc Biology:  
1344 Genetic Basis of Disc Degeneration. *Curr Mol Biol Rep* 4, 143-150.
- 1345 Naba, A., Clauser, K.R., Hoersch, S., Liu, H., Carr, S.A., and Hynes, R.O. (2012). The matrisome: in silico  
1346 definition and in vivo characterization by proteomics of normal and tumor extracellular matrices.  
1347 *Mol Cell Proteomics* 11, M111 014647.
- 1348 Nakai, T., Sakai, D., Nakamura, Y., Nukaga, T., Grad, S., Li, Z., Alini, M., Chan, D., Masuda, K., Ando,  
1349 K., *et al.* (2016). CD146 defines commitment of cultured annulus fibrosus cells to express a  
1350 contractile phenotype. *J Orthop Res* 34, 1361-1372.

- 1351 Nakamichi, R., Kataoka, K., and Asahara, H. (2018). Essential role of Mohawk for tenogenic tissue  
1352 homeostasis including spinal disc and periodontal ligament. *Mod Rheumatol* 28, 933-940.
- 1353 Naveau, S., Poynard, T., Benattar, C., Bedossa, P., and Chaput, J.C. (1994). Alpha-2-macroglobulin and  
1354 hepatic fibrosis. Diagnostic interest. *Dig Dis Sci* 39, 2426-2432.
- 1355 Nerlich, A.G., Schaaf, R., Walchli, B., and Boos, N. (2007). Temporo-spatial distribution of blood vessels  
1356 in human lumbar intervertebral discs. *Eur Spine J* 16, 547-555.
- 1357 Newell, N., Little, J.P., Christou, A., Adams, M.A., Adam, C.J., and Masouros, S.D. (2017). Biomechanics  
1358 of the human intervertebral disc: A review of testing techniques and results. *J Mech Behav Biomed*  
1359 *Mater* 69, 420-434.
- 1360 Ong, S.E., Blagoev, B., Kratchmarova, I., Kristensen, D.B., Steen, H., Pandey, A., and Mann, M. (2002).  
1361 Stable isotope labeling by amino acids in cell culture, SILAC, as a simple and accurate approach  
1362 to expression proteomics. *Mol Cell Proteomics* 1, 376-386.
- 1363 Onnerfjord, P., Khabut, A., Reinholt, F.P., Svensson, O., and Heinegard, D. (2012a). Quantitative  
1364 proteomic analysis of eight cartilaginous tissues reveals characteristic differences as well as  
1365 similarities between subgroups. *J Biol Chem* 287, 18913-18924.
- 1366 Onnerfjord, P., Khabut, A., Reinholt, F.P., Svensson, O., and Heinegard, D. (2012b). Quantitative  
1367 proteomic analysis of eight cartilaginous tissues reveals characteristic differences as well as  
1368 similarities between subgroups. *Journal of Biological Chemistry* 287, 18913-18924.
- 1369 Park, J.S., Chu, J.S., Tsou, A.D., Diop, R., Tang, Z., Wang, A., and Li, S. (2011). The effect of matrix  
1370 stiffness on the differentiation of mesenchymal stem cells in response to TGF-beta. *Biomaterials*  
1371 32, 3921-3930.
- 1372 Peix, L., Evans, I.C., Pearce, D.R., Simpson, J.K., Maher, T.M., and McAnulty, R.J. (2018). Diverse  
1373 functions of clusterin promote and protect against the development of pulmonary fibrosis. *Sci Rep*  
1374 8, 1906.
- 1375 Pfirrmann, C.W., Metzdorf, A., Zanetti, M., Hodler, J., and Boos, N. (2001). Magnetic resonance  
1376 classification of lumbar intervertebral disc degeneration. *Spine (Phila Pa 1976)* 26, 1873-1878.
- 1377 Rajasekaran, S., Tangavel, C., K, S.S., Soundararajan, D.C.R., Nayagam, S.M., Matchado, M.S.,  
1378 Raveendran, M., Shetty, A.P., Kanna, R.M., and Dharmalingam, K. (2020). Inflammaging  
1379 determines health and disease in lumbar discs-evidence from differing proteomic signatures of  
1380 healthy, aging, and degenerating discs. *Spine J* 20, 48-59.
- 1381 Rajesh, D., and Dahia, C.L. (2018). Role of Sonic Hedgehog Signaling Pathway in Intervertebral Disc  
1382 Formation and Maintenance. *Curr Mol Biol Rep* 4, 173-179.
- 1383 Ranjani, V., Sreemol, G., Muthurajan, R., Natesan, S., Gnanam, R., Kanna, R.M., and Rajasekaran, S.  
1384 (2016). Proteomic Analysis of Degenerated Intervertebral Disc-identification of Biomarkers of  
1385 Degenerative Disc Disease and Development of Proteome Database. *Global Spine Journal* 6,  
1386 WO025.
- 1387 Rauniyar, N., and Yates, J.R., 3rd (2014). Isobaric labeling-based relative quantification in shotgun  
1388 proteomics. *J Proteome Res* 13, 5293-5309.
- 1389 Riester, S.M., Lin, Y., Wang, W., Cong, L., Mohamed Ali, A.M., Peck, S.H., Smith, L.J., Currier, B.L.,  
1390 Clark, M., Huddleston, P., *et al.* (2018). RNA sequencing identifies gene regulatory networks  
1391 controlling extracellular matrix synthesis in intervertebral disk tissues. *J Orthop Res* 36, 1356-1369.
- 1392 Risbud, M.V., Schoepflin, Z.R., Mwale, F., Kandel, R.A., Grad, S., Iatridis, J.C., Sakai, D., and Hoyland,  
1393 J.A. (2015). Defining the phenotype of young healthy nucleus pulposus cells: recommendations of  
1394 the Spine Research Interest Group at the 2014 annual ORS meeting. *J Orthop Res* 33, 283-293.
- 1395 Robinson, K.A., Sun, M., Barnum, C.E., Weiss, S.N., Huegel, J., Shetye, S.S., Lin, L., Saez, D., Adams,  
1396 S.M., Iozzo, R.V., *et al.* (2017). Decorin and biglycan are necessary for maintaining collagen fibril  
1397 structure, fiber realignment, and mechanical properties of mature tendons. *Matrix Biol* 64, 81-93.
- 1398 Rodrigues-Pinto, R., Berry, A., Piper-Hanley, K., Hanley, N., Richardson, S.M., and Hoyland, J.A. (2016).  
1399 Spatiotemporal analysis of putative notochordal cell markers reveals CD24 and keratins 8, 18, and  
1400 19 as notochord-specific markers during early human intervertebral disc development. *J Orthop*  
1401 *Res* 34, 1327-1340.

- 1402 Rodriguez, A.G., Slichter, C.K., Acosta, F.L., Rodriguez-Soto, A.E., Burghardt, A.J., Majumdar, S., and  
1403 Lotz, J.C. (2011). Human disc nucleus properties and vertebral endplate permeability. *Spine (Phila*  
1404 *Pa 1976)* 36, 512-520.
- 1405 Rubin, D.I. (2007). Epidemiology and risk factors for spine pain. *Neurol Clin* 25, 353-371.
- 1406 Rutges, J.P., Duit, R.A., Kummer, J.A., Oner, F.C., van Rijen, M.H., Verbout, A.J., Castelein, R.M., Dhert,  
1407 W.J., and Creemers, L.B. (2010). Hypertrophic differentiation and calcification during  
1408 intervertebral disc degeneration. *Osteoarthritis Cartilage* 18, 1487-1495.
- 1409 Saito, T., Ikeda, T., Nakamura, K., Chung, U.I., and Kawaguchi, H. (2007). S100A1 and S100B,  
1410 transcriptional targets of SOX trio, inhibit terminal differentiation of chondrocytes. *EMBO Rep* 8,  
1411 504-509.
- 1412 Sakai, D., Nakamura, Y., Nakai, T., Mishima, T., Kato, S., Grad, S., Alini, M., Risbud, M.V., Chan, D.,  
1413 Cheah, K.S., *et al.* (2012). Exhaustion of nucleus pulposus progenitor cells with ageing and  
1414 degeneration of the intervertebral disc. *Nat Commun* 3, 1264.
- 1415 Saleem, S., Aslam, H.M., Rehmani, M.A., Raees, A., Alvi, A.A., and Ashraf, J. (2013). Lumbar disc  
1416 degenerative disease: disc degeneration symptoms and magnetic resonance image findings. *Asian*  
1417 *Spine J* 7, 322-334.
- 1418 Sarath Babu, N., Krishnan, S., Brahmendra Swamy, C.V., Venkata Subbaiah, G.P., Gurava Reddy, A.V.,  
1419 and Idris, M.M. (2016). Quantitative proteomic analysis of normal and degenerated human  
1420 intervertebral disc. *Spine J* 16, 989-1000.
- 1421 Schneiderman, G., Flannigan, B., Kingston, S., Thomas, J., Dillin, W.H., and Watkins, R.G. (1987).  
1422 Magnetic resonance imaging in the diagnosis of disc degeneration: correlation with discography.  
1423 *Spine (Phila Pa 1976)* 12, 276-281.
- 1424 Silagi, E.S., Shapiro, I.M., and Risbud, M.V. (2018). Glycosaminoglycan synthesis in the nucleus pulposus:  
1425 Dysregulation and the pathogenesis of disc degeneration. *Matrix Biol* 71-72, 368-379.
- 1426 Song, Y.Q., Cheung, K.M., Ho, D.W., Poon, S.C., Chiba, K., Kawaguchi, Y., Hirose, Y., Alini, M., Grad,  
1427 S., Yee, A.F., *et al.* (2008). Association of the asporin D14 allele with lumbar-disc degeneration in  
1428 Asians. *Am J Hum Genet* 82, 744-747.
- 1429 Song, Y.Q., Karasugi, T., Cheung, K.M., Chiba, K., Ho, D.W., Miyake, A., Kao, P.Y., Sze, K.L., Yee, A.,  
1430 Takahashi, A., *et al.* (2013). Lumbar disc degeneration is linked to a carbohydrate sulfotransferase  
1431 3 variant. *J Clin Invest* 123, 4909-4917.
- 1432 Subramanian, A., and Schilling, T.F. (2014). Thrombospondin-4 controls matrix assembly during  
1433 development and repair of myotendinous junctions. *Elife* 3.
- 1434 Subramanian, A., Tamayo, P., Mootha, V.K., Mukherjee, S., Ebert, B.L., Gillette, M.A., Paulovich, A.,  
1435 Pomeroy, S.L., Golub, T.R., Lander, E.S., *et al.* (2005). Gene set enrichment analysis: a knowledge-  
1436 based approach for interpreting genome-wide expression profiles. *Proc Natl Acad Sci U S A* 102,  
1437 15545-15550.
- 1438 Sun, Z., Liu, B., and Luo, Z.J. (2020). The Immune Privilege of the Intervertebral Disc: Implications for  
1439 Intervertebral Disc Degeneration Treatment. *Int J Med Sci* 17, 685-692.
- 1440 Taha, I.N., and Naba, A. (2019). Exploring the extracellular matrix in health and disease using proteomics.  
1441 *Essays Biochem* 63, 417-432.
- 1442 Takao, T., and Iwaki, T. (2002). A comparative study of localization of heat shock protein 27 and heat  
1443 shock protein 72 in the developmental and degenerative intervertebral discs. *Spine (Phila Pa 1976)*  
1444 27, 361-368.
- 1445 Taye, N., Karoulias, S.Z., and Hubmacher, D. (2020). The "other" 15-40%: The Role of Non-Collagenous  
1446 Extracellular Matrix Proteins and Minor Collagens in Tendon. *J Orthop Res* 38, 23-35.
- 1447 Team, R.C. (2013). R: A language and environment for statistical computing.
- 1448 Teraguchi, M., Yoshimura, N., Hashizume, H., Muraki, S., Yamada, H., Minamide, A., Oka, H., Ishimoto,  
1449 Y., Nagata, K., Kagotani, R., *et al.* (2014). Prevalence and distribution of intervertebral disc  
1450 degeneration over the entire spine in a population-based cohort: the Wakayama Spine Study.  
1451 *Osteoarthritis Cartilage* 22, 104-110.
- 1452 Tibshirani, R. (1996). Regression shrinkage and selection via the Lasso. *J Roy Stat Soc B Met* 58, 267-288.

- 1453 Trougakos, I.P. (2013). The molecular chaperone apolipoprotein J/clusterin as a sensor of oxidative stress:  
1454 implications in therapeutic approaches - a mini-review. *Gerontology* 59, 514-523.
- 1455 Urban, J.P., Smith, S., and Fairbank, J.C. (2004). Nutrition of the intervertebral disc. *Spine (Phila Pa 1976)*  
1456 29, 2700-2709.
- 1457 van Buuren, S., and Groothuis-Oudshoorn, K. (2011). mice: Multivariate Imputation by Chained Equations  
1458 in R. *J Stat Softw* 45, 1-67.
- 1459 van den Akker, G.G.H., Koenders, M.I., van de Loo, F.A.J., van Lent, P., Blaney Davidson, E., and van der  
1460 Kraan, P.M. (2017). Transcriptional profiling distinguishes inner and outer annulus fibrosus from  
1461 nucleus pulposus in the bovine intervertebral disc. *Eur Spine J* 26, 2053-2062.
- 1462 van der Kraan, P.M., and van den Berg, W.B. (2012). Chondrocyte hypertrophy and osteoarthritis: role in  
1463 initiation and progression of cartilage degeneration? *Osteoarthritis Cartilage* 20, 223-232.
- 1464 Vaquerizas, J.M., Kummerfeld, S.K., Teichmann, S.A., and Luscombe, N.M. (2009). A census of human  
1465 transcription factors: function, expression and evolution. *Nat Rev Genet* 10, 252-263.
- 1466 Veras, M.A., McCann, M.R., Tenn, N.A., and Seguin, C.A. (2020). Transcriptional profiling of the murine  
1467 intervertebral disc and age-associated changes in the nucleus pulposus. *Connect Tissue Res* 61, 63-  
1468 81.
- 1469 Vizcaino, J.A., Csordas, A., del-Toro, N., Dianes, J.A., Griss, J., Lavidas, I., Mayer, G., Perez-Riverol, Y.,  
1470 Reisinger, F., Ternent, T., *et al.* (2016). 2016 update of the PRIDE database and its related tools.  
1471 *Nucleic Acids Res* 44, D447-456.
- 1472 Wang, X.L., Hou, L., Zhao, C.G., Tang, Y., Zhang, B., Zhao, J.Y., and Wu, Y.B. (2019a). Screening of  
1473 genes involved in epithelial-mesenchymal transition and differential expression of complement-  
1474 related genes induced by PAX2 in renal tubules. *Nephrology (Carlton)* 24, 263-271.
- 1475 Wang, Y., Fan, X., Xing, L., and Tian, F. (2019b). Wnt signaling: a promising target for osteoarthritis  
1476 therapy. *Cell Commun Signal* 17, 97.
- 1477 Wisniewski, J.R., Hein, M.Y., Cox, J., and Mann, M. (2014). A "proteomic ruler" for protein copy number  
1478 and concentration estimation without spike-in standards. *Mol Cell Proteomics* 13, 3497-3506.
- 1479 Wuertz, K., Vo, N., Kletsas, D., and Boos, N. (2012). Inflammatory and catabolic signalling in  
1480 intervertebral discs: the roles of NF-kappaB and MAP kinases. *Eur Cell Mater* 23, 103-119;  
1481 discussion 119-120.
- 1482 Wyatt, A.R., Yerbury, J.J., and Wilson, M.R. (2009). Structural characterization of clusterin-chaperone  
1483 client protein complexes. *J Biol Chem* 284, 21920-21927.
- 1484 Yates, B., Braschi, B., Gray, K.A., Seal, R.L., Tweedie, S., and Bruford, E.A. (2017). Genenames.org: the  
1485 HGNC and VGNC resources in 2017. *Nucleic Acids Res* 45, D619-D625.
- 1486 Yee, A., Lam, M.P., Tam, V., Chan, W.C., Chu, I.K., Cheah, K.S., Cheung, K.M., and Chan, D. (2016).  
1487 Fibrotic-like changes in degenerate human intervertebral discs revealed by quantitative proteomic  
1488 analysis. *Osteoarthritis Cartilage* 24, 503-513.
- 1489 Zhu, M., Tang, D., Wu, Q., Hao, S., Chen, M., Xie, C., Rosier, R.N., O'Keefe, R.J., Zuscik, M., and Chen,  
1490 D. (2009). Activation of beta-catenin signaling in articular chondrocytes leads to osteoarthritis-like  
1491 phenotype in adult beta-catenin conditional activation mice. *J Bone Miner Res* 24, 12-21.
- 1492 Zhu, S., Qiu, H., Bennett, S., Kuek, V., Rosen, V., Xu, H., and Xu, J. (2019). Chondromodulin-1 in health,  
1493 osteoarthritis, cancer, and heart disease. *Cell Mol Life Sci* 76, 4493-4502.
- 1494



**FIGURE 1**

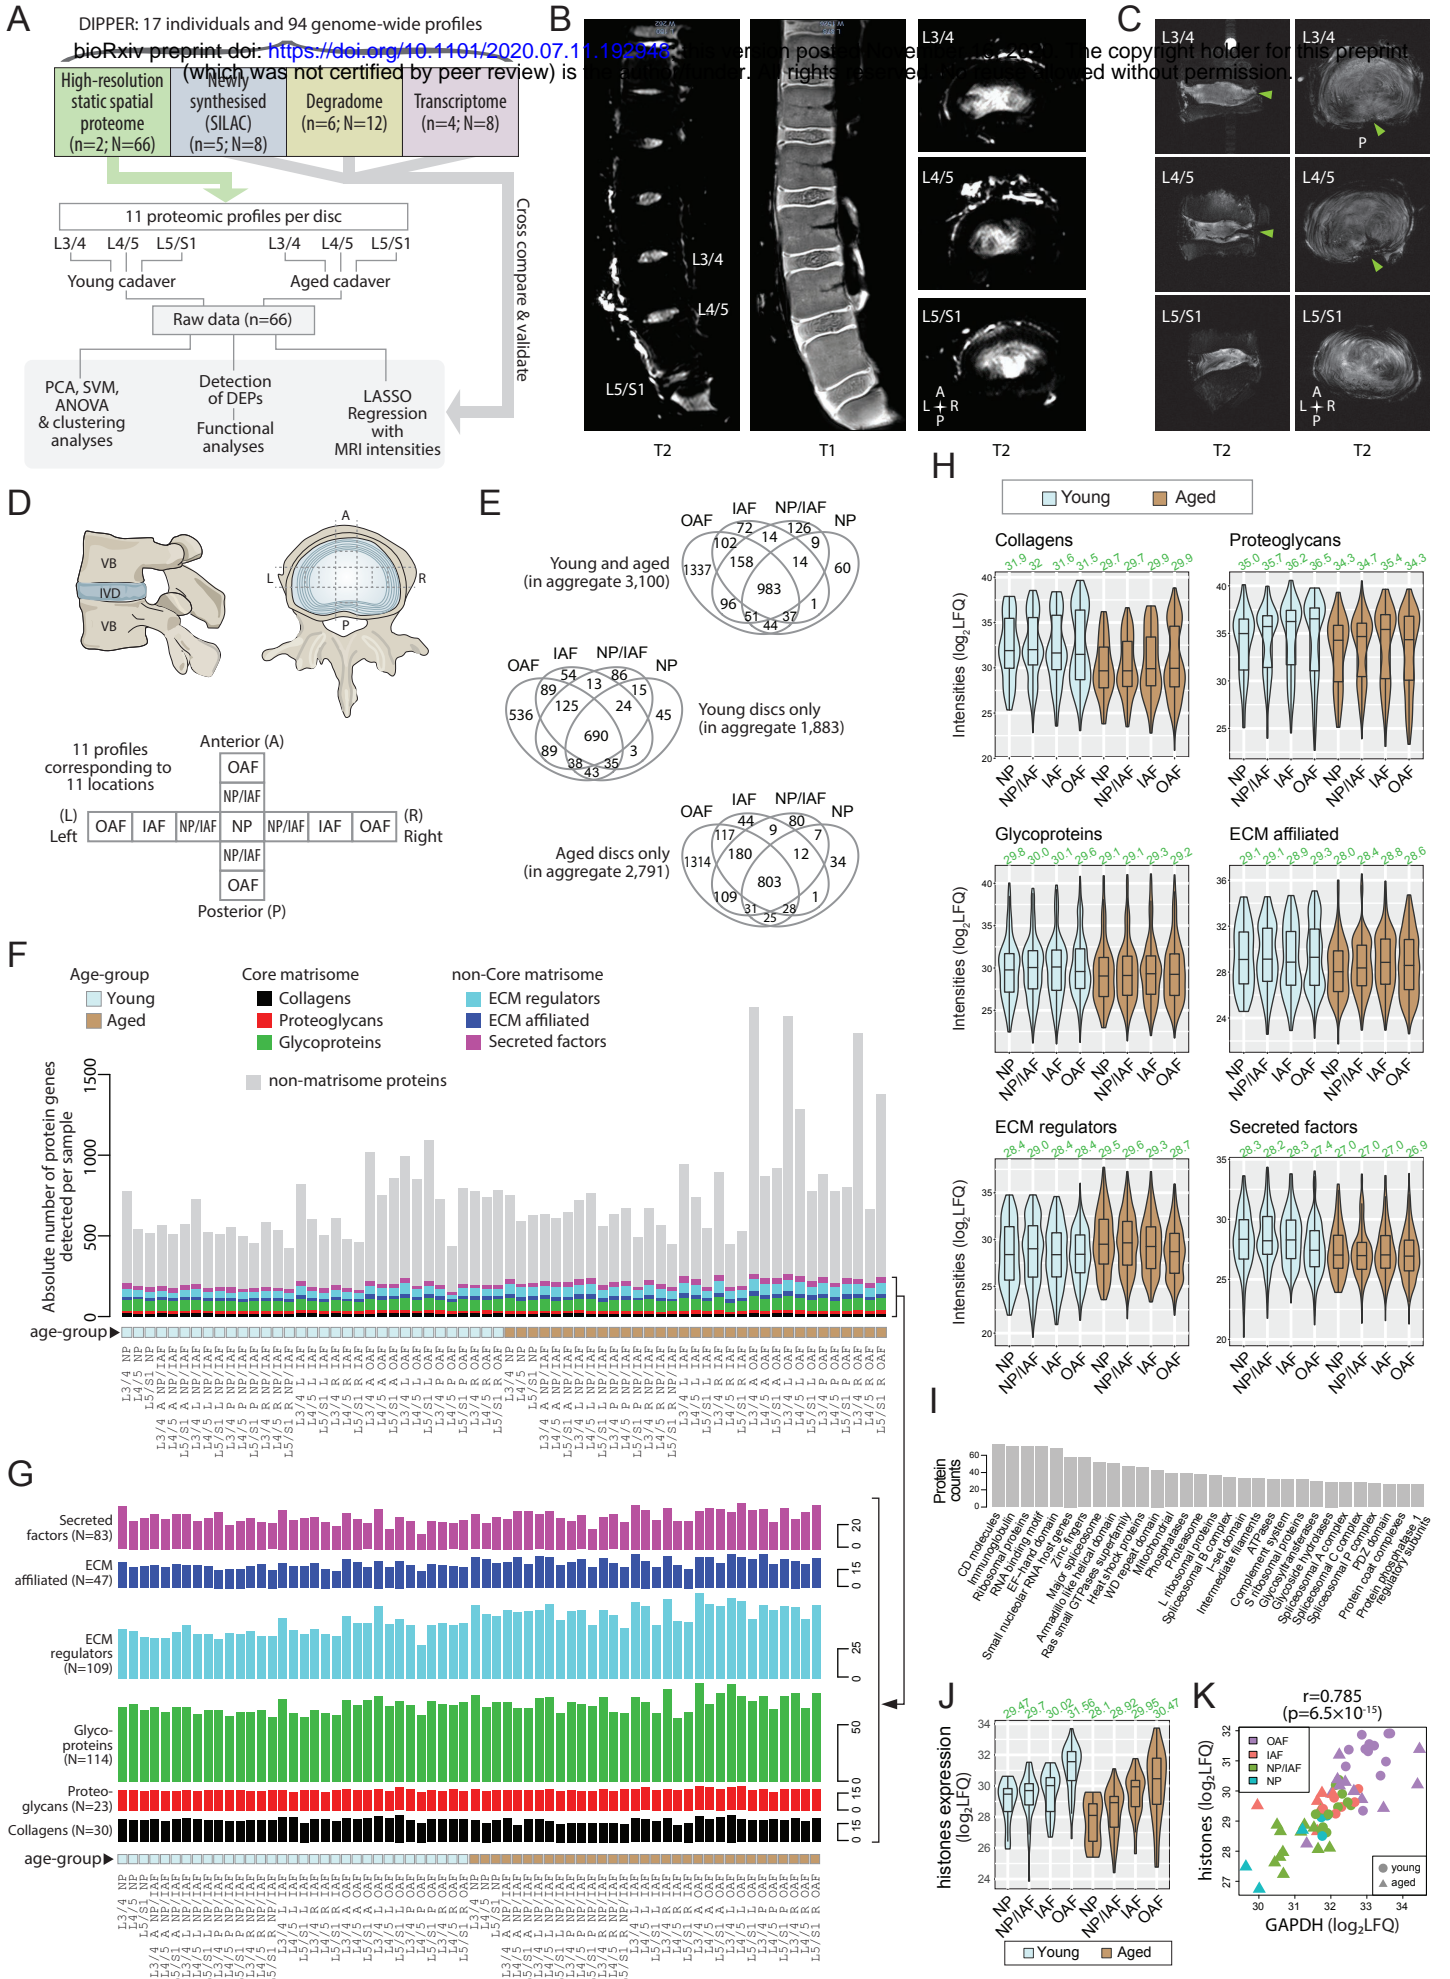

FIGURE 2

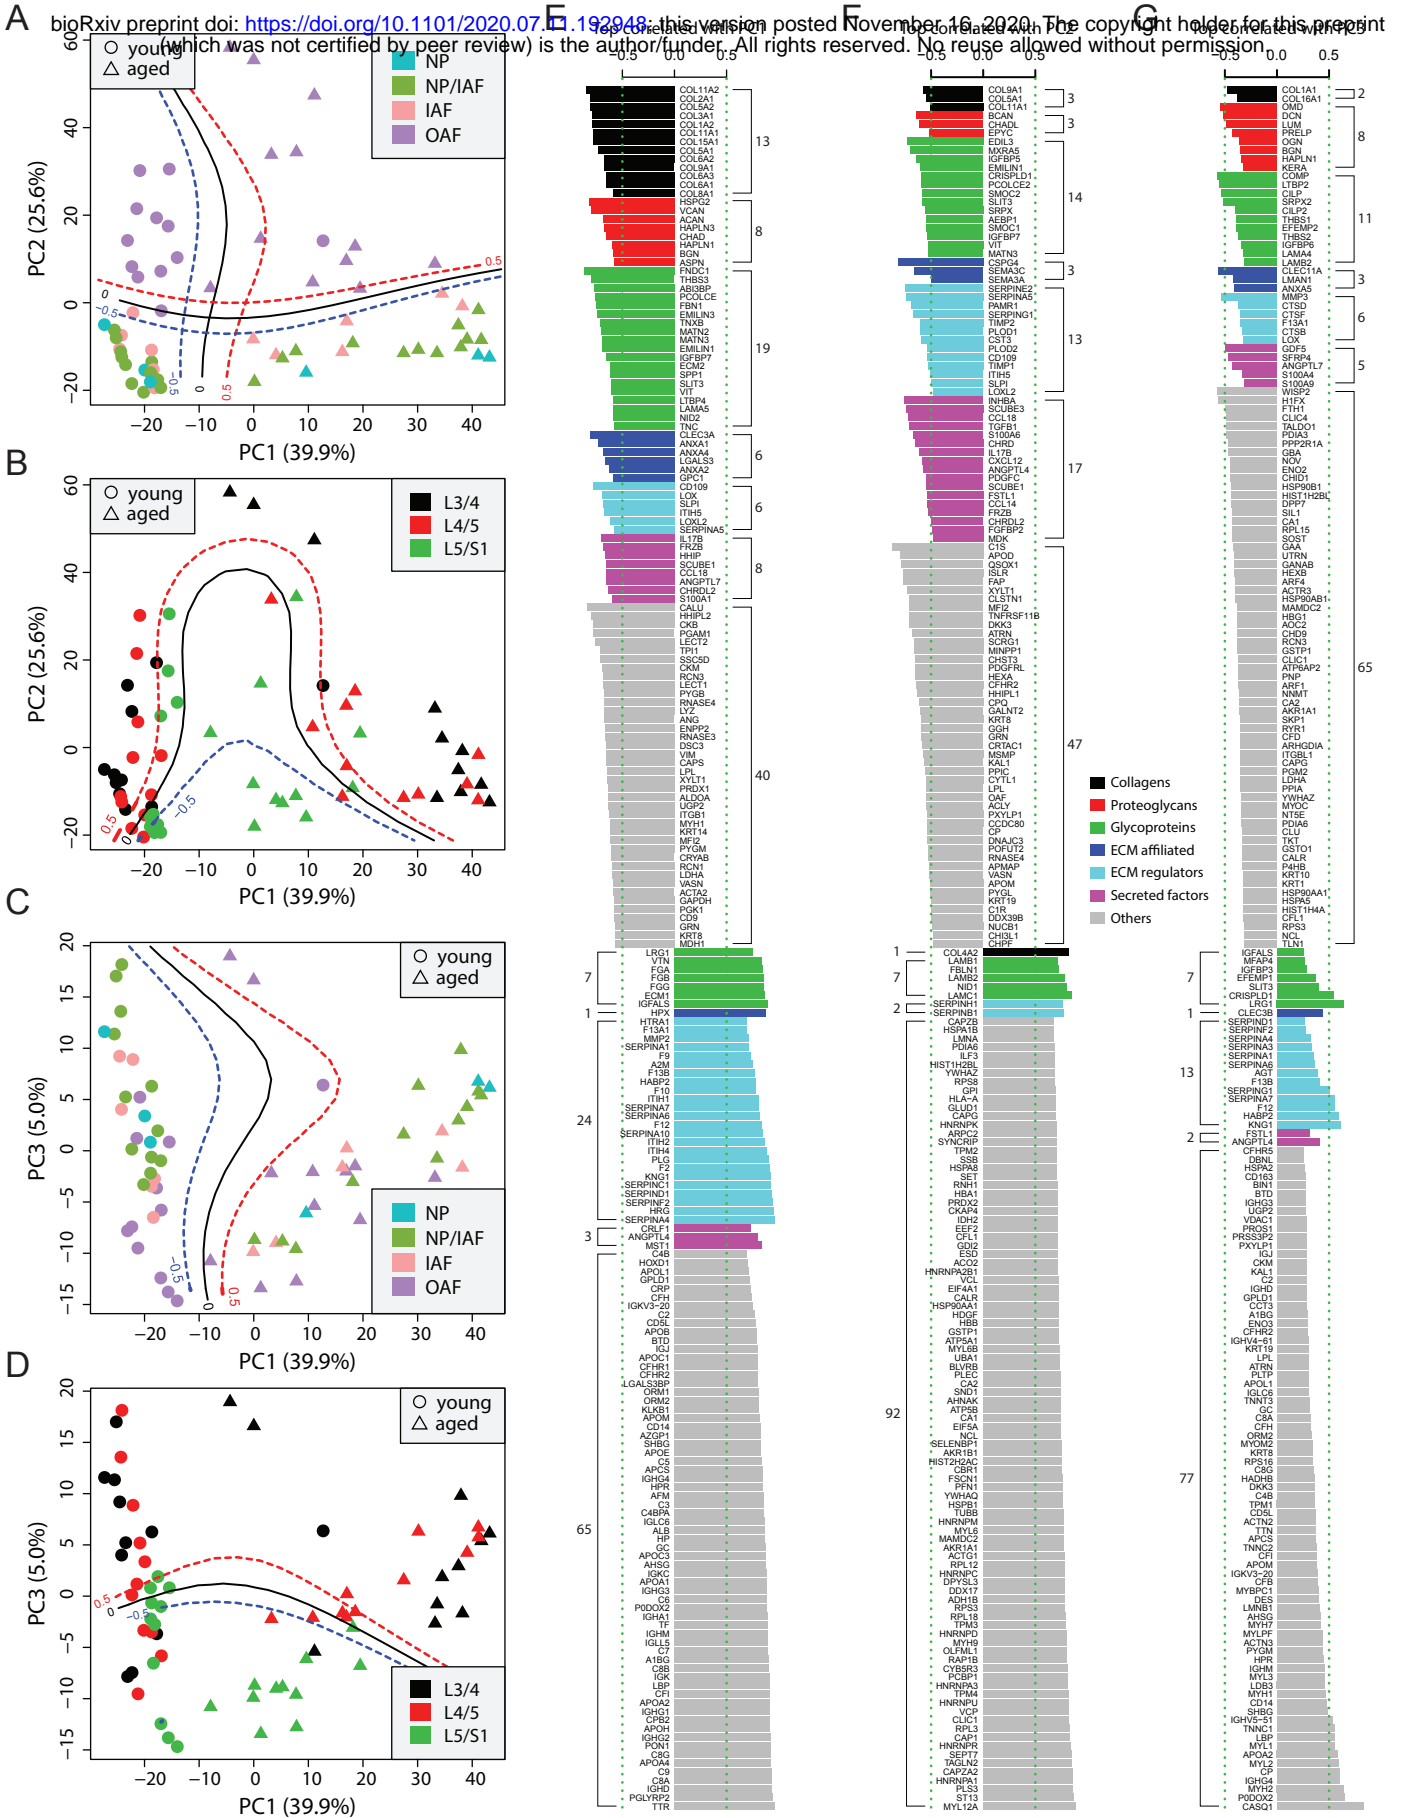

**FIGURE 3**

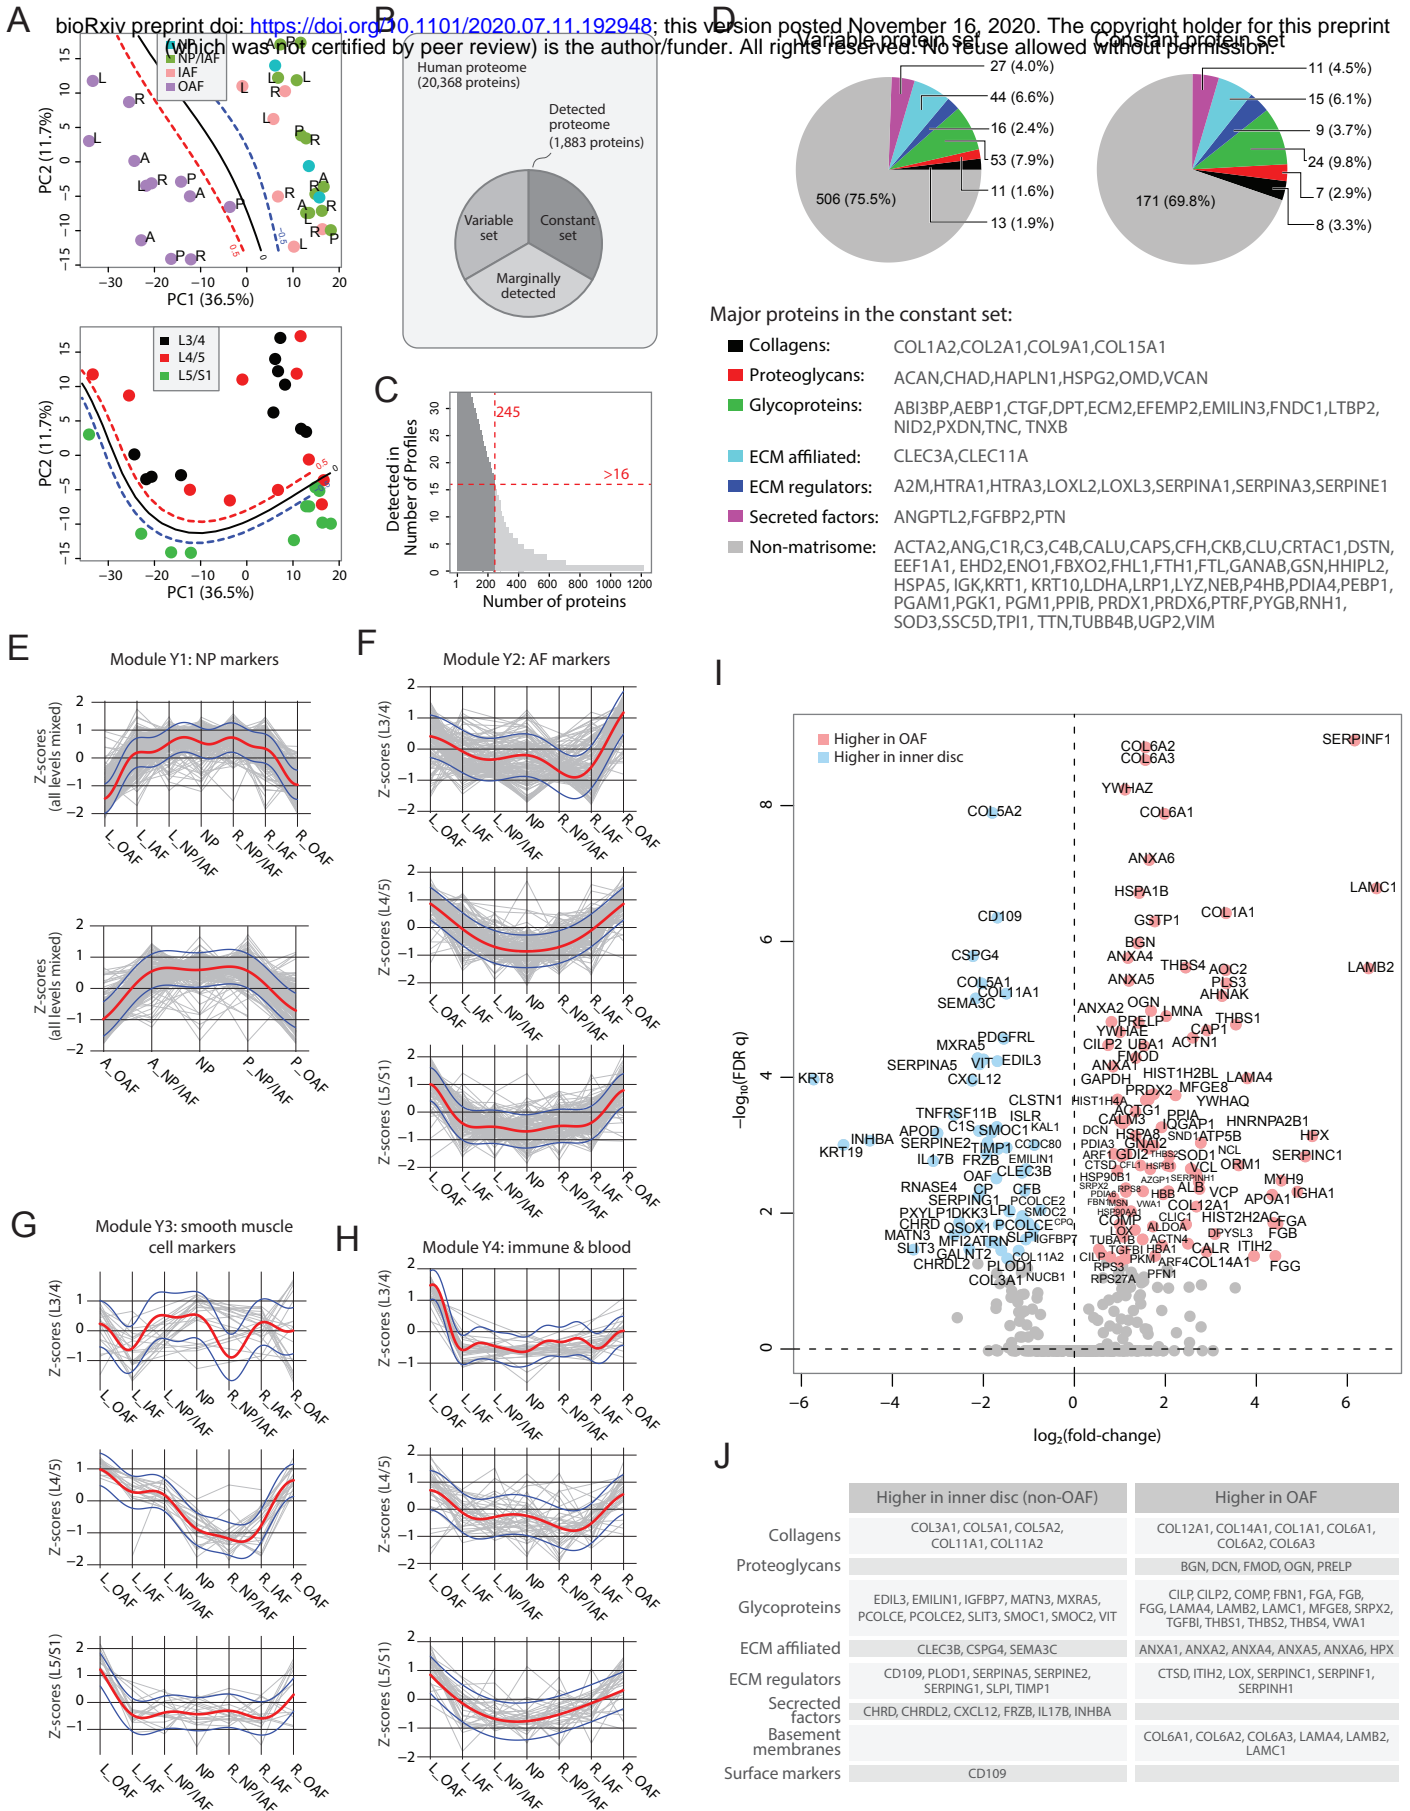



**FIGURE 4**

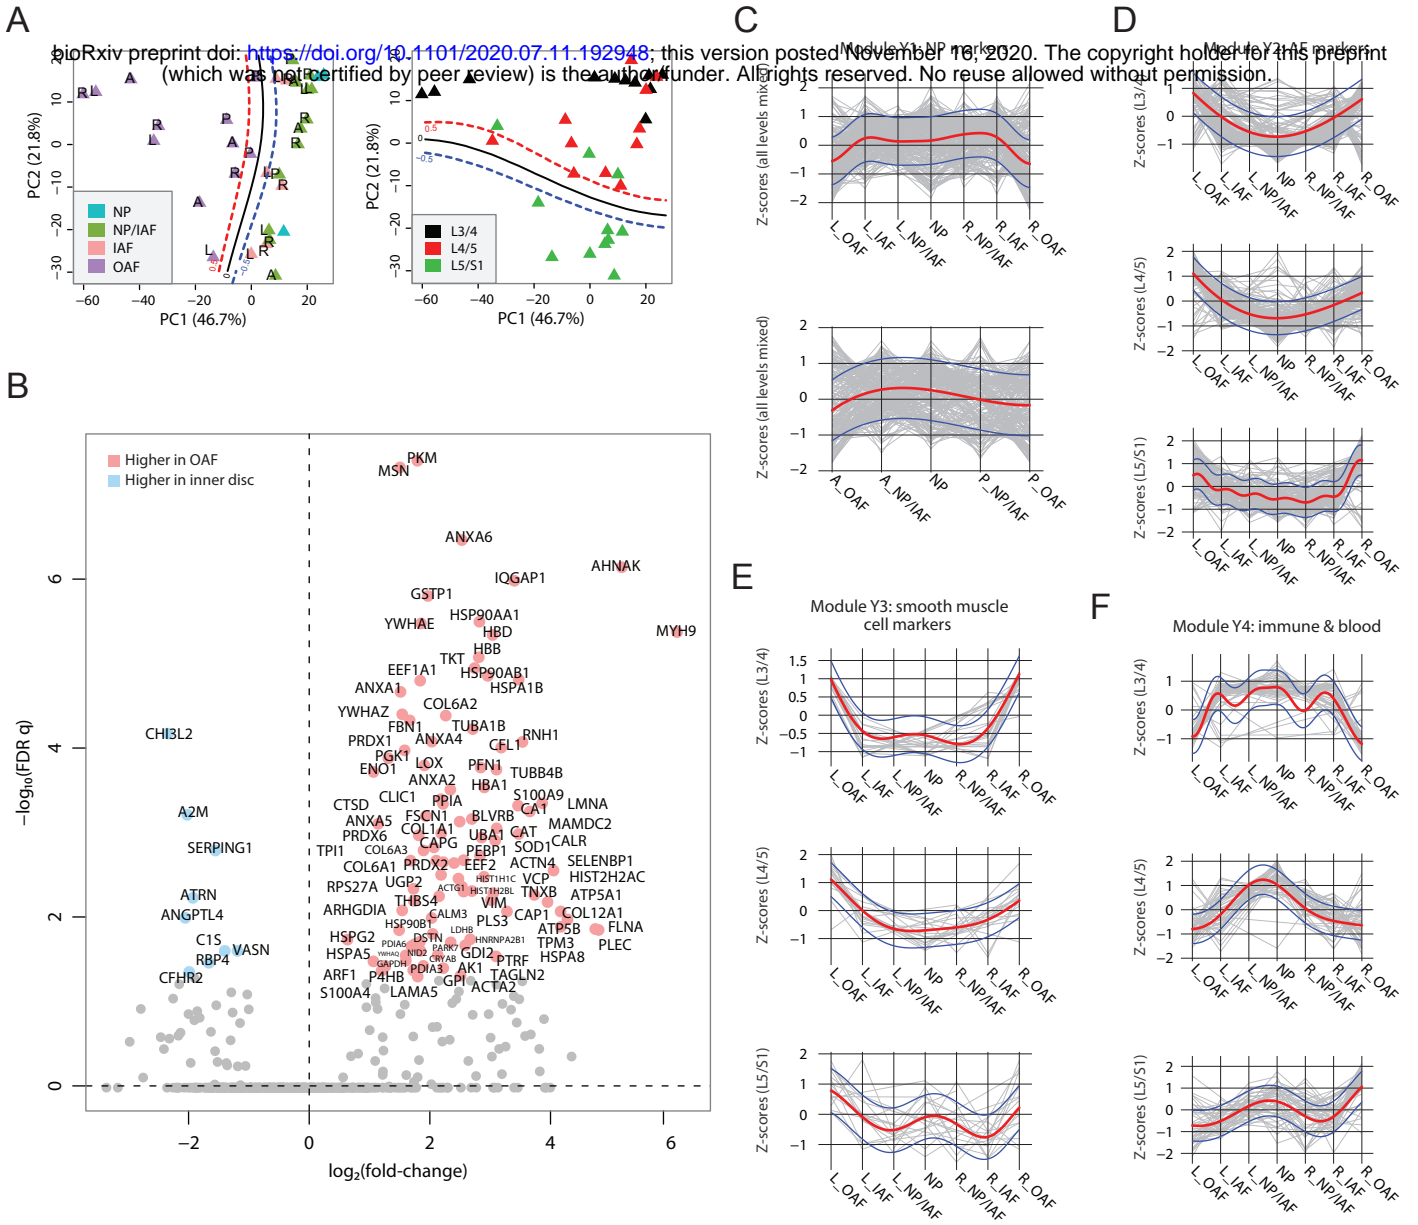

**FIGURE 5**

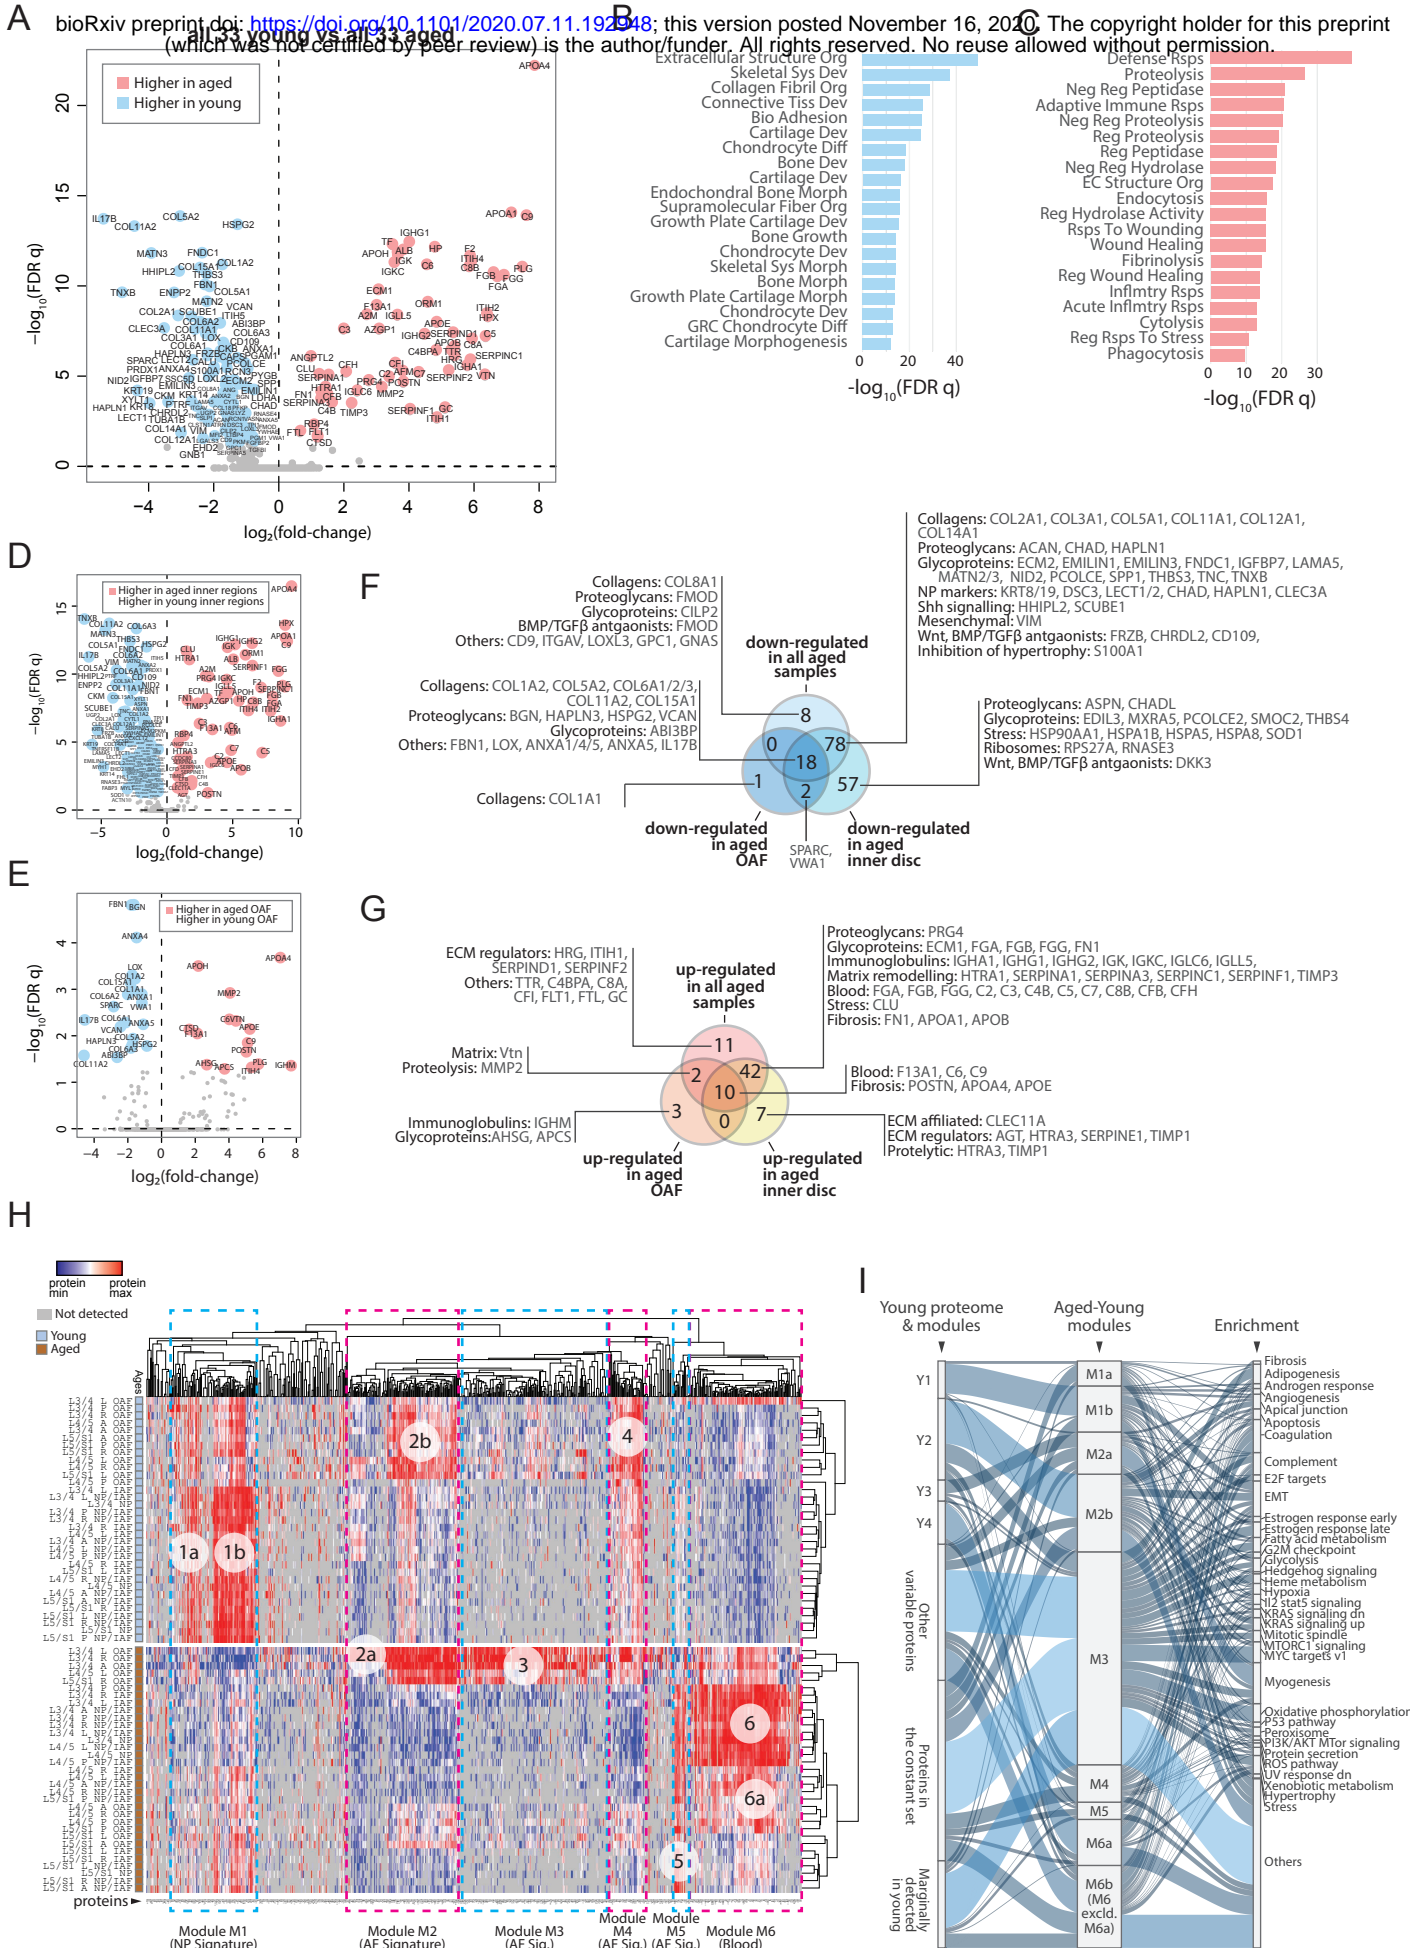

**FIGURE 6**

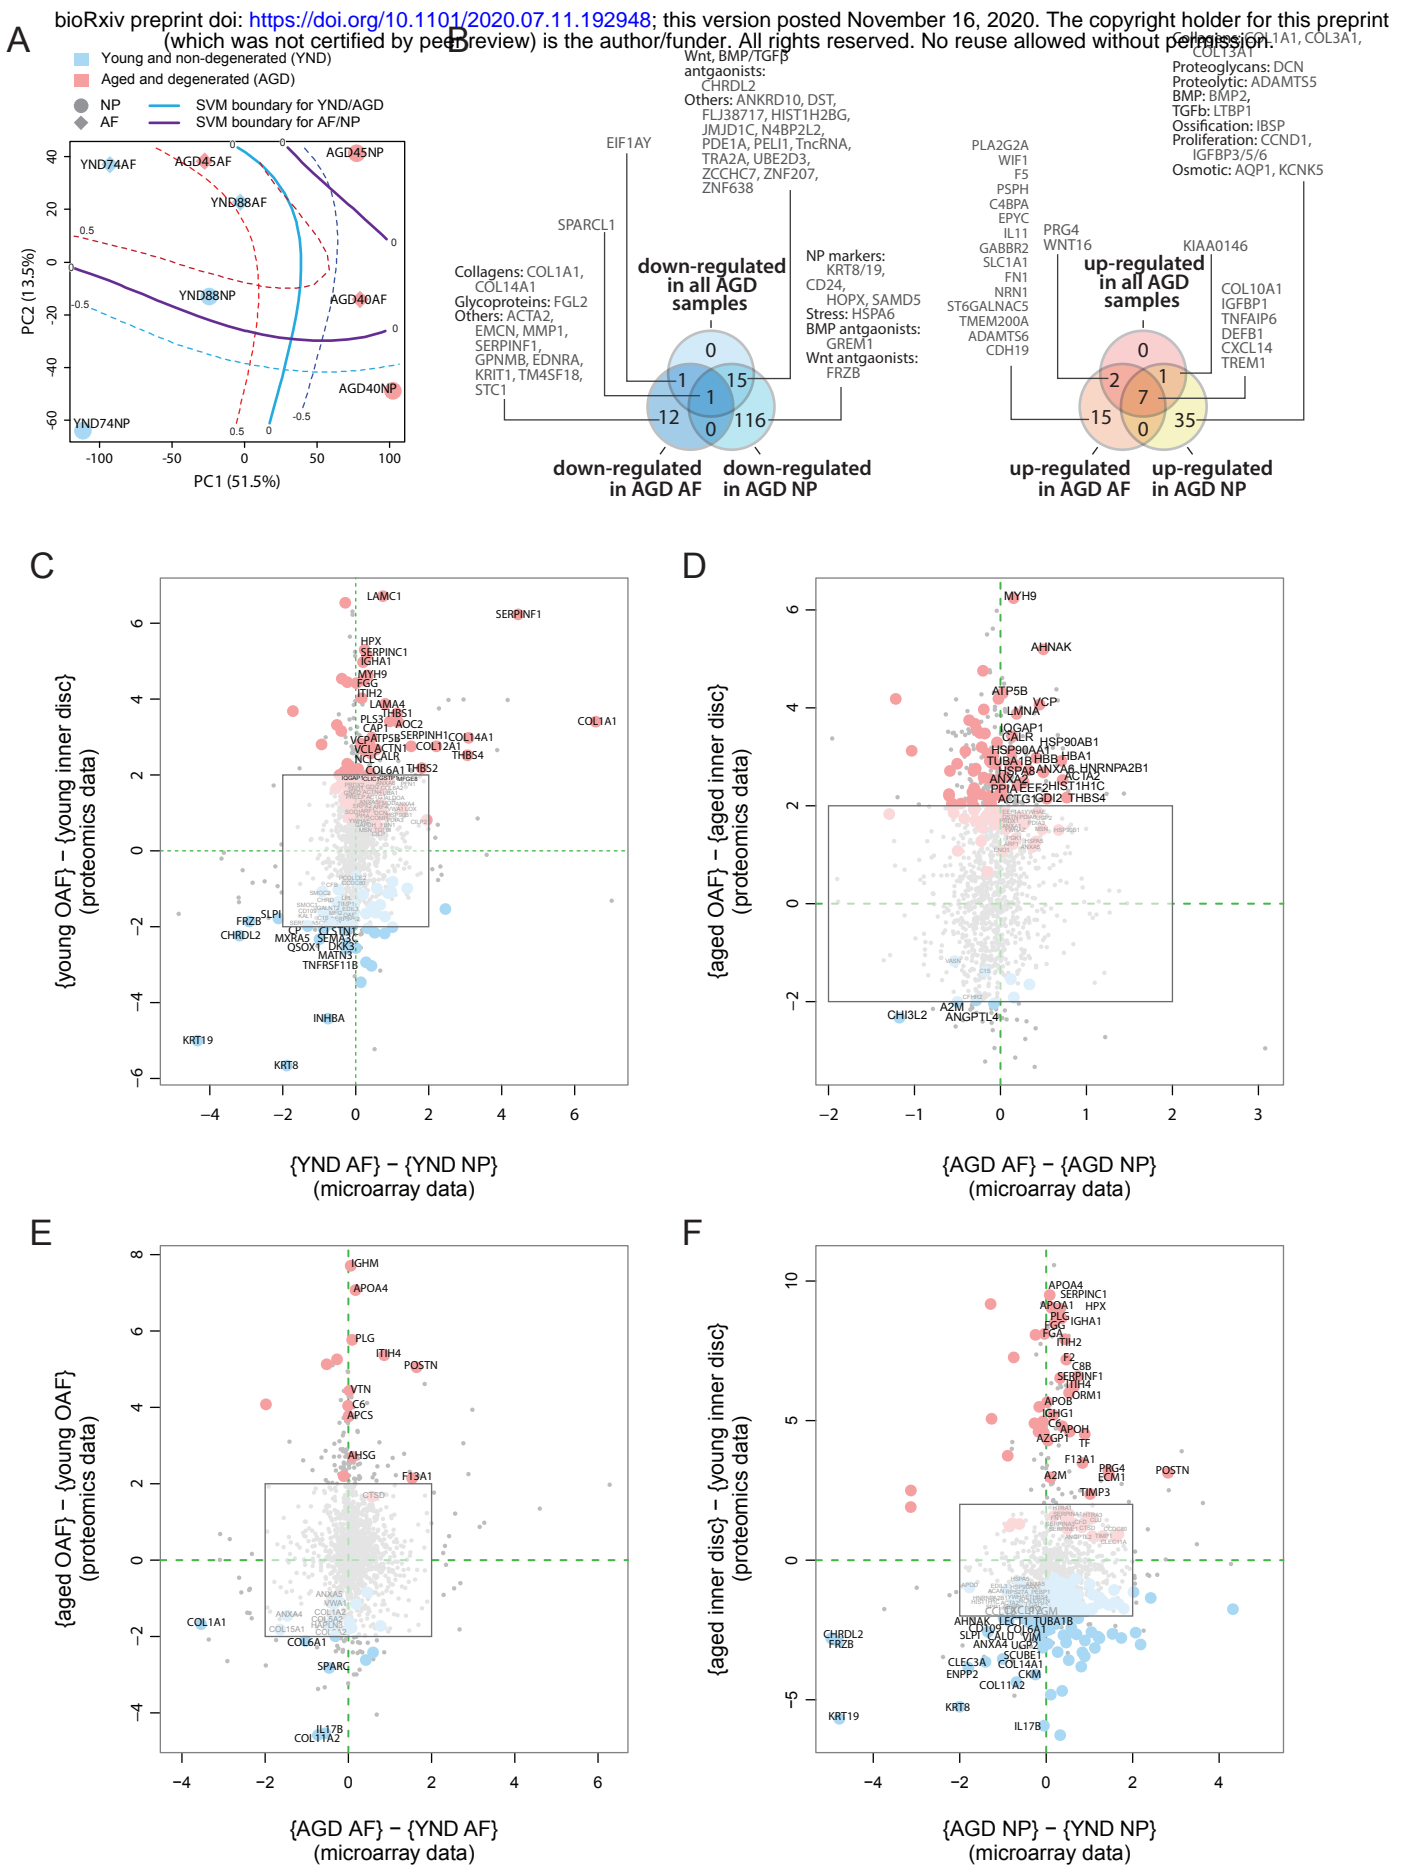

**FIGURE 7**

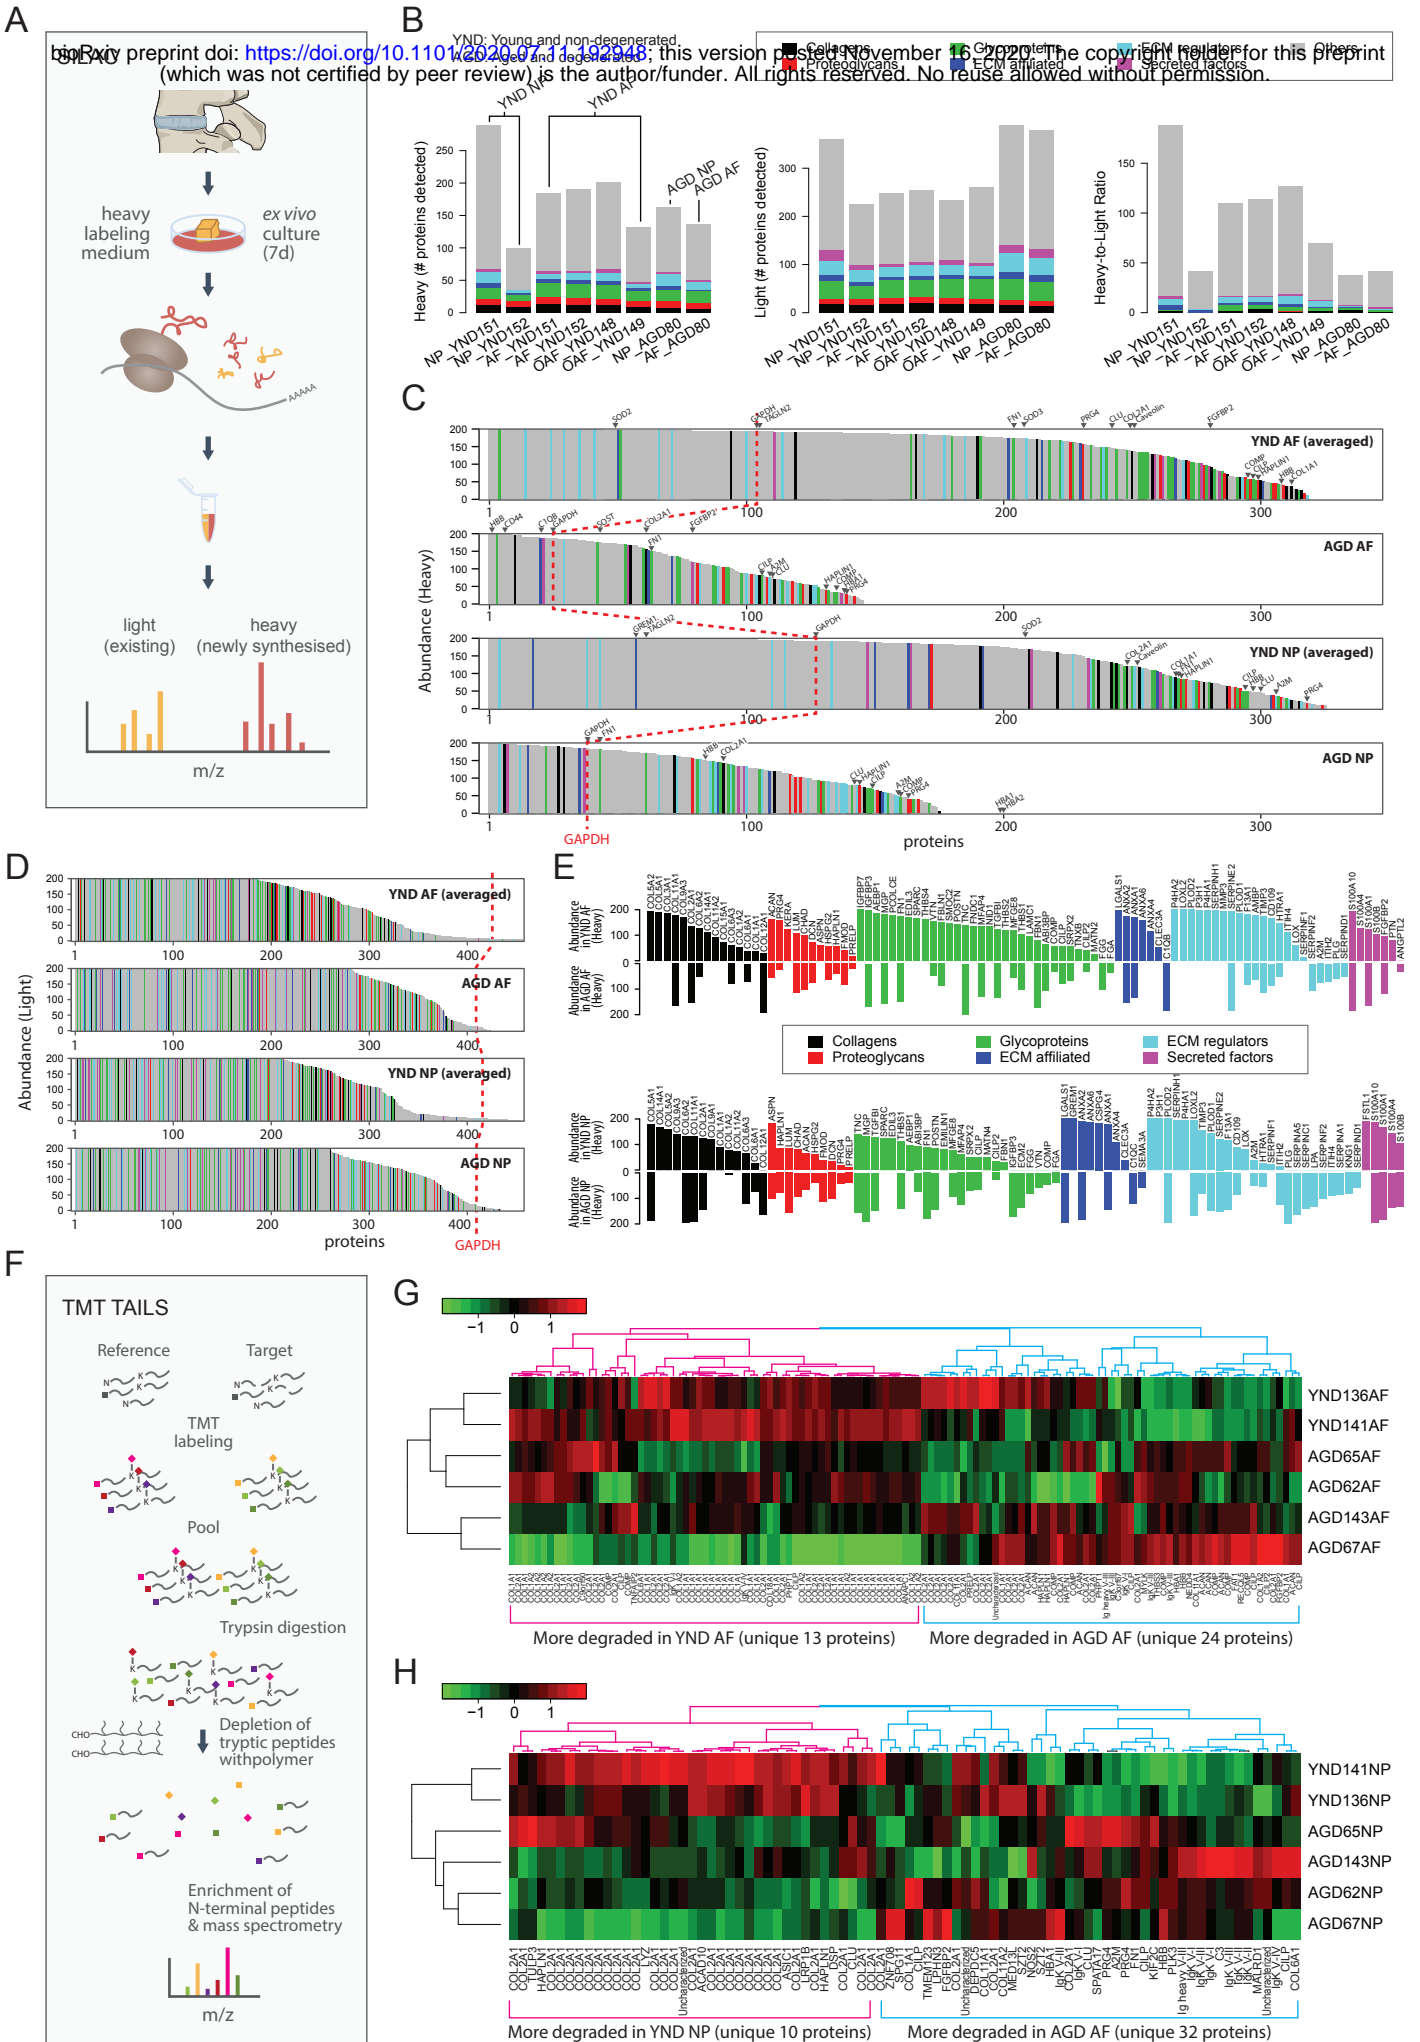



**FIGURE 8**

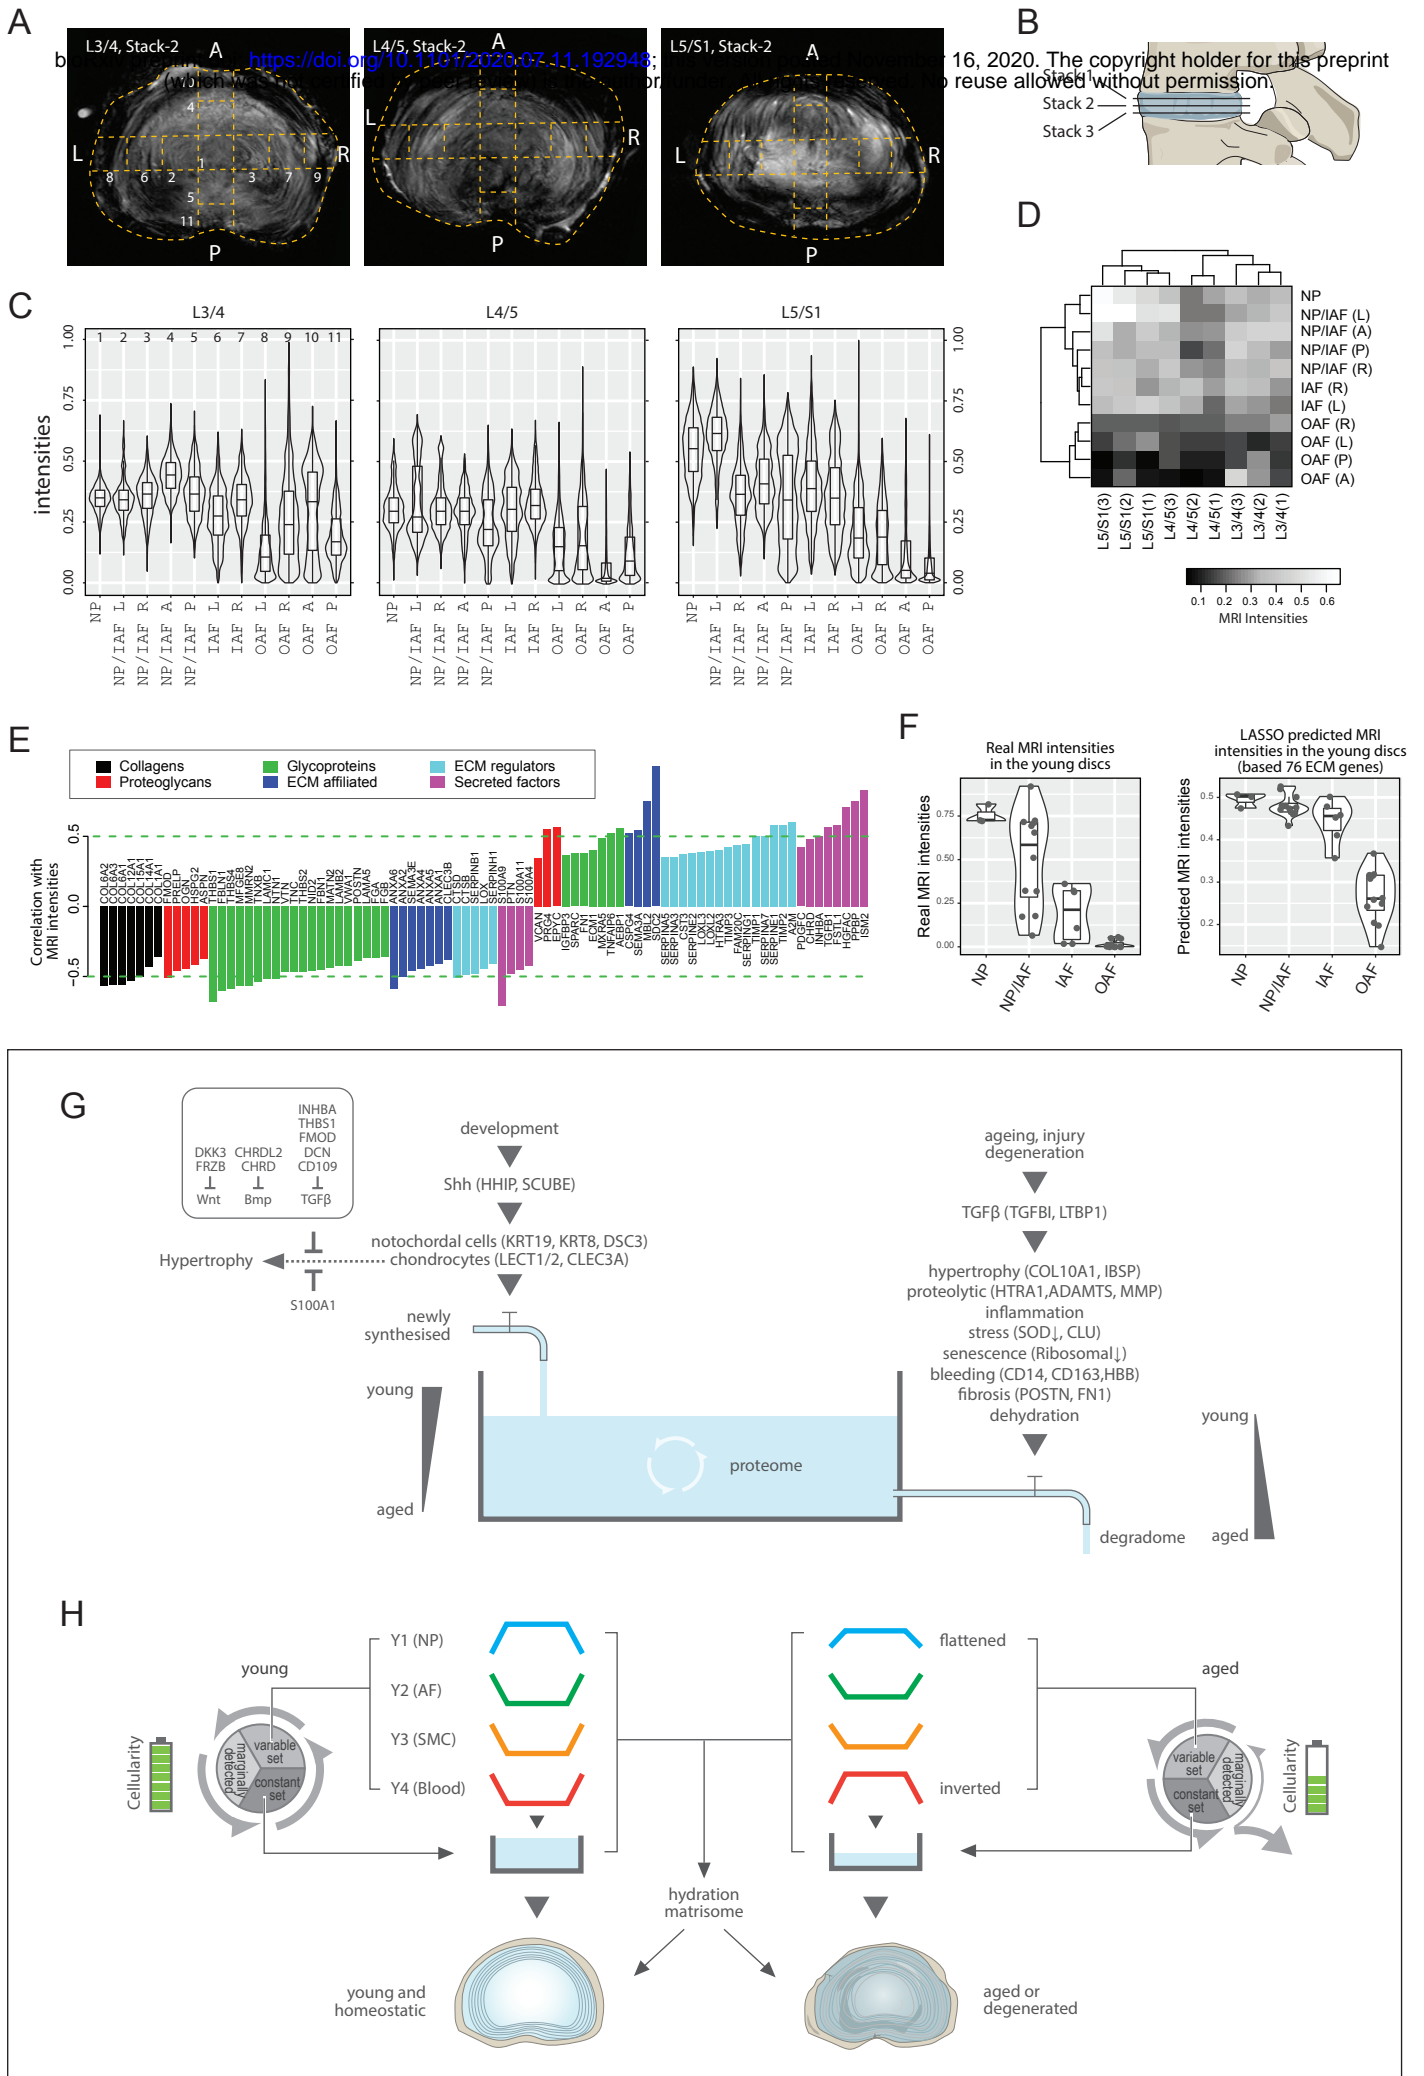

Source: https://www.biorxiv.org/content/biorxiv/early/2020/11/16/2020.07.11.192948.full.pdf
