# Supplementary material for: DIPPER: a spatiotemporal proteomics atlas of human intervertebral discs for exploring ageing and degeneration dynamics
Source: bioRxiv preprint, doi:10.1101/2020.07.11.192948, version 3 (2020-11-20)
Supplement: Supplemental Table 1 [file 192948_file03.xlsx]

## Sheet: Raw data
			Label free quantification (LFQ) intensities of the 66 static proteome profiles
T: Majority protein IDs	T: Protein names	T: Gene names	LFQ intensity L3/4 old L OAF	LFQ intensity L3/4 old A OAF	LFQ intensity L3/4 old P OAF	LFQ intensity L3/4 old R OAF	LFQ intensity L3/4 old L IAF	LFQ intensity L3/4 old R IAF	LFQ intensity L3/4 old L IAF/NP	LFQ intensity L3/4 old A IAF/NP	LFQ intensity L3/4 old P IAF/NP	LFQ intensity L3/4 old R IAF/NP	LFQ intensity L3/4 old NP	LFQ intensity L3/4 Young L OAF	LFQ intensity L3/4 young A OAF	LFQ intensity L3/4 young P OAF	LFQ intensity L3/4 young R OAF	LFQ intensity L3/4 young L IAF	LFQ intensity L3/4 young R IAF	LFQ intensity L3/4 young L IAF/NP	LFQ intensity L3/4 young A IAF/NP	LFQ intensity L3/4 young P IAF/NP	LFQ intensity L3/4 young R IAF/NP	LFQ intensity L3/4 young NP	LFQ intensity L4/5 old L OAF	LFQ intensity L4/5 old A OAF	LFQ intensity L4/5 old P OAF	LFQ intensity L4/5 old R OAF	LFQ intensity L4/5 old L IAF	LFQ intensity L4/5 old R IAF	LFQ intensity L4/5 old L IAF/NP	LFQ intensity L4/5 old A IAF/NP	LFQ intensity L4/5 old P IAF/NP	LFQ intensity L4/5 old R IAF/NP	LFQ intensity L4/5 old NP	LFQ intensity L4/5 young L OAF	LFQ intensity L4/5 young A OAF	LFQ intensity L4/5 young P OAF	LFQ intensity L4/5 young R OAF	LFQ intensity L4/5 young L IAF	LFQ intensity L4/5 young R IAF	LFQ intensity L4/5 young L IAF/NP	LFQ intensity L4/5 young A IAF/NP	LFQ intensity L4/5 young P IAF/NP	LFQ intensity L4/5 young R IAF/NP	LFQ intensity L4/5 young NP	LFQ intensity L5/S1 old L OAF	LFQ intensity L5/S1 old A OAF	LFQ intensity L5/S1 old P OAF
Q15019	Septin-2	SEPT2	28.6085	29.2909	27.5333	29.4708	NaN	25.93	27.3726	27.1757	NaN	26.7803	27.1491	26.3656	27.3307	26.9916	26.9555	27.1661	NaN	NaN	NaN	26.406	NaN	27.9961	28.8116	27.158	27.7351	28.0066	NaN	NaN	NaN	NaN	NaN	NaN	24.5231	27.3169	27.5659	NaN	27.3314	NaN	NaN	28.5016	NaN	27.9289	NaN	NaN	27.5574	27.2308	26.8496
Q99719	Septin-5	SEPT5	24.9863	25.1268	NaN	25.3314	NaN	NaN	NaN	NaN	NaN	NaN	NaN	NaN	24.4472	NaN	NaN	NaN	NaN	NaN	NaN	NaN	NaN	NaN	NaN	NaN	NaN	NaN	NaN	NaN	NaN	NaN	NaN	NaN	NaN	NaN	NaN	NaN	NaN	NaN	NaN	NaN	NaN	NaN	NaN	NaN	NaN	NaN	NaN
Q14141	Septin-6	SEPT6	26.2445	26.5978	NaN	NaN	NaN	NaN	NaN	NaN	NaN	NaN	NaN	NaN	NaN	NaN	NaN	NaN	NaN	NaN	NaN	NaN	NaN	NaN	NaN	NaN	NaN	NaN	NaN	NaN	NaN	NaN	NaN	NaN	NaN	NaN	NaN	NaN	NaN	NaN	NaN	NaN	NaN	NaN	NaN	NaN	NaN	NaN	NaN
Q16181	Septin-7	SEPT7	28.9264	29.0837	25.83	28.6264	24.6932	24.3798	NaN	NaN	NaN	NaN	NaN	25.9738	27.3429	26.8817	26.5999	25.8505	NaN	NaN	NaN	NaN	NaN	25.5015	27.6746	25.7475	24.6113	NaN	NaN	NaN	NaN	NaN	NaN	NaN	NaN	27.6839	26.7199	24.5725	26.7375	NaN	25.7834	NaN	NaN	NaN	NaN	NaN	NaN	27.2206	NaN
Q92599	Septin-8	SEPT8	25.3465	25.9254	NaN	25.4184	NaN	NaN	NaN	NaN	NaN	NaN	NaN	24.6002	24.9436	NaN	NaN	25.1826	NaN	NaN	NaN	NaN	NaN	NaN	24.7325	NaN	NaN	NaN	NaN	NaN	NaN	NaN	NaN	NaN	NaN	25.1283	NaN	NaN	NaN	NaN	NaN	NaN	NaN	NaN	NaN	NaN	NaN	NaN	NaN
Q9UHD8	Septin-9	SEPT9	26.7127	26.5075	NaN	26.5951	NaN	NaN	NaN	NaN	NaN	NaN	NaN	NaN	NaN	NaN	NaN	NaN	NaN	NaN	NaN	NaN	NaN	NaN	NaN	NaN	NaN	NaN	NaN	NaN	NaN	NaN	NaN	NaN	NaN	NaN	NaN	NaN	NaN	NaN	NaN	NaN	NaN	NaN	NaN	NaN	NaN	NaN	NaN
Q9P0V9	Septin-10	SEPT10	22.662	23.8612	NaN	24.4889	NaN	NaN	NaN	NaN	NaN	NaN	NaN	NaN	NaN	NaN	NaN	NaN	NaN	NaN	NaN	NaN	NaN	NaN	NaN	NaN	NaN	NaN	NaN	NaN	NaN	NaN	NaN	NaN	NaN	NaN	NaN	NaN	NaN	NaN	NaN	NaN	NaN	NaN	NaN	NaN	NaN	NaN	NaN
Q9NVA2	Septin-11	SEPT11	28.631	28.8238	NaN	29.0241	NaN	NaN	NaN	NaN	NaN	NaN	NaN	25.724	26.8005	NaN	NaN	NaN	NaN	NaN	NaN	NaN	NaN	25.235	27.626	NaN	NaN	NaN	NaN	NaN	NaN	NaN	NaN	NaN	NaN	25.0098	24.9757	NaN	25.2611	NaN	NaN	NaN	NaN	NaN	NaN	NaN	NaN	26.8131	NaN
O60613	15 kDa selenoprotein	SEPT15	23.1327	NaN	NaN	NaN	NaN	NaN	NaN	NaN	NaN	NaN	NaN	NaN	NaN	NaN	NaN	NaN	NaN	NaN	NaN	NaN	NaN	NaN	NaN	NaN	NaN	NaN	NaN	NaN	NaN	NaN	NaN	NaN	NaN	NaN	NaN	NaN	NaN	NaN	NaN	NaN	NaN	NaN	NaN	NaN	NaN	NaN	NaN
P04217	Alpha-1B-glycoprotein	A1BG	31.4661	31.736	31.4794	31.5389	32.5172	32.5009	33.8977	32.1185	32.4762	33.387	33.9543	32.4877	25.0358	NaN	24.6975	22.7287	22.6737	NaN	NaN	NaN	24.7249	21.4635	29.8686	30.5613	30.6123	29.9048	31.4945	31.8083	33.0962	32.3859	31.8878	32.3972	33.0098	26.6799	24.281	NaN	23.9202	NaN	NaN	NaN	NaN	19.1834	NaN	25.014	25.7449	28.6567	28.7212
P01023	Alpha-2-macroglobulin	A2M	33.6015	34.3586	34.6479	32.6631	36.0586	35.5461	35.9688	35.4342	35.6026	35.6967	36.4617	34.663	31.1676	30.9001	29.47	32.8458	32.1233	33.3741	32.9226	32.9452	33.6437	33.6599	32.7763	32.9366	34.0016	33.7506	33.6118	34.6625	35.7765	35.2943	35.8391	35.2778	36.514	27.7705	31.3476	31.0868	30.063	31.4378	30.7234	32.7164	32.6637	32.3676	32.457	32.8359	32.382	32.9286	34.8314
Q9NPC4	Lactosylceramide 4-alpha-galactosyltransferase	A4GALT	NaN	NaN	NaN	NaN	NaN	NaN	NaN	NaN	NaN	NaN	NaN	NaN	NaN	NaN	NaN	NaN	NaN	NaN	NaN	NaN	NaN	NaN	NaN	24.3215	NaN	25.9067	NaN	NaN	NaN	NaN	NaN	NaN	NaN	NaN	NaN	NaN	NaN	NaN	NaN	NaN	NaN	NaN	NaN	NaN	NaN	NaN	NaN
Q9H7C9	Mth938 domain-containing protein	AAMDC	25.7331	23.7653	26.6862	26.8798	NaN	NaN	NaN	NaN	NaN	NaN	NaN	NaN	NaN	NaN	NaN	NaN	NaN	NaN	NaN	NaN	NaN	NaN	NaN	NaN	NaN	NaN	NaN	NaN	NaN	NaN	NaN	NaN	NaN	NaN	NaN	NaN	NaN	NaN	NaN	NaN	NaN	NaN	NaN	NaN	NaN	NaN	NaN
P49588	Alanine--tRNA ligase, cytoplasmic	AARS	25.2875	26.1908	24.447	25.0429	NaN	NaN	NaN	NaN	NaN	NaN	NaN	23.8709	NaN	25.1567	NaN	NaN	NaN	NaN	NaN	NaN	NaN	NaN	25.0184	NaN	NaN	NaN	NaN	NaN	NaN	NaN	NaN	NaN	NaN	24.5249	NaN	NaN	NaN	NaN	NaN	NaN	NaN	NaN	NaN	NaN	24.4361	24.544	25.1809
Q9NP58	ATP-binding cassette sub-family B member 6, mitochondrial	ABCB6	NaN	NaN	NaN	NaN	NaN	NaN	NaN	NaN	NaN	NaN	NaN	NaN	NaN	NaN	NaN	NaN	NaN	NaN	NaN	NaN	NaN	NaN	NaN	NaN	NaN	NaN	NaN	NaN	NaN	NaN	NaN	NaN	NaN	NaN	NaN	NaN	NaN	NaN	NaN	NaN	23.2727	NaN	NaN	NaN	NaN	NaN	NaN
P61221	ATP-binding cassette sub-family E member 1	ABCE1	NaN	24.0724	NaN	NaN	NaN	NaN	NaN	NaN	NaN	NaN	NaN	NaN	NaN	NaN	NaN	NaN	NaN	NaN	NaN	NaN	NaN	NaN	NaN	NaN	NaN	NaN	NaN	NaN	NaN	NaN	NaN	NaN	NaN	NaN	NaN	NaN	NaN	NaN	NaN	NaN	NaN	NaN	NaN	NaN	NaN	NaN	NaN
Q8NE71	ATP-binding cassette sub-family F member 1	ABCF1	NaN	NaN	NaN	24.1126	NaN	NaN	NaN	NaN	NaN	NaN	NaN	NaN	24.6933	NaN	NaN	NaN	NaN	NaN	NaN	NaN	NaN	NaN	NaN	NaN	NaN	NaN	NaN	NaN	NaN	NaN	NaN	NaN	NaN	NaN	NaN	NaN	NaN	NaN	NaN	NaN	NaN	NaN	NaN	NaN	NaN	NaN	NaN
Q9NUJ1	Mycophenolic acid acyl-glucuronide esterase, mitochondrial	ABHD10	NaN	NaN	NaN	NaN	NaN	NaN	NaN	NaN	NaN	NaN	NaN	NaN	NaN	NaN	NaN	NaN	NaN	NaN	NaN	NaN	NaN	NaN	NaN	NaN	NaN	NaN	NaN	NaN	NaN	NaN	NaN	NaN	NaN	NaN	NaN	NaN	NaN	NaN	NaN	NaN	NaN	NaN	NaN	NaN	NaN	NaN	NaN
Q96IU4	Alpha/beta hydrolase domain-containing protein 14B	ABHD14B	26.2489	27.0224	NaN	26.1964	NaN	NaN	NaN	NaN	NaN	NaN	NaN	NaN	NaN	NaN	NaN	NaN	NaN	NaN	NaN	NaN	NaN	NaN	25.5662	NaN	NaN	NaN	NaN	NaN	NaN	25.2856	NaN	NaN	NaN	NaN	NaN	NaN	NaN	NaN	NaN	NaN	NaN	NaN	NaN	NaN	NaN	NaN	NaN
Q8IZP0	Abl interactor 1	ABI1	NaN	24.0309	NaN	NaN	NaN	NaN	NaN	NaN	NaN	NaN	NaN	NaN	NaN	NaN	NaN	NaN	NaN	NaN	NaN	NaN	NaN	NaN	NaN	NaN	NaN	NaN	NaN	NaN	NaN	NaN	NaN	NaN	NaN	NaN	NaN	NaN	NaN	NaN	NaN	NaN	NaN	NaN	NaN	NaN	NaN	NaN	NaN
Q7Z7G0	Target of Nesh-SH3	ABI3BP	33.9966	33.2697	34.1499	32.7407	36.5246	34.1197	34.9045	34.3299	34.792	35.5505	34.713	37.4418	37.6356	37.5906	37.5065	37.7849	38.2952	37.3858	36.8597	37.1398	37.3076	37.4212	34.6481	35.5882	32.9268	35.8205	36.5326	36.6903	35.2561	35.5518	33.8788	35.773	34.4203	36.9189	37.5614	37.2784	37.3547	37.7747	37.4838	37.0737	36.6717	36.7782	37.4993	36.6651	36.677	36.5516	36.3769
Q6H8Q1	Actin-binding LIM protein 2	ABLIM2	NaN	NaN	NaN	23.6606	NaN	NaN	NaN	NaN	NaN	NaN	NaN	NaN	NaN	NaN	NaN	NaN	NaN	NaN	NaN	NaN	NaN	NaN	NaN	NaN	NaN	NaN	NaN	NaN	NaN	NaN	NaN	NaN	NaN	NaN	NaN	NaN	NaN	NaN	NaN	NaN	NaN	NaN	NaN	NaN	NaN	NaN	NaN
Q9P1F3	Costars family protein ABRACL	ABRACL	NaN	NaN	NaN	24.4568	NaN	NaN	NaN	NaN	NaN	NaN	NaN	NaN	NaN	NaN	NaN	NaN	NaN	NaN	NaN	NaN	NaN	NaN	NaN	NaN	NaN	NaN	NaN	NaN	NaN	NaN	NaN	NaN	NaN	NaN	NaN	NaN	NaN	NaN	NaN	NaN	NaN	NaN	NaN	NaN	NaN	NaN	NaN
P09110	3-ketoacyl-CoA thiolase, peroxisomal	ACAA1	NaN	NaN	NaN	23.0781	NaN	NaN	NaN	NaN	NaN	NaN	NaN	NaN	NaN	NaN	NaN	NaN	NaN	NaN	NaN	NaN	NaN	NaN	NaN	NaN	NaN	NaN	NaN	NaN	NaN	NaN	NaN	NaN	NaN	NaN	NaN	NaN	NaN	NaN	NaN	NaN	NaN	NaN	NaN	NaN	NaN	NaN	NaN
P42765	3-ketoacyl-CoA thiolase, mitochondrial	ACAA2	28.764	26.4663	NaN	28.5937	NaN	24.0107	NaN	NaN	NaN	NaN	NaN	25.0601	NaN	NaN	23.6735	NaN	NaN	NaN	NaN	NaN	24.7563	NaN	24.5226	NaN	NaN	23.6113	NaN	24.1384	NaN	NaN	NaN	NaN	NaN	24.6733	NaN	NaN	NaN	NaN	NaN	NaN	NaN	24.1067	NaN	24.3676	NaN	NaN	24.3568
P11310	Medium-chain specific acyl-CoA dehydrogenase, mitochondrial	ACADM	25.7093	NaN	NaN	26.9483	NaN	NaN	NaN	NaN	NaN	NaN	25.9109	NaN	NaN	NaN	NaN	NaN	NaN	NaN	NaN	NaN	NaN	NaN	NaN	NaN	NaN	NaN	NaN	NaN	NaN	NaN	NaN	NaN	NaN	NaN	NaN	NaN	NaN	NaN	NaN	NaN	NaN	NaN	NaN	NaN	NaN	NaN	NaN
P16219	Short-chain specific acyl-CoA dehydrogenase, mitochondrial	ACADS	NaN	NaN	NaN	NaN	NaN	NaN	NaN	NaN	NaN	NaN	NaN	NaN	NaN	NaN	NaN	NaN	NaN	NaN	NaN	NaN	NaN	NaN	NaN	NaN	NaN	NaN	NaN	NaN	NaN	NaN	NaN	NaN	NaN	NaN	NaN	NaN	NaN	NaN	NaN	NaN	NaN	NaN	NaN	NaN	NaN	NaN	NaN
P49748	Very long-chain specific acyl-CoA dehydrogenase, mitochondrial	ACADVL	28.7379	28.7273	26.3753	29.0956	24.3058	25.058	25.3702	NaN	28.0228	25.0059	25.257	NaN	24.5632	NaN	NaN	NaN	NaN	27.0288	NaN	27.174	29.2791	NaN	26.6725	27.0329	NaN	28.6919	NaN	NaN	25.2071	NaN	NaN	NaN	NaN	27.1549	23.5689	NaN	25.704	NaN	27.369	27.2688	NaN	25.3254	NaN	28.2435	25.3605	25.5851	NaN
P16112	Aggrecan core protein;Aggrecan core protein 2	ACAN	37.5598	35.0118	37.1545	33.6426	38.6397	38.2389	37.9816	36.9034	36.8676	38.1517	37.3354	39.6422	39.7689	39.4926	39.219	40.5669	40.0424	39.7046	39.5979	39.715	39.9502	40.1129	38.6394	39.1977	37.9718	38.7288	39.6353	39.3382	37.9623	38.6378	36.5932	38.3607	36.6753	38.041	39.7391	39.2447	38.9589	39.7216	39.2533	39.5044	39.7984	39.5437	39.7132	39.3513	39.653	39.4585	38.7107
P24752	Acetyl-CoA acetyltransferase, mitochondrial	ACAT1	29.8083	27.3054	29.0999	29.9123	28.7422	28.2172	28.9043	NaN	NaN	NaN	28.3632	29.7432	31.3444	NaN	31.0348	NaN	30.3156	27.8987	NaN	NaN	NaN	29.6943	28.3288	NaN	29.6831	28.2108	29.5281	NaN	28.5533	NaN	28.361	NaN	27.9818	29.4556	NaN	NaN	28.8021	NaN	NaN	NaN	NaN	NaN	NaN	NaN	28.5217	29.5038	28.9714
Q9H3P7	Golgi resident protein GCP60	ACBD3	24.2684	24.8718	NaN	NaN	NaN	NaN	NaN	NaN	NaN	NaN	NaN	NaN	NaN	NaN	NaN	NaN	NaN	NaN	NaN	NaN	NaN	NaN	NaN	NaN	NaN	NaN	NaN	NaN	NaN	NaN	NaN	NaN	NaN	NaN	NaN	NaN	NaN	NaN	NaN	NaN	NaN	NaN	NaN	NaN	NaN	NaN	NaN
Q9UKV3	Apoptotic chromatin condensation inducer in the nucleus	ACIN1	NaN	23.5663	NaN	NaN	NaN	NaN	NaN	NaN	NaN	NaN	NaN	NaN	NaN	NaN	NaN	NaN	NaN	NaN	NaN	NaN	NaN	NaN	NaN	NaN	NaN	NaN	NaN	NaN	NaN	NaN	NaN	NaN	NaN	NaN	NaN	NaN	NaN	NaN	NaN	NaN	NaN	NaN	NaN	NaN	NaN	NaN	NaN
P53396	ATP-citrate synthase	ACLY	24.7476	25.6165	25.8724	25.0354	25.1447	25.6099	27.3668	26.6664	NaN	NaN	26.6064	26.3924	25.3739	26.5772	26.0838	26.2177	NaN	NaN	NaN	NaN	NaN	NaN	24.9099	26.349	27.2654	NaN	NaN	NaN	NaN	26.8953	25.8912	NaN	27.0077	26.6559	25.1563	NaN	NaN	25.8271	NaN	NaN	NaN	27.8265	NaN	NaN	27.8419	27.2388	25.8552
P21399	Cytoplasmic aconitate hydratase	ACO1	29.5032	29.0979	25.4002	29.6553	23.9975	26.1598	27.227	25.6025	NaN	NaN	NaN	NaN	25.6627	NaN	NaN	25.3569	NaN	NaN	NaN	NaN	NaN	NaN	27.3182	NaN	25.018	NaN	NaN	NaN	NaN	NaN	NaN	NaN	NaN	NaN	NaN	NaN	NaN	NaN	NaN	NaN	NaN	NaN	NaN	NaN	25.6824	25.9527	NaN
Q99798	Aconitate hydratase, mitochondrial	ACO2	30.8881	28.4835	NaN	31.3959	22.3475	22.294	22.2061	NaN	NaN	NaN	NaN	23.9385	26.0981	23.952	26.0675	22.656	22.1988	22.9509	25.0075	24.8372	NaN	24.76	26.4367	22.6231	NaN	24.2362	24.6782	NaN	22.6909	22.1906	NaN	NaN	NaN	27.1387	22.563	NaN	26.3687	24.2207	NaN	23.021	NaN	NaN	NaN	23.6134	24.1533	25.1055	22.7807
Q86TX2;P49753	Acyl-coenzyme A thioesterase 1;Acyl-coenzyme A thioesterase 2, mitochondrial	ACOT1;ACOT2	NaN	NaN	NaN	NaN	NaN	NaN	NaN	NaN	NaN	NaN	NaN	NaN	NaN	NaN	NaN	NaN	NaN	NaN	NaN	NaN	NaN	NaN	NaN	NaN	NaN	NaN	NaN	NaN	NaN	NaN	NaN	NaN	NaN	NaN	NaN	NaN	NaN	NaN	NaN	NaN	NaN	NaN	NaN	NaN	NaN	NaN	NaN
Q9Y305	Acyl-coenzyme A thioesterase 9, mitochondrial	ACOT9	NaN	24.4022	NaN	25.1683	NaN	NaN	NaN	NaN	NaN	NaN	NaN	NaN	NaN	NaN	NaN	NaN	NaN	NaN	NaN	NaN	NaN	NaN	NaN	NaN	NaN	NaN	NaN	NaN	NaN	NaN	NaN	NaN	NaN	NaN	NaN	NaN	NaN	NaN	NaN	NaN	NaN	NaN	NaN	NaN	NaN	NaN	NaN
P24666	Low molecular weight phosphotyrosine protein phosphatase	ACP1	26.4153	25.9787	NaN	27.3784	NaN	NaN	NaN	NaN	NaN	NaN	NaN	NaN	NaN	NaN	NaN	NaN	25.6249	NaN	NaN	NaN	NaN	NaN	26.7093	NaN	26.3854	NaN	NaN	NaN	NaN	NaN	NaN	NaN	NaN	NaN	NaN	NaN	NaN	NaN	NaN	NaN	NaN	NaN	NaN	NaN	NaN	NaN	NaN
P11117	Lysosomal acid phosphatase	ACP2	NaN	NaN	NaN	NaN	NaN	NaN	NaN	NaN	NaN	NaN	NaN	NaN	NaN	NaN	NaN	NaN	NaN	NaN	NaN	NaN	NaN	NaN	NaN	NaN	NaN	NaN	NaN	NaN	NaN	NaN	NaN	NaN	NaN	NaN	NaN	NaN	NaN	NaN	NaN	NaN	NaN	NaN	NaN	NaN	NaN	NaN	NaN
P33121	Long-chain-fatty-acid--CoA ligase 1	ACSL1	25.5775	NaN	NaN	25.2399	NaN	NaN	NaN	NaN	NaN	NaN	NaN	NaN	24.5383	NaN	NaN	NaN	NaN	NaN	NaN	NaN	NaN	NaN	NaN	NaN	NaN	NaN	NaN	NaN	NaN	NaN	NaN	NaN	NaN	25.1727	NaN	NaN	NaN	NaN	NaN	NaN	NaN	NaN	NaN	NaN	NaN	NaN	NaN
O95573;O60488	Long-chain-fatty-acid--CoA ligase 3;Long-chain-fatty-acid--CoA ligase 4	ACSL3;ACSL4	NaN	NaN	NaN	NaN	NaN	NaN	NaN	NaN	NaN	NaN	NaN	NaN	NaN	NaN	NaN	NaN	NaN	NaN	NaN	NaN	NaN	NaN	NaN	NaN	NaN	NaN	NaN	NaN	NaN	NaN	NaN	NaN	NaN	NaN	NaN	NaN	NaN	NaN	NaN	NaN	NaN	NaN	NaN	NaN	NaN	NaN	NaN
P68133	Actin, alpha skeletal muscle	ACTA1	31.541	28.9331	28.4826	31.382	27.9013	27.548	27.3085	NaN	NaN	25.4805	27.1924	26.6656	28.467	27.7433	27.9574	28.5622	28.7006	27.5179	29.8915	27.1074	26.7552	28.1698	29.8707	28.4347	28.9247	26.7591	27.0384	27.7281	26.6798	28.2185	28.4675	27.5233	27.551	29.9791	28.7715	26.9284	28.3452	29.0337	27.1542	29.6767	23.8801	29.7657	NaN	NaN	26.6377	29.4151	26.2948
P62736;P63267	Actin, aortic smooth muscle;Actin, gamma-enteric smooth muscle	ACTA2;ACTG2	35.57	33.8646	31.6667	35.7879	30.4742	31.0279	29.555	30.6663	30.6396	30.2545	29.3088	31.9187	33.0749	32.6476	32.4174	32.2922	32.5953	32.8463	33.4856	32.1492	32.1077	33.0764	33.2849	31.4722	32.1181	31.3703	31.0087	30.3963	29.8961	30.5032	30.8498	29.0454	31.1434	34.287	32.0852	31.5181	33.9348	33.2351	31.668	32.1203	31.4375	33.9595	31.0831	31.0989	31.8535	32.9186	31.4766
P60709	Actin, cytoplasmic 1;Actin, cytoplasmic 1, N-terminally processed	ACTB	NaN	NaN	NaN	NaN	NaN	NaN	NaN	NaN	NaN	NaN	NaN	NaN	NaN	NaN	NaN	NaN	NaN	NaN	NaN	NaN	NaN	NaN	NaN	NaN	NaN	NaN	NaN	NaN	NaN	NaN	NaN	NaN	NaN	NaN	NaN	NaN	NaN	NaN	NaN	NaN	NaN	NaN	NaN	NaN	NaN	NaN	NaN
Q562R1	Beta-actin-like protein 2	ACTBL2	NaN	NaN	NaN	NaN	NaN	NaN	NaN	NaN	NaN	NaN	NaN	NaN	NaN	NaN	NaN	NaN	NaN	NaN	NaN	NaN	NaN	NaN	NaN	NaN	NaN	NaN	NaN	NaN	NaN	NaN	NaN	NaN	NaN	NaN	NaN	NaN	NaN	NaN	NaN	NaN	NaN	NaN	27.4436	NaN	NaN	NaN	NaN
P63261	Actin, cytoplasmic 2;Actin, cytoplasmic 2, N-terminally processed	ACTG1	33.945	34.7583	32.1321	33.5913	30.878	31.7891	29.845	31.2105	30.9644	30.3899	29.8628	31.6282	33.2665	32.3088	32.1476	32.1413	31.279	31.7948	31.2983	32.0967	31.5097	31.6194	33.5845	31.9306	32.2837	31.5037	30.8422	31.1969	30.2302	30.1296	31.8766	29.5086	30.7139	32.6574	32.1477	32.2042	33.185	31.7317	31.0778	30.2216	31.188	31.5815	30.6264	30.5733	31.8541	33.0975	32.0865
O96019	Actin-like protein 6A	ACTL6A	NaN	24.5441	NaN	24.8547	NaN	NaN	NaN	NaN	NaN	NaN	NaN	NaN	NaN	NaN	NaN	NaN	NaN	NaN	NaN	NaN	NaN	NaN	NaN	NaN	NaN	NaN	NaN	NaN	NaN	NaN	NaN	NaN	NaN	NaN	NaN	NaN	NaN	NaN	NaN	NaN	NaN	NaN	NaN	NaN	NaN	NaN	NaN
P12814	Alpha-actinin-1	ACTN1	30.2948	31.1737	25.205	30.1425	25.6696	25.518	24.3631	24.1896	24.0295	25.09	22.5895	27.6156	29.6552	28.5009	28.7441	27.0692	26.403	26.6432	NaN	25.6075	27.2199	27.2733	30.1336	27.4241	27.6613	24.5921	25.7461	25.6033	24.8748	25.2687	24.4928	NaN	24.1769	29.2865	28.7788	28.8131	28.5496	26.8202	24.312	27.4737	NaN	24.2268	24.8129	NaN	26.3705	27.9711	26.7754
P35609	Alpha-actinin-2	ACTN2	33.4129	30.3057	27.5341	33.6533	28.0694	27.6571	28.5322	26.8287	27.0484	27.8168	25.6929	28.5507	29.195	27.672	28.8404	29.0584	28.9902	29.811	30.5603	28.5313	28.4135	29.2605	29.2636	27.765	28.741	27.6319	27.1728	27.5971	27.3456	27.597	27.8398	27.5802	27.4121	31.3704	28.3867	27.4803	29.5873	29.8574	23.9912	28.8345	25.9328	29.8565	23.5509	26.7379	27.4569	28.5151	28.5587
Q08043	Alpha-actinin-3	ACTN3	32.3969	24.035	27.95	32.2475	NaN	22.7425	NaN	NaN	24.8112	25.6926	23.5093	24.1586	24.1758	NaN	23.2401	26.1293	26.652	25.8403	25.3882	NaN	NaN	NaN	23.3333	24.8817	28.0863	24.5299	24.5145	NaN	24.6635	26.4823	28.5841	NaN	25.5521	27.1759	25.2937	NaN	NaN	NaN	23.7085	NaN	NaN	26.5776	NaN	NaN	23.8548	24.9123	28.6624
O43707	Alpha-actinin-4	ACTN4	30.9072	31.3415	28.5226	31.0519	27.9006	27.6465	26.7226	24.4865	26.0883	25.1948	NaN	28.8517	30.3947	29.5975	29.3936	29.6927	28.8036	29.267	28.2882	28.0537	28.8004	29.5576	30.397	28.8337	29.3957	29.5452	27.4777	25.943	27.813	25.0728	26.2357	NaN	NaN	30.5236	29.8394	28.7357	29.5152	27.9804	29.28	27.136	29.817	27.9792	26.3529	28.5844	26.4257	29.7075	28.8919
Q9NZ32	Actin-related protein 10	ACTR10	NaN	NaN	NaN	NaN	NaN	NaN	NaN	NaN	NaN	NaN	NaN	NaN	NaN	NaN	NaN	NaN	NaN	NaN	NaN	NaN	NaN	NaN	NaN	NaN	NaN	NaN	NaN	24.1608	NaN	NaN	NaN	NaN	NaN	NaN	NaN	NaN	NaN	NaN	NaN	NaN	NaN	NaN	NaN	NaN	NaN	NaN	NaN
P61163	Alpha-centractin	ACTR1A	26.3801	27.0471	NaN	27.2214	24.0546	25.1912	NaN	NaN	NaN	NaN	NaN	NaN	25.9939	NaN	NaN	NaN	NaN	NaN	NaN	NaN	NaN	24.6463	26.2866	NaN	NaN	NaN	NaN	NaN	NaN	NaN	NaN	NaN	NaN	26.6241	25.312	NaN	NaN	NaN	NaN	NaN	NaN	NaN	NaN	NaN	NaN	25.5888	NaN
P42025	Beta-centractin	ACTR1B	NaN	NaN	NaN	24.8423	NaN	NaN	NaN	NaN	NaN	NaN	NaN	NaN	NaN	NaN	NaN	NaN	NaN	NaN	NaN	NaN	NaN	NaN	NaN	NaN	NaN	NaN	NaN	NaN	NaN	NaN	NaN	NaN	NaN	NaN	NaN	NaN	NaN	NaN	NaN	NaN	NaN	NaN	NaN	NaN	NaN	NaN	NaN
P61160	Actin-related protein 2	ACTR2	27.5487	28.2838	26.7287	26.4819	NaN	NaN	NaN	NaN	NaN	NaN	NaN	NaN	27.5305	28.1979	27.8618	NaN	26.1298	NaN	NaN	NaN	27.5461	NaN	25.8165	26.2101	28.092	28.3945	NaN	NaN	NaN	NaN	NaN	NaN	NaN	27.5166	26.6473	NaN	28.2613	NaN	26.5902	NaN	NaN	NaN	NaN	NaN	28.3319	NaN	27.6222
P61158	Actin-related protein 3	ACTR3	26.4851	28.9812	25.766	27.2486	NaN	25.8457	26.8087	NaN	25.0751	26.0768	26.5132	25.7649	27.0234	NaN	26.4508	NaN	26.8741	26.3365	NaN	NaN	26.8833	NaN	27.209	25.9015	27.3048	27.1242	NaN	NaN	NaN	25.2276	NaN	NaN	26.8676	27.1536	26.0576	28.3601	27.6657	25.8127	NaN	NaN	NaN	NaN	NaN	NaN	NaN	27.5872	27.1767
Q03154	Aminoacylase-1	ACY1	NaN	NaN	NaN	24.6804	NaN	NaN	NaN	NaN	NaN	NaN	NaN	NaN	NaN	NaN	NaN	NaN	NaN	NaN	NaN	NaN	NaN	NaN	NaN	NaN	NaN	NaN	NaN	NaN	NaN	NaN	NaN	NaN	NaN	NaN	NaN	NaN	NaN	NaN	NaN	NaN	NaN	NaN	NaN	NaN	NaN	NaN	NaN
P14621	Acylphosphatase-2	ACYP2	24.3802	NaN	NaN	NaN	NaN	NaN	NaN	NaN	NaN	NaN	NaN	NaN	NaN	NaN	NaN	NaN	NaN	NaN	NaN	NaN	NaN	NaN	NaN	NaN	NaN	NaN	NaN	NaN	NaN	NaN	NaN	NaN	NaN	NaN	NaN	NaN	NaN	NaN	NaN	NaN	NaN	NaN	NaN	NaN	NaN	NaN	NaN
P00813	Adenosine deaminase	ADA	NaN	23.0788	NaN	NaN	NaN	NaN	NaN	NaN	NaN	NaN	NaN	NaN	NaN	NaN	NaN	NaN	NaN	NaN	NaN	NaN	NaN	NaN	NaN	NaN	NaN	NaN	NaN	NaN	NaN	NaN	NaN	NaN	NaN	NaN	NaN	NaN	NaN	NaN	NaN	NaN	NaN	NaN	NaN	NaN	NaN	NaN	NaN
O14672	Disintegrin and metalloproteinase domain-containing protein 10	ADAM10	NaN	23.8397	NaN	NaN	NaN	NaN	NaN	NaN	NaN	NaN	NaN	NaN	NaN	NaN	NaN	NaN	NaN	NaN	NaN	NaN	NaN	NaN	NaN	NaN	NaN	NaN	NaN	NaN	NaN	NaN	NaN	NaN	NaN	NaN	NaN	NaN	NaN	NaN	NaN	NaN	NaN	NaN	NaN	NaN	NaN	NaN	NaN
O43184	Disintegrin and metalloproteinase domain-containing protein 12	ADAM12	NaN	NaN	NaN	NaN	NaN	NaN	NaN	NaN	NaN	NaN	NaN	NaN	NaN	NaN	NaN	NaN	NaN	NaN	NaN	NaN	NaN	NaN	NaN	NaN	NaN	NaN	NaN	NaN	NaN	NaN	NaN	NaN	NaN	NaN	NaN	NaN	NaN	NaN	NaN	NaN	NaN	NaN	NaN	NaN	NaN	NaN	24.5897
Q13444	Disintegrin and metalloproteinase domain-containing protein 15	ADAM15	NaN	NaN	NaN	NaN	NaN	NaN	NaN	NaN	NaN	NaN	NaN	NaN	NaN	NaN	NaN	NaN	NaN	NaN	NaN	NaN	NaN	NaN	NaN	NaN	NaN	NaN	NaN	NaN	NaN	NaN	NaN	NaN	NaN	NaN	NaN	NaN	NaN	NaN	NaN	NaN	NaN	NaN	NaN	26.8484	NaN	NaN	NaN
P78536	Disintegrin and metalloproteinase domain-containing protein 17	ADAM17	NaN	NaN	NaN	NaN	NaN	NaN	NaN	NaN	NaN	NaN	NaN	NaN	NaN	NaN	NaN	23.5727	NaN	NaN	NaN	NaN	NaN	NaN	NaN	NaN	NaN	NaN	NaN	NaN	NaN	NaN	NaN	NaN	NaN	NaN	NaN	NaN	NaN	NaN	NaN	NaN	NaN	NaN	NaN	NaN	NaN	NaN	NaN
Q9UHI8	A disintegrin and metalloproteinase with thrombospondin motifs 1	ADAMTS1	NaN	NaN	23.9524	NaN	NaN	NaN	NaN	NaN	NaN	NaN	NaN	NaN	NaN	NaN	NaN	NaN	NaN	NaN	NaN	NaN	NaN	NaN	NaN	NaN	NaN	NaN	NaN	NaN	NaN	NaN	NaN	NaN	NaN	NaN	NaN	NaN	NaN	NaN	NaN	NaN	NaN	NaN	NaN	NaN	NaN	NaN	NaN
Q8TE57	A disintegrin and metalloproteinase with thrombospondin motifs 16	ADAMTS16	NaN	NaN	NaN	NaN	NaN	NaN	NaN	NaN	NaN	NaN	NaN	NaN	NaN	NaN	NaN	NaN	NaN	NaN	NaN	NaN	NaN	NaN	NaN	NaN	NaN	NaN	NaN	NaN	NaN	NaN	NaN	NaN	NaN	NaN	NaN	NaN	NaN	NaN	NaN	NaN	NaN	NaN	NaN	NaN	NaN	NaN	NaN
O95450	A disintegrin and metalloproteinase with thrombospondin motifs 2	ADAMTS2	NaN	NaN	NaN	NaN	NaN	NaN	NaN	NaN	NaN	NaN	NaN	NaN	NaN	NaN	NaN	NaN	NaN	NaN	NaN	NaN	NaN	NaN	NaN	NaN	NaN	NaN	23.5963	NaN	NaN	NaN	NaN	NaN	NaN	NaN	NaN	NaN	NaN	NaN	NaN	NaN	NaN	NaN	NaN	NaN	NaN	NaN	NaN
Q86TH1	ADAMTS-like protein 2	ADAMTSL2	NaN	24.8391	NaN	NaN	NaN	24.2013	25.9501	NaN	24.9802	25.4077	26.5894	NaN	NaN	NaN	NaN	24.8224	NaN	NaN	NaN	NaN	NaN	NaN	NaN	NaN	NaN	NaN	25.5082	NaN	25.7321	26.1113	25.0968	26.9009	25.8703	NaN	NaN	NaN	NaN	NaN	NaN	25.4403	NaN	NaN	NaN	NaN	NaN	NaN	NaN
P82987	ADAMTS-like protein 3	ADAMTSL3	NaN	NaN	NaN	NaN	NaN	NaN	NaN	NaN	NaN	NaN	NaN	NaN	NaN	NaN	NaN	NaN	NaN	NaN	NaN	NaN	NaN	NaN	NaN	24.082	NaN	NaN	NaN	NaN	NaN	NaN	NaN	NaN	NaN	NaN	NaN	NaN	NaN	NaN	NaN	NaN	NaN	NaN	NaN	NaN	NaN	NaN	NaN
Q6UY14	ADAMTS-like protein 4	ADAMTSL4	24.2515	24.6116	NaN	24.4126	NaN	NaN	NaN	NaN	NaN	NaN	NaN	22.6508	23.9918	NaN	NaN	NaN	NaN	NaN	NaN	NaN	NaN	NaN	NaN	NaN	NaN	NaN	NaN	NaN	NaN	NaN	NaN	NaN	NaN	NaN	NaN	NaN	NaN	NaN	NaN	NaN	NaN	NaN	NaN	NaN	NaN	NaN	NaN
P55265	Double-stranded RNA-specific adenosine deaminase	ADAR	NaN	NaN	NaN	19.8042	NaN	NaN	NaN	NaN	NaN	NaN	NaN	NaN	NaN	NaN	NaN	NaN	NaN	NaN	NaN	NaN	NaN	NaN	NaN	NaN	NaN	NaN	NaN	NaN	NaN	NaN	NaN	NaN	NaN	NaN	NaN	NaN	NaN	NaN	NaN	NaN	NaN	NaN	NaN	NaN	NaN	NaN	NaN
P35611	Alpha-adducin	ADD1	25.5024	25.5819	NaN	25.4139	NaN	NaN	NaN	NaN	NaN	NaN	NaN	NaN	NaN	NaN	NaN	NaN	NaN	NaN	NaN	NaN	NaN	NaN	24.8546	NaN	NaN	NaN	NaN	NaN	NaN	NaN	NaN	NaN	NaN	NaN	NaN	NaN	NaN	NaN	NaN	NaN	NaN	NaN	NaN	NaN	NaN	NaN	NaN
Q9UEY8	Gamma-adducin	ADD3	25.7432	25.6377	NaN	25.7756	23.8369	NaN	NaN	NaN	25.4794	NaN	25.5373	NaN	24.5854	NaN	NaN	NaN	NaN	NaN	26.3022	NaN	NaN	NaN	25.1479	NaN	NaN	NaN	NaN	NaN	NaN	NaN	NaN	NaN	NaN	NaN	NaN	NaN	NaN	NaN	NaN	27.8014	NaN	27.3328	NaN	NaN	NaN	NaN	NaN
P00325;P07327	Alcohol dehydrogenase 1B;Alcohol dehydrogenase 1A	ADH1B;ADH1A	28.8673	29.2756	NaN	30.1	NaN	NaN	NaN	26.0958	NaN	24.3393	NaN	NaN	NaN	NaN	NaN	NaN	25.6752	24.5183	24.3138	NaN	NaN	NaN	25.764	25.4943	24.7079	25.1678	26.6364	NaN	NaN	NaN	NaN	NaN	NaN	NaN	NaN	NaN	NaN	NaN	NaN	NaN	23.9354	NaN	NaN	NaN	26.4784	26.0303	24.196
P00326	Alcohol dehydrogenase 1C	ADH1C	NaN	25.7459	NaN	NaN	NaN	NaN	NaN	NaN	NaN	NaN	NaN	NaN	NaN	NaN	NaN	NaN	NaN	NaN	NaN	NaN	NaN	NaN	NaN	NaN	NaN	NaN	NaN	NaN	NaN	NaN	NaN	NaN	NaN	NaN	NaN	NaN	NaN	NaN	NaN	NaN	NaN	NaN	NaN	NaN	NaN	NaN	NaN
P08319	Alcohol dehydrogenase 4	ADH4	NaN	NaN	NaN	NaN	NaN	NaN	NaN	NaN	NaN	NaN	NaN	NaN	NaN	NaN	NaN	NaN	NaN	NaN	NaN	NaN	NaN	NaN	NaN	NaN	NaN	NaN	NaN	NaN	NaN	NaN	NaN	NaN	NaN	NaN	NaN	NaN	NaN	NaN	NaN	NaN	NaN	NaN	NaN	NaN	NaN	NaN	NaN
P11766	Alcohol dehydrogenase class-3	ADH5	29.0583	29.0796	26.6421	28.395	23.9492	24.7654	NaN	26.0478	26.2402	25.746	NaN	25.7228	27.3702	26.6697	26.0834	23.9032	NaN	26.8553	NaN	25.8943	NaN	26.2131	27.882	26.1048	27.1522	NaN	NaN	NaN	NaN	NaN	NaN	NaN	NaN	25.2913	25.0888	NaN	25.7278	25.931	24.9588	NaN	NaN	NaN	NaN	NaN	26.5902	27.3536	NaN
Q8IWW8	Hydroxyacid-oxoacid transhydrogenase, mitochondrial	ADHFE1	NaN	NaN	NaN	24.2293	NaN	NaN	NaN	NaN	NaN	NaN	NaN	NaN	NaN	NaN	NaN	NaN	NaN	NaN	NaN	NaN	NaN	NaN	NaN	NaN	NaN	NaN	NaN	NaN	NaN	NaN	NaN	NaN	NaN	NaN	NaN	NaN	NaN	NaN	NaN	NaN	NaN	NaN	NaN	NaN	NaN	NaN	NaN
Q15848	Adiponectin	ADIPOQ	25.7705	25.4459	24.6499	25.6014	NaN	25.3441	25.1584	25.1674	25.7381	NaN	24.664	25.6838	NaN	NaN	NaN	NaN	NaN	NaN	NaN	NaN	NaN	NaN	NaN	NaN	NaN	NaN	NaN	25.754	25.0839	NaN	NaN	NaN	NaN	NaN	NaN	NaN	NaN	NaN	NaN	NaN	NaN	NaN	NaN	NaN	NaN	NaN	NaN
Q15847	Adipogenesis regulatory factor	ADIRF	NaN	NaN	NaN	NaN	NaN	NaN	NaN	NaN	NaN	NaN	NaN	NaN	NaN	NaN	NaN	NaN	NaN	NaN	NaN	NaN	NaN	NaN	NaN	NaN	NaN	NaN	NaN	NaN	NaN	NaN	NaN	NaN	NaN	28.1649	NaN	NaN	NaN	NaN	NaN	NaN	NaN	NaN	NaN	NaN	NaN	NaN	NaN
P55263	Adenosine kinase	ADK	NaN	NaN	NaN	24.3008	NaN	NaN	NaN	NaN	NaN	NaN	NaN	NaN	NaN	NaN	NaN	NaN	NaN	NaN	NaN	NaN	NaN	NaN	NaN	NaN	NaN	NaN	NaN	NaN	NaN	NaN	NaN	NaN	NaN	NaN	NaN	NaN	NaN	NaN	NaN	NaN	NaN	NaN	NaN	NaN	NaN	NaN	NaN
Q9BRR6	ADP-dependent glucokinase	ADPGK	NaN	21.1859	NaN	NaN	NaN	NaN	NaN	NaN	NaN	NaN	NaN	NaN	NaN	NaN	NaN	NaN	NaN	NaN	NaN	NaN	NaN	NaN	NaN	NaN	NaN	NaN	NaN	NaN	NaN	NaN	NaN	NaN	NaN	NaN	NaN	NaN	NaN	NaN	NaN	NaN	NaN	NaN	NaN	NaN	NaN	NaN	NaN
Q9NX46	Poly(ADP-ribose) glycohydrolase ARH3	ADPRHL2	23.9686	NaN	NaN	NaN	NaN	NaN	NaN	NaN	NaN	NaN	NaN	NaN	NaN	NaN	NaN	NaN	NaN	NaN	NaN	NaN	NaN	NaN	NaN	NaN	NaN	NaN	NaN	NaN	NaN	NaN	NaN	NaN	NaN	NaN	NaN	NaN	NaN	NaN	NaN	NaN	NaN	NaN	NaN	NaN	NaN	NaN	NaN
Q16186	Proteasomal ubiquitin receptor ADRM1	ADRM1	24.4521	23.2936	NaN	NaN	NaN	NaN	NaN	NaN	NaN	NaN	NaN	NaN	NaN	NaN	NaN	NaN	NaN	NaN	NaN	NaN	NaN	NaN	NaN	NaN	NaN	NaN	NaN	NaN	NaN	NaN	NaN	NaN	NaN	NaN	NaN	NaN	NaN	NaN	NaN	NaN	NaN	NaN	NaN	NaN	NaN	NaN	NaN
P30566	Adenylosuccinate lyase	ADSL	21.6036	NaN	NaN	NaN	NaN	NaN	NaN	NaN	NaN	NaN	NaN	NaN	NaN	NaN	NaN	NaN	NaN	NaN	NaN	NaN	NaN	NaN	NaN	NaN	NaN	NaN	NaN	NaN	NaN	NaN	NaN	NaN	NaN	NaN	NaN	NaN	NaN	NaN	NaN	NaN	NaN	NaN	NaN	NaN	NaN	NaN	NaN
P30520	Adenylosuccinate synthetase isozyme 2	ADSS	NaN	23.749	NaN	NaN	NaN	NaN	NaN	NaN	NaN	NaN	NaN	NaN	NaN	NaN	NaN	NaN	NaN	NaN	NaN	NaN	NaN	NaN	NaN	NaN	NaN	NaN	NaN	NaN	NaN	NaN	NaN	NaN	NaN	NaN	NaN	NaN	NaN	NaN	NaN	NaN	NaN	NaN	NaN	NaN	NaN	NaN	NaN
Q8N142	Adenylosuccinate synthetase isozyme 1	ADSSL1	NaN	NaN	NaN	24.7385	NaN	NaN	NaN	NaN	NaN	NaN	NaN	NaN	NaN	NaN	NaN	NaN	NaN	NaN	NaN	NaN	NaN	NaN	NaN	NaN	NaN	NaN	NaN	NaN	NaN	NaN	NaN	NaN	NaN	NaN	NaN	NaN	NaN	NaN	NaN	NaN	NaN	NaN	NaN	NaN	NaN	NaN	NaN
Q8IUX7	Adipocyte enhancer-binding protein 1	AEBP1	31.1598	32.2549	31.4776	30.6751	31.5557	31.6337	32.9643	31.6219	32.3979	32.8607	32.4939	32.2231	32.7541	32.3244	32.565	32.246	32.613	32.8389	32.4926	33.0623	33.3331	32.9585	31.8783	31.9235	30.9134	31.6079	33.1182	32.9198	32.677	33.3229	31.9012	32.9472	32.5296	32.2627	32.6214	32.3015	32.8922	31.933	32.7812	32.7067	32.7112	32.2497	33.3816	32.321	31.8987	32.5894	33.3315
P43652	Afamin	AFM	29.4959	30.3745	30.1264	28.1145	31.2882	30.3329	32.6255	30.6566	31.1462	31.462	32.426	29.9432	23.9963	NaN	NaN	24.8846	NaN	NaN	26.0043	24.2402	NaN	NaN	27.59	28.4706	29.4484	25.8503	29.8127	29.6037	32.1981	31.8619	31.2772	31.0137	32.1857	NaN	NaN	NaN	23.5475	NaN	25.3291	25.8624	24.2473	23.4234	NaN	23.1156	25.1216	26.7483	25.3165
P20933	N(4)-(beta-N-acetylglucosaminyl)-L-asparaginase;Glycosylasparaginase alpha chain;Glycosylasparaginase beta chain	AGA	NaN	NaN	NaN	23.3943	NaN	NaN	NaN	NaN	NaN	NaN	NaN	NaN	NaN	NaN	NaN	NaN	NaN	NaN	NaN	NaN	NaN	NaN	NaN	NaN	NaN	NaN	NaN	NaN	NaN	NaN	NaN	NaN	NaN	NaN	NaN	NaN	NaN	NaN	NaN	NaN	NaN	NaN	NaN	NaN	NaN	NaN	NaN
Q53H12	Acylglycerol kinase, mitochondrial	AGK	NaN	NaN	NaN	NaN	NaN	NaN	NaN	NaN	NaN	NaN	NaN	NaN	NaN	NaN	NaN	NaN	NaN	NaN	NaN	NaN	NaN	NaN	NaN	NaN	NaN	NaN	NaN	NaN	NaN	NaN	NaN	NaN	NaN	NaN	NaN	NaN	NaN	NaN	NaN	NaN	NaN	NaN	NaN	NaN	NaN	NaN	NaN
P35573	Glycogen debranching enzyme;4-alpha-glucanotransferase;Amylo-alpha-1,6-glucosidase	AGL	29.4944	NaN	NaN	29.2617	NaN	NaN	NaN	NaN	25.0489	NaN	NaN	NaN	25.3683	NaN	27.1676	NaN	NaN	NaN	NaN	NaN	NaN	26.7403	NaN	NaN	NaN	NaN	NaN	NaN	NaN	NaN	NaN	NaN	NaN	NaN	NaN	NaN	27.9711	NaN	NaN	NaN	NaN	NaN	NaN	NaN	NaN	NaN	NaN
Q9UKV8	Protein argonaute-2	AGO2	NaN	23.4266	NaN	NaN	NaN	NaN	NaN	NaN	NaN	NaN	NaN	NaN	NaN	NaN	NaN	NaN	NaN	NaN	NaN	NaN	NaN	NaN	NaN	NaN	NaN	NaN	NaN	NaN	NaN	NaN	NaN	NaN	NaN	NaN	NaN	NaN	NaN	NaN	NaN	NaN	NaN	NaN	NaN	NaN	NaN	NaN	NaN
Q9H9G7;Q9UL18	Protein argonaute-3;Protein argonaute-1	AGO3;AGO1	NaN	NaN	NaN	NaN	NaN	NaN	NaN	NaN	NaN	NaN	NaN	NaN	NaN	NaN	NaN	NaN	NaN	NaN	NaN	NaN	NaN	NaN	NaN	NaN	NaN	NaN	NaN	NaN	NaN	NaN	NaN	NaN	NaN	NaN	NaN	NaN	NaN	NaN	NaN	NaN	NaN	NaN	NaN	NaN	NaN	NaN	NaN
O00468	Agrin;Agrin N-terminal 110 kDa subunit;Agrin C-terminal 110 kDa subunit;Agrin C-terminal 90 kDa fragment;Agrin C-terminal 22 kDa fragment	AGRN	27.526	27.9417	25.3319	29.0014	24.3476	25.394	26.1	NaN	25.6256	24.3115	25.3506	26.1168	25.9857	26.2921	26.9657	25.3791	NaN	26.7484	NaN	NaN	NaN	25.2156	25.696	24.8068	NaN	26.2902	26.2278	NaN	26.5551	NaN	NaN	NaN	NaN	27.2991	26.8098	27.8567	25.8209	NaN	NaN	NaN	NaN	NaN	27.1198	27.3888	25.8752	25.8013	25.809
P01019	Angiotensinogen;Angiotensin-1;Angiotensin-2;Angiotensin-3;Angiotensin-4;Angiotensin 1-9;Angiotensin 1-7;Angiotensin 1-5;Angiotensin 1-4	AGT	28.2581	29.3441	31.0111	26.9928	30.2983	30.921	32.2785	31.3611	31.302	31.5778	31.8847	31.3676	28.0029	27.905	26.7176	29.4283	29.3167	29.9364	29.5486	29.1702	29.8655	29.8772	27.7823	29.1132	29.1504	28.8725	30.8017	31.2679	31.3888	31.1649	31.2523	30.8914	31.7833	27.701	27.9538	NaN	28.538	29.0198	29.9535	29.2555	29.2066	29.6052	29.3634	28.3654	NaN	28.3066	28.7802
Q6RW13	Type-1 angiotensin II receptor-associated protein	AGTRAP	NaN	NaN	NaN	NaN	NaN	NaN	NaN	NaN	NaN	NaN	NaN	NaN	NaN	NaN	NaN	NaN	NaN	NaN	NaN	NaN	NaN	NaN	NaN	NaN	NaN	NaN	NaN	NaN	NaN	NaN	NaN	NaN	NaN	NaN	NaN	NaN	NaN	NaN	NaN	NaN	NaN	NaN	NaN	NaN	NaN	NaN	NaN
P23526	Adenosylhomocysteinase	AHCY	26.1994	26.611	24.8045	25.2584	NaN	NaN	NaN	NaN	NaN	NaN	NaN	NaN	25.6035	NaN	25.9461	24.7495	NaN	25.0805	NaN	NaN	NaN	NaN	25.3131	24.995	25.6328	NaN	NaN	NaN	NaN	NaN	NaN	NaN	NaN	25.373	23.8305	NaN	NaN	NaN	NaN	NaN	NaN	NaN	NaN	NaN	25.4663	25.4877	NaN
Q96HN2;O43865	Putative adenosylhomocysteinase 3;Putative adenosylhomocysteinase 2	AHCYL2;AHCYL1	NaN	23.3757	NaN	NaN	24.5757	NaN	24.3715	NaN	NaN	NaN	NaN	NaN	NaN	NaN	NaN	NaN	NaN	NaN	NaN	NaN	NaN	NaN	NaN	NaN	NaN	NaN	NaN	NaN	NaN	NaN	NaN	NaN	24.9805	NaN	NaN	NaN	NaN	NaN	NaN	NaN	NaN	NaN	NaN	NaN	NaN	NaN	NaN
Q09666	Neuroblast differentiation-associated protein AHNAK	AHNAK	33.1495	33.6291	31.6772	33.6993	28.0953	29.4093	26.5265	27.4639	27.346	25.276	26.903	31.7283	32.6169	31.9799	32.5379	30.4436	28.4623	29.904	27.9487	28.5963	29.0443	30.3846	33.6444	30.6165	32.5471	30.8997	28.4993	27.0067	26.9167	26.2624	29.0577	24.0618	26.4693	33.7913	32.0877	29.9376	33.1856	29.4326	28.9504	27.803	28.96	26.792	29.0154	28.6224	29.8048	32.3255	30.3383
Q8IVF2	Protein AHNAK2	AHNAK2	26.1043	26.9838	NaN	27.5663	NaN	NaN	NaN	NaN	NaN	27.3356	NaN	NaN	NaN	NaN	NaN	NaN	NaN	NaN	NaN	NaN	NaN	NaN	27.3542	NaN	NaN	NaN	NaN	NaN	NaN	NaN	NaN	NaN	NaN	27.5125	NaN	NaN	NaN	NaN	NaN	NaN	NaN	27.6577	28.8456	NaN	NaN	NaN	NaN
O95433	Activator of 90 kDa heat shock protein ATPase homolog 1	AHSA1	NaN	25.2645	NaN	NaN	NaN	NaN	NaN	NaN	NaN	NaN	NaN	NaN	NaN	NaN	NaN	NaN	NaN	NaN	NaN	NaN	NaN	NaN	NaN	NaN	NaN	NaN	NaN	NaN	NaN	NaN	NaN	NaN	NaN	NaN	NaN	NaN	NaN	NaN	NaN	NaN	NaN	NaN	NaN	NaN	NaN	NaN	NaN
P02765	Alpha-2-HS-glycoprotein;Alpha-2-HS-glycoprotein chain A;Alpha-2-HS-glycoprotein chain B	AHSG	31.3148	31.526	31.4047	31.1193	32.5693	32.4121	33.2012	31.5676	32.1275	32.6538	33.725	28.7818	27.2465	28.0181	27.5495	NaN	26.1628	NaN	NaN	NaN	NaN	NaN	30.5492	31.1479	29.1138	30.714	32.7956	31.3126	33.9366	33.4476	32.3989	32.7718	33.3288	28.75	NaN	NaN	24.3159	26.3568	NaN	NaN	NaN	NaN	NaN	NaN	28.2094	29.6648	30.0219
Q9NZD4	Alpha-hemoglobin-stabilizing protein	AHSP	NaN	NaN	NaN	NaN	NaN	NaN	NaN	NaN	NaN	NaN	NaN	NaN	NaN	NaN	NaN	NaN	NaN	NaN	NaN	NaN	NaN	NaN	24.6003	NaN	NaN	NaN	NaN	NaN	NaN	NaN	NaN	NaN	NaN	NaN	NaN	NaN	NaN	NaN	NaN	NaN	NaN	NaN	NaN	NaN	NaN	NaN	NaN
Q96BJ3	Axin interactor, dorsalization-associated protein	AIDA	NaN	NaN	NaN	22.6062	NaN	NaN	NaN	NaN	NaN	NaN	NaN	NaN	NaN	NaN	NaN	NaN	NaN	NaN	NaN	NaN	NaN	NaN	NaN	NaN	NaN	NaN	NaN	NaN	NaN	NaN	NaN	NaN	NaN	NaN	NaN	NaN	NaN	NaN	NaN	NaN	NaN	NaN	NaN	NaN	NaN	NaN	NaN
P55008	Allograft inflammatory factor 1	AIF1	24.2495	24.0846	NaN	NaN	NaN	NaN	NaN	NaN	NaN	NaN	NaN	NaN	NaN	NaN	NaN	NaN	NaN	NaN	NaN	NaN	NaN	NaN	NaN	NaN	NaN	NaN	NaN	NaN	NaN	NaN	NaN	NaN	NaN	NaN	NaN	NaN	NaN	NaN	NaN	NaN	NaN	NaN	NaN	NaN	NaN	NaN	NaN
O95831	Apoptosis-inducing factor 1, mitochondrial	AIFM1	27.3936	26.9669	NaN	28.0745	NaN	NaN	NaN	NaN	NaN	NaN	NaN	NaN	NaN	NaN	NaN	NaN	NaN	NaN	NaN	27.4947	27.6364	NaN	25.2671	NaN	NaN	NaN	NaN	NaN	NaN	NaN	NaN	NaN	NaN	NaN	NaN	NaN	NaN	NaN	NaN	NaN	NaN	NaN	NaN	NaN	27.9209	26.0185	NaN
Q12904	Aminoacyl tRNA synthase complex-interacting multifunctional protein 1;Endothelial monocyte-activating polypeptide 2	AIMP1	NaN	24.029	NaN	25.5853	NaN	NaN	NaN	NaN	NaN	NaN	NaN	NaN	NaN	NaN	NaN	NaN	NaN	NaN	NaN	NaN	NaN	NaN	NaN	NaN	NaN	NaN	NaN	NaN	NaN	NaN	NaN	NaN	NaN	NaN	NaN	NaN	NaN	NaN	NaN	NaN	NaN	NaN	NaN	NaN	NaN	NaN	NaN
O00170	AH receptor-interacting protein	AIP	NaN	23.2559	NaN	NaN	NaN	NaN	NaN	NaN	NaN	NaN	NaN	NaN	NaN	NaN	NaN	NaN	NaN	NaN	NaN	NaN	NaN	NaN	NaN	NaN	NaN	NaN	NaN	NaN	NaN	NaN	NaN	NaN	NaN	NaN	NaN	NaN	NaN	NaN	NaN	NaN	NaN	NaN	NaN	NaN	NaN	NaN	NaN
P00568	Adenylate kinase isoenzyme 1	AK1	30.9845	28.8649	26.7859	30.2013	26.5618	27.029	26.2193	26.6007	NaN	26.0286	NaN	28.2185	28.6728	28.2339	29.0329	27.7907	28.4425	27.276	27.6619	27.4656	27.5137	28.4397	28.5048	28.2574	29.0999	28.2286	28.0016	26.1902	26.6415	28.147	26.9029	26.1405	26.508	29.4092	27.8325	28.06	28.6194	28.3082	28.1382	25.1841	27.617	26.4093	26.4529	25.4054	29.0398	28.6881	28.2284
P54819	Adenylate kinase 2, mitochondrial;Adenylate kinase 2, mitochondrial, N-terminally processed	AK2	26.8872	26.6339	NaN	27.4815	NaN	NaN	NaN	NaN	NaN	NaN	NaN	NaN	24.936	NaN	NaN	NaN	25.2986	27.2799	NaN	NaN	NaN	NaN	25.61	NaN	NaN	NaN	NaN	NaN	NaN	NaN	NaN	NaN	NaN	25.1002	25.0378	NaN	NaN	NaN	NaN	NaN	NaN	NaN	NaN	NaN	NaN	25.6641	NaN
Q9UIJ7	GTP:AMP phosphotransferase AK3, mitochondrial	AK3	27.0116	25.7987	NaN	28.1534	NaN	NaN	NaN	NaN	NaN	NaN	NaN	24.9718	NaN	NaN	NaN	NaN	NaN	NaN	NaN	NaN	NaN	NaN	NaN	NaN	NaN	NaN	NaN	NaN	NaN	NaN	NaN	24.7914	NaN	NaN	NaN	NaN	NaN	NaN	NaN	NaN	NaN	NaN	NaN	NaN	NaN	NaN	NaN
Q02952	A-kinase anchor protein 12	AKAP12	28.9544	29.1426	NaN	29.4259	25.1512	25.167	NaN	NaN	NaN	NaN	NaN	NaN	NaN	NaN	NaN	NaN	NaN	NaN	NaN	NaN	NaN	NaN	24.1114	NaN	NaN	NaN	NaN	NaN	NaN	27.443	26.6637	NaN	28.2681	25.9273	23.6067	NaN	23.7108	NaN	NaN	NaN	NaN	NaN	NaN	NaN	NaN	24.1571	25.6114
Q99996	A-kinase anchor protein 9	AKAP9	NaN	NaN	NaN	NaN	NaN	26.964	26.8898	26.2204	27.4492	NaN	NaN	NaN	NaN	NaN	NaN	NaN	NaN	NaN	NaN	NaN	NaN	NaN	NaN	26.6334	NaN	NaN	NaN	NaN	NaN	27.8625	NaN	NaN	NaN	NaN	NaN	NaN	NaN	NaN	NaN	NaN	NaN	NaN	NaN	NaN	27.945	28.1432	27.1402
P14550	Alcohol dehydrogenase [NADP(+)]	AKR1A1	29.1847	29.1771	27.0947	29.2207	25.6627	25.084	24.0506	NaN	26.0237	NaN	23.0322	27.2844	27.9696	28.3127	28.172	25.5165	25.2706	25.9153	24.0734	25.1053	NaN	26.3311	27.2743	26.4713	27.0087	25.9249	26.0348	27.6863	24.1971	NaN	25.6419	NaN	NaN	27.2474	26.4598	25.0954	25.721	26.2394	NaN	NaN	NaN	NaN	NaN	NaN	27.2707	27.5842	25.3939
P15121	Aldose reductase	AKR1B1	28.7033	26.869	24.3699	28.0951	NaN	23.3951	NaN	NaN	25.0106	NaN	22.6874	26.3369	25.4382	26.957	27.1784	22.9081	NaN	NaN	NaN	NaN	NaN	NaN	26.1944	NaN	24.7194	NaN	NaN	NaN	NaN	NaN	NaN	NaN	NaN	NaN	NaN	NaN	NaN	NaN	NaN	NaN	NaN	NaN	NaN	NaN	26.0483	25.3254	25.5364
Q04828;P52895	Aldo-keto reductase family 1 member C1;Aldo-keto reductase family 1 member C2	AKR1C1;AKR1C2	26.6573	26.73	NaN	26.7924	27.7962	NaN	NaN	NaN	NaN	NaN	NaN	NaN	27.6813	27.1932	26.9371	NaN	NaN	NaN	NaN	NaN	NaN	25.4713	26.4879	NaN	NaN	NaN	27.374	NaN	NaN	NaN	NaN	NaN	NaN	28.1281	27.7495	NaN	NaN	NaN	NaN	NaN	NaN	NaN	NaN	NaN	NaN	26.1551	NaN
P42330	Aldo-keto reductase family 1 member C3	AKR1C3	27.361	26.867	NaN	26.7033	NaN	NaN	NaN	NaN	NaN	NaN	NaN	NaN	NaN	NaN	NaN	NaN	NaN	NaN	NaN	NaN	NaN	NaN	27.3907	NaN	NaN	NaN	27.2119	NaN	26.5094	NaN	NaN	NaN	NaN	26.2687	NaN	NaN	NaN	NaN	NaN	NaN	24.6925	NaN	23.5195	NaN	NaN	NaN	NaN
O43488	Aflatoxin B1 aldehyde reductase member 2	AKR7A2	24.884	26.9111	NaN	25.8505	NaN	26.0968	NaN	NaN	NaN	NaN	23.9995	NaN	24.9775	NaN	23.9362	NaN	24.0956	26.2366	25.1915	NaN	NaN	25.7524	24.1681	NaN	25.3707	NaN	NaN	NaN	NaN	NaN	NaN	NaN	NaN	25.1336	NaN	NaN	NaN	NaN	NaN	25.698	NaN	23.1962	NaN	26.5006	NaN	NaN	NaN
P13716	Delta-aminolevulinic acid dehydratase	ALAD	NaN	NaN	NaN	NaN	NaN	NaN	NaN	NaN	NaN	NaN	NaN	NaN	NaN	NaN	NaN	NaN	NaN	NaN	NaN	NaN	NaN	NaN	24.4454	NaN	NaN	NaN	NaN	NaN	NaN	NaN	NaN	NaN	NaN	NaN	NaN	NaN	NaN	NaN	NaN	NaN	NaN	NaN	NaN	NaN	NaN	NaN	NaN
CON__P02768-1;P02768	Serum albumin	ALB	39.6298	39.3375	39.1115	38.8541	40.5834	39.9186	40.8281	39.2402	39.7744	40.097	41.0138	39.1941	37.1708	36.0525	36.1122	34.0253	33.3029	33.3528	33.7274	33.2932	32.9447	33.3675	38.937	39.5565	38.9991	38.282	40.515	39.4899	40.5704	40.7008	39.3156	39.644	39.9989	37.0942	36.3792	33.7309	36.5009	34.9191	33.9608	34.4449	34.468	34.7209	34.4191	34.612	36.4418	38.0644	36.624
P54886	Delta-1-pyrroline-5-carboxylate synthase;Glutamate 5-kinase;Gamma-glutamyl phosphate reductase	ALDH18A1	25.1567	25.6331	NaN	NaN	NaN	NaN	NaN	NaN	NaN	NaN	NaN	NaN	NaN	NaN	NaN	NaN	NaN	NaN	NaN	NaN	NaN	NaN	NaN	NaN	NaN	NaN	NaN	NaN	NaN	NaN	NaN	NaN	NaN	NaN	NaN	NaN	NaN	NaN	NaN	NaN	NaN	NaN	NaN	NaN	NaN	NaN	NaN
P00352	Retinal dehydrogenase 1	ALDH1A1	29.9643	28.0288	25.7987	29.8562	23.5082	23.3051	NaN	NaN	NaN	NaN	22.5309	NaN	24.4181	NaN	26.2155	23.851	NaN	22.2147	NaN	NaN	NaN	NaN	24.5999	24.1647	27.1615	23.3316	23.3964	NaN	23.116	NaN	26.1792	26.2351	24.5222	26.1551	24.7551	24.4647	NaN	NaN	NaN	NaN	NaN	NaN	NaN	NaN	23.6146	23.0421	NaN
P30837	Aldehyde dehydrogenase X, mitochondrial	ALDH1B1	25.5961	24.8713	NaN	26.0604	NaN	NaN	NaN	NaN	NaN	NaN	NaN	NaN	NaN	NaN	NaN	NaN	NaN	NaN	NaN	NaN	NaN	NaN	NaN	NaN	NaN	NaN	NaN	NaN	NaN	NaN	NaN	NaN	NaN	NaN	NaN	NaN	NaN	NaN	NaN	NaN	NaN	NaN	NaN	NaN	NaN	NaN	NaN
O75891	Cytosolic 10-formyltetrahydrofolate dehydrogenase	ALDH1L1	20.7471	NaN	NaN	NaN	NaN	NaN	NaN	NaN	NaN	NaN	NaN	NaN	NaN	NaN	NaN	NaN	NaN	NaN	NaN	NaN	NaN	NaN	NaN	NaN	NaN	NaN	NaN	NaN	NaN	NaN	NaN	NaN	NaN	NaN	NaN	NaN	NaN	NaN	NaN	NaN	NaN	NaN	NaN	NaN	NaN	NaN	NaN
Q3SY69	Mitochondrial 10-formyltetrahydrofolate dehydrogenase	ALDH1L2	NaN	NaN	NaN	23.8764	NaN	NaN	NaN	NaN	NaN	NaN	NaN	NaN	NaN	NaN	NaN	NaN	NaN	NaN	NaN	NaN	NaN	NaN	NaN	NaN	NaN	NaN	NaN	NaN	NaN	NaN	NaN	NaN	NaN	NaN	NaN	NaN	NaN	NaN	NaN	NaN	NaN	NaN	NaN	NaN	NaN	28.569	NaN
P05091	Aldehyde dehydrogenase, mitochondrial	ALDH2	27.71	27.592	NaN	27.4956	NaN	NaN	NaN	NaN	NaN	23.3164	NaN	24.2372	26.0252	NaN	NaN	NaN	NaN	NaN	NaN	NaN	NaN	NaN	25.1461	NaN	NaN	NaN	NaN	NaN	NaN	NaN	NaN	NaN	NaN	26.2035	NaN	NaN	26.3751	NaN	NaN	NaN	NaN	NaN	NaN	NaN	NaN	NaN	NaN
P30038	Delta-1-pyrroline-5-carboxylate dehydrogenase, mitochondrial	ALDH4A1	24.9568	NaN	NaN	25.5145	NaN	NaN	NaN	NaN	NaN	NaN	NaN	NaN	NaN	NaN	NaN	NaN	NaN	NaN	NaN	NaN	NaN	NaN	NaN	NaN	NaN	NaN	NaN	NaN	NaN	NaN	NaN	NaN	NaN	NaN	NaN	NaN	NaN	NaN	NaN	NaN	NaN	NaN	NaN	NaN	NaN	NaN	NaN
P51649	Succinate-semialdehyde dehydrogenase, mitochondrial	ALDH5A1	NaN	NaN	NaN	NaN	NaN	NaN	NaN	NaN	NaN	NaN	NaN	NaN	NaN	NaN	NaN	NaN	NaN	NaN	NaN	NaN	NaN	NaN	NaN	NaN	NaN	NaN	NaN	NaN	NaN	NaN	NaN	NaN	NaN	NaN	NaN	NaN	23.9271	NaN	NaN	NaN	NaN	NaN	NaN	NaN	NaN	NaN	NaN
Q02252	Methylmalonate-semialdehyde dehydrogenase [acylating], mitochondrial	ALDH6A1	24.3464	23.6446	NaN	24.48	NaN	NaN	NaN	NaN	NaN	NaN	NaN	22.7589	NaN	NaN	NaN	NaN	NaN	NaN	NaN	NaN	NaN	23.3681	NaN	NaN	NaN	NaN	NaN	NaN	NaN	NaN	NaN	NaN	NaN	NaN	NaN	NaN	NaN	NaN	NaN	NaN	NaN	NaN	NaN	NaN	NaN	NaN	NaN
P49419	Alpha-aminoadipic semialdehyde dehydrogenase	ALDH7A1	24.8406	24.9874	NaN	25.2652	NaN	NaN	NaN	NaN	NaN	NaN	NaN	NaN	NaN	NaN	NaN	NaN	NaN	NaN	NaN	NaN	NaN	NaN	NaN	NaN	NaN	NaN	NaN	NaN	NaN	NaN	NaN	NaN	NaN	NaN	NaN	NaN	NaN	NaN	NaN	NaN	NaN	NaN	NaN	NaN	NaN	NaN	NaN
P49189	4-trimethylaminobutyraldehyde dehydrogenase	ALDH9A1	27.9013	27.4126	25.2333	27.642	28.1167	27.7114	25.2416	NaN	27.4787	NaN	NaN	26.0096	27.2069	26.0195	26.5951	26.0139	NaN	26.4228	29.2186	27.8319	28.0081	27.5274	26.2012	27.1365	26.4935	28.3026	27.7267	NaN	NaN	NaN	28.3049	NaN	NaN	27.5366	26.3284	27.8781	27.235	NaN	NaN	NaN	26.5409	26.1665	28.1546	NaN	28.4702	27.2933	28.0295
P04075	Fructose-bisphosphate aldolase A	ALDOA	33.4845	31.1936	29.1589	34.2386	29.4078	28.8433	27.8227	28.196	27.5023	25.9839	27.4042	30.9115	31.7823	30.993	32.7059	29.7808	31.0648	30.5011	30.2919	30.5001	29.7686	31.7263	30.9809	29.2375	28.2651	29.3999	28.5447	27.9505	28.1043	28.7228	29.0884	25.9303	27.9742	31.7913	30.7369	30.8581	31.6515	30.9162	30.5319	30.6591	28.8565	30.5311	29.4211	29.6718	30.1696	29.7879	29.4605
P05062	Fructose-bisphosphate aldolase B	ALDOB	NaN	NaN	24.9529	NaN	25.6673	NaN	24.1507	NaN	24.4745	NaN	NaN	NaN	NaN	NaN	NaN	NaN	NaN	NaN	NaN	NaN	NaN	NaN	NaN	NaN	NaN	NaN	NaN	NaN	NaN	NaN	NaN	NaN	NaN	NaN	NaN	NaN	NaN	NaN	NaN	NaN	NaN	NaN	NaN	NaN	NaN	NaN	NaN
P09972	Fructose-bisphosphate aldolase C	ALDOC	29.8546	28.7123	26.7077	30.7266	26.0922	26.5736	NaN	NaN	NaN	NaN	NaN	28.0277	28.7387	28.7967	29.3117	28.2271	28.5389	29.2757	28.5498	29.0367	28.0968	28.31	28.144	26.8469	27.1905	NaN	NaN	NaN	24.0099	NaN	26.5649	NaN	NaN	30.0518	28.176	28.2446	30.0544	28.4919	NaN	28.7523	28.8741	28.7175	28.0216	27.9672	28.4935	27.6684	27.4914
Q86V81	THO complex subunit 4	ALYREF	23.4929	NaN	NaN	NaN	NaN	NaN	NaN	NaN	NaN	NaN	NaN	NaN	24.2631	NaN	NaN	NaN	NaN	NaN	NaN	NaN	NaN	NaN	24.6008	NaN	NaN	NaN	NaN	NaN	NaN	NaN	NaN	NaN	NaN	NaN	NaN	NaN	NaN	NaN	NaN	NaN	NaN	NaN	NaN	NaN	NaN	NaN	23.6085
P02760	Protein AMBP;Alpha-1-microglobulin;Inter-alpha-trypsin inhibitor light chain;Trypstatin	AMBP	31.4247	32.0164	33.6093	31.0464	32.6311	32.8854	32.0882	32.9476	33.1249	32.0648	32.3674	31.0742	31.9324	30.5427	31.8385	24.6114	24.8009	NaN	NaN	NaN	NaN	NaN	30.3851	31.2794	32.3578	30.4485	29.9694	30.0574	31.4364	30.5756	33.1093	30.425	32.2076	31.2602	31.4943	27.8816	31.8289	26.438	25.7773	25.3096	NaN	NaN	25.6527	25.7671	28.7391	30.9519	31.6574
P23109	AMP deaminase 1	AMPD1	25.0697	NaN	NaN	26.4765	NaN	NaN	NaN	NaN	NaN	NaN	NaN	NaN	NaN	NaN	24.1363	NaN	NaN	NaN	NaN	NaN	NaN	NaN	NaN	NaN	NaN	NaN	NaN	NaN	NaN	NaN	NaN	NaN	NaN	NaN	NaN	NaN	NaN	NaN	NaN	NaN	NaN	NaN	NaN	NaN	NaN	NaN	NaN
P49418	Amphiphysin	AMPH	NaN	24.0632	NaN	NaN	NaN	NaN	NaN	NaN	NaN	NaN	NaN	NaN	NaN	NaN	NaN	NaN	NaN	NaN	NaN	NaN	NaN	NaN	NaN	NaN	NaN	NaN	NaN	NaN	NaN	NaN	NaN	NaN	NaN	NaN	NaN	NaN	NaN	NaN	NaN	NaN	NaN	NaN	NaN	NaN	NaN	NaN	NaN
P03950	Angiogenin	ANG	30.1605	28.7046	30.5989	28.1374	33.5141	32.4145	31.3618	31.1042	31.4151	31.9828	31.2975	33.5641	33.557	33.7417	32.7985	35.1178	35.2654	34.965	34.4344	34.3427	34.4831	34.6114	32.8792	33.0891	32.0193	32.6039	33.783	33.5858	31.9484	31.7993	30.8584	31.9179	30.2655	32.0185	34.1813	33.5053	32.5196	34.2703	32.3043	33.8638	34.2593	33.4931	32.1393	33.9795	34.4415	33.2344	32.886
O95841	Angiopoietin-related protein 1	ANGPTL1	NaN	NaN	NaN	NaN	NaN	NaN	NaN	NaN	NaN	NaN	NaN	NaN	NaN	NaN	NaN	NaN	NaN	24.4196	NaN	NaN	NaN	NaN	23.9767	NaN	NaN	NaN	NaN	NaN	NaN	NaN	NaN	NaN	NaN	NaN	NaN	NaN	NaN	NaN	NaN	NaN	NaN	NaN	NaN	NaN	NaN	NaN	NaN
Q9UKU9	Angiopoietin-related protein 2	ANGPTL2	30.0087	30.4245	31.0681	28.7808	30.5421	31.4667	30.6935	31.1601	30.7041	31.2975	30.6315	30.3236	30.4818	29.9806	30.096	30.8845	29.964	30.6111	30.2993	30.0213	30.7749	30.965	31.4933	31.8275	30.9926	32.063	31.8115	31.7484	30.861	31.2409	30.7146	31.0274	30.9882	29.6144	30.4731	29.3707	29.9698	29.9851	29.9364	30.9015	30.7334	30.1269	30.6039	30.4023	31.7241	31.4654	31.7595
Q9Y5C1	Angiopoietin-related protein 3	ANGPTL3	NaN	NaN	25.0531	NaN	24.4536	24.7461	NaN	NaN	NaN	NaN	NaN	NaN	NaN	NaN	NaN	NaN	NaN	NaN	NaN	NaN	NaN	NaN	NaN	NaN	NaN	NaN	NaN	NaN	NaN	NaN	26.1525	NaN	NaN	NaN	NaN	NaN	NaN	NaN	NaN	NaN	NaN	NaN	NaN	NaN	NaN	NaN	24.9702
Q9BY76	Angiopoietin-related protein 4	ANGPTL4	24.8155	25.5188	26.0436	NaN	29.0186	29.0216	27.9399	29.0438	27.4633	27.7871	28.5433	26.576	NaN	NaN	NaN	25.8814	NaN	NaN	NaN	NaN	NaN	NaN	25.1701	26.5796	26.1396	NaN	25.9729	NaN	28.2345	27.2927	28.405	26.2513	29.1234	NaN	25.2006	NaN	NaN	NaN	NaN	NaN	NaN	NaN	NaN	NaN	26.2983	26.2047	26.6952
Q86XS5	Angiopoietin-related protein 5	ANGPTL5	25.7449	25.3448	NaN	24.4449	26.484	25.5502	NaN	NaN	NaN	NaN	23.9151	25.854	25.1201	27.7189	27.921	NaN	25.9867	NaN	26.0897	25.1275	NaN	25.67	26.3763	26.5349	NaN	26.8364	26.793	26.1528	NaN	24.8288	NaN	NaN	NaN	NaN	26.2993	NaN	NaN	25.8199	NaN	NaN	26.2405	NaN	NaN	NaN	25.9135	26.1495	24.5556
O43827	Angiopoietin-related protein 7	ANGPTL7	27.543	25.9155	25.4101	27.0378	25.3168	27.1405	24.6275	NaN	NaN	26.4192	25.2393	24.9327	NaN	NaN	27.4661	NaN	NaN	NaN	NaN	NaN	26.9289	NaN	26.5621	26.2931	NaN	27.0687	24.7953	NaN	NaN	23.5914	NaN	NaN	NaN	29.1723	NaN	NaN	27.4013	NaN	NaN	NaN	NaN	NaN	NaN	NaN	29.4741	27.5307	27.5203
P16157	Ankyrin-1	ANK1	NaN	NaN	NaN	NaN	NaN	NaN	NaN	NaN	NaN	NaN	NaN	NaN	NaN	NaN	NaN	NaN	NaN	NaN	NaN	NaN	NaN	NaN	NaN	NaN	NaN	NaN	NaN	NaN	NaN	NaN	NaN	NaN	NaN	NaN	NaN	NaN	NaN	NaN	NaN	NaN	NaN	NaN	NaN	NaN	NaN	NaN	NaN
Q01484	Ankyrin-2	ANK2	24.6293	24.9029	NaN	25.2822	NaN	NaN	NaN	NaN	NaN	NaN	NaN	NaN	NaN	NaN	NaN	NaN	NaN	NaN	NaN	NaN	NaN	NaN	NaN	NaN	NaN	NaN	NaN	NaN	NaN	NaN	NaN	NaN	NaN	NaN	NaN	NaN	NaN	NaN	NaN	NaN	NaN	NaN	NaN	NaN	NaN	NaN	NaN
Q12955	Ankyrin-3	ANK3	NaN	NaN	NaN	NaN	NaN	NaN	NaN	NaN	NaN	NaN	NaN	NaN	NaN	NaN	NaN	NaN	NaN	NaN	NaN	NaN	NaN	NaN	NaN	NaN	NaN	NaN	NaN	NaN	NaN	NaN	NaN	NaN	NaN	NaN	NaN	NaN	NaN	NaN	NaN	NaN	NaN	NaN	NaN	NaN	NaN	NaN	NaN
Q15327	Ankyrin repeat domain-containing protein 1	ANKRD1	NaN	NaN	NaN	NaN	NaN	NaN	NaN	NaN	NaN	NaN	NaN	NaN	NaN	NaN	NaN	NaN	NaN	NaN	NaN	NaN	NaN	NaN	NaN	NaN	NaN	NaN	NaN	NaN	NaN	NaN	NaN	NaN	NaN	NaN	NaN	NaN	NaN	NaN	NaN	NaN	NaN	NaN	NaN	NaN	NaN	NaN	NaN
Q9GZV1	Ankyrin repeat domain-containing protein 2	ANKRD2	28.977	NaN	25.5251	29.9802	25.32	NaN	NaN	NaN	NaN	NaN	NaN	NaN	NaN	NaN	NaN	NaN	NaN	NaN	NaN	NaN	NaN	NaN	NaN	NaN	NaN	NaN	NaN	NaN	NaN	NaN	NaN	NaN	NaN	24.984	NaN	27.5879	26.34	NaN	NaN	25.7049	NaN	NaN	27.1358	NaN	NaN	NaN	NaN
P39687	Acidic leucine-rich nuclear phosphoprotein 32 family member A	ANP32A	27.6002	27.7208	NaN	28.5011	24.5824	NaN	NaN	NaN	NaN	NaN	NaN	25.8625	26.2461	26.145	NaN	NaN	25.8813	NaN	NaN	NaN	NaN	NaN	27.4367	25.4696	NaN	NaN	NaN	NaN	NaN	NaN	NaN	NaN	NaN	26.5841	NaN	NaN	NaN	NaN	NaN	NaN	NaN	27.8264	NaN	NaN	NaN	NaN	NaN
Q92688	Acidic leucine-rich nuclear phosphoprotein 32 family member B	ANP32B	NaN	NaN	NaN	NaN	NaN	NaN	NaN	NaN	NaN	NaN	NaN	NaN	NaN	NaN	NaN	NaN	NaN	NaN	NaN	NaN	NaN	NaN	NaN	NaN	NaN	NaN	NaN	NaN	NaN	NaN	NaN	NaN	NaN	NaN	NaN	NaN	NaN	NaN	NaN	NaN	NaN	NaN	NaN	NaN	NaN	NaN	NaN
Q9BTT0	Acidic leucine-rich nuclear phosphoprotein 32 family member E	ANP32E	NaN	NaN	NaN	NaN	NaN	NaN	NaN	NaN	NaN	NaN	NaN	NaN	NaN	NaN	NaN	NaN	NaN	NaN	NaN	NaN	NaN	NaN	NaN	NaN	NaN	NaN	NaN	NaN	NaN	NaN	NaN	NaN	NaN	NaN	NaN	NaN	NaN	NaN	NaN	NaN	NaN	NaN	NaN	NaN	NaN	NaN	NaN
P15144	Aminopeptidase N	ANPEP	26.6176	28.3073	26.1475	27.0002	26.4552	26.1775	24.8139	26.9002	26.4892	25.3668	26.1635	24.2194	NaN	NaN	NaN	NaN	NaN	NaN	NaN	NaN	NaN	NaN	26.2691	25.5886	27.0205	24.9711	NaN	NaN	26.1555	25.2485	25.9604	25.4283	27.119	NaN	NaN	NaN	NaN	NaN	NaN	NaN	NaN	NaN	NaN	NaN	NaN	NaN	NaN
P58335	Anthrax toxin receptor 2	ANTXR2	NaN	NaN	NaN	NaN	NaN	NaN	NaN	NaN	NaN	NaN	NaN	NaN	NaN	NaN	NaN	NaN	NaN	NaN	NaN	NaN	NaN	NaN	NaN	NaN	NaN	NaN	NaN	NaN	NaN	NaN	22.1953	NaN	NaN	NaN	NaN	NaN	NaN	NaN	NaN	NaN	NaN	NaN	NaN	NaN	NaN	NaN	NaN
P04083	Annexin A1	ANXA1	32.4412	32.8044	31.2206	32.7317	30.7455	30.8662	29.7058	30.3264	29.9054	30.2204	29.3008	33.2766	33.402	33.4871	33.4756	33.6063	32.6444	33.0463	32.1327	32.2668	32.6101	33.1851	32.3729	31.6307	32.4171	32.0787	31.4686	30.9609	29.8906	30.3479	30.2961	30.9304	30.1213	33.4985	33.2511	33.8342	33.8407	33.1926	32.8899	32.6487	32.0446	32.0497	32.1498	32.2955	32.6014	32.2781	32.0231
P50995	Annexin A11	ANXA11	29.1314	28.9598	25.294	29.1803	27.3009	26.1132	25.0763	NaN	NaN	NaN	NaN	28.4444	27.4632	26.7995	28.0204	27.4189	25.5083	26.3866	NaN	NaN	26.375	27.0125	28.7276	27.8072	28.5694	28.7832	28.0005	NaN	27.2058	26.8171	26.1664	26.6232	26.0338	27.3915	28.308	28.4724	NaN	27.1821	27.6705	NaN	NaN	NaN	25.1339	NaN	25.61	28.5538	26.1787
P07355;A6NMY6	Annexin A2;Putative annexin A2-like protein	ANXA2;ANXA2P2	34.4219	34.4633	31.894	34.7172	31.3779	31.7242	29.8118	31.0705	30.5023	30.5663	29.7703	33.5843	34.2568	33.9622	34.0467	33.5906	33.1036	33.5116	32.7432	33.117	33.4068	33.8028	33.9299	32.6266	32.7575	32.8239	31.8694	30.8786	30.2616	31.0264	30.8186	31.2363	30.6206	34.5595	34.1356	33.6578	34.3057	33.7997	33.3294	33.0352	33.3081	32.7906	33.1499	32.9668	33.0146	33.8442	32.6055
P12429	Annexin A3	ANXA3	NaN	NaN	NaN	23.7042	NaN	NaN	NaN	NaN	NaN	NaN	NaN	NaN	NaN	NaN	NaN	NaN	NaN	NaN	NaN	NaN	NaN	NaN	NaN	NaN	NaN	NaN	NaN	24.7644	NaN	NaN	NaN	NaN	NaN	NaN	NaN	NaN	NaN	NaN	NaN	NaN	NaN	NaN	NaN	NaN	24.799	NaN	NaN
P09525	Annexin A4	ANXA4	30.52	31.1347	29.749	31.1103	30.5083	28.6407	27.4594	28.3077	28.3361	28.4601	26.3394	31.8392	32.3956	32.6592	32.3585	31.5066	31.1417	31.4161	30.8702	30.5935	31.2769	31.7645	31.2638	30.2071	30.6498	31.0115	29.6616	29.8599	27.3573	27.0766	29.2533	28.3123	26.7221	32.2033	32.1081	32.6001	32.4412	31.9664	31.7947	30.653	30.3678	30.0331	30.6611	30.1328	30.9948	31.3985	30.6371
P08758	Annexin A5	ANXA5	31.7532	32.7029	31.2126	31.4297	31.0809	31.0775	29.9222	30.2753	29.8361	30.7618	29.7563	32.787	33.4035	33.8905	33.2265	32.1771	31.6209	32.0377	31.5525	31.5595	31.1523	31.6033	32.37	32.0142	32.3311	32.458	31.4526	31.0267	30.1594	31.2804	30.5167	30.7235	30.1914	33.1155	33.1838	33.2591	33.4337	32.4346	31.8911	31.4187	31.8148	32.1117	32.5542	30.7978	32.2202	32.5737	31.6114
P08133	Annexin A6	ANXA6	31.2442	30.9791	28.7632	31.3381	28.5046	28.2706	26.6697	27.8437	26.7009	26.7409	26.8107	30.642	30.7417	31.1616	31.0161	29.3529	29.6415	29.4801	28.9595	29.1547	28.7253	29.6954	30.3688	29.8464	30.2121	30.0517	28.761	27.0609	27.1886	27.7718	27.8857	27.9961	26.302	30.9852	30.454	30.908	31.4627	30.43	30.1532	28.416	28.1777	28.8901	29.08	27.8494	30.5162	30.7059	29.8276
P20073	Annexin A7	ANXA7	25.8937	25.7763	25.2266	NaN	NaN	NaN	NaN	NaN	25.5454	NaN	NaN	26.7037	26.3533	26.9803	25.7709	25.6531	25.133	25.5381	NaN	NaN	NaN	26.2971	25.8275	NaN	NaN	NaN	24.8931	NaN	NaN	NaN	NaN	NaN	NaN	26.483	26.9326	26.6777	26.213	25.7598	26.0626	NaN	NaN	NaN	NaN	NaN	NaN	25.8213	24.9206
Q5VT79;P13928	Annexin A8-like protein 2;Annexin A8	ANXA8L2;ANXA8	NaN	NaN	NaN	NaN	NaN	NaN	NaN	NaN	NaN	NaN	NaN	NaN	NaN	NaN	NaN	NaN	NaN	NaN	NaN	NaN	NaN	24.7996	NaN	NaN	NaN	NaN	NaN	NaN	NaN	NaN	NaN	NaN	NaN	NaN	NaN	NaN	NaN	NaN	NaN	NaN	NaN	NaN	NaN	NaN	NaN	NaN	NaN
O75106	Retina-specific copper amine oxidase	AOC2	NaN	23.4964	NaN	24.1028	26.0395	NaN	NaN	NaN	NaN	NaN	24.4539	28.581	30.239	29.8671	29.5044	25.9506	24.8344	25.6074	NaN	24.4216	25.1019	26.1052	26.1406	26.4518	NaN	NaN	NaN	26.6706	24.4431	25.5318	24.8159	NaN	24.8703	28.0679	27.6319	29.039	28.616	25.8563	26.5841	NaN	26.4763	24.8743	25.5461	23.6985	NaN	NaN	NaN
Q16853	Membrane primary amine oxidase	AOC3	28.4261	25.3631	NaN	28.2403	23.2751	NaN	NaN	NaN	NaN	NaN	NaN	NaN	24.7893	NaN	NaN	NaN	NaN	NaN	NaN	NaN	25.0683	NaN	25.5604	NaN	NaN	NaN	NaN	NaN	NaN	NaN	NaN	NaN	NaN	NaN	NaN	NaN	NaN	NaN	NaN	NaN	NaN	NaN	NaN	NaN	NaN	NaN	NaN
Q06278	Aldehyde oxidase	AOX1	24.7147	NaN	NaN	24.2945	NaN	NaN	NaN	NaN	NaN	NaN	NaN	NaN	NaN	NaN	NaN	NaN	NaN	NaN	NaN	NaN	NaN	NaN	NaN	NaN	NaN	NaN	NaN	NaN	NaN	NaN	NaN	NaN	NaN	NaN	NaN	NaN	NaN	NaN	NaN	NaN	NaN	NaN	NaN	NaN	NaN	NaN	NaN
Q10567	AP-1 complex subunit beta-1	AP1B1	27.7281	27.2746	24.5671	26.0538	24.0241	NaN	NaN	26.7761	26.7594	24.0518	NaN	24.7396	25.5593	NaN	NaN	NaN	NaN	NaN	NaN	NaN	NaN	NaN	25.5575	NaN	25.9377	NaN	NaN	NaN	25.5596	NaN	NaN	NaN	NaN	24.4882	NaN	NaN	25.4054	NaN	NaN	NaN	NaN	NaN	NaN	NaN	NaN	NaN	NaN
Q9BXS5	AP-1 complex subunit mu-1	AP1M1	22.6565	NaN	NaN	NaN	NaN	NaN	NaN	NaN	NaN	NaN	NaN	NaN	NaN	NaN	NaN	NaN	NaN	NaN	NaN	NaN	NaN	NaN	NaN	NaN	NaN	NaN	NaN	NaN	NaN	NaN	NaN	NaN	NaN	NaN	NaN	NaN	NaN	NaN	NaN	NaN	NaN	NaN	NaN	NaN	NaN	NaN	NaN
O95782	AP-2 complex subunit alpha-1	AP2A1	24.202	25.2864	NaN	24.2125	NaN	NaN	NaN	NaN	NaN	NaN	NaN	24.6513	NaN	NaN	NaN	NaN	NaN	NaN	NaN	NaN	NaN	NaN	23.2141	NaN	NaN	NaN	NaN	NaN	NaN	NaN	NaN	NaN	NaN	NaN	23.4319	NaN	NaN	NaN	NaN	NaN	NaN	NaN	NaN	NaN	NaN	NaN	NaN
O94973	AP-2 complex subunit alpha-2	AP2A2	25.5299	27.5426	NaN	24.5266	23.855	23.7659	NaN	23.1939	NaN	NaN	23.3809	24	24.3333	NaN	NaN	23.3893	NaN	NaN	NaN	NaN	NaN	NaN	24.9651	NaN	NaN	NaN	23.2282	NaN	24.1603	NaN	NaN	NaN	NaN	NaN	NaN	NaN	25.1498	NaN	NaN	NaN	NaN	NaN	NaN	NaN	NaN	23.517	NaN
P63010	AP-2 complex subunit beta	AP2B1	25.1411	25.0912	NaN	23.5988	NaN	NaN	NaN	NaN	NaN	NaN	NaN	NaN	NaN	NaN	NaN	NaN	NaN	NaN	NaN	NaN	NaN	NaN	NaN	NaN	NaN	NaN	NaN	NaN	NaN	NaN	NaN	NaN	NaN	NaN	NaN	NaN	NaN	NaN	NaN	NaN	NaN	NaN	NaN	NaN	NaN	NaN	NaN
Q96CW1	AP-2 complex subunit mu	AP2M1	24.822	25.5351	NaN	25.0513	NaN	NaN	NaN	NaN	NaN	NaN	NaN	NaN	NaN	NaN	NaN	NaN	NaN	NaN	NaN	NaN	NaN	NaN	NaN	NaN	NaN	NaN	NaN	NaN	NaN	NaN	NaN	NaN	NaN	NaN	NaN	NaN	NaN	NaN	NaN	NaN	NaN	NaN	NaN	NaN	NaN	NaN	NaN
P53680	AP-2 complex subunit sigma	AP2S1	23.0472	23.6343	NaN	NaN	NaN	NaN	NaN	NaN	NaN	NaN	NaN	NaN	NaN	NaN	NaN	NaN	NaN	NaN	NaN	NaN	NaN	NaN	NaN	NaN	NaN	NaN	NaN	NaN	NaN	NaN	NaN	NaN	NaN	NaN	NaN	NaN	NaN	NaN	NaN	NaN	NaN	NaN	NaN	NaN	NaN	NaN	NaN
O00203	AP-3 complex subunit beta-1	AP3B1	NaN	23.8842	NaN	NaN	NaN	NaN	NaN	NaN	26.0281	NaN	NaN	NaN	NaN	NaN	NaN	NaN	NaN	NaN	NaN	NaN	NaN	NaN	NaN	NaN	NaN	NaN	NaN	NaN	NaN	NaN	NaN	NaN	NaN	NaN	NaN	NaN	NaN	NaN	NaN	NaN	NaN	NaN	NaN	NaN	NaN	NaN	NaN
O14617	AP-3 complex subunit delta-1	AP3D1	NaN	23.9818	NaN	NaN	NaN	NaN	NaN	NaN	NaN	NaN	NaN	NaN	NaN	NaN	NaN	NaN	NaN	NaN	NaN	NaN	NaN	NaN	NaN	NaN	NaN	NaN	NaN	NaN	NaN	NaN	NaN	NaN	NaN	NaN	NaN	NaN	NaN	NaN	NaN	NaN	NaN	NaN	NaN	NaN	NaN	NaN	NaN
Q9Y2T2	AP-3 complex subunit mu-1	AP3M1	NaN	22.7248	NaN	NaN	NaN	NaN	NaN	NaN	NaN	NaN	NaN	NaN	NaN	NaN	NaN	NaN	NaN	NaN	NaN	NaN	NaN	NaN	NaN	NaN	NaN	NaN	NaN	NaN	NaN	NaN	NaN	NaN	NaN	NaN	NaN	NaN	NaN	NaN	NaN	NaN	NaN	NaN	NaN	NaN	NaN	NaN	NaN
Q92572	AP-3 complex subunit sigma-1	AP3S1	NaN	22.1056	NaN	NaN	NaN	NaN	NaN	NaN	NaN	NaN	NaN	NaN	NaN	NaN	NaN	NaN	NaN	NaN	NaN	NaN	NaN	NaN	NaN	NaN	NaN	NaN	NaN	NaN	NaN	NaN	NaN	NaN	NaN	NaN	NaN	NaN	NaN	NaN	NaN	NaN	NaN	NaN	NaN	NaN	NaN	NaN	NaN
P02743	Serum amyloid P-component;Serum amyloid P-component(1-203)	APCS	32.1779	33.4132	35.8164	30.2768	33.7653	34.4777	32.6024	34.3167	33.7045	33.1555	33.9653	31.9332	28.4296	NaN	27.5509	NaN	NaN	NaN	NaN	NaN	NaN	NaN	32.364	33.5034	34.4163	34.1332	32.2118	31.8646	32.7128	32.6115	34.5622	32.2609	33.6799	29.2255	28.6125	NaN	29.9471	NaN	NaN	NaN	NaN	NaN	NaN	28.2411	28.5796	32.0567	33.5498
P13798	Acylamino-acid-releasing enzyme	APEH	24.7856	25.0786	NaN	NaN	NaN	NaN	NaN	NaN	NaN	NaN	25.3886	NaN	NaN	NaN	NaN	23.942	NaN	NaN	NaN	NaN	NaN	NaN	NaN	NaN	NaN	NaN	NaN	NaN	NaN	NaN	NaN	NaN	NaN	NaN	NaN	NaN	NaN	NaN	NaN	NaN	NaN	NaN	NaN	NaN	NaN	25.2159	NaN
P27695	DNA-(apurinic or apyrimidinic site) lyase;DNA-(apurinic or apyrimidinic site) lyase, mitochondrial	APEX1	26.0256	27.046	24.8575	26.1588	NaN	NaN	NaN	NaN	NaN	NaN	NaN	24.7917	25.0856	NaN	NaN	NaN	NaN	NaN	NaN	NaN	NaN	NaN	26.0911	NaN	24.6843	NaN	NaN	NaN	NaN	NaN	NaN	24.8445	NaN	25.4623	NaN	NaN	NaN	NaN	NaN	NaN	NaN	NaN	NaN	NaN	25.6211	25.2688	26.2947
Q9BZZ5	Apoptosis inhibitor 5	API5	NaN	24.1471	NaN	NaN	NaN	NaN	NaN	NaN	NaN	NaN	NaN	NaN	NaN	NaN	NaN	NaN	NaN	NaN	NaN	NaN	NaN	NaN	NaN	NaN	NaN	NaN	NaN	NaN	NaN	NaN	NaN	NaN	NaN	NaN	NaN	NaN	NaN	NaN	NaN	NaN	NaN	NaN	NaN	NaN	NaN	NaN	NaN
Q96GX9	Methylthioribulose-1-phosphate dehydratase	APIP	NaN	NaN	NaN	NaN	NaN	NaN	NaN	NaN	NaN	NaN	NaN	NaN	NaN	NaN	NaN	NaN	NaN	NaN	NaN	NaN	NaN	NaN	NaN	NaN	23.2081	NaN	NaN	NaN	NaN	NaN	NaN	NaN	NaN	NaN	NaN	NaN	NaN	NaN	NaN	NaN	NaN	NaN	NaN	NaN	NaN	NaN	NaN
Q9HDC9	Adipocyte plasma membrane-associated protein	APMAP	26.0313	26.765	29.1296	26.6349	27.0751	27.6486	25.1577	28.6127	29.3849	NaN	NaN	25.984	26.8597	NaN	NaN	27.1857	NaN	NaN	NaN	27.292	29.5642	NaN	26.4383	26.5108	27.3275	NaN	27.3368	NaN	25.1046	NaN	28.0802	NaN	27.1806	NaN	NaN	NaN	29.95	NaN	NaN	NaN	29.7583	28.6551	30.0389	26.7831	NaN	27.6285	27.8486
P02647	Apolipoprotein A-I;Proapolipoprotein A-I;Truncated apolipoprotein A-I	APOA1	34.5107	35.3343	38.6939	34.6359	38.8348	38.7125	37.7829	37.5901	37.825	36.6431	38.327	37.2944	31.1143	30.9811	29.592	26.9216	27.8303	27.6592	28.5298	25.1555	26.2775	26.4689	33.8782	36.4954	36.971	35.6362	34.4545	36.9495	38.8094	36.7035	38.905	36.3192	38.1927	30.9609	30.1573	28.0129	31.3862	28.5259	27.9125	29.3286	27.7363	25.3032	25.2279	29.2193	33.5769	32.934	37.873
Q8NCW5	NAD(P)H-hydrate epimerase	APOA1BP	23.2846	24.112	NaN	NaN	NaN	NaN	NaN	NaN	NaN	NaN	NaN	NaN	22.4593	NaN	NaN	NaN	NaN	NaN	NaN	NaN	NaN	NaN	22.5101	NaN	NaN	NaN	NaN	NaN	NaN	NaN	NaN	NaN	NaN	NaN	NaN	NaN	NaN	NaN	NaN	NaN	NaN	NaN	NaN	NaN	NaN	NaN	NaN
P02652	Apolipoprotein A-II;Proapolipoprotein A-II;Truncated apolipoprotein A-II	APOA2	29.7865	31.4761	33.6747	28.956	32.9463	33.4584	32.7769	32.384	33.7481	32.4589	33.5219	29.6959	26.008	NaN	NaN	NaN	NaN	NaN	NaN	NaN	NaN	NaN	29.8905	32.2272	32.347	31.6432	30.3956	29.287	34.8919	33.0467	35.6152	32.5917	35.2544	27.5402	NaN	NaN	27.1193	NaN	NaN	NaN	NaN	NaN	NaN	NaN	27.0771	27.5694	31.3371
P06727	Apolipoprotein A-IV	APOA4	32.5716	32.0951	36.5356	30.848	36.0484	36.2447	35.0574	35.2582	35.6899	33.8765	35.3082	32.6644	26.2912	26.1369	25.8657	23.8741	NaN	23.1256	22.3735	25.1437	24.1063	23.9611	33.1496	35.0092	35.7601	33.5654	32.9698	33.3666	35.6838	33.7397	36.6472	34.021	35.6698	21.4747	25.5224	24.3122	24.8528	24.3566	22.7604	25.267	25.7445	23.7297	26.3225	24.2359	32.607	32.4592	35.4419
P04114	Apolipoprotein B-100;Apolipoprotein B-48	APOB	33.057	34.0495	35.0447	31.9286	34.4459	34.2772	34.0444	34.75	35.0383	33.8399	34.685	33.777	28.2349	24.1332	26.5818	25.4278	25.0171	24.78	25.3164	25.6984	26.3868	24.9487	31.9751	31.958	33.2306	32.3432	27.477	32.1552	34.8878	33.1843	35.642	33.0434	35.8761	26.4163	26.4064	26.1039	25.2349	25.5515	24.6047	26.3554	25.8889	25.4962	25.0321	25.8631	27.9567	27.4786	32.082
Q9Y235	Probable C->U-editing enzyme APOBEC-2	APOBEC2	25.7241	25.0439	NaN	27.0882	23.828	NaN	24.5109	NaN	NaN	NaN	24.0069	NaN	25.6692	26.2518	26.5939	NaN	NaN	23.8204	NaN	NaN	NaN	NaN	NaN	NaN	NaN	26.5101	NaN	NaN	NaN	NaN	NaN	NaN	NaN	NaN	26.9078	NaN	25.3397	NaN	NaN	NaN	NaN	NaN	NaN	NaN	NaN	NaN	NaN
P02654	Apolipoprotein C-I;Truncated apolipoprotein C-I	APOC1	27.6726	27.7362	32.2843	28.4249	31.6554	32.1187	30.8702	31.2503	31.9465	30.4921	30.824	30.443	NaN	NaN	NaN	NaN	NaN	25.2575	NaN	NaN	NaN	NaN	30.0473	32.0829	30.5696	30.6679	29.2849	29.0028	32.1185	30.3018	32.6279	30.5943	32.0305	27.3961	NaN	30.3865	NaN	NaN	NaN	NaN	NaN	NaN	25.8121	NaN	30.9317	30.897	30.7613
P02655	Apolipoprotein C-II;Proapolipoprotein C-II	APOC2	NaN	25.9367	26.495	NaN	26.9067	NaN	25.5499	NaN	NaN	NaN	NaN	NaN	NaN	NaN	NaN	NaN	NaN	NaN	NaN	NaN	NaN	NaN	NaN	26.4824	27.3385	NaN	NaN	NaN	25.8639	25.2848	27.8474	NaN	NaN	NaN	NaN	NaN	NaN	NaN	NaN	NaN	NaN	23.8466	NaN	NaN	NaN	NaN	25.2345
P02656	Apolipoprotein C-III	APOC3	28.0904	28.4756	30.949	26.9774	31.0133	30.4186	30.1232	30.6131	31.0598	30.2193	30.379	25.4044	25.1307	NaN	NaN	NaN	NaN	25.4792	NaN	NaN	NaN	23.6975	27.2019	28.3479	29.2453	29.3396	27.7489	28.6029	30.1106	28.8904	30.6315	29.5265	30.493	27.0278	27.1858	NaN	27.8646	NaN	NaN	NaN	NaN	NaN	NaN	NaN	27.3795	27.243	29.1612
P55056	Apolipoprotein C-IV	APOC4	NaN	21.277	26.1191	NaN	24.755	26.6185	NaN	NaN	NaN	NaN	25.2734	26.3532	NaN	NaN	NaN	NaN	NaN	NaN	NaN	NaN	NaN	NaN	NaN	NaN	25.4533	NaN	NaN	NaN	NaN	NaN	26.523	NaN	23.8251	NaN	NaN	NaN	NaN	NaN	NaN	NaN	NaN	NaN	NaN	NaN	NaN	NaN	NaN
P05090	Apolipoprotein D	APOD	30.1308	29.5216	32.2764	29.3016	32.6209	31.6855	32.8686	32.1177	32.7956	32.9032	32.5586	30.373	30.7459	31.8974	30.2908	33.5777	33.2109	34.0839	34.6064	34.5946	34.2167	34.5995	31.8239	32.3717	30.3172	33.1176	33.4818	34.5072	32.9886	32.5795	32.2765	33.1125	32.8009	28.4486	31.7525	31.5794	30.0912	32.766	32.2464	33.6435	33.8318	33.9328	33.5652	33.9598	33.2742	33.9296	32.8483
P02649	Apolipoprotein E	APOE	30.5589	32.3368	36.305	29.8765	35.3029	35.2693	33.3436	35.1029	34.0131	32.6691	33.6293	30.5372	27.3787	24.3152	25.7608	27.5261	25.0659	28.813	27.1138	28.0864	26.4048	28.132	30.7764	33.2447	36.0835	31.8556	31.1137	31.0886	33.7817	32.1755	35.7262	31.8239	34.0777	26.234	24.8199	NaN	28.78	23.388	NaN	26.8618	24.7758	26.2507	27.3259	27.7961	30.023	30.0266	35.5943
Q13790	Apolipoprotein F	APOF	23.8655	25.3362	26.1964	NaN	26.4366	25.0702	24.7533	25.7267	26.8806	NaN	26.1873	NaN	NaN	NaN	NaN	NaN	NaN	NaN	NaN	NaN	NaN	NaN	NaN	25.901	NaN	NaN	NaN	NaN	25.5408	NaN	26.7003	NaN	26.0083	NaN	NaN	NaN	NaN	NaN	NaN	NaN	NaN	NaN	NaN	NaN	NaN	NaN	NaN
P02749	Beta-2-glycoprotein 1	APOH	32.3438	32.9489	33.3771	32.5115	33.9778	33.739	34.6694	33.4511	33.495	34.1344	34.5945	31.0772	29.7674	28.9622	29.5603	25.5222	NaN	27.4984	NaN	NaN	NaN	25.6637	32.2156	32.8137	32.6408	31.6839	34.2388	33.076	34.2876	33.8725	33.5746	33.2524	33.607	30.6597	29.807	NaN	29.3093	28.7941	29.0304	28.8576	28.1051	NaN	27.7199	29.1308	30.7351	31.489	30.7054
O14791	Apolipoprotein L1	APOL1	25.2509	27.0345	31.6029	25.0555	31.0795	31.1352	29.1651	30.7828	30.3803	28.3671	30.6167	29.4044	NaN	NaN	NaN	NaN	NaN	NaN	NaN	NaN	NaN	NaN	24.3096	27.5608	29.3596	27.943	NaN	25.8409	30.7474	29.1731	32.0175	29.2573	30.994	NaN	27.83	NaN	30.1965	NaN	28.3242	NaN	NaN	28.16	NaN	NaN	NaN	NaN	28.8835
O95445	Apolipoprotein M	APOM	24.9635	26.4333	28.7587	NaN	29.5146	29.485	28.4673	28.3112	28.7137	26.5454	29.8365	25.407	NaN	25.3454	NaN	NaN	NaN	NaN	NaN	NaN	NaN	NaN	25.348	27.1696	28.0194	27.1146	25.1366	NaN	29.8298	29.2878	31.8814	26.2799	31.0948	25.2838	25.5124	26.3962	23.9809	NaN	NaN	NaN	NaN	NaN	NaN	NaN	25.265	NaN	26.8032
Q9BUR5	Apolipoprotein O	APOO	23.7827	NaN	NaN	NaN	NaN	NaN	NaN	NaN	NaN	NaN	NaN	NaN	NaN	NaN	NaN	NaN	NaN	NaN	NaN	NaN	NaN	NaN	NaN	NaN	NaN	NaN	NaN	NaN	NaN	NaN	NaN	NaN	NaN	NaN	NaN	NaN	NaN	NaN	NaN	NaN	NaN	NaN	NaN	NaN	NaN	NaN	NaN
Q6UXV4	MICOS complex subunit MIC27	APOOL	NaN	NaN	NaN	23.2764	NaN	NaN	NaN	NaN	NaN	NaN	NaN	NaN	NaN	NaN	NaN	NaN	NaN	NaN	NaN	NaN	NaN	NaN	NaN	NaN	NaN	NaN	NaN	NaN	NaN	NaN	NaN	NaN	NaN	NaN	NaN	NaN	NaN	NaN	NaN	NaN	NaN	NaN	NaN	NaN	NaN	NaN	NaN
P05067	Amyloid beta A4 protein;N-APP;Soluble APP-alpha;Soluble APP-beta;C99;Beta-amyloid protein 42;Beta-amyloid protein 40;C83;P3(42);P3(40);C80;Gamma-secretase C-terminal fragment 59;Gamma-secretase C-terminal fragment 57;Gamma-secretase C-terminal fragment 50;C31	APP	NaN	NaN	NaN	NaN	NaN	NaN	NaN	NaN	NaN	NaN	NaN	NaN	NaN	NaN	NaN	NaN	NaN	NaN	NaN	26.0568	NaN	NaN	NaN	NaN	NaN	NaN	NaN	NaN	NaN	NaN	NaN	NaN	NaN	NaN	NaN	NaN	NaN	NaN	NaN	NaN	25.2474	NaN	NaN	NaN	NaN	NaN	NaN
Q9UKG1	DCC-interacting protein 13-alpha	APPL1	NaN	24.2947	NaN	NaN	NaN	NaN	NaN	NaN	NaN	NaN	NaN	NaN	NaN	NaN	NaN	NaN	NaN	NaN	NaN	NaN	NaN	NaN	NaN	NaN	NaN	NaN	NaN	NaN	NaN	NaN	NaN	NaN	NaN	NaN	NaN	NaN	NaN	NaN	NaN	NaN	NaN	NaN	NaN	NaN	NaN	NaN	NaN
Q8NEU8	DCC-interacting protein 13-beta	APPL2	NaN	21.6491	NaN	NaN	NaN	NaN	NaN	NaN	NaN	NaN	NaN	NaN	NaN	NaN	NaN	NaN	NaN	NaN	NaN	NaN	NaN	NaN	NaN	NaN	NaN	NaN	NaN	NaN	NaN	NaN	NaN	NaN	NaN	NaN	NaN	NaN	NaN	NaN	NaN	NaN	NaN	NaN	NaN	NaN	NaN	NaN	NaN
P07741	Adenine phosphoribosyltransferase	APRT	25.5756	26.4478	NaN	25.0732	23.5543	NaN	NaN	NaN	NaN	NaN	NaN	24.4667	24.7107	25.1238	NaN	24.4277	NaN	26.3869	NaN	NaN	NaN	24.8242	25.0286	NaN	25.6213	NaN	NaN	NaN	NaN	NaN	NaN	NaN	NaN	25.9542	26.0371	NaN	25.8558	NaN	NaN	NaN	NaN	NaN	NaN	NaN	NaN	NaN	NaN
P29972	Aquaporin-1	AQP1	27.2674	27.2071	NaN	27.1441	NaN	NaN	NaN	NaN	NaN	NaN	NaN	NaN	NaN	NaN	NaN	NaN	NaN	NaN	NaN	NaN	NaN	NaN	27.0979	NaN	NaN	NaN	NaN	NaN	NaN	NaN	NaN	NaN	NaN	29.7686	NaN	NaN	26.2221	NaN	28.7038	NaN	NaN	NaN	NaN	NaN	NaN	25.7722	NaN
P48444	Coatomer subunit delta	ARCN1	25.2517	25.8847	NaN	24.7307	24.4504	NaN	NaN	NaN	NaN	NaN	NaN	24.2972	23.7713	NaN	NaN	NaN	NaN	NaN	NaN	NaN	NaN	NaN	24.5886	NaN	NaN	NaN	NaN	NaN	NaN	NaN	NaN	NaN	NaN	NaN	NaN	NaN	NaN	NaN	NaN	NaN	NaN	NaN	NaN	NaN	NaN	NaN	23.6187
P84077;P61204	ADP-ribosylation factor 1;ADP-ribosylation factor 3	ARF1;ARF3	27.486	28.2066	26.2788	26.9015	26.1583	26.3846	25.7477	25.5058	NaN	25.579	NaN	27.4269	27.8434	27.9447	27.1325	27.4002	26.696	26.2914	27.0904	27.2196	25.6285	26.9321	27.9557	26.9595	28.1476	27.0871	26.5623	NaN	25.8058	NaN	26.3237	26.0032	25.3153	27.8077	27.8627	28.0806	28.0759	27.7115	26.377	26.7248	26.1693	NaN	NaN	NaN	27.2825	27.5584	28.2823
P18085	ADP-ribosylation factor 4	ARF4	27.5832	28.309	26.8321	26.1866	24.9688	26.1824	25.5684	26.2109	NaN	25.8179	24.9021	28.2654	28.4348	27.3019	28.5208	27.8091	26.7772	27.9567	26.5716	27.0717	27.2099	26.8986	28.0885	27.5713	28.8265	28.2337	27.8464	NaN	25.9482	26.5835	26.5664	26.5926	26.1757	27.9527	28.3242	28.1537	28.8974	27.5055	27.5189	25.0822	25.0214	26.3941	28.2658	NaN	27.5	27.1788	27.5159
P84085	ADP-ribosylation factor 5	ARF5	NaN	NaN	NaN	NaN	NaN	NaN	NaN	NaN	NaN	NaN	NaN	NaN	NaN	NaN	NaN	NaN	NaN	NaN	NaN	NaN	NaN	NaN	NaN	NaN	NaN	NaN	NaN	NaN	NaN	NaN	NaN	NaN	NaN	NaN	NaN	NaN	NaN	NaN	NaN	NaN	NaN	NaN	NaN	NaN	NaN	NaN	NaN
P62330	ADP-ribosylation factor 6	ARF6	NaN	22.1896	NaN	NaN	NaN	NaN	NaN	NaN	NaN	NaN	NaN	NaN	NaN	NaN	NaN	NaN	NaN	NaN	NaN	NaN	NaN	NaN	NaN	NaN	NaN	NaN	NaN	NaN	NaN	NaN	NaN	NaN	NaN	NaN	NaN	NaN	NaN	NaN	NaN	NaN	NaN	NaN	NaN	NaN	NaN	NaN	NaN
P05089	Arginase-1	ARG1	NaN	NaN	NaN	NaN	NaN	NaN	NaN	NaN	NaN	NaN	NaN	NaN	NaN	25.3291	NaN	NaN	NaN	NaN	NaN	NaN	NaN	NaN	NaN	NaN	NaN	NaN	NaN	NaN	NaN	NaN	NaN	NaN	NaN	NaN	NaN	NaN	NaN	NaN	NaN	NaN	NaN	NaN	NaN	NaN	NaN	NaN	NaN
Q07960	Rho GTPase-activating protein 1	ARHGAP1	26.3676	29.3925	NaN	25.7352	23.3266	NaN	NaN	NaN	NaN	NaN	23.5249	NaN	NaN	24.8017	NaN	NaN	NaN	NaN	NaN	NaN	NaN	NaN	27.1928	NaN	NaN	NaN	NaN	NaN	24.4109	NaN	NaN	NaN	NaN	25.8757	25.5647	NaN	25.9648	NaN	NaN	NaN	NaN	NaN	NaN	NaN	NaN	NaN	NaN
Q68EM7	Rho GTPase-activating protein 17	ARHGAP17	23.2733	NaN	NaN	23.9623	NaN	NaN	NaN	NaN	NaN	NaN	NaN	NaN	NaN	NaN	NaN	NaN	NaN	NaN	NaN	NaN	NaN	NaN	NaN	NaN	NaN	NaN	NaN	NaN	NaN	NaN	NaN	NaN	NaN	NaN	NaN	NaN	NaN	NaN	NaN	NaN	NaN	NaN	NaN	NaN	NaN	NaN	NaN
Q8N392	Rho GTPase-activating protein 18	ARHGAP18	19.9503	NaN	NaN	NaN	NaN	NaN	NaN	NaN	NaN	NaN	NaN	NaN	NaN	NaN	NaN	NaN	NaN	NaN	NaN	NaN	NaN	NaN	NaN	NaN	NaN	NaN	NaN	NaN	NaN	NaN	NaN	NaN	NaN	NaN	NaN	NaN	NaN	NaN	NaN	NaN	NaN	NaN	NaN	NaN	NaN	NaN	NaN
P42331	Rho GTPase-activating protein 25	ARHGAP25	NaN	NaN	NaN	NaN	NaN	NaN	NaN	NaN	NaN	NaN	NaN	NaN	NaN	NaN	NaN	NaN	NaN	NaN	NaN	NaN	NaN	NaN	NaN	NaN	NaN	NaN	NaN	NaN	NaN	NaN	NaN	NaN	NaN	NaN	NaN	NaN	NaN	NaN	NaN	NaN	NaN	NaN	NaN	NaN	NaN	NaN	NaN
P52565	Rho GDP-dissociation inhibitor 1	ARHGDIA	29.5887	30.1881	28.3931	29.5659	27.0452	25.5038	NaN	27.5763	NaN	26.8681	26.0477	28.3294	28.5647	28.9293	28.9082	28.8346	NaN	28.0814	NaN	NaN	27.6075	25.8305	28.3059	28.0134	29.1467	28.5816	27.4792	27.9728	26.0568	26.7312	27.3129	27.4336	27.1178	29.2024	28.8174	28.1714	29.1093	27.9643	28.5159	NaN	NaN	27.8237	NaN	NaN	28.6372	28.6148	27.7764
P52566	Rho GDP-dissociation inhibitor 2	ARHGDIB	28.7038	29.0427	25.7839	29.1606	NaN	23.9465	NaN	NaN	NaN	NaN	23.0653	NaN	25.902	25.9003	25.7165	NaN	NaN	NaN	NaN	NaN	NaN	NaN	27.7427	NaN	26.4625	NaN	NaN	NaN	NaN	NaN	NaN	NaN	NaN	NaN	NaN	NaN	25.3692	NaN	26.1643	NaN	NaN	NaN	27.1004	NaN	26.83	NaN	26.2588
Q14155;Q15052	Rho guanine nucleotide exchange factor 7;Rho guanine nucleotide exchange factor 6	ARHGEF7;ARHGEF6	NaN	21.7389	NaN	NaN	NaN	NaN	NaN	NaN	NaN	NaN	NaN	NaN	NaN	NaN	NaN	NaN	NaN	NaN	NaN	NaN	NaN	NaN	NaN	NaN	NaN	NaN	NaN	NaN	NaN	NaN	NaN	NaN	NaN	NaN	NaN	NaN	NaN	NaN	NaN	NaN	NaN	NaN	NaN	NaN	NaN	NaN	NaN
O14497	AT-rich interactive domain-containing protein 1A	ARID1A	NaN	NaN	26.1295	NaN	NaN	24.7158	27.056	27.2419	26.7418	NaN	26.8666	NaN	NaN	NaN	NaN	NaN	NaN	NaN	NaN	NaN	NaN	NaN	NaN	NaN	NaN	NaN	27.7056	28.2343	26.8089	26.3652	26.0973	27.9141	27.119	NaN	NaN	NaN	NaN	NaN	NaN	NaN	NaN	NaN	NaN	NaN	NaN	NaN	28.123
Q9Y4X5	E3 ubiquitin-protein ligase ARIH1	ARIH1	NaN	NaN	NaN	NaN	NaN	NaN	NaN	NaN	NaN	NaN	NaN	NaN	NaN	NaN	NaN	NaN	NaN	NaN	NaN	NaN	NaN	NaN	NaN	NaN	NaN	NaN	NaN	NaN	NaN	NaN	NaN	NaN	NaN	NaN	NaN	NaN	NaN	NaN	NaN	NaN	NaN	NaN	NaN	NaN	NaN	NaN	NaN
P36405	ADP-ribosylation factor-like protein 3	ARL3	24.8149	25.0987	NaN	24.651	NaN	NaN	NaN	NaN	NaN	NaN	NaN	24.8025	24.3523	NaN	NaN	NaN	NaN	NaN	NaN	NaN	NaN	NaN	24.7533	24.1615	25.0413	NaN	NaN	NaN	NaN	NaN	NaN	NaN	NaN	NaN	NaN	NaN	NaN	NaN	NaN	NaN	NaN	NaN	NaN	NaN	NaN	NaN	NaN
Q66PJ3	ADP-ribosylation factor-like protein 6-interacting protein 4	ARL6IP4	NaN	23.0634	NaN	NaN	NaN	NaN	NaN	NaN	NaN	NaN	NaN	NaN	NaN	NaN	NaN	NaN	NaN	NaN	NaN	NaN	NaN	NaN	NaN	NaN	NaN	NaN	NaN	NaN	NaN	NaN	NaN	NaN	NaN	NaN	NaN	NaN	NaN	NaN	NaN	NaN	NaN	NaN	NaN	NaN	NaN	NaN	NaN
O75915	PRA1 family protein 3	ARL6IP5	24.4626	24.6942	NaN	24.6913	NaN	NaN	NaN	NaN	NaN	NaN	NaN	NaN	NaN	25.0748	NaN	NaN	NaN	NaN	NaN	NaN	NaN	NaN	25.5022	NaN	NaN	NaN	NaN	NaN	NaN	NaN	NaN	NaN	NaN	NaN	NaN	NaN	NaN	NaN	NaN	NaN	NaN	NaN	NaN	NaN	NaN	NaN	NaN
Q9H993	Protein-glutamate O-methyltransferase	ARMT1	NaN	NaN	NaN	NaN	NaN	NaN	NaN	NaN	NaN	21.076	NaN	NaN	NaN	NaN	NaN	NaN	NaN	NaN	NaN	NaN	NaN	NaN	NaN	NaN	NaN	NaN	NaN	NaN	NaN	NaN	NaN	NaN	NaN	NaN	NaN	NaN	NaN	NaN	NaN	NaN	NaN	NaN	NaN	NaN	NaN	NaN	NaN
Q92747	Actin-related protein 2/3 complex subunit 1A	ARPC1A	NaN	23.7892	NaN	23.9952	NaN	NaN	NaN	NaN	NaN	NaN	NaN	NaN	NaN	NaN	NaN	NaN	NaN	NaN	NaN	NaN	NaN	NaN	NaN	NaN	NaN	NaN	NaN	NaN	NaN	NaN	NaN	NaN	NaN	NaN	NaN	NaN	NaN	NaN	NaN	NaN	NaN	NaN	NaN	NaN	NaN	NaN	NaN
O15143	Actin-related protein 2/3 complex subunit 1B	ARPC1B	27.6433	27.7373	NaN	26.5175	24.4517	NaN	NaN	NaN	NaN	NaN	NaN	NaN	26.0625	NaN	NaN	NaN	NaN	NaN	NaN	NaN	NaN	NaN	26.9583	NaN	NaN	NaN	NaN	NaN	NaN	NaN	NaN	NaN	NaN	NaN	26.1211	NaN	NaN	NaN	NaN	NaN	NaN	NaN	NaN	NaN	25.3817	NaN	NaN
O15144	Actin-related protein 2/3 complex subunit 2	ARPC2	28.525	28.9042	26.6055	27.8263	25.0557	26.2769	24.3649	23.2684	25.7477	NaN	NaN	25.8016	26.7321	27.0192	26.5072	25.8454	27.9195	25.3081	NaN	25.6126	25.1449	24.5195	27.0526	26.9919	26.4403	25.7868	24.7918	NaN	24.1493	NaN	25.5761	NaN	NaN	NaN	27.4371	NaN	26.3723	NaN	NaN	NaN	NaN	NaN	NaN	NaN	25.8549	26.8569	24.4884
O15145	Actin-related protein 2/3 complex subunit 3	ARPC3	24.6129	25.4321	23.6058	25.4764	NaN	NaN	NaN	NaN	NaN	NaN	23.8248	NaN	NaN	NaN	NaN	NaN	NaN	NaN	NaN	NaN	NaN	NaN	NaN	NaN	NaN	NaN	NaN	NaN	NaN	NaN	NaN	NaN	NaN	NaN	NaN	NaN	NaN	NaN	NaN	NaN	NaN	NaN	NaN	NaN	NaN	24.1673	NaN
P59998	Actin-related protein 2/3 complex subunit 4	ARPC4	26.9435	27.6384	26.3179	25.2442	25.2422	25.1488	NaN	NaN	24.5582	24.3811	NaN	26.5329	27.1205	26.3986	27.5501	26.3836	NaN	24.5294	NaN	NaN	NaN	26.9903	26.458	25.8956	27.1176	NaN	24.6504	NaN	NaN	24.7977	25.1244	25.5385	NaN	27.4915	26.7385	NaN	27.2759	26.657	NaN	NaN	NaN	NaN	26.6874	NaN	25.2853	25.5543	26.5842
O15511	Actin-related protein 2/3 complex subunit 5	ARPC5	26.6435	27.3658	NaN	26.6109	NaN	NaN	NaN	NaN	NaN	NaN	NaN	NaN	NaN	NaN	NaN	NaN	NaN	NaN	NaN	NaN	NaN	NaN	25.56	NaN	NaN	NaN	NaN	NaN	NaN	NaN	NaN	NaN	NaN	27.4815	25.4143	NaN	NaN	26.6345	NaN	NaN	NaN	NaN	NaN	NaN	NaN	NaN	NaN
Q9BPX5	Actin-related protein 2/3 complex subunit 5-like protein	ARPC5L	NaN	NaN	NaN	NaN	NaN	NaN	NaN	NaN	NaN	NaN	NaN	NaN	NaN	NaN	NaN	NaN	NaN	NaN	NaN	NaN	NaN	NaN	NaN	NaN	NaN	NaN	NaN	NaN	NaN	NaN	NaN	NaN	NaN	NaN	NaN	NaN	NaN	NaN	NaN	NaN	NaN	NaN	NaN	NaN	NaN	NaN	NaN
P49407	Beta-arrestin-1	ARRB1	NaN	NaN	NaN	NaN	NaN	NaN	NaN	NaN	NaN	NaN	NaN	NaN	NaN	NaN	NaN	NaN	NaN	NaN	NaN	NaN	NaN	NaN	NaN	NaN	NaN	NaN	NaN	NaN	NaN	NaN	NaN	NaN	NaN	NaN	NaN	NaN	NaN	NaN	NaN	NaN	NaN	NaN	NaN	24.6301	NaN	NaN	NaN
P15289	Arylsulfatase A;Arylsulfatase A component B;Arylsulfatase A component C	ARSA	NaN	26.3135	NaN	25.2116	NaN	NaN	NaN	NaN	NaN	NaN	NaN	NaN	NaN	NaN	NaN	NaN	NaN	NaN	NaN	NaN	NaN	NaN	NaN	NaN	NaN	NaN	NaN	NaN	NaN	NaN	NaN	NaN	NaN	NaN	NaN	NaN	NaN	NaN	NaN	NaN	NaN	NaN	NaN	NaN	NaN	NaN	NaN
P15848	Arylsulfatase B	ARSB	25.3401	25.3022	NaN	NaN	NaN	NaN	NaN	NaN	NaN	NaN	NaN	NaN	NaN	NaN	NaN	NaN	NaN	NaN	NaN	NaN	NaN	NaN	24.5702	NaN	NaN	NaN	NaN	NaN	NaN	NaN	NaN	NaN	NaN	NaN	NaN	NaN	NaN	NaN	NaN	NaN	NaN	NaN	NaN	NaN	NaN	NaN	NaN
Q13510	Acid ceramidase;Acid ceramidase subunit alpha;Acid ceramidase subunit beta	ASAH1	25.3124	26.5733	25.3859	24.6986	23.9443	NaN	NaN	NaN	NaN	NaN	NaN	NaN	NaN	NaN	NaN	NaN	NaN	NaN	NaN	NaN	NaN	24.5394	25.2243	NaN	NaN	NaN	25.6266	NaN	NaN	NaN	NaN	NaN	NaN	24.3996	NaN	NaN	NaN	NaN	NaN	NaN	NaN	NaN	NaN	NaN	25.1164	25.0577	NaN
P07307	Asialoglycoprotein receptor 2	ASGR2	NaN	NaN	NaN	NaN	NaN	NaN	NaN	NaN	NaN	NaN	NaN	NaN	NaN	NaN	25.752	NaN	NaN	NaN	NaN	NaN	NaN	NaN	NaN	NaN	NaN	NaN	NaN	NaN	NaN	NaN	NaN	NaN	NaN	NaN	NaN	NaN	NaN	NaN	NaN	NaN	NaN	NaN	NaN	NaN	NaN	NaN	NaN
P04424	Argininosuccinate lyase	ASL	NaN	21.5678	NaN	NaN	NaN	NaN	NaN	NaN	NaN	NaN	NaN	NaN	NaN	NaN	NaN	NaN	NaN	NaN	NaN	NaN	NaN	NaN	NaN	NaN	NaN	NaN	NaN	NaN	NaN	NaN	NaN	NaN	NaN	NaN	NaN	NaN	NaN	NaN	NaN	NaN	NaN	NaN	NaN	NaN	NaN	NaN	NaN
O95671	N-acetylserotonin O-methyltransferase-like protein	ASMTL	NaN	23.8773	NaN	NaN	NaN	NaN	NaN	NaN	NaN	NaN	NaN	NaN	NaN	NaN	NaN	NaN	NaN	NaN	NaN	NaN	NaN	NaN	NaN	NaN	NaN	NaN	NaN	NaN	NaN	NaN	NaN	NaN	NaN	NaN	NaN	NaN	NaN	NaN	NaN	NaN	NaN	NaN	NaN	NaN	NaN	NaN	NaN
O43681	ATPase ASNA1	ASNA1	23.7678	23.6665	NaN	23.5417	NaN	NaN	NaN	NaN	NaN	NaN	NaN	NaN	NaN	NaN	NaN	NaN	NaN	NaN	NaN	NaN	NaN	NaN	NaN	NaN	NaN	NaN	NaN	NaN	NaN	NaN	NaN	NaN	NaN	NaN	NaN	NaN	NaN	NaN	NaN	NaN	NaN	NaN	NaN	NaN	NaN	NaN	NaN
Q12797	Aspartyl/asparaginyl beta-hydroxylase	ASPH	27.0338	27.152	NaN	27.3329	NaN	25.2887	NaN	NaN	NaN	25.6939	NaN	25.6331	25.9917	NaN	NaN	25.7609	NaN	26.3456	NaN	NaN	NaN	26.301	26.3972	26.262	NaN	26.7752	NaN	NaN	NaN	NaN	NaN	NaN	NaN	NaN	NaN	NaN	NaN	NaN	NaN	NaN	NaN	NaN	NaN	NaN	26.3387	25.7562	25.5926
Q9BXN1	Asporin	ASPN	35.0534	35.4269	30.3333	35.5707	30.7817	29.6171	28.9717	28.7759	30.2023	29.8047	29.354	33.0963	32.903	32.1356	33.0161	32.6385	32.4284	31.499	31.1107	31.2724	31.5608	31.1172	35.3428	30.8215	30.5108	31.7371	30.0733	29.624	28.6818	29.3958	29.374	28.9305	28.9383	34.5329	32.6981	31.3897	33.8952	32.064	32.288	31.6157	31.1522	31.222	32.1268	30.2616	30.9297	31.4106	31.5156
P00966	Argininosuccinate synthase	ASS1	25.39	25.8424	25.5597	26.1952	24.9467	NaN	NaN	NaN	NaN	NaN	NaN	NaN	26.7667	NaN	NaN	25.5594	NaN	26.4743	NaN	26.3992	25.9562	NaN	25.1561	NaN	27.0854	26.2611	25.4724	NaN	NaN	NaN	25.8367	NaN	NaN	26.1839	26.6859	NaN	24.9743	26.2347	NaN	NaN	NaN	NaN	26.5362	NaN	26.1488	25.6878	26.2494
Q9C0F0	Putative Polycomb group protein ASXL3	ASXL3	NaN	NaN	NaN	NaN	NaN	NaN	NaN	NaN	NaN	NaN	NaN	NaN	NaN	NaN	NaN	NaN	NaN	NaN	NaN	NaN	NaN	NaN	NaN	NaN	NaN	NaN	NaN	NaN	NaN	NaN	NaN	NaN	NaN	NaN	NaN	NaN	NaN	NaN	NaN	NaN	NaN	NaN	NaN	NaN	NaN	NaN	NaN
Q5T9A4;Q9NVI7;Q5T2N8	ATPase family AAA domain-containing protein 3B;ATPase family AAA domain-containing protein 3A;ATPase family AAA domain-containing protein 3C	ATAD3B;ATAD3A;ATAD3C	NaN	24.1317	NaN	25.4881	NaN	NaN	NaN	NaN	NaN	NaN	NaN	26.4188	NaN	NaN	NaN	NaN	NaN	NaN	NaN	NaN	NaN	NaN	NaN	NaN	NaN	NaN	NaN	NaN	NaN	NaN	NaN	NaN	NaN	NaN	NaN	NaN	NaN	NaN	NaN	NaN	NaN	NaN	NaN	NaN	NaN	NaN	NaN
Q9NT62	Ubiquitin-like-conjugating enzyme ATG3	ATG3	NaN	23.2411	NaN	NaN	NaN	NaN	NaN	NaN	NaN	NaN	NaN	NaN	NaN	NaN	NaN	NaN	NaN	NaN	NaN	NaN	NaN	NaN	NaN	NaN	NaN	NaN	NaN	NaN	NaN	NaN	NaN	NaN	NaN	NaN	NaN	NaN	NaN	NaN	NaN	NaN	NaN	NaN	NaN	NaN	NaN	NaN	NaN
P31939	Bifunctional purine biosynthesis protein PURH;Phosphoribosylaminoimidazolecarboxamide formyltransferase;IMP cyclohydrolase	ATIC	25.3352	25.1605	NaN	24.9961	NaN	NaN	NaN	NaN	NaN	NaN	NaN	NaN	NaN	NaN	NaN	NaN	NaN	NaN	NaN	NaN	NaN	NaN	24.5523	NaN	NaN	23.7576	NaN	NaN	NaN	NaN	NaN	NaN	NaN	NaN	24.5534	NaN	NaN	NaN	NaN	NaN	NaN	NaN	NaN	NaN	NaN	NaN	NaN
Q6DD88	Atlastin-3	ATL3	NaN	25.4539	NaN	23.6319	NaN	NaN	NaN	NaN	NaN	NaN	NaN	NaN	NaN	NaN	NaN	NaN	NaN	NaN	NaN	NaN	NaN	NaN	NaN	NaN	NaN	NaN	NaN	NaN	NaN	NaN	NaN	NaN	NaN	NaN	NaN	NaN	NaN	NaN	NaN	NaN	NaN	NaN	NaN	NaN	NaN	NaN	NaN
O00244	Copper transport protein ATOX1	ATOX1	NaN	NaN	NaN	NaN	NaN	NaN	NaN	NaN	NaN	NaN	NaN	NaN	NaN	NaN	NaN	NaN	NaN	NaN	NaN	NaN	NaN	NaN	NaN	NaN	NaN	NaN	NaN	NaN	NaN	NaN	NaN	NaN	NaN	NaN	NaN	NaN	NaN	NaN	NaN	NaN	22.8744	NaN	NaN	NaN	NaN	NaN	NaN
Q9NQ11	Probable cation-transporting ATPase 13A2	ATP13A2	NaN	NaN	NaN	NaN	NaN	NaN	NaN	NaN	NaN	NaN	NaN	NaN	NaN	NaN	NaN	NaN	NaN	NaN	NaN	NaN	NaN	NaN	NaN	NaN	NaN	NaN	NaN	NaN	NaN	NaN	NaN	NaN	NaN	NaN	NaN	NaN	NaN	NaN	NaN	NaN	NaN	NaN	NaN	NaN	NaN	NaN	NaN
P05023	Sodium/potassium-transporting ATPase subunit alpha-1	ATP1A1	25.8373	25.9731	26.0195	25.8783	25.0013	25.9777	NaN	NaN	NaN	NaN	NaN	26.7699	26.4316	28.4058	28.004	28.4912	27.3644	26.7771	26.8604	26.7534	28.005	25.951	25.6919	26.6911	27.9473	26.7367	25.737	25.4637	25.7518	NaN	25.3999	25.7467	NaN	28.12	26.8087	NaN	27.0588	27.3763	28.0264	NaN	26.5391	25.6668	NaN	NaN	NaN	NaN	NaN
P50993	Sodium/potassium-transporting ATPase subunit alpha-2	ATP1A2	NaN	NaN	NaN	21.2544	NaN	NaN	NaN	NaN	NaN	NaN	NaN	NaN	NaN	NaN	NaN	NaN	NaN	NaN	NaN	NaN	NaN	NaN	NaN	NaN	NaN	NaN	NaN	NaN	NaN	NaN	NaN	NaN	NaN	NaN	NaN	NaN	NaN	NaN	NaN	NaN	NaN	NaN	NaN	NaN	NaN	NaN	NaN
P05026	Sodium/potassium-transporting ATPase subunit beta-1	ATP1B1	24.2198	NaN	23.5622	24.2799	NaN	24.5795	NaN	NaN	NaN	24.2286	NaN	24.7193	NaN	25.077	NaN	26.7046	24.2997	24.7929	NaN	NaN	24.9521	25.2881	NaN	NaN	NaN	NaN	NaN	NaN	NaN	NaN	NaN	NaN	NaN	NaN	NaN	NaN	NaN	NaN	NaN	NaN	NaN	NaN	NaN	NaN	24.4852	NaN	25.0134
P54709	Sodium/potassium-transporting ATPase subunit beta-3	ATP1B3	NaN	NaN	NaN	NaN	NaN	NaN	NaN	NaN	NaN	NaN	NaN	NaN	NaN	NaN	NaN	NaN	NaN	NaN	NaN	NaN	NaN	NaN	23.3339	NaN	NaN	NaN	NaN	NaN	NaN	NaN	NaN	NaN	NaN	NaN	NaN	NaN	NaN	NaN	NaN	NaN	NaN	NaN	NaN	NaN	NaN	NaN	NaN
O14983	Sarcoplasmic/endoplasmic reticulum calcium ATPase 1	ATP2A1	29.9417	24.2807	NaN	30.7116	NaN	NaN	NaN	27.9867	28.5913	NaN	25.2231	25.2167	23.5929	26.0416	25.5675	NaN	NaN	26.2844	28.0201	NaN	NaN	26.7909	25.8454	25.8588	NaN	NaN	26.3897	NaN	NaN	NaN	NaN	NaN	NaN	29.1011	NaN	NaN	26.3145	26.2293	NaN	25.7999	26.6732	27.7826	NaN	NaN	NaN	NaN	26.0093
P16615	Sarcoplasmic/endoplasmic reticulum calcium ATPase 2	ATP2A2	28.2662	24.5475	NaN	27.0449	NaN	NaN	24.2503	NaN	24.6222	NaN	NaN	NaN	NaN	NaN	NaN	NaN	NaN	NaN	NaN	NaN	NaN	NaN	25.7058	NaN	NaN	NaN	NaN	NaN	NaN	NaN	NaN	NaN	NaN	25.4105	NaN	NaN	NaN	NaN	NaN	NaN	NaN	NaN	NaN	NaN	NaN	NaN	NaN
Q93084	Sarcoplasmic/endoplasmic reticulum calcium ATPase 3	ATP2A3	24.2351	NaN	NaN	NaN	NaN	NaN	NaN	NaN	NaN	NaN	NaN	NaN	NaN	NaN	NaN	NaN	NaN	NaN	NaN	NaN	NaN	NaN	NaN	NaN	NaN	NaN	NaN	NaN	NaN	NaN	NaN	NaN	NaN	NaN	NaN	NaN	NaN	NaN	NaN	NaN	NaN	NaN	NaN	NaN	NaN	NaN	NaN
P23634	Plasma membrane calcium-transporting ATPase 4	ATP2B4	24.6186	24.638	NaN	24.6378	NaN	NaN	NaN	NaN	NaN	NaN	NaN	24.2164	23.8912	25.5719	25.1482	24.4572	NaN	NaN	NaN	NaN	NaN	NaN	25.2659	NaN	25.5408	NaN	NaN	NaN	NaN	NaN	NaN	NaN	NaN	25.4587	NaN	NaN	NaN	NaN	NaN	NaN	NaN	NaN	NaN	NaN	NaN	NaN	25.0873
P25705	ATP synthase subunit alpha, mitochondrial	ATP5A1	32.0024	30.9626	26.9851	32.7217	26.7511	26.7784	25.0443	25.2155	24.7995	26.1645	23.1336	28.1133	29.2372	28.6782	29.336	27.0593	27.4411	27.8542	29.0836	27.5827	26.4196	28.2054	30.3448	27.8287	27.3959	26.8646	26.2382	NaN	24.5156	23.6743	24.0518	24.9801	NaN	30.8261	28.2432	26.125	30.4018	28.1469	27.6008	27.4703	NaN	28.0954	25.4822	26.0063	27.7997	29.6144	28.0051
P06576	ATP synthase subunit beta, mitochondrial	ATP5B	32.8087	32.034	27.9312	33.3922	28.3647	26.8844	24.1877	23.3817	24.8368	23.0918	25.6638	28.3901	30.1374	29.7956	29.7295	27.7216	28.7425	27.8037	28.8989	25.9515	28.1476	28.5503	31.0871	27.8326	27.0195	27.7526	26.9335	NaN	24.9536	26.9132	23.6995	26.5734	23.3322	32.1789	29.2392	28.2301	30.7957	28.5321	28.567	27.3445	27.5686	28.714	26.2215	24.1009	27.5809	29.701	27.7697
P36542	ATP synthase subunit gamma, mitochondrial	ATP5C1	26.7923	25.8914	NaN	27.4756	NaN	NaN	NaN	NaN	NaN	NaN	NaN	NaN	NaN	NaN	NaN	NaN	NaN	NaN	NaN	NaN	NaN	NaN	NaN	NaN	NaN	NaN	NaN	NaN	NaN	NaN	NaN	NaN	NaN	NaN	NaN	NaN	NaN	NaN	NaN	NaN	NaN	NaN	NaN	NaN	NaN	NaN	NaN
P30049	ATP synthase subunit delta, mitochondrial	ATP5D	27.6121	27.5818	NaN	29.2953	NaN	NaN	NaN	NaN	NaN	NaN	NaN	25.2721	25.2244	NaN	NaN	NaN	NaN	24.5262	NaN	NaN	NaN	NaN	26.8169	NaN	25.1908	NaN	NaN	NaN	23.9788	NaN	NaN	NaN	NaN	25.9233	NaN	NaN	NaN	25.8087	NaN	NaN	NaN	NaN	NaN	NaN	NaN	25.9226	NaN
P24539	ATP synthase F(0) complex subunit B1, mitochondrial	ATP5F1	25.5701	25.1194	NaN	25.2835	NaN	NaN	NaN	NaN	NaN	NaN	NaN	NaN	NaN	NaN	NaN	NaN	NaN	NaN	NaN	NaN	NaN	NaN	24.5624	NaN	NaN	NaN	NaN	NaN	NaN	NaN	NaN	NaN	NaN	NaN	NaN	NaN	NaN	NaN	NaN	NaN	NaN	NaN	NaN	NaN	NaN	NaN	NaN
O75947	ATP synthase subunit d, mitochondrial	ATP5H	28.2635	27.9233	23.1919	30.0868	NaN	24.0532	NaN	NaN	NaN	NaN	23.7505	23.9193	25.1691	NaN	NaN	NaN	NaN	NaN	NaN	NaN	NaN	NaN	27.0619	NaN	NaN	NaN	NaN	NaN	NaN	NaN	NaN	NaN	NaN	27.4659	NaN	NaN	24.2335	NaN	NaN	NaN	NaN	NaN	NaN	NaN	NaN	23.4358	NaN
P56385	ATP synthase subunit e, mitochondrial	ATP5I	NaN	NaN	NaN	27.1484	NaN	NaN	NaN	NaN	NaN	NaN	NaN	NaN	NaN	NaN	NaN	NaN	NaN	NaN	NaN	NaN	NaN	NaN	NaN	NaN	NaN	NaN	NaN	NaN	NaN	NaN	NaN	NaN	NaN	NaN	NaN	NaN	NaN	NaN	NaN	NaN	NaN	NaN	NaN	NaN	NaN	NaN	NaN
P18859	ATP synthase-coupling factor 6, mitochondrial	ATP5J	25.7428	25.2257	NaN	27.0225	NaN	NaN	NaN	NaN	NaN	NaN	NaN	NaN	NaN	NaN	NaN	NaN	NaN	NaN	NaN	NaN	NaN	NaN	NaN	NaN	NaN	NaN	NaN	NaN	NaN	NaN	NaN	NaN	NaN	NaN	NaN	NaN	26.1538	NaN	NaN	NaN	NaN	NaN	NaN	NaN	NaN	NaN	NaN
P56134	ATP synthase subunit f, mitochondrial	ATP5J2	NaN	NaN	NaN	24.2306	NaN	NaN	NaN	NaN	NaN	NaN	NaN	NaN	NaN	NaN	NaN	NaN	NaN	NaN	NaN	NaN	NaN	NaN	NaN	NaN	NaN	NaN	NaN	NaN	NaN	NaN	NaN	NaN	NaN	NaN	NaN	NaN	NaN	NaN	NaN	NaN	NaN	NaN	NaN	NaN	NaN	NaN	NaN
P48047	ATP synthase subunit O, mitochondrial	ATP5O	27.3126	26.2027	NaN	28.789	NaN	NaN	NaN	NaN	NaN	NaN	NaN	23.8591	24.833	NaN	NaN	NaN	NaN	NaN	NaN	NaN	NaN	NaN	24.3953	NaN	NaN	NaN	NaN	NaN	NaN	NaN	NaN	NaN	NaN	27.1785	NaN	NaN	NaN	26.1951	NaN	NaN	NaN	NaN	NaN	NaN	NaN	NaN	NaN
Q15904	V-type proton ATPase subunit S1	ATP6AP1	NaN	NaN	NaN	NaN	NaN	NaN	NaN	NaN	NaN	NaN	25.2005	NaN	NaN	NaN	NaN	NaN	NaN	NaN	NaN	NaN	NaN	NaN	NaN	NaN	NaN	NaN	NaN	NaN	NaN	NaN	NaN	NaN	24.8859	NaN	NaN	NaN	NaN	NaN	NaN	NaN	NaN	NaN	NaN	NaN	NaN	NaN	NaN
O75787	Renin receptor	ATP6AP2	NaN	NaN	NaN	NaN	25.0978	25.84	25.1414	25.7533	NaN	25.089	NaN	NaN	NaN	NaN	NaN	26.9206	NaN	NaN	NaN	25.1898	NaN	26.1475	24.934	25.3008	NaN	NaN	25.7668	26.4374	25.9106	25.1378	25.1357	27.6034	NaN	NaN	NaN	NaN	NaN	NaN	NaN	NaN	25.4289	NaN	NaN	26.1916	NaN	NaN	NaN
P61421	V-type proton ATPase subunit d 1	ATP6V0D1	NaN	NaN	NaN	NaN	NaN	NaN	NaN	NaN	NaN	NaN	NaN	NaN	NaN	NaN	NaN	NaN	NaN	NaN	NaN	NaN	NaN	NaN	NaN	NaN	NaN	NaN	NaN	NaN	NaN	NaN	NaN	NaN	NaN	NaN	NaN	26.2518	NaN	NaN	NaN	NaN	NaN	NaN	NaN	NaN	NaN	NaN	NaN
P38606	V-type proton ATPase catalytic subunit A	ATP6V1A	23.5706	24.6766	NaN	24.5225	NaN	NaN	NaN	NaN	NaN	NaN	NaN	NaN	NaN	NaN	NaN	NaN	NaN	NaN	NaN	NaN	NaN	NaN	24.1321	NaN	23.9259	NaN	NaN	NaN	NaN	NaN	NaN	NaN	NaN	NaN	NaN	NaN	NaN	NaN	NaN	NaN	NaN	NaN	NaN	NaN	NaN	24.9693	NaN
P21281	V-type proton ATPase subunit B, brain isoform	ATP6V1B2	26.1966	26.4622	NaN	26.7077	NaN	NaN	NaN	NaN	NaN	NaN	NaN	NaN	NaN	NaN	NaN	NaN	NaN	NaN	NaN	NaN	NaN	NaN	25.2211	NaN	NaN	NaN	NaN	NaN	NaN	NaN	NaN	NaN	NaN	NaN	NaN	NaN	NaN	NaN	NaN	NaN	NaN	NaN	NaN	NaN	NaN	NaN	NaN
P21283	V-type proton ATPase subunit C 1	ATP6V1C1	22.8726	24.3231	NaN	NaN	NaN	NaN	NaN	NaN	NaN	NaN	NaN	NaN	NaN	NaN	NaN	NaN	NaN	NaN	NaN	NaN	NaN	NaN	NaN	NaN	NaN	NaN	NaN	NaN	NaN	NaN	NaN	NaN	NaN	NaN	NaN	NaN	NaN	NaN	NaN	NaN	NaN	NaN	NaN	NaN	NaN	NaN	NaN
Q9Y5K8	V-type proton ATPase subunit D	ATP6V1D	24.5318	24.3788	NaN	NaN	NaN	NaN	NaN	NaN	NaN	NaN	NaN	NaN	NaN	NaN	NaN	NaN	NaN	NaN	NaN	NaN	NaN	NaN	NaN	NaN	NaN	NaN	NaN	NaN	NaN	NaN	NaN	NaN	NaN	NaN	NaN	NaN	NaN	NaN	NaN	NaN	NaN	NaN	NaN	NaN	NaN	NaN	NaN
P36543	V-type proton ATPase subunit E 1	ATP6V1E1	24.0591	25.0888	NaN	25.9254	NaN	NaN	NaN	NaN	NaN	NaN	NaN	NaN	NaN	NaN	NaN	NaN	NaN	NaN	NaN	NaN	NaN	NaN	25.2697	NaN	NaN	NaN	NaN	NaN	NaN	NaN	NaN	NaN	NaN	NaN	NaN	27.3282	NaN	NaN	NaN	NaN	NaN	29.0295	26.6645	NaN	NaN	NaN	NaN
Q16864	V-type proton ATPase subunit F	ATP6V1F	NaN	NaN	NaN	NaN	NaN	NaN	NaN	NaN	NaN	NaN	NaN	NaN	NaN	NaN	NaN	NaN	NaN	NaN	NaN	NaN	NaN	NaN	NaN	NaN	NaN	NaN	NaN	NaN	NaN	NaN	NaN	NaN	NaN	NaN	NaN	NaN	NaN	NaN	NaN	NaN	NaN	NaN	NaN	NaN	NaN	NaN	NaN
O75348	V-type proton ATPase subunit G 1	ATP6V1G1	25.3608	26.7529	NaN	NaN	NaN	NaN	NaN	NaN	NaN	NaN	NaN	NaN	NaN	NaN	NaN	NaN	NaN	NaN	NaN	NaN	NaN	NaN	25.5572	NaN	26.1863	NaN	NaN	NaN	NaN	NaN	NaN	NaN	NaN	NaN	NaN	NaN	NaN	NaN	NaN	NaN	NaN	NaN	NaN	NaN	NaN	NaN	25.26
Q9UI12	V-type proton ATPase subunit H	ATP6V1H	NaN	24.6146	NaN	NaN	NaN	NaN	NaN	NaN	NaN	NaN	NaN	NaN	NaN	NaN	NaN	NaN	NaN	NaN	NaN	NaN	NaN	NaN	NaN	NaN	NaN	NaN	NaN	NaN	NaN	NaN	NaN	NaN	NaN	NaN	NaN	NaN	NaN	NaN	NaN	NaN	NaN	NaN	NaN	NaN	NaN	NaN	NaN
O75882	Attractin	ATRN	25.871	24.4994	25.0258	25.4829	27.8434	26.2445	27.8973	27.2386	28.013	27.4462	27.9442	26.9454	26.2384	28.3559	NaN	29.2325	28.4633	28.7453	28.8199	29.0467	29.0598	29.3582	25.8926	25.4927	NaN	NaN	26.6301	27.0698	28.0919	27.908	27.8523	27.6011	27.9699	26.8646	27.9091	NaN	28.3108	27.7533	28.7076	29.0725	29.417	27.5187	28.4196	28.0884	NaN	26.6755	NaN
Q13825	Methylglutaconyl-CoA hydratase, mitochondrial	AUH	NaN	NaN	NaN	NaN	NaN	NaN	NaN	NaN	NaN	NaN	NaN	NaN	NaN	NaN	NaN	NaN	NaN	NaN	NaN	NaN	NaN	NaN	NaN	NaN	29.8577	NaN	NaN	NaN	NaN	NaN	NaN	NaN	NaN	NaN	NaN	NaN	NaN	NaN	NaN	NaN	NaN	NaN	NaN	NaN	NaN	NaN	NaN
P25311	Zinc-alpha-2-glycoprotein	AZGP1	31.0402	30.7834	31.0468	31.0999	31.8424	31.014	32.606	31.9886	32.4279	32.299	32.5299	28.6611	27.4932	28.3491	28.3291	27.1332	NaN	26.8538	27.0644	24.5751	27.0444	28.0374	29.2914	30.1353	30.2503	29.9262	31.4655	31.4331	32.0334	31.3564	30.8376	32.2791	31.5525	29.4278	NaN	27.6649	28.6802	26.7903	NaN	25.1795	25.1373	NaN	24.9449	NaN	26.5186	29.5169	28.3013
P20160	Azurocidin	AZU1	NaN	NaN	NaN	25.9579	NaN	NaN	NaN	NaN	NaN	NaN	NaN	NaN	NaN	NaN	NaN	NaN	NaN	NaN	NaN	NaN	NaN	NaN	NaN	NaN	NaN	NaN	NaN	NaN	NaN	NaN	NaN	NaN	NaN	NaN	NaN	NaN	NaN	NaN	NaN	NaN	NaN	NaN	NaN	NaN	NaN	NaN	NaN
P61769	Beta-2-microglobulin;Beta-2-microglobulin form pI 5.3	B2M	27.4297	27.6405	25.7066	26.0677	NaN	26.7808	NaN	27.0591	24.9452	27.467	28.4338	NaN	NaN	27.2266	NaN	25.2971	26.1151	NaN	25.6459	NaN	NaN	NaN	25.628	26.5048	27.1112	NaN	25.642	NaN	25.8859	28.4516	26.5297	NaN	NaN	NaN	NaN	NaN	NaN	NaN	NaN	27.1863	25.0352	NaN	25.4872	NaN	27.1797	27.253	27.5893
Q8NFL0	UDP-GlcNAc:betaGal beta-1,3-N-acetylglucosaminyltransferase 7	B3GNT7	24.6601	21.6772	25.845	NaN	26.4189	26.5805	26.2374	26.8315	27.1444	27.4612	28.2747	26.5976	27.1524	25.8215	NaN	28.0484	27.4209	27.3679	27.9419	28.2255	28.1496	28.2646	26.8769	27.6302	NaN	27.6375	28.2056	29.5927	26.759	28.2153	27.4347	28.6851	27.7228	NaN	27.3838	27.133	NaN	27.7803	28.3426	29.0492	27.3834	28.0525	28.223	28.8865	26.9834	28.2222	26.8937
Q6UX72	UDP-GlcNAc:betaGal beta-1,3-N-acetylglucosaminyltransferase 9	B3GNT9	NaN	NaN	NaN	NaN	NaN	NaN	NaN	NaN	NaN	NaN	NaN	23.2217	NaN	NaN	NaN	NaN	NaN	NaN	NaN	NaN	NaN	NaN	NaN	NaN	NaN	NaN	NaN	NaN	NaN	NaN	NaN	NaN	NaN	NaN	NaN	NaN	NaN	NaN	NaN	NaN	NaN	NaN	NaN	NaN	24.06	23.7071	NaN
O60513	Beta-1,4-galactosyltransferase 4;N-acetyllactosamine synthase;Lactotriaosylceramide beta-1,4-galactosyltransferase	B4GALT4	NaN	NaN	NaN	NaN	NaN	NaN	NaN	NaN	NaN	NaN	NaN	NaN	NaN	NaN	NaN	NaN	NaN	NaN	NaN	NaN	NaN	NaN	NaN	26.415	NaN	NaN	NaN	25.5015	NaN	NaN	NaN	NaN	NaN	NaN	NaN	NaN	NaN	NaN	NaN	NaN	NaN	NaN	NaN	NaN	25.4935	NaN	NaN
O43505	Beta-1,4-glucuronyltransferase 1	B4GAT1	22.1741	NaN	NaN	NaN	NaN	NaN	NaN	NaN	NaN	NaN	NaN	NaN	NaN	NaN	NaN	NaN	NaN	NaN	NaN	NaN	26.6671	24.3182	NaN	NaN	NaN	NaN	NaN	NaN	NaN	NaN	NaN	NaN	NaN	NaN	NaN	NaN	NaN	NaN	NaN	NaN	NaN	NaN	NaN	NaN	NaN	NaN	NaN
Q9NWV8	BRISC and BRCA1-A complex member 1	BABAM1	NaN	NaN	NaN	23.1586	NaN	NaN	NaN	NaN	NaN	NaN	NaN	NaN	NaN	NaN	NaN	NaN	NaN	NaN	NaN	NaN	NaN	NaN	NaN	NaN	NaN	NaN	NaN	NaN	NaN	NaN	NaN	NaN	NaN	NaN	NaN	NaN	NaN	NaN	NaN	NaN	NaN	NaN	NaN	NaN	NaN	NaN	NaN
O95816	BAG family molecular chaperone regulator 2	BAG2	NaN	24.4458	NaN	24.9189	NaN	NaN	NaN	NaN	NaN	NaN	NaN	NaN	NaN	23.745	NaN	NaN	NaN	NaN	NaN	NaN	NaN	NaN	NaN	NaN	NaN	NaN	NaN	NaN	NaN	NaN	NaN	NaN	NaN	NaN	NaN	NaN	NaN	NaN	NaN	NaN	NaN	NaN	NaN	NaN	NaN	NaN	NaN
O95817	BAG family molecular chaperone regulator 3	BAG3	25.1088	24.8766	NaN	26.2665	NaN	NaN	NaN	NaN	NaN	NaN	NaN	NaN	NaN	NaN	NaN	NaN	NaN	NaN	NaN	NaN	NaN	NaN	NaN	NaN	NaN	NaN	NaN	NaN	NaN	NaN	NaN	NaN	NaN	NaN	NaN	NaN	NaN	NaN	NaN	NaN	NaN	NaN	NaN	NaN	NaN	NaN	NaN
P46379	Large proline-rich protein BAG6	BAG6	21.3604	NaN	NaN	NaN	NaN	NaN	NaN	NaN	NaN	NaN	NaN	NaN	NaN	NaN	NaN	NaN	NaN	NaN	NaN	NaN	NaN	NaN	NaN	NaN	NaN	NaN	NaN	NaN	NaN	NaN	NaN	NaN	NaN	NaN	NaN	NaN	NaN	NaN	NaN	NaN	NaN	NaN	NaN	NaN	NaN	NaN	NaN
O75531	Barrier-to-autointegration factor;Barrier-to-autointegration factor, N-terminally processed	BANF1	25.3853	26.203	NaN	26.361	NaN	NaN	NaN	NaN	NaN	NaN	NaN	25.3651	25.0409	NaN	NaN	NaN	NaN	NaN	NaN	NaN	NaN	NaN	NaN	NaN	NaN	NaN	NaN	NaN	NaN	NaN	NaN	NaN	NaN	NaN	25.1626	NaN	NaN	NaN	NaN	NaN	NaN	NaN	NaN	NaN	NaN	24.6423	NaN
P80723	Brain acid soluble protein 1	BASP1	28.5335	28.0442	NaN	30.173	NaN	NaN	NaN	NaN	NaN	NaN	NaN	NaN	25.1601	NaN	NaN	NaN	NaN	NaN	NaN	NaN	NaN	NaN	27.8935	NaN	NaN	NaN	NaN	NaN	NaN	NaN	NaN	NaN	NaN	NaN	NaN	NaN	24.5591	NaN	NaN	NaN	NaN	NaN	NaN	NaN	26.4028	25.4459	NaN
Q07812	Apoptosis regulator BAX	BAX	22.0185	23.9757	NaN	NaN	NaN	NaN	NaN	NaN	NaN	NaN	NaN	NaN	NaN	NaN	NaN	NaN	NaN	NaN	NaN	NaN	NaN	NaN	NaN	NaN	NaN	NaN	NaN	NaN	NaN	NaN	NaN	NaN	NaN	NaN	NaN	NaN	NaN	NaN	NaN	NaN	NaN	NaN	NaN	NaN	NaN	NaN	NaN
P50895	Basal cell adhesion molecule	BCAM	26.2079	26.0052	NaN	27.9208	NaN	NaN	NaN	NaN	NaN	NaN	NaN	NaN	NaN	NaN	NaN	NaN	NaN	24.6254	NaN	NaN	NaN	NaN	NaN	NaN	NaN	NaN	NaN	NaN	NaN	NaN	NaN	NaN	NaN	NaN	NaN	NaN	NaN	NaN	NaN	NaN	NaN	NaN	NaN	NaN	NaN	25.2947	NaN
Q96GW7	Brevican core protein	BCAN	29.1377	28.8057	30.1035	28.6112	29.0978	29.2844	30.3978	29.4476	29.3814	30.5825	29.3558	27.8318	29.2002	31.0628	NaN	29.6579	29.6482	30.4543	31.6978	31.6662	32.78	32.3496	27.8988	30.6568	NaN	30.6295	29.9803	30.8953	28.0242	30.4441	29.7078	31.5251	NaN	29.8989	30.7018	NaN	29.5062	NaN	31.6118	31.783	31.3075	31.7309	31.0811	32.4406	30.5057	30.8151	29.1989
P51572	B-cell receptor-associated protein 31	BCAP31	NaN	NaN	NaN	NaN	NaN	NaN	NaN	NaN	NaN	NaN	NaN	NaN	NaN	NaN	NaN	NaN	NaN	NaN	NaN	NaN	NaN	NaN	NaN	NaN	NaN	NaN	NaN	NaN	NaN	NaN	NaN	NaN	NaN	NaN	NaN	NaN	NaN	NaN	NaN	NaN	NaN	NaN	NaN	NaN	NaN	NaN	NaN
O75934	Pre-mRNA-splicing factor SPF27	BCAS2	NaN	23.1725	NaN	NaN	NaN	NaN	NaN	NaN	NaN	NaN	NaN	NaN	NaN	NaN	NaN	NaN	NaN	NaN	NaN	NaN	NaN	NaN	NaN	NaN	NaN	NaN	NaN	NaN	NaN	NaN	NaN	NaN	NaN	NaN	NaN	NaN	NaN	NaN	NaN	NaN	NaN	NaN	NaN	NaN	NaN	NaN	NaN
P54687	Branched-chain-amino-acid aminotransferase, cytosolic	BCAT1	23.8127	24.5017	NaN	NaN	23.7411	24.4306	24.155	NaN	NaN	NaN	23.2989	25.1361	24.0538	23.9875	NaN	NaN	23.9387	NaN	NaN	NaN	NaN	NaN	23.6716	24.0613	26.1204	25.0295	23.9614	NaN	24.1353	NaN	NaN	NaN	NaN	NaN	NaN	NaN	NaN	NaN	NaN	NaN	NaN	NaN	NaN	NaN	NaN	NaN	25.3274
P06276	Cholinesterase	BCHE	NaN	NaN	NaN	NaN	NaN	NaN	NaN	NaN	NaN	NaN	23.0051	NaN	NaN	NaN	NaN	NaN	NaN	NaN	NaN	NaN	NaN	NaN	NaN	NaN	NaN	NaN	NaN	NaN	NaN	NaN	24.2736	NaN	NaN	NaN	NaN	NaN	NaN	NaN	NaN	NaN	NaN	NaN	NaN	NaN	NaN	NaN	NaN
P12694	2-oxoisovalerate dehydrogenase subunit alpha, mitochondrial	BCKDHA	NaN	NaN	NaN	23.4986	NaN	NaN	NaN	NaN	NaN	NaN	NaN	NaN	NaN	NaN	NaN	NaN	NaN	NaN	NaN	NaN	NaN	NaN	NaN	NaN	NaN	NaN	NaN	NaN	NaN	NaN	NaN	NaN	NaN	NaN	NaN	NaN	NaN	NaN	NaN	NaN	NaN	NaN	NaN	NaN	NaN	NaN	NaN
Q9BXK5	Bcl-2-like protein 13	BCL2L13	NaN	NaN	NaN	NaN	NaN	NaN	NaN	NaN	NaN	NaN	NaN	NaN	NaN	NaN	NaN	NaN	NaN	NaN	NaN	NaN	NaN	NaN	NaN	NaN	NaN	NaN	NaN	NaN	NaN	NaN	NaN	NaN	NaN	23.47	NaN	NaN	NaN	NaN	NaN	NaN	NaN	NaN	NaN	NaN	NaN	NaN	NaN
Q9NYF8	Bcl-2-associated transcription factor 1	BCLAF1	NaN	21.1935	NaN	NaN	NaN	NaN	NaN	NaN	NaN	NaN	NaN	NaN	NaN	NaN	NaN	NaN	NaN	NaN	NaN	NaN	NaN	NaN	NaN	NaN	NaN	NaN	NaN	NaN	NaN	NaN	NaN	NaN	NaN	NaN	NaN	NaN	NaN	NaN	NaN	NaN	NaN	NaN	NaN	NaN	NaN	NaN	NaN
Q9BUT1	3-hydroxybutyrate dehydrogenase type 2	BDH2	NaN	NaN	24.1292	24.6605	NaN	NaN	NaN	NaN	NaN	NaN	NaN	NaN	NaN	26.2525	26.0329	NaN	NaN	NaN	NaN	NaN	NaN	NaN	NaN	NaN	NaN	NaN	NaN	NaN	NaN	NaN	NaN	NaN	NaN	NaN	NaN	NaN	NaN	NaN	NaN	NaN	NaN	NaN	NaN	NaN	NaN	NaN	NaN
P21810	Biglycan	BGN	37.1188	37.2978	36.3678	36.4362	37.5297	36.0715	35.3085	35.2027	34.7671	35.6879	34.5969	39.0357	39.4126	38.7743	38.7495	38.0785	38.0038	36.8695	37.4948	37.1716	36.8052	36.2437	37.1218	37.3381	36.5771	36.7543	37.0885	36.8549	35.235	35.8076	34.8776	35.5628	33.8467	38.0861	38.9202	38.9405	38.3969	38.3215	37.8447	37.584	37.0436	37.488	37.7755	36.1244	37.8719	37.7986	37.0045
P55957	BH3-interacting domain death agonist;BH3-interacting domain death agonist p15;BH3-interacting domain death agonist p13;BH3-interacting domain death agonist p11	BID	NaN	NaN	NaN	NaN	NaN	NaN	NaN	NaN	NaN	NaN	NaN	NaN	NaN	NaN	NaN	NaN	NaN	NaN	NaN	NaN	NaN	NaN	NaN	NaN	NaN	NaN	NaN	NaN	NaN	NaN	NaN	NaN	NaN	NaN	NaN	NaN	NaN	NaN	NaN	NaN	NaN	NaN	NaN	NaN	NaN	NaN	NaN
O00499	Myc box-dependent-interacting protein 1	BIN1	30.0201	27.1297	NaN	30.987	26.4136	25.9307	NaN	28.808	NaN	NaN	NaN	26.0096	25.6621	NaN	28.1519	24.9121	NaN	NaN	NaN	NaN	25.573	NaN	27.3874	NaN	NaN	NaN	25.8204	NaN	NaN	NaN	NaN	25.7558	NaN	26.9115	NaN	NaN	26.7827	NaN	NaN	27.9813	26.534	NaN	26.3331	27.0647	26.3468	25.6652	NaN
Q13867	Bleomycin hydrolase	BLMH	23.2029	24.1113	NaN	NaN	NaN	NaN	NaN	NaN	NaN	NaN	NaN	NaN	NaN	NaN	NaN	NaN	NaN	NaN	NaN	NaN	NaN	NaN	NaN	NaN	NaN	NaN	NaN	NaN	NaN	NaN	NaN	NaN	NaN	NaN	NaN	NaN	NaN	NaN	NaN	NaN	NaN	NaN	NaN	NaN	NaN	NaN	NaN
Q6QNY1	Biogenesis of lysosome-related organelles complex 1 subunit 2	BLOC1S2	NaN	NaN	NaN	22.7865	NaN	NaN	NaN	NaN	NaN	NaN	NaN	NaN	NaN	NaN	NaN	NaN	NaN	NaN	NaN	NaN	NaN	NaN	NaN	NaN	NaN	NaN	NaN	NaN	NaN	NaN	NaN	NaN	NaN	NaN	NaN	NaN	NaN	NaN	NaN	NaN	NaN	NaN	NaN	NaN	NaN	NaN	NaN
Q6QNY0	Biogenesis of lysosome-related organelles complex 1 subunit 3	BLOC1S3	NaN	NaN	NaN	NaN	NaN	NaN	NaN	NaN	NaN	NaN	NaN	NaN	NaN	NaN	NaN	NaN	NaN	NaN	NaN	NaN	NaN	NaN	NaN	NaN	NaN	NaN	NaN	NaN	NaN	NaN	NaN	NaN	NaN	NaN	NaN	NaN	NaN	NaN	NaN	NaN	NaN	NaN	NaN	NaN	NaN	NaN	NaN
P53004	Biliverdin reductase A	BLVRA	24.606	26.2039	NaN	25.0929	NaN	NaN	NaN	NaN	NaN	NaN	NaN	NaN	NaN	NaN	NaN	NaN	NaN	NaN	NaN	NaN	NaN	NaN	25.1975	NaN	NaN	NaN	NaN	NaN	NaN	NaN	NaN	NaN	NaN	NaN	NaN	NaN	NaN	NaN	NaN	NaN	NaN	NaN	NaN	NaN	NaN	NaN	NaN
P30043	Flavin reductase (NADPH)	BLVRB	29.598	29.8215	28.0294	29.9067	25.6137	25.7109	24.7191	25.2113	NaN	24.3235	24.2399	NaN	25.1013	28.4927	28.5693	24.8257	24.6807	NaN	NaN	NaN	NaN	NaN	29.4845	28.4576	27.944	28.1051	26.7603	NaN	25.9957	24.8658	26.9606	NaN	26.3833	28.7838	24.8559	24.3992	NaN	24.9089	NaN	NaN	NaN	NaN	NaN	NaN	28.1617	26.2822	26.7176
P13497	Bone morphogenetic protein 1	BMP1	NaN	24.4022	25.9827	NaN	24.9919	25.3351	24.9879	25.7898	24.9577	NaN	24.9604	NaN	NaN	NaN	NaN	NaN	NaN	24.8214	NaN	NaN	27.9263	25.2623	24.5801	25.3389	25.5521	NaN	24.6409	24.7169	24.9735	NaN	26.6549	NaN	25.8424	NaN	NaN	NaN	NaN	NaN	26.5364	NaN	NaN	NaN	NaN	NaN	NaN	24.9581	25.5693
P12645	Bone morphogenetic protein 3	BMP3	NaN	NaN	NaN	24.969	NaN	NaN	NaN	NaN	NaN	NaN	NaN	NaN	NaN	NaN	NaN	27.6981	26.8007	27.6975	26.8206	26.385	26.9992	27.0165	NaN	NaN	NaN	NaN	NaN	NaN	NaN	NaN	NaN	NaN	NaN	NaN	NaN	NaN	NaN	25.9994	NaN	27.194	28.4433	NaN	NaN	26.3391	NaN	26.7389	NaN
P22004	Bone morphogenetic protein 6	BMP6	NaN	NaN	24.3152	NaN	NaN	NaN	NaN	NaN	24.6296	NaN	NaN	NaN	NaN	NaN	NaN	NaN	NaN	NaN	NaN	NaN	NaN	NaN	NaN	NaN	NaN	NaN	NaN	NaN	NaN	NaN	NaN	NaN	NaN	NaN	NaN	NaN	NaN	NaN	NaN	NaN	NaN	NaN	NaN	NaN	27.0793	25.7909	25.7849
Q7Z5Y6;P34820	Bone morphogenetic protein 8A;Bone morphogenetic protein 8B	BMP8A;BMP8B	NaN	NaN	NaN	NaN	NaN	NaN	NaN	NaN	NaN	NaN	NaN	NaN	NaN	NaN	NaN	NaN	NaN	NaN	NaN	NaN	NaN	NaN	NaN	NaN	NaN	NaN	NaN	NaN	NaN	NaN	NaN	NaN	NaN	NaN	NaN	NaN	NaN	NaN	NaN	NaN	NaN	NaN	NaN	NaN	NaN	NaN	NaN
Q8N8U9	BMP-binding endothelial regulator protein	BMPER	23.5206	NaN	NaN	NaN	NaN	NaN	NaN	NaN	NaN	NaN	NaN	NaN	NaN	NaN	NaN	NaN	NaN	NaN	NaN	NaN	NaN	NaN	NaN	NaN	NaN	NaN	NaN	NaN	NaN	NaN	NaN	NaN	NaN	NaN	NaN	NaN	NaN	NaN	NaN	NaN	NaN	NaN	NaN	NaN	NaN	NaN	NaN
Q8NFC6	Biorientation of chromosomes in cell division protein 1-like 1	BOD1L1	NaN	NaN	NaN	NaN	NaN	NaN	NaN	NaN	NaN	NaN	NaN	NaN	NaN	NaN	NaN	NaN	NaN	NaN	NaN	NaN	NaN	NaN	NaN	NaN	22.0423	NaN	NaN	NaN	NaN	NaN	NaN	NaN	NaN	NaN	NaN	NaN	NaN	NaN	NaN	NaN	NaN	NaN	NaN	NaN	NaN	NaN	NaN
Q9H3K6	BolA-like protein 2	BOLA2	NaN	24.7139	NaN	NaN	NaN	NaN	NaN	NaN	NaN	NaN	NaN	NaN	NaN	NaN	NaN	NaN	NaN	NaN	NaN	NaN	NaN	NaN	NaN	NaN	NaN	NaN	NaN	NaN	NaN	NaN	NaN	NaN	NaN	NaN	NaN	NaN	NaN	NaN	NaN	NaN	NaN	NaN	NaN	NaN	NaN	NaN	NaN
P07738	Bisphosphoglycerate mutase	BPGM	NaN	NaN	NaN	NaN	NaN	NaN	NaN	NaN	NaN	NaN	23.6463	NaN	NaN	NaN	NaN	NaN	NaN	NaN	NaN	NaN	NaN	NaN	25.5004	24.4509	NaN	NaN	NaN	NaN	NaN	NaN	NaN	NaN	NaN	NaN	NaN	NaN	NaN	NaN	NaN	NaN	NaN	NaN	NaN	NaN	NaN	NaN	NaN
P17213	Bactericidal permeability-increasing protein	BPI	NaN	NaN	NaN	NaN	NaN	NaN	NaN	NaN	NaN	NaN	NaN	NaN	NaN	NaN	NaN	NaN	NaN	NaN	NaN	NaN	NaN	NaN	22.6742	NaN	NaN	NaN	NaN	NaN	NaN	NaN	NaN	NaN	NaN	NaN	NaN	NaN	NaN	NaN	NaN	NaN	NaN	NaN	NaN	NaN	NaN	NaN	NaN
Q8TDL5	BPI fold-containing family B member 1	BPIFB1	NaN	NaN	NaN	NaN	NaN	NaN	NaN	NaN	NaN	NaN	NaN	NaN	NaN	NaN	NaN	24.5291	NaN	NaN	NaN	NaN	NaN	NaN	NaN	NaN	NaN	NaN	NaN	NaN	NaN	NaN	27.7415	NaN	NaN	NaN	NaN	NaN	NaN	NaN	NaN	NaN	NaN	NaN	NaN	NaN	NaN	NaN	NaN
O95861	3(2),5-bisphosphate nucleotidase 1	BPNT1	NaN	NaN	NaN	24.6074	NaN	NaN	NaN	NaN	NaN	NaN	NaN	NaN	NaN	NaN	NaN	NaN	NaN	NaN	NaN	NaN	NaN	NaN	NaN	NaN	NaN	NaN	NaN	NaN	NaN	NaN	NaN	NaN	NaN	NaN	NaN	NaN	NaN	NaN	NaN	NaN	NaN	NaN	NaN	NaN	NaN	NaN	NaN
P46736	Lys-63-specific deubiquitinase BRCC36	BRCC3	NaN	NaN	NaN	NaN	NaN	NaN	NaN	NaN	NaN	NaN	NaN	NaN	NaN	NaN	NaN	NaN	NaN	NaN	NaN	NaN	NaN	NaN	NaN	NaN	NaN	NaN	NaN	NaN	NaN	NaN	NaN	NaN	NaN	NaN	NaN	NaN	NaN	NaN	NaN	NaN	NaN	NaN	NaN	NaN	NaN	NaN	NaN
Q8WUW1	Protein BRICK1	BRK1	NaN	NaN	NaN	NaN	24.2294	NaN	NaN	NaN	NaN	NaN	NaN	NaN	NaN	NaN	NaN	NaN	NaN	NaN	NaN	NaN	NaN	NaN	NaN	NaN	NaN	NaN	NaN	NaN	NaN	NaN	NaN	NaN	NaN	NaN	NaN	NaN	NaN	NaN	NaN	NaN	NaN	NaN	NaN	NaN	NaN	NaN	NaN
Q8TDC3	Serine/threonine-protein kinase BRSK1	BRSK1	NaN	NaN	NaN	NaN	NaN	NaN	NaN	NaN	NaN	NaN	NaN	NaN	NaN	NaN	NaN	NaN	NaN	NaN	NaN	NaN	NaN	NaN	NaN	NaN	NaN	NaN	23.276	NaN	NaN	NaN	NaN	NaN	NaN	NaN	NaN	NaN	NaN	NaN	NaN	NaN	NaN	NaN	NaN	NaN	NaN	NaN	NaN
P35613	Basigin	BSG	25.0236	26.0177	NaN	NaN	25.1416	25.0648	25.0647	NaN	NaN	NaN	NaN	26.7221	26.5875	26.7676	25.0769	26.2314	25.8264	27.2432	NaN	NaN	26.1077	25.7911	25.6064	25.2165	26.0381	26.4067	NaN	NaN	NaN	NaN	NaN	NaN	NaN	NaN	26.5895	NaN	26.9991	NaN	26.7539	NaN	NaN	NaN	NaN	25.8235	NaN	NaN	26.2901
Q10588	ADP-ribosyl cyclase/cyclic ADP-ribose hydrolase 2	BST1	23.1417	23.1251	NaN	NaN	NaN	NaN	NaN	NaN	NaN	NaN	NaN	NaN	NaN	NaN	NaN	NaN	NaN	NaN	NaN	NaN	NaN	23.2974	NaN	NaN	NaN	NaN	NaN	NaN	NaN	22.4726	NaN	NaN	22.9341	NaN	NaN	NaN	NaN	NaN	NaN	NaN	NaN	NaN	NaN	NaN	NaN	NaN	NaN
P43251	Biotinidase	BTD	24.6001	24.8964	26.9389	NaN	27.127	27.2521	28.2915	27.8007	28.4215	27.6176	28.6352	27.43	NaN	NaN	NaN	25.993	26.0154	NaN	26.1005	NaN	24.9306	24.7237	NaN	27.5291	NaN	NaN	26.3426	NaN	28.9172	27.9118	28.3098	28.1071	29.4349	26.5461	NaN	NaN	NaN	NaN	NaN	NaN	NaN	NaN	NaN	24.7937	26.8937	NaN	25.1642
P20290	Transcription factor BTF3	BTF3	NaN	NaN	NaN	NaN	NaN	NaN	NaN	NaN	NaN	NaN	NaN	NaN	NaN	NaN	NaN	NaN	NaN	NaN	NaN	NaN	NaN	NaN	NaN	NaN	NaN	NaN	NaN	NaN	NaN	NaN	NaN	NaN	NaN	NaN	NaN	NaN	NaN	NaN	NaN	NaN	NaN	NaN	NaN	NaN	NaN	NaN	NaN
Q96K17	Transcription factor BTF3 homolog 4	BTF3L4	24.566	24.8444	NaN	NaN	NaN	NaN	NaN	NaN	NaN	NaN	NaN	NaN	NaN	NaN	NaN	NaN	NaN	NaN	NaN	NaN	NaN	NaN	24.4667	NaN	NaN	NaN	NaN	NaN	NaN	NaN	NaN	NaN	NaN	NaN	NaN	NaN	NaN	NaN	NaN	NaN	NaN	NaN	NaN	NaN	NaN	NaN	NaN
O43684	Mitotic checkpoint protein BUB3	BUB3	NaN	24.5897	NaN	NaN	NaN	NaN	NaN	NaN	NaN	NaN	NaN	NaN	NaN	NaN	NaN	NaN	NaN	NaN	NaN	NaN	NaN	NaN	NaN	NaN	NaN	NaN	NaN	NaN	NaN	NaN	NaN	NaN	NaN	NaN	NaN	NaN	NaN	NaN	NaN	NaN	NaN	NaN	NaN	NaN	NaN	NaN	NaN
P41223	Protein BUD31 homolog	BUD31	NaN	NaN	NaN	20.7394	NaN	NaN	NaN	NaN	NaN	NaN	NaN	NaN	NaN	NaN	NaN	NaN	NaN	NaN	NaN	NaN	NaN	NaN	NaN	NaN	NaN	NaN	NaN	NaN	NaN	NaN	NaN	NaN	NaN	NaN	NaN	NaN	NaN	NaN	NaN	NaN	NaN	NaN	NaN	NaN	NaN	NaN	NaN
Q7L1Q6	Basic leucine zipper and W2 domain-containing protein 1	BZW1	NaN	NaN	NaN	NaN	NaN	NaN	NaN	NaN	NaN	NaN	NaN	NaN	NaN	NaN	NaN	NaN	NaN	NaN	NaN	NaN	NaN	NaN	NaN	NaN	NaN	NaN	NaN	NaN	NaN	NaN	NaN	NaN	NaN	NaN	NaN	NaN	NaN	NaN	NaN	NaN	NaN	NaN	NaN	NaN	NaN	NaN	NaN
Q9Y6E2	Basic leucine zipper and W2 domain-containing protein 2	BZW2	NaN	NaN	NaN	22.2128	NaN	NaN	NaN	NaN	NaN	NaN	NaN	NaN	NaN	NaN	NaN	NaN	NaN	NaN	NaN	NaN	NaN	NaN	NaN	NaN	NaN	NaN	NaN	NaN	NaN	NaN	NaN	NaN	NaN	NaN	NaN	NaN	NaN	NaN	NaN	NaN	NaN	NaN	NaN	NaN	NaN	NaN	NaN
Q9H0W9	Ester hydrolase C11orf54	C11orf54	24.9558	23.6799	NaN	25.2125	NaN	NaN	NaN	NaN	NaN	NaN	NaN	NaN	NaN	NaN	NaN	NaN	NaN	NaN	NaN	NaN	NaN	NaN	NaN	NaN	NaN	NaN	NaN	NaN	NaN	NaN	NaN	NaN	NaN	NaN	NaN	NaN	NaN	NaN	NaN	NaN	NaN	NaN	NaN	NaN	NaN	NaN	NaN
Q9H3H3	UPF0696 protein C11orf68	C11orf68	24.3025	23.7533	NaN	24.9086	NaN	NaN	NaN	NaN	NaN	NaN	NaN	NaN	NaN	NaN	NaN	NaN	NaN	NaN	NaN	NaN	NaN	NaN	NaN	NaN	NaN	NaN	NaN	NaN	NaN	NaN	NaN	NaN	NaN	NaN	NaN	NaN	NaN	NaN	NaN	NaN	NaN	NaN	NaN	NaN	NaN	NaN	NaN
Q53FT3	Protein Hikeshi	C11orf73	NaN	NaN	NaN	NaN	NaN	NaN	NaN	NaN	NaN	NaN	NaN	NaN	NaN	NaN	NaN	NaN	NaN	NaN	NaN	NaN	NaN	NaN	NaN	NaN	NaN	NaN	NaN	NaN	NaN	NaN	NaN	NaN	NaN	NaN	NaN	NaN	NaN	NaN	NaN	NaN	NaN	NaN	NaN	NaN	NaN	NaN	NaN
Q9HB07	UPF0160 protein MYG1, mitochondrial	C12orf10	NaN	NaN	NaN	22.9784	NaN	NaN	NaN	NaN	NaN	NaN	NaN	NaN	NaN	NaN	NaN	NaN	NaN	NaN	NaN	NaN	NaN	NaN	NaN	NaN	NaN	NaN	NaN	NaN	NaN	NaN	NaN	NaN	NaN	NaN	NaN	NaN	NaN	NaN	NaN	NaN	NaN	NaN	NaN	NaN	NaN	NaN	NaN
Q9Y224	UPF0568 protein C14orf166	C14orf166	NaN	24.5904	NaN	23.6897	NaN	NaN	NaN	NaN	NaN	NaN	NaN	NaN	NaN	NaN	NaN	NaN	NaN	NaN	NaN	NaN	NaN	NaN	NaN	NaN	NaN	NaN	NaN	NaN	NaN	NaN	NaN	NaN	NaN	NaN	NaN	NaN	NaN	NaN	NaN	NaN	NaN	NaN	NaN	NaN	NaN	NaN	NaN
Q96S19	UPF0585 protein C16orf13	C16orf13	NaN	NaN	NaN	NaN	NaN	NaN	NaN	NaN	NaN	NaN	NaN	NaN	NaN	NaN	NaN	NaN	NaN	NaN	NaN	NaN	NaN	NaN	NaN	NaN	NaN	NaN	NaN	NaN	NaN	NaN	NaN	NaN	NaN	NaN	NaN	NaN	NaN	NaN	NaN	NaN	NaN	NaN	25.6879	NaN	NaN	NaN	NaN
Q2M2W7	UPF0450 protein C17orf58	C17orf58	NaN	NaN	NaN	NaN	NaN	NaN	NaN	NaN	NaN	NaN	NaN	NaN	NaN	NaN	NaN	NaN	NaN	NaN	NaN	NaN	NaN	NaN	NaN	NaN	22.3331	NaN	NaN	NaN	NaN	NaN	NaN	NaN	NaN	NaN	NaN	NaN	NaN	NaN	NaN	NaN	NaN	NaN	NaN	NaN	NaN	NaN	NaN
Q9NWV4	UPF0587 protein C1orf123	C1orf123	26.6648	26.3921	NaN	26.5618	NaN	NaN	NaN	NaN	NaN	NaN	NaN	NaN	NaN	NaN	NaN	NaN	NaN	NaN	NaN	NaN	NaN	NaN	25.3524	NaN	NaN	24.1314	NaN	NaN	NaN	NaN	NaN	NaN	NaN	25.3569	NaN	NaN	NaN	NaN	NaN	NaN	NaN	NaN	NaN	NaN	NaN	NaN	NaN
Q13536	Protein CROC-4	C1orf61	NaN	NaN	NaN	NaN	NaN	NaN	NaN	NaN	NaN	NaN	NaN	NaN	NaN	NaN	NaN	NaN	NaN	NaN	NaN	NaN	NaN	NaN	NaN	NaN	NaN	NaN	NaN	NaN	NaN	NaN	NaN	NaN	NaN	NaN	NaN	NaN	NaN	NaN	NaN	NaN	NaN	NaN	NaN	NaN	NaN	NaN	NaN
P02745	Complement C1q subcomponent subunit A	C1QA	NaN	24.7813	27.4615	NaN	30.4779	29.241	27.6828	27.7597	25.1738	27.4778	28.5082	27.1622	NaN	NaN	NaN	NaN	NaN	NaN	NaN	NaN	NaN	NaN	27.0721	25.4629	28.3338	NaN	NaN	NaN	26.666	26.0994	28.4958	NaN	27.7933	NaN	NaN	NaN	NaN	NaN	NaN	NaN	NaN	NaN	NaN	NaN	NaN	NaN	24.3564
P02746	Complement C1q subcomponent subunit B	C1QB	26.8553	29.4821	30.5644	26.9391	29.0767	31.1449	28.2888	31.8715	29.0507	28.2838	29.081	30.9544	NaN	NaN	NaN	NaN	NaN	NaN	NaN	NaN	NaN	25.7001	26.8174	26.5891	28.3834	27.6761	NaN	26.1743	27.5884	NaN	29.2733	26.75	27.3265	NaN	26.5865	NaN	NaN	NaN	NaN	NaN	NaN	NaN	NaN	NaN	27.8179	NaN	26.5024
Q07021	Complement component 1 Q subcomponent-binding protein, mitochondrial	C1QBP	26.7155	27.0189	NaN	27.9878	NaN	NaN	NaN	NaN	NaN	NaN	NaN	NaN	23.5105	23.4923	NaN	NaN	NaN	NaN	NaN	NaN	NaN	NaN	25.6919	NaN	NaN	NaN	NaN	NaN	NaN	NaN	NaN	NaN	NaN	24.4681	NaN	NaN	NaN	NaN	NaN	NaN	NaN	NaN	NaN	NaN	NaN	24.9749	NaN
P02747	Complement C1q subcomponent subunit C	C1QC	28.3121	29.3334	30.7656	26.3175	30.1183	31.2269	29.3143	31.6022	29.9956	28.7173	29.4548	31.597	24.7622	NaN	NaN	NaN	28.0775	NaN	NaN	NaN	NaN	NaN	28.2813	27.4221	28.7405	27.9465	25.775	NaN	28.075	26.7922	28.7759	27.5144	26.3058	NaN	NaN	NaN	NaN	NaN	NaN	NaN	NaN	NaN	NaN	NaN	NaN	NaN	28.0103
Q9BXJ1	Complement C1q tumor necrosis factor-related protein 1	C1QTNF1	NaN	NaN	NaN	NaN	NaN	NaN	NaN	NaN	NaN	NaN	NaN	NaN	NaN	NaN	NaN	NaN	NaN	NaN	NaN	NaN	NaN	NaN	NaN	NaN	NaN	NaN	NaN	NaN	NaN	NaN	NaN	NaN	NaN	NaN	NaN	NaN	NaN	NaN	NaN	NaN	NaN	NaN	NaN	NaN	NaN	NaN	NaN
Q9BXJ4	Complement C1q tumor necrosis factor-related protein 3	C1QTNF3	NaN	NaN	NaN	NaN	NaN	NaN	NaN	NaN	NaN	NaN	NaN	NaN	NaN	NaN	NaN	NaN	NaN	NaN	NaN	NaN	28.8532	NaN	NaN	NaN	NaN	NaN	NaN	NaN	NaN	NaN	NaN	NaN	NaN	NaN	NaN	NaN	NaN	NaN	NaN	NaN	NaN	NaN	NaN	NaN	NaN	NaN	NaN
Q9BXJ0	Complement C1q tumor necrosis factor-related protein 5	C1QTNF5	25.1213	26.0212	NaN	NaN	24.1736	NaN	24.1085	NaN	NaN	NaN	NaN	NaN	26.8851	26.2198	26.3255	NaN	NaN	NaN	NaN	NaN	NaN	NaN	25.0385	24.8648	NaN	24.8424	NaN	NaN	24.5434	25.6395	26.8514	NaN	NaN	NaN	26.3117	NaN	NaN	NaN	NaN	NaN	NaN	NaN	NaN	NaN	24.906	26.3649	NaN
Q9BXJ2	Complement C1q tumor necrosis factor-related protein 7	C1QTNF7	NaN	NaN	NaN	NaN	NaN	NaN	NaN	NaN	NaN	NaN	NaN	NaN	24.5267	NaN	NaN	NaN	NaN	NaN	NaN	NaN	NaN	NaN	NaN	NaN	NaN	NaN	NaN	NaN	NaN	NaN	NaN	NaN	NaN	NaN	NaN	NaN	NaN	NaN	NaN	NaN	NaN	NaN	NaN	NaN	NaN	NaN	NaN
P60827	Complement C1q tumor necrosis factor-related protein 8	C1QTNF8	NaN	NaN	NaN	NaN	NaN	NaN	NaN	NaN	NaN	NaN	NaN	NaN	NaN	NaN	NaN	NaN	NaN	NaN	NaN	NaN	NaN	NaN	NaN	NaN	NaN	NaN	NaN	NaN	NaN	NaN	NaN	NaN	NaN	NaN	NaN	NaN	NaN	NaN	NaN	NaN	NaN	NaN	NaN	NaN	NaN	NaN	NaN
P00736	Complement C1r subcomponent;Complement C1r subcomponent heavy chain;Complement C1r subcomponent light chain	C1R	29.0168	29.7824	30.9454	28.6838	31.1706	31.2802	30.5349	31.0877	31.1363	30.403	31.0948	30.2916	28.5696	29.569	27.781	29.6161	29.5	29.5914	30.1074	29.8208	30.0599	29.722	29.0541	29.1556	29.7037	29.2829	29.5054	29.6743	30.2316	29.7067	31.1122	30.4287	31.028	27.6841	29.231	27.8966	28.2558	28.6552	30.338	29.7164	30.0669	29.7783	30.9052	30.161	28.9266	29.3264	29.6251
Q9NZP8	Complement C1r subcomponent-like protein	C1RL	24.1031	24.1994	NaN	25.1005	28.0964	26.6514	27.8502	26.4028	28.0575	NaN	26.966	25.8331	NaN	NaN	NaN	25.9103	NaN	NaN	NaN	NaN	NaN	NaN	NaN	26.4717	NaN	26.2768	25.6485	NaN	27.5497	24.9085	NaN	NaN	28.1567	NaN	NaN	NaN	NaN	NaN	NaN	NaN	23.5039	NaN	26.2853	NaN	NaN	26.6112	25.7401
P09871	Complement C1s subcomponent;Complement C1s subcomponent heavy chain;Complement C1s subcomponent light chain	C1S	29.3281	30.0095	31.3081	29.1247	31.5522	31.6781	31.6281	31.8327	31.7053	31.7906	31.6728	31.2031	30.1512	30.7918	29.3808	31.4182	31.5594	31.8035	32.331	31.8098	32.5998	32.1112	29.933	30.3188	29.7414	30.6369	31.6861	31.7777	31.2707	31.3994	31.4714	31.5817	31.7667	29.029	30.3585	30.5141	29.4246	31.6171	31.7393	31.9049	32.301	31.9523	31.817	31.8954	30.539	31.3147	31.4742
P06681	Complement C2;Complement C2b fragment;Complement C2a fragment	C2	28.4518	30.3618	30.0958	28.6336	31.0493	31.0804	31.5054	30.9433	31.09	30.8398	30.9251	29.4235	25.4136	NaN	23.1712	25.8588	NaN	24.7152	24.9264	26.0106	22.9597	26.9226	27.877	28.5236	29.3517	24.8164	30.1082	28.5398	30.7953	29.4303	30.9527	29.577	30.6396	23.5109	23.4344	29.0825	25.7079	23.7862	NaN	26.268	24.805	26.9784	25.8182	NaN	NaN	25.368	26.6675
Q9GZN8	UPF0687 protein C20orf27	C20orf27	23.118	NaN	NaN	NaN	NaN	NaN	NaN	NaN	NaN	NaN	NaN	NaN	NaN	NaN	NaN	NaN	NaN	NaN	NaN	NaN	NaN	NaN	NaN	NaN	NaN	NaN	NaN	NaN	NaN	NaN	NaN	NaN	NaN	NaN	NaN	NaN	NaN	NaN	NaN	NaN	NaN	NaN	NaN	NaN	NaN	NaN	NaN
Q9H1Z8	Augurin	C2orf40	NaN	NaN	NaN	NaN	NaN	25.7367	NaN	NaN	NaN	25.1929	NaN	27.0828	27.1804	29.172	24.9287	NaN	26.2072	NaN	26.0581	NaN	NaN	NaN	25.8984	26.3696	NaN	27.0594	26.9077	NaN	26.2291	27.6365	NaN	NaN	NaN	27.2327	NaN	30.0279	27.9288	27.7231	28.7677	NaN	24.5569	26.5186	26.7585	NaN	28.3928	26.9644	27.9167
P01024	Complement C3;Complement C3 beta chain;C3-beta-c;Complement C3 alpha chain;C3a anaphylatoxin;Acylation stimulating protein;Complement C3b alpha chain;Complement C3c alpha chain fragment 1;Complement C3dg fragment;Complement C3g fragment;Complement C3d fragment;Complement C3f fragment;Complement C3c alpha chain fragment 2	C3	34.7634	35.4605	36.023	33.9731	37.1778	36.8267	37.5175	36.9626	36.8378	36.8906	37.6552	36.306	33.3177	33.0409	32.5277	33.115	32.4542	33.2887	32.414	34.404	33.8673	32.5732	34.4915	34.9174	35.327	34.5782	35.648	35.4025	36.6804	36.4905	36.2343	36.0213	36.6777	32.749	33.037	33.5755	33.4616	32.601	34.739	34.344	34.304	33.6317	33.3005	33.9105	33.2773	34.0337	34.4829
Q8NDZ4	Deleted in autism protein 1	C3orf58	NaN	NaN	NaN	NaN	NaN	NaN	NaN	NaN	NaN	NaN	NaN	NaN	NaN	NaN	NaN	NaN	NaN	NaN	NaN	NaN	NaN	NaN	NaN	NaN	NaN	NaN	NaN	NaN	NaN	NaN	NaN	NaN	NaN	NaN	NaN	NaN	NaN	NaN	NaN	NaN	NaN	NaN	NaN	NaN	NaN	NaN	NaN
P0C0L4	Complement C4-A;Complement C4 beta chain;Complement C4-A alpha chain;C4a anaphylatoxin;C4b-A;C4d-A;Complement C4 gamma chain	C4A	NaN	29.3538	29.783	27.5024	29.8803	30.3156	30.6812	30.621	30.843	29.7295	30.6508	30.3934	NaN	NaN	NaN	NaN	NaN	27.4091	NaN	NaN	NaN	NaN	NaN	28.124	30.0066	NaN	NaN	NaN	29.528	29.2871	30.3685	28.9528	30.4059	NaN	NaN	NaN	NaN	NaN	NaN	NaN	NaN	NaN	NaN	NaN	NaN	28.184	28.9394
P0C0L5	Complement C4-B;Complement C4 beta chain;Complement C4-B alpha chain;C4a anaphylatoxin;C4b-B;C4d-B;Complement C4 gamma chain	C4B	32.3076	33.386	33.7178	31.952	34.9603	34.5166	34.8228	34.7822	34.6146	34.1827	35.2241	33.1366	30.5007	30.8826	29.5758	30.9583	30.4667	31.3244	31.4109	31.3566	31.4207	31.2635	31.6517	31.4991	32.6101	31.4094	31.3221	32.0603	34.082	33.6236	34.1931	32.9265	34.6263	30.0215	30.4723	30.5696	31.0719	30.4473	31.3875	30.8935	31.2988	31.0859	31.4534	31.3944	30.6244	30.9517	32.0305
P04003	C4b-binding protein alpha chain	C4BPA	30.1669	31.684	32.93	30.7591	32.6467	32.2529	31.1858	31.9907	32.1863	31.3501	32.3571	31.596	24.9266	NaN	NaN	22.6484	NaN	22.9668	NaN	24.0522	22.9424	24.2143	29.6354	29.2935	32.6827	29.851	26.4286	28.0137	30.8595	30.0712	32.3806	30.0531	32.2365	26.5766	24.3209	26.7285	24.0542	23.5158	NaN	NaN	NaN	NaN	NaN	NaN	24.6119	25.8387	30.2764
P20851	C4b-binding protein beta chain	C4BPB	25.4587	26.6632	27.1901	24.8025	26.5905	26.9018	25.437	27.4499	27.2814	27.7432	26.4094	25.5815	NaN	NaN	NaN	NaN	NaN	NaN	NaN	NaN	NaN	NaN	NaN	NaN	27.6464	NaN	NaN	NaN	25.7343	NaN	27.1686	NaN	26.773	NaN	NaN	NaN	NaN	NaN	NaN	NaN	NaN	NaN	NaN	NaN	NaN	NaN	NaN
P01031	Complement C5;Complement C5 beta chain;Complement C5 alpha chain;C5a anaphylatoxin;Complement C5 alpha chain	C5	28.9886	31.273	34.2559	27.3122	33.821	33.8709	32.6991	33.0622	34.084	31.7041	33.5975	32.0018	21.4994	23.2057	22.9125	22.9609	NaN	24.0155	21.6932	19.352	NaN	22.4485	28.1893	30.4391	31.5003	29.8689	27.8483	29.9606	33.687	31.4704	35.1808	31.3085	34.4537	24.5308	23.599	24.3401	24.3213	24.0261	22.9419	22.842	21.2697	24.5797	23.9346	22.0925	22.6696	24.9938	31.3366
P13671	Complement component C6	C6	29.4038	30.5939	32.2875	29.2478	32.5558	32.5036	32.3683	32.0954	33.2984	31.2763	32.8122	30.295	25.7561	23.6662	24.9336	25.5664	24.3681	24.976	NaN	25.5256	24.6034	24.9557	28.8465	30.1046	30.3684	29.2308	29.5228	29.9647	32.8266	31.4884	33.8516	30.7916	33.2868	25.4193	22.2695	25.7615	24.9865	26.958	27.08	26.8815	26.2255	27.7173	26.5645	25.8505	26.8891	27.755	29.8912
P10643	Complement component C7	C7	29.8689	30.582	32.948	29.6348	32.5986	32.9265	32.7094	32.4649	33.4579	31.9096	33.1786	30.6923	NaN	NaN	NaN	24.8597	NaN	NaN	24.2497	26.2021	23.8306	24.1615	28.3021	29.9566	30.5654	29.3985	29.4589	30.0299	33.0059	31.6038	33.8952	31.0695	33.5248	24.0943	NaN	NaN	NaN	25.504	NaN	NaN	25.8858	NaN	25.8739	NaN	22.62	28.5019	30.512
P07357	Complement component C8 alpha chain	C8A	28.8005	29.9924	31.857	28.9498	32.1245	32.6236	31.2109	31.9192	32.7824	31.0881	32.3848	25.4393	25.3117	22.613	NaN	NaN	NaN	21.2913	NaN	NaN	NaN	22.0742	28.8554	29.5617	29.0166	28.4477	30.3211	29.35	32.143	30.4159	33.092	29.5631	32.4827	26.517	23.6327	NaN	NaN	NaN	NaN	NaN	22.4644	NaN	17.8832	23.6972	22.223	28.3242	29.5555
P07358	Complement component C8 beta chain	C8B	29.3811	30.602	31.7333	29.0914	32.6204	32.8682	32.4007	32.6577	33.423	30.9604	33.0086	30.6432	25.9011	24.4757	22.124	21.2621	NaN	25.8375	22.0399	23.2578	22.6382	22.1691	29.1258	30.7778	29.7395	29.1602	31.3223	28.8046	33.4518	31.5381	34.0216	30.699	33.4918	25.9027	20.9638	22.3808	25.7638	25.7099	24.0058	NaN	25.4092	26.1968	25.9876	22.4779	24.7583	27.6503	29.4756
P07360	Complement component C8 gamma chain	C8G	29.5592	29.778	31.7625	29.5159	31.5123	32.4831	32.0906	32.4085	32.6702	31.3115	32.6315	31.374	26.7038	23.6347	26.5418	23.2836	NaN	24.9157	NaN	24.1383	NaN	NaN	29.2843	29.9527	30.0721	28.9689	30.1208	30.059	32.4016	30.7446	33.1802	29.7883	32.7266	26.8894	NaN	NaN	25.5661	23.9103	24.2806	NaN	NaN	NaN	NaN	NaN	26.5731	28.2864	29.465
P02748	Complement component C9;Complement component C9a;Complement component C9b	C9	30.921	31.9816	35.8425	30.8452	34.7502	35.6984	33.2895	34.6675	35.3923	33.3696	35.0198	32.3051	26.437	25.6358	26.1928	21.5078	NaN	23.7923	25.5879	25.016	23.9608	22.7058	31.339	34.4745	33.1778	31.4707	31.2501	31.9199	34.6073	32.8383	35.5982	31.7621	35.023	26.6356	23.984	NaN	24.4617	NaN	23.5097	22.9842	24.9821	19.3473	23.0211	23.6237	27.75	31.7124	34.1219
Q9BUH6	Protein PAXX	C9orf142	NaN	NaN	NaN	NaN	NaN	NaN	NaN	NaN	NaN	NaN	NaN	NaN	NaN	NaN	NaN	NaN	NaN	NaN	NaN	NaN	NaN	NaN	NaN	NaN	NaN	NaN	NaN	NaN	NaN	NaN	NaN	NaN	NaN	NaN	NaN	NaN	NaN	NaN	NaN	NaN	NaN	NaN	NaN	NaN	NaN	NaN	NaN
Q5T6V5	UPF0553 protein C9orf64	C9orf64	NaN	22.5778	NaN	NaN	NaN	NaN	NaN	NaN	NaN	NaN	NaN	NaN	22.699	NaN	22.4699	NaN	NaN	NaN	NaN	NaN	NaN	NaN	NaN	NaN	NaN	NaN	NaN	NaN	NaN	NaN	NaN	NaN	NaN	NaN	NaN	NaN	NaN	NaN	NaN	NaN	NaN	NaN	NaN	NaN	NaN	NaN	NaN
P00915	Carbonic anhydrase 1	CA1	30.0297	31.1682	29.4254	29.9328	26.9321	26.6039	25.3764	NaN	24.3411	25.9021	25.2859	25.6573	28.9768	29.6103	28.5513	NaN	NaN	26.6098	NaN	NaN	23.5028	25.7806	31.0271	28.2352	29.8952	26.7452	27.4086	NaN	25.74	22.2341	25.6862	NaN	22.5598	29.3326	28.1158	28.5069	29.0988	26.5796	NaN	28.3681	25.7606	27.0016	26.8146	NaN	30.0737	29.0317	28.4328
P00918	Carbonic anhydrase 2	CA2	29.6921	28.9035	27.8271	30.1898	NaN	24.7655	25.4918	NaN	NaN	26.6398	NaN	NaN	27.1337	27.8036	26.4274	24.5871	NaN	NaN	25.0945	NaN	25.3554	NaN	29.0577	27.3976	28.1047	26.9673	NaN	NaN	25.3017	25.82	NaN	NaN	26.5982	28.2646	NaN	26.412	26.9649	26.3503	NaN	24.6443	NaN	NaN	NaN	NaN	29.7437	27.754	26.5626
P07451	Carbonic anhydrase 3	CA3	34.7577	30.7102	NaN	35.217	27.1845	21.4915	25.2702	NaN	NaN	NaN	24.8824	28.7352	30.7017	28.6578	31.1478	28.8572	29.8295	29.7601	29.3302	26.9378	27.6548	29.0542	31.9711	29.2174	25.6057	30.4156	26.8979	NaN	22.2632	23.3504	NaN	23.8007	NaN	31.7933	28.0665	26.2135	31.3509	29.2893	28.6643	28.9236	27.5024	28.4017	24.4775	28.1388	29.9289	27.6867	NaN
Q9Y2D0	Carbonic anhydrase 5B, mitochondrial	CA5B	NaN	NaN	NaN	NaN	NaN	NaN	NaN	NaN	NaN	NaN	NaN	NaN	NaN	NaN	NaN	NaN	NaN	NaN	NaN	NaN	NaN	NaN	NaN	NaN	NaN	NaN	NaN	NaN	NaN	NaN	NaN	NaN	NaN	NaN	NaN	NaN	NaN	NaN	NaN	NaN	NaN	NaN	NaN	NaN	NaN	NaN	NaN
Q16790	Carbonic anhydrase 9	CA9	NaN	NaN	NaN	NaN	23.5156	NaN	NaN	NaN	NaN	NaN	NaN	24.0518	NaN	NaN	NaN	NaN	NaN	NaN	NaN	NaN	NaN	NaN	NaN	24.8315	NaN	NaN	NaN	NaN	NaN	NaN	NaN	NaN	NaN	NaN	NaN	NaN	NaN	NaN	NaN	NaN	NaN	NaN	NaN	NaN	NaN	NaN	NaN
Q9Y376	Calcium-binding protein 39	CAB39	24.1185	24.092	NaN	24.4246	NaN	NaN	NaN	NaN	NaN	NaN	NaN	NaN	NaN	NaN	NaN	NaN	NaN	NaN	NaN	NaN	NaN	NaN	NaN	NaN	NaN	NaN	NaN	NaN	NaN	NaN	NaN	NaN	NaN	NaN	NaN	NaN	NaN	NaN	NaN	NaN	NaN	NaN	NaN	NaN	NaN	NaN	NaN
P54289	Voltage-dependent calcium channel subunit alpha-2/delta-1;Voltage-dependent calcium channel subunit alpha-2-1;Voltage-dependent calcium channel subunit delta-1	CACNA2D1	NaN	NaN	NaN	25.0747	NaN	NaN	NaN	NaN	NaN	NaN	NaN	NaN	NaN	NaN	NaN	NaN	NaN	NaN	NaN	NaN	NaN	NaN	NaN	NaN	NaN	NaN	NaN	NaN	NaN	NaN	NaN	NaN	NaN	NaN	NaN	NaN	NaN	NaN	NaN	NaN	NaN	NaN	NaN	NaN	NaN	NaN	NaN
Q9HB71	Calcyclin-binding protein	CACYBP	24.88	NaN	NaN	24.1912	NaN	NaN	NaN	NaN	NaN	NaN	NaN	NaN	NaN	NaN	NaN	NaN	NaN	NaN	NaN	NaN	NaN	NaN	NaN	NaN	NaN	NaN	NaN	NaN	NaN	NaN	NaN	NaN	NaN	NaN	NaN	NaN	NaN	NaN	NaN	NaN	NaN	NaN	NaN	NaN	NaN	NaN	NaN
Q9BY67	Cell adhesion molecule 1	CADM1	NaN	NaN	NaN	NaN	NaN	NaN	NaN	NaN	NaN	NaN	NaN	NaN	NaN	NaN	NaN	NaN	NaN	NaN	NaN	NaN	NaN	NaN	23.9449	NaN	NaN	NaN	NaN	NaN	NaN	NaN	NaN	NaN	NaN	NaN	NaN	NaN	NaN	NaN	NaN	NaN	NaN	NaN	NaN	NaN	NaN	NaN	NaN
Q8NFZ8	Cell adhesion molecule 4	CADM4	NaN	NaN	NaN	NaN	NaN	NaN	NaN	NaN	NaN	NaN	NaN	NaN	NaN	NaN	NaN	NaN	NaN	NaN	NaN	NaN	NaN	NaN	NaN	NaN	NaN	NaN	NaN	NaN	NaN	NaN	NaN	NaN	NaN	NaN	NaN	NaN	NaN	NaN	NaN	NaN	NaN	NaN	NaN	NaN	NaN	NaN	NaN
P22676	Calretinin	CALB2	NaN	NaN	NaN	NaN	NaN	NaN	NaN	NaN	NaN	NaN	NaN	NaN	NaN	NaN	NaN	NaN	NaN	NaN	NaN	NaN	NaN	NaN	NaN	NaN	NaN	NaN	NaN	NaN	NaN	NaN	NaN	NaN	NaN	NaN	NaN	NaN	NaN	NaN	NaN	NaN	NaN	NaN	NaN	NaN	NaN	NaN	NaN
Q05682	Caldesmon	CALD1	27.5421	28.1664	NaN	28.1663	NaN	NaN	NaN	NaN	NaN	NaN	NaN	NaN	26.7221	NaN	26.611	NaN	NaN	NaN	NaN	NaN	NaN	NaN	27.8016	NaN	NaN	NaN	NaN	NaN	NaN	NaN	NaN	NaN	NaN	28.1341	26.6589	NaN	28.0518	NaN	NaN	NaN	NaN	NaN	NaN	26.5677	NaN	NaN	NaN
Q9NZT1	Calmodulin-like protein 5	CALML5	NaN	NaN	NaN	NaN	NaN	NaN	NaN	NaN	NaN	NaN	NaN	NaN	NaN	NaN	26.7779	NaN	NaN	NaN	NaN	NaN	NaN	NaN	NaN	NaN	NaN	NaN	NaN	NaN	NaN	NaN	NaN	NaN	NaN	NaN	NaN	NaN	NaN	NaN	NaN	NaN	NaN	NaN	NaN	NaN	NaN	NaN	NaN
P27797	Calreticulin	CALR	31.3035	31.6201	27.0965	30.6337	26.2109	27.5654	26.3203	NaN	24.8122	NaN	26.0316	28.9271	30.0307	28.8162	28.1808	27.7069	26.657	27.757	NaN	27.2561	NaN	25.1269	31.0678	29.6542	28.239	28.179	28.901	26.8055	26.5654	27.2454	26.4693	25.9011	24.7946	29.5772	29.2845	24.5186	29.1519	27.406	27.9618	25.43	23.6581	26.7093	27.0727	24.9221	29.148	29.728	29.4074
O43852	Calumenin	CALU	29.2435	29.8212	26.5822	29.9015	26.6204	26.8483	27.114	25.8889	26.8903	27.3605	25.7432	29.278	29.621	30.1835	29.5126	29.953	30.518	29.6217	30.0069	29.6239	29.356	29.9841	28.8889	28.101	27.6322	29.2701	28.1679	28.4402	27.4671	27.2238	NaN	27.3371	25.0868	28.9963	29.4559	29.1119	30.1136	30.658	30.7879	29.8995	29.6675	30.5554	30.5228	28.801	28.4532	28.7987	29.1252
Q8IU85;Q14012	Calcium/calmodulin-dependent protein kinase type 1D;Calcium/calmodulin-dependent protein kinase type 1	CAMK1D;CAMK1	NaN	NaN	NaN	NaN	NaN	NaN	NaN	NaN	NaN	NaN	NaN	NaN	NaN	NaN	NaN	NaN	NaN	NaN	NaN	NaN	NaN	NaN	NaN	NaN	NaN	NaN	NaN	NaN	NaN	NaN	NaN	NaN	NaN	NaN	NaN	NaN	NaN	NaN	NaN	NaN	NaN	NaN	NaN	NaN	NaN	NaN	NaN
Q9UQM7	Calcium/calmodulin-dependent protein kinase type II subunit alpha	CAMK2A	NaN	NaN	NaN	23.8629	NaN	NaN	NaN	NaN	NaN	NaN	NaN	NaN	NaN	NaN	NaN	NaN	NaN	NaN	NaN	NaN	NaN	NaN	NaN	NaN	NaN	NaN	NaN	NaN	NaN	NaN	NaN	NaN	NaN	NaN	NaN	NaN	NaN	NaN	NaN	NaN	NaN	NaN	NaN	NaN	NaN	NaN	NaN
Q13557	Calcium/calmodulin-dependent protein kinase type II subunit delta	CAMK2D	25.1516	25.2698	NaN	25.6859	NaN	NaN	NaN	NaN	NaN	NaN	NaN	NaN	NaN	NaN	NaN	NaN	NaN	24.9494	NaN	NaN	NaN	NaN	24.8872	NaN	NaN	NaN	NaN	NaN	NaN	NaN	NaN	NaN	NaN	NaN	NaN	NaN	NaN	NaN	NaN	NaN	NaN	NaN	NaN	NaN	NaN	25.3366	NaN
P49913	Cathelicidin antimicrobial peptide;Antibacterial protein FALL-39;Antibacterial protein LL-37	CAMP	NaN	NaN	NaN	NaN	NaN	NaN	NaN	NaN	NaN	NaN	NaN	NaN	NaN	NaN	NaN	NaN	NaN	NaN	NaN	NaN	NaN	NaN	NaN	NaN	NaN	NaN	NaN	NaN	NaN	NaN	NaN	NaN	NaN	NaN	NaN	NaN	NaN	NaN	NaN	NaN	NaN	NaN	NaN	NaN	NaN	NaN	NaN
Q86VP6	Cullin-associated NEDD8-dissociated protein 1	CAND1	26.7035	28.3395	25.2743	25.1058	25.3258	24.5268	24.2916	NaN	NaN	NaN	23.5816	24.0283	25.247	24.0723	23.8133	25.5877	26.0124	NaN	NaN	NaN	NaN	23.7114	25.5836	NaN	NaN	24.8543	NaN	NaN	23.8677	NaN	25.2624	NaN	25.0406	25.6792	NaN	NaN	NaN	NaN	NaN	NaN	NaN	NaN	NaN	NaN	23.3095	NaN	24.5519
P27824	Calnexin	CANX	29.762	29.8593	25.4787	28.7378	NaN	23.209	23.2461	26.5593	NaN	NaN	NaN	26.4485	26.3609	26.984	26.714	24.5802	NaN	24.9242	25.1934	26.0265	24.7887	25.9798	27.8489	25.9683	27.0328	26.2815	NaN	NaN	25.3143	NaN	NaN	NaN	NaN	27.7381	25.7401	27.3843	27.7528	NaN	NaN	NaN	NaN	27.3614	25.3845	26.5143	NaN	24.5048	NaN
Q01518	Adenylyl cyclase-associated protein 1	CAP1	30.4148	30.6183	27.9067	30.8322	24.7492	26.7235	NaN	26.2448	26.6756	NaN	23.5062	26.4314	27.4693	26.8286	26.9842	24.2493	24.6821	24.1856	NaN	NaN	NaN	24.6186	29.5096	26.3728	27.8488	27.0419	23.5591	NaN	22.7134	23.3982	26.8385	25.319	24.4989	27.7724	27.3893	NaN	27.9311	25.4095	NaN	NaN	23.2909	NaN	22.7986	26.0063	27.0546	27.784	26.4526
P40123	Adenylyl cyclase-associated protein 2	CAP2	24.1608	23.2815	NaN	25.8541	NaN	NaN	NaN	NaN	NaN	NaN	NaN	NaN	NaN	NaN	NaN	NaN	NaN	NaN	NaN	NaN	NaN	NaN	NaN	NaN	NaN	NaN	NaN	NaN	NaN	NaN	NaN	NaN	NaN	NaN	NaN	NaN	NaN	NaN	NaN	NaN	NaN	NaN	NaN	NaN	NaN	NaN	NaN
P40121	Macrophage-capping protein	CAPG	28.7297	30.0156	27.704	29.0404	26.297	26.6663	23.2544	24.633	26.0481	26.2429	25.8127	26.8342	28.1521	27.974	27.6551	26.6333	25.354	26.6765	NaN	27.945	26.7453	28.7065	29.004	27.0213	28.3421	NaN	26.6542	NaN	26.6148	26.1774	27.339	25.1794	27.0879	27.8009	27.2889	26.8948	28.0864	26.8664	NaN	NaN	26.2672	24.7743	NaN	26.7292	27.9549	28.5348	27.3149
P07384	Calpain-1 catalytic subunit	CAPN1	27.6075	28.2098	NaN	25.522	23.1286	NaN	NaN	NaN	NaN	NaN	NaN	22.3666	24.1329	NaN	NaN	24.8746	NaN	NaN	NaN	NaN	NaN	NaN	25.9191	NaN	NaN	NaN	NaN	NaN	NaN	NaN	NaN	NaN	NaN	NaN	23.6866	NaN	NaN	NaN	NaN	NaN	NaN	NaN	NaN	NaN	NaN	NaN	NaN
Q6MZZ7	Calpain-13	CAPN13	NaN	27.0732	28.2971	NaN	NaN	26.7515	28.0923	27.7393	NaN	NaN	NaN	NaN	24.4338	NaN	29.3625	NaN	29.6417	29.2102	NaN	24.4363	28.5918	28.0997	NaN	NaN	30.8013	NaN	NaN	28.2393	NaN	28.3327	NaN	26.8859	NaN	29.8791	NaN	30.4685	31.2588	30.4152	NaN	30.1225	NaN	31.5181	30.3652	29.2084	31.9563	NaN	29.7862
P17655	Calpain-2 catalytic subunit	CAPN2	26.5349	28.5254	25.5051	26.2297	NaN	NaN	NaN	NaN	NaN	NaN	NaN	NaN	25.0091	25.5955	NaN	NaN	NaN	NaN	NaN	NaN	NaN	25.8284	26.038	NaN	NaN	NaN	NaN	NaN	NaN	25.8503	NaN	NaN	24.2966	26.1001	NaN	NaN	26.7341	NaN	NaN	NaN	NaN	NaN	NaN	NaN	NaN	NaN	NaN
P20807	Calpain-3	CAPN3	NaN	NaN	NaN	23.4615	NaN	NaN	NaN	NaN	25.4625	NaN	NaN	NaN	NaN	NaN	NaN	NaN	NaN	NaN	NaN	26.7421	NaN	NaN	NaN	NaN	NaN	NaN	NaN	NaN	NaN	NaN	NaN	NaN	NaN	NaN	NaN	NaN	NaN	NaN	NaN	NaN	NaN	NaN	NaN	26.7437	NaN	NaN	NaN
Q9Y6W3	Calpain-7	CAPN7	NaN	NaN	NaN	NaN	NaN	NaN	NaN	NaN	NaN	NaN	NaN	NaN	26.6195	NaN	NaN	NaN	NaN	NaN	NaN	NaN	NaN	NaN	NaN	NaN	NaN	NaN	NaN	NaN	NaN	NaN	NaN	NaN	NaN	NaN	NaN	NaN	NaN	NaN	NaN	NaN	NaN	NaN	NaN	NaN	NaN	NaN	NaN
P04632	Calpain small subunit 1	CAPNS1	26.5209	26.6433	26.1838	25.3678	24.7824	24.9423	NaN	NaN	NaN	25.3782	26.4205	26.0388	26.241	27.0511	26.8949	26.425	NaN	26.6034	NaN	NaN	25.9614	27.4772	27.2639	25.547	27.3683	NaN	25.6665	NaN	NaN	NaN	NaN	NaN	NaN	26.7352	NaN	26.8277	27.2436	NaN	26.8497	24.8783	26.3848	NaN	22.7106	25.9959	27.2366	27.3721	NaN
Q14444	Caprin-1	CAPRIN1	23.4382	23.5918	NaN	24.4929	NaN	NaN	NaN	NaN	NaN	NaN	NaN	NaN	NaN	NaN	NaN	NaN	NaN	NaN	NaN	NaN	NaN	NaN	NaN	NaN	NaN	NaN	NaN	NaN	NaN	NaN	NaN	NaN	NaN	NaN	NaN	NaN	NaN	NaN	NaN	NaN	NaN	NaN	NaN	NaN	NaN	NaN	NaN
Q13938	Calcyphosin	CAPS	26.3072	26.8236	28.076	26.7111	27.5741	27.7069	27.6298	27.4415	27.7677	28.4729	26.5298	29.7365	28.6284	30.7155	29.0515	29.8917	30.4001	29.5801	29.566	29.1498	29.7441	29.7576	27.6168	27.6831	28.5098	28.5522	29.0695	29.8663	27.4261	28.4413	27.7017	28.5114	26.6761	29.3217	29.1582	30.9559	30.0371	30.8619	30.8462	29.8178	29.8932	29.5558	30.5999	29.146	29.2641	29.2717	29.1634
P52907	F-actin-capping protein subunit alpha-1	CAPZA1	29.0572	29.7544	25.3681	29.247	24.0454	24.4668	NaN	24.2363	NaN	NaN	23.8468	26.0394	27.1366	NaN	25.9761	24.4969	NaN	24.7473	NaN	NaN	NaN	26.0321	27.556	NaN	26.5655	25.4713	NaN	NaN	NaN	26.362	24.258	NaN	NaN	27.7321	NaN	NaN	25.2557	25.9812	25.718	NaN	NaN	NaN	NaN	NaN	27.1785	27.5053	25.6337
P47755	F-actin-capping protein subunit alpha-2	CAPZA2	29.9672	29.2031	26.2384	30.096	24.5	25.3787	NaN	NaN	NaN	NaN	NaN	26.602	27.4771	26.9963	26.4294	26.6517	24.0773	25.9859	25.4085	NaN	NaN	26.7195	28.0363	26.2937	27.2686	NaN	24.7986	NaN	NaN	NaN	25.4518	NaN	NaN	27.3737	27.0032	27.9067	27.4666	24.8348	NaN	24.6502	NaN	25.1066	NaN	NaN	26.1334	27.3091	25.465
P47756	F-actin-capping protein subunit beta	CAPZB	29.4846	28.9678	25.8344	29.9477	NaN	24.7981	NaN	NaN	NaN	23.7736	23.7754	26.3394	26.3979	25.7825	26.0114	26.16	25.4616	26.0652	NaN	25.2444	NaN	25.6964	27.158	24.4209	26.3242	NaN	NaN	NaN	23.2195	NaN	23.6119	NaN	NaN	24.4586	24.0288	NaN	24.7953	NaN	NaN	NaN	NaN	NaN	NaN	NaN	25.4089	25.9859	24.8943
Q9H257	Caspase recruitment domain-containing protein 9	CARD9	NaN	NaN	NaN	NaN	NaN	NaN	NaN	NaN	NaN	NaN	NaN	NaN	NaN	NaN	NaN	NaN	NaN	NaN	NaN	NaN	NaN	NaN	NaN	NaN	NaN	NaN	NaN	NaN	NaN	NaN	NaN	NaN	NaN	NaN	NaN	NaN	NaN	NaN	NaN	NaN	NaN	NaN	NaN	NaN	NaN	NaN	NaN
Q9Y2V2	Calcium-regulated heat stable protein 1	CARHSP1	NaN	NaN	NaN	NaN	NaN	NaN	NaN	NaN	NaN	NaN	NaN	NaN	NaN	NaN	NaN	NaN	NaN	NaN	NaN	NaN	NaN	NaN	NaN	NaN	NaN	NaN	NaN	NaN	NaN	NaN	NaN	NaN	NaN	NaN	NaN	NaN	NaN	NaN	NaN	NaN	NaN	NaN	NaN	NaN	NaN	NaN	NaN
Q8IW45	ATP-dependent (S)-NAD(P)H-hydrate dehydratase	CARKD	23.5949	23.0698	NaN	NaN	NaN	NaN	NaN	NaN	NaN	NaN	NaN	NaN	NaN	NaN	NaN	NaN	NaN	NaN	NaN	NaN	NaN	NaN	NaN	NaN	NaN	NaN	NaN	NaN	NaN	NaN	NaN	NaN	NaN	NaN	NaN	NaN	NaN	NaN	NaN	NaN	NaN	NaN	NaN	NaN	NaN	NaN	NaN
P49589	Cysteine--tRNA ligase, cytoplasmic	CARS	25.1633	25.5785	NaN	NaN	NaN	NaN	NaN	NaN	NaN	NaN	NaN	NaN	NaN	NaN	NaN	NaN	NaN	NaN	NaN	NaN	NaN	NaN	NaN	NaN	NaN	NaN	NaN	NaN	NaN	NaN	NaN	NaN	NaN	NaN	NaN	NaN	NaN	NaN	NaN	NaN	NaN	NaN	NaN	NaN	NaN	NaN	NaN
Q6P4E1	Protein CASC4	CASC4	NaN	NaN	NaN	NaN	NaN	NaN	NaN	NaN	NaN	NaN	NaN	NaN	NaN	NaN	NaN	NaN	NaN	NaN	NaN	NaN	NaN	25.194	NaN	NaN	NaN	NaN	NaN	NaN	NaN	NaN	NaN	NaN	NaN	NaN	NaN	NaN	NaN	NaN	NaN	NaN	NaN	NaN	NaN	NaN	NaN	NaN	NaN
P31944	Caspase-14;Caspase-14 subunit p17, mature form;Caspase-14 subunit p10, mature form;Caspase-14 subunit p20, intermediate form;Caspase-14 subunit p8, intermediate form	CASP14	NaN	NaN	NaN	NaN	NaN	NaN	NaN	NaN	NaN	NaN	22.2806	NaN	NaN	NaN	NaN	NaN	NaN	NaN	NaN	NaN	NaN	NaN	NaN	NaN	NaN	NaN	NaN	NaN	NaN	NaN	NaN	NaN	NaN	NaN	NaN	NaN	NaN	NaN	NaN	NaN	NaN	NaN	NaN	NaN	NaN	NaN	NaN
P49662	Caspase-4;Caspase-4 subunit 1;Caspase-4 subunit 2	CASP4	NaN	NaN	NaN	NaN	NaN	NaN	NaN	NaN	NaN	NaN	NaN	NaN	NaN	NaN	NaN	NaN	NaN	NaN	NaN	NaN	NaN	NaN	NaN	NaN	NaN	NaN	NaN	NaN	NaN	NaN	NaN	NaN	NaN	NaN	NaN	NaN	NaN	NaN	NaN	NaN	NaN	NaN	NaN	NaN	NaN	NaN	NaN
P31415	Calsequestrin-1	CASQ1	32.2632	22.8006	22.8051	32.9335	NaN	NaN	NaN	NaN	NaN	NaN	NaN	26.2812	26.073	25.994	22.1059	25.4469	26.7757	26.7542	27.4875	NaN	NaN	26.2539	24.6511	24.1751	24.3294	24.468	24.4183	NaN	24.0503	NaN	NaN	NaN	NaN	29.1649	22.1066	NaN	27.8486	26.8033	NaN	26.8277	NaN	27.7783	NaN	NaN	NaN	NaN	NaN
O14958	Calsequestrin-2	CASQ2	26.6477	NaN	NaN	26.4068	NaN	NaN	NaN	NaN	NaN	NaN	NaN	NaN	NaN	NaN	NaN	NaN	NaN	NaN	NaN	NaN	NaN	NaN	NaN	25.8578	26.7526	NaN	NaN	NaN	NaN	NaN	NaN	NaN	NaN	NaN	NaN	NaN	NaN	NaN	NaN	NaN	NaN	NaN	NaN	NaN	NaN	NaN	NaN
P20810	Calpastatin	CAST	27.416	27.5886	NaN	27.4547	NaN	NaN	NaN	NaN	NaN	NaN	NaN	NaN	NaN	23.9108	25.066	NaN	NaN	NaN	NaN	NaN	NaN	NaN	26.4959	NaN	27.2288	NaN	NaN	NaN	NaN	25.049	NaN	NaN	NaN	NaN	NaN	NaN	NaN	NaN	NaN	NaN	NaN	NaN	NaN	NaN	NaN	NaN	NaN
P04040	Catalase	CAT	30.0931	29.8902	27.8963	30.6415	26.3143	27.3089	23.2753	24.7566	23.1878	23.3259	24.6986	25.349	26.1173	27.9675	24.8492	23.9716	23.585	24.0932	26.4766	NaN	24.8376	23.6862	29.3945	27.8561	26.669	28.1412	25.9851	NaN	27.1153	24.54	27.5381	25.1124	27.3834	24.4989	23.5837	NaN	24.8314	25.2235	NaN	NaN	25.729	24.3038	NaN	25.1245	29.2874	28.7077	25.9704
Q03135	Caveolin-1	CAV1	27.8036	27.2992	NaN	27.5394	26.693	NaN	NaN	NaN	NaN	NaN	NaN	26.4661	28.9466	28.079	28.6529	28.4822	NaN	28.3536	NaN	27.3138	26.6525	30.0994	27.4591	NaN	NaN	NaN	NaN	NaN	NaN	NaN	NaN	NaN	NaN	26.7217	26.1301	NaN	26.0328	NaN	NaN	NaN	25.7663	26.1769	25.9367	28.2957	27.186	NaN	NaN
P51636	Caveolin-2	CAV2	NaN	NaN	NaN	NaN	NaN	NaN	NaN	NaN	NaN	NaN	NaN	NaN	NaN	NaN	25.6841	25.6807	24.371	25.6656	NaN	NaN	NaN	NaN	NaN	NaN	NaN	NaN	NaN	NaN	NaN	NaN	NaN	NaN	NaN	NaN	NaN	NaN	NaN	NaN	NaN	NaN	NaN	NaN	NaN	NaN	NaN	NaN	NaN
Q13951	Core-binding factor subunit beta	CBFB	24.3177	24.0781	NaN	24.2586	NaN	NaN	NaN	NaN	NaN	NaN	NaN	NaN	NaN	NaN	NaN	NaN	NaN	NaN	NaN	NaN	NaN	NaN	NaN	NaN	NaN	NaN	NaN	NaN	NaN	NaN	NaN	NaN	NaN	NaN	NaN	NaN	NaN	NaN	NaN	NaN	NaN	NaN	NaN	NaN	NaN	NaN	NaN
P16152	Carbonyl reductase [NADPH] 1	CBR1	27.9413	28.1814	26.6636	28.3292	25.5934	25.7164	NaN	24.3963	NaN	NaN	NaN	26.6127	27.0973	26.8765	27.6012	27.1386	25.5697	26.9673	NaN	26.4292	26.8286	26.7024	27.1872	25.6357	27.696	25.6393	NaN	NaN	23.4215	NaN	24.321	NaN	NaN	27.8554	26.6442	NaN	NaN	NaN	NaN	NaN	NaN	NaN	NaN	NaN	26.2201	26.945	25.9494
O75828	Carbonyl reductase [NADPH] 3	CBR3	23.8476	24.8584	NaN	25.3554	NaN	NaN	NaN	NaN	NaN	NaN	NaN	NaN	NaN	NaN	NaN	NaN	NaN	NaN	NaN	NaN	NaN	NaN	NaN	NaN	NaN	NaN	NaN	NaN	NaN	NaN	NaN	NaN	NaN	NaN	NaN	NaN	NaN	NaN	NaN	NaN	NaN	NaN	NaN	NaN	NaN	NaN	NaN
P83916	Chromobox protein homolog 1	CBX1	25.4717	25.7119	NaN	25.7752	NaN	NaN	NaN	NaN	NaN	NaN	NaN	NaN	NaN	NaN	NaN	NaN	NaN	NaN	NaN	NaN	NaN	NaN	25.9758	NaN	NaN	NaN	NaN	NaN	NaN	NaN	NaN	NaN	NaN	NaN	NaN	NaN	NaN	NaN	NaN	NaN	NaN	NaN	NaN	NaN	NaN	25.4288	NaN
Q13185	Chromobox protein homolog 3	CBX3	26.0246	26.3722	NaN	26.654	NaN	NaN	NaN	NaN	NaN	NaN	NaN	24.6294	25.0861	NaN	NaN	NaN	NaN	NaN	NaN	NaN	NaN	NaN	25.2177	NaN	NaN	NaN	NaN	NaN	NaN	NaN	NaN	NaN	NaN	NaN	NaN	NaN	NaN	NaN	NaN	NaN	NaN	NaN	NaN	NaN	25.7749	NaN	NaN
P45973	Chromobox protein homolog 5	CBX5	NaN	22.3522	NaN	NaN	NaN	NaN	NaN	NaN	NaN	NaN	NaN	NaN	NaN	NaN	NaN	NaN	NaN	NaN	NaN	NaN	NaN	NaN	NaN	NaN	NaN	NaN	NaN	NaN	NaN	NaN	NaN	NaN	NaN	NaN	NaN	NaN	NaN	NaN	NaN	NaN	NaN	NaN	NaN	NaN	NaN	NaN	NaN
Q8N163	Cell cycle and apoptosis regulator protein 2	CCAR2	23.7074	23.7862	NaN	NaN	NaN	NaN	NaN	NaN	NaN	NaN	NaN	NaN	NaN	NaN	NaN	NaN	NaN	NaN	NaN	NaN	NaN	NaN	NaN	NaN	NaN	NaN	NaN	NaN	NaN	NaN	NaN	NaN	NaN	NaN	NaN	NaN	NaN	NaN	NaN	NaN	NaN	NaN	NaN	NaN	NaN	NaN	NaN
Q6YP21	Kynurenine--oxoglutarate transaminase 3	CCBL2	NaN	NaN	NaN	NaN	NaN	NaN	NaN	NaN	NaN	NaN	NaN	NaN	NaN	NaN	NaN	NaN	NaN	NaN	NaN	NaN	NaN	NaN	NaN	NaN	NaN	NaN	NaN	NaN	NaN	NaN	NaN	NaN	NaN	NaN	NaN	NaN	NaN	NaN	NaN	NaN	NaN	NaN	NaN	NaN	NaN	NaN	NaN
Q96CT7	Coiled-coil domain-containing protein 124	CCDC124	NaN	NaN	NaN	NaN	NaN	NaN	NaN	NaN	NaN	NaN	NaN	NaN	NaN	NaN	NaN	NaN	NaN	NaN	NaN	NaN	NaN	NaN	NaN	NaN	NaN	NaN	NaN	NaN	NaN	NaN	NaN	NaN	NaN	NaN	NaN	NaN	NaN	NaN	NaN	NaN	NaN	NaN	NaN	NaN	NaN	NaN	NaN
O60826	Coiled-coil domain-containing protein 22	CCDC22	NaN	25.1991	NaN	NaN	NaN	24.322	NaN	NaN	NaN	NaN	NaN	NaN	NaN	NaN	NaN	NaN	NaN	NaN	NaN	NaN	NaN	NaN	NaN	NaN	NaN	NaN	NaN	NaN	NaN	NaN	NaN	NaN	NaN	NaN	NaN	NaN	NaN	NaN	NaN	NaN	NaN	NaN	NaN	NaN	NaN	NaN	NaN
Q16204	Coiled-coil domain-containing protein 6	CCDC6	23.5923	24.3688	NaN	23.9822	NaN	NaN	NaN	NaN	NaN	NaN	NaN	24.0537	NaN	NaN	NaN	NaN	NaN	NaN	NaN	NaN	NaN	NaN	23.6685	NaN	NaN	NaN	NaN	NaN	NaN	NaN	NaN	NaN	NaN	NaN	NaN	NaN	NaN	NaN	NaN	NaN	NaN	NaN	NaN	NaN	NaN	NaN	NaN
Q9Y6R9	Coiled-coil domain-containing protein 61	CCDC61	NaN	NaN	NaN	NaN	NaN	NaN	NaN	NaN	NaN	NaN	NaN	NaN	NaN	NaN	NaN	NaN	NaN	NaN	NaN	NaN	NaN	NaN	NaN	NaN	NaN	NaN	NaN	NaN	NaN	NaN	NaN	NaN	NaN	NaN	NaN	NaN	NaN	NaN	NaN	NaN	NaN	NaN	NaN	NaN	NaN	NaN	24.7376
Q76M96	Coiled-coil domain-containing protein 80	CCDC80	30.1349	30.1315	32.5747	27.7473	32.0083	32.7061	33.2004	33.1464	33.07	33.6497	33.0632	31.8051	31.6418	31.9875	31.4284	31.9057	32.2607	32.2379	32.6775	32.0226	32.1666	32.2052	32.2679	33.2894	32.2469	33.2728	33.7525	34.0732	33.2138	33.8499	32.7387	33.2607	33.0935	31.0815	31.6917	32.111	32.202	32.3585	33.2009	32.4553	32.7134	32.7604	32.307	32.4079	34.0722	33.523	33.8215
Q3V6T2	Girdin	CCDC88A	NaN	NaN	NaN	NaN	NaN	NaN	NaN	NaN	NaN	NaN	NaN	27.3366	NaN	NaN	NaN	NaN	NaN	NaN	NaN	NaN	NaN	NaN	NaN	NaN	NaN	NaN	NaN	NaN	NaN	NaN	NaN	NaN	NaN	NaN	NaN	NaN	NaN	NaN	NaN	NaN	NaN	NaN	NaN	NaN	NaN	NaN	NaN
Q567U6	Coiled-coil domain-containing protein 93	CCDC93	NaN	NaN	NaN	NaN	NaN	NaN	NaN	NaN	NaN	NaN	NaN	NaN	NaN	NaN	NaN	NaN	NaN	NaN	NaN	NaN	NaN	NaN	NaN	NaN	NaN	NaN	NaN	NaN	NaN	NaN	NaN	NaN	NaN	NaN	NaN	NaN	NaN	NaN	NaN	NaN	NaN	NaN	NaN	NaN	NaN	NaN	NaN
Q16627	C-C motif chemokine 14;HCC-1(3-74);HCC-1(4-74);HCC-1(9-74)	CCL14	NaN	23.4175	25.3818	NaN	24.7757	26.0577	25.4384	23.8213	NaN	26.3226	NaN	NaN	25.0708	NaN	NaN	NaN	26.7837	27.2437	NaN	27.2098	NaN	27.5222	25.6759	26.2563	NaN	27.0288	26.3964	28.1524	25.7173	26.6094	NaN	26.3929	NaN	NaN	NaN	NaN	NaN	26.3138	NaN	NaN	NaN	NaN	NaN	27.9113	27.6873	27.9941	26.3843
O15467	C-C motif chemokine 16	CCL16	NaN	NaN	NaN	NaN	NaN	24.8139	NaN	NaN	NaN	NaN	25.0857	NaN	NaN	NaN	NaN	NaN	NaN	NaN	NaN	NaN	NaN	NaN	NaN	NaN	NaN	NaN	NaN	NaN	24.6593	NaN	NaN	NaN	NaN	NaN	NaN	NaN	NaN	NaN	NaN	NaN	NaN	NaN	NaN	NaN	NaN	NaN	NaN
P55774	C-C motif chemokine 18;CCL18(1-68);CCL18(3-69);CCL18(4-69)	CCL18	NaN	NaN	NaN	NaN	26.3876	27.631	NaN	26.9612	NaN	27.3796	NaN	27.1343	NaN	NaN	NaN	28.9105	28.5228	28.3606	29.5939	30.0389	28.9	29.979	27.7001	27.8558	27.5555	28.1558	27.7047	29.0894	26.9184	26.7605	NaN	27.8994	NaN	NaN	NaN	NaN	28.178	28.2671	29.9068	28.2035	29.9874	28.9602	29.5042	30.5821	27.8678	NaN	NaN
O00585	C-C motif chemokine 21	CCL21	NaN	26.1041	NaN	NaN	27.7749	NaN	NaN	25.5225	NaN	NaN	NaN	NaN	25.6968	26.1608	28.1365	29.0582	27.1653	27.5853	24.6706	23.9827	26.3422	28.3875	25.4254	NaN	NaN	26.2193	NaN	NaN	NaN	25.6501	NaN	NaN	NaN	25.1497	28.7137	23.8681	21.2194	27.8075	25.199	24.0524	NaN	21.7639	24.8969	25.613	NaN	NaN	NaN
O14618	Copper chaperone for superoxide dismutase	CCS	NaN	NaN	NaN	NaN	NaN	NaN	NaN	NaN	NaN	NaN	NaN	NaN	NaN	NaN	NaN	NaN	NaN	NaN	NaN	NaN	NaN	NaN	NaN	NaN	NaN	NaN	NaN	NaN	NaN	NaN	NaN	NaN	NaN	NaN	NaN	NaN	NaN	NaN	NaN	NaN	NaN	NaN	NaN	NaN	NaN	NaN	NaN
P78371	T-complex protein 1 subunit beta	CCT2	28.3989	28.9538	24.6458	28.9346	24.8791	24.0996	NaN	NaN	NaN	NaN	NaN	24.8303	26.0834	25.5347	NaN	NaN	NaN	NaN	NaN	NaN	NaN	NaN	26.2169	NaN	24.1748	24.9208	23.5358	NaN	24.5224	NaN	24.1603	NaN	NaN	NaN	24.4172	25.5829	NaN	NaN	NaN	NaN	NaN	NaN	NaN	NaN	25.8559	NaN	NaN
P49368	T-complex protein 1 subunit gamma	CCT3	28.7841	28.6349	26.5236	28.582	NaN	26.1756	NaN	NaN	NaN	NaN	24.8732	NaN	26.7169	NaN	NaN	NaN	NaN	26.2182	NaN	NaN	NaN	NaN	26.7988	26.7214	27.7319	26.4867	NaN	NaN	26.6865	NaN	26.6072	NaN	NaN	27.263	NaN	NaN	27.4202	26.7505	NaN	NaN	NaN	NaN	NaN	NaN	NaN	NaN	24.9329
P50991	T-complex protein 1 subunit delta	CCT4	25.9926	27.5019	25.0537	25.292	NaN	23.5838	23.8206	NaN	NaN	23.1667	NaN	24.9738	24.7457	24.6506	NaN	26.0139	NaN	NaN	NaN	NaN	NaN	26.0354	25.3178	24.767	26.0659	NaN	NaN	NaN	NaN	NaN	24.737	NaN	NaN	25.0112	25.5468	NaN	NaN	25.836	NaN	NaN	NaN	NaN	NaN	NaN	NaN	NaN	24.9103
P48643	T-complex protein 1 subunit epsilon	CCT5	28.8591	28.46	NaN	28.921	NaN	NaN	NaN	NaN	NaN	NaN	27.093	NaN	NaN	NaN	26.4266	NaN	NaN	NaN	NaN	26.6185	NaN	NaN	26.8874	NaN	NaN	NaN	NaN	NaN	NaN	NaN	NaN	NaN	NaN	NaN	NaN	NaN	NaN	NaN	NaN	NaN	NaN	NaN	NaN	NaN	26.7366	NaN	NaN
P40227	T-complex protein 1 subunit zeta	CCT6A	28.0663	27.7792	23.5352	28.2119	NaN	NaN	23.6181	NaN	NaN	NaN	NaN	23.6171	23.3202	NaN	NaN	NaN	NaN	NaN	NaN	NaN	NaN	NaN	25.8114	NaN	NaN	NaN	NaN	NaN	NaN	NaN	NaN	NaN	NaN	NaN	24.2031	NaN	NaN	NaN	NaN	NaN	NaN	NaN	NaN	NaN	NaN	NaN	NaN
Q92526	T-complex protein 1 subunit zeta-2	CCT6B	NaN	NaN	NaN	NaN	NaN	NaN	NaN	NaN	NaN	NaN	NaN	NaN	NaN	NaN	NaN	NaN	NaN	NaN	NaN	NaN	NaN	NaN	NaN	NaN	NaN	NaN	NaN	NaN	NaN	NaN	NaN	NaN	NaN	NaN	NaN	NaN	NaN	NaN	NaN	NaN	NaN	NaN	NaN	NaN	NaN	NaN	NaN
Q99832	T-complex protein 1 subunit eta	CCT7	26.3435	26.0686	NaN	25.8637	NaN	NaN	NaN	NaN	NaN	NaN	NaN	NaN	NaN	NaN	NaN	NaN	NaN	NaN	NaN	NaN	NaN	25.052	25.8759	NaN	NaN	NaN	NaN	NaN	NaN	NaN	NaN	NaN	NaN	NaN	NaN	NaN	NaN	NaN	NaN	NaN	NaN	NaN	NaN	NaN	NaN	NaN	NaN
P50990	T-complex protein 1 subunit theta	CCT8	28.6024	28.3188	24.6991	27.7793	NaN	NaN	NaN	23.6869	NaN	NaN	23.8955	23.9327	26.2443	NaN	25.6354	25.1393	NaN	24.3183	24.4481	NaN	25.2698	NaN	26.389	23.8288	25.1891	24.7419	23.9471	NaN	24.8188	NaN	NaN	NaN	NaN	25.3801	NaN	24.6966	25.2447	NaN	25.429	24.9691	24.7521	26.6188	24.1198	NaN	NaN	25.6193	24.8173
Q6YHK3	CD109 antigen	CD109	29.1322	29.1489	29.4163	28.0289	30.1959	30.2154	30.1509	29.9371	29.6648	30.2368	29.6182	30.8495	30.6326	31.44	31.0452	33.4103	32.0912	33.3922	32.4829	33.1737	32.7704	33.7423	30.4755	30.8297	29.7963	31.0209	30.9106	31.1529	29.8573	30.3279	29.3429	30.2633	29.9535	30.6005	31.2936	30.7778	31.3393	32.0587	31.5362	33.0461	32.7544	33.0997	32.6929	33.1559	31.4308	31.6536	30.2932
P08571	Monocyte differentiation antigen CD14;Monocyte differentiation antigen CD14, urinary form;Monocyte differentiation antigen CD14, membrane-bound form	CD14	28.4885	28.5669	28.6763	27.9478	28.1977	28.2076	29.6537	28.6267	29.3361	28.9928	29.8505	26.4324	25.8709	NaN	NaN	25.2743	NaN	24.6399	NaN	NaN	NaN	NaN	26.9778	27.4933	27.2845	27.1444	27.6813	29.0355	28.7576	28.0518	29.249	27.9427	29.1113	NaN	24.9164	NaN	NaN	NaN	NaN	NaN	NaN	NaN	NaN	NaN	NaN	26.9495	26.7087
P48509	CD151 antigen	CD151	NaN	NaN	NaN	NaN	NaN	NaN	NaN	NaN	NaN	NaN	NaN	NaN	NaN	NaN	NaN	NaN	NaN	NaN	NaN	NaN	NaN	NaN	NaN	NaN	NaN	NaN	NaN	NaN	NaN	NaN	NaN	NaN	NaN	NaN	NaN	NaN	NaN	NaN	NaN	NaN	NaN	NaN	NaN	NaN	NaN	NaN	24.0943
Q86VB7	Scavenger receptor cysteine-rich type 1 protein M130;Soluble CD163	CD163	29.2747	28.6818	23.1047	29.9693	NaN	22.8139	NaN	NaN	NaN	NaN	23.4422	NaN	NaN	NaN	24.5955	23.8683	NaN	NaN	NaN	NaN	24.1874	24.1662	23.3752	NaN	NaN	NaN	NaN	NaN	24.0551	NaN	NaN	NaN	24.3204	25.0581	NaN	21.9135	20.91	NaN	NaN	NaN	NaN	NaN	NaN	NaN	NaN	NaN	23.7424
Q9NR16	Scavenger receptor cysteine-rich type 1 protein M160	CD163L1	22.045	NaN	NaN	NaN	NaN	NaN	NaN	NaN	NaN	NaN	NaN	NaN	NaN	NaN	NaN	NaN	NaN	NaN	NaN	NaN	NaN	NaN	NaN	NaN	NaN	NaN	NaN	NaN	NaN	NaN	NaN	NaN	NaN	NaN	NaN	NaN	NaN	NaN	NaN	NaN	NaN	NaN	NaN	NaN	NaN	NaN	NaN
Q9NNX6	CD209 antigen	CD209	27.0851	26.6118	NaN	NaN	27.8005	NaN	NaN	NaN	NaN	NaN	NaN	NaN	NaN	NaN	NaN	NaN	NaN	NaN	NaN	NaN	NaN	NaN	NaN	NaN	NaN	NaN	NaN	NaN	NaN	NaN	NaN	NaN	NaN	NaN	NaN	NaN	NaN	NaN	NaN	NaN	NaN	NaN	NaN	NaN	NaN	NaN	NaN
Q5ZPR3	CD276 antigen	CD276	NaN	NaN	NaN	NaN	22.9923	NaN	NaN	NaN	NaN	NaN	NaN	NaN	NaN	NaN	NaN	NaN	NaN	NaN	NaN	NaN	NaN	NaN	NaN	NaN	NaN	NaN	NaN	NaN	NaN	NaN	NaN	NaN	NaN	NaN	NaN	NaN	NaN	NaN	NaN	NaN	NaN	NaN	NaN	NaN	NaN	NaN	NaN
P28906	Hematopoietic progenitor cell antigen CD34	CD34	NaN	25.4025	NaN	26.3033	NaN	NaN	NaN	NaN	NaN	NaN	NaN	NaN	NaN	NaN	NaN	NaN	NaN	NaN	NaN	NaN	NaN	NaN	NaN	NaN	NaN	NaN	NaN	NaN	NaN	NaN	NaN	NaN	NaN	NaN	NaN	NaN	NaN	NaN	NaN	NaN	NaN	NaN	NaN	NaN	NaN	NaN	NaN
P16671	Platelet glycoprotein 4	CD36	25.0195	NaN	NaN	NaN	NaN	NaN	NaN	NaN	NaN	NaN	NaN	NaN	NaN	NaN	NaN	NaN	NaN	NaN	NaN	NaN	NaN	NaN	NaN	NaN	NaN	NaN	NaN	NaN	NaN	NaN	NaN	NaN	NaN	NaN	NaN	NaN	NaN	NaN	NaN	NaN	NaN	NaN	NaN	NaN	NaN	NaN	NaN
P16070	CD44 antigen	CD44	28.1308	27.6567	25.6151	27.6959	25.4445	24.5331	NaN	NaN	NaN	NaN	23.4264	NaN	26.2441	NaN	NaN	NaN	NaN	NaN	NaN	NaN	NaN	NaN	27.1041	NaN	26.1348	NaN	NaN	NaN	NaN	NaN	25.1453	NaN	24.5469	26.1044	NaN	NaN	NaN	NaN	NaN	NaN	NaN	NaN	NaN	NaN	NaN	NaN	NaN
Q08722	Leukocyte surface antigen CD47	CD47	24.9299	24.7125	NaN	NaN	NaN	NaN	NaN	NaN	NaN	NaN	NaN	25.6813	26.1691	27.565	27.0221	NaN	NaN	NaN	NaN	NaN	NaN	NaN	25.91	NaN	27.0354	26.1684	NaN	NaN	NaN	NaN	NaN	NaN	NaN	26.2057	26.3339	NaN	26.3775	NaN	NaN	NaN	NaN	NaN	NaN	NaN	25.9797	25.4482	NaN
P08174	Complement decay-accelerating factor	CD55	24.8071	26.0641	22.5812	24.0442	24.5362	NaN	NaN	NaN	NaN	NaN	25.1239	NaN	24.6048	NaN	NaN	NaN	NaN	NaN	NaN	NaN	27.0162	26.2557	NaN	NaN	25.436	NaN	25.7203	NaN	25.6562	NaN	NaN	NaN	NaN	NaN	NaN	NaN	NaN	NaN	NaN	25.394	NaN	NaN	NaN	NaN	NaN	25.604	26.3139
P13987	CD59 glycoprotein	CD59	25.9546	25.6467	NaN	25.7625	NaN	NaN	NaN	NaN	NaN	24.5135	NaN	25.6893	26.4508	27.4835	26.7272	25.7847	NaN	NaN	NaN	NaN	NaN	NaN	26.346	25.6228	NaN	NaN	NaN	NaN	NaN	NaN	NaN	NaN	NaN	NaN	NaN	NaN	NaN	NaN	NaN	NaN	NaN	NaN	NaN	NaN	NaN	25.7869	NaN
O43866	CD5 antigen-like	CD5L	28.8301	29.3158	29.4422	27.8471	31.7022	30.9189	30.1298	30.7232	30.4171	30.0976	31.1002	28.3085	NaN	NaN	NaN	NaN	NaN	NaN	26.0167	NaN	24.8424	NaN	27.7154	27.075	28.1473	27.1582	25.7903	26.3974	29.8066	28.9464	31.0136	29.3441	30.6217	NaN	NaN	NaN	NaN	NaN	NaN	NaN	NaN	NaN	NaN	25.7466	25.623	24.3202	24.8341
P08962	CD63 antigen	CD63	NaN	NaN	NaN	NaN	NaN	NaN	NaN	NaN	NaN	NaN	NaN	NaN	NaN	NaN	NaN	NaN	NaN	NaN	NaN	NaN	NaN	NaN	NaN	NaN	NaN	NaN	NaN	NaN	NaN	NaN	NaN	NaN	NaN	NaN	NaN	NaN	NaN	NaN	NaN	NaN	NaN	NaN	NaN	NaN	NaN	NaN	NaN
P34810	Macrosialin	CD68	22.8357	NaN	NaN	NaN	NaN	NaN	NaN	NaN	NaN	NaN	NaN	NaN	NaN	NaN	NaN	NaN	NaN	NaN	NaN	NaN	NaN	NaN	NaN	NaN	NaN	NaN	NaN	NaN	NaN	NaN	NaN	NaN	NaN	NaN	NaN	NaN	NaN	NaN	NaN	NaN	NaN	NaN	NaN	NaN	NaN	NaN	NaN
P04233	HLA class II histocompatibility antigen gamma chain	CD74	NaN	23.9506	NaN	NaN	NaN	NaN	NaN	NaN	NaN	NaN	NaN	NaN	NaN	NaN	NaN	NaN	NaN	NaN	NaN	NaN	NaN	NaN	NaN	NaN	NaN	NaN	NaN	NaN	NaN	NaN	NaN	NaN	NaN	NaN	NaN	NaN	NaN	NaN	NaN	NaN	NaN	NaN	NaN	NaN	NaN	NaN	NaN
P60033	CD81 antigen	CD81	27.2275	26.6823	26.4196	25.5991	NaN	25.6421	NaN	NaN	NaN	NaN	25.221	26.4782	27.306	27.7002	27.9174	25.8831	NaN	25.7824	NaN	NaN	NaN	26.0455	26.2495	25.543	NaN	NaN	NaN	NaN	NaN	NaN	NaN	NaN	NaN	27.2734	25.7781	NaN	26.6538	NaN	NaN	NaN	NaN	NaN	NaN	NaN	25.9129	26.2766	26.8243
Q9UIB8	SLAM family member 5	CD84	NaN	NaN	NaN	NaN	NaN	NaN	NaN	NaN	NaN	NaN	NaN	NaN	NaN	NaN	NaN	NaN	NaN	NaN	NaN	NaN	NaN	NaN	NaN	NaN	NaN	NaN	NaN	NaN	NaN	NaN	22.5736	NaN	NaN	NaN	NaN	NaN	NaN	NaN	NaN	NaN	NaN	NaN	NaN	NaN	NaN	NaN	NaN
P21926	CD9 antigen	CD9	26.1711	25.0813	26.155	25.4718	26.5251	NaN	NaN	25.6088	NaN	NaN	25.956	26.6378	27.358	28.618	28.1506	27.5522	27.3092	28.242	26.2066	30.1959	28.1533	27.7354	27.4675	27.3923	27.5185	27.8051	26.9033	NaN	25.7243	26.0996	24.8937	NaN	25.1886	27.243	27.9949	28.0656	NaN	27.1715	27.2763	27.5644	26.2904	NaN	NaN	27.8948	27.6406	27.8498	25.9403
Q9NPY3	Complement component C1q receptor	CD93	NaN	NaN	NaN	24.3699	NaN	NaN	NaN	NaN	NaN	NaN	NaN	NaN	NaN	NaN	NaN	NaN	NaN	NaN	NaN	NaN	NaN	NaN	NaN	NaN	NaN	NaN	NaN	NaN	NaN	NaN	NaN	NaN	NaN	NaN	NaN	NaN	NaN	NaN	NaN	NaN	NaN	NaN	NaN	NaN	NaN	NaN	NaN
P48960	CD97 antigen;CD97 antigen subunit alpha;CD97 antigen subunit beta	CD97	NaN	NaN	NaN	NaN	NaN	NaN	NaN	NaN	NaN	NaN	NaN	NaN	NaN	NaN	NaN	NaN	NaN	NaN	NaN	NaN	NaN	NaN	NaN	NaN	NaN	NaN	NaN	NaN	NaN	NaN	25.4273	NaN	NaN	NaN	NaN	NaN	NaN	NaN	NaN	NaN	NaN	NaN	NaN	NaN	NaN	NaN	NaN
P14209	CD99 antigen	CD99	NaN	24.9184	NaN	26.4355	NaN	NaN	NaN	NaN	NaN	NaN	NaN	NaN	NaN	NaN	NaN	NaN	NaN	NaN	NaN	NaN	NaN	NaN	NaN	NaN	NaN	NaN	NaN	NaN	NaN	NaN	NaN	NaN	NaN	NaN	NaN	NaN	NaN	NaN	NaN	NaN	NaN	NaN	NaN	NaN	NaN	NaN	NaN
Q16543	Hsp90 co-chaperone Cdc37;Hsp90 co-chaperone Cdc37, N-terminally processed	CDC37	26.6486	26.5332	NaN	26.6237	NaN	NaN	NaN	NaN	NaN	NaN	NaN	NaN	NaN	NaN	NaN	NaN	NaN	NaN	NaN	NaN	NaN	NaN	25.7644	NaN	NaN	NaN	NaN	NaN	NaN	NaN	NaN	NaN	NaN	NaN	NaN	NaN	NaN	NaN	NaN	NaN	NaN	NaN	NaN	NaN	NaN	NaN	NaN
P60953	Cell division control protein 42 homolog	CDC42	26.7959	27.3648	25.9174	26.2034	24.7995	25.9185	NaN	NaN	NaN	NaN	24.2186	26.39	26.6637	26.6055	25.6111	24.5145	25.4089	NaN	NaN	NaN	NaN	26.6036	26.0674	26.4453	27.3585	NaN	NaN	NaN	NaN	NaN	25.559	NaN	NaN	NaN	26.008	25.8662	24.2099	NaN	NaN	NaN	NaN	NaN	NaN	NaN	NaN	26.6216	25.2979
P12830	Cadherin-1;E-Cad/CTF1;E-Cad/CTF2;E-Cad/CTF3	CDH1	26.9157	25.1144	28.9233	NaN	28.1313	29.6927	27.1541	27.9028	29.6867	29.3036	28.6227	29.4744	27.8047	NaN	28.7678	30.388	30.5552	30.503	30.5037	30.8101	31.1498	30.8417	28.4194	28.6621	29.3079	31.0957	29.0715	30.4748	27.3558	29.1584	27.5391	28.3653	28.314	NaN	26.463	27.0208	28.0172	29.6365	28.1156	29.4298	29.6637	28.0281	29.2349	28.8802	31.0811	29.439	28.5974
P55287	Cadherin-11	CDH11	NaN	24.2847	NaN	23.2385	NaN	NaN	NaN	NaN	NaN	NaN	NaN	NaN	NaN	NaN	NaN	NaN	NaN	NaN	NaN	NaN	NaN	NaN	NaN	NaN	NaN	NaN	NaN	NaN	NaN	NaN	NaN	NaN	NaN	NaN	NaN	NaN	NaN	NaN	NaN	NaN	NaN	NaN	NaN	NaN	NaN	NaN	NaN
P55290	Cadherin-13	CDH13	26.5065	27.16	NaN	26.8913	24.1268	NaN	NaN	NaN	NaN	NaN	25.2358	26.5133	27.2552	NaN	27.2947	25.4166	26.1159	26.3241	NaN	25.0627	25.9155	27.1107	27.0142	NaN	NaN	NaN	26.4415	NaN	NaN	NaN	NaN	NaN	NaN	28.5743	26.8534	NaN	27.3028	NaN	NaN	27.919	NaN	NaN	NaN	24.7642	NaN	25.4035	NaN
P33151	Cadherin-5	CDH5	NaN	NaN	NaN	24.7444	NaN	NaN	NaN	NaN	NaN	NaN	NaN	NaN	NaN	NaN	NaN	NaN	NaN	NaN	NaN	NaN	NaN	NaN	NaN	NaN	NaN	NaN	NaN	NaN	NaN	NaN	NaN	NaN	NaN	NaN	NaN	NaN	NaN	NaN	NaN	NaN	NaN	NaN	NaN	NaN	NaN	NaN	NaN
Q9BYE9	Cadherin-related family member 2	CDHR2	NaN	NaN	NaN	NaN	NaN	23.8116	NaN	NaN	NaN	23.3906	NaN	NaN	NaN	NaN	NaN	NaN	NaN	NaN	NaN	NaN	NaN	NaN	NaN	NaN	NaN	NaN	NaN	NaN	NaN	NaN	NaN	NaN	NaN	NaN	NaN	NaN	NaN	NaN	NaN	NaN	NaN	NaN	NaN	NaN	NaN	NaN	NaN
Q00537	Cyclin-dependent kinase 17	CDK17	28.2783	29.4308	25.8681	27.9177	26.36	26.7405	24.5043	NaN	26.5406	NaN	26.7864	27.7964	29.2968	28.7537	28.5889	28.1628	25.9488	27.4892	28.3853	25.333	27.9661	28.2729	29.1535	25.2355	NaN	26.855	NaN	NaN	24.9638	26.4536	25.7059	NaN	NaN	29.3139	28.1454	27.8637	28.8556	28.0256	26.9792	NaN	NaN	27.5322	28.5142	28.226	NaN	26.2825	25.6441
Q15078	Cyclin-dependent kinase 5 activator 1;Cyclin-dependent kinase 5 activator 1, p35;Cyclin-dependent kinase 5 activator 1, p25	CDK5R1	NaN	25.1474	NaN	NaN	NaN	NaN	NaN	NaN	NaN	NaN	NaN	NaN	NaN	NaN	NaN	NaN	NaN	NaN	NaN	NaN	NaN	NaN	NaN	NaN	NaN	NaN	NaN	NaN	NaN	NaN	NaN	NaN	NaN	NaN	NaN	NaN	NaN	NaN	NaN	NaN	NaN	NaN	NaN	NaN	NaN	NaN	NaN
Q4KMG0	Cell adhesion molecule-related/down-regulated by oncogenes	CDON	NaN	NaN	NaN	NaN	NaN	NaN	23.0062	NaN	NaN	NaN	23.0137	NaN	NaN	NaN	NaN	NaN	NaN	NaN	NaN	NaN	NaN	NaN	NaN	NaN	NaN	NaN	NaN	NaN	NaN	NaN	NaN	NaN	NaN	NaN	NaN	NaN	NaN	NaN	NaN	NaN	NaN	NaN	NaN	NaN	NaN	NaN	NaN
Q15517	Corneodesmosin	CDSN	NaN	NaN	NaN	NaN	NaN	NaN	NaN	NaN	NaN	NaN	NaN	NaN	NaN	28.3512	NaN	NaN	25.0984	NaN	NaN	NaN	NaN	NaN	NaN	NaN	NaN	NaN	NaN	NaN	NaN	NaN	NaN	NaN	NaN	NaN	NaN	NaN	NaN	NaN	NaN	NaN	NaN	NaN	NaN	NaN	NaN	NaN	NaN
Q9UKY7	Protein CDV3 homolog	CDV3	22.35	22.7373	NaN	NaN	NaN	NaN	NaN	NaN	NaN	NaN	NaN	NaN	NaN	NaN	NaN	NaN	NaN	NaN	NaN	NaN	NaN	NaN	NaN	NaN	NaN	NaN	NaN	NaN	NaN	NaN	NaN	NaN	NaN	NaN	NaN	NaN	NaN	NaN	NaN	NaN	NaN	NaN	NaN	NaN	NaN	NaN	NaN
Q9NZK5	Adenosine deaminase CECR1	CECR1	NaN	NaN	NaN	NaN	NaN	NaN	NaN	NaN	NaN	NaN	NaN	NaN	NaN	NaN	NaN	NaN	NaN	NaN	NaN	NaN	NaN	NaN	NaN	NaN	NaN	NaN	NaN	NaN	NaN	NaN	23.2285	NaN	NaN	NaN	NaN	NaN	NaN	NaN	NaN	NaN	NaN	NaN	NaN	NaN	NaN	NaN	NaN
P09093;P08861	Chymotrypsin-like elastase family member 3A;Chymotrypsin-like elastase family member 3B	CELA3A;CELA3B	NaN	NaN	NaN	NaN	NaN	NaN	NaN	NaN	NaN	NaN	NaN	NaN	NaN	NaN	NaN	NaN	NaN	NaN	NaN	NaN	NaN	NaN	NaN	NaN	NaN	NaN	NaN	NaN	NaN	NaN	NaN	NaN	NaN	NaN	NaN	NaN	NaN	NaN	NaN	NaN	NaN	NaN	NaN	NaN	NaN	NaN	23.1492
Q9HCU4	Cadherin EGF LAG seven-pass G-type receptor 2	CELSR2	NaN	NaN	26.7268	NaN	26.6529	26.7369	25.1	NaN	NaN	NaN	NaN	NaN	NaN	NaN	NaN	NaN	NaN	NaN	NaN	NaN	NaN	NaN	NaN	26.0798	29.2724	NaN	NaN	NaN	NaN	NaN	28.5705	NaN	27.4249	NaN	NaN	NaN	NaN	NaN	NaN	NaN	NaN	NaN	NaN	NaN	NaN	NaN	NaN
Q8WUJ3	Cell migration-inducing and hyaluronan-binding protein	CEMIP	NaN	24.1096	NaN	NaN	NaN	NaN	NaN	NaN	NaN	NaN	NaN	NaN	NaN	NaN	NaN	NaN	NaN	NaN	NaN	NaN	NaN	NaN	NaN	NaN	NaN	NaN	NaN	NaN	NaN	NaN	NaN	NaN	NaN	NaN	NaN	NaN	NaN	NaN	NaN	NaN	NaN	NaN	NaN	NaN	NaN	NaN	NaN
P23141	Liver carboxylesterase 1	CES1	27.118	26.7077	NaN	27.1702	NaN	NaN	NaN	NaN	NaN	NaN	NaN	NaN	NaN	NaN	NaN	NaN	NaN	NaN	NaN	NaN	NaN	NaN	NaN	NaN	NaN	NaN	NaN	NaN	NaN	NaN	NaN	NaN	NaN	NaN	NaN	NaN	NaN	NaN	NaN	NaN	NaN	NaN	NaN	NaN	NaN	NaN	NaN
O00748	Cocaine esterase	CES2	NaN	NaN	NaN	NaN	NaN	NaN	NaN	NaN	NaN	NaN	NaN	NaN	NaN	NaN	NaN	NaN	NaN	NaN	NaN	NaN	NaN	NaN	NaN	NaN	NaN	NaN	NaN	NaN	NaN	NaN	NaN	NaN	NaN	NaN	NaN	NaN	NaN	NaN	NaN	NaN	NaN	NaN	NaN	NaN	NaN	NaN	NaN
P41208	Centrin-2	CETN2	NaN	NaN	NaN	NaN	NaN	NaN	NaN	NaN	NaN	NaN	NaN	NaN	NaN	NaN	NaN	NaN	NaN	NaN	NaN	NaN	NaN	NaN	NaN	NaN	NaN	NaN	NaN	NaN	NaN	NaN	NaN	NaN	NaN	NaN	NaN	NaN	NaN	NaN	NaN	NaN	NaN	NaN	NaN	NaN	NaN	NaN	NaN
P11597	Cholesteryl ester transfer protein	CETP	NaN	NaN	NaN	NaN	NaN	NaN	24.9167	NaN	NaN	NaN	24.5198	NaN	NaN	NaN	NaN	NaN	NaN	NaN	NaN	NaN	NaN	NaN	NaN	NaN	NaN	NaN	NaN	NaN	25.4129	NaN	25.4774	NaN	26.6285	NaN	NaN	NaN	NaN	NaN	NaN	NaN	NaN	NaN	NaN	NaN	NaN	NaN	NaN
P00751	Complement factor B;Complement factor B Ba fragment;Complement factor B Bb fragment	CFB	32.8699	33.1056	33.9164	32.7059	34.9876	34.314	34.7101	34.5561	34.4483	34.4892	34.6889	31.0527	31.0088	31.6409	30.3924	31.9719	31.8326	32.2502	32.2896	31.933	32.1099	32.1399	31.8393	32.2697	32.1321	32.1183	33.2213	33.1336	33.7777	33.5312	33.5097	33.6986	33.7812	30.7737	30.8632	30.2807	30.8579	31.3853	32.0188	31.8863	32.2857	31.829	32.4541	32.074	30.9916	31.6404	31.5758
P00746	Complement factor D	CFD	29.6975	29.2411	28.3845	29.5118	28.8842	29.6035	28.4377	27.857	28.1282	28.9641	28.9041	29.2625	30.233	28.0673	29.2155	28.254	27.3658	27.1915	27.8589	26.862	25.7032	27.6272	30.1425	30.3196	29.1607	30.4662	29.6413	29.9176	28.3588	28.9746	28.7008	28.7492	28.0085	30.5499	29.8285	24.7576	29.9101	28.267	27.3273	27.3567	29.3503	26.8424	28.4603	27.8637	30.533	30.735	28.721
P08603	Complement factor H	CFH	33.4228	33.7414	34.0045	33.1382	35.4062	34.6591	34.2257	34.6323	34.2979	33.9746	34.9132	34.0094	30.1759	29.1297	29.8496	30.7323	30.5217	31.2294	31.5051	31.1574	31.2285	31.4128	32.2385	32.0363	32.4542	32.3053	32.2645	32.4238	33.6576	33.3646	34.0385	33.1686	34.2326	30.4783	30.2894	25.9924	30.3706	29.1252	30.4015	31.1399	31.1213	29.7209	30.9673	31.3385	31.7392	31.4616	31.3043
Q03591	Complement factor H-related protein 1	CFHR1	27.3476	28.6793	29.7043	27.0099	30.6286	30.3196	30.193	28.9283	29.7276	30.1096	31.1778	25.7734	NaN	NaN	NaN	26.5231	NaN	NaN	NaN	NaN	NaN	25.8679	NaN	27.3454	28.1026	NaN	27.7159	27.8965	29.9211	29.7539	28.2899	29.4172	29.0948	NaN	NaN	NaN	NaN	NaN	NaN	NaN	26.8968	NaN	21.5738	NaN	NaN	NaN	26.1751
P36980	Complement factor H-related protein 2	CFHR2	26.216	26.8713	28.1404	25.8633	28.8426	27.7545	28.6182	28.8442	28.8321	28.0467	28.5901	26.2258	NaN	NaN	NaN	NaN	NaN	NaN	NaN	NaN	NaN	NaN	26.3525	26.6604	NaN	25.2942	27.5708	NaN	27.5718	28.0843	28.4499	27.4663	28.5924	NaN	NaN	NaN	NaN	NaN	NaN	NaN	NaN	NaN	NaN	NaN	NaN	NaN	25.0367
Q02985	Complement factor H-related protein 3	CFHR3	NaN	NaN	26.3425	NaN	NaN	26.3262	NaN	NaN	NaN	NaN	NaN	NaN	NaN	NaN	NaN	NaN	NaN	NaN	NaN	NaN	NaN	NaN	NaN	NaN	NaN	NaN	NaN	NaN	NaN	NaN	26.5505	NaN	NaN	NaN	NaN	NaN	NaN	NaN	NaN	NaN	NaN	NaN	NaN	NaN	NaN	NaN	NaN
Q92496	Complement factor H-related protein 4	CFHR4	NaN	NaN	NaN	NaN	NaN	NaN	NaN	NaN	23.2626	NaN	NaN	NaN	NaN	NaN	NaN	NaN	NaN	NaN	NaN	NaN	NaN	NaN	NaN	NaN	NaN	NaN	NaN	NaN	NaN	NaN	NaN	NaN	NaN	NaN	NaN	NaN	NaN	NaN	NaN	NaN	NaN	NaN	NaN	NaN	NaN	NaN	NaN
Q9BXR6	Complement factor H-related protein 5	CFHR5	26.6164	28.1695	29.6026	NaN	29.4967	29.0909	27.6051	30.0288	28.8136	28.3283	28.6899	29.3416	NaN	NaN	NaN	NaN	NaN	28.7973	NaN	NaN	NaN	NaN	26.1637	27.4923	NaN	NaN	NaN	NaN	27.4851	NaN	29.5843	27.8046	29.0807	NaN	NaN	NaN	NaN	NaN	NaN	NaN	NaN	NaN	NaN	NaN	NaN	27.9233	NaN
P05156	Complement factor I;Complement factor I heavy chain;Complement factor I light chain	CFI	29.0378	29.8226	30.307	28.8395	31.9003	31.4952	32.0238	31.4107	31.8979	31.4097	32.2337	30.0512	25.3833	NaN	24.0124	NaN	26.496	NaN	26.5943	NaN	NaN	NaN	28.1426	29.4292	29.0475	28.6445	30.6766	30.1171	31.1678	31.1267	31.0297	30.8561	31.4662	NaN	24.1755	NaN	22.8371	24.6204	NaN	26.4038	NaN	NaN	23.7289	25.808	25.1948	27.4833	27.5522
P23528	Cofilin-1	CFL1	30.7778	31.1133	27.6711	31.2524	26.4147	28.0058	25.5252	26.135	26.1505	25.1926	24.6281	28.0398	29.1683	29.0934	29.1208	27.8261	26.2088	27.7033	NaN	27.3653	27.8294	28.5019	30.3742	28.7992	29.8499	28.5954	27.1577	NaN	26.1603	25.7554	27.9847	NaN	26.5189	30.2916	28.8877	28.3449	30.7155	27.5901	28.3613	28.6586	28.464	28.4844	28.3393	NaN	30.115	29.5247	28.7938
Q9Y281	Cofilin-2	CFL2	28.6194	25.4989	NaN	30.0508	23.7344	NaN	NaN	NaN	NaN	NaN	NaN	NaN	24.671	NaN	25.39	23.5237	23.5765	26.7295	NaN	NaN	NaN	26.0149	26.0141	NaN	25.5222	NaN	NaN	NaN	NaN	NaN	NaN	NaN	NaN	26.2558	NaN	NaN	NaN	NaN	NaN	NaN	NaN	NaN	NaN	NaN	NaN	NaN	NaN
P27918	Properdin	CFP	25.7538	26.4038	27.7301	24.5361	27.0166	27.8018	26.137	28.5013	26.7484	26.3213	26.1154	27.5915	NaN	NaN	NaN	NaN	NaN	NaN	NaN	NaN	NaN	NaN	26.2892	26.0497	NaN	NaN	25.1623	NaN	25.0672	NaN	26.3354	NaN	25.7949	NaN	NaN	NaN	NaN	NaN	NaN	NaN	NaN	NaN	NaN	NaN	NaN	NaN	NaN
Q99674	Cell growth regulator with EF hand domain protein 1	CGREF1	25.6311	NaN	NaN	24.695	NaN	NaN	26.1463	NaN	NaN	25.5568	25.1275	25.2836	NaN	NaN	NaN	27.0147	NaN	26.3247	NaN	NaN	NaN	26.5364	NaN	NaN	NaN	NaN	NaN	NaN	NaN	NaN	NaN	NaN	NaN	NaN	NaN	NaN	NaN	25.6176	25.8286	NaN	NaN	NaN	NaN	26.6772	NaN	NaN	26.5303
O15335	Chondroadherin	CHAD	34.3365	31.1543	34.3108	28.9406	36.2519	35.3251	35.8727	34.1881	33.5098	35.3447	34.347	37.7823	38.5136	37.528	36.7101	38.0385	37.63	37.4493	36.8225	37.0497	37.0037	37.5954	36.6674	37.6494	35.8669	36.5861	37.5592	37.127	36.014	36.8954	35.0298	35.5674	35.095	36.178	38.9153	37.2271	37.041	37.7271	37.1756	38.17	38.0304	37.9317	38.1195	37.1939	37.4739	37.3291	36.1569
Q6NUI6	Chondroadherin-like protein	CHADL	24.2516	25.5231	25.4984	NaN	26.5872	26.8527	26.389	26.7829	26.3481	27.4466	26.348	27.2741	27.1804	26.0908	NaN	27.8781	27.9272	28.7435	28.5828	28.5151	28.3726	27.3517	26.6937	27.5113	27.1691	28.3441	28.1922	27.3652	26.7812	27.3887	26.7336	27.9861	27.2344	NaN	27.7073	NaN	26.6982	27.9995	28.1469	28.5779	29.0362	28.4573	28.7313	28.6744	26.3929	27.8838	27.0595
Q9Y6H1;Q5T1J5	Coiled-coil-helix-coiled-coil-helix domain-containing protein 2;Putative coiled-coil-helix-coiled-coil-helix domain-containing protein CHCHD2P9, mitochondrial	CHCHD2;CHCHD2P9	NaN	NaN	NaN	NaN	NaN	NaN	NaN	NaN	NaN	NaN	NaN	NaN	NaN	NaN	NaN	NaN	NaN	NaN	NaN	NaN	NaN	NaN	NaN	NaN	NaN	NaN	NaN	23.6677	NaN	NaN	NaN	NaN	NaN	NaN	NaN	NaN	NaN	NaN	NaN	NaN	NaN	NaN	NaN	NaN	NaN	NaN	NaN
Q9NX63	MICOS complex subunit MIC19	CHCHD3	26.7849	26.4148	NaN	27.548	NaN	NaN	NaN	NaN	NaN	NaN	NaN	NaN	NaN	NaN	25.5869	NaN	NaN	NaN	NaN	NaN	NaN	NaN	NaN	NaN	NaN	NaN	NaN	NaN	NaN	NaN	NaN	NaN	NaN	NaN	NaN	NaN	25.6486	NaN	NaN	NaN	NaN	NaN	NaN	NaN	NaN	NaN	NaN
Q8N4Q1	Mitochondrial intermembrane space import and assembly protein 40	CHCHD4	NaN	NaN	NaN	25.2043	NaN	NaN	NaN	NaN	NaN	NaN	NaN	NaN	NaN	NaN	NaN	NaN	NaN	NaN	NaN	NaN	NaN	NaN	NaN	NaN	NaN	NaN	NaN	NaN	NaN	NaN	NaN	NaN	NaN	NaN	NaN	NaN	NaN	NaN	NaN	NaN	NaN	NaN	NaN	NaN	NaN	NaN	NaN
Q3L8U1;Q9HCK8;Q9P2D1	Chromodomain-helicase-DNA-binding protein 9;Chromodomain-helicase-DNA-binding protein 8;Chromodomain-helicase-DNA-binding protein 7	CHD9;CHD8;CHD7	25.6784	25.9785	NaN	27.2915	23.97	NaN	NaN	NaN	NaN	NaN	23.8041	27.6572	26.6147	27.1935	28.1965	25.1711	26.0749	25.3367	NaN	NaN	NaN	NaN	NaN	25.8191	27.1147	27.1164	NaN	26.8758	NaN	25.9563	NaN	NaN	NaN	28.4909	27.1636	30.3542	28.1984	NaN	NaN	NaN	NaN	NaN	NaN	NaN	28.6924	26.7257	26.3781
P10645	Chromogranin-A;Vasostatin-1;Vasostatin-2;EA-92;ES-43;Pancreastatin;SS-18;WA-8;WE-14;LF-19;Catestatin;AL-11;GV-19;GR-44;ER-37;GE-25;Serpinin-RRG;Serpinin;p-Glu serpinin precursor	CHGA	NaN	NaN	NaN	NaN	23.3088	NaN	NaN	NaN	NaN	NaN	23.0721	NaN	NaN	NaN	NaN	NaN	NaN	NaN	NaN	NaN	NaN	NaN	NaN	NaN	NaN	NaN	NaN	NaN	NaN	NaN	NaN	NaN	NaN	NaN	NaN	NaN	NaN	NaN	NaN	NaN	NaN	NaN	NaN	NaN	NaN	NaN	NaN
P36222	Chitinase-3-like protein 1	CHI3L1	28.2287	27.9427	27.2537	27.5578	28.251	28.3943	29.5328	28.4656	28.3131	29.2207	28.8701	27.9998	25.1988	25.0188	NaN	27.7681	26.8156	27.6399	28.0404	28.1107	28.2799	27.5483	27.1696	27.3586	NaN	27.191	28.9819	28.7509	28.1346	28.7011	27.8071	28.2042	27.8487	NaN	27.711	NaN	NaN	NaN	NaN	27.6051	NaN	NaN	NaN	25.5323	27.2218	28.7351	29.1083
Q15782	Chitinase-3-like protein 2	CHI3L2	NaN	25.3953	26.268	25.7911	26.8662	26.58	28.7338	28.3534	28.0653	27.982	29.2767	NaN	NaN	NaN	26.5261	26.1175	NaN	26.8198	NaN	28.3185	28.0669	26.7462	25.0887	26.2249	NaN	24.9645	28.1511	NaN	28.5092	27.5399	28.011	26.6484	28.6274	NaN	NaN	NaN	NaN	NaN	26.7	NaN	24.7838	NaN	NaN	25.3293	25.7003	NaN	NaN
Q9BWS9	Chitinase domain-containing protein 1	CHID1	24.3516	24.706	25.797	24.2257	25.5099	25.5831	24.9386	NaN	23.8419	25.5491	25.0807	NaN	NaN	NaN	NaN	26.0252	NaN	26.4358	25.0377	25.3292	NaN	26.5293	25.0344	26.2606	26.3177	26.38	25.3285	NaN	24.555	26.1005	26.2059	25.9452	NaN	NaN	NaN	NaN	26.1103	NaN	NaN	NaN	24.7693	24.7935	24.6675	25.4976	26.6865	25.9327	26.5339
O00533	Neural cell adhesion molecule L1-like protein;Processed neural cell adhesion molecule L1-like protein	CHL1	NaN	NaN	NaN	NaN	NaN	NaN	23.0411	NaN	NaN	NaN	NaN	NaN	NaN	NaN	NaN	NaN	NaN	NaN	NaN	NaN	NaN	NaN	NaN	NaN	NaN	NaN	NaN	NaN	NaN	NaN	NaN	NaN	NaN	NaN	NaN	NaN	NaN	NaN	NaN	NaN	NaN	NaN	NaN	NaN	NaN	NaN	NaN
O43633	Charged multivesicular body protein 2a	CHMP2A	24.9061	24.2293	NaN	24.478	NaN	NaN	NaN	NaN	NaN	NaN	NaN	NaN	NaN	NaN	NaN	NaN	NaN	NaN	NaN	NaN	NaN	NaN	NaN	NaN	NaN	NaN	NaN	NaN	NaN	NaN	NaN	NaN	NaN	NaN	NaN	NaN	NaN	NaN	NaN	NaN	NaN	NaN	NaN	NaN	NaN	NaN	NaN
Q9BY43	Charged multivesicular body protein 4a	CHMP4A	NaN	NaN	NaN	24.4099	NaN	NaN	NaN	NaN	NaN	NaN	NaN	NaN	NaN	NaN	NaN	NaN	NaN	NaN	NaN	NaN	NaN	NaN	NaN	NaN	NaN	NaN	NaN	NaN	NaN	NaN	NaN	NaN	NaN	NaN	NaN	NaN	NaN	NaN	NaN	NaN	NaN	NaN	NaN	NaN	NaN	NaN	NaN
Q9H444	Charged multivesicular body protein 4b	CHMP4B	23.6995	24.4375	NaN	NaN	NaN	NaN	NaN	NaN	NaN	NaN	NaN	NaN	NaN	NaN	NaN	NaN	NaN	NaN	NaN	NaN	NaN	NaN	NaN	NaN	NaN	NaN	NaN	NaN	NaN	NaN	NaN	NaN	NaN	NaN	NaN	NaN	NaN	NaN	NaN	NaN	NaN	NaN	NaN	NaN	NaN	NaN	NaN
Q9NZZ3	Charged multivesicular body protein 5	CHMP5	22.438	NaN	NaN	NaN	NaN	NaN	NaN	NaN	NaN	NaN	NaN	NaN	NaN	NaN	NaN	NaN	NaN	NaN	NaN	NaN	NaN	NaN	NaN	NaN	NaN	NaN	NaN	NaN	NaN	NaN	NaN	NaN	NaN	NaN	NaN	NaN	NaN	NaN	NaN	NaN	NaN	NaN	NaN	NaN	NaN	NaN	NaN
Q96FZ7	Charged multivesicular body protein 6	CHMP6	22.1408	NaN	NaN	NaN	NaN	NaN	NaN	NaN	NaN	NaN	NaN	NaN	NaN	NaN	NaN	NaN	NaN	NaN	NaN	NaN	NaN	NaN	NaN	NaN	NaN	NaN	NaN	NaN	NaN	NaN	NaN	NaN	NaN	NaN	NaN	NaN	NaN	NaN	NaN	NaN	NaN	NaN	NaN	NaN	NaN	NaN	NaN
Q99653	Calcineurin B homologous protein 1	CHP1	NaN	NaN	NaN	25.1747	NaN	NaN	NaN	NaN	NaN	NaN	NaN	NaN	NaN	NaN	NaN	NaN	NaN	NaN	NaN	NaN	NaN	NaN	NaN	NaN	NaN	NaN	NaN	NaN	NaN	NaN	NaN	NaN	NaN	NaN	NaN	NaN	NaN	NaN	NaN	NaN	NaN	NaN	NaN	NaN	NaN	NaN	NaN
Q8IZ52	Chondroitin sulfate synthase 2	CHPF	NaN	NaN	25.0733	NaN	24.2767	25.333	24.9113	NaN	25.4849	25.4481	24.8845	25.5655	23.6458	NaN	NaN	26.646	25.7833	26.3868	27.0764	26.4366	26.1467	26.1833	25.5377	25.794	NaN	26.2405	26.5092	26.5617	24.8077	26.1431	NaN	25.4938	NaN	NaN	25.2174	NaN	NaN	25.6329	NaN	26.3785	27.8545	NaN	NaN	26.8741	26.1495	25.3543	NaN
Q9H2X0	Chordin	CHRD	NaN	23.9665	26.2087	NaN	26.4053	26.7173	27.0993	27.0589	26.684	27.3574	26.5372	27.0388	25.8007	26.9706	26.2313	29.1662	28.2851	28.2669	28.6443	27.6159	27.719	27.9998	25.622	26.6906	NaN	27.5595	27.7323	28.7551	26.9267	26.6991	26.652	27.2796	27.2374	NaN	27.0837	NaN	27.2618	28.4785	29.3422	28.2548	28.1274	27.7356	28.9796	27.9604	26.1757	26.1962	26.9474
Q6WN34	Chordin-like protein 2	CHRDL2	24.4166	NaN	24.9013	NaN	28.7552	28.6443	27.7862	25.1234	25.5737	27.9412	23.9371	28.6272	29.2168	28.6069	27.0535	31.0251	31.5128	31.0274	31.6751	30.0478	30.253	30.855	26.9175	29.1162	28.9219	30.7745	30.966	30.5623	29.0562	29.4028	27.4773	29.6438	27.5501	28.0136	30.9577	26.0631	29.5166	31.8385	32.2165	31.6731	31.2943	30.0887	30.1241	31.4732	28.4578	30.6637	26.5574
P07510	Acetylcholine receptor subunit gamma	CHRNG	NaN	NaN	NaN	NaN	NaN	NaN	NaN	NaN	NaN	NaN	NaN	NaN	NaN	NaN	NaN	NaN	NaN	NaN	NaN	NaN	NaN	NaN	NaN	NaN	NaN	NaN	NaN	NaN	NaN	NaN	26.1799	NaN	NaN	NaN	NaN	NaN	NaN	NaN	NaN	NaN	NaN	NaN	NaN	NaN	NaN	NaN	NaN
O43916	Carbohydrate sulfotransferase 1	CHST1	NaN	NaN	NaN	NaN	NaN	NaN	NaN	NaN	NaN	NaN	NaN	NaN	NaN	NaN	NaN	NaN	NaN	NaN	NaN	NaN	NaN	NaN	NaN	NaN	NaN	NaN	NaN	NaN	NaN	NaN	NaN	NaN	NaN	NaN	NaN	NaN	NaN	NaN	NaN	NaN	NaN	NaN	NaN	NaN	NaN	NaN	24.2135
O43529	Carbohydrate sulfotransferase 10	CHST10	NaN	NaN	NaN	NaN	NaN	NaN	NaN	NaN	NaN	NaN	NaN	NaN	NaN	NaN	NaN	NaN	NaN	NaN	NaN	NaN	NaN	NaN	NaN	NaN	NaN	NaN	NaN	NaN	NaN	NaN	NaN	NaN	NaN	NaN	NaN	NaN	NaN	NaN	NaN	NaN	NaN	NaN	NaN	NaN	NaN	NaN	NaN
Q9NPF2	Carbohydrate sulfotransferase 11	CHST11	NaN	NaN	NaN	NaN	NaN	NaN	NaN	NaN	NaN	NaN	NaN	NaN	NaN	NaN	NaN	NaN	NaN	NaN	NaN	NaN	NaN	NaN	NaN	NaN	NaN	NaN	NaN	NaN	NaN	NaN	NaN	NaN	NaN	NaN	NaN	NaN	NaN	NaN	NaN	NaN	NaN	NaN	NaN	NaN	NaN	NaN	NaN
Q9NRB3	Carbohydrate sulfotransferase 12	CHST12	NaN	NaN	NaN	NaN	NaN	NaN	NaN	NaN	NaN	NaN	NaN	NaN	NaN	NaN	NaN	NaN	NaN	NaN	NaN	NaN	NaN	NaN	NaN	24.7495	NaN	NaN	NaN	NaN	NaN	NaN	NaN	NaN	NaN	NaN	NaN	NaN	NaN	NaN	NaN	NaN	NaN	NaN	NaN	NaN	NaN	NaN	NaN
Q8NCH0	Carbohydrate sulfotransferase 14	CHST14	NaN	24.9805	26.8679	NaN	24.8568	25.4067	NaN	24.8954	NaN	25.1986	26.2878	25.6557	25.4415	26.4836	NaN	26.8883	26.3607	27.2854	27.5319	26.8113	NaN	27.3729	26.6919	27.3208	27.4653	27.119	26.3966	26.1269	25.2575	25.814	25.7432	25.2134	26.5645	NaN	26.5603	26.9727	26.9237	26.9328	27.8349	26.4268	26.8787	25.9254	27.1505	27.2155	26.4948	27.0257	26.8567
Q7LGC8	Carbohydrate sulfotransferase 3	CHST3	27.1287	25.1017	28.7523	NaN	29.027	29.6175	29.655	29.3421	29.7924	30.5249	29.3099	28.9821	28.8478	29.6469	29.064	30.1312	29.9191	30.4543	30.889	29.7173	30.1122	30.0648	28.7162	29.3985	27.0734	30.1232	29.9481	30.1885	29.2365	29.7773	28.3727	29.9879	29.0908	26.4324	29.2673	NaN	29.1045	29.6879	30.1255	30.1977	30.6126	30.6251	30.0358	30.2474	30.5033	30.4229	29.639
Q9GZX3	Carbohydrate sulfotransferase 6	CHST6	NaN	NaN	26.1306	NaN	27.0388	26.9499	26.9375	27.2333	26.5175	27.5538	26.4037	26.7722	26.8591	26.4871	25.7096	28.2557	27.233	27.7544	27.7019	26.7696	25.3314	27.8252	26.6946	28.1398	26.9458	28.1149	27.9882	NaN	27.7375	28.3169	26.0302	26.6193	26.0761	NaN	27.3196	27.0949	NaN	26.9863	NaN	28.6333	28.3531	28.1807	28.6993	27.9912	28.2656	28.5897	27.5523
Q70JA7	Chondroitin sulfate synthase 3	CHSY3	NaN	NaN	NaN	NaN	NaN	26.7517	28.4205	NaN	NaN	NaN	NaN	27.8742	NaN	NaN	NaN	26.8173	NaN	27.7326	27.6743	NaN	NaN	27.9827	NaN	NaN	NaN	NaN	NaN	NaN	27.9697	NaN	NaN	26.3304	NaN	NaN	NaN	NaN	NaN	NaN	NaN	NaN	NaN	NaN	NaN	26.8387	NaN	NaN	NaN
O75339	Cartilage intermediate layer protein 1;Cartilage intermediate layer protein 1 C1;Cartilage intermediate layer protein 1 C2	CILP	35.8691	33.5417	36.4041	33.315	36.1483	36.7649	36.2551	35.6404	35.7884	36.7426	35.8733	37.2223	37.4461	37.1208	37.0393	36.8571	37.217	35.9358	36.2073	35.9279	36.0889	36.1771	37.5119	38.4158	35.9375	38.2335	37.6398	37.6433	36.3219	36.9508	35.1704	36.6779	35.7204	36.3074	37.1362	37.1546	36.7034	36.8925	36.8516	36.5625	36.403	36.0389	36.461	35.7579	38.9956	38.5575	37.3224
Q8IUL8	Cartilage intermediate layer protein 2;Cartilage intermediate layer protein 2 C1;Cartilage intermediate layer protein 2 C2	CILP2	34.399	32.9644	35.2316	33.5005	35.4912	34.9335	34.5877	34.0398	34.1577	34.7585	34.0596	36.4686	37.0456	36.5658	36.9332	36.2238	36.4608	35.5861	35.6213	35.2958	35.4487	35.3612	35.8102	36.8636	35.3957	36.7273	35.872	35.5997	34.6087	34.8779	33.8065	34.9788	34.2301	36.1829	36.3834	36.683	36.4798	36.3149	36.1525	35.6445	35.397	35.6018	35.9855	35.2302	37.1946	36.7953	35.8282
Q14011	Cold-inducible RNA-binding protein	CIRBP	25.1834	25.2075	26.0506	25.363	NaN	NaN	NaN	NaN	NaN	NaN	NaN	NaN	25.8143	NaN	25.3372	NaN	NaN	NaN	NaN	NaN	NaN	NaN	NaN	NaN	NaN	NaN	NaN	NaN	NaN	NaN	NaN	NaN	NaN	NaN	NaN	NaN	NaN	NaN	NaN	NaN	NaN	NaN	NaN	NaN	NaN	24.9603	25.7664
Q9NZ45	CDGSH iron-sulfur domain-containing protein 1	CISD1	25.3702	25.0392	NaN	26.2157	NaN	NaN	NaN	NaN	NaN	NaN	NaN	NaN	NaN	NaN	NaN	NaN	NaN	NaN	NaN	NaN	NaN	NaN	NaN	NaN	NaN	NaN	NaN	NaN	NaN	NaN	NaN	NaN	NaN	NaN	NaN	NaN	NaN	NaN	NaN	NaN	NaN	NaN	NaN	NaN	NaN	NaN	NaN
Q07065	Cytoskeleton-associated protein 4	CKAP4	28.4859	29.1578	25.795	28.1384	23.2661	25.2261	NaN	26.1585	NaN	NaN	NaN	26.2407	26.1456	25.7233	26.3104	25.8137	NaN	26.2665	NaN	NaN	25.6192	26.6134	27.3543	25.7031	26.5594	NaN	25.2267	NaN	24.1611	NaN	24.7555	NaN	NaN	27.6831	26.0117	NaN	27.7528	NaN	26.3428	NaN	25.9117	NaN	NaN	NaN	NaN	26.8905	26.1966
Q14008	Cytoskeleton-associated protein 5	CKAP5	NaN	22.3532	NaN	NaN	NaN	NaN	NaN	NaN	NaN	NaN	NaN	NaN	NaN	NaN	NaN	NaN	NaN	NaN	NaN	NaN	NaN	NaN	NaN	NaN	NaN	NaN	NaN	NaN	NaN	NaN	NaN	NaN	NaN	NaN	NaN	NaN	NaN	NaN	NaN	NaN	NaN	NaN	NaN	NaN	NaN	NaN	NaN
P12277	Creatine kinase B-type	CKB	26.5374	27.4332	26.6036	28.2289	26.6803	25.7878	NaN	25.9434	NaN	NaN	26.5636	27.7657	26.7048	28.6115	28.4317	28.5661	29.0104	29.2235	28.7048	29.2483	28.6742	28.9142	25.8668	26.905	27.5617	27.2848	27.4847	27.175	26.8491	26.4157	24.6734	26.2039	NaN	28.6943	27.4816	29.3791	29.4481	28.1616	28.7124	29.5704	28.2692	28.4691	28.6003	29.5187	27.9273	26.3455	27.7477
P06732	Creatine kinase M-type;Creatine kinase M-type, N-terminally processed	CKM	35.443	30.9789	24.6275	36.1055	29.504	25.8378	26.2366	26.8007	25.322	26.6345	26.7372	32.0069	33.0718	32.0704	34.464	31.4901	32.3193	32.164	32.1149	30.6186	31.1455	31.5454	31.5738	30.4616	27.5246	30.4377	28.6843	NaN	27.0246	27.3087	26.9722	27.7325	27.5674	34.0777	31.2823	30.8215	34.3842	32.7606	31.3749	31.8007	31.0846	31.8736	30.0572	30.7725	30.2262	26.6678	25.9457
P17540	Creatine kinase S-type, mitochondrial	CKMT2	29.532	22.8742	NaN	30.4441	23.0291	22.5947	21.5881	NaN	21.2051	NaN	NaN	NaN	25.6583	NaN	23.4712	22.5934	NaN	NaN	NaN	NaN	NaN	NaN	NaN	NaN	NaN	NaN	NaN	NaN	NaN	NaN	NaN	NaN	NaN	24.6359	NaN	NaN	NaN	NaN	NaN	NaN	18.3533	NaN	NaN	NaN	NaN	NaN	NaN
Q05315	Galectin-10	CLC	24.8962	24.6152	NaN	24.8963	NaN	NaN	NaN	NaN	NaN	NaN	NaN	NaN	NaN	NaN	NaN	NaN	NaN	NaN	NaN	NaN	NaN	NaN	NaN	NaN	NaN	NaN	NaN	NaN	NaN	NaN	NaN	NaN	NaN	NaN	NaN	NaN	NaN	NaN	NaN	NaN	NaN	NaN	NaN	NaN	24.8237	NaN	NaN
Q9Y240	C-type lectin domain family 11 member A	CLEC11A	28.8445	29.0066	30.1251	27.3431	29.5176	29.9863	30.6154	30.0133	29.8253	30.8998	30.5358	30.0953	31.0111	31.1743	29.7765	29.4721	29.5883	30.2166	29.2991	29.3373	28.5946	30.4244	30.1609	30.8667	30.5121	30.874	31.103	31.7966	30.5189	31.0162	29.3764	30.8658	29.7178	29.4237	30.8598	29.9987	30.2916	29.8229	30.0556	29.6094	29.8057	29.3143	30.9919	30.112	30.6712	30.8215	30.9664
Q86T13	C-type lectin domain family 14 member A	CLEC14A	NaN	NaN	NaN	NaN	NaN	NaN	NaN	NaN	NaN	NaN	NaN	NaN	NaN	NaN	NaN	NaN	NaN	NaN	NaN	NaN	NaN	NaN	NaN	NaN	NaN	NaN	NaN	NaN	NaN	NaN	NaN	NaN	NaN	NaN	NaN	NaN	NaN	NaN	NaN	NaN	NaN	NaN	NaN	NaN	NaN	NaN	NaN
O75596	C-type lectin domain family 3 member A	CLEC3A	31.5919	26.7954	28.5813	25.4707	32.5897	30.1671	30.3129	28.7502	28.3175	30.0208	27.1576	34.0061	35.0684	34.2488	34.6893	34.6674	34.2126	34.1566	34.256	33.9237	34.2093	34.5407	32.954	32.9634	31.2265	33.7288	33.5073	33.256	30.8747	30.9937	29.3321	31.1652	28.3083	33.513	34.6882	33.4786	33.7547	34.0317	34.27	34.5624	34.1462	34.1417	34.4854	34.2038	34.0242	33.3793	30.08
P05452	Tetranectin	CLEC3B	31.1095	31.3165	30.6882	30.6687	30.9285	30.8743	30.7712	30.797	30.6349	31.3926	30.1806	29.7759	30.2349	30.8948	30.2582	31.3867	30.3901	31.4257	31.6664	31.5701	31.7654	31.8747	30.9208	31.0926	31.5515	29.9691	31.5076	29.68	30.7637	30.6128	30.1669	30.2057	29.9537	30.6397	30.0935	29.3874	30.5046	30.684	30.6366	31.685	31.8928	31.904	31.6219	31.4439	28.9973	31.0766	28.5884
O00299	Chloride intracellular channel protein 1	CLIC1	28.3046	29.591	27.4777	28.4319	26.1148	26.7652	25.3309	27.1803	25.1179	NaN	23.6105	26.9763	27.3621	27.7735	27.7102	27.1658	25.7852	26.4986	26.0172	NaN	26.3984	27.3008	28.3739	27.2247	28.8566	27.4336	25.5193	23.9633	25.5518	24.9879	27.0709	NaN	26.0004	28.4299	27.9173	NaN	28.8817	27.2691	27.1431	24.5556	NaN	NaN	24.7426	NaN	27.8677	27.6151	27.0471
O15247	Chloride intracellular channel protein 2	CLIC2	25.2662	24.0765	NaN	25.755	NaN	NaN	NaN	NaN	NaN	NaN	NaN	NaN	NaN	NaN	NaN	NaN	NaN	NaN	NaN	NaN	NaN	NaN	NaN	NaN	NaN	NaN	NaN	NaN	NaN	26.9025	NaN	NaN	NaN	NaN	NaN	NaN	NaN	NaN	NaN	NaN	NaN	NaN	NaN	NaN	NaN	NaN	NaN
O95833	Chloride intracellular channel protein 3	CLIC3	NaN	NaN	NaN	NaN	NaN	NaN	NaN	NaN	NaN	NaN	NaN	NaN	NaN	NaN	NaN	NaN	NaN	NaN	NaN	NaN	NaN	NaN	NaN	NaN	NaN	NaN	NaN	NaN	NaN	NaN	NaN	NaN	NaN	NaN	NaN	NaN	NaN	NaN	NaN	NaN	NaN	NaN	NaN	NaN	NaN	NaN	NaN
Q9Y696	Chloride intracellular channel protein 4	CLIC4	25.3885	27.8411	26.1146	25.9559	25.5896	25.5515	24.3987	NaN	NaN	25.6008	23.9419	25.5891	26.3732	26.6695	26.8266	26.0008	26.945	25.4094	26.7568	NaN	25.9568	25.7746	26.5742	26.2349	27.2709	26.3231	25.7082	25.9323	24.0718	25.1193	25.6568	25.8944	24.7476	27.1395	26.9936	27.1406	27.529	27.3857	NaN	NaN	NaN	25.5678	NaN	NaN	26.0928	27.1039	26.0934
Q9NZA1	Chloride intracellular channel protein 5	CLIC5	NaN	NaN	NaN	23.9498	NaN	NaN	NaN	NaN	NaN	NaN	NaN	NaN	NaN	NaN	NaN	NaN	NaN	NaN	NaN	NaN	NaN	NaN	NaN	NaN	NaN	NaN	NaN	NaN	NaN	NaN	NaN	NaN	NaN	NaN	NaN	NaN	NaN	NaN	NaN	NaN	NaN	NaN	NaN	NaN	NaN	NaN	NaN
Q96NY7	Chloride intracellular channel protein 6	CLIC6	26.1717	26.1695	NaN	25.7341	NaN	NaN	NaN	NaN	NaN	NaN	NaN	NaN	NaN	NaN	NaN	NaN	NaN	NaN	NaN	NaN	NaN	NaN	NaN	NaN	NaN	NaN	NaN	NaN	NaN	NaN	NaN	NaN	NaN	NaN	NaN	NaN	NaN	NaN	24.4628	NaN	NaN	NaN	NaN	NaN	NaN	NaN	NaN
Q14677	Clathrin interactor 1	CLINT1	22.5409	24.3623	NaN	NaN	NaN	NaN	NaN	NaN	NaN	NaN	NaN	NaN	NaN	NaN	NaN	NaN	NaN	NaN	NaN	NaN	NaN	NaN	NaN	NaN	NaN	NaN	NaN	NaN	NaN	NaN	NaN	NaN	NaN	NaN	NaN	NaN	NaN	NaN	NaN	NaN	NaN	NaN	NaN	NaN	NaN	NaN	NaN
P30622	CAP-Gly domain-containing linker protein 1	CLIP1	NaN	NaN	NaN	24.1096	NaN	NaN	NaN	NaN	NaN	NaN	NaN	NaN	NaN	NaN	NaN	NaN	NaN	NaN	NaN	NaN	NaN	NaN	NaN	NaN	NaN	NaN	NaN	NaN	NaN	NaN	NaN	NaN	NaN	NaN	NaN	NaN	NaN	NaN	NaN	NaN	NaN	NaN	NaN	NaN	NaN	NaN	NaN
Q9UDT6	CAP-Gly domain-containing linker protein 2	CLIP2	NaN	NaN	NaN	NaN	NaN	NaN	NaN	NaN	NaN	NaN	NaN	NaN	NaN	NaN	NaN	NaN	NaN	NaN	NaN	NaN	NaN	NaN	NaN	NaN	NaN	NaN	NaN	NaN	NaN	NaN	NaN	NaN	NaN	NaN	NaN	NaN	NaN	NaN	NaN	NaN	NaN	NaN	NaN	NaN	NaN	NaN	NaN
O75503	Ceroid-lipofuscinosis neuronal protein 5	CLN5	NaN	NaN	NaN	NaN	NaN	NaN	NaN	NaN	26.2437	NaN	NaN	NaN	NaN	NaN	NaN	27.1407	NaN	27.7799	NaN	27.1275	NaN	NaN	NaN	NaN	NaN	NaN	NaN	NaN	NaN	NaN	NaN	NaN	NaN	NaN	NaN	NaN	NaN	27.2041	NaN	NaN	27.6035	NaN	NaN	26.9711	27.1472	NaN	NaN
O94985	Calsyntenin-1;Soluble Alc-alpha;CTF1-alpha	CLSTN1	25.2597	25.2969	NaN	24.7021	26.6464	26.36	28.0569	25.5287	25.3432	27.5132	27.8008	26.4134	26.8318	27.7763	NaN	28.9899	29.2937	29.7768	29.4337	29.0885	29.9534	30.0358	25.1632	26.8316	25.7578	NaN	28.0157	28.3734	27.819	27.9461	NaN	27.9409	27.1826	25.6755	27.9143	27.545	27.8636	27.9888	28.6647	30.0435	28.6843	29.4774	28.9981	29.1734	26.4505	26.6686	27.8055
Q9H4D0	Calsyntenin-2	CLSTN2	NaN	NaN	NaN	NaN	NaN	NaN	NaN	NaN	NaN	NaN	NaN	NaN	NaN	NaN	NaN	27.3813	28.0314	27.6872	28.1198	27.3423	27.0218	27.401	NaN	NaN	NaN	NaN	NaN	NaN	NaN	NaN	NaN	NaN	NaN	NaN	25.5221	NaN	NaN	28.9792	27.766	28.6495	29.2464	NaN	27.9146	28.2798	NaN	NaN	NaN
P09496	Clathrin light chain A	CLTA	NaN	NaN	NaN	26.0875	NaN	NaN	NaN	NaN	NaN	NaN	NaN	NaN	NaN	NaN	NaN	NaN	NaN	NaN	NaN	NaN	NaN	NaN	NaN	NaN	NaN	NaN	NaN	NaN	NaN	NaN	NaN	NaN	NaN	NaN	NaN	NaN	NaN	NaN	NaN	NaN	NaN	NaN	NaN	NaN	NaN	NaN	NaN
P09497	Clathrin light chain B	CLTB	26.9339	26.7121	NaN	27.1585	NaN	NaN	NaN	NaN	NaN	NaN	NaN	NaN	NaN	NaN	NaN	NaN	NaN	NaN	NaN	NaN	NaN	NaN	NaN	NaN	NaN	NaN	NaN	NaN	NaN	NaN	NaN	NaN	NaN	NaN	NaN	NaN	NaN	NaN	NaN	NaN	NaN	NaN	NaN	NaN	NaN	NaN	NaN
Q00610	Clathrin heavy chain 1	CLTC	30.5687	30.19	24.5695	28.301	25.0844	25.1338	23.2638	23.0286	NaN	24.9489	23.9809	25.7852	28.2	25.6411	26.1969	26.6777	24.2683	25.7964	24.8268	24.5479	26.1561	25.9472	29.5515	27.6067	26.4352	26.3253	25.5692	25.4692	23.7375	23.667	20.9625	NaN	24.1565	26.1139	26.8715	26.0923	26.5912	23.3653	24.6772	24.8915	NaN	NaN	NaN	25.7603	24.7186	25.9718	23.1469
P10909	Clusterin;Clusterin beta chain;Clusterin alpha chain	CLU	36.51	35.5156	38.0496	33.7003	37.6089	37.973	37.7596	37.1089	37.4781	37.7603	38.1662	36.8157	36.6381	36.8225	36.4558	36.9709	36.8342	36.5513	35.9848	36.3846	35.9108	36.2753	37.4465	38.6261	37.2279	37.9926	38.0122	38.0203	37.9708	38.0074	37.3181	37.3496	37.0766	35.8179	36.9174	36.3786	35.7397	37.2553	36.6422	36.5631	36.0831	35.8803	35.933	36.0581	38.5251	38.438	38.5095
P23946	Chymase	CMA1	27.8073	27.2994	NaN	28.42	NaN	NaN	NaN	NaN	NaN	NaN	NaN	NaN	NaN	NaN	NaN	NaN	NaN	NaN	NaN	NaN	NaN	NaN	NaN	NaN	NaN	NaN	NaN	NaN	NaN	NaN	NaN	NaN	NaN	NaN	NaN	NaN	NaN	NaN	NaN	NaN	NaN	NaN	NaN	NaN	NaN	NaN	NaN
Q8NFW8	N-acylneuraminate cytidylyltransferase	CMAS	24.1502	23.9954	NaN	NaN	NaN	NaN	NaN	NaN	NaN	NaN	NaN	NaN	NaN	NaN	NaN	NaN	NaN	NaN	NaN	NaN	NaN	NaN	NaN	NaN	NaN	NaN	NaN	NaN	NaN	NaN	NaN	NaN	NaN	NaN	NaN	NaN	NaN	NaN	NaN	NaN	NaN	NaN	NaN	NaN	NaN	NaN	NaN
Q96DG6	Carboxymethylenebutenolidase homolog	CMBL	25.63	NaN	NaN	24.6884	NaN	NaN	NaN	NaN	NaN	NaN	NaN	NaN	NaN	NaN	NaN	NaN	NaN	NaN	NaN	NaN	25.4541	NaN	NaN	NaN	NaN	NaN	NaN	NaN	NaN	NaN	NaN	NaN	NaN	25.8631	NaN	NaN	26.096	NaN	NaN	NaN	NaN	NaN	NaN	NaN	NaN	NaN	NaN
P30085	UMP-CMP kinase	CMPK1	26.0685	27.8086	25.1916	27.1445	25.6073	25.1058	NaN	NaN	NaN	27.1027	NaN	26.7599	26.3185	NaN	NaN	24.9834	NaN	NaN	NaN	NaN	NaN	NaN	27.5565	NaN	27.4148	NaN	NaN	NaN	NaN	NaN	NaN	NaN	NaN	30.9708	NaN	NaN	NaN	NaN	NaN	NaN	NaN	NaN	NaN	NaN	NaN	27.2421	NaN
P62633	Cellular nucleic acid-binding protein	CNBP	NaN	NaN	NaN	NaN	NaN	NaN	NaN	NaN	NaN	NaN	NaN	NaN	NaN	NaN	NaN	NaN	NaN	NaN	NaN	NaN	NaN	NaN	NaN	NaN	NaN	NaN	NaN	NaN	NaN	NaN	NaN	NaN	NaN	NaN	NaN	NaN	NaN	NaN	NaN	NaN	NaN	NaN	NaN	NaN	NaN	NaN	NaN
Q96KN2	Beta-Ala-His dipeptidase	CNDP1	NaN	NaN	NaN	NaN	NaN	NaN	NaN	NaN	NaN	NaN	NaN	NaN	NaN	NaN	NaN	NaN	NaN	NaN	NaN	NaN	NaN	NaN	NaN	NaN	NaN	NaN	NaN	NaN	24.2903	NaN	NaN	NaN	NaN	NaN	NaN	NaN	NaN	NaN	NaN	NaN	NaN	NaN	NaN	NaN	NaN	NaN	NaN
Q96KP4	Cytosolic non-specific dipeptidase	CNDP2	28.2718	28.9798	23.1136	28.6201	23.2338	NaN	24.641	NaN	NaN	NaN	NaN	24.9283	25.3794	24.479	25.1335	24.4833	25.322	24.474	NaN	NaN	NaN	23.5905	26.0238	NaN	25.4922	NaN	NaN	NaN	NaN	NaN	NaN	25.6648	NaN	25.0642	NaN	NaN	25.5631	26.1358	NaN	NaN	NaN	NaN	NaN	NaN	26.7305	25.3416	24.857
Q16280	Cyclic nucleotide-gated olfactory channel	CNGA2	NaN	NaN	NaN	NaN	NaN	NaN	NaN	NaN	NaN	NaN	NaN	NaN	NaN	NaN	NaN	NaN	NaN	NaN	NaN	NaN	NaN	NaN	NaN	NaN	NaN	NaN	NaN	NaN	NaN	NaN	NaN	NaN	NaN	NaN	NaN	NaN	NaN	NaN	NaN	NaN	NaN	NaN	NaN	NaN	NaN	NaN	NaN
P51911	Calponin-1	CNN1	27.7352	28.0112	28.1725	28.9909	NaN	25.7009	NaN	NaN	NaN	NaN	28.5865	NaN	25.243	NaN	NaN	NaN	NaN	27.5181	NaN	NaN	NaN	NaN	NaN	NaN	NaN	NaN	NaN	NaN	28.2473	NaN	NaN	NaN	25.6793	NaN	NaN	NaN	NaN	NaN	NaN	NaN	NaN	NaN	NaN	NaN	NaN	NaN	NaN
Q15417	Calponin-3	CNN3	25.0236	25.9544	NaN	NaN	NaN	NaN	NaN	NaN	NaN	NaN	NaN	NaN	NaN	NaN	NaN	NaN	NaN	NaN	NaN	NaN	NaN	NaN	NaN	NaN	NaN	NaN	NaN	NaN	NaN	NaN	NaN	NaN	NaN	NaN	NaN	NaN	NaN	NaN	NaN	NaN	NaN	NaN	NaN	NaN	NaN	NaN	NaN
P09543	2,3-cyclic-nucleotide 3-phosphodiesterase	CNP	24.9432	25.0015	NaN	NaN	NaN	NaN	NaN	NaN	NaN	NaN	NaN	NaN	NaN	NaN	NaN	NaN	NaN	NaN	NaN	NaN	NaN	NaN	25.739	NaN	NaN	NaN	NaN	NaN	NaN	NaN	NaN	NaN	NaN	NaN	NaN	NaN	NaN	NaN	NaN	NaN	NaN	NaN	NaN	NaN	NaN	25.57	NaN
Q9Y2B0	Protein canopy homolog 2	CNPY2	25.9673	26.8008	NaN	25.4078	NaN	NaN	NaN	NaN	NaN	NaN	NaN	24.6429	NaN	NaN	24.4581	NaN	NaN	NaN	NaN	23.8154	NaN	24.833	24.7903	NaN	NaN	NaN	NaN	NaN	NaN	NaN	NaN	NaN	NaN	NaN	NaN	NaN	NaN	NaN	NaN	NaN	NaN	NaN	NaN	NaN	NaN	NaN	NaN
Q9BT09	Protein canopy homolog 3	CNPY3	23.0066	23.686	NaN	NaN	NaN	NaN	NaN	23.9127	NaN	NaN	NaN	NaN	NaN	NaN	NaN	NaN	NaN	NaN	NaN	NaN	NaN	NaN	23.5078	NaN	NaN	NaN	NaN	NaN	NaN	NaN	NaN	NaN	NaN	NaN	NaN	NaN	NaN	NaN	NaN	NaN	NaN	NaN	NaN	NaN	NaN	NaN	NaN
Q8N129	Protein canopy homolog 4	CNPY4	25.0133	25.1238	NaN	25.2972	NaN	NaN	NaN	NaN	NaN	NaN	NaN	NaN	NaN	NaN	NaN	NaN	NaN	NaN	NaN	NaN	NaN	NaN	NaN	NaN	NaN	NaN	NaN	NaN	NaN	NaN	NaN	NaN	NaN	NaN	NaN	NaN	NaN	NaN	NaN	NaN	NaN	NaN	NaN	NaN	NaN	NaN	NaN
Q96F85	CB1 cannabinoid receptor-interacting protein 1	CNRIP1	24.5411	NaN	NaN	NaN	NaN	NaN	NaN	NaN	NaN	NaN	NaN	NaN	NaN	NaN	NaN	NaN	NaN	NaN	NaN	NaN	NaN	NaN	NaN	NaN	NaN	NaN	NaN	NaN	NaN	NaN	NaN	NaN	NaN	NaN	NaN	NaN	NaN	NaN	NaN	NaN	NaN	NaN	NaN	NaN	NaN	NaN	NaN
Q12860	Contactin-1	CNTN1	NaN	NaN	NaN	NaN	NaN	NaN	NaN	22.7423	NaN	NaN	NaN	NaN	NaN	NaN	NaN	NaN	NaN	NaN	NaN	NaN	NaN	NaN	NaN	NaN	NaN	NaN	NaN	NaN	NaN	NaN	NaN	NaN	NaN	NaN	NaN	NaN	NaN	NaN	NaN	NaN	NaN	NaN	NaN	NaN	NaN	NaN	NaN
Q9Y2R0	Cytochrome c oxidase assembly factor 3 homolog, mitochondrial	COA3	NaN	NaN	NaN	NaN	NaN	NaN	NaN	NaN	NaN	NaN	NaN	NaN	NaN	NaN	NaN	NaN	NaN	NaN	NaN	NaN	NaN	NaN	NaN	NaN	NaN	NaN	NaN	NaN	NaN	NaN	NaN	NaN	NaN	NaN	NaN	NaN	NaN	NaN	NaN	NaN	NaN	NaN	NaN	NaN	NaN	NaN	NaN
Q5JTJ3	Cytochrome c oxidase assembly factor 6 homolog	COA6	NaN	NaN	NaN	NaN	NaN	NaN	NaN	NaN	NaN	NaN	NaN	NaN	NaN	NaN	NaN	NaN	NaN	NaN	NaN	NaN	NaN	NaN	NaN	NaN	NaN	NaN	NaN	NaN	NaN	NaN	NaN	NaN	NaN	NaN	NaN	NaN	NaN	NaN	NaN	NaN	NaN	NaN	NaN	NaN	NaN	NaN	NaN
O75128	Protein cordon-bleu	COBL	NaN	NaN	NaN	24.7746	NaN	NaN	NaN	NaN	NaN	NaN	NaN	NaN	NaN	NaN	NaN	NaN	NaN	NaN	NaN	NaN	NaN	NaN	NaN	NaN	NaN	NaN	NaN	NaN	NaN	NaN	NaN	NaN	NaN	NaN	NaN	NaN	NaN	NaN	NaN	NaN	NaN	NaN	NaN	NaN	NaN	NaN	NaN
O43405	Cochlin	COCH	NaN	NaN	NaN	NaN	NaN	NaN	24.4723	NaN	NaN	25.3074	NaN	NaN	NaN	NaN	NaN	NaN	NaN	NaN	NaN	NaN	NaN	NaN	NaN	NaN	NaN	NaN	NaN	NaN	24.4494	25.5806	NaN	NaN	NaN	NaN	NaN	NaN	NaN	NaN	NaN	NaN	NaN	NaN	NaN	NaN	NaN	NaN	NaN
Q9H9E3	Conserved oligomeric Golgi complex subunit 4	COG4	NaN	NaN	NaN	NaN	NaN	NaN	NaN	NaN	NaN	NaN	NaN	NaN	NaN	NaN	NaN	NaN	NaN	NaN	NaN	NaN	NaN	NaN	NaN	NaN	NaN	NaN	NaN	NaN	NaN	NaN	NaN	NaN	NaN	NaN	NaN	NaN	NaN	NaN	NaN	NaN	NaN	NaN	NaN	NaN	NaN	NaN	NaN
Q03692	Collagen alpha-1(X) chain	COL10A1	NaN	NaN	NaN	NaN	NaN	NaN	NaN	NaN	NaN	NaN	NaN	NaN	NaN	NaN	NaN	NaN	NaN	NaN	NaN	NaN	NaN	NaN	NaN	NaN	NaN	NaN	NaN	NaN	NaN	NaN	NaN	NaN	NaN	NaN	NaN	NaN	NaN	NaN	NaN	NaN	NaN	NaN	NaN	NaN	NaN	NaN	27.6761
P12107	Collagen alpha-1(XI) chain	COL11A1	28.2631	26.9298	29.0093	23.9227	30.5758	29.7603	29.9027	28.5716	28.9312	29.7053	29.5816	31.2311	31.6467	31.7816	31.5555	32.7644	33.0459	33.0872	33.2058	33.041	33.2395	33.349	30.0655	31.0491	30.9178	30.3392	31.6196	31.8181	30.4229	30.9707	28.9952	30.0806	29.7969	30.6204	32.0392	31.5432	31.8205	32.2582	32.7223	32.834	33.2518	33.0652	32.6381	32.6231	30.8415	31.0688	30.7137
P13942	Collagen alpha-2(XI) chain	COL11A2	28.7527	25.0531	30.0596	26.1282	31.9725	30.7353	30.5022	30.4139	30.5574	31.6005	30.6296	34.9362	34.5479	35.5266	34.6558	36.216	35.8969	35.8801	36.0341	35.7327	35.8196	36.1402	30.7558	31.5926	30.6637	32.382	32.4653	32.2494	31.217	31.4106	29.5749	31.5117	30.2529	33.2116	35.0032	35.3273	35.2569	35.5776	35.6854	36.2312	36.0586	36.0114	36.4096	35.9638	32.7549	32.5665	31.6224
Q99715	Collagen alpha-1(XII) chain	COL12A1	36.1284	37.0581	31.3867	34.9582	31.8392	31.3482	29.323	31.018	29.6268	29.8855	30.6202	33.6731	36.3302	34.1977	36.2707	32.1784	32.0765	32.7213	32.6822	32.4689	32.7122	32.6694	35.2939	33.2622	32.4102	31.1301	28.328	26.0695	29.3814	27.9383	30.1044	28.1336	29.3251	35.6164	36.0724	32.0161	35.5825	30.8146	31.17	32.0067	32.3778	31.8527	31.9327	32.4854	30.7164	34.2258	31.6931
Q05707	Collagen alpha-1(XIV) chain	COL14A1	36.1984	36.2991	29.091	35.2254	31.699	28.4088	28.0538	27.3371	28.3063	27.7932	28.1879	32.7034	35.0843	33.4091	35.3031	30.7895	30.8272	31.2338	31.972	30.7279	31.4317	31.268	34.5966	31.4371	28.0111	29.5981	29.3428	22.7926	28.0251	28.4216	26.4757	25.0439	27.7917	34.7611	34.7519	29.2998	34.7116	30.8855	30.8013	31.2994	31.7701	30.7498	30.87	30.7706	27.828	33.4447	27.1954
P39059	Collagen alpha-1(XV) chain;Restin;Restin-2;Restin-3;Restin-4	COL15A1	30.1908	30.8893	28.8196	30.3033	29.8783	29.8111	27.5219	29.2253	28.2726	28.0906	27.9185	31.4227	31.8352	30.9953	32.6109	31.9694	31.2476	32.2012	31.0303	31.5473	31.6086	31.9066	30.2841	29.0485	28.9075	29.3738	28.1311	28.4569	28.3335	27.9188	29.1434	28.8445	28.7137	32.1779	31.6627	30.4205	32.4496	31.6369	31.2055	31.2767	31.0736	31.4076	31.0654	32.1173	29.7326	30.0444	29.5409
Q07092	Collagen alpha-1(XVI) chain	COL16A1	24.9952	26.1726	NaN	24.8947	26.0103	25.0228	24.11	25.0818	NaN	NaN	NaN	26.2495	26.41	NaN	27.649	26.3197	26.8509	26.2738	28.2672	25.7544	NaN	25.9711	25.8309	26.4905	25.728	25.8113	26.1243	NaN	NaN	NaN	NaN	23.4907	NaN	25.9711	26.6209	NaN	24.6312	25.4339	24.2148	22.8459	NaN	NaN	NaN	25.3421	26.8794	26.8946	NaN
P39060	Collagen alpha-1(XVIII) chain;Endostatin	COL18A1	29.6394	29.4414	28.5476	30.0984	28.4652	29.1418	28.7555	28.8215	28.201	28.288	28.8169	28.6802	28.7089	28.478	28.1739	28.621	26.9742	27.9196	27.6861	27.1004	27.5999	28.0969	29.1732	29.1947	28.2897	29.1556	28.5881	29.0307	27.8865	28.1288	28.021	27.5692	27.363	28.882	28.6181	NaN	28.8725	28.5356	28.4451	28.367	30.1439	28.2862	29.9138	28.2511	29.1888	29.5068	28.118
P02452	Collagen alpha-1(I) chain	COL1A1	33.7854	34.0839	32.7809	34.1199	33.4385	32.5771	31.6292	31.5368	30.5036	31.5292	30.1666	34.8958	35.5229	35.6452	35.5772	32.1038	34.0936	31.3012	33.2699	32.9212	30.7136	28.2316	34.2149	33.6476	33.3523	34.2806	33.4841	33.1714	31.1989	31.2648	30.6622	31.9013	30.196	36.0427	36.2442	36.3944	35.2267	33.5309	33.5441	30.5984	32.5439	33.1106	31.0819	30.7024	34.9971	33.4038	33.8922
P08123	Collagen alpha-2(I) chain	COL1A2	35.1803	35.6103	35.4244	35.276	35.7681	35.546	34.8831	34.5668	33.8357	35.0324	34.2842	37.2273	37.2025	37.3225	38.0273	37.7622	38.0915	37.6225	37.0787	37.5937	37.0082	37.6562	36.2894	36.4812	35.8988	36.4991	36.6273	35.2794	35.1741	35.103	34.3043	34.9059	35.1304	37.2972	37.7119	38.7372	36.9968	37.5735	36.0289	37.2218	36.9001	36.4882	37.3873	37.0096	36.9051	36.1477	36.5853
Q8NFW1	Collagen alpha-1(XXII) chain	COL22A1	20.8839	NaN	NaN	NaN	NaN	NaN	NaN	NaN	NaN	NaN	NaN	NaN	NaN	NaN	NaN	NaN	NaN	NaN	NaN	NaN	NaN	NaN	NaN	NaN	NaN	NaN	NaN	NaN	NaN	NaN	NaN	NaN	NaN	NaN	NaN	NaN	NaN	NaN	NaN	NaN	NaN	NaN	NaN	NaN	NaN	NaN	NaN
Q8IZC6	Collagen alpha-1(XXVII) chain	COL27A1	NaN	NaN	NaN	NaN	NaN	NaN	NaN	NaN	NaN	NaN	NaN	NaN	NaN	NaN	NaN	NaN	NaN	NaN	NaN	NaN	NaN	NaN	NaN	NaN	NaN	NaN	NaN	NaN	NaN	NaN	NaN	NaN	NaN	NaN	NaN	NaN	NaN	NaN	NaN	NaN	NaN	NaN	NaN	NaN	NaN	NaN	NaN
Q2UY09	Collagen alpha-1(XXVIII) chain	COL28A1	27.1135	23.5142	NaN	25.7112	NaN	NaN	25.7977	NaN	NaN	NaN	23.8145	NaN	NaN	NaN	NaN	24.5552	NaN	NaN	NaN	NaN	NaN	NaN	NaN	NaN	NaN	NaN	NaN	NaN	NaN	NaN	NaN	NaN	NaN	NaN	NaN	NaN	NaN	NaN	NaN	NaN	NaN	NaN	NaN	NaN	NaN	24.0694	NaN
P02458	Collagen alpha-1(II) chain;Collagen alpha-1(II) chain;Chondrocalcin	COL2A1	32.6545	30.3187	34.628	30.2434	35.5986	34.769	33.9107	33.2464	33.0729	34.7171	32.7408	37.3004	37.0369	37.7076	37.4766	38.1783	38.0857	38.0634	37.8458	37.91	38.13	37.883	34.8994	36.0098	35.2665	35.9752	36.2336	36.0504	33.9491	34.7644	32.3839	34.6945	32.4776	36.0334	37.7423	36.8714	36.8545	37.8928	37.5442	37.8185	38.2537	38.1967	37.9815	37.6029	37.3056	36.6658	35.9804
P02461	Collagen alpha-1(III) chain	COL3A1	29.9745	29.8095	28.8316	28.8933	29.3945	29.0813	27.7331	28.4095	27.6694	29.0338	27.581	30.3554	30.3533	30.9319	31.2297	31.4437	31.8095	32.0883	31.6556	32.0877	32.4684	31.6582	31.0141	30.4792	28.8213	30.9602	30.8062	29.933	29.0682	29.4384	27.4604	28.8353	28.6037	30.5362	30.92	27.9389	31.7218	31.2216	31.923	31.7722	32.4653	31.6882	32.0154	32.0555	31.5763	31.0174	30.635
P02462	Collagen alpha-1(IV) chain;Arresten	COL4A1	24.3479	27.5651	26.1309	28.9916	NaN	24.4634	NaN	25.8387	NaN	NaN	NaN	24.8419	26.7782	NaN	NaN	NaN	NaN	NaN	NaN	NaN	NaN	NaN	NaN	NaN	NaN	NaN	NaN	NaN	NaN	NaN	NaN	NaN	NaN	26.9333	NaN	NaN	NaN	NaN	NaN	NaN	NaN	NaN	NaN	NaN	28.1646	28.0263	NaN
P08572	Collagen alpha-2(IV) chain;Canstatin	COL4A2	29.8045	29.8019	25.6231	30.6392	27.1849	NaN	25.2068	25.2716	NaN	NaN	NaN	26.5397	28.5419	27.7579	28.418	NaN	NaN	NaN	NaN	NaN	NaN	NaN	27.5974	26.5756	24.2711	25.6953	NaN	NaN	NaN	NaN	NaN	NaN	24.5631	29.8892	28.1283	27.0151	28.8713	24.4284	23.5687	NaN	NaN	NaN	NaN	NaN	NaN	27.1008	NaN
P20908	Collagen alpha-1(V) chain	COL5A1	28.2081	29.0812	28.3455	27.4481	29.034	28.1491	29.3954	28.2859	28.1672	28.7261	28.9958	29.4563	29.7023	30.1279	29.3764	31.3888	31.7817	31.5799	31.8159	31.7302	31.7367	31.7808	29.0546	29.0205	28.5811	28.2021	30.0609	29.1047	29.2354	29.7205	27.2707	28.8763	28.5114	29.2083	30.5949	30.0997	29.6093	31.2424	30.9166	32.1658	31.6771	31.725	32.002	31.8023	28.8361	29.2399	29.292
P05997	Collagen alpha-2(V) chain	COL5A2	28.0229	28.2178	26.0534	28.8119	26.9028	26.5001	27.3342	25.6492	25.6263	27.916	27.3709	29.2948	29.7232	30.414	29.7997	30.3229	31.1734	31.3599	31.3235	30.9989	30.976	31.5426	28.4177	27.1652	NaN	28.2861	28.0604	28.0616	28.263	28.303	27.1981	26.5592	30.2369	29.2452	29.8146	29.0217	29.5842	30.7555	31.2166	31.403	31.9326	31.0612	31.5299	31.0931	28.416	28.3225	27.8097
P25940	Collagen alpha-3(V) chain	COL5A3	25.0428	26.2006	NaN	25.1124	NaN	NaN	NaN	NaN	NaN	NaN	NaN	NaN	NaN	NaN	NaN	NaN	NaN	NaN	NaN	NaN	NaN	NaN	NaN	NaN	NaN	NaN	NaN	NaN	NaN	NaN	NaN	NaN	NaN	NaN	NaN	NaN	NaN	NaN	NaN	NaN	NaN	NaN	NaN	NaN	NaN	NaN	NaN
P12109	Collagen alpha-1(VI) chain	COL6A1	37.4769	37.6121	34.5709	36.3696	36.0623	34.283	33.0245	33.4958	32.8904	33.242	33.2803	38.4303	38.9252	37.6164	38.0946	36.8093	36.7707	35.8979	35.8209	35.9428	35.5939	36.0646	36.9258	35.5967	35.5809	35.2037	34.5428	33.5943	33.5344	33.7646	33.6448	33.4176	33.1258	37.9265	38.9068	37.8422	38.0121	37.3676	36.3053	36.1475	35.8301	36.4533	36.2506	35.6057	34.8824	35.706	35.1204
P12110	Collagen alpha-2(VI) chain	COL6A2	36.1062	36.3219	34.0198	35.472	34.8529	33.2913	31.4996	32.8579	32.2388	32.2134	31.5053	37.041	37.5194	36.9339	37.2868	36.2117	36.0939	35.1544	34.9973	35.4066	35.2132	35.4463	35.8926	34.4336	34.721	34.4839	33.3425	32.8647	32.1792	32.631	32.6782	32.2854	32.062	36.9497	37.7972	36.5424	37.1094	36.5889	36.1041	35.2587	35.0171	35.364	35.3604	35.1048	34.1092	35.2105	34.5892
P12111	Collagen alpha-3(VI) chain	COL6A3	38.4655	38.8243	36.2657	37.8832	36.6586	35.8798	34.4526	35.3593	34.497	34.6788	34.5884	38.6115	39.6529	38.8128	39.2503	38.1086	37.9202	37.1787	37.1567	37.2337	36.9717	37.4654	37.9255	36.5504	36.8295	36.4193	35.8076	35.0463	34.8771	35.2201	35.1024	34.9008	34.6312	38.8525	39.542	38.5971	39.0437	38.2136	37.758	37.4983	37.4419	37.7133	37.6171	37.168	36.1496	37.248	36.4387
A6NMZ7	Collagen alpha-6(VI) chain	COL6A6	NaN	NaN	NaN	NaN	NaN	NaN	NaN	NaN	NaN	NaN	NaN	NaN	NaN	NaN	NaN	NaN	NaN	NaN	NaN	NaN	NaN	NaN	NaN	NaN	NaN	NaN	NaN	NaN	NaN	NaN	NaN	NaN	NaN	NaN	NaN	NaN	NaN	NaN	NaN	NaN	NaN	NaN	NaN	NaN	NaN	NaN	NaN
Q02388	Collagen alpha-1(VII) chain	COL7A1	27.879	25.8783	28.0537	NaN	27.1976	29.6437	26.8551	29.3488	26.8999	27.1398	26.5622	27.2045	NaN	NaN	NaN	27.6148	27.936	27.5619	27.3022	NaN	27.9462	27.8338	NaN	NaN	28.1686	NaN	28.205	NaN	26.9634	NaN	NaN	NaN	26.7665	NaN	NaN	NaN	NaN	27.2902	NaN	24.8684	NaN	29.0463	27.3679	NaN	NaN	26.3229	30.6226
P27658	Collagen alpha-1(VIII) chain;Vastatin	COL8A1	25.2285	26.0289	NaN	24.575	26.1993	24.7385	23.9219	NaN	25.9648	24.4408	24.8493	26.8157	25.1648	27.6053	27.4222	28.0789	27.3248	28.2685	26.2437	28.0183	27.9446	29.2312	26.5521	25.8009	26.1576	NaN	26.5574	NaN	26.3497	NaN	25.7306	NaN	NaN	26.7879	25.8063	NaN	26.7288	26.1854	26.6585	26.4636	26.422	NaN	27.2501	27.9666	NaN	26.0175	26.559
P25067	Collagen alpha-2(VIII) chain	COL8A2	NaN	NaN	NaN	NaN	NaN	NaN	NaN	NaN	NaN	NaN	NaN	NaN	NaN	NaN	NaN	NaN	NaN	NaN	NaN	NaN	NaN	NaN	NaN	NaN	NaN	NaN	NaN	NaN	NaN	NaN	NaN	NaN	NaN	NaN	NaN	NaN	NaN	NaN	NaN	NaN	NaN	NaN	NaN	NaN	NaN	NaN	NaN
P20849	Collagen alpha-1(IX) chain	COL9A1	24.7352	23.6409	24.6905	NaN	26.9537	25.9402	NaN	30.1007	NaN	NaN	27.4777	28.931	29.2674	31.3284	28.2615	30.5596	30.6862	29.633	30.1296	30.325	30.2324	30.241	25.4157	26.3076	29.9271	NaN	26.4935	NaN	23.8827	NaN	26.2687	NaN	NaN	26.2772	30.4795	30.2192	28.8741	30.0263	30.8504	30.5223	30.3151	30.6537	30.0593	30.6304	27.1054	25.4766	NaN
Q14055	Collagen alpha-2(IX) chain	COL9A2	NaN	NaN	NaN	NaN	26.911	26.6498	NaN	NaN	NaN	NaN	NaN	27.0234	NaN	30.927	28.0546	27.9552	29.1156	27.2723	27.805	28.7119	27.1597	27.3087	25.7359	26.9923	29.7468	27.9564	26.1561	NaN	NaN	NaN	NaN	25.4604	NaN	27.0796	27.4611	29.347	28.3919	27.9547	29.1386	27.7586	27.1863	28.6886	26.7817	26.7432	28.223	NaN	27.2114
Q14050	Collagen alpha-3(IX) chain	COL9A3	NaN	NaN	NaN	NaN	NaN	NaN	NaN	24.3437	NaN	NaN	NaN	27.495	27.5147	NaN	NaN	28.7354	NaN	27.5992	NaN	NaN	NaN	NaN	NaN	NaN	NaN	NaN	NaN	NaN	NaN	NaN	NaN	NaN	NaN	NaN	NaN	NaN	NaN	27.4943	NaN	NaN	NaN	NaN	NaN	NaN	NaN	NaN	NaN
Q9BWP8	Collectin-11	COLEC11	NaN	NaN	NaN	NaN	NaN	NaN	NaN	22.9522	NaN	NaN	NaN	NaN	NaN	NaN	NaN	NaN	NaN	NaN	NaN	NaN	NaN	NaN	NaN	NaN	NaN	NaN	NaN	NaN	NaN	NaN	NaN	NaN	NaN	NaN	NaN	NaN	NaN	NaN	NaN	NaN	NaN	NaN	NaN	NaN	NaN	NaN	NaN
Q8NBJ5	Procollagen galactosyltransferase 1	COLGALT1	26.1984	26.0427	NaN	26.7291	NaN	NaN	NaN	NaN	NaN	NaN	NaN	25.6377	25.7888	NaN	NaN	NaN	NaN	NaN	NaN	NaN	NaN	NaN	NaN	NaN	NaN	NaN	NaN	NaN	NaN	NaN	NaN	NaN	NaN	NaN	NaN	NaN	NaN	NaN	NaN	NaN	NaN	NaN	NaN	NaN	NaN	NaN	NaN
Q9UBI1	COMM domain-containing protein 3	COMMD3	22.6904	NaN	NaN	NaN	NaN	NaN	NaN	NaN	NaN	NaN	NaN	NaN	NaN	NaN	NaN	NaN	NaN	NaN	NaN	NaN	NaN	NaN	NaN	NaN	NaN	NaN	NaN	NaN	NaN	NaN	NaN	NaN	NaN	NaN	NaN	NaN	NaN	NaN	NaN	NaN	NaN	NaN	NaN	NaN	NaN	NaN	NaN
P49747	Cartilage oligomeric matrix protein	COMP	38.2124	37.3411	38.1983	36.5543	38.5948	38.7114	38.3718	37.5374	37.3778	38.2431	38.2391	40.1248	40.1429	39.7058	39.3078	39.256	39.47	38.4796	38.0805	38.0278	38.2777	38.7547	40.1547	41	37.7868	39.7015	39.6793	38.4818	38.473	39.0662	37.0204	38.6133	38.079	39.0113	40.8228	39.184	39.0251	39.1952	39.0411	38.5532	38.4204	37.6124	38.3148	38.3745	40.5295	40.132	39.5903
P21964	Catechol O-methyltransferase	COMT	25.8202	25.5202	NaN	NaN	NaN	NaN	NaN	NaN	NaN	NaN	NaN	NaN	NaN	NaN	NaN	NaN	NaN	NaN	NaN	NaN	NaN	NaN	23.9562	23.9614	24.3325	NaN	NaN	NaN	NaN	NaN	NaN	NaN	NaN	NaN	NaN	NaN	NaN	NaN	NaN	NaN	NaN	NaN	NaN	NaN	NaN	NaN	NaN
P53621	Coatomer subunit alpha;Xenin;Proxenin	COPA	26.2298	28.2086	NaN	25.1831	NaN	NaN	NaN	NaN	NaN	NaN	NaN	26.6725	26.6141	NaN	26.1579	26.4955	NaN	26.7236	NaN	NaN	NaN	NaN	NaN	NaN	NaN	NaN	NaN	NaN	NaN	NaN	NaN	NaN	NaN	NaN	NaN	NaN	NaN	NaN	NaN	NaN	29.858	NaN	NaN	NaN	NaN	27.6388	26.8651
P53618	Coatomer subunit beta	COPB1	24.8265	25.3632	25.5628	23.8876	26.1916	NaN	NaN	NaN	NaN	25.3236	NaN	24.2528	NaN	NaN	24.3377	NaN	NaN	NaN	NaN	NaN	NaN	NaN	NaN	NaN	NaN	NaN	NaN	NaN	24.95	NaN	NaN	24.7845	NaN	NaN	NaN	NaN	NaN	NaN	NaN	NaN	NaN	NaN	NaN	NaN	NaN	NaN	24.6254
P35606	Coatomer subunit beta	COPB2	26.0125	27.0581	NaN	25.0184	NaN	23.3961	NaN	NaN	NaN	NaN	NaN	NaN	24.5546	NaN	NaN	23.9307	NaN	NaN	NaN	NaN	NaN	NaN	25.4932	NaN	24.8013	NaN	NaN	NaN	NaN	NaN	NaN	26.2757	NaN	NaN	NaN	NaN	NaN	NaN	NaN	NaN	NaN	NaN	NaN	NaN	NaN	NaN	NaN
O14579	Coatomer subunit epsilon	COPE	24.7303	26.2264	NaN	24.7595	NaN	NaN	NaN	NaN	NaN	NaN	NaN	24.4028	25.0242	NaN	NaN	NaN	NaN	NaN	NaN	NaN	NaN	NaN	NaN	NaN	NaN	NaN	NaN	NaN	NaN	NaN	NaN	NaN	NaN	25.2189	NaN	NaN	NaN	NaN	NaN	NaN	NaN	NaN	NaN	NaN	NaN	NaN	NaN
Q9Y678	Coatomer subunit gamma-1	COPG1	25.6996	26.0834	NaN	25.4555	NaN	NaN	NaN	NaN	NaN	NaN	NaN	NaN	NaN	NaN	NaN	NaN	NaN	NaN	NaN	NaN	NaN	NaN	NaN	NaN	25.4831	NaN	NaN	NaN	NaN	NaN	NaN	NaN	NaN	NaN	NaN	NaN	NaN	NaN	NaN	NaN	NaN	NaN	NaN	NaN	26.4767	NaN	NaN
P61201	COP9 signalosome complex subunit 2	COPS2	NaN	NaN	NaN	23.6112	NaN	NaN	NaN	NaN	NaN	NaN	NaN	NaN	NaN	NaN	NaN	NaN	NaN	NaN	NaN	NaN	NaN	NaN	NaN	NaN	NaN	NaN	NaN	NaN	NaN	NaN	NaN	NaN	NaN	NaN	NaN	NaN	NaN	NaN	NaN	NaN	NaN	NaN	NaN	NaN	NaN	NaN	NaN
Q9UNS2	COP9 signalosome complex subunit 3	COPS3	NaN	NaN	NaN	NaN	NaN	NaN	NaN	NaN	NaN	NaN	NaN	NaN	NaN	NaN	NaN	NaN	NaN	NaN	NaN	NaN	NaN	NaN	NaN	NaN	NaN	NaN	NaN	NaN	NaN	NaN	NaN	NaN	NaN	NaN	NaN	NaN	NaN	NaN	NaN	NaN	NaN	NaN	NaN	NaN	NaN	NaN	NaN
Q9BT78	COP9 signalosome complex subunit 4	COPS4	24.68	25.1865	NaN	24.6281	NaN	NaN	NaN	NaN	NaN	NaN	NaN	NaN	NaN	NaN	NaN	NaN	NaN	NaN	NaN	NaN	NaN	NaN	NaN	NaN	NaN	NaN	NaN	NaN	NaN	NaN	NaN	NaN	NaN	NaN	NaN	NaN	NaN	NaN	NaN	NaN	NaN	NaN	NaN	NaN	NaN	NaN	NaN
Q92905	COP9 signalosome complex subunit 5	COPS5	NaN	NaN	NaN	23.2239	NaN	NaN	NaN	NaN	NaN	NaN	NaN	NaN	NaN	NaN	NaN	NaN	NaN	NaN	NaN	NaN	NaN	NaN	NaN	NaN	NaN	NaN	NaN	NaN	NaN	NaN	NaN	NaN	NaN	NaN	NaN	NaN	NaN	NaN	NaN	NaN	NaN	NaN	NaN	NaN	NaN	NaN	NaN
Q7L5N1	COP9 signalosome complex subunit 6	COPS6	NaN	NaN	NaN	26.5676	NaN	NaN	NaN	NaN	NaN	NaN	NaN	NaN	NaN	NaN	NaN	NaN	NaN	NaN	NaN	NaN	NaN	NaN	NaN	NaN	NaN	NaN	NaN	NaN	NaN	NaN	NaN	NaN	NaN	NaN	NaN	NaN	NaN	NaN	NaN	NaN	NaN	NaN	NaN	NaN	NaN	NaN	NaN
Q9UBW8	COP9 signalosome complex subunit 7a	COPS7A	NaN	23.0815	NaN	NaN	NaN	NaN	NaN	NaN	NaN	NaN	NaN	NaN	NaN	NaN	NaN	NaN	NaN	NaN	NaN	NaN	NaN	NaN	NaN	NaN	NaN	NaN	NaN	NaN	NaN	NaN	NaN	NaN	NaN	NaN	NaN	NaN	NaN	NaN	NaN	NaN	NaN	NaN	NaN	NaN	NaN	NaN	NaN
Q99627	COP9 signalosome complex subunit 8	COPS8	23.5533	23.5638	NaN	24.3434	NaN	NaN	NaN	NaN	NaN	NaN	NaN	NaN	NaN	NaN	NaN	NaN	NaN	NaN	NaN	NaN	NaN	NaN	NaN	NaN	NaN	NaN	NaN	NaN	NaN	NaN	NaN	NaN	NaN	NaN	NaN	NaN	NaN	NaN	NaN	NaN	NaN	NaN	NaN	NaN	NaN	NaN	NaN
P61923	Coatomer subunit zeta-1	COPZ1	23.76	24.2198	NaN	NaN	NaN	NaN	NaN	NaN	NaN	NaN	NaN	23.494	23.3623	NaN	NaN	NaN	NaN	NaN	NaN	NaN	NaN	NaN	23.9861	NaN	NaN	NaN	NaN	NaN	NaN	NaN	NaN	NaN	NaN	NaN	NaN	NaN	NaN	NaN	NaN	NaN	NaN	NaN	NaN	NaN	NaN	NaN	NaN
Q9P299	Coatomer subunit zeta-2	COPZ2	NaN	NaN	NaN	NaN	NaN	NaN	NaN	NaN	NaN	NaN	NaN	NaN	21.9809	NaN	NaN	NaN	NaN	NaN	NaN	NaN	NaN	NaN	NaN	NaN	NaN	NaN	NaN	NaN	NaN	NaN	NaN	NaN	NaN	NaN	NaN	NaN	NaN	NaN	NaN	NaN	NaN	NaN	NaN	NaN	NaN	NaN	NaN
Q5HYK3	2-methoxy-6-polyprenyl-1,4-benzoquinol methylase, mitochondrial	COQ5	NaN	NaN	NaN	NaN	NaN	NaN	NaN	NaN	NaN	NaN	NaN	NaN	NaN	NaN	NaN	NaN	NaN	NaN	NaN	NaN	NaN	NaN	NaN	NaN	NaN	NaN	NaN	NaN	NaN	NaN	NaN	NaN	NaN	NaN	NaN	NaN	NaN	NaN	NaN	NaN	NaN	NaN	NaN	NaN	NaN	NaN	NaN
O75208	Ubiquinone biosynthesis protein COQ9, mitochondrial	COQ9	NaN	NaN	NaN	NaN	NaN	NaN	NaN	NaN	NaN	NaN	NaN	NaN	NaN	NaN	NaN	NaN	NaN	NaN	NaN	NaN	NaN	NaN	NaN	NaN	NaN	NaN	NaN	NaN	NaN	NaN	NaN	NaN	NaN	24.7359	NaN	NaN	NaN	NaN	NaN	NaN	NaN	NaN	NaN	NaN	NaN	NaN	NaN
P31146	Coronin-1A	CORO1A	27.2435	26.622	25.8654	27.9503	25.6506	25.5411	25.6916	NaN	25.6374	NaN	NaN	NaN	NaN	NaN	NaN	NaN	NaN	NaN	NaN	NaN	NaN	NaN	26.2387	NaN	NaN	NaN	NaN	NaN	NaN	NaN	24.5832	27.3129	NaN	NaN	NaN	NaN	NaN	NaN	NaN	NaN	NaN	NaN	NaN	NaN	26.6842	NaN	NaN
Q9BR76	Coronin-1B	CORO1B	25.0067	26.6661	NaN	25.0872	NaN	NaN	NaN	NaN	NaN	NaN	NaN	NaN	23.6421	NaN	NaN	NaN	23.1933	NaN	NaN	NaN	NaN	NaN	23.5553	23.184	NaN	NaN	NaN	NaN	NaN	NaN	NaN	NaN	NaN	NaN	NaN	NaN	NaN	NaN	NaN	NaN	NaN	NaN	NaN	NaN	NaN	NaN	NaN
Q9ULV4	Coronin-1C	CORO1C	26.454	26.8778	25.9012	25.5856	25.8401	NaN	NaN	NaN	NaN	NaN	NaN	NaN	25.5417	NaN	NaN	NaN	NaN	NaN	NaN	NaN	NaN	NaN	25.4978	NaN	26.3111	NaN	NaN	NaN	NaN	NaN	NaN	NaN	NaN	NaN	NaN	NaN	NaN	NaN	NaN	NaN	NaN	NaN	NaN	NaN	NaN	NaN	24.0093
Q6QEF8	Coronin-6	CORO6	23.1558	NaN	NaN	NaN	NaN	NaN	NaN	NaN	NaN	NaN	NaN	NaN	NaN	NaN	NaN	NaN	NaN	NaN	NaN	NaN	NaN	NaN	NaN	NaN	NaN	NaN	NaN	NaN	NaN	NaN	NaN	NaN	NaN	NaN	NaN	NaN	NaN	NaN	NaN	NaN	NaN	NaN	NaN	NaN	NaN	NaN	NaN
Q14019	Coactosin-like protein	COTL1	27.276	28.4348	26.1455	28.0402	24.3288	NaN	NaN	24.9121	25.4023	NaN	NaN	NaN	NaN	26.053	25.1202	NaN	NaN	NaN	NaN	NaN	NaN	NaN	26.7574	NaN	26.3204	NaN	NaN	NaN	NaN	NaN	NaN	NaN	NaN	25.8303	NaN	NaN	NaN	NaN	NaN	NaN	NaN	NaN	NaN	NaN	26.2085	26.2296	NaN
Q14061	Cytochrome c oxidase copper chaperone	COX17	NaN	NaN	NaN	NaN	NaN	NaN	NaN	NaN	NaN	NaN	NaN	NaN	NaN	NaN	NaN	NaN	NaN	NaN	NaN	NaN	NaN	NaN	NaN	NaN	NaN	NaN	NaN	NaN	NaN	NaN	NaN	NaN	NaN	NaN	NaN	NaN	NaN	NaN	NaN	NaN	NaN	NaN	NaN	NaN	NaN	NaN	NaN
P13073	Cytochrome c oxidase subunit 4 isoform 1, mitochondrial	COX4I1	26.8875	25.79	NaN	28.3295	NaN	NaN	NaN	NaN	NaN	NaN	NaN	24.6524	NaN	NaN	NaN	NaN	NaN	NaN	NaN	NaN	NaN	NaN	NaN	NaN	NaN	NaN	NaN	NaN	NaN	NaN	NaN	NaN	NaN	NaN	NaN	NaN	NaN	NaN	NaN	NaN	NaN	NaN	NaN	NaN	NaN	NaN	NaN
P20674	Cytochrome c oxidase subunit 5A, mitochondrial	COX5A	25.4475	24.608	NaN	27.0766	NaN	NaN	NaN	NaN	NaN	NaN	NaN	NaN	NaN	NaN	NaN	NaN	NaN	NaN	NaN	NaN	NaN	NaN	NaN	NaN	NaN	NaN	NaN	NaN	NaN	NaN	NaN	NaN	NaN	NaN	NaN	NaN	NaN	NaN	NaN	NaN	NaN	NaN	NaN	NaN	NaN	NaN	NaN
P10606	Cytochrome c oxidase subunit 5B, mitochondrial	COX5B	27.2951	25.29	NaN	26.3788	NaN	24.9806	NaN	NaN	NaN	NaN	NaN	NaN	NaN	NaN	NaN	NaN	NaN	NaN	NaN	NaN	NaN	NaN	NaN	NaN	NaN	NaN	NaN	NaN	NaN	NaN	NaN	NaN	NaN	26.1354	NaN	NaN	NaN	NaN	NaN	NaN	NaN	NaN	NaN	NaN	NaN	NaN	NaN
P14854	Cytochrome c oxidase subunit 6B1	COX6B1	26.7369	26.3093	NaN	28.2934	NaN	NaN	NaN	NaN	NaN	NaN	NaN	NaN	24.6267	NaN	NaN	NaN	NaN	NaN	NaN	NaN	NaN	NaN	25.4891	NaN	NaN	NaN	NaN	NaN	NaN	NaN	NaN	NaN	NaN	25.9809	NaN	NaN	NaN	NaN	NaN	NaN	NaN	NaN	NaN	NaN	NaN	NaN	NaN
P24310	Cytochrome c oxidase subunit 7A1, mitochondrial	COX7A1	NaN	NaN	NaN	NaN	NaN	NaN	NaN	NaN	NaN	NaN	NaN	NaN	NaN	NaN	NaN	NaN	NaN	NaN	NaN	NaN	NaN	NaN	NaN	NaN	NaN	NaN	NaN	NaN	NaN	NaN	NaN	NaN	NaN	NaN	NaN	NaN	NaN	NaN	NaN	NaN	NaN	NaN	NaN	NaN	NaN	NaN	NaN
P14406	Cytochrome c oxidase subunit 7A2, mitochondrial	COX7A2	25.3964	NaN	NaN	NaN	NaN	NaN	NaN	NaN	NaN	NaN	NaN	NaN	NaN	NaN	NaN	NaN	NaN	NaN	NaN	NaN	NaN	NaN	NaN	NaN	NaN	NaN	NaN	NaN	NaN	NaN	NaN	NaN	NaN	NaN	NaN	NaN	NaN	NaN	NaN	NaN	NaN	NaN	NaN	NaN	NaN	NaN	NaN
P00450	Ceruloplasmin	CP	32.909	33.0962	33.1266	32.8018	34.6988	33.5881	35.0819	34.0247	34.485	34.4486	35.0831	33.1964	31.494	32.4024	30.1914	33.0191	33.2213	33.5826	33.9691	33.8	33.8436	33.6877	31.5798	32.3454	32.5114	31.9378	33.5156	33.6773	34.6134	34.0143	33.701	33.736	34.4924	30.1483	32.3179	31.8634	30.8746	33.0105	33.4666	34.0016	33.9368	33.7673	33.7117	33.313	30.0562	31.7723	31.1799
P15085	Carboxypeptidase A1	CPA1	NaN	NaN	24.207	NaN	NaN	NaN	NaN	NaN	NaN	NaN	NaN	NaN	NaN	NaN	NaN	NaN	NaN	NaN	NaN	NaN	NaN	NaN	NaN	NaN	NaN	NaN	NaN	NaN	NaN	NaN	NaN	NaN	NaN	NaN	NaN	NaN	NaN	NaN	NaN	NaN	NaN	NaN	NaN	NaN	NaN	NaN	NaN
P15088	Mast cell carboxypeptidase A	CPA3	27.4261	25.6762	NaN	27.312	NaN	25.0842	26.2204	NaN	NaN	NaN	NaN	NaN	NaN	NaN	NaN	NaN	NaN	NaN	NaN	NaN	NaN	NaN	NaN	NaN	NaN	NaN	NaN	NaN	NaN	NaN	NaN	NaN	NaN	26.3456	NaN	NaN	NaN	NaN	NaN	NaN	NaN	NaN	NaN	NaN	NaN	26.6834	NaN
Q8IZJ3	C3 and PZP-like alpha-2-macroglobulin domain-containing protein 8	CPAMD8	24.5443	24.5779	NaN	NaN	26.8934	25.8521	NaN	25.3785	NaN	NaN	NaN	25.8035	25.5782	NaN	25.7062	25.8759	26.2123	25.458	NaN	NaN	NaN	NaN	26.5355	27.6262	NaN	27.1598	27.7979	26.0644	25.8637	26.2117	NaN	24.9127	NaN	25.4306	25.1057	NaN	26.1706	NaN	28.4078	25.0305	25.5159	NaN	26.7717	NaN	26.535	28.9323	NaN
Q96IY4	Carboxypeptidase B2	CPB2	26.1213	28.189	31.2422	24.3025	30.4844	30.0735	29.6165	29.712	29.9143	28.0761	30.2866	28.9641	NaN	22.593	NaN	25.2803	NaN	23.8713	NaN	NaN	NaN	NaN	25.9448	28.7499	29.8442	28.1333	28.1422	NaN	30.9357	28.8061	32.1037	28.3964	30.9715	NaN	NaN	NaN	NaN	NaN	NaN	NaN	NaN	NaN	NaN	24.1095	NaN	NaN	29.2009
P16870	Carboxypeptidase E	CPE	NaN	NaN	NaN	NaN	NaN	NaN	22.7346	NaN	NaN	NaN	NaN	NaN	NaN	NaN	NaN	NaN	NaN	NaN	NaN	NaN	NaN	NaN	NaN	NaN	NaN	NaN	NaN	NaN	23.4175	NaN	NaN	NaN	NaN	NaN	NaN	NaN	NaN	NaN	NaN	NaN	NaN	NaN	NaN	NaN	NaN	NaN	NaN
P15169	Carboxypeptidase N catalytic chain	CPN1	25.0767	25.2934	24.7246	NaN	27.2954	27.2609	28.2021	27.2392	26.5212	26.7582	26.605	26.6698	NaN	NaN	NaN	NaN	NaN	25.5885	NaN	NaN	NaN	NaN	24.5541	25.2216	26.1048	NaN	NaN	NaN	26.9726	NaN	26.757	NaN	27.2683	NaN	NaN	NaN	NaN	NaN	NaN	NaN	NaN	NaN	NaN	NaN	NaN	NaN	NaN
P22792	Carboxypeptidase N subunit 2	CPN2	25.221	25.9045	27.4305	24.9911	28.1849	27.9193	27.0563	27.2636	26.985	27.0796	28.1107	28.2328	NaN	NaN	NaN	27.6129	26.8477	NaN	NaN	NaN	NaN	NaN	NaN	NaN	NaN	NaN	NaN	26.5465	27.8048	27.4453	28.1981	26.5951	28.0458	NaN	NaN	NaN	NaN	NaN	NaN	NaN	NaN	NaN	NaN	NaN	NaN	NaN	26.4768
Q99829	Copine-1	CPNE1	NaN	NaN	NaN	NaN	NaN	NaN	NaN	NaN	NaN	NaN	NaN	NaN	24.8439	25.3981	NaN	NaN	NaN	NaN	NaN	NaN	NaN	NaN	NaN	NaN	NaN	NaN	NaN	NaN	NaN	NaN	NaN	NaN	NaN	24.729	NaN	NaN	NaN	NaN	NaN	NaN	NaN	NaN	NaN	NaN	NaN	NaN	NaN
O75131	Copine-3	CPNE3	25.5881	25.4657	23.838	24.9332	24.8709	NaN	23.78	NaN	24.5918	NaN	NaN	26.2992	26.0503	27.8823	26.8219	25.5739	26.5611	25.9875	NaN	NaN	NaN	25.8193	25.7024	26.2203	NaN	26.3383	NaN	NaN	24.6063	NaN	NaN	NaN	NaN	26.0818	26.2955	NaN	26.3258	26.3718	NaN	NaN	NaN	NaN	NaN	NaN	26.1746	26.1511	24.9131
P36551	Oxygen-dependent coproporphyrinogen-III oxidase, mitochondrial	CPOX	NaN	25.1001	NaN	24.2126	NaN	NaN	NaN	NaN	NaN	NaN	NaN	NaN	NaN	NaN	NaN	NaN	NaN	NaN	NaN	NaN	NaN	NaN	NaN	NaN	NaN	NaN	NaN	NaN	NaN	NaN	NaN	NaN	NaN	NaN	NaN	NaN	NaN	NaN	NaN	NaN	NaN	NaN	NaN	NaN	NaN	NaN	NaN
Q9BRF8	Serine/threonine-protein phosphatase CPPED1	CPPED1	25.8185	26.4369	28.5561	26.7627	27.2036	NaN	NaN	NaN	NaN	NaN	NaN	NaN	28.7408	NaN	NaN	NaN	NaN	NaN	NaN	NaN	NaN	NaN	28.3173	NaN	28.8504	NaN	NaN	NaN	NaN	NaN	NaN	NaN	NaN	NaN	NaN	NaN	NaN	NaN	NaN	NaN	NaN	NaN	NaN	NaN	NaN	NaN	NaN
Q9Y646	Carboxypeptidase Q	CPQ	24.6267	25.3103	25.293	24.45	25.6782	25.931	26.2019	NaN	NaN	25.8992	25.993	25.8862	25.5927	NaN	25.8609	26.899	26.0876	27.5192	NaN	NaN	26.684	25.9089	24.8378	26.7534	NaN	25.5157	26.4615	NaN	25.8091	25.6012	NaN	26.2212	26.072	NaN	26.259	NaN	NaN	27.6269	27.5535	27.1422	25.6924	NaN	27.4136	27.0568	26.4247	26.6573	26.1674
Q16630	Cleavage and polyadenylation specificity factor subunit 6	CPSF6	NaN	NaN	NaN	NaN	NaN	NaN	NaN	NaN	NaN	NaN	NaN	NaN	NaN	NaN	NaN	NaN	NaN	NaN	NaN	NaN	NaN	NaN	NaN	NaN	NaN	NaN	NaN	NaN	NaN	NaN	NaN	NaN	NaN	NaN	NaN	NaN	NaN	NaN	NaN	NaN	NaN	NaN	NaN	NaN	NaN	NaN	NaN
Q9H3G5	Probable serine carboxypeptidase CPVL	CPVL	24.6946	25.1243	NaN	NaN	NaN	NaN	NaN	NaN	NaN	NaN	NaN	NaN	NaN	NaN	NaN	NaN	NaN	NaN	NaN	NaN	NaN	NaN	NaN	NaN	NaN	NaN	NaN	NaN	NaN	NaN	NaN	NaN	NaN	NaN	NaN	NaN	NaN	NaN	NaN	NaN	NaN	NaN	NaN	NaN	NaN	NaN	NaN
Q96SM3	Probable carboxypeptidase X1	CPXM1	NaN	24.2244	NaN	NaN	NaN	NaN	NaN	NaN	NaN	NaN	NaN	NaN	NaN	NaN	NaN	NaN	NaN	NaN	NaN	NaN	NaN	NaN	NaN	NaN	NaN	NaN	NaN	NaN	NaN	NaN	NaN	NaN	NaN	NaN	NaN	NaN	NaN	NaN	NaN	NaN	NaN	NaN	NaN	NaN	NaN	NaN	NaN
Q8N436	Inactive carboxypeptidase-like protein X2	CPXM2	26.9255	29.0858	NaN	25.6793	26.0604	NaN	NaN	NaN	NaN	NaN	NaN	25.1767	27.6794	25.5728	26.5438	27.4661	26.2165	28.0614	26.2028	26.3853	27.4437	25.7843	26.0339	NaN	NaN	NaN	25.9064	NaN	NaN	NaN	25.7594	NaN	NaN	25.99	26.4116	27.3183	NaN	25.9808	26.4027	26.8832	24.9655	28.141	NaN	27.489	NaN	25.2509	NaN
Q66K79	Carboxypeptidase Z	CPZ	NaN	NaN	NaN	NaN	NaN	NaN	NaN	NaN	NaN	NaN	NaN	NaN	NaN	NaN	NaN	NaN	NaN	NaN	NaN	NaN	NaN	24.0454	NaN	NaN	NaN	NaN	NaN	NaN	NaN	NaN	NaN	NaN	NaN	NaN	NaN	NaN	NaN	NaN	NaN	NaN	NaN	NaN	NaN	NaN	NaN	NaN	NaN
P29762	Cellular retinoic acid-binding protein 1	CRABP1	NaN	NaN	NaN	24.0772	NaN	NaN	NaN	NaN	NaN	NaN	NaN	NaN	NaN	NaN	NaN	NaN	NaN	NaN	NaN	NaN	NaN	NaN	NaN	NaN	NaN	NaN	NaN	NaN	NaN	NaN	NaN	NaN	NaN	NaN	NaN	NaN	NaN	NaN	NaN	NaN	NaN	NaN	NaN	NaN	NaN	NaN	NaN
P29373	Cellular retinoic acid-binding protein 2	CRABP2	24.9234	25.748	23.7055	24.992	NaN	NaN	NaN	NaN	NaN	NaN	NaN	NaN	25.0849	NaN	NaN	NaN	NaN	NaN	NaN	NaN	NaN	NaN	25.4891	NaN	NaN	NaN	NaN	NaN	NaN	NaN	NaN	NaN	NaN	25.1669	24.6245	NaN	NaN	NaN	NaN	NaN	NaN	NaN	NaN	NaN	NaN	NaN	NaN
P43155	Carnitine O-acetyltransferase	CRAT	25.0955	NaN	NaN	25.421	NaN	NaN	NaN	NaN	NaN	NaN	NaN	NaN	NaN	NaN	NaN	NaN	NaN	NaN	NaN	NaN	NaN	NaN	NaN	NaN	NaN	NaN	NaN	NaN	NaN	NaN	NaN	NaN	NaN	NaN	NaN	NaN	NaN	NaN	NaN	NaN	NaN	NaN	NaN	NaN	NaN	NaN	NaN
O75629	Protein CREG1	CREG1	28.0675	27.06	NaN	NaN	NaN	NaN	NaN	NaN	NaN	NaN	NaN	NaN	26.4568	NaN	NaN	NaN	NaN	NaN	NaN	NaN	NaN	NaN	NaN	NaN	NaN	NaN	NaN	NaN	NaN	NaN	NaN	NaN	NaN	NaN	NaN	NaN	NaN	NaN	NaN	NaN	NaN	NaN	NaN	NaN	NaN	NaN	NaN
Q6UXH1	Cysteine-rich with EGF-like domain protein 2	CRELD2	NaN	NaN	NaN	NaN	NaN	NaN	NaN	NaN	NaN	NaN	NaN	NaN	NaN	NaN	NaN	NaN	NaN	NaN	NaN	NaN	NaN	NaN	NaN	NaN	NaN	NaN	NaN	NaN	NaN	NaN	NaN	NaN	NaN	NaN	NaN	NaN	NaN	NaN	NaN	NaN	NaN	NaN	NaN	NaN	NaN	NaN	NaN
P52943	Cysteine-rich protein 2	CRIP2	25.5405	26.2936	NaN	NaN	NaN	NaN	NaN	NaN	NaN	NaN	NaN	NaN	26.9503	26.8317	26.8528	NaN	NaN	NaN	NaN	NaN	NaN	NaN	25.9809	NaN	NaN	NaN	NaN	NaN	NaN	NaN	NaN	NaN	NaN	28.6187	NaN	NaN	27.2993	NaN	NaN	25.8174	NaN	NaN	23.7924	NaN	NaN	NaN	NaN
P54108	Cysteine-rich secretory protein 3	CRISP3	NaN	NaN	NaN	NaN	NaN	NaN	NaN	NaN	NaN	NaN	NaN	NaN	NaN	NaN	NaN	NaN	NaN	NaN	NaN	NaN	NaN	NaN	NaN	NaN	NaN	NaN	NaN	NaN	NaN	NaN	NaN	NaN	NaN	NaN	NaN	NaN	NaN	NaN	NaN	NaN	NaN	NaN	NaN	NaN	NaN	NaN	NaN
Q9H336	Cysteine-rich secretory protein LCCL domain-containing 1	CRISPLD1	25.2595	24.2232	24.2733	NaN	NaN	25.8571	26.4047	NaN	26.4519	24.8115	26.5111	NaN	NaN	NaN	24.6814	NaN	NaN	NaN	28.3553	26.5792	25.9055	25.9515	NaN	NaN	NaN	24.6877	NaN	NaN	25.3268	NaN	NaN	24.9434	NaN	NaN	NaN	NaN	NaN	NaN	NaN	27.7748	28.4807	NaN	NaN	27.5268	NaN	NaN	NaN
Q9H0B8	Cysteine-rich secretory protein LCCL domain-containing 2	CRISPLD2	24.2853	25.2634	NaN	24.6531	NaN	NaN	NaN	NaN	NaN	NaN	NaN	24.678	24.3117	NaN	NaN	NaN	NaN	NaN	NaN	NaN	NaN	NaN	NaN	NaN	NaN	NaN	NaN	NaN	NaN	NaN	NaN	NaN	NaN	NaN	NaN	NaN	NaN	NaN	NaN	NaN	NaN	NaN	NaN	NaN	NaN	NaN	NaN
P46108	Adapter molecule crk	CRK	25.8059	25.797	NaN	25.3116	NaN	NaN	NaN	NaN	NaN	NaN	NaN	NaN	NaN	NaN	NaN	NaN	NaN	NaN	NaN	NaN	NaN	NaN	24.8406	NaN	NaN	NaN	NaN	NaN	NaN	NaN	NaN	NaN	NaN	NaN	NaN	NaN	NaN	NaN	NaN	NaN	NaN	NaN	NaN	NaN	NaN	NaN	NaN
P46109	Crk-like protein	CRKL	25.168	23.8786	NaN	25.2513	NaN	NaN	NaN	NaN	NaN	NaN	NaN	NaN	NaN	NaN	NaN	NaN	NaN	NaN	NaN	NaN	NaN	NaN	23.8387	NaN	NaN	NaN	NaN	NaN	NaN	NaN	NaN	NaN	NaN	NaN	NaN	NaN	NaN	NaN	NaN	NaN	NaN	NaN	NaN	NaN	NaN	NaN	NaN
O75462	Cytokine receptor-like factor 1	CRLF1	24.0655	25.6944	30.1132	NaN	27.2437	29.4755	27.7405	28.1826	28.0051	26.041	29.1374	26.0207	22.6325	NaN	23.7373	23.0546	NaN	NaN	NaN	NaN	25.9373	26.095	25.945	26.9652	28.8396	28.5894	27.7554	27.9434	28.6169	28.0522	29.3208	27.7468	30.19	NaN	NaN	NaN	NaN	NaN	NaN	NaN	NaN	NaN	NaN	NaN	27.6225	NaN	30.1676
Q5TZA2	Rootletin	CROCC	NaN	NaN	NaN	NaN	NaN	NaN	NaN	NaN	NaN	NaN	NaN	NaN	NaN	NaN	NaN	NaN	NaN	NaN	NaN	NaN	NaN	NaN	NaN	NaN	NaN	NaN	NaN	NaN	NaN	NaN	NaN	NaN	NaN	NaN	NaN	NaN	24.9613	NaN	NaN	NaN	NaN	NaN	NaN	NaN	NaN	NaN	NaN
P02741	C-reactive protein;C-reactive protein(1-205)	CRP	27.8486	30.2448	30.2843	27.4048	31.6625	30.8106	31.099	30.6033	29.8378	30.1563	30.8647	29.946	NaN	27.7597	NaN	NaN	NaN	NaN	NaN	NaN	NaN	NaN	28.5109	28.2969	30.6722	28.649	29.2425	NaN	28.93	28.2958	30.9364	NaN	29.1028	NaN	NaN	NaN	NaN	NaN	NaN	NaN	NaN	NaN	NaN	NaN	NaN	28.4188	NaN
Q9NQ79	Cartilage acidic protein 1	CRTAC1	29.4859	29.7255	31.0077	29.4647	30.5012	30.7635	31.4803	31.6282	32.1584	31.2908	32.0478	30.089	30.1547	30.1151	28.9946	31.468	31.4194	31.826	31.4451	31.5006	31.4936	30.9412	29.7624	30.1002	30.0971	30.2583	30.6098	29.6186	30.9646	30.5742	31.34	30.7275	31.7316	29.0845	30.8711	27.3399	29.3616	31.0935	30.7266	30.5542	30.4976	30.3283	30.3963	30.3418	30.681	29.8452	31.4271
O75718	Cartilage-associated protein	CRTAP	NaN	23.9042	NaN	NaN	NaN	NaN	NaN	NaN	NaN	NaN	NaN	NaN	NaN	NaN	NaN	NaN	NaN	NaN	NaN	NaN	NaN	NaN	NaN	NaN	NaN	NaN	NaN	NaN	NaN	NaN	NaN	NaN	NaN	NaN	NaN	NaN	NaN	NaN	NaN	NaN	NaN	NaN	NaN	NaN	NaN	NaN	NaN
P02511	Alpha-crystallin B chain	CRYAB	31.0921	28.1118	27.9014	31.3467	27.5742	26.5179	26.3886	26.3088	25.1695	26.9808	25.925	28.899	29.5258	29.543	29.4552	29.1868	28.1055	30.3478	27.9483	29.3058	27.444	29.9166	28.9673	28.5836	28.4326	28.7924	27.1253	28.9526	26.3417	27.4221	26.8291	26.8638	26.1148	30.5987	29.1224	27.842	29.0105	29.4866	NaN	29.5391	28.1668	28.7394	28.5732	29.5068	28.8548	29.2469	29.0287
Q68DQ2	Very large A-kinase anchor protein	CRYBG3	NaN	NaN	NaN	NaN	NaN	NaN	NaN	NaN	NaN	NaN	NaN	NaN	NaN	NaN	NaN	NaN	NaN	NaN	NaN	NaN	NaN	NaN	NaN	NaN	NaN	NaN	NaN	NaN	NaN	NaN	NaN	NaN	NaN	NaN	NaN	NaN	NaN	NaN	NaN	NaN	NaN	NaN	NaN	NaN	NaN	NaN	NaN
Q9Y2S2	Lambda-crystallin homolog	CRYL1	23.0653	24.2893	23.8221	24.1761	NaN	NaN	NaN	25.5258	24.5476	NaN	NaN	23.7023	NaN	NaN	NaN	NaN	NaN	24.7923	NaN	NaN	NaN	NaN	NaN	NaN	NaN	NaN	NaN	NaN	NaN	NaN	NaN	NaN	NaN	NaN	NaN	NaN	24.5771	NaN	25.226	NaN	NaN	NaN	NaN	NaN	NaN	24.1873	NaN
Q14894	Ketimine reductase mu-crystallin	CRYM	24.6388	NaN	NaN	25.491	NaN	NaN	NaN	NaN	NaN	NaN	NaN	NaN	NaN	NaN	NaN	NaN	NaN	NaN	NaN	NaN	NaN	NaN	NaN	NaN	NaN	NaN	NaN	NaN	NaN	NaN	NaN	NaN	NaN	NaN	NaN	NaN	NaN	NaN	NaN	NaN	NaN	NaN	NaN	NaN	NaN	NaN	NaN
Q08257	Quinone oxidoreductase	CRYZ	26.4572	26.8622	NaN	27.0801	NaN	NaN	25.7802	25.6365	25.4884	NaN	NaN	NaN	26.3976	NaN	NaN	25.3564	NaN	NaN	NaN	NaN	NaN	27.0422	26.3867	26.9218	27.2584	NaN	NaN	NaN	27.4724	27.2243	NaN	NaN	NaN	NaN	NaN	NaN	NaN	NaN	NaN	NaN	NaN	NaN	NaN	NaN	25.4187	25.9469	26.2043
O95825	Quinone oxidoreductase-like protein 1	CRYZL1	NaN	NaN	NaN	NaN	NaN	NaN	NaN	NaN	NaN	NaN	NaN	NaN	NaN	NaN	NaN	NaN	NaN	NaN	NaN	NaN	NaN	NaN	NaN	NaN	NaN	NaN	NaN	NaN	NaN	NaN	NaN	NaN	NaN	NaN	NaN	NaN	NaN	NaN	NaN	NaN	NaN	NaN	NaN	NaN	NaN	NaN	NaN
O75390	Citrate synthase, mitochondrial	CS	26.383	26.0264	NaN	26.1107	NaN	NaN	NaN	NaN	NaN	NaN	NaN	NaN	24.5057	NaN	NaN	NaN	24.4327	NaN	NaN	NaN	NaN	NaN	NaN	NaN	NaN	NaN	NaN	NaN	NaN	NaN	NaN	NaN	NaN	25.4982	NaN	NaN	NaN	NaN	NaN	NaN	NaN	NaN	NaN	NaN	NaN	NaN	NaN
O75534	Cold shock domain-containing protein E1	CSDE1	23.4422	23.8319	NaN	NaN	NaN	NaN	NaN	NaN	NaN	NaN	NaN	NaN	NaN	NaN	NaN	NaN	NaN	NaN	NaN	NaN	NaN	NaN	NaN	NaN	NaN	NaN	NaN	NaN	NaN	NaN	NaN	NaN	NaN	NaN	NaN	NaN	NaN	NaN	NaN	NaN	NaN	NaN	NaN	NaN	NaN	NaN	NaN
P55060	Exportin-2	CSE1L	24.3483	24.8581	NaN	24.1941	NaN	NaN	NaN	NaN	NaN	NaN	NaN	NaN	NaN	NaN	NaN	NaN	NaN	NaN	NaN	NaN	NaN	NaN	24.4835	NaN	NaN	NaN	NaN	NaN	NaN	NaN	NaN	NaN	NaN	NaN	NaN	NaN	NaN	NaN	NaN	NaN	NaN	NaN	NaN	NaN	NaN	NaN	NaN
P07333	Macrophage colony-stimulating factor 1 receptor	CSF1R	NaN	24.196	NaN	24.7373	NaN	24.7771	NaN	NaN	NaN	NaN	NaN	24.2987	NaN	NaN	NaN	NaN	NaN	NaN	NaN	NaN	NaN	NaN	NaN	NaN	NaN	NaN	NaN	NaN	NaN	NaN	24.0099	NaN	24.5642	NaN	NaN	NaN	NaN	NaN	NaN	NaN	NaN	NaN	NaN	NaN	NaN	NaN	NaN
P68400;Q8NEV1	Casein kinase II subunit alpha;Casein kinase II subunit alpha 3	CSNK2A1;CSNK2A3	NaN	24.6524	NaN	NaN	NaN	NaN	NaN	NaN	NaN	NaN	NaN	NaN	NaN	NaN	NaN	NaN	NaN	NaN	NaN	NaN	NaN	NaN	22.9412	NaN	NaN	NaN	NaN	NaN	NaN	NaN	NaN	NaN	NaN	NaN	NaN	NaN	NaN	NaN	NaN	NaN	NaN	NaN	NaN	NaN	NaN	NaN	NaN
P67870	Casein kinase II subunit beta	CSNK2B	NaN	22.7063	NaN	NaN	NaN	NaN	NaN	NaN	NaN	NaN	NaN	NaN	NaN	NaN	NaN	NaN	NaN	NaN	NaN	NaN	NaN	NaN	NaN	NaN	NaN	NaN	NaN	NaN	NaN	NaN	NaN	NaN	NaN	NaN	NaN	NaN	NaN	NaN	NaN	NaN	NaN	NaN	NaN	NaN	NaN	NaN	NaN
Q6UVK1	Chondroitin sulfate proteoglycan 4	CSPG4	28.7346	28.4943	30.0268	27.6778	30.1469	30.7664	30.1453	31.0783	30.7878	30.7679	30.1868	30.409	29.2902	30.399	29.137	32.2999	31.5454	32.3782	32.1264	32.6013	32.7343	32.6338	29.7192	30.2957	29.4337	29.9768	31.2727	31.2869	30.5385	30.6563	30.1806	30.9095	30.4245	29.7195	29.5205	31.5013	29.702	30.7022	31.3505	32.0549	32.1016	31.7285	31.99	32.4683	30.8384	30.5203	31.4457
P21291	Cysteine and glycine-rich protein 1	CSRP1	26.2851	26.758	26.2862	27.7971	NaN	26.1938	NaN	NaN	NaN	NaN	23.465	26.9503	26.8039	28.6653	28.0651	26.2626	NaN	25.9406	26.9149	28.0749	NaN	NaN	26.1708	27.7945	27.8544	NaN	26.6568	25.3814	NaN	25.4712	NaN	26.8792	NaN	28.9189	27.8905	29.3431	27.619	NaN	NaN	NaN	28.8273	NaN	NaN	NaN	27.1262	27.3562	28.3352
Q16527	Cysteine and glycine-rich protein 2	CSRP2	NaN	NaN	NaN	NaN	NaN	NaN	NaN	NaN	NaN	NaN	NaN	NaN	NaN	NaN	NaN	NaN	NaN	NaN	NaN	NaN	NaN	NaN	NaN	NaN	NaN	NaN	NaN	NaN	NaN	NaN	NaN	NaN	NaN	NaN	NaN	NaN	NaN	NaN	NaN	NaN	NaN	NaN	NaN	NaN	NaN	NaN	NaN
P50461	Cysteine and glycine-rich protein 3	CSRP3	27.6046	NaN	NaN	27.7214	NaN	NaN	NaN	NaN	NaN	NaN	NaN	NaN	NaN	NaN	NaN	NaN	NaN	NaN	NaN	NaN	NaN	NaN	NaN	NaN	NaN	NaN	NaN	NaN	NaN	NaN	NaN	NaN	NaN	NaN	NaN	NaN	27.1591	NaN	NaN	NaN	NaN	27.3694	NaN	NaN	NaN	NaN	NaN
P01034	Cystatin-C	CST3	27.5533	27.4313	28.9359	27.6238	27.5627	28.308	29.5111	29.3437	29.2351	29.6909	28.7223	27.182	28.3215	29.0611	28.0756	29.7925	29.1817	29.6927	29.7942	29.621	30.0201	30.2626	28.7614	29.8623	28.744	29.1465	29.5458	30.0664	29.2792	28.9158	28.3176	29.5933	27.9533	28.4714	29.2812	28.7377	28.4426	29.5882	29.5871	30.3669	30.2667	29.5707	29.8098	29.6528	30.1974	30.3002	29.9066
P01040	Cystatin-A;Cystatin-A, N-terminally processed	CSTA	NaN	NaN	NaN	NaN	NaN	NaN	NaN	NaN	NaN	NaN	NaN	NaN	NaN	NaN	NaN	NaN	NaN	NaN	NaN	NaN	NaN	NaN	NaN	NaN	NaN	NaN	NaN	NaN	NaN	NaN	NaN	NaN	NaN	NaN	NaN	NaN	NaN	NaN	NaN	NaN	NaN	NaN	NaN	NaN	NaN	NaN	NaN
P04080	Cystatin-B	CSTB	26.8072	27.9271	NaN	26.962	NaN	NaN	NaN	NaN	NaN	NaN	NaN	24.2058	25.6315	25.6221	26.2957	NaN	NaN	NaN	NaN	NaN	NaN	NaN	27.3773	NaN	27.1678	NaN	NaN	NaN	23.586	NaN	NaN	NaN	NaN	27.7416	NaN	NaN	27.3944	NaN	NaN	24.966	NaN	NaN	NaN	NaN	NaN	24.6036	NaN
P33240;Q9H0L4	Cleavage stimulation factor subunit 2;Cleavage stimulation factor subunit 2 tau variant	CSTF2;CSTF2T	NaN	NaN	NaN	NaN	NaN	NaN	NaN	NaN	NaN	NaN	NaN	NaN	NaN	NaN	NaN	NaN	NaN	NaN	NaN	NaN	NaN	NaN	NaN	NaN	NaN	NaN	NaN	NaN	NaN	NaN	NaN	NaN	NaN	NaN	NaN	NaN	NaN	NaN	NaN	NaN	NaN	NaN	NaN	NaN	NaN	NaN	NaN
Q13363	C-terminal-binding protein 1	CTBP1	24.3838	23.9587	NaN	24.8173	NaN	NaN	NaN	NaN	NaN	NaN	NaN	NaN	NaN	NaN	NaN	NaN	NaN	NaN	NaN	NaN	NaN	NaN	NaN	NaN	NaN	NaN	NaN	NaN	NaN	NaN	NaN	NaN	NaN	NaN	NaN	NaN	NaN	NaN	NaN	NaN	NaN	NaN	NaN	NaN	NaN	NaN	NaN
Q01459	Di-N-acetylchitobiase	CTBS	NaN	NaN	NaN	NaN	NaN	NaN	NaN	NaN	NaN	NaN	NaN	NaN	NaN	NaN	NaN	NaN	NaN	NaN	NaN	NaN	NaN	NaN	NaN	NaN	NaN	NaN	NaN	NaN	NaN	NaN	NaN	NaN	NaN	NaN	NaN	NaN	NaN	NaN	NaN	NaN	NaN	NaN	NaN	NaN	NaN	NaN	NaN
P29279	Connective tissue growth factor	CTGF	26.3935	25.9282	27.9265	NaN	28.3002	28.5314	29.0621	27.8578	28.1777	29.4421	28.47	28.914	29.5368	29.1179	29.6379	29.5365	29.1921	29.3588	29.3835	29.1179	29.8137	29.5111	27.6544	29.2373	27.3704	29.0733	29.7269	30.2997	29.4639	29.6624	26.3328	29.8143	28.7116	28.95	29.3654	28.3697	28.312	30.2557	30.3921	29.2933	29.7247	28.9843	29.6578	29.2872	29.7283	29.578	29.4127
Q96CG8	Collagen triple helix repeat-containing protein 1	CTHRC1	NaN	26.6162	24.6135	NaN	NaN	25.2405	NaN	25.7339	NaN	25.1707	24.983	NaN	NaN	NaN	NaN	NaN	24.6678	25.8564	NaN	NaN	25.6481	26.7437	26.3906	NaN	NaN	NaN	NaN	NaN	NaN	NaN	NaN	NaN	NaN	NaN	NaN	NaN	NaN	NaN	NaN	26.6773	26.6271	NaN	NaN	25.8272	NaN	NaN	NaN
P35221	Catenin alpha-1	CTNNA1	24.9457	24.4672	NaN	NaN	NaN	NaN	NaN	NaN	NaN	NaN	NaN	NaN	NaN	NaN	NaN	NaN	NaN	NaN	24.928	NaN	NaN	NaN	24.9418	NaN	NaN	NaN	NaN	NaN	NaN	NaN	NaN	NaN	NaN	26.8332	NaN	NaN	NaN	NaN	NaN	NaN	NaN	NaN	NaN	NaN	NaN	NaN	NaN
P35222	Catenin beta-1	CTNNB1	29.5268	30.8797	31.7437	30.9078	28.3946	31.2286	33.7422	32.4827	30.0741	33.2331	30.1178	31.6271	29.913	32.4357	31.9093	29.1437	31.5139	32.5223	NaN	NaN	31.4629	32.7171	29.6584	31.855	32.1882	32.6847	31.295	31.3468	31.9874	32.1087	31.8751	32.5649	31.9629	32.3477	32.7491	NaN	NaN	32.7484	31.0312	NaN	30.8803	NaN	NaN	30.1049	32.4738	32.8534	33.4731
O60716	Catenin delta-1	CTNND1	NaN	23.4624	NaN	NaN	NaN	NaN	NaN	NaN	NaN	NaN	NaN	NaN	NaN	NaN	NaN	NaN	NaN	NaN	NaN	NaN	NaN	NaN	NaN	NaN	NaN	NaN	NaN	NaN	NaN	NaN	NaN	NaN	NaN	NaN	NaN	NaN	NaN	NaN	NaN	NaN	NaN	NaN	NaN	NaN	NaN	NaN	NaN
Q9NRF8	CTP synthase 2	CTPS2	NaN	22.2319	NaN	NaN	NaN	NaN	NaN	NaN	NaN	NaN	NaN	NaN	NaN	NaN	NaN	NaN	NaN	NaN	NaN	NaN	NaN	NaN	NaN	NaN	NaN	NaN	NaN	NaN	NaN	NaN	NaN	NaN	NaN	NaN	NaN	NaN	NaN	NaN	NaN	NaN	NaN	NaN	NaN	NaN	NaN	NaN	NaN
Q6GPI1;P17538	Chymotrypsinogen B2;Chymotrypsin B2 chain A;Chymotrypsin B2 chain B;Chymotrypsin B2 chain C;Chymotrypsinogen B;Chymotrypsin B chain A;Chymotrypsin B chain B;Chymotrypsin B chain C	CTRB2;CTRB1	NaN	NaN	NaN	NaN	NaN	NaN	NaN	NaN	NaN	NaN	22.3041	NaN	NaN	NaN	NaN	NaN	NaN	NaN	NaN	NaN	NaN	NaN	NaN	NaN	NaN	NaN	NaN	NaN	NaN	NaN	NaN	NaN	NaN	NaN	NaN	NaN	NaN	NaN	NaN	NaN	NaN	NaN	NaN	NaN	NaN	NaN	NaN
P10619	Lysosomal protective protein;Lysosomal protective protein 32 kDa chain;Lysosomal protective protein 20 kDa chain	CTSA	24.923	26.3161	NaN	NaN	NaN	NaN	NaN	NaN	NaN	NaN	NaN	NaN	NaN	NaN	NaN	23.6744	NaN	NaN	NaN	NaN	NaN	NaN	NaN	NaN	NaN	NaN	NaN	NaN	NaN	NaN	NaN	NaN	NaN	NaN	NaN	NaN	NaN	NaN	NaN	NaN	NaN	NaN	NaN	NaN	NaN	NaN	NaN
P07858	Cathepsin B;Cathepsin B light chain;Cathepsin B heavy chain	CTSB	29.9735	30.3195	27.7691	30.2285	26.0844	26.4965	25.4907	25.7186	25.5907	25.1357	25.461	25.1163	24.7664	25.9248	NaN	NaN	25.3877	24.7631	24.8247	NaN	NaN	25.3618	28.9576	27.8065	28.8908	25.6777	27.6226	27.352	26.5255	26.4033	26.6238	25.9669	25.8888	26.7383	NaN	NaN	26.9833	23.3009	NaN	NaN	NaN	NaN	NaN	NaN	27.6527	28.9952	25.2747
P53634	Dipeptidyl peptidase 1;Dipeptidyl peptidase 1 exclusion domain chain;Dipeptidyl peptidase 1 heavy chain;Dipeptidyl peptidase 1 light chain	CTSC	28.0243	25.4494	NaN	27.329	NaN	NaN	NaN	NaN	NaN	NaN	NaN	NaN	NaN	NaN	NaN	NaN	NaN	NaN	NaN	NaN	NaN	NaN	NaN	NaN	NaN	NaN	NaN	NaN	NaN	NaN	NaN	NaN	NaN	26.8003	NaN	NaN	NaN	NaN	NaN	NaN	NaN	NaN	NaN	NaN	NaN	24.6528	NaN
P07339	Cathepsin D;Cathepsin D light chain;Cathepsin D heavy chain	CTSD	30.5395	31.2896	30.0772	31.0172	27.8412	28.0899	27.1191	28.5387	27.9191	28.2152	27.7739	27.7381	27.9812	28.409	28.2187	27.1636	26.7343	26.493	NaN	NaN	NaN	NaN	29.5021	29.2656	30.2569	28.339	27.9668	27.4019	26.9529	26.9407	28.9588	27.4811	27.3825	27.7607	27.705	NaN	28.8254	26.928	26.8713	NaN	NaN	NaN	26.9879	NaN	29.3054	29.836	29.1151
Q9UBX1	Cathepsin F	CTSF	24.6828	24.0467	26.0886	NaN	25.5948	26.1264	NaN	NaN	NaN	24.3488	24.9919	24.4925	NaN	NaN	NaN	NaN	NaN	26.1088	NaN	NaN	NaN	27.1284	25.4414	26.093	25.9233	27.0166	25.558	NaN	24.9088	NaN	25.3947	NaN	NaN	NaN	NaN	NaN	NaN	NaN	NaN	NaN	NaN	NaN	NaN	NaN	26.8169	26.8604	NaN
P08311	Cathepsin G	CTSG	29.1255	28.159	NaN	29.5468	NaN	NaN	NaN	NaN	NaN	NaN	NaN	NaN	NaN	NaN	NaN	NaN	NaN	NaN	NaN	NaN	NaN	NaN	28.8295	27.2767	NaN	27.5672	26.4186	25.5278	NaN	NaN	NaN	25.487	NaN	NaN	NaN	NaN	NaN	NaN	NaN	NaN	NaN	25.4437	NaN	NaN	28.4778	NaN	27.5178
P09668	Pro-cathepsin H;Cathepsin H mini chain;Cathepsin H;Cathepsin H heavy chain;Cathepsin H light chain	CTSH	22.7524	NaN	NaN	NaN	NaN	NaN	NaN	NaN	NaN	NaN	NaN	NaN	NaN	NaN	NaN	NaN	NaN	NaN	NaN	NaN	NaN	NaN	NaN	NaN	NaN	NaN	NaN	NaN	NaN	NaN	NaN	NaN	NaN	NaN	NaN	NaN	NaN	NaN	NaN	NaN	NaN	NaN	NaN	NaN	NaN	NaN	NaN
P07711	Cathepsin L1;Cathepsin L1 heavy chain;Cathepsin L1 light chain	CTSL	24.4325	24.8921	NaN	NaN	NaN	NaN	NaN	NaN	NaN	NaN	NaN	NaN	NaN	NaN	NaN	NaN	NaN	NaN	NaN	NaN	NaN	NaN	NaN	NaN	NaN	NaN	NaN	NaN	NaN	NaN	NaN	NaN	NaN	NaN	NaN	NaN	NaN	NaN	NaN	NaN	NaN	NaN	NaN	NaN	NaN	NaN	NaN
P25774	Cathepsin S	CTSS	25.1969	24.6718	NaN	25.2611	NaN	NaN	NaN	NaN	NaN	NaN	NaN	26.5606	NaN	NaN	26.6974	NaN	NaN	NaN	NaN	NaN	NaN	NaN	25.4493	NaN	NaN	NaN	NaN	NaN	NaN	NaN	NaN	NaN	NaN	NaN	NaN	NaN	NaN	NaN	NaN	NaN	NaN	NaN	NaN	NaN	NaN	25.3418	NaN
Q9UBR2	Cathepsin Z	CTSZ	28.3742	28.62	24.7629	28.2013	NaN	24.2821	NaN	24.0603	24.437	NaN	NaN	NaN	NaN	NaN	NaN	23.6944	NaN	24.831	NaN	NaN	25.6662	25.3822	25.7081	NaN	26.0846	NaN	NaN	NaN	NaN	NaN	NaN	NaN	NaN	25.0062	NaN	NaN	NaN	NaN	NaN	NaN	NaN	NaN	NaN	NaN	24.581	25.9651	23.4305
Q14247	Src substrate cortactin	CTTN	NaN	25.7551	NaN	NaN	NaN	NaN	NaN	NaN	NaN	NaN	NaN	24.9584	27.2989	NaN	NaN	NaN	NaN	NaN	NaN	NaN	NaN	NaN	25.741	NaN	NaN	NaN	NaN	NaN	NaN	NaN	NaN	NaN	NaN	26.3702	NaN	NaN	NaN	NaN	NaN	NaN	NaN	NaN	NaN	NaN	NaN	NaN	NaN
Q13618	Cullin-3	CUL3	NaN	NaN	NaN	22.6278	NaN	NaN	NaN	NaN	NaN	NaN	NaN	NaN	NaN	NaN	NaN	NaN	NaN	NaN	NaN	NaN	NaN	NaN	NaN	NaN	NaN	NaN	NaN	NaN	NaN	NaN	NaN	NaN	NaN	NaN	NaN	NaN	NaN	NaN	NaN	NaN	NaN	NaN	NaN	NaN	NaN	NaN	NaN
Q93034	Cullin-5	CUL5	NaN	23.5546	NaN	NaN	NaN	NaN	NaN	NaN	NaN	NaN	NaN	NaN	NaN	NaN	NaN	NaN	NaN	NaN	NaN	NaN	NaN	NaN	NaN	NaN	NaN	NaN	NaN	NaN	NaN	NaN	NaN	NaN	NaN	NaN	NaN	NaN	NaN	NaN	NaN	NaN	NaN	NaN	NaN	NaN	NaN	NaN	NaN
O60888	Protein CutA	CUTA	NaN	NaN	NaN	21.8856	NaN	NaN	NaN	NaN	NaN	NaN	NaN	NaN	NaN	NaN	NaN	NaN	NaN	NaN	NaN	NaN	NaN	NaN	24.9949	24.9252	NaN	NaN	24.9636	NaN	NaN	NaN	NaN	NaN	NaN	24.9215	NaN	NaN	NaN	NaN	NaN	NaN	NaN	NaN	NaN	NaN	NaN	NaN	NaN
Q9NTM9	Copper homeostasis protein cutC homolog	CUTC	NaN	NaN	NaN	23.9528	NaN	NaN	NaN	NaN	NaN	NaN	NaN	NaN	NaN	NaN	NaN	NaN	NaN	NaN	NaN	NaN	NaN	NaN	NaN	NaN	NaN	NaN	NaN	NaN	NaN	NaN	NaN	NaN	NaN	NaN	NaN	NaN	NaN	NaN	NaN	NaN	NaN	NaN	NaN	NaN	NaN	NaN	NaN
Q69YN2	CWF19-like protein 1	CWF19L1	NaN	NaN	NaN	NaN	NaN	NaN	NaN	NaN	NaN	NaN	NaN	NaN	NaN	NaN	NaN	NaN	NaN	NaN	NaN	NaN	NaN	NaN	NaN	NaN	NaN	NaN	NaN	NaN	NaN	NaN	NaN	NaN	NaN	NaN	NaN	NaN	NaN	NaN	NaN	NaN	NaN	NaN	NaN	NaN	NaN	NaN	NaN
P02778	C-X-C motif chemokine 10;CXCL10(1-73)	CXCL10	NaN	NaN	NaN	NaN	NaN	NaN	NaN	NaN	NaN	NaN	NaN	NaN	NaN	NaN	NaN	NaN	NaN	NaN	NaN	NaN	NaN	22.4705	NaN	NaN	NaN	NaN	NaN	NaN	NaN	NaN	NaN	NaN	NaN	NaN	NaN	NaN	NaN	NaN	NaN	NaN	NaN	NaN	NaN	NaN	NaN	NaN	NaN
P48061	Stromal cell-derived factor 1;SDF-1-beta(3-72);SDF-1-alpha(3-67)	CXCL12	24.2083	25.5638	26.6079	NaN	27.075	27.7217	27.5048	27.3345	27.6229	28.4196	27.0926	27.3099	27.6227	28.4264	27.5811	29.3559	29.1517	29.7343	30.5419	29.6731	30.534	29.7181	26.5031	29.593	27.2371	28.8463	26.8173	29.1995	27.6158	26.3143	27.3775	28.9803	28.781	26.5358	27.8355	26.4925	27.1432	29.418	30.126	30.1733	28.4559	29.8467	30.2682	29.9666	30.7501	29.9415	29.7623
O95715	C-X-C motif chemokine 14	CXCL14	NaN	NaN	NaN	NaN	NaN	NaN	NaN	NaN	NaN	NaN	NaN	NaN	NaN	NaN	NaN	27.3732	25.277	NaN	26.4959	NaN	NaN	26.7129	NaN	NaN	NaN	NaN	NaN	NaN	NaN	NaN	NaN	NaN	NaN	NaN	NaN	NaN	NaN	NaN	NaN	NaN	26.3862	NaN	NaN	NaN	NaN	NaN	NaN
Q9H2A7	C-X-C motif chemokine 16	CXCL16	NaN	NaN	26.397	NaN	NaN	NaN	NaN	NaN	NaN	NaN	NaN	NaN	NaN	NaN	NaN	NaN	NaN	NaN	NaN	NaN	NaN	NaN	NaN	NaN	NaN	NaN	NaN	NaN	NaN	NaN	NaN	NaN	NaN	NaN	NaN	NaN	NaN	NaN	NaN	NaN	NaN	NaN	NaN	NaN	NaN	NaN	NaN
P00167	Cytochrome b5	CYB5A	26.8401	26.4646	NaN	27.3935	NaN	NaN	NaN	NaN	NaN	NaN	NaN	NaN	NaN	NaN	NaN	27.0683	NaN	NaN	NaN	NaN	NaN	NaN	25.7218	NaN	NaN	NaN	NaN	NaN	NaN	NaN	NaN	NaN	NaN	NaN	NaN	NaN	NaN	NaN	NaN	NaN	NaN	NaN	NaN	NaN	NaN	NaN	NaN
O43169	Cytochrome b5 type B	CYB5B	21.7341	NaN	NaN	NaN	NaN	NaN	NaN	NaN	NaN	NaN	NaN	NaN	NaN	NaN	NaN	NaN	NaN	NaN	NaN	NaN	NaN	NaN	NaN	NaN	NaN	NaN	NaN	NaN	NaN	NaN	NaN	NaN	NaN	NaN	NaN	NaN	NaN	NaN	NaN	NaN	NaN	NaN	NaN	NaN	NaN	NaN	NaN
Q9UHQ9	NADH-cytochrome b5 reductase 1	CYB5R1	28.1085	26.5272	NaN	26.8317	NaN	NaN	NaN	26.3693	NaN	NaN	NaN	NaN	NaN	NaN	NaN	NaN	NaN	NaN	NaN	NaN	NaN	NaN	25.5057	NaN	NaN	NaN	NaN	NaN	24.1987	26.3586	NaN	26.5754	NaN	NaN	NaN	NaN	NaN	NaN	NaN	NaN	25.2388	NaN	NaN	NaN	NaN	NaN	NaN
P00387	NADH-cytochrome b5 reductase 3;NADH-cytochrome b5 reductase 3 membrane-bound form;NADH-cytochrome b5 reductase 3 soluble form	CYB5R3	28.3724	28.1948	NaN	27.9571	24.8525	24.3853	NaN	25.2539	NaN	NaN	NaN	26.3373	27.437	26.2721	25.8489	25.9631	25.2932	26.2146	NaN	NaN	26.4718	26.0696	27.8705	NaN	27.0055	NaN	NaN	NaN	24.8645	NaN	NaN	NaN	NaN	27.6126	26.7285	27.0006	28.0426	25.2472	NaN	NaN	22.2287	NaN	NaN	24.7533	25.7469	26.0845	NaN
Q53TN4	Cytochrome b reductase 1	CYBRD1	24.4898	NaN	NaN	NaN	NaN	NaN	NaN	NaN	NaN	NaN	NaN	NaN	NaN	NaN	24.7637	NaN	NaN	NaN	NaN	NaN	NaN	NaN	NaN	NaN	NaN	NaN	NaN	NaN	NaN	NaN	NaN	NaN	NaN	NaN	NaN	NaN	NaN	NaN	NaN	NaN	NaN	NaN	NaN	NaN	NaN	NaN	NaN
P08574	Cytochrome c1, heme protein, mitochondrial	CYC1	26.0645	25.5968	NaN	25.4039	NaN	NaN	NaN	NaN	NaN	NaN	NaN	NaN	NaN	NaN	NaN	27.1646	26.7777	27.0394	NaN	NaN	NaN	NaN	NaN	NaN	NaN	NaN	NaN	NaN	NaN	NaN	NaN	NaN	NaN	NaN	NaN	NaN	NaN	NaN	NaN	NaN	NaN	NaN	NaN	NaN	NaN	NaN	NaN
P99999	Cytochrome c	CYCS	24.6622	23.6744	NaN	26.7416	NaN	NaN	NaN	NaN	NaN	NaN	NaN	NaN	NaN	NaN	23.8754	NaN	NaN	NaN	NaN	NaN	NaN	NaN	NaN	NaN	NaN	NaN	NaN	NaN	NaN	NaN	NaN	NaN	NaN	NaN	NaN	NaN	NaN	NaN	NaN	NaN	NaN	NaN	NaN	NaN	NaN	NaN	NaN
Q7L576	Cytoplasmic FMR1-interacting protein 1	CYFIP1	23.9826	24.8873	NaN	NaN	NaN	NaN	NaN	NaN	NaN	NaN	NaN	NaN	23.8036	NaN	NaN	26.1985	NaN	NaN	NaN	NaN	NaN	NaN	25.4856	NaN	27.3614	NaN	NaN	NaN	NaN	NaN	NaN	NaN	NaN	NaN	NaN	NaN	NaN	NaN	NaN	NaN	NaN	NaN	NaN	NaN	NaN	NaN	NaN
Q8WWM9	Cytoglobin	CYGB	NaN	24.5334	NaN	NaN	NaN	NaN	NaN	NaN	NaN	NaN	NaN	NaN	NaN	NaN	NaN	NaN	NaN	NaN	NaN	NaN	NaN	NaN	NaN	NaN	NaN	NaN	NaN	NaN	NaN	NaN	NaN	NaN	NaN	NaN	NaN	NaN	NaN	NaN	NaN	NaN	NaN	NaN	NaN	NaN	NaN	NaN	NaN
O00622	Protein CYR61	CYR61	NaN	23.9849	28.3866	NaN	24.7545	26.8103	24.7843	NaN	23.9931	NaN	24.4785	23.8521	NaN	NaN	NaN	NaN	NaN	NaN	NaN	NaN	NaN	NaN	23.9815	24.8025	25.5941	24.3883	NaN	NaN	24.0159	23.4483	25.6884	NaN	25.7019	NaN	NaN	NaN	NaN	NaN	NaN	NaN	NaN	NaN	NaN	NaN	25.8889	24.585	27.6937
Q9NRR1	Cytokine-like protein 1	CYTL1	27.0914	NaN	29.2752	NaN	29.5238	28.1595	29.3891	28.2292	29.672	29.0183	28.2538	28.6926	30.5672	30.5255	29.1162	30.6822	30.2711	31.1622	31.5338	30.4851	30.9215	30.1131	28.4714	29.8967	29.1677	29.6787	30.5169	30.2551	29.5224	29.4888	29.2714	29.4069	29.6588	28.099	31.2799	31.4938	28.758	30.3864	29.9123	31.0859	31.4034	31.2943	31.3236	30.8743	29.4017	30.7547	29.4577
P98082	Disabled homolog 2	DAB2	25.5546	26.0275	NaN	24.2065	NaN	NaN	NaN	NaN	NaN	NaN	NaN	NaN	NaN	NaN	NaN	NaN	NaN	NaN	NaN	NaN	NaN	NaN	25.1313	NaN	NaN	NaN	26.4031	NaN	26.4223	NaN	NaN	NaN	NaN	NaN	NaN	NaN	NaN	NaN	NaN	NaN	NaN	NaN	NaN	NaN	NaN	NaN	NaN
P61803	Dolichyl-diphosphooligosaccharide--protein glycosyltransferase subunit DAD1	DAD1	NaN	NaN	NaN	NaN	NaN	NaN	NaN	NaN	NaN	NaN	NaN	NaN	NaN	NaN	NaN	NaN	NaN	NaN	NaN	NaN	NaN	NaN	NaN	NaN	NaN	NaN	NaN	NaN	NaN	NaN	NaN	NaN	NaN	NaN	NaN	NaN	NaN	NaN	NaN	NaN	NaN	NaN	NaN	NaN	NaN	NaN	NaN
Q14118	Dystroglycan;Alpha-dystroglycan;Beta-dystroglycan	DAG1	27.3078	26.3894	26.7516	28.0272	25.3633	26.2827	26.6461	NaN	27.8137	27.2928	25.9171	25.9193	26.4755	25.7934	24.8375	27.5625	26.9827	27.7194	27.2662	NaN	28.0435	27.7352	24.1809	24.9351	NaN	NaN	26.8049	26.1495	27.7918	26.0983	NaN	27.5704	27.3624	NaN	26.8174	NaN	NaN	29.1773	27.7285	26.9993	28.7266	25.6457	29.0557	NaN	28.5944	26.0719	NaN
Q3LXA3	Bifunctional ATP-dependent dihydroxyacetone kinase/FAD-AMP lyase (cyclizing);ATP-dependent dihydroxyacetone kinase;FAD-AMP lyase (cyclizing)	DAK	26.903	25.3204	NaN	NaN	NaN	29.229	NaN	NaN	NaN	NaN	NaN	NaN	27.4672	NaN	NaN	NaN	NaN	NaN	NaN	NaN	NaN	NaN	28.9466	NaN	NaN	NaN	26.7523	NaN	NaN	NaN	NaN	NaN	NaN	NaN	NaN	NaN	NaN	NaN	NaN	NaN	NaN	NaN	NaN	NaN	NaN	NaN	NaN
P14868	Aspartate--tRNA ligase, cytoplasmic	DARS	26.7546	27.0807	26.1101	26.1285	25.7805	25.0479	24.6032	NaN	NaN	25.0039	NaN	27.4249	26.5829	26.0948	26.1037	26.4332	25.6755	27.04	NaN	NaN	NaN	25.1933	26.642	25.9082	26.3933	26.1142	25.0235	26.9984	NaN	25.858	NaN	NaN	NaN	27.0963	27.3969	NaN	NaN	NaN	NaN	NaN	NaN	NaN	NaN	NaN	27.492	26.0093	NaN
Q96EP5	DAZ-associated protein 1	DAZAP1	24.1495	24.9252	NaN	24.0874	NaN	NaN	NaN	NaN	NaN	NaN	NaN	NaN	NaN	NaN	NaN	NaN	NaN	NaN	NaN	NaN	NaN	NaN	NaN	NaN	NaN	NaN	NaN	NaN	NaN	NaN	NaN	NaN	NaN	NaN	NaN	NaN	NaN	NaN	NaN	NaN	NaN	NaN	NaN	NaN	NaN	NaN	NaN
P09172	Dopamine beta-hydroxylase;Soluble dopamine beta-hydroxylase	DBH	NaN	NaN	NaN	21.5119	NaN	NaN	NaN	NaN	NaN	NaN	NaN	NaN	NaN	NaN	NaN	NaN	NaN	NaN	NaN	NaN	NaN	NaN	NaN	NaN	NaN	NaN	NaN	NaN	NaN	NaN	NaN	NaN	NaN	NaN	NaN	NaN	NaN	NaN	NaN	NaN	NaN	NaN	NaN	NaN	NaN	NaN	NaN
P07108	Acyl-CoA-binding protein	DBI	26.4673	24.6818	NaN	28.0777	NaN	NaN	NaN	NaN	NaN	NaN	NaN	NaN	NaN	NaN	26.4265	NaN	NaN	NaN	NaN	NaN	NaN	NaN	27.1481	25.425	NaN	NaN	NaN	NaN	NaN	NaN	NaN	NaN	NaN	26.8046	NaN	NaN	NaN	NaN	NaN	NaN	NaN	NaN	NaN	NaN	26.7326	NaN	NaN
Q16643	Drebrin	DBN1	25.6906	25.8546	NaN	24.5777	NaN	NaN	NaN	NaN	NaN	NaN	NaN	NaN	NaN	NaN	NaN	NaN	NaN	NaN	NaN	NaN	NaN	NaN	24.4425	NaN	NaN	NaN	NaN	NaN	NaN	NaN	NaN	NaN	NaN	NaN	NaN	NaN	NaN	NaN	NaN	NaN	NaN	NaN	NaN	NaN	NaN	NaN	NaN
Q9UJU6	Drebrin-like protein	DBNL	27.714	26.5812	26.4544	28.0505	NaN	NaN	NaN	NaN	NaN	NaN	27.3041	26.0049	28.0843	NaN	26.9719	26.9317	NaN	27.4647	NaN	NaN	NaN	27.9186	26.4873	NaN	28.0218	NaN	NaN	NaN	26.4532	NaN	NaN	NaN	NaN	27.1969	26.9362	NaN	28.1559	NaN	NaN	NaN	NaN	NaN	NaN	NaN	27.6949	26.5091	27.844
P61962	DDB1- and CUL4-associated factor 7	DCAF7	NaN	NaN	NaN	NaN	NaN	NaN	NaN	NaN	NaN	NaN	NaN	NaN	NaN	NaN	NaN	NaN	NaN	NaN	NaN	NaN	NaN	NaN	NaN	NaN	NaN	NaN	NaN	NaN	NaN	NaN	NaN	NaN	NaN	NaN	23.8083	NaN	NaN	NaN	NaN	NaN	NaN	NaN	NaN	NaN	NaN	NaN	NaN
P81605	Dermcidin;Survival-promoting peptide;DCD-1	DCD	NaN	NaN	NaN	NaN	25.8984	NaN	NaN	NaN	NaN	NaN	NaN	NaN	NaN	NaN	NaN	27.2636	NaN	NaN	28.5149	NaN	NaN	26.5028	NaN	NaN	NaN	NaN	NaN	NaN	NaN	NaN	NaN	NaN	NaN	NaN	NaN	NaN	NaN	NaN	NaN	NaN	NaN	NaN	NaN	NaN	NaN	NaN	NaN
O15075	Serine/threonine-protein kinase DCLK1	DCLK1	23.564	23.8996	NaN	NaN	NaN	NaN	NaN	NaN	NaN	NaN	NaN	NaN	NaN	NaN	NaN	NaN	NaN	NaN	NaN	NaN	NaN	NaN	NaN	NaN	NaN	NaN	NaN	NaN	NaN	NaN	NaN	NaN	NaN	NaN	NaN	NaN	NaN	NaN	NaN	NaN	NaN	NaN	NaN	NaN	NaN	NaN	NaN
P07585	Decorin	DCN	35.917	35.2742	35.9011	35.5772	36.5647	35.871	35.3614	34.8024	35.0727	35.715	35.1693	37.1945	37.7435	37.755	37.8045	36.9558	37.2247	36.4228	36.5132	36.3819	36.5833	35.7348	36.7501	36.5875	35.1533	36.5297	37.2071	37.0684	35.8965	35.9984	34.9792	35.6185	35.0706	37.0389	37.5468	37.015	37.0109	37.2089	36.7824	35.9207	36.3167	36.474	36.7211	34.66	37.8842	37.8791	37.2773
Q96C86	m7GpppX diphosphatase	DCPS	NaN	25.1313	NaN	24.6776	NaN	NaN	NaN	NaN	NaN	NaN	NaN	NaN	NaN	NaN	NaN	NaN	NaN	NaN	NaN	NaN	NaN	NaN	NaN	NaN	NaN	25.501	NaN	NaN	NaN	NaN	NaN	NaN	NaN	NaN	NaN	NaN	NaN	NaN	NaN	NaN	NaN	NaN	NaN	NaN	NaN	NaN	NaN
Q14203	Dynactin subunit 1	DCTN1	26.5001	27.2998	NaN	25.6065	NaN	NaN	NaN	24.3772	NaN	NaN	NaN	NaN	NaN	NaN	NaN	24.2633	NaN	NaN	NaN	NaN	NaN	24.3581	24.9026	NaN	NaN	26.0723	NaN	NaN	NaN	NaN	NaN	NaN	NaN	25.0825	NaN	NaN	25.3322	NaN	NaN	NaN	NaN	NaN	NaN	NaN	NaN	NaN	NaN
Q13561	Dynactin subunit 2	DCTN2	27.579	28.0533	24.7049	28.5205	NaN	24.7042	NaN	NaN	NaN	NaN	NaN	NaN	25.982	NaN	NaN	25.0116	NaN	NaN	NaN	NaN	NaN	24.616	26.5942	NaN	NaN	NaN	NaN	NaN	24.2196	NaN	NaN	NaN	NaN	27.0769	25.4272	NaN	24.7966	NaN	NaN	NaN	NaN	NaN	NaN	25.912	24.7662	27.1036	NaN
O75935	Dynactin subunit 3	DCTN3	NaN	NaN	NaN	24.0972	NaN	NaN	NaN	NaN	NaN	NaN	NaN	NaN	NaN	NaN	NaN	NaN	NaN	NaN	NaN	NaN	NaN	NaN	NaN	NaN	NaN	NaN	NaN	NaN	NaN	NaN	NaN	NaN	NaN	NaN	NaN	NaN	NaN	NaN	NaN	NaN	NaN	NaN	NaN	NaN	NaN	NaN	NaN
Q9UJW0	Dynactin subunit 4	DCTN4	24.596	25.2251	NaN	24.4882	NaN	NaN	NaN	NaN	NaN	NaN	NaN	NaN	NaN	NaN	NaN	NaN	NaN	NaN	NaN	NaN	NaN	NaN	NaN	NaN	NaN	NaN	NaN	NaN	NaN	NaN	NaN	NaN	NaN	NaN	NaN	NaN	NaN	NaN	NaN	NaN	NaN	NaN	NaN	NaN	NaN	NaN	NaN
Q7Z4W1	L-xylulose reductase	DCXR	NaN	NaN	NaN	NaN	NaN	NaN	NaN	NaN	NaN	NaN	NaN	NaN	NaN	NaN	NaN	NaN	NaN	NaN	NaN	NaN	NaN	NaN	NaN	NaN	NaN	NaN	NaN	NaN	NaN	NaN	NaN	NaN	NaN	NaN	NaN	NaN	NaN	NaN	NaN	NaN	NaN	NaN	NaN	NaN	NaN	NaN	NaN
O94760	N(G),N(G)-dimethylarginine dimethylaminohydrolase 1	DDAH1	24.8983	24.1309	NaN	25.8537	NaN	NaN	NaN	NaN	NaN	NaN	NaN	NaN	NaN	NaN	NaN	NaN	NaN	NaN	NaN	NaN	NaN	NaN	NaN	NaN	NaN	NaN	NaN	NaN	NaN	NaN	NaN	NaN	NaN	NaN	NaN	NaN	NaN	NaN	NaN	NaN	NaN	NaN	NaN	NaN	NaN	NaN	NaN
O95865	N(G),N(G)-dimethylarginine dimethylaminohydrolase 2	DDAH2	28.0671	28.3743	NaN	28.4937	NaN	NaN	NaN	NaN	NaN	NaN	NaN	24.3684	25.9237	25.9268	27.2926	24.0256	NaN	NaN	NaN	NaN	NaN	NaN	24.8179	NaN	25.5041	NaN	NaN	NaN	NaN	NaN	NaN	NaN	NaN	27.1733	NaN	NaN	NaN	NaN	NaN	NaN	NaN	NaN	NaN	NaN	NaN	26.004	NaN
Q16531	DNA damage-binding protein 1	DDB1	25.9063	23.8757	26.3561	NaN	NaN	25.6603	NaN	NaN	NaN	NaN	NaN	NaN	NaN	NaN	NaN	NaN	NaN	NaN	NaN	27.3236	NaN	28.0809	NaN	NaN	NaN	NaN	NaN	NaN	NaN	NaN	NaN	NaN	NaN	NaN	NaN	NaN	NaN	NaN	NaN	NaN	NaN	NaN	NaN	NaN	NaN	NaN	NaN
Q5TDH0	Protein DDI1 homolog 2	DDI2	NaN	NaN	NaN	NaN	NaN	NaN	NaN	NaN	NaN	NaN	NaN	NaN	NaN	NaN	NaN	NaN	NaN	NaN	NaN	NaN	NaN	NaN	NaN	NaN	NaN	NaN	NaN	NaN	NaN	NaN	NaN	NaN	NaN	NaN	NaN	NaN	NaN	NaN	NaN	NaN	NaN	NaN	NaN	NaN	NaN	NaN	NaN
P39656	Dolichyl-diphosphooligosaccharide--protein glycosyltransferase 48 kDa subunit	DDOST	26.9644	27.5065	NaN	26.3371	NaN	NaN	NaN	NaN	NaN	24.539	NaN	26.0923	26.3051	26.5598	NaN	NaN	NaN	NaN	NaN	24.8035	25.0597	26.3039	26.542	NaN	24.9647	25.3272	NaN	NaN	NaN	NaN	NaN	NaN	NaN	25.7437	26.3458	NaN	25.7655	NaN	NaN	NaN	NaN	NaN	NaN	NaN	25.7543	25.5022	25.7337
Q96HY6	DDRGK domain-containing protein 1	DDRGK1	24.8356	24.8721	NaN	25.4332	NaN	NaN	NaN	NaN	NaN	NaN	NaN	NaN	NaN	NaN	NaN	NaN	NaN	NaN	NaN	NaN	NaN	NaN	NaN	NaN	NaN	NaN	NaN	NaN	NaN	NaN	NaN	NaN	NaN	NaN	NaN	NaN	NaN	NaN	NaN	NaN	NaN	NaN	NaN	NaN	NaN	NaN	NaN
P30046;A6NHG4	D-dopachrome decarboxylase;D-dopachrome decarboxylase-like protein	DDT;DDTL	NaN	23.0619	NaN	23.8623	NaN	NaN	NaN	NaN	NaN	NaN	NaN	NaN	NaN	NaN	NaN	NaN	NaN	NaN	NaN	NaN	NaN	NaN	NaN	NaN	NaN	NaN	NaN	NaN	NaN	NaN	NaN	NaN	NaN	NaN	22.9149	NaN	NaN	NaN	NaN	NaN	NaN	NaN	NaN	NaN	NaN	NaN	NaN
Q92499	ATP-dependent RNA helicase DDX1	DDX1	26.1235	25.8222	NaN	27.5619	NaN	NaN	NaN	NaN	25.5161	NaN	NaN	NaN	24.2196	NaN	NaN	NaN	NaN	NaN	NaN	NaN	NaN	NaN	26.0758	NaN	NaN	NaN	NaN	NaN	24.6893	NaN	NaN	NaN	NaN	NaN	NaN	NaN	23.8218	NaN	NaN	NaN	NaN	23.7432	23.6273	NaN	NaN	NaN	23.9705
Q92841	Probable ATP-dependent RNA helicase DDX17	DDX17	27.2724	27.9663	NaN	27.472	NaN	25.8146	NaN	NaN	NaN	NaN	24.8404	25.8298	26.0867	26.4241	26.0577	NaN	NaN	NaN	NaN	NaN	NaN	25.784	26.9577	25.1603	NaN	NaN	25.776	NaN	NaN	NaN	NaN	26.1652	NaN	26.331	26.3224	NaN	27.1658	NaN	26.0909	NaN	NaN	NaN	NaN	NaN	NaN	NaN	NaN
Q9NUU7;Q9UMR2	ATP-dependent RNA helicase DDX19A;ATP-dependent RNA helicase DDX19B	DDX19A;DDX19B	24.5686	23.5851	NaN	24.2092	NaN	NaN	NaN	NaN	NaN	NaN	NaN	NaN	NaN	NaN	NaN	NaN	NaN	NaN	NaN	NaN	NaN	NaN	NaN	NaN	NaN	NaN	NaN	NaN	NaN	NaN	NaN	NaN	NaN	NaN	NaN	NaN	NaN	NaN	NaN	NaN	NaN	NaN	NaN	NaN	NaN	NaN	NaN
Q9BUQ8	Probable ATP-dependent RNA helicase DDX23	DDX23	NaN	NaN	NaN	23.8705	NaN	NaN	NaN	NaN	NaN	NaN	NaN	NaN	NaN	NaN	NaN	NaN	NaN	NaN	NaN	NaN	NaN	NaN	NaN	NaN	NaN	NaN	NaN	NaN	NaN	NaN	NaN	NaN	NaN	NaN	NaN	NaN	NaN	NaN	NaN	NaN	NaN	NaN	NaN	NaN	NaN	NaN	NaN
Q13838;O00148	Spliceosome RNA helicase DDX39B;ATP-dependent RNA helicase DDX39A	DDX39B;DDX39A	26.5855	26.8267	26.0864	26.7506	25.6606	NaN	NaN	27.1898	NaN	27.3974	NaN	25.855	26.7801	NaN	25.8928	25.8009	NaN	NaN	NaN	NaN	NaN	NaN	26.1409	NaN	NaN	NaN	NaN	NaN	NaN	NaN	NaN	NaN	NaN	NaN	NaN	NaN	NaN	NaN	NaN	28.386	28.9932	NaN	NaN	NaN	NaN	27.1509	NaN
O00571;O15523	ATP-dependent RNA helicase DDX3X;ATP-dependent RNA helicase DDX3Y	DDX3X;DDX3Y	NaN	21.6869	NaN	NaN	NaN	NaN	NaN	NaN	NaN	NaN	NaN	NaN	NaN	NaN	NaN	NaN	NaN	NaN	NaN	NaN	NaN	NaN	NaN	NaN	NaN	NaN	NaN	NaN	NaN	NaN	NaN	NaN	NaN	NaN	NaN	NaN	NaN	NaN	NaN	NaN	NaN	NaN	NaN	NaN	NaN	NaN	NaN
Q86XP3	ATP-dependent RNA helicase DDX42	DDX42	NaN	NaN	NaN	21.8057	NaN	NaN	NaN	NaN	NaN	NaN	NaN	NaN	NaN	NaN	NaN	NaN	NaN	NaN	NaN	NaN	NaN	NaN	NaN	NaN	NaN	NaN	NaN	NaN	NaN	NaN	NaN	NaN	NaN	NaN	NaN	NaN	NaN	NaN	NaN	NaN	NaN	NaN	NaN	NaN	NaN	24.6256	NaN
Q7L014	Probable ATP-dependent RNA helicase DDX46	DDX46	NaN	22.8128	NaN	NaN	NaN	NaN	NaN	NaN	NaN	NaN	NaN	NaN	NaN	NaN	NaN	NaN	NaN	NaN	NaN	NaN	NaN	NaN	NaN	NaN	NaN	NaN	NaN	NaN	NaN	NaN	NaN	NaN	NaN	NaN	NaN	NaN	NaN	NaN	NaN	NaN	NaN	NaN	NaN	NaN	NaN	NaN	NaN
P17844	Probable ATP-dependent RNA helicase DDX5	DDX5	NaN	NaN	NaN	22.4802	NaN	NaN	NaN	NaN	NaN	NaN	NaN	NaN	NaN	NaN	NaN	NaN	NaN	NaN	NaN	NaN	NaN	NaN	NaN	NaN	NaN	NaN	NaN	NaN	NaN	NaN	NaN	NaN	NaN	NaN	NaN	NaN	NaN	NaN	NaN	NaN	NaN	NaN	NaN	NaN	NaN	NaN	NaN
P26196	Probable ATP-dependent RNA helicase DDX6	DDX6	NaN	NaN	NaN	NaN	NaN	NaN	NaN	NaN	NaN	NaN	NaN	NaN	NaN	NaN	NaN	NaN	NaN	NaN	NaN	NaN	NaN	NaN	22.9697	NaN	NaN	NaN	NaN	NaN	NaN	NaN	NaN	NaN	NaN	NaN	NaN	NaN	NaN	NaN	NaN	NaN	NaN	NaN	NaN	NaN	NaN	NaN	NaN
Q16698	2,4-dienoyl-CoA reductase, mitochondrial	DECR1	26.436	26.2569	NaN	26.9528	NaN	NaN	NaN	NaN	NaN	NaN	NaN	NaN	NaN	NaN	NaN	NaN	NaN	NaN	NaN	NaN	NaN	NaN	24.8935	NaN	NaN	NaN	NaN	NaN	NaN	NaN	NaN	NaN	NaN	NaN	NaN	NaN	NaN	NaN	NaN	NaN	NaN	NaN	NaN	NaN	NaN	NaN	NaN
P59666;P59665	Neutrophil defensin 3;HP 3-56;Neutrophil defensin 2;Neutrophil defensin 1;HP 1-56;Neutrophil defensin 2	DEFA3;DEFA1	NaN	NaN	NaN	26.7884	25.4571	26.695	NaN	27.2376	NaN	26.0531	23.1491	NaN	NaN	NaN	NaN	NaN	NaN	NaN	NaN	NaN	NaN	NaN	25.8383	28.012	NaN	NaN	NaN	NaN	NaN	25.5887	25.0446	NaN	NaN	NaN	NaN	NaN	NaN	NaN	NaN	NaN	NaN	NaN	NaN	NaN	28.4826	26.4323	27.2504
Q01523	Defensin-5;HD5(23-94);HD5(29-94);HD5(56-94);HD5(63-94)	DEFA5	NaN	NaN	NaN	NaN	NaN	NaN	NaN	NaN	NaN	NaN	NaN	NaN	NaN	NaN	NaN	NaN	NaN	NaN	NaN	NaN	NaN	NaN	NaN	NaN	NaN	NaN	NaN	NaN	NaN	NaN	NaN	27.0605	NaN	NaN	NaN	NaN	NaN	NaN	NaN	NaN	NaN	NaN	NaN	NaN	NaN	NaN	NaN
P35659	Protein DEK	DEK	25.9863	26.4769	NaN	26.8388	NaN	NaN	NaN	NaN	NaN	NaN	NaN	25.7506	25.4449	NaN	NaN	NaN	NaN	NaN	27.1342	NaN	NaN	NaN	NaN	NaN	NaN	NaN	NaN	NaN	NaN	NaN	NaN	NaN	NaN	NaN	27.1647	NaN	NaN	NaN	NaN	27.4625	NaN	26.922	NaN	NaN	NaN	NaN	26.6157
O43583	Density-regulated protein	DENR	24.7039	25.2497	NaN	26.2807	NaN	NaN	NaN	NaN	NaN	NaN	NaN	NaN	NaN	NaN	NaN	NaN	NaN	NaN	NaN	NaN	NaN	NaN	25.2992	NaN	NaN	NaN	NaN	NaN	NaN	NaN	NaN	NaN	NaN	NaN	NaN	NaN	25.7207	NaN	NaN	NaN	NaN	NaN	NaN	NaN	NaN	NaN	NaN
Q9Y315	Deoxyribose-phosphate aldolase	DERA	21.3915	NaN	NaN	NaN	NaN	NaN	NaN	NaN	NaN	NaN	NaN	NaN	NaN	NaN	NaN	NaN	NaN	NaN	NaN	NaN	NaN	NaN	NaN	NaN	NaN	NaN	NaN	NaN	NaN	NaN	NaN	NaN	NaN	NaN	NaN	NaN	NaN	NaN	NaN	NaN	NaN	NaN	NaN	NaN	NaN	NaN	NaN
P17661	Desmin	DES	33.6897	27.196	NaN	33.9852	25.4397	24.8674	26.3052	NaN	23.0839	NaN	23.7598	26.2915	26.3847	27.1987	26.3537	23.1296	27.1235	26.5588	28.9649	NaN	NaN	28.3339	24.1436	25.1572	26.4965	NaN	26.4947	24.3967	26.7119	26.2615	27.0102	25.416	25.7158	30.7141	24.0679	NaN	28.1358	28.0861	NaN	26.0851	23.7739	28.0745	NaN	25.5118	NaN	24.5018	26.1511
O00273	DNA fragmentation factor subunit alpha	DFFA	NaN	NaN	NaN	21.3953	NaN	NaN	NaN	NaN	NaN	NaN	NaN	NaN	NaN	NaN	NaN	NaN	NaN	NaN	NaN	NaN	NaN	NaN	NaN	NaN	NaN	NaN	NaN	NaN	NaN	NaN	NaN	NaN	NaN	NaN	NaN	NaN	NaN	NaN	NaN	NaN	NaN	NaN	NaN	NaN	NaN	NaN	NaN
Q9Y394	Dehydrogenase/reductase SDR family member 7	DHRS7	21.4256	NaN	NaN	NaN	NaN	NaN	NaN	NaN	NaN	NaN	NaN	NaN	NaN	NaN	NaN	NaN	NaN	NaN	NaN	NaN	NaN	NaN	NaN	NaN	NaN	NaN	NaN	NaN	NaN	NaN	NaN	NaN	NaN	NaN	NaN	NaN	NaN	NaN	NaN	NaN	NaN	NaN	NaN	NaN	NaN	NaN	NaN
O43143	Pre-mRNA-splicing factor ATP-dependent RNA helicase DHX15	DHX15	NaN	23.4016	NaN	NaN	NaN	NaN	NaN	NaN	NaN	NaN	NaN	NaN	NaN	NaN	NaN	NaN	NaN	NaN	NaN	NaN	NaN	NaN	NaN	NaN	NaN	NaN	NaN	NaN	NaN	NaN	NaN	NaN	NaN	NaN	NaN	NaN	NaN	NaN	NaN	NaN	NaN	NaN	NaN	NaN	NaN	NaN	NaN
Q08211	ATP-dependent RNA helicase A	DHX9	27.4429	28.8158	NaN	26.1874	NaN	26.7011	NaN	NaN	NaN	NaN	NaN	26.2421	NaN	NaN	NaN	NaN	NaN	NaN	NaN	NaN	NaN	27.7819	25.2893	NaN	NaN	NaN	NaN	NaN	NaN	NaN	NaN	NaN	27.2765	NaN	NaN	NaN	28.0549	NaN	NaN	NaN	NaN	NaN	NaN	NaN	NaN	NaN	NaN
Q9NR28	Diablo homolog, mitochondrial	DIABLO	NaN	NaN	NaN	NaN	NaN	NaN	NaN	NaN	NaN	NaN	NaN	NaN	NaN	NaN	NaN	NaN	NaN	NaN	NaN	NaN	NaN	NaN	NaN	NaN	NaN	NaN	NaN	NaN	NaN	NaN	NaN	NaN	NaN	NaN	NaN	NaN	NaN	NaN	NaN	NaN	NaN	NaN	NaN	NaN	NaN	NaN	NaN
O60610	Protein diaphanous homolog 1	DIAPH1	NaN	NaN	NaN	NaN	NaN	NaN	NaN	NaN	NaN	NaN	NaN	NaN	NaN	NaN	NaN	NaN	NaN	NaN	NaN	NaN	NaN	NaN	NaN	NaN	NaN	NaN	NaN	NaN	NaN	NaN	NaN	NaN	NaN	NaN	NaN	NaN	NaN	NaN	NaN	NaN	NaN	NaN	NaN	NaN	NaN	NaN	NaN
O94907	Dickkopf-related protein 1	DKK1	NaN	NaN	24.6433	NaN	NaN	NaN	25.9776	NaN	25.6027	25.5323	NaN	26.8983	26.6183	25.9536	25.9477	26.0914	NaN	NaN	NaN	27.8624	NaN	25.6365	25.44	NaN	NaN	NaN	26.746	26.103	NaN	NaN	NaN	26.8109	NaN	NaN	26.4636	NaN	25.4913	26.4667	NaN	NaN	NaN	NaN	NaN	26.9855	26.362	25.4353	NaN
Q9UBP4	Dickkopf-related protein 3	DKK3	25.5338	26.5356	28.2612	NaN	27.5487	26.9705	26.8134	27.0907	27.7212	28.0781	27.894	27.6604	26.7558	27.3888	24.4767	30.6419	29.9004	30.1875	29.0329	29.4073	30.1192	30.4226	26.1771	26.922	27.4132	27.4672	27.8388	27.9244	27.9969	28.1229	27.5494	27.8884	27.3899	NaN	27.6281	NaN	25.8215	28.5174	27.8026	28.8713	28.9921	28.4662	28.2127	28.6576	26.9223	24.2764	29.8655
P10515	Dihydrolipoyllysine-residue acetyltransferase component of pyruvate dehydrogenase complex, mitochondrial	DLAT	26.6144	25.3749	NaN	26.773	NaN	NaN	NaN	NaN	NaN	NaN	NaN	NaN	NaN	NaN	NaN	NaN	NaN	NaN	NaN	NaN	NaN	NaN	NaN	NaN	NaN	NaN	NaN	NaN	NaN	NaN	NaN	NaN	NaN	NaN	NaN	NaN	NaN	NaN	NaN	NaN	NaN	NaN	NaN	NaN	NaN	NaN	NaN
P09622	Dihydrolipoyl dehydrogenase, mitochondrial	DLD	25.922	25.2969	NaN	27.7234	NaN	NaN	NaN	NaN	NaN	26.5423	NaN	NaN	26.8633	NaN	25.3381	NaN	NaN	NaN	NaN	NaN	NaN	NaN	26.3898	NaN	NaN	26.4877	NaN	26.5193	NaN	NaN	NaN	NaN	NaN	NaN	NaN	NaN	NaN	NaN	NaN	NaN	NaN	NaN	NaN	NaN	NaN	NaN	NaN
Q12959	Disks large homolog 1	DLG1	NaN	NaN	NaN	NaN	NaN	NaN	NaN	NaN	NaN	NaN	NaN	NaN	NaN	NaN	NaN	NaN	NaN	NaN	NaN	NaN	NaN	NaN	21.6911	NaN	NaN	NaN	NaN	NaN	NaN	NaN	NaN	NaN	NaN	NaN	NaN	NaN	NaN	NaN	NaN	NaN	NaN	NaN	NaN	NaN	NaN	NaN	NaN
Q9Y2H0	Disks large-associated protein 4	DLGAP4	NaN	NaN	NaN	NaN	NaN	NaN	NaN	NaN	NaN	NaN	NaN	NaN	NaN	NaN	NaN	NaN	NaN	NaN	NaN	NaN	NaN	NaN	NaN	NaN	NaN	NaN	NaN	NaN	NaN	NaN	NaN	NaN	NaN	NaN	NaN	NaN	NaN	NaN	NaN	NaN	NaN	NaN	NaN	NaN	NaN	NaN	NaN
P36957	Dihydrolipoyllysine-residue succinyltransferase component of 2-oxoglutarate dehydrogenase complex, mitochondrial	DLST	27.9819	27.2756	NaN	28.8593	NaN	NaN	NaN	NaN	NaN	NaN	NaN	24.2457	24.2023	NaN	NaN	NaN	NaN	NaN	NaN	NaN	NaN	NaN	NaN	NaN	NaN	NaN	NaN	NaN	NaN	NaN	NaN	NaN	NaN	25.7242	NaN	NaN	26.1048	NaN	NaN	NaN	NaN	NaN	NaN	NaN	NaN	24.1402	NaN
P11532	Dystrophin	DMD	27.269	25.2933	NaN	28.3657	NaN	NaN	NaN	NaN	NaN	24.8983	23.4594	24.0899	24.4741	NaN	NaN	NaN	NaN	NaN	NaN	NaN	NaN	NaN	NaN	NaN	NaN	NaN	NaN	NaN	24.75	NaN	NaN	NaN	23.9881	NaN	NaN	NaN	NaN	NaN	NaN	NaN	NaN	NaN	NaN	24.8097	NaN	NaN	NaN
CON__A3EZ82;Q6E0U4	Dermokine	DMKN	NaN	NaN	NaN	NaN	20.4628	NaN	NaN	NaN	NaN	NaN	NaN	NaN	NaN	NaN	NaN	NaN	NaN	NaN	NaN	NaN	NaN	NaN	NaN	NaN	NaN	NaN	NaN	NaN	NaN	NaN	NaN	NaN	NaN	NaN	NaN	NaN	NaN	NaN	NaN	NaN	NaN	NaN	NaN	NaN	NaN	NaN	NaN
P31689	DnaJ homolog subfamily A member 1	DNAJA1	NaN	23.9585	NaN	24.8038	NaN	NaN	NaN	NaN	NaN	NaN	NaN	NaN	NaN	NaN	NaN	NaN	NaN	NaN	NaN	NaN	NaN	NaN	NaN	NaN	NaN	NaN	NaN	NaN	NaN	NaN	NaN	NaN	NaN	NaN	NaN	NaN	NaN	NaN	NaN	NaN	NaN	NaN	NaN	NaN	NaN	NaN	NaN
O60884	DnaJ homolog subfamily A member 2	DNAJA2	25.5101	24.9357	NaN	NaN	NaN	NaN	NaN	NaN	NaN	NaN	NaN	NaN	NaN	NaN	NaN	NaN	NaN	NaN	NaN	NaN	NaN	NaN	NaN	NaN	NaN	NaN	NaN	NaN	NaN	NaN	NaN	NaN	NaN	NaN	NaN	NaN	NaN	NaN	NaN	NaN	NaN	NaN	NaN	NaN	NaN	NaN	NaN
Q96EY1	DnaJ homolog subfamily A member 3, mitochondrial	DNAJA3	23.9145	NaN	NaN	NaN	NaN	NaN	NaN	NaN	NaN	NaN	NaN	NaN	NaN	NaN	NaN	NaN	NaN	NaN	NaN	NaN	NaN	NaN	NaN	NaN	NaN	NaN	NaN	NaN	NaN	NaN	NaN	NaN	NaN	NaN	NaN	NaN	NaN	NaN	NaN	NaN	NaN	NaN	NaN	NaN	NaN	NaN	NaN
Q8WW22	DnaJ homolog subfamily A member 4	DNAJA4	NaN	NaN	NaN	NaN	NaN	NaN	NaN	NaN	NaN	NaN	NaN	NaN	NaN	NaN	NaN	NaN	NaN	NaN	NaN	NaN	NaN	NaN	NaN	NaN	NaN	NaN	NaN	NaN	NaN	NaN	NaN	NaN	NaN	NaN	NaN	NaN	NaN	NaN	NaN	NaN	NaN	NaN	NaN	NaN	23.3707	NaN	NaN
P25685	DnaJ homolog subfamily B member 1	DNAJB1	NaN	NaN	NaN	NaN	NaN	NaN	NaN	NaN	NaN	NaN	NaN	25.4867	NaN	NaN	NaN	NaN	NaN	NaN	NaN	NaN	NaN	NaN	NaN	NaN	NaN	NaN	NaN	NaN	NaN	NaN	NaN	NaN	NaN	NaN	NaN	NaN	NaN	NaN	NaN	NaN	NaN	NaN	NaN	NaN	NaN	NaN	NaN
Q9UBS4	DnaJ homolog subfamily B member 11	DNAJB11	25.5707	26.1693	25.6167	25.7679	NaN	24.9017	NaN	25.3123	24.6797	24.7796	NaN	24.8126	NaN	25.3786	NaN	26.1938	25.8414	25.5235	NaN	NaN	NaN	25.4658	NaN	NaN	NaN	NaN	NaN	NaN	NaN	NaN	NaN	NaN	NaN	24.7378	NaN	NaN	NaN	25.6216	NaN	NaN	NaN	NaN	NaN	NaN	NaN	24.8143	NaN
Q9UDY4	DnaJ homolog subfamily B member 4	DNAJB4	24.9977	23.5321	NaN	26.0173	NaN	NaN	NaN	NaN	NaN	NaN	NaN	NaN	NaN	NaN	NaN	NaN	NaN	NaN	NaN	NaN	NaN	NaN	NaN	NaN	NaN	NaN	NaN	NaN	NaN	NaN	NaN	NaN	NaN	NaN	NaN	NaN	NaN	NaN	NaN	NaN	NaN	NaN	NaN	NaN	NaN	NaN	NaN
O75190;Q8WWF6;Q8NHS0;P25686	DnaJ homolog subfamily B member 6;DnaJ homolog subfamily B member 3;DnaJ homolog subfamily B member 8;DnaJ homolog subfamily B member 2	DNAJB6;DNAJB3;DNAJB8;DNAJB2	NaN	NaN	NaN	22.6239	NaN	NaN	NaN	NaN	NaN	NaN	NaN	NaN	NaN	NaN	NaN	NaN	NaN	NaN	NaN	NaN	NaN	NaN	NaN	NaN	NaN	NaN	NaN	NaN	NaN	NaN	NaN	NaN	NaN	NaN	NaN	NaN	NaN	NaN	NaN	NaN	NaN	NaN	NaN	NaN	NaN	NaN	NaN
Q9UBS3	DnaJ homolog subfamily B member 9	DNAJB9	NaN	NaN	NaN	NaN	NaN	NaN	NaN	NaN	NaN	NaN	NaN	NaN	NaN	NaN	NaN	NaN	NaN	NaN	NaN	NaN	NaN	NaN	NaN	NaN	NaN	NaN	NaN	NaN	24.1378	NaN	NaN	NaN	NaN	NaN	NaN	NaN	NaN	NaN	NaN	NaN	NaN	NaN	NaN	NaN	NaN	NaN	NaN
Q13217	DnaJ homolog subfamily C member 3	DNAJC3	27.0705	26.2577	27.918	25.6343	26.9825	27.6611	26.907	27.4358	27.2335	28.2283	27.5332	25.6896	26.1419	27.3314	28.0029	28.8146	28.431	28.8409	28.778	28.7902	28.8534	28.5103	27.8348	29.2258	27.7959	28.6683	28.3582	29.0287	27.1432	27.9547	27.7351	27.8364	27.6425	28.555	27.5243	NaN	27.402	28.4139	28.6167	27.885	28.4833	28.6455	28.0619	28.1124	29.351	28.5654	28.1606
Q99615	DnaJ homolog subfamily C member 7	DNAJC7	NaN	NaN	NaN	NaN	NaN	NaN	NaN	NaN	NaN	NaN	NaN	NaN	NaN	NaN	NaN	NaN	NaN	NaN	NaN	NaN	NaN	NaN	NaN	NaN	NaN	NaN	NaN	NaN	NaN	NaN	NaN	NaN	NaN	NaN	NaN	NaN	NaN	NaN	NaN	NaN	NaN	NaN	NaN	NaN	NaN	NaN	NaN
O75937	DnaJ homolog subfamily C member 8	DNAJC8	NaN	23.428	NaN	NaN	NaN	NaN	NaN	NaN	NaN	NaN	NaN	NaN	NaN	NaN	NaN	NaN	NaN	NaN	NaN	NaN	NaN	NaN	NaN	NaN	NaN	NaN	NaN	NaN	NaN	NaN	NaN	NaN	NaN	NaN	NaN	NaN	NaN	NaN	NaN	NaN	NaN	NaN	NaN	NaN	NaN	NaN	NaN
Q13609	Deoxyribonuclease gamma	DNASE1L3	NaN	NaN	NaN	NaN	NaN	NaN	NaN	23.269	NaN	NaN	NaN	24.1247	24.3922	26.8856	NaN	NaN	NaN	NaN	NaN	NaN	NaN	NaN	NaN	NaN	NaN	NaN	NaN	NaN	NaN	NaN	NaN	NaN	NaN	NaN	24.1858	NaN	NaN	NaN	NaN	NaN	NaN	NaN	NaN	NaN	NaN	25.5934	NaN
O00115	Deoxyribonuclease-2-alpha	DNASE2	22.6705	23.3842	NaN	NaN	NaN	NaN	NaN	NaN	NaN	NaN	NaN	NaN	NaN	NaN	NaN	NaN	NaN	NaN	NaN	NaN	NaN	NaN	NaN	NaN	NaN	NaN	NaN	NaN	NaN	NaN	NaN	NaN	NaN	NaN	NaN	NaN	NaN	NaN	NaN	NaN	NaN	NaN	NaN	NaN	NaN	NaN	NaN
Q05193	Dynamin-1	DNM1	NaN	24.2323	NaN	23.1474	NaN	NaN	NaN	NaN	NaN	NaN	NaN	NaN	NaN	NaN	NaN	NaN	NaN	NaN	NaN	NaN	NaN	NaN	NaN	NaN	NaN	NaN	NaN	NaN	NaN	NaN	NaN	NaN	NaN	NaN	NaN	NaN	NaN	NaN	NaN	NaN	NaN	NaN	NaN	NaN	NaN	NaN	NaN
O00429	Dynamin-1-like protein	DNM1L	NaN	24.763	NaN	23.6665	NaN	NaN	NaN	NaN	NaN	NaN	NaN	NaN	NaN	NaN	NaN	NaN	NaN	NaN	NaN	NaN	NaN	NaN	NaN	NaN	NaN	NaN	NaN	NaN	NaN	NaN	NaN	NaN	NaN	NaN	NaN	NaN	NaN	NaN	NaN	NaN	NaN	NaN	NaN	NaN	NaN	NaN	NaN
P50570	Dynamin-2	DNM2	26.1401	26.2204	NaN	26.2551	NaN	NaN	NaN	NaN	NaN	NaN	26.3274	NaN	NaN	NaN	NaN	NaN	NaN	NaN	NaN	NaN	NaN	NaN	NaN	NaN	NaN	27.3848	NaN	NaN	NaN	NaN	NaN	NaN	NaN	NaN	NaN	NaN	NaN	NaN	NaN	NaN	NaN	NaN	NaN	NaN	NaN	25.4303	NaN
Q9ULA0	Aspartyl aminopeptidase	DNPEP	23.6079	24.1389	NaN	24.0109	NaN	NaN	NaN	NaN	NaN	NaN	NaN	NaN	NaN	NaN	NaN	NaN	NaN	NaN	NaN	NaN	NaN	NaN	NaN	NaN	24.4172	NaN	NaN	NaN	NaN	NaN	NaN	NaN	NaN	NaN	NaN	NaN	NaN	NaN	NaN	NaN	NaN	NaN	NaN	NaN	NaN	NaN	NaN
O43598	2-deoxynucleoside 5-phosphate N-hydrolase 1	DNPH1	NaN	NaN	NaN	NaN	NaN	NaN	NaN	NaN	NaN	NaN	NaN	NaN	NaN	NaN	NaN	NaN	NaN	NaN	NaN	NaN	NaN	NaN	NaN	NaN	NaN	NaN	NaN	NaN	NaN	NaN	NaN	NaN	NaN	NaN	NaN	NaN	NaN	NaN	NaN	NaN	NaN	NaN	NaN	NaN	NaN	NaN	NaN
Q5JSL3	Dedicator of cytokinesis protein 11	DOCK11	NaN	NaN	NaN	NaN	NaN	NaN	NaN	NaN	NaN	NaN	NaN	NaN	NaN	NaN	NaN	NaN	NaN	NaN	NaN	NaN	NaN	NaN	NaN	NaN	NaN	NaN	NaN	NaN	NaN	NaN	NaN	NaN	NaN	NaN	NaN	NaN	NaN	NaN	NaN	NaN	NaN	NaN	NaN	NaN	NaN	NaN	NaN
Q9NY33	Dipeptidyl peptidase 3	DPP3	23.7494	24.1554	NaN	NaN	NaN	NaN	NaN	NaN	NaN	NaN	NaN	NaN	NaN	NaN	NaN	NaN	NaN	NaN	NaN	NaN	NaN	NaN	NaN	NaN	NaN	NaN	NaN	NaN	NaN	NaN	NaN	NaN	NaN	NaN	NaN	NaN	NaN	NaN	NaN	NaN	NaN	NaN	NaN	NaN	NaN	NaN	NaN
P27487	Dipeptidyl peptidase 4;Dipeptidyl peptidase 4 membrane form;Dipeptidyl peptidase 4 soluble form	DPP4	24.9926	25.7503	NaN	24.4251	NaN	NaN	NaN	NaN	NaN	NaN	NaN	NaN	NaN	NaN	NaN	28.8125	25.6933	27.8428	NaN	26.7027	26.6063	28.3144	26.0889	NaN	NaN	NaN	NaN	NaN	NaN	NaN	NaN	NaN	NaN	NaN	NaN	NaN	NaN	NaN	NaN	NaN	NaN	NaN	NaN	26.0701	NaN	24.8139	NaN
Q9UHL4	Dipeptidyl peptidase 2	DPP7	23.853	25.3364	24.8312	24.519	24.527	23.9664	NaN	NaN	23.941	NaN	NaN	NaN	25.1065	NaN	NaN	24.6857	NaN	23.6305	NaN	NaN	26.3159	25.3349	23.7186	NaN	24.3198	NaN	NaN	NaN	NaN	24.4426	NaN	NaN	NaN	NaN	NaN	NaN	NaN	NaN	26.082	24.0612	NaN	NaN	NaN	NaN	NaN	NaN	24.6812
Q07507	Dermatopontin	DPT	32.836	33.0492	29.9671	33.0611	30.6835	30.4882	30.9826	28.9158	29.3819	30.8745	29.9962	33.4471	33.2939	32.7447	32.7274	33.0291	32.7395	31.8873	32.384	32.4408	32.6351	31.0797	32.9307	32.0833	30.5122	32.1178	32.5401	32.482	31.5325	31.3045	29.8067	31.5619	29.6573	33.1109	33.2976	32.3594	33.3298	33.075	32.5125	31.8633	32.0252	32.9268	33.2302	30.327	32.8787	32.2558	32.3477
Q12882	Dihydropyrimidine dehydrogenase [NADP(+)]	DPYD	28.4203	28.5928	26.6885	29.7213	NaN	NaN	NaN	NaN	NaN	NaN	NaN	26.7158	NaN	NaN	NaN	NaN	26.7509	NaN	NaN	NaN	NaN	NaN	26.6012	NaN	NaN	NaN	NaN	NaN	NaN	NaN	NaN	NaN	NaN	NaN	NaN	NaN	NaN	NaN	NaN	NaN	NaN	NaN	27.891	NaN	27.2448	NaN	NaN
Q16555	Dihydropyrimidinase-related protein 2	DPYSL2	31.2684	31.3758	27.517	31.189	26.7572	22.9482	23.4425	24.2341	24.9824	24.6014	24.3258	25.0147	29.1326	27.8703	29.2007	27.9101	26.9411	27.8037	25.7893	25.8131	26.7135	28.48	30.4528	27.1486	28.2473	25.2211	24.7734	NaN	24.7114	NaN	24.2552	24.2526	23.5076	28.2271	28.9067	25.852	28.9754	26.5863	28.1815	24.314	27.0526	24.1555	NaN	26.4185	25.18	28.1646	23.3639
Q14195	Dihydropyrimidinase-related protein 3	DPYSL3	30.9962	31.4893	25.8644	30.9477	26.4453	22.6892	22.6796	23.0436	24.6713	24.2461	25.9313	26.9129	29.1035	28.0604	28.4333	26.7414	26.1791	26.2595	27.3703	22.8148	24.1879	27.184	30.7031	25.6056	24.8983	24.4368	24.932	NaN	22.1087	NaN	NaN	NaN	24.4925	29.2533	27.8416	NaN	28.4295	25.6924	NaN	NaN	21.5393	NaN	22.4078	NaN	NaN	27.2496	24.2872
Q01658	Protein Dr1	DR1	NaN	NaN	NaN	NaN	NaN	NaN	NaN	NaN	NaN	NaN	NaN	NaN	NaN	NaN	NaN	NaN	NaN	NaN	NaN	NaN	NaN	NaN	NaN	NaN	NaN	NaN	NaN	NaN	NaN	NaN	NaN	NaN	NaN	NaN	NaN	NaN	NaN	NaN	NaN	NaN	NaN	NaN	NaN	NaN	NaN	NaN	NaN
P55039	Developmentally-regulated GTP-binding protein 2	DRG2	NaN	NaN	NaN	NaN	NaN	NaN	NaN	NaN	NaN	NaN	NaN	NaN	NaN	NaN	NaN	NaN	NaN	NaN	NaN	NaN	NaN	NaN	NaN	NaN	NaN	NaN	NaN	NaN	NaN	NaN	NaN	NaN	NaN	NaN	NaN	NaN	NaN	NaN	NaN	NaN	NaN	NaN	NaN	NaN	NaN	NaN	NaN
Q08554	Desmocollin-1	DSC1	NaN	NaN	NaN	NaN	NaN	NaN	NaN	NaN	NaN	NaN	NaN	NaN	NaN	28.1252	NaN	NaN	NaN	NaN	NaN	NaN	NaN	NaN	NaN	NaN	NaN	NaN	NaN	NaN	NaN	NaN	NaN	NaN	NaN	NaN	NaN	NaN	NaN	NaN	NaN	NaN	NaN	NaN	NaN	NaN	NaN	NaN	NaN
Q14574	Desmocollin-3	DSC3	NaN	NaN	NaN	NaN	26.1115	26.5617	26.2364	NaN	25.9512	26.7279	26.129	27.1294	NaN	26.8401	27.4596	28.8251	28.1931	29.121	28.9568	28.4798	28.2943	28.6735	26.9025	26.4619	NaN	28.3122	26.6632	27.8119	26.2738	26.0719	NaN	26.4562	NaN	NaN	28.0862	NaN	NaN	28.3992	NaN	29.26	29.7484	27.2185	29.1119	28.3131	28.574	27.0799	NaN
O14972	Down syndrome critical region protein 3	DSCR3	NaN	22.3767	NaN	NaN	NaN	NaN	NaN	NaN	NaN	NaN	NaN	NaN	NaN	NaN	NaN	NaN	NaN	NaN	NaN	NaN	NaN	NaN	NaN	NaN	NaN	NaN	NaN	NaN	NaN	NaN	NaN	NaN	NaN	NaN	NaN	NaN	NaN	NaN	NaN	NaN	NaN	NaN	NaN	NaN	NaN	NaN	NaN
Q02413	Desmoglein-1	DSG1	NaN	NaN	NaN	NaN	NaN	NaN	NaN	NaN	NaN	NaN	NaN	NaN	NaN	30.7872	27.5153	NaN	NaN	NaN	NaN	NaN	NaN	NaN	NaN	NaN	NaN	NaN	NaN	NaN	NaN	NaN	NaN	NaN	NaN	NaN	NaN	NaN	NaN	NaN	NaN	NaN	NaN	NaN	NaN	NaN	NaN	NaN	NaN
Q14126	Desmoglein-2	DSG2	NaN	NaN	NaN	NaN	NaN	NaN	NaN	NaN	NaN	NaN	NaN	NaN	NaN	NaN	NaN	NaN	NaN	24.9534	NaN	NaN	NaN	NaN	NaN	NaN	NaN	NaN	NaN	NaN	NaN	NaN	NaN	NaN	NaN	NaN	NaN	NaN	NaN	NaN	NaN	NaN	NaN	NaN	NaN	NaN	NaN	NaN	NaN
P15924	Desmoplakin	DSP	NaN	NaN	NaN	28.8653	NaN	NaN	NaN	NaN	28.9667	NaN	NaN	NaN	NaN	30.8647	29.1109	NaN	32.1436	NaN	NaN	NaN	NaN	NaN	NaN	NaN	NaN	NaN	NaN	NaN	NaN	NaN	NaN	NaN	NaN	NaN	NaN	NaN	NaN	NaN	NaN	NaN	NaN	NaN	NaN	NaN	NaN	NaN	NaN
P60981	Destrin	DSTN	28.2443	29.1378	27.6164	28.6404	26.1534	26.5178	25.348	NaN	26.8755	26.5222	24.2319	27.9404	28.638	28.5997	28.6447	27.1118	27.2968	27.8859	27.4645	27.8919	28.092	28.5544	28.1594	26.5842	28.4509	27.8348	NaN	NaN	NaN	25.3343	26.4976	24.9199	NaN	28.1923	27.426	28.1771	29.1329	28.2977	27.9883	26.8249	27.8873	28.1477	27.4758	27.5228	27.3224	27.813	27.798
Q9BVJ7	Dual specificity protein phosphatase 23	DUSP23	21.8919	NaN	NaN	NaN	NaN	NaN	NaN	NaN	NaN	NaN	NaN	NaN	NaN	NaN	NaN	NaN	NaN	NaN	NaN	NaN	NaN	NaN	NaN	NaN	NaN	NaN	NaN	NaN	NaN	NaN	NaN	NaN	NaN	NaN	NaN	NaN	NaN	NaN	NaN	NaN	NaN	NaN	NaN	NaN	NaN	NaN	NaN
P51452	Dual specificity protein phosphatase 3	DUSP3	27.5464	24.0371	NaN	27.4184	NaN	NaN	NaN	NaN	NaN	NaN	24.0561	NaN	NaN	NaN	24.6894	NaN	NaN	NaN	NaN	NaN	NaN	NaN	NaN	NaN	NaN	NaN	NaN	NaN	NaN	NaN	NaN	NaN	NaN	NaN	NaN	NaN	NaN	NaN	NaN	NaN	NaN	NaN	NaN	NaN	NaN	NaN	NaN
P33316	Deoxyuridine 5-triphosphate nucleotidohydrolase, mitochondrial	DUT	23.359	NaN	NaN	24.6016	NaN	NaN	NaN	NaN	NaN	NaN	NaN	NaN	NaN	NaN	NaN	NaN	NaN	NaN	NaN	NaN	NaN	NaN	23.3596	NaN	NaN	NaN	NaN	NaN	NaN	NaN	NaN	NaN	NaN	NaN	NaN	NaN	NaN	NaN	NaN	NaN	NaN	NaN	NaN	NaN	NaN	NaN	NaN
Q14204	Cytoplasmic dynein 1 heavy chain 1	DYNC1H1	30.207	29.945	24.9114	27.6422	25.7859	23.4139	NaN	NaN	NaN	NaN	NaN	23.8514	25.1017	25.3804	25.3683	24.5149	NaN	NaN	NaN	NaN	24.3734	25.2256	27.4484	24.2642	26.1575	NaN	NaN	NaN	25.5267	NaN	25.1679	27.1799	24.1531	26.6302	27.8486	NaN	25.0796	24.886	25.7656	NaN	NaN	24.8663	NaN	27.0047	NaN	27.3838	25.5567
Q13409	Cytoplasmic dynein 1 intermediate chain 2	DYNC1I2	26.531	27.0916	NaN	26.1255	NaN	NaN	NaN	NaN	NaN	NaN	NaN	NaN	24.7195	NaN	NaN	NaN	NaN	NaN	NaN	NaN	NaN	NaN	26.1022	NaN	NaN	NaN	NaN	NaN	NaN	NaN	NaN	NaN	NaN	NaN	NaN	NaN	NaN	NaN	NaN	NaN	NaN	NaN	NaN	NaN	NaN	NaN	NaN
Q9Y6G9	Cytoplasmic dynein 1 light intermediate chain 1	DYNC1LI1	NaN	NaN	NaN	NaN	NaN	NaN	NaN	NaN	NaN	NaN	NaN	NaN	NaN	NaN	NaN	NaN	NaN	NaN	NaN	NaN	NaN	NaN	NaN	NaN	NaN	NaN	NaN	NaN	NaN	NaN	NaN	NaN	NaN	NaN	NaN	NaN	NaN	NaN	NaN	NaN	NaN	NaN	NaN	NaN	NaN	NaN	NaN
O43237	Cytoplasmic dynein 1 light intermediate chain 2	DYNC1LI2	NaN	23.3541	NaN	NaN	NaN	NaN	NaN	NaN	NaN	NaN	NaN	NaN	NaN	NaN	NaN	NaN	NaN	NaN	NaN	NaN	NaN	NaN	NaN	NaN	NaN	NaN	NaN	NaN	NaN	NaN	NaN	NaN	NaN	NaN	NaN	NaN	NaN	NaN	NaN	NaN	NaN	NaN	NaN	NaN	NaN	NaN	NaN
Q8NCM8	Cytoplasmic dynein 2 heavy chain 1	DYNC2H1	25.4886	26.1442	NaN	25.8575	NaN	NaN	NaN	NaN	NaN	NaN	NaN	25.3924	26.5956	NaN	NaN	25.3712	NaN	NaN	25.7872	NaN	26.4168	NaN	NaN	NaN	NaN	NaN	NaN	NaN	NaN	NaN	NaN	NaN	NaN	NaN	NaN	NaN	NaN	NaN	NaN	26.92	NaN	NaN	NaN	NaN	NaN	NaN	NaN
P63167	Dynein light chain 1, cytoplasmic	DYNLL1	NaN	25.4865	NaN	NaN	NaN	NaN	NaN	NaN	NaN	NaN	NaN	NaN	NaN	NaN	NaN	NaN	NaN	NaN	NaN	NaN	NaN	NaN	NaN	NaN	NaN	NaN	NaN	NaN	NaN	NaN	NaN	NaN	NaN	NaN	NaN	NaN	NaN	NaN	NaN	NaN	NaN	NaN	NaN	NaN	NaN	NaN	NaN
Q96FJ2	Dynein light chain 2, cytoplasmic	DYNLL2	NaN	NaN	NaN	NaN	NaN	NaN	NaN	NaN	NaN	NaN	NaN	NaN	NaN	NaN	NaN	NaN	NaN	NaN	NaN	NaN	NaN	NaN	NaN	NaN	NaN	NaN	NaN	NaN	NaN	NaN	NaN	NaN	NaN	NaN	NaN	NaN	NaN	NaN	NaN	NaN	NaN	NaN	NaN	NaN	NaN	NaN	NaN
Q9NP97;Q8TF09	Dynein light chain roadblock-type 1;Dynein light chain roadblock-type 2	DYNLRB1;DYNLRB2	26.217	26.1187	NaN	26.045	NaN	NaN	NaN	NaN	NaN	NaN	NaN	NaN	NaN	NaN	NaN	NaN	NaN	NaN	NaN	NaN	NaN	NaN	25.1095	NaN	NaN	25.0192	NaN	NaN	NaN	NaN	NaN	NaN	NaN	NaN	24.5802	NaN	NaN	NaN	NaN	NaN	NaN	NaN	NaN	NaN	NaN	NaN	NaN
P63172	Dynein light chain Tctex-type 1	DYNLT1	NaN	NaN	24.244	NaN	NaN	NaN	NaN	NaN	NaN	NaN	NaN	NaN	NaN	NaN	NaN	NaN	NaN	NaN	NaN	NaN	NaN	NaN	NaN	NaN	NaN	NaN	NaN	NaN	NaN	NaN	NaN	NaN	NaN	NaN	NaN	NaN	NaN	NaN	NaN	NaN	NaN	NaN	NaN	NaN	NaN	NaN	NaN
P51808	Dynein light chain Tctex-type 3	DYNLT3	NaN	NaN	NaN	NaN	NaN	NaN	NaN	NaN	NaN	NaN	NaN	NaN	22.0758	NaN	NaN	NaN	NaN	NaN	NaN	NaN	NaN	NaN	NaN	NaN	NaN	NaN	NaN	NaN	NaN	NaN	NaN	NaN	NaN	NaN	NaN	NaN	NaN	NaN	NaN	NaN	NaN	NaN	NaN	NaN	NaN	NaN	NaN
O75923	Dysferlin	DYSF	25.74	NaN	NaN	NaN	NaN	NaN	NaN	NaN	NaN	NaN	NaN	NaN	NaN	NaN	NaN	NaN	NaN	NaN	NaN	NaN	NaN	NaN	NaN	NaN	NaN	NaN	NaN	NaN	NaN	NaN	NaN	NaN	NaN	NaN	NaN	NaN	NaN	NaN	NaN	NaN	NaN	NaN	NaN	NaN	NaN	NaN	NaN
Q13011	Delta(3,5)-Delta(2,4)-dienoyl-CoA isomerase, mitochondrial	ECH1	25.807	24.8716	NaN	25.5283	NaN	NaN	NaN	NaN	NaN	NaN	NaN	NaN	NaN	NaN	NaN	NaN	NaN	NaN	NaN	NaN	NaN	NaN	NaN	NaN	NaN	NaN	NaN	NaN	24.2638	NaN	NaN	NaN	NaN	26.3394	NaN	NaN	NaN	NaN	NaN	NaN	NaN	NaN	NaN	NaN	NaN	NaN	NaN
Q9NTX5	Ethylmalonyl-CoA decarboxylase	ECHDC1	24.4678	23.7706	NaN	NaN	NaN	NaN	NaN	NaN	NaN	NaN	NaN	NaN	NaN	NaN	NaN	NaN	NaN	NaN	NaN	NaN	NaN	NaN	NaN	NaN	NaN	NaN	NaN	NaN	NaN	NaN	NaN	NaN	NaN	NaN	NaN	NaN	NaN	NaN	NaN	NaN	NaN	NaN	NaN	NaN	NaN	NaN	NaN
P30084	Enoyl-CoA hydratase, mitochondrial	ECHS1	26.843	26.2395	NaN	27.732	NaN	NaN	24.7023	NaN	NaN	NaN	24.6277	24.6679	NaN	NaN	NaN	25.588	NaN	NaN	NaN	NaN	NaN	25.1566	25.3201	NaN	NaN	NaN	26.8636	NaN	NaN	25.044	NaN	NaN	NaN	NaN	NaN	NaN	NaN	NaN	NaN	NaN	NaN	NaN	NaN	NaN	NaN	26.4564	NaN
P42126	Enoyl-CoA delta isomerase 1, mitochondrial	ECI1	24.1676	NaN	NaN	NaN	NaN	NaN	NaN	NaN	NaN	NaN	NaN	NaN	NaN	NaN	NaN	NaN	NaN	NaN	NaN	NaN	NaN	NaN	23.3351	NaN	NaN	NaN	NaN	NaN	NaN	NaN	NaN	NaN	NaN	NaN	NaN	NaN	NaN	NaN	NaN	NaN	NaN	NaN	NaN	NaN	NaN	NaN	NaN
O75521	Enoyl-CoA delta isomerase 2, mitochondrial	ECI2	23.9203	NaN	NaN	24.2871	NaN	NaN	NaN	NaN	NaN	NaN	NaN	NaN	NaN	NaN	NaN	NaN	NaN	NaN	NaN	NaN	NaN	NaN	NaN	NaN	NaN	NaN	NaN	NaN	NaN	NaN	NaN	NaN	NaN	NaN	NaN	NaN	NaN	NaN	NaN	NaN	NaN	NaN	NaN	NaN	NaN	NaN	NaN
Q16610	Extracellular matrix protein 1	ECM1	29.0681	30.3269	30.6643	28.8742	30.9318	30.7589	30.9484	31.2219	30.901	30.8495	31.3059	29.909	25.9961	24.4851	26.4099	27.927	27.2788	28.292	25.931	27.8847	28.0627	27.6684	29.2725	29.7074	29.5974	27.8772	30.412	30.0911	30.96	30.7462	30.7622	30.2584	31.4255	23.807	NaN	NaN	26.8566	26.7645	NaN	NaN	27.0112	27.7152	24.4174	26.9816	28.1623	29.007	30.2369
O94769	Extracellular matrix protein 2	ECM2	26.0771	26.1262	26.6213	24.8569	26.9951	26.8977	26.7344	26.1054	26.3768	27.6855	26.6621	26.8332	28.4096	28.7731	27.1358	28.5765	28.2991	27.5748	29.1058	27.5088	28.047	27.8829	27.4737	28.2891	26.1423	28.6557	28.5294	28.7497	27.4494	27.2273	26.3349	27.765	27.1128	26.9683	29.6081	27.5462	28.5599	29.1129	30.2795	29.5228	29.3917	28.716	29.3052	28.8042	28.5563	29.1018	27.7544
O60869	Endothelial differentiation-related factor 1	EDF1	NaN	NaN	NaN	NaN	NaN	NaN	NaN	NaN	NaN	NaN	NaN	NaN	NaN	NaN	NaN	NaN	NaN	NaN	NaN	NaN	NaN	NaN	NaN	NaN	NaN	NaN	NaN	NaN	NaN	NaN	NaN	NaN	NaN	NaN	NaN	NaN	NaN	NaN	NaN	NaN	NaN	NaN	NaN	NaN	NaN	NaN	NaN
O43854	EGF-like repeat and discoidin I-like domain-containing protein 3	EDIL3	27.585	27.3564	29.7199	27.0518	29.6105	30.3663	30.1452	30.452	29.6762	30.3943	29.9555	29.9244	30.1072	30.9604	29.6291	31.4373	31.6064	31.991	32.1426	32.0351	31.9454	32.3309	30.2103	31.3368	29.6665	30.9536	30.8203	30.8882	30.3419	30.9549	30.2188	31.0272	30.5243	29.4875	30.4234	30.95	29.7668	30.8894	31.6689	31.497	31.9353	31.6268	31.069	31.4391	31.7403	31.8887	31.1086
Q15075	Early endosome antigen 1	EEA1	29.8812	29.8429	26.3853	28.5718	NaN	26.1327	27.0999	27.1802	26.5972	26.5344	NaN	NaN	NaN	NaN	NaN	26.3768	NaN	28.4214	29.398	NaN	27.5093	NaN	27.1584	25.1387	NaN	NaN	NaN	NaN	NaN	NaN	NaN	NaN	26.7956	25.9656	26.031	31.5676	31.4585	NaN	NaN	NaN	30.5849	30.3169	NaN	28.973	NaN	NaN	NaN
P68104;Q5VTE0	Elongation factor 1-alpha 1;Putative elongation factor 1-alpha-like 3	EEF1A1;EEF1A1P5	30.773	30.9177	29.8662	30.5469	29.1091	28.8888	27.219	28.5243	27.3336	27.6493	27.1142	28.7688	30.053	30.5306	30.7309	29.7847	29.5071	29.9622	29.9814	30.2413	30.1158	30.3436	30.4579	29.2766	30.2076	29.3783	29.2316	29.1942	27.8491	28.3138	28.7691	27.8842	26.1399	30.1062	30.0052	30.6895	30.7771	29.0266	29.4054	30.0987	28.9094	29.7603	29.7095	29.1301	29.1237	29.837	30.0388
Q05639	Elongation factor 1-alpha 2	EEF1A2	28.9593	NaN	NaN	27.2921	NaN	NaN	NaN	NaN	NaN	NaN	NaN	NaN	25.9097	NaN	NaN	NaN	NaN	NaN	NaN	NaN	NaN	NaN	NaN	NaN	NaN	NaN	25.9665	NaN	NaN	NaN	NaN	NaN	NaN	NaN	NaN	NaN	NaN	NaN	NaN	NaN	NaN	NaN	NaN	NaN	NaN	NaN	NaN
P24534	Elongation factor 1-beta	EEF1B2	27.5899	28.2708	25.4726	28.8746	NaN	NaN	26.0573	25.3323	NaN	NaN	NaN	26.0203	25.8183	26.3042	26.1796	NaN	NaN	NaN	NaN	NaN	NaN	25.2163	26.6893	NaN	NaN	26.9835	NaN	NaN	NaN	NaN	25.0114	NaN	NaN	26.4718	26.3963	NaN	26.031	NaN	NaN	NaN	NaN	NaN	NaN	NaN	26.1034	26.0508	25.9255
P29692	Elongation factor 1-delta	EEF1D	29.6133	29.9919	26.9696	30.9421	26.721	26.2779	NaN	NaN	NaN	NaN	NaN	26.493	27.4742	28.6597	29.0732	NaN	NaN	26.8411	NaN	NaN	27.1836	NaN	28.9859	27.3055	NaN	27.8054	26.0212	NaN	NaN	NaN	26.9407	NaN	NaN	28.3873	NaN	28.4303	30.9894	NaN	27.7682	NaN	NaN	NaN	28.7609	28.2839	26.9082	27.6045	26.7403
O43324	Eukaryotic translation elongation factor 1 epsilon-1	EEF1E1	NaN	21.6664	NaN	NaN	NaN	NaN	NaN	NaN	NaN	NaN	NaN	NaN	NaN	NaN	NaN	NaN	NaN	NaN	NaN	NaN	NaN	NaN	NaN	NaN	NaN	NaN	NaN	NaN	NaN	NaN	NaN	NaN	NaN	NaN	NaN	NaN	NaN	NaN	NaN	NaN	NaN	NaN	NaN	NaN	NaN	NaN	NaN
P26641	Elongation factor 1-gamma	EEF1G	27.5943	29.0921	26.1123	27.2525	25.6382	26.0915	NaN	25.4342	NaN	NaN	NaN	27.1435	26.7953	28.5854	27.0929	26.9556	NaN	27.7281	NaN	NaN	27.0141	26.1117	27.5684	25.9505	27.1172	NaN	NaN	NaN	NaN	NaN	NaN	NaN	NaN	26.615	26.4859	29.59	29.0802	NaN	NaN	NaN	NaN	28.0799	27.7921	NaN	26.9316	26.5999	27.195
P13639	Elongation factor 2	EEF2	29.2804	30.2073	27.5886	28.9413	25.4452	26.3753	25.0763	25.5657	26.9919	25.5843	23.3898	26.7772	26.8657	27.7887	27.2286	27.5763	26.5906	27.2749	26.1009	26.1486	26.7246	27.0554	28.5539	26.9931	28.1073	26.486	26.0947	26.5241	24.902	24.9925	26.8088	NaN	25.6122	27.541	27.3969	NaN	26.8848	26.6855	26.9366	NaN	25.2294	25.9464	26.9226	NaN	26.933	27.2453	27.6699
Q12805	EGF-containing fibulin-like extracellular matrix protein 1	EFEMP1	29.6985	30.5466	31.2804	29.2807	30.3658	30.1368	30.1021	31.0394	30.3178	29.8885	30.8447	27.5474	26.5935	26.4686	26.5253	30.2037	29.0254	30.2817	29.0469	29.6132	30.0305	30.4689	28.8431	28.817	29.9073	28.9996	27.8774	26.8435	30.6071	29.9293	31.0833	29.0918	31.3312	27.2792	27.9363	NaN	27.0476	27.666	25.3661	28.4743	28.5891	28.5278	28.8449	28.738	27.0824	29.2039	30.4122
O95967	EGF-containing fibulin-like extracellular matrix protein 2	EFEMP2	26.6769	27.3586	28.6728	25.9515	27.5366	27.6873	27.353	28.7489	28.7215	27.7509	28.0807	27.9774	28.7178	28.2059	27.1779	29.0401	28.312	28.6318	28.9074	28.3013	28.9526	29.4591	27.5661	28.3174	29.1458	29.3431	28.9751	28.9646	27.5063	28.1675	26.6676	28.2038	27.9421	27.8471	28.7814	27.8727	28.3288	29.0345	28.5131	28.3627	28.7519	25.9476	29.2536	27.8159	29.5292	29.9924	28.9752
Q96C19	EF-hand domain-containing protein D2	EFHD2	24.7786	24.3767	NaN	25.2554	NaN	NaN	NaN	NaN	NaN	NaN	NaN	NaN	NaN	NaN	NaN	24.7573	NaN	NaN	NaN	NaN	NaN	NaN	24.146	23.9852	NaN	NaN	25.4236	NaN	NaN	NaN	NaN	NaN	NaN	NaN	NaN	NaN	NaN	NaN	NaN	NaN	NaN	NaN	NaN	27.0221	NaN	NaN	NaN
Q15029	116 kDa U5 small nuclear ribonucleoprotein component	EFTUD2	24.0885	23.8684	NaN	NaN	NaN	NaN	NaN	NaN	NaN	NaN	NaN	NaN	NaN	NaN	NaN	NaN	NaN	NaN	NaN	NaN	NaN	NaN	NaN	NaN	NaN	NaN	NaN	NaN	NaN	NaN	NaN	NaN	NaN	NaN	NaN	NaN	NaN	NaN	NaN	NaN	NaN	NaN	NaN	NaN	NaN	NaN	NaN
P00533	Epidermal growth factor receptor	EGFR	22.8775	NaN	NaN	NaN	NaN	NaN	NaN	NaN	NaN	NaN	NaN	NaN	NaN	NaN	NaN	NaN	NaN	NaN	NaN	NaN	NaN	NaN	NaN	NaN	NaN	NaN	NaN	NaN	NaN	NaN	NaN	NaN	NaN	NaN	NaN	NaN	NaN	NaN	NaN	NaN	NaN	NaN	NaN	NaN	NaN	NaN	NaN
Q8N3D4	EH domain-binding protein 1-like protein 1	EHBP1L1	22.7112	NaN	NaN	NaN	NaN	NaN	NaN	NaN	NaN	NaN	NaN	NaN	NaN	NaN	NaN	NaN	NaN	NaN	NaN	NaN	NaN	NaN	NaN	NaN	NaN	NaN	NaN	NaN	NaN	NaN	NaN	NaN	NaN	NaN	NaN	NaN	NaN	NaN	NaN	NaN	NaN	NaN	NaN	NaN	NaN	NaN	NaN
Q9H4M9	EH domain-containing protein 1	EHD1	25.4152	26.5362	NaN	26.1377	NaN	NaN	NaN	NaN	NaN	NaN	NaN	NaN	25.6597	NaN	NaN	NaN	NaN	NaN	NaN	NaN	NaN	NaN	NaN	NaN	NaN	NaN	NaN	NaN	NaN	NaN	NaN	NaN	NaN	26.1355	NaN	NaN	NaN	NaN	NaN	NaN	NaN	NaN	NaN	NaN	NaN	NaN	NaN
Q9NZN4	EH domain-containing protein 2	EHD2	30.0137	30.1496	26.4709	30.0552	28.7864	26.119	25.4583	27.4336	26.4541	24.9288	24.3884	27.5063	30.1226	29.5294	30.1852	29.5148	28.6391	29.5719	28.3964	29.2006	29.3911	29.5519	29.1664	27.6461	27.865	25.5476	26.0429	25.1734	NaN	NaN	24.8923	NaN	22.9481	30.6139	29.5271	28.7563	30.0744	28.6294	28.452	27.8498	27.5243	26.7745	28.4619	28.6079	27.3801	28.5847	27.418
Q9NZN3	EH domain-containing protein 3	EHD3	23.1985	NaN	NaN	NaN	NaN	NaN	NaN	NaN	NaN	NaN	NaN	NaN	NaN	NaN	NaN	NaN	NaN	NaN	NaN	24.3147	NaN	NaN	NaN	NaN	NaN	NaN	NaN	NaN	NaN	NaN	NaN	NaN	NaN	NaN	NaN	NaN	NaN	NaN	NaN	NaN	NaN	NaN	NaN	NaN	NaN	NaN	NaN
Q9H223	EH domain-containing protein 4	EHD4	27.3608	27.3094	24.9372	27.1499	NaN	NaN	NaN	NaN	26.3519	NaN	NaN	NaN	26.3926	26.2645	NaN	26.552	25.9559	27.1607	NaN	27.888	26.2629	27.8604	25.4941	26.4735	26.9513	NaN	NaN	NaN	NaN	NaN	NaN	NaN	NaN	27.3019	NaN	29.5548	29.3462	27.0293	NaN	26.8802	NaN	28.1177	27.7148	27.5058	NaN	NaN	26.6558
P41567;O60739	Eukaryotic translation initiation factor 1;Eukaryotic translation initiation factor 1b	EIF1;EIF1B	NaN	25.1782	NaN	25.0672	NaN	NaN	NaN	NaN	NaN	NaN	NaN	NaN	NaN	NaN	NaN	NaN	NaN	NaN	NaN	NaN	NaN	NaN	25.2197	NaN	NaN	NaN	NaN	NaN	NaN	NaN	NaN	NaN	NaN	NaN	NaN	NaN	NaN	NaN	NaN	NaN	NaN	NaN	NaN	NaN	NaN	NaN	NaN
Q14232	Translation initiation factor eIF-2B subunit alpha	EIF2B1	NaN	NaN	NaN	NaN	NaN	NaN	NaN	NaN	NaN	NaN	NaN	NaN	NaN	NaN	NaN	NaN	NaN	NaN	NaN	NaN	NaN	NaN	NaN	NaN	NaN	NaN	NaN	NaN	NaN	NaN	NaN	NaN	NaN	NaN	NaN	NaN	NaN	NaN	NaN	NaN	NaN	NaN	NaN	NaN	NaN	NaN	NaN
P05198	Eukaryotic translation initiation factor 2 subunit 1	EIF2S1	27.3119	27.9145	NaN	28.2942	23.4015	23.9796	NaN	NaN	NaN	23.2992	NaN	23.4613	24.3907	25.732	23.9583	23.2519	NaN	NaN	NaN	NaN	NaN	24.103	24.9922	NaN	NaN	NaN	NaN	NaN	NaN	NaN	NaN	NaN	NaN	NaN	NaN	NaN	23.2012	NaN	NaN	NaN	NaN	NaN	NaN	NaN	NaN	NaN	NaN
P20042	Eukaryotic translation initiation factor 2 subunit 2	EIF2S2	25.4538	26.1227	NaN	25.9869	NaN	NaN	NaN	NaN	NaN	NaN	NaN	24.9488	25.192	NaN	NaN	NaN	NaN	NaN	NaN	NaN	NaN	NaN	25.502	NaN	NaN	NaN	NaN	NaN	NaN	NaN	NaN	NaN	NaN	25.7565	NaN	NaN	NaN	NaN	NaN	NaN	NaN	NaN	NaN	NaN	NaN	NaN	NaN
P41091	Eukaryotic translation initiation factor 2 subunit 3	EIF2S3	25.0867	26.2373	NaN	25.8927	NaN	NaN	NaN	NaN	NaN	NaN	NaN	NaN	NaN	NaN	NaN	NaN	NaN	NaN	NaN	NaN	NaN	NaN	25.6011	NaN	NaN	NaN	NaN	NaN	NaN	NaN	NaN	NaN	NaN	NaN	NaN	NaN	NaN	NaN	NaN	NaN	NaN	NaN	NaN	NaN	NaN	NaN	NaN
Q14152	Eukaryotic translation initiation factor 3 subunit A	EIF3A	24.1234	25.1874	NaN	23.0132	NaN	NaN	NaN	NaN	NaN	NaN	NaN	NaN	NaN	NaN	NaN	NaN	NaN	NaN	NaN	NaN	NaN	NaN	NaN	NaN	NaN	NaN	NaN	NaN	NaN	NaN	NaN	NaN	NaN	NaN	NaN	NaN	NaN	NaN	NaN	NaN	NaN	NaN	NaN	NaN	NaN	NaN	NaN
P55884	Eukaryotic translation initiation factor 3 subunit B	EIF3B	26.0569	26.5223	NaN	25.5382	NaN	NaN	NaN	NaN	NaN	NaN	NaN	NaN	NaN	NaN	NaN	NaN	NaN	NaN	NaN	NaN	NaN	NaN	24.733	24.9232	NaN	NaN	NaN	NaN	NaN	NaN	NaN	NaN	NaN	NaN	NaN	NaN	NaN	NaN	NaN	NaN	NaN	NaN	NaN	NaN	25.0835	NaN	NaN
Q99613;B5ME19	Eukaryotic translation initiation factor 3 subunit C;Eukaryotic translation initiation factor 3 subunit C-like protein	EIF3C;EIF3CL	23.2663	NaN	NaN	NaN	NaN	NaN	NaN	NaN	NaN	NaN	NaN	NaN	NaN	NaN	NaN	NaN	NaN	NaN	NaN	NaN	NaN	NaN	23.969	NaN	NaN	NaN	NaN	NaN	NaN	NaN	NaN	NaN	NaN	NaN	NaN	NaN	NaN	NaN	NaN	NaN	NaN	NaN	NaN	NaN	NaN	NaN	NaN
O15371	Eukaryotic translation initiation factor 3 subunit D	EIF3D	NaN	25.0026	NaN	25.7768	NaN	NaN	NaN	NaN	NaN	NaN	NaN	NaN	NaN	NaN	NaN	NaN	NaN	NaN	NaN	NaN	NaN	NaN	NaN	NaN	NaN	NaN	NaN	NaN	NaN	NaN	NaN	NaN	NaN	NaN	NaN	NaN	NaN	NaN	NaN	NaN	NaN	NaN	NaN	NaN	NaN	NaN	NaN
P60228	Eukaryotic translation initiation factor 3 subunit E	EIF3E	23.7505	23.8207	NaN	NaN	NaN	NaN	NaN	NaN	NaN	NaN	NaN	NaN	NaN	NaN	NaN	NaN	NaN	NaN	NaN	NaN	NaN	NaN	NaN	NaN	NaN	NaN	NaN	NaN	NaN	NaN	NaN	NaN	NaN	NaN	NaN	NaN	NaN	NaN	NaN	NaN	NaN	NaN	NaN	NaN	NaN	NaN	NaN
O00303	Eukaryotic translation initiation factor 3 subunit F	EIF3F	NaN	NaN	NaN	NaN	NaN	NaN	NaN	NaN	NaN	NaN	NaN	NaN	NaN	NaN	NaN	NaN	NaN	NaN	NaN	NaN	NaN	NaN	22.7484	NaN	NaN	NaN	NaN	NaN	NaN	NaN	NaN	NaN	NaN	NaN	NaN	NaN	NaN	NaN	NaN	NaN	NaN	NaN	NaN	NaN	NaN	NaN	NaN
O75821	Eukaryotic translation initiation factor 3 subunit G	EIF3G	25.0164	24.4957	NaN	NaN	NaN	NaN	NaN	NaN	NaN	NaN	NaN	NaN	NaN	NaN	NaN	NaN	NaN	NaN	NaN	NaN	NaN	NaN	NaN	NaN	NaN	NaN	NaN	NaN	NaN	NaN	NaN	NaN	NaN	NaN	NaN	NaN	NaN	NaN	NaN	NaN	NaN	NaN	NaN	NaN	NaN	NaN	NaN
O15372	Eukaryotic translation initiation factor 3 subunit H	EIF3H	NaN	24.4379	NaN	NaN	NaN	NaN	NaN	NaN	NaN	NaN	NaN	NaN	NaN	NaN	NaN	NaN	NaN	NaN	NaN	NaN	NaN	NaN	NaN	NaN	NaN	NaN	NaN	NaN	NaN	NaN	NaN	NaN	NaN	NaN	NaN	NaN	NaN	NaN	NaN	NaN	NaN	NaN	NaN	NaN	NaN	NaN	NaN
Q13347	Eukaryotic translation initiation factor 3 subunit I	EIF3I	24.2588	24.5786	NaN	24.784	NaN	NaN	NaN	NaN	NaN	NaN	NaN	NaN	NaN	NaN	NaN	NaN	NaN	NaN	NaN	NaN	NaN	NaN	NaN	NaN	NaN	NaN	NaN	NaN	NaN	NaN	NaN	NaN	NaN	NaN	NaN	NaN	NaN	NaN	NaN	NaN	NaN	NaN	NaN	NaN	NaN	NaN	NaN
O75822	Eukaryotic translation initiation factor 3 subunit J	EIF3J	24.7673	25.2713	NaN	25.1509	NaN	NaN	NaN	NaN	NaN	NaN	NaN	NaN	NaN	NaN	NaN	NaN	NaN	NaN	NaN	NaN	NaN	NaN	NaN	NaN	NaN	NaN	NaN	NaN	NaN	NaN	NaN	NaN	NaN	25.1487	NaN	NaN	NaN	NaN	NaN	NaN	NaN	NaN	NaN	NaN	NaN	NaN	NaN
Q9UBQ5	Eukaryotic translation initiation factor 3 subunit K	EIF3K	NaN	NaN	NaN	23.4977	NaN	NaN	NaN	NaN	NaN	NaN	NaN	NaN	NaN	NaN	NaN	NaN	NaN	NaN	NaN	NaN	NaN	NaN	NaN	NaN	NaN	NaN	NaN	NaN	NaN	NaN	NaN	NaN	NaN	NaN	NaN	NaN	NaN	NaN	NaN	NaN	NaN	NaN	NaN	NaN	NaN	NaN	NaN
Q9Y262	Eukaryotic translation initiation factor 3 subunit L	EIF3L	NaN	24.4524	NaN	NaN	NaN	NaN	NaN	NaN	NaN	NaN	NaN	NaN	NaN	NaN	NaN	NaN	NaN	NaN	NaN	NaN	NaN	NaN	NaN	NaN	NaN	NaN	NaN	NaN	NaN	NaN	NaN	NaN	NaN	NaN	NaN	NaN	NaN	NaN	NaN	NaN	NaN	NaN	NaN	NaN	NaN	23.3617	NaN
Q7L2H7	Eukaryotic translation initiation factor 3 subunit M	EIF3M	24.4288	24.7452	NaN	NaN	NaN	NaN	NaN	NaN	NaN	NaN	NaN	NaN	NaN	NaN	NaN	NaN	NaN	NaN	NaN	NaN	NaN	NaN	NaN	NaN	NaN	NaN	NaN	NaN	NaN	NaN	NaN	NaN	NaN	NaN	NaN	NaN	NaN	NaN	NaN	NaN	NaN	NaN	NaN	NaN	NaN	NaN	NaN
P60842	Eukaryotic initiation factor 4A-I	EIF4A1	26.9191	27.2008	25.7582	26.2114	23.4927	23.8953	NaN	NaN	NaN	NaN	NaN	25.6361	25.4385	26.1575	24.8589	24.7418	24.717	24.6098	NaN	NaN	NaN	NaN	25.1343	NaN	25.7986	NaN	23.9626	NaN	NaN	NaN	NaN	NaN	NaN	26.017	NaN	24.9886	NaN	24.7288	NaN	NaN	NaN	NaN	NaN	NaN	23.6476	25.5682	NaN
Q14240	Eukaryotic initiation factor 4A-II;Eukaryotic initiation factor 4A-II, N-terminally processed	EIF4A2	NaN	24.458	NaN	NaN	NaN	NaN	NaN	NaN	NaN	NaN	NaN	NaN	NaN	NaN	NaN	NaN	NaN	NaN	NaN	NaN	NaN	25.9405	24.9627	NaN	NaN	NaN	NaN	NaN	NaN	NaN	NaN	NaN	NaN	NaN	25.5164	NaN	NaN	NaN	NaN	NaN	NaN	NaN	NaN	NaN	NaN	NaN	NaN
P38919	Eukaryotic initiation factor 4A-III;Eukaryotic initiation factor 4A-III, N-terminally processed	EIF4A3	23.4928	24.374	24.1308	24.8662	NaN	NaN	NaN	NaN	NaN	NaN	NaN	NaN	NaN	NaN	NaN	NaN	NaN	NaN	NaN	NaN	NaN	NaN	NaN	NaN	NaN	NaN	NaN	NaN	NaN	NaN	NaN	NaN	NaN	NaN	NaN	NaN	NaN	NaN	NaN	NaN	NaN	NaN	NaN	NaN	NaN	NaN	NaN
P23588	Eukaryotic translation initiation factor 4B	EIF4B	NaN	NaN	NaN	NaN	NaN	NaN	NaN	NaN	NaN	NaN	NaN	NaN	NaN	NaN	NaN	NaN	NaN	22.7925	NaN	NaN	NaN	NaN	NaN	NaN	NaN	NaN	NaN	NaN	NaN	NaN	NaN	NaN	NaN	NaN	NaN	NaN	NaN	NaN	NaN	NaN	NaN	NaN	NaN	NaN	NaN	NaN	NaN
P06730	Eukaryotic translation initiation factor 4E	EIF4E	25.2446	24.8313	NaN	23.7147	NaN	NaN	NaN	NaN	NaN	NaN	NaN	NaN	NaN	NaN	NaN	NaN	NaN	NaN	NaN	NaN	NaN	NaN	NaN	NaN	NaN	NaN	NaN	NaN	NaN	NaN	NaN	NaN	NaN	NaN	NaN	NaN	NaN	NaN	NaN	NaN	NaN	NaN	NaN	NaN	NaN	NaN	NaN
O60573	Eukaryotic translation initiation factor 4E type 2	EIF4E2	NaN	20.9797	NaN	NaN	NaN	NaN	NaN	NaN	NaN	NaN	NaN	NaN	NaN	NaN	NaN	NaN	NaN	NaN	NaN	NaN	NaN	NaN	NaN	NaN	NaN	NaN	NaN	NaN	NaN	NaN	NaN	NaN	NaN	NaN	NaN	NaN	NaN	NaN	NaN	NaN	NaN	NaN	NaN	NaN	NaN	NaN	NaN
Q04637	Eukaryotic translation initiation factor 4 gamma 1	EIF4G1	23.3712	24.8604	NaN	NaN	NaN	NaN	NaN	NaN	NaN	NaN	NaN	NaN	NaN	NaN	NaN	NaN	NaN	NaN	NaN	NaN	NaN	NaN	NaN	NaN	NaN	NaN	26.2781	NaN	26.0051	NaN	NaN	NaN	NaN	NaN	NaN	NaN	NaN	NaN	NaN	NaN	NaN	NaN	NaN	NaN	NaN	NaN	NaN
P78344	Eukaryotic translation initiation factor 4 gamma 2	EIF4G2	NaN	22.2254	NaN	NaN	NaN	NaN	NaN	NaN	NaN	NaN	NaN	NaN	NaN	NaN	NaN	NaN	NaN	NaN	NaN	NaN	NaN	NaN	NaN	NaN	NaN	NaN	NaN	NaN	NaN	NaN	NaN	NaN	NaN	NaN	NaN	NaN	NaN	NaN	NaN	NaN	NaN	NaN	NaN	NaN	NaN	NaN	NaN
Q15056	Eukaryotic translation initiation factor 4H	EIF4H	25.912	26.0136	NaN	27.5043	26.7056	NaN	NaN	NaN	NaN	NaN	NaN	27.2364	27.8848	NaN	NaN	NaN	NaN	28.6595	NaN	NaN	NaN	27.9912	25.9322	NaN	NaN	NaN	NaN	NaN	NaN	NaN	NaN	NaN	NaN	26.5828	NaN	NaN	NaN	NaN	NaN	NaN	NaN	NaN	NaN	NaN	NaN	NaN	NaN
P55010	Eukaryotic translation initiation factor 5	EIF5	26.1476	26.526	NaN	25.6547	NaN	NaN	NaN	NaN	NaN	NaN	NaN	NaN	NaN	NaN	NaN	NaN	NaN	NaN	NaN	NaN	NaN	NaN	NaN	NaN	NaN	NaN	NaN	NaN	NaN	NaN	NaN	NaN	NaN	NaN	NaN	NaN	NaN	NaN	NaN	27.1762	NaN	NaN	NaN	NaN	NaN	NaN	NaN
P63241;Q6IS14	Eukaryotic translation initiation factor 5A-1;Eukaryotic translation initiation factor 5A-1-like	EIF5A;EIF5AL1	28.4124	28.1153	25.1379	27.7419	NaN	24.3322	NaN	NaN	NaN	NaN	NaN	23.3639	26.6955	25.1088	27.1014	NaN	NaN	NaN	NaN	NaN	NaN	NaN	27.5546	25.4576	NaN	NaN	24.7891	NaN	23.9586	NaN	25.0137	NaN	NaN	26.1344	26.0253	NaN	26.9013	NaN	26.1993	25.1685	NaN	24.7224	NaN	NaN	25.6145	NaN	26.2037
O60841	Eukaryotic translation initiation factor 5B	EIF5B	22.2185	23.0744	NaN	NaN	NaN	NaN	NaN	NaN	NaN	NaN	NaN	NaN	NaN	NaN	NaN	NaN	NaN	NaN	NaN	NaN	NaN	NaN	NaN	NaN	NaN	NaN	NaN	NaN	NaN	NaN	NaN	NaN	NaN	NaN	NaN	NaN	NaN	NaN	NaN	NaN	NaN	NaN	NaN	NaN	NaN	NaN	NaN
P56537	Eukaryotic translation initiation factor 6	EIF6	26.1558	26.2269	NaN	26.1267	NaN	NaN	NaN	NaN	NaN	NaN	NaN	NaN	NaN	NaN	NaN	NaN	NaN	NaN	NaN	NaN	NaN	NaN	NaN	NaN	NaN	NaN	NaN	NaN	NaN	NaN	NaN	NaN	NaN	NaN	NaN	NaN	NaN	NaN	NaN	NaN	NaN	NaN	NaN	NaN	NaN	NaN	NaN
P08246	Neutrophil elastase	ELANE	NaN	NaN	NaN	NaN	NaN	NaN	NaN	NaN	NaN	NaN	NaN	NaN	NaN	NaN	NaN	NaN	NaN	NaN	NaN	NaN	NaN	NaN	NaN	NaN	NaN	NaN	NaN	NaN	NaN	NaN	NaN	NaN	NaN	NaN	NaN	NaN	NaN	NaN	NaN	NaN	NaN	NaN	NaN	NaN	NaN	NaN	NaN
Q15717	ELAV-like protein 1	ELAVL1	24.6018	24.9221	NaN	25.8292	NaN	NaN	NaN	NaN	NaN	NaN	NaN	NaN	24.6667	NaN	NaN	NaN	NaN	NaN	NaN	NaN	NaN	NaN	NaN	NaN	NaN	NaN	NaN	NaN	NaN	NaN	NaN	NaN	NaN	NaN	NaN	NaN	NaN	NaN	NaN	NaN	NaN	NaN	NaN	NaN	NaN	NaN	NaN
P15502	Elastin	ELN	NaN	NaN	NaN	NaN	NaN	NaN	NaN	NaN	NaN	NaN	NaN	NaN	NaN	NaN	NaN	NaN	NaN	NaN	NaN	NaN	NaN	NaN	NaN	NaN	NaN	NaN	NaN	NaN	NaN	NaN	NaN	NaN	NaN	NaN	NaN	NaN	NaN	NaN	NaN	NaN	NaN	NaN	NaN	NaN	NaN	NaN	NaN
Q9NPA0	ER membrane protein complex subunit 7	EMC7	NaN	NaN	NaN	NaN	NaN	NaN	NaN	NaN	NaN	NaN	NaN	NaN	NaN	NaN	NaN	NaN	NaN	NaN	NaN	NaN	NaN	NaN	NaN	NaN	24.2654	NaN	NaN	NaN	NaN	NaN	NaN	NaN	NaN	NaN	NaN	NaN	NaN	NaN	NaN	NaN	NaN	NaN	NaN	NaN	NaN	NaN	NaN
P50402	Emerin	EMD	NaN	NaN	NaN	NaN	NaN	NaN	NaN	NaN	NaN	NaN	NaN	NaN	NaN	NaN	NaN	NaN	NaN	NaN	NaN	NaN	NaN	NaN	NaN	NaN	NaN	NaN	NaN	NaN	NaN	NaN	NaN	NaN	NaN	NaN	NaN	NaN	NaN	NaN	NaN	NaN	NaN	NaN	NaN	NaN	NaN	NaN	NaN
Q9Y6C2	EMILIN-1	EMILIN1	29.411	29.3115	28.97	29.2486	29.1923	29.0569	29.2821	29.4293	29.4552	29.5571	28.9609	29.6426	29.8451	30.1153	30.3476	30.6596	30.8246	30.7881	31.4344	30.536	30.7015	31.4639	29.587	30.1688	29.5745	30.6343	30.4536	30.6032	29.1618	29.9655	28.7665	30.033	29.6261	29.874	30.2412	30.8473	30.3933	30.6767	30.9078	31.632	31.1848	31.1128	31.3322	30.3958	30.364	30.4214	30.1488
Q9BXX0	EMILIN-2	EMILIN2	24.791	24.3002	25.5015	NaN	NaN	NaN	NaN	NaN	NaN	NaN	NaN	NaN	NaN	NaN	NaN	NaN	NaN	NaN	NaN	NaN	NaN	NaN	NaN	NaN	NaN	NaN	NaN	NaN	NaN	NaN	NaN	NaN	NaN	NaN	NaN	NaN	NaN	NaN	NaN	NaN	NaN	NaN	NaN	NaN	NaN	NaN	NaN
Q9NT22	EMILIN-3	EMILIN3	26.0211	24.9453	25.1168	24.9681	28.2911	27.3681	26.6974	NaN	25.6468	23.7281	NaN	29.4695	29.217	30.7247	29.7754	29.9691	30.9096	30.2429	30.7371	30.181	30.2232	29.8007	28.9741	28.9339	27.2365	30.9729	29.1844	29.7467	24.378	26.5766	NaN	28.7527	NaN	29.1677	30.2193	30.2397	29.5731	30.7264	31.1769	30.4164	31.0353	30.5826	30.7573	30.3335	29.9864	29.881	24.526
O00423	Echinoderm microtubule-associated protein-like 1	EML1	23.6618	24.6112	NaN	23.721	NaN	NaN	NaN	NaN	NaN	NaN	NaN	NaN	NaN	NaN	NaN	NaN	NaN	NaN	NaN	NaN	NaN	NaN	NaN	NaN	NaN	NaN	NaN	NaN	NaN	NaN	NaN	NaN	NaN	NaN	NaN	NaN	NaN	NaN	NaN	NaN	NaN	NaN	NaN	NaN	NaN	NaN	NaN
O95834	Echinoderm microtubule-associated protein-like 2	EML2	23.8714	24.0537	NaN	24.7327	NaN	NaN	NaN	NaN	NaN	NaN	NaN	NaN	NaN	NaN	NaN	NaN	NaN	NaN	NaN	NaN	NaN	NaN	NaN	NaN	NaN	NaN	NaN	NaN	NaN	NaN	NaN	NaN	NaN	NaN	NaN	NaN	NaN	NaN	NaN	NaN	NaN	NaN	NaN	NaN	NaN	NaN	NaN
Q32P44	Echinoderm microtubule-associated protein-like 3	EML3	NaN	NaN	NaN	NaN	NaN	NaN	NaN	NaN	NaN	24.5707	NaN	NaN	NaN	NaN	NaN	NaN	NaN	NaN	NaN	NaN	NaN	NaN	NaN	NaN	NaN	NaN	NaN	NaN	NaN	NaN	NaN	NaN	NaN	NaN	NaN	NaN	NaN	NaN	NaN	NaN	NaN	NaN	NaN	NaN	NaN	NaN	NaN
Q9HC35	Echinoderm microtubule-associated protein-like 4	EML4	NaN	NaN	NaN	21.5031	NaN	NaN	NaN	NaN	NaN	NaN	NaN	NaN	NaN	NaN	NaN	NaN	NaN	NaN	NaN	NaN	NaN	NaN	NaN	NaN	NaN	NaN	NaN	NaN	NaN	NaN	NaN	NaN	NaN	NaN	NaN	NaN	NaN	NaN	NaN	NaN	NaN	NaN	NaN	NaN	NaN	NaN	NaN
Q8N8S7	Protein enabled homolog	ENAH	24.4297	24.927	NaN	24.2254	23.3885	NaN	NaN	NaN	NaN	24.4026	NaN	NaN	NaN	NaN	NaN	NaN	NaN	NaN	NaN	NaN	NaN	NaN	24.5117	NaN	NaN	NaN	NaN	NaN	NaN	NaN	NaN	NaN	NaN	NaN	NaN	NaN	NaN	NaN	NaN	NaN	NaN	NaN	NaN	NaN	NaN	NaN	NaN
O94919	Endonuclease domain-containing 1 protein	ENDOD1	25.1742	24.7686	NaN	25.806	NaN	24.4078	NaN	NaN	NaN	NaN	NaN	NaN	NaN	NaN	NaN	NaN	NaN	NaN	25.3831	NaN	NaN	NaN	NaN	NaN	NaN	NaN	NaN	NaN	NaN	NaN	NaN	NaN	NaN	NaN	NaN	NaN	NaN	NaN	NaN	NaN	NaN	NaN	NaN	NaN	NaN	NaN	NaN
P17813	Endoglin	ENG	24.2574	24.5356	NaN	NaN	NaN	NaN	NaN	NaN	NaN	NaN	NaN	NaN	NaN	NaN	NaN	NaN	NaN	NaN	NaN	NaN	NaN	NaN	NaN	NaN	NaN	NaN	NaN	NaN	NaN	NaN	NaN	NaN	NaN	NaN	NaN	NaN	NaN	NaN	NaN	NaN	NaN	NaN	NaN	NaN	NaN	NaN	NaN
P06733	Alpha-enolase	ENO1	33.3847	33.2423	32.6025	33.7014	32.445	32.4489	31.3368	32.3314	31.6064	31.8066	31.1211	32.8765	33.1867	33.6051	33.579	33.1307	33.1366	33.5906	32.8051	33.319	33.0861	33.7907	33.2179	33.4035	33.1734	32.7276	32.8153	33.0033	31.3925	31.929	31.6338	31.9196	31.5044	33.4598	33.5458	33.7317	33.5452	33.2186	32.917	32.6236	32.7375	33.0962	32.9284	32.3364	33.7959	33.5084	33.4706
P09104	Gamma-enolase	ENO2	26.7429	27.943	28.2142	26.9743	27.4121	27.5554	26.4089	27.2426	27.4633	27.7713	26.9487	27.9432	28.2005	28.9625	28.2834	28.0784	27.8434	27.9052	26.765	27.649	NaN	27.3231	27.8921	28.052	27.8196	27.4916	27.4053	28.2008	27.1758	26.637	27.2638	27.78	27.3444	27.3948	27.3522	28.4878	27.2996	27.7928	26.4274	27.0845	27.4626	27.7637	27.6826	NaN	29.317	28.5506	29.019
P13929	Beta-enolase	ENO3	31.9453	26.4809	NaN	33.0071	25.9736	NaN	21.7791	NaN	NaN	NaN	NaN	26.9367	28.5409	28.1204	31.9913	27.9759	28.901	28.5792	29.9552	27.5549	27.6628	27.4476	NaN	NaN	22.5026	25.9846	22.8885	NaN	NaN	NaN	NaN	NaN	NaN	29.763	25.7972	NaN	30.8309	28.7167	26.995	27.5319	23.7185	27.9417	NaN	22.922	NaN	NaN	NaN
Q9UHY7	Enolase-phosphatase E1	ENOPH1	NaN	NaN	NaN	NaN	NaN	NaN	NaN	NaN	NaN	NaN	NaN	22.837	NaN	NaN	NaN	NaN	NaN	NaN	NaN	NaN	NaN	NaN	NaN	NaN	NaN	NaN	NaN	NaN	NaN	NaN	NaN	NaN	NaN	NaN	NaN	NaN	NaN	NaN	NaN	NaN	NaN	NaN	NaN	NaN	NaN	NaN	NaN
P22413	Ectonucleotide pyrophosphatase/phosphodiesterase family member 1;Alkaline phosphodiesterase I;Nucleotide pyrophosphatase	ENPP1	25.5779	25.4672	26.4756	23.3095	25.7687	NaN	NaN	NaN	NaN	NaN	NaN	26.4285	27.1339	27.0146	27.8012	26.8667	26.1904	NaN	NaN	26.2911	25.2599	26.1953	26.0244	25.8226	26.3845	NaN	25.5626	NaN	NaN	NaN	NaN	NaN	NaN	26.8363	28.1461	NaN	26.0275	26.6694	27.0506	24.6224	NaN	NaN	NaN	25.5086	26.8975	25.3251	26.7867
Q13822	Ectonucleotide pyrophosphatase/phosphodiesterase family member 2	ENPP2	26.2659	27.6048	NaN	25.5597	27.3205	27.0281	26.4083	25.8782	24.0705	26.7115	26.5535	27.8914	28.4748	28.3244	26.7057	29.9024	30.662	30.2922	30.4126	30.0746	29.8851	30.8442	25.4885	25.305	NaN	NaN	27.1059	NaN	25.7152	23.5949	24.0032	24.5558	26.1742	NaN	29.1559	26.2634	24.3895	28.8274	27.9012	28.7676	30.0624	28.4318	28.7395	28.8536	26.3037	26.1936	26.2533
P49961	Ectonucleoside triphosphate diphosphohydrolase 1	ENTPD1	23.9445	NaN	NaN	NaN	NaN	NaN	NaN	NaN	NaN	NaN	NaN	NaN	NaN	NaN	NaN	NaN	NaN	NaN	NaN	NaN	NaN	NaN	NaN	NaN	NaN	NaN	NaN	NaN	NaN	NaN	NaN	NaN	NaN	NaN	NaN	NaN	NaN	NaN	NaN	NaN	NaN	NaN	NaN	NaN	NaN	NaN	NaN
P11171	Protein 4.1	EPB41	NaN	NaN	NaN	NaN	NaN	NaN	NaN	NaN	NaN	NaN	NaN	NaN	NaN	NaN	NaN	NaN	NaN	NaN	NaN	NaN	NaN	NaN	NaN	NaN	NaN	NaN	NaN	NaN	NaN	NaN	NaN	NaN	NaN	NaN	NaN	NaN	NaN	NaN	NaN	NaN	NaN	NaN	NaN	NaN	NaN	NaN	NaN
O43491	Band 4.1-like protein 2	EPB41L2	28.3379	28.4258	26.9436	28.3143	NaN	NaN	NaN	NaN	NaN	NaN	NaN	NaN	26.4397	26.707	27.4875	NaN	NaN	27.1254	NaN	NaN	NaN	NaN	28.3446	26.378	27.1264	NaN	NaN	NaN	NaN	NaN	NaN	NaN	NaN	26.8405	26.3827	27.9859	27.6317	27.1578	NaN	NaN	26.875	25.7954	NaN	NaN	NaN	27.0236	NaN
Q9Y2J2	Band 4.1-like protein 3;Band 4.1-like protein 3, N-terminally processed	EPB41L3	25.9593	25.0688	NaN	26.1131	NaN	NaN	NaN	NaN	NaN	NaN	NaN	NaN	NaN	NaN	NaN	NaN	NaN	NaN	NaN	NaN	NaN	NaN	NaN	NaN	NaN	NaN	NaN	NaN	NaN	NaN	NaN	NaN	NaN	NaN	NaN	NaN	NaN	NaN	NaN	NaN	NaN	NaN	NaN	NaN	NaN	NaN	NaN
Q9UM22	Mammalian ependymin-related protein 1	EPDR1	25.3981	NaN	NaN	25.9352	NaN	NaN	NaN	NaN	NaN	NaN	NaN	NaN	NaN	NaN	NaN	NaN	NaN	NaN	NaN	NaN	NaN	NaN	NaN	NaN	NaN	NaN	NaN	NaN	NaN	NaN	NaN	NaN	NaN	NaN	NaN	NaN	NaN	NaN	NaN	NaN	NaN	NaN	NaN	NaN	NaN	NaN	NaN
P07099	Epoxide hydrolase 1	EPHX1	29.253	27.8528	NaN	28.2611	NaN	NaN	NaN	NaN	NaN	NaN	NaN	NaN	25.3065	NaN	NaN	NaN	NaN	NaN	NaN	NaN	NaN	NaN	26.4088	NaN	NaN	NaN	NaN	NaN	NaN	NaN	NaN	NaN	NaN	NaN	NaN	NaN	NaN	NaN	NaN	NaN	NaN	NaN	NaN	30.5419	NaN	NaN	NaN
Q9Y6I3	Epsin-1	EPN1	22.2856	NaN	NaN	NaN	NaN	NaN	NaN	NaN	NaN	NaN	NaN	NaN	NaN	NaN	NaN	NaN	NaN	NaN	NaN	NaN	NaN	NaN	NaN	NaN	NaN	NaN	NaN	NaN	NaN	NaN	NaN	NaN	NaN	NaN	NaN	NaN	NaN	NaN	NaN	NaN	NaN	NaN	NaN	NaN	NaN	NaN	NaN
P07814	Bifunctional glutamate/proline--tRNA ligase;Glutamate--tRNA ligase;Proline--tRNA ligase	EPRS	23.6492	24.1519	NaN	23.3531	NaN	NaN	NaN	NaN	NaN	NaN	NaN	NaN	NaN	NaN	NaN	NaN	NaN	NaN	NaN	NaN	NaN	NaN	NaN	24.6297	NaN	NaN	NaN	NaN	NaN	NaN	NaN	NaN	NaN	NaN	NaN	NaN	NaN	NaN	NaN	NaN	NaN	NaN	NaN	NaN	NaN	24.8143	NaN
P42566	Epidermal growth factor receptor substrate 15	EPS15	25.4962	25.6763	NaN	25.9159	NaN	NaN	NaN	NaN	NaN	NaN	NaN	NaN	NaN	NaN	NaN	NaN	NaN	NaN	NaN	NaN	NaN	NaN	NaN	NaN	NaN	NaN	NaN	NaN	NaN	NaN	NaN	NaN	NaN	NaN	NaN	NaN	NaN	NaN	NaN	NaN	NaN	NaN	NaN	NaN	NaN	NaN	NaN
Q9UBC2	Epidermal growth factor receptor substrate 15-like 1	EPS15L1	24.1025	24.4199	NaN	24.543	NaN	NaN	NaN	NaN	NaN	NaN	NaN	NaN	24.4791	NaN	NaN	NaN	NaN	NaN	NaN	NaN	NaN	NaN	NaN	NaN	NaN	NaN	NaN	NaN	NaN	NaN	NaN	NaN	NaN	NaN	24.3081	NaN	NaN	NaN	NaN	NaN	NaN	NaN	NaN	NaN	NaN	NaN	NaN
Q9H6S3	Epidermal growth factor receptor kinase substrate 8-like protein 2	EPS8L2	NaN	NaN	NaN	NaN	NaN	NaN	NaN	NaN	NaN	NaN	NaN	NaN	NaN	NaN	24.1299	NaN	NaN	NaN	NaN	NaN	NaN	NaN	NaN	NaN	NaN	NaN	NaN	NaN	NaN	NaN	NaN	NaN	NaN	NaN	NaN	NaN	NaN	NaN	NaN	NaN	NaN	NaN	NaN	NaN	NaN	NaN	NaN
P11678	Eosinophil peroxidase;Eosinophil peroxidase light chain;Eosinophil peroxidase heavy chain	EPX	26.1462	26.2239	NaN	27.5363	NaN	NaN	NaN	NaN	NaN	NaN	NaN	NaN	24.8866	NaN	NaN	NaN	NaN	NaN	NaN	NaN	NaN	NaN	27.3699	NaN	NaN	25.6741	25.3177	NaN	NaN	NaN	NaN	NaN	NaN	NaN	NaN	26.6136	NaN	NaN	NaN	NaN	NaN	NaN	NaN	NaN	27.3383	25.1941	26.4604
Q99645	Epiphycan	EPYC	NaN	23.3299	25.1415	NaN	26.0968	27.078	30.403	27.1715	28.444	30.6426	29.2711	23.379	NaN	26.0102	22.698	NaN	26.341	24.3988	NaN	NaN	NaN	25.0855	24.6099	25.789	NaN	24.7755	28.6493	29.7197	29.0666	29.5515	27.6834	29.8999	28.6809	NaN	NaN	28.4772	27.347	NaN	NaN	NaN	NaN	23.9743	NaN	25.4668	28.6508	27.5743	31.1661
Q9NZ08	Endoplasmic reticulum aminopeptidase 1	ERAP1	24.8496	23.9064	NaN	NaN	NaN	NaN	NaN	NaN	NaN	NaN	26.6994	NaN	NaN	NaN	NaN	NaN	27.4924	NaN	NaN	NaN	NaN	NaN	NaN	NaN	NaN	NaN	NaN	NaN	NaN	NaN	NaN	NaN	NaN	27.3537	NaN	NaN	NaN	26.5635	NaN	NaN	NaN	NaN	NaN	NaN	NaN	NaN	NaN
Q6P179	Endoplasmic reticulum aminopeptidase 2	ERAP2	NaN	24.1025	NaN	NaN	NaN	NaN	NaN	NaN	NaN	NaN	NaN	NaN	NaN	NaN	NaN	NaN	NaN	NaN	NaN	NaN	NaN	NaN	NaN	NaN	NaN	NaN	NaN	NaN	NaN	NaN	NaN	NaN	NaN	NaN	NaN	NaN	NaN	NaN	NaN	NaN	NaN	NaN	NaN	NaN	NaN	NaN	NaN
Q8IUD2	ELKS/Rab6-interacting/CAST family member 1	ERC1	NaN	23.9449	NaN	23.1141	NaN	NaN	NaN	NaN	NaN	NaN	NaN	NaN	NaN	NaN	NaN	NaN	NaN	NaN	NaN	NaN	NaN	NaN	NaN	NaN	NaN	NaN	NaN	NaN	NaN	NaN	NaN	NaN	NaN	NaN	NaN	NaN	NaN	NaN	NaN	NaN	NaN	NaN	NaN	NaN	NaN	NaN	NaN
Q969X5	Endoplasmic reticulum-Golgi intermediate compartment protein 1	ERGIC1	21.8594	NaN	NaN	NaN	NaN	NaN	NaN	NaN	NaN	NaN	NaN	NaN	NaN	NaN	NaN	NaN	NaN	NaN	NaN	NaN	NaN	NaN	NaN	NaN	NaN	NaN	NaN	NaN	NaN	NaN	NaN	NaN	NaN	NaN	NaN	NaN	NaN	NaN	NaN	NaN	NaN	NaN	NaN	NaN	NaN	NaN	NaN
P84090	Enhancer of rudimentary homolog	ERH	24.4933	26.3589	NaN	25.0878	NaN	NaN	NaN	NaN	NaN	NaN	NaN	NaN	NaN	NaN	NaN	NaN	NaN	NaN	NaN	NaN	NaN	NaN	25.2774	NaN	NaN	NaN	NaN	NaN	NaN	NaN	NaN	NaN	NaN	NaN	NaN	NaN	NaN	NaN	NaN	NaN	NaN	NaN	NaN	NaN	NaN	NaN	NaN
Q96DZ1	Endoplasmic reticulum lectin 1	ERLEC1	NaN	NaN	NaN	25.1111	NaN	NaN	NaN	NaN	NaN	NaN	NaN	NaN	NaN	NaN	NaN	NaN	NaN	NaN	NaN	NaN	NaN	NaN	NaN	NaN	NaN	NaN	NaN	NaN	NaN	NaN	NaN	NaN	NaN	NaN	NaN	NaN	NaN	NaN	NaN	NaN	NaN	NaN	NaN	NaN	NaN	NaN	NaN
O75477	Erlin-1	ERLIN1	NaN	22.3059	NaN	NaN	NaN	NaN	NaN	NaN	NaN	NaN	NaN	NaN	NaN	NaN	NaN	NaN	NaN	NaN	NaN	NaN	NaN	NaN	NaN	NaN	NaN	NaN	NaN	NaN	NaN	NaN	NaN	NaN	NaN	NaN	NaN	NaN	NaN	NaN	NaN	NaN	NaN	NaN	NaN	NaN	NaN	NaN	NaN
O94905	Erlin-2	ERLIN2	24.4625	24.8719	NaN	NaN	NaN	NaN	NaN	NaN	NaN	NaN	NaN	NaN	NaN	NaN	NaN	NaN	NaN	NaN	NaN	NaN	NaN	NaN	NaN	NaN	NaN	NaN	NaN	NaN	NaN	NaN	NaN	NaN	NaN	NaN	NaN	NaN	NaN	NaN	NaN	NaN	NaN	NaN	NaN	NaN	NaN	NaN	NaN
Q96HE7	ERO1-like protein alpha	ERO1L	24.7376	25.6927	25.8513	25.0403	24.8308	25.7208	NaN	NaN	NaN	25.9199	25.1348	NaN	NaN	NaN	25.0264	NaN	NaN	NaN	NaN	NaN	NaN	NaN	25.8566	25.7195	NaN	NaN	25.985	NaN	25.0701	NaN	25.5709	NaN	NaN	NaN	NaN	NaN	NaN	NaN	NaN	NaN	NaN	NaN	NaN	NaN	NaN	25.3789	NaN
P30040	Endoplasmic reticulum resident protein 29	ERP29	25.7146	25.9312	NaN	26.7824	NaN	NaN	NaN	24.1858	NaN	NaN	NaN	NaN	NaN	NaN	NaN	NaN	NaN	NaN	NaN	NaN	NaN	NaN	24.8793	NaN	NaN	NaN	NaN	NaN	NaN	NaN	NaN	NaN	NaN	NaN	NaN	NaN	NaN	NaN	NaN	NaN	NaN	NaN	NaN	NaN	25.4918	NaN	NaN
Q9BS26	Endoplasmic reticulum resident protein 44	ERP44	26.6974	26.8435	NaN	27.5949	24.2347	NaN	NaN	24.8779	NaN	NaN	NaN	25.6957	26.2859	25.4106	27.0559	NaN	NaN	NaN	25.1527	NaN	26.389	26.0015	26.9021	NaN	NaN	25.8103	25.4361	NaN	24.1019	NaN	24.7514	NaN	NaN	25.7305	26.5215	NaN	27.569	26.2212	26.9083	26.3118	24.8021	NaN	26.2575	25.5964	25.6455	25.7698	26.9107
P10768	S-formylglutathione hydrolase	ESD	28.9688	28.6021	23.8584	29.2196	NaN	23.2484	NaN	NaN	NaN	NaN	NaN	NaN	26.9476	NaN	26.8695	NaN	25.7134	NaN	NaN	NaN	NaN	25.6677	26.3785	24.9724	26.7149	NaN	24.8349	NaN	24.5808	NaN	24.1758	NaN	NaN	26.4956	NaN	NaN	NaN	NaN	NaN	NaN	NaN	NaN	26.5891	NaN	26.0369	25.6384	NaN
Q9BSJ8	Extended synaptotagmin-1	ESYT1	26.4522	27.2744	NaN	25.6946	NaN	NaN	NaN	NaN	NaN	NaN	NaN	NaN	25.9573	NaN	NaN	NaN	NaN	NaN	NaN	NaN	NaN	NaN	NaN	NaN	NaN	NaN	NaN	NaN	NaN	NaN	NaN	NaN	NaN	NaN	25.9115	NaN	NaN	NaN	NaN	NaN	NaN	27.3556	26.0448	NaN	NaN	NaN	29.8326
A0FGR8	Extended synaptotagmin-2	ESYT2	NaN	NaN	NaN	NaN	NaN	NaN	NaN	NaN	NaN	NaN	NaN	NaN	NaN	NaN	NaN	NaN	NaN	NaN	NaN	NaN	NaN	NaN	NaN	NaN	NaN	NaN	NaN	NaN	NaN	NaN	NaN	NaN	NaN	NaN	NaN	NaN	NaN	NaN	NaN	NaN	NaN	NaN	NaN	NaN	NaN	NaN	NaN
P62495	Eukaryotic peptide chain release factor subunit 1	ETF1	24.8463	24.3725	NaN	24.9482	NaN	NaN	NaN	NaN	NaN	NaN	NaN	NaN	NaN	NaN	NaN	NaN	NaN	NaN	NaN	NaN	NaN	NaN	NaN	NaN	NaN	NaN	NaN	NaN	NaN	NaN	NaN	NaN	NaN	NaN	NaN	NaN	NaN	NaN	NaN	NaN	NaN	NaN	NaN	NaN	NaN	NaN	NaN
P13804	Electron transfer flavoprotein subunit alpha, mitochondrial	ETFA	27.3824	27.3733	NaN	28.3999	NaN	NaN	NaN	NaN	NaN	NaN	NaN	NaN	NaN	NaN	NaN	NaN	NaN	NaN	NaN	NaN	NaN	NaN	24.5917	NaN	NaN	NaN	NaN	NaN	NaN	NaN	NaN	NaN	NaN	NaN	NaN	25.502	NaN	NaN	NaN	NaN	NaN	NaN	NaN	NaN	NaN	NaN	NaN
P38117	Electron transfer flavoprotein subunit beta	ETFB	27.3685	26.7764	NaN	28.4622	NaN	NaN	NaN	NaN	NaN	NaN	NaN	24.6857	24.2679	NaN	24.0041	NaN	NaN	NaN	NaN	NaN	NaN	NaN	26.0957	NaN	NaN	NaN	NaN	NaN	NaN	NaN	NaN	NaN	NaN	25.7753	NaN	NaN	NaN	NaN	NaN	NaN	NaN	NaN	NaN	NaN	NaN	NaN	NaN
Q16134	Electron transfer flavoprotein-ubiquinone oxidoreductase, mitochondrial	ETFDH	NaN	NaN	NaN	23.4215	NaN	NaN	NaN	NaN	NaN	NaN	NaN	NaN	NaN	NaN	NaN	NaN	NaN	NaN	NaN	NaN	NaN	NaN	NaN	NaN	NaN	NaN	NaN	NaN	NaN	NaN	NaN	NaN	NaN	NaN	NaN	NaN	NaN	NaN	NaN	NaN	NaN	NaN	NaN	NaN	NaN	NaN	NaN
O95571	Persulfide dioxygenase ETHE1, mitochondrial	ETHE1	24.7626	25.1772	NaN	25.432	NaN	NaN	NaN	NaN	NaN	NaN	NaN	NaN	NaN	NaN	NaN	NaN	NaN	NaN	NaN	NaN	NaN	NaN	NaN	NaN	NaN	NaN	NaN	NaN	NaN	NaN	NaN	NaN	NaN	NaN	NaN	NaN	NaN	NaN	NaN	NaN	NaN	NaN	NaN	NaN	NaN	NaN	NaN
Q01844	RNA-binding protein EWS	EWSR1	24.6107	25.2627	NaN	NaN	NaN	NaN	NaN	NaN	NaN	NaN	NaN	23.5507	24.5687	NaN	NaN	NaN	NaN	NaN	NaN	NaN	NaN	NaN	NaN	NaN	NaN	NaN	NaN	NaN	NaN	NaN	NaN	NaN	NaN	NaN	NaN	NaN	NaN	NaN	NaN	NaN	NaN	NaN	NaN	NaN	NaN	NaN	NaN
Q16394	Exostosin-1	EXT1	NaN	NaN	NaN	NaN	NaN	NaN	NaN	NaN	NaN	NaN	NaN	NaN	NaN	NaN	NaN	NaN	NaN	NaN	NaN	NaN	NaN	NaN	NaN	NaN	NaN	NaN	NaN	NaN	NaN	NaN	23.7318	NaN	NaN	NaN	NaN	NaN	NaN	NaN	NaN	NaN	NaN	NaN	NaN	NaN	NaN	NaN	NaN
P15311	Ezrin	EZR	26.5106	27.1414	26.1744	26.4006	25.5019	24.9963	NaN	NaN	26.0358	NaN	23.4774	26.3032	27.2499	26.4511	26.7309	27.3797	26.164	24.6498	25.858	NaN	NaN	NaN	26.8016	26.9834	26.7558	26.689	25.6572	NaN	NaN	NaN	25.8193	NaN	25.4875	27.9397	27.6301	NaN	26.8088	27.3577	NaN	NaN	NaN	NaN	26.8082	25.6861	NaN	25.6509	25.4031
P00742	Coagulation factor X;Factor X light chain;Factor X heavy chain;Activated factor Xa heavy chain	F10	25.1237	25.7332	28.6535	25.9777	28.0236	28.7734	27.8969	28.156	28.1206	26.724	28.0362	27.185	NaN	NaN	NaN	NaN	NaN	NaN	NaN	NaN	NaN	NaN	25.28	26.8375	28.4347	25.2288	25.7728	26.018	27.6903	27.6381	29.3194	26.7	28.9394	NaN	NaN	NaN	NaN	NaN	NaN	NaN	26.216	NaN	NaN	NaN	NaN	NaN	27.6759
P03951	Coagulation factor XI;Coagulation factor XIa heavy chain;Coagulation factor XIa light chain	F11	26.0894	27.0631	27.1491	26.0655	28.1537	27.61	26.884	28.0301	27.4979	26.8412	27.2477	27.4918	NaN	NaN	NaN	NaN	24.5935	NaN	NaN	NaN	NaN	NaN	25.1792	26.3102	25.5067	NaN	25.7079	NaN	26.1073	25.2738	26.5372	NaN	26.3427	NaN	NaN	NaN	NaN	NaN	NaN	NaN	NaN	NaN	NaN	NaN	NaN	NaN	NaN
P00748	Coagulation factor XII;Coagulation factor XIIa heavy chain;Beta-factor XIIa part 1;Coagulation factor XIIa light chain	F12	28.8725	29.3902	29.8225	29.0032	31.6485	30.8211	31.5398	31.0417	31.6361	30.5028	31.6716	28.5029	NaN	NaN	NaN	NaN	NaN	26.7874	NaN	NaN	NaN	25.8446	28.421	29.0822	28.3905	28.2227	30.1484	27.8145	30.7255	30.548	31.2247	29.7057	30.9051	NaN	NaN	26.5866	NaN	NaN	NaN	NaN	NaN	NaN	NaN	25.6227	NaN	25.6625	26.1257
P00488	Coagulation factor XIII A chain	F13A1	31.3496	31.2598	28.9037	30.0304	30.4641	29.9136	29.7644	30.2527	30.1772	29.7535	29.456	29.0061	28.1956	29.4895	27.5832	27.1879	26.376	28.2188	23.3126	28.3516	28.8521	27.9123	29.8042	30.72	30.2481	31.0526	31.0695	30.1672	29.5044	30.5736	30.1827	30.504	29.8368	27.4192	27.6906	29.8008	26.3763	27.7008	27.0884	23.6422	27.9597	24.6692	27.0219	23.26	31.564	31.4232	31.1708
P05160	Coagulation factor XIII B chain	F13B	25.8687	25.2833	29.4955	22.7243	30.8485	29.5254	29.2156	27.5367	29.3659	27.2825	29.575	30.0917	23.2893	NaN	NaN	NaN	NaN	NaN	NaN	NaN	NaN	NaN	23.1186	25.6402	27.512	NaN	25.8086	24.0639	29.806	27.4406	29.9828	25.1436	30.1853	NaN	NaN	NaN	24.791	NaN	NaN	NaN	NaN	NaN	NaN	NaN	NaN	NaN	29.5878
P00734	Prothrombin;Activation peptide fragment 1;Activation peptide fragment 2;Thrombin light chain;Thrombin heavy chain	F2	31.6356	31.9313	32.7707	31.6134	32.9957	32.5478	33.5028	32.9739	33.1628	32.6015	33.5675	32.201	25.2617	25.0298	22.8619	22.7204	21.4777	NaN	23.808	23.9106	22.9404	NaN	29.6463	29.6267	30.772	28.8366	31.3321	30.6557	32.5739	32.3294	32.3919	31.8327	32.5219	26.5643	24.281	25.15	24.6636	24.0979	24.1088	24.0633	22.5189	23.9289	22.8242	23.5339	26.0109	28.827	27.8737
P12259	Coagulation factor V;Coagulation factor V heavy chain;Coagulation factor V light chain	F5	22.1661	24.9998	29.107	25.7827	28.0859	28.6073	24.9771	27.7305	27.3886	24.6671	27.8956	25.8803	24.7415	NaN	26.1823	NaN	NaN	NaN	NaN	NaN	26.4007	NaN	NaN	23.7063	27.1966	NaN	NaN	NaN	25.7427	NaN	29.1919	NaN	27.3234	NaN	NaN	NaN	26.8044	25.576	NaN	NaN	NaN	NaN	NaN	NaN	NaN	24.3808	26.7334
P08709	Coagulation factor VII;Factor VII light chain;Factor VII heavy chain	F7	NaN	NaN	24.7363	NaN	24.5557	24.7385	NaN	NaN	NaN	NaN	24.5299	NaN	NaN	NaN	NaN	NaN	NaN	NaN	NaN	NaN	NaN	NaN	NaN	NaN	NaN	NaN	NaN	NaN	NaN	NaN	24.7265	NaN	24.1865	NaN	NaN	NaN	NaN	NaN	NaN	NaN	NaN	NaN	NaN	NaN	NaN	NaN	NaN
P00740	Coagulation factor IX;Coagulation factor IXa light chain;Coagulation factor IXa heavy chain	F9	25.1315	27.9079	29.9137	26.3956	28.9203	29.6258	27.8694	29.0102	28.6052	27.6921	29.2655	27.0937	NaN	NaN	NaN	NaN	NaN	NaN	NaN	NaN	NaN	NaN	25.9203	26.6439	28.2942	NaN	NaN	NaN	28.0312	26.5459	29.3471	26.0367	27.8836	NaN	NaN	NaN	NaN	NaN	NaN	NaN	NaN	NaN	NaN	NaN	NaN	24.0155	27.2571
P07148	Fatty acid-binding protein, liver	FABP1	NaN	NaN	NaN	NaN	22.4214	NaN	NaN	NaN	NaN	NaN	NaN	NaN	NaN	NaN	NaN	NaN	NaN	NaN	NaN	NaN	NaN	NaN	NaN	NaN	NaN	NaN	NaN	NaN	NaN	NaN	NaN	NaN	NaN	NaN	NaN	NaN	NaN	NaN	NaN	NaN	NaN	NaN	NaN	NaN	NaN	NaN	NaN
P05413	Fatty acid-binding protein, heart	FABP3	32.3148	28.5079	26.9855	32.2734	25.9837	26.5294	25.6325	26.4412	26.2175	NaN	25.6532	28.0626	27.7945	28.959	30.0212	26.7225	28.81	27.3156	27.3119	NaN	27.4474	27.3972	30.0473	27.6628	28.0782	29.1083	27.0695	NaN	25.208	NaN	26.9564	NaN	25.2878	30.3232	28.4309	28.0808	29.2191	29.9183	NaN	28.971	NaN	NaN	28.4365	29.3047	28.5135	26.2262	27.6237
P15090	Fatty acid-binding protein, adipocyte	FABP4	31.2562	31.1203	NaN	31.5395	NaN	24.329	NaN	25.0903	NaN	NaN	26.0594	24.6394	26.2598	26.1688	27.4035	26.5547	26.2334	NaN	NaN	NaN	NaN	NaN	29.9215	29.9349	27.1963	29.2352	27.711	NaN	NaN	NaN	23.7851	NaN	NaN	29.1214	NaN	NaN	27.3458	NaN	NaN	NaN	NaN	NaN	NaN	NaN	31.2217	28.4477	28.1242
Q01469	Fatty acid-binding protein, epidermal	FABP5	29.5262	29.9007	25.4158	29.746	24.6044	24.493	NaN	NaN	NaN	NaN	NaN	24.6463	26.5066	29.0169	25.5684	25.61	NaN	25.6375	NaN	NaN	NaN	26.8704	27.9858	25.8729	27.5864	25.1229	25.9955	25.3728	NaN	NaN	NaN	24.745	NaN	25.2143	NaN	NaN	23.9995	NaN	NaN	NaN	NaN	NaN	NaN	NaN	27.7402	27.5649	NaN
P16930	Fumarylacetoacetase	FAH	NaN	23.2437	NaN	NaN	NaN	NaN	NaN	NaN	NaN	NaN	NaN	NaN	NaN	NaN	NaN	NaN	NaN	NaN	NaN	NaN	NaN	NaN	NaN	NaN	NaN	NaN	NaN	NaN	NaN	NaN	NaN	NaN	NaN	NaN	NaN	NaN	NaN	NaN	NaN	NaN	NaN	NaN	NaN	NaN	NaN	NaN	NaN
Q6P587	Acylpyruvase FAHD1, mitochondrial	FAHD1	NaN	NaN	NaN	22.971	NaN	NaN	NaN	NaN	NaN	NaN	NaN	NaN	NaN	NaN	NaN	NaN	NaN	NaN	NaN	NaN	NaN	NaN	NaN	NaN	NaN	NaN	NaN	NaN	NaN	NaN	NaN	NaN	NaN	NaN	NaN	NaN	NaN	NaN	NaN	NaN	NaN	NaN	NaN	NaN	NaN	NaN	NaN
Q9H098	Protein FAM107B	FAM107B	NaN	NaN	NaN	21.6448	NaN	NaN	NaN	NaN	NaN	NaN	NaN	NaN	NaN	NaN	NaN	NaN	NaN	NaN	NaN	NaN	NaN	NaN	NaN	NaN	NaN	NaN	NaN	NaN	NaN	NaN	NaN	NaN	NaN	NaN	NaN	NaN	NaN	NaN	NaN	NaN	NaN	NaN	NaN	NaN	NaN	NaN	NaN
Q8IWE2	Protein NOXP20	FAM114A1	25.1382	26.0697	NaN	NaN	NaN	NaN	NaN	NaN	NaN	NaN	NaN	NaN	NaN	NaN	NaN	NaN	NaN	NaN	NaN	NaN	NaN	25.0717	25.3599	NaN	NaN	NaN	NaN	NaN	NaN	NaN	NaN	NaN	NaN	NaN	NaN	NaN	NaN	NaN	NaN	NaN	NaN	NaN	NaN	NaN	NaN	NaN	NaN
Q9NZB2	Constitutive coactivator of PPAR-gamma-like protein 1	FAM120A	NaN	24.6249	NaN	NaN	NaN	NaN	NaN	NaN	NaN	NaN	NaN	NaN	NaN	NaN	NaN	NaN	NaN	NaN	NaN	NaN	NaN	NaN	NaN	NaN	NaN	NaN	NaN	NaN	NaN	NaN	NaN	NaN	NaN	NaN	NaN	NaN	NaN	NaN	NaN	NaN	NaN	NaN	NaN	NaN	NaN	NaN	NaN
Q9BZQ8	Protein Niban	FAM129A	24.607	25.577	NaN	24.5307	NaN	NaN	NaN	NaN	NaN	NaN	NaN	NaN	25.0124	NaN	NaN	NaN	NaN	NaN	NaN	25.6117	NaN	NaN	25.3484	NaN	NaN	NaN	NaN	NaN	NaN	NaN	NaN	NaN	NaN	NaN	NaN	NaN	25.1163	NaN	NaN	NaN	NaN	NaN	NaN	NaN	NaN	NaN	NaN
Q96TA1	Niban-like protein 1	FAM129B	24.7221	26.5379	24.9971	24.2357	NaN	24.3525	NaN	NaN	NaN	NaN	25.5403	24.9512	NaN	27.0757	26.4164	NaN	NaN	26.8466	NaN	NaN	NaN	NaN	23.1411	NaN	25.6831	NaN	NaN	NaN	24.602	NaN	NaN	NaN	23.5699	NaN	23.9545	NaN	NaN	NaN	NaN	NaN	NaN	NaN	NaN	NaN	NaN	NaN	NaN
Q96A26	Protein FAM162A	FAM162A	NaN	24.5391	NaN	24.6866	NaN	NaN	NaN	NaN	NaN	NaN	NaN	NaN	NaN	NaN	NaN	NaN	NaN	NaN	NaN	NaN	NaN	NaN	NaN	NaN	NaN	NaN	NaN	NaN	NaN	NaN	NaN	NaN	NaN	NaN	NaN	NaN	26.748	NaN	NaN	NaN	NaN	NaN	NaN	NaN	NaN	NaN	NaN
Q6UWF9	Protein FAM180A	FAM180A	NaN	24.2448	NaN	NaN	NaN	26.7956	NaN	NaN	NaN	NaN	25.5266	NaN	NaN	NaN	25.5084	26.6682	26.6213	NaN	NaN	NaN	24.9808	NaN	NaN	NaN	NaN	NaN	NaN	NaN	NaN	NaN	NaN	NaN	NaN	NaN	NaN	NaN	NaN	NaN	NaN	NaN	26.6986	NaN	NaN	NaN	NaN	NaN	NaN
Q6P0A1	Protein FAM180B	FAM180B	25.0721	29.0239	NaN	NaN	26.5992	NaN	NaN	NaN	NaN	NaN	NaN	NaN	29.4606	NaN	27.1767	NaN	NaN	NaN	NaN	NaN	NaN	NaN	26.1665	27.0615	NaN	27.726	NaN	NaN	NaN	NaN	NaN	NaN	NaN	26.3507	28.644	NaN	26.9232	NaN	NaN	NaN	NaN	NaN	NaN	NaN	NaN	NaN	NaN
Q9ULE4	Protein FAM184B	FAM184B	24.5859	25.4592	NaN	23.8683	27.4747	NaN	NaN	NaN	NaN	NaN	23.2067	NaN	NaN	NaN	NaN	NaN	NaN	NaN	NaN	NaN	NaN	NaN	NaN	NaN	NaN	NaN	NaN	NaN	NaN	NaN	NaN	NaN	NaN	NaN	NaN	NaN	NaN	NaN	NaN	NaN	NaN	NaN	NaN	NaN	NaN	NaN	NaN
Q8IXL6	Extracellular serine/threonine protein kinase FAM20C	FAM20C	NaN	NaN	24.5088	NaN	25.4321	25.7414	25.6106	NaN	26.5378	25.5162	25.2074	NaN	NaN	NaN	NaN	24.2519	24.8564	24.7756	NaN	NaN	NaN	25.7695	25.3743	25.1968	NaN	NaN	25.9697	25.2078	25.6201	25.4954	26.5539	NaN	25.8414	NaN	NaN	NaN	NaN	NaN	NaN	NaN	NaN	NaN	NaN	NaN	NaN	25.8456	25.2741
Q9BRX8	Redox-regulatory protein FAM213A	FAM213A	23.5861	NaN	NaN	NaN	NaN	NaN	NaN	NaN	NaN	NaN	NaN	NaN	NaN	NaN	NaN	NaN	NaN	NaN	NaN	NaN	NaN	NaN	NaN	NaN	NaN	NaN	NaN	NaN	NaN	NaN	NaN	NaN	NaN	NaN	NaN	NaN	NaN	NaN	NaN	NaN	NaN	NaN	NaN	NaN	NaN	NaN	NaN
Q9Y4E1;Q641Q2	WASH complex subunit FAM21C;WASH complex subunit FAM21A	FAM21C;FAM21A	NaN	23.7317	NaN	NaN	NaN	NaN	NaN	NaN	NaN	NaN	NaN	NaN	NaN	NaN	NaN	NaN	NaN	NaN	NaN	NaN	NaN	NaN	NaN	NaN	NaN	NaN	NaN	NaN	NaN	NaN	NaN	NaN	NaN	NaN	NaN	NaN	NaN	NaN	NaN	NaN	NaN	NaN	NaN	NaN	NaN	NaN	NaN
Q92520	Protein FAM3C	FAM3C	NaN	NaN	NaN	NaN	24.0681	NaN	NaN	NaN	NaN	23.3269	NaN	NaN	23.8854	NaN	NaN	NaN	NaN	24.1911	NaN	NaN	NaN	NaN	NaN	NaN	NaN	NaN	NaN	NaN	NaN	NaN	NaN	NaN	NaN	NaN	NaN	NaN	NaN	NaN	NaN	NaN	NaN	NaN	NaN	NaN	NaN	NaN	NaN
Q9H0Q0	Protein FAM49A	FAM49A	NaN	22.7171	NaN	NaN	NaN	NaN	NaN	NaN	NaN	NaN	NaN	NaN	NaN	NaN	NaN	NaN	NaN	NaN	NaN	NaN	NaN	NaN	NaN	NaN	NaN	NaN	NaN	NaN	NaN	NaN	NaN	NaN	NaN	NaN	NaN	NaN	NaN	NaN	NaN	NaN	NaN	NaN	NaN	NaN	NaN	NaN	NaN
Q9NUQ9	Protein FAM49B	FAM49B	31.4581	30.5167	NaN	30.2989	NaN	NaN	NaN	NaN	NaN	NaN	NaN	28.3745	NaN	NaN	NaN	NaN	29.0808	NaN	NaN	NaN	NaN	NaN	NaN	NaN	NaN	NaN	NaN	NaN	NaN	NaN	NaN	NaN	NaN	NaN	NaN	NaN	NaN	NaN	NaN	NaN	NaN	NaN	NaN	NaN	NaN	NaN	NaN
Q8NCA5	Protein FAM98A	FAM98A	NaN	NaN	NaN	NaN	NaN	NaN	NaN	NaN	NaN	NaN	NaN	NaN	NaN	NaN	NaN	NaN	NaN	NaN	NaN	NaN	NaN	NaN	NaN	NaN	NaN	NaN	NaN	NaN	NaN	NaN	NaN	NaN	NaN	NaN	NaN	NaN	NaN	NaN	NaN	NaN	NaN	NaN	NaN	NaN	NaN	NaN	NaN
Q52LJ0	Protein FAM98B	FAM98B	24.9169	26.1284	NaN	24.7996	NaN	NaN	NaN	NaN	NaN	NaN	NaN	NaN	NaN	NaN	NaN	NaN	NaN	NaN	NaN	NaN	NaN	NaN	NaN	NaN	NaN	NaN	NaN	NaN	NaN	NaN	NaN	NaN	NaN	NaN	NaN	NaN	NaN	NaN	NaN	NaN	NaN	NaN	NaN	NaN	NaN	NaN	NaN
Q12884	Prolyl endopeptidase FAP;Antiplasmin-cleaving enzyme FAP, soluble form	FAP	23.4386	25.3315	24.5422	22.7101	24.7706	25.0926	25.5128	NaN	24.7783	25.8163	25.5111	24.782	NaN	NaN	NaN	NaN	NaN	NaN	NaN	NaN	NaN	NaN	25.0459	25.1894	NaN	NaN	25.4447	NaN	25.3379	25.9412	25.4639	NaN	NaN	NaN	NaN	NaN	NaN	NaN	NaN	NaN	NaN	NaN	NaN	NaN	NaN	NaN	25.0557
Q9Y285	Phenylalanine--tRNA ligase alpha subunit	FARSA	NaN	NaN	NaN	NaN	NaN	NaN	NaN	NaN	NaN	NaN	NaN	NaN	NaN	NaN	NaN	NaN	NaN	NaN	NaN	NaN	NaN	NaN	22.6844	NaN	NaN	NaN	NaN	NaN	NaN	NaN	NaN	NaN	NaN	NaN	NaN	NaN	NaN	NaN	NaN	NaN	NaN	NaN	NaN	NaN	NaN	NaN	NaN
Q9NSD9	Phenylalanine--tRNA ligase beta subunit	FARSB	NaN	23.2284	NaN	NaN	NaN	NaN	NaN	NaN	NaN	NaN	NaN	NaN	NaN	NaN	NaN	NaN	NaN	NaN	NaN	NaN	NaN	NaN	NaN	NaN	NaN	NaN	NaN	NaN	NaN	NaN	NaN	NaN	NaN	NaN	NaN	NaN	NaN	NaN	NaN	NaN	NaN	NaN	NaN	NaN	NaN	NaN	NaN
P25445	Tumor necrosis factor receptor superfamily member 6	FAS	NaN	NaN	NaN	NaN	NaN	NaN	NaN	NaN	NaN	NaN	NaN	NaN	NaN	NaN	NaN	NaN	NaN	NaN	NaN	NaN	NaN	NaN	NaN	NaN	NaN	NaN	NaN	NaN	NaN	NaN	NaN	NaN	NaN	NaN	NaN	NaN	NaN	NaN	NaN	NaN	NaN	NaN	NaN	NaN	NaN	NaN	NaN
P49327	Fatty acid synthase;[Acyl-carrier-protein] S-acetyltransferase;[Acyl-carrier-protein] S-malonyltransferase;3-oxoacyl-[acyl-carrier-protein] synthase;3-oxoacyl-[acyl-carrier-protein] reductase;3-hydroxyacyl-[acyl-carrier-protein] dehydratase;Enoyl-[acyl-carrier-protein] reductase;Oleoyl-[acyl-carrier-protein] hydrolase	FASN	25.1381	24.939	NaN	NaN	NaN	NaN	NaN	NaN	NaN	NaN	NaN	NaN	NaN	NaN	NaN	NaN	NaN	NaN	NaN	NaN	NaN	NaN	NaN	NaN	NaN	NaN	NaN	NaN	NaN	NaN	NaN	NaN	NaN	NaN	NaN	NaN	NaN	NaN	NaN	NaN	NaN	NaN	NaN	NaN	NaN	NaN	NaN
P62861	40S ribosomal protein S30	FAU	NaN	NaN	NaN	NaN	NaN	NaN	NaN	NaN	NaN	NaN	NaN	NaN	NaN	NaN	NaN	NaN	NaN	NaN	NaN	NaN	NaN	NaN	NaN	NaN	NaN	NaN	NaN	NaN	NaN	NaN	NaN	NaN	NaN	NaN	NaN	NaN	NaN	NaN	NaN	NaN	NaN	NaN	NaN	NaN	NaN	NaN	NaN
P22087	rRNA 2-O-methyltransferase fibrillarin	FBL	21.3949	NaN	NaN	NaN	NaN	NaN	NaN	NaN	NaN	NaN	NaN	NaN	NaN	NaN	NaN	NaN	NaN	NaN	NaN	NaN	NaN	NaN	NaN	NaN	NaN	NaN	NaN	NaN	NaN	NaN	NaN	NaN	NaN	NaN	NaN	NaN	NaN	NaN	NaN	NaN	NaN	NaN	NaN	NaN	NaN	NaN	NaN
P23142	Fibulin-1	FBLN1	31.6416	33.2952	32.3042	31.0109	31.4779	32.0803	29.2354	32.2177	30.374	28.7795	30.0105	30.4976	31.8623	29.6354	30.8457	28.7057	27.4387	29.6706	27.809	28.4802	29.2685	30.2398	31.73	31.543	32.1468	31.3373	29.7684	23.883	30.0654	30.1658	31.4254	28.3581	30.5767	31.4371	31.7731	28.6831	31.3055	28.4476	26.2034	28.7555	28.4002	27.3714	27.8611	29.4106	29.388	31.6324	31.7461
P98095	Fibulin-2	FBLN2	27.956	29.0203	26.4282	27.7175	25.3907	25.8836	NaN	25.8418	NaN	NaN	23.4909	26.4205	27.4993	25.3531	27.3474	26.6294	28.0894	27.5097	27.6946	NaN	26.123	26.3353	27.2797	25.8625	25.757	27.5298	26.965	NaN	NaN	NaN	25.1491	NaN	NaN	27.8784	27.437	NaN	27.3598	27.1127	26.6802	27.5003	27.8691	NaN	26.9407	26.1495	27.1295	28.0735	25.6591
Q9UBX5	Fibulin-5	FBLN5	27.3799	28.3179	27.7786	27.82	26.9397	27.3047	26.4201	27.7986	27.6966	26.0511	26.622	25.9006	27.241	25.9605	26.886	26.1066	NaN	NaN	NaN	NaN	NaN	NaN	26.8387	25.3319	27.75	25.9696	25.412	NaN	25.2939	NaN	26.7548	25.1146	26.6417	27.6595	27.0313	25.7905	28.4895	NaN	NaN	NaN	NaN	NaN	NaN	NaN	NaN	25.8001	27.0965
Q53RD9	Fibulin-7	FBLN7	27.71	27.8356	28.8601	27.6897	27.6869	27.2307	27.7577	28.5607	28.7428	27.5896	27.4622	26.873	27.5754	27.6409	27.6518	28.0628	28.0779	27.8419	28.5717	28.3017	29.3081	29.0911	28.5703	28.5686	28.8648	28.5008	29.083	NaN	28.1463	29.1606	28.5926	28.2779	26.2707	NaN	28.5201	NaN	28.2079	27.989	28.7848	28.684	28.8548	30.3452	28.4315	28.0796	29.1022	28.7688	28.4854
P35555	Fibrillin-1	FBN1	31.3231	31.0609	30.1654	30.9789	29.8107	29.3494	28.978	29.0696	29.1811	29.33	28.3323	32.7515	32.4465	33.6523	33.3066	32.3372	32.2937	32.3573	31.8198	32.6192	32.0951	31.7191	31.2482	31.5696	31.4685	31.8167	30.1241	30.576	28.4799	27.2441	29.2332	29.4831	29.578	33.6166	32.6656	33.7005	33.3838	31.9531	32.4612	31.6783	31.494	32.3476	32.0017	31.6549	31.5261	30.9098	31.2379
P35556	Fibrillin-2	FBN2	NaN	NaN	NaN	NaN	25.4987	NaN	NaN	NaN	NaN	NaN	NaN	26.1406	NaN	NaN	NaN	NaN	NaN	NaN	NaN	NaN	NaN	NaN	NaN	NaN	NaN	NaN	NaN	NaN	NaN	NaN	NaN	NaN	NaN	NaN	NaN	NaN	NaN	NaN	NaN	NaN	NaN	NaN	NaN	NaN	25.6902	NaN	NaN
Q75N90	Fibrillin-3	FBN3	NaN	NaN	NaN	NaN	NaN	NaN	NaN	27.3919	NaN	NaN	NaN	NaN	NaN	NaN	NaN	NaN	NaN	NaN	NaN	26.8653	NaN	NaN	NaN	NaN	NaN	NaN	NaN	NaN	NaN	NaN	NaN	NaN	NaN	NaN	NaN	NaN	NaN	NaN	NaN	NaN	NaN	NaN	NaN	NaN	NaN	NaN	NaN
P09467	Fructose-1,6-bisphosphatase 1	FBP1	NaN	23.6132	24.5639	24.0813	NaN	NaN	NaN	NaN	NaN	NaN	NaN	NaN	NaN	NaN	NaN	NaN	NaN	NaN	NaN	NaN	NaN	NaN	NaN	NaN	24.8956	NaN	NaN	NaN	NaN	NaN	NaN	NaN	NaN	NaN	NaN	NaN	NaN	NaN	NaN	NaN	NaN	NaN	NaN	NaN	NaN	NaN	NaN
O00757	Fructose-1,6-bisphosphatase isozyme 2	FBP2	26.6745	NaN	NaN	26.6505	NaN	NaN	NaN	NaN	24.3637	NaN	NaN	NaN	NaN	NaN	NaN	25.3465	NaN	NaN	NaN	NaN	NaN	NaN	NaN	NaN	NaN	NaN	NaN	NaN	25.4044	NaN	NaN	NaN	NaN	NaN	NaN	NaN	NaN	NaN	NaN	NaN	NaN	NaN	NaN	NaN	NaN	NaN	NaN
Q9UK22	F-box only protein 2	FBXO2	NaN	23.989	26.058	NaN	25.1782	25.3942	NaN	NaN	24.74	NaN	NaN	28.4893	27.6509	29.3088	28.5882	27.4827	27.769	27.3641	27.7723	27.3631	26.7812	26.2957	25.8651	27.1062	28.0411	27.7075	27.1175	NaN	24.7281	26.3402	NaN	NaN	NaN	27.5105	27.6162	29.2175	28.545	28.2587	28.7878	27.7304	27.7861	27.0547	27.4414	26.9002	28.2594	27.1659	28.0204
Q9Y6R7	IgGFc-binding protein	FCGBP	NaN	NaN	NaN	NaN	NaN	NaN	NaN	NaN	NaN	NaN	NaN	NaN	NaN	NaN	NaN	NaN	NaN	NaN	NaN	NaN	NaN	NaN	NaN	NaN	NaN	NaN	NaN	NaN	NaN	NaN	24.5089	NaN	NaN	NaN	NaN	NaN	NaN	NaN	NaN	NaN	NaN	NaN	NaN	NaN	NaN	NaN	NaN
P08637;O75015	Low affinity immunoglobulin gamma Fc region receptor III-A;Low affinity immunoglobulin gamma Fc region receptor III-B	FCGR3A;FCGR3B	NaN	NaN	NaN	NaN	24.0751	NaN	NaN	NaN	NaN	NaN	NaN	NaN	NaN	NaN	NaN	NaN	NaN	NaN	NaN	NaN	NaN	NaN	NaN	NaN	NaN	NaN	NaN	NaN	NaN	NaN	NaN	NaN	NaN	NaN	NaN	NaN	NaN	NaN	NaN	NaN	NaN	NaN	NaN	NaN	NaN	NaN	NaN
P55899	IgG receptor FcRn large subunit p51	FCGRT	23.0194	NaN	NaN	NaN	NaN	NaN	NaN	NaN	NaN	NaN	NaN	NaN	NaN	NaN	NaN	NaN	NaN	NaN	NaN	NaN	NaN	NaN	NaN	NaN	NaN	NaN	NaN	NaN	NaN	NaN	NaN	NaN	NaN	NaN	NaN	NaN	NaN	NaN	NaN	NaN	NaN	NaN	NaN	NaN	NaN	NaN	NaN
Q15485	Ficolin-2	FCN2	25.2168	25.6804	26.7832	24.9829	27.4502	26.8459	NaN	26.8931	26.0954	25.5502	27.1166	NaN	NaN	NaN	NaN	NaN	NaN	NaN	NaN	NaN	NaN	NaN	NaN	24.6357	NaN	NaN	NaN	NaN	26.3417	26.5829	NaN	NaN	27.672	NaN	NaN	NaN	NaN	NaN	NaN	NaN	NaN	NaN	NaN	NaN	NaN	NaN	NaN
O75636	Ficolin-3	FCN3	26.2363	27.2897	28.2896	NaN	28.848	29.6192	28.6473	29.091	28.5358	27.3806	29.055	27.1505	NaN	NaN	NaN	NaN	25.498	NaN	26.4022	27.02	NaN	NaN	24.5476	25.5281	27.7038	NaN	25.6154	26.0616	28.3058	24.833	29.2886	27.4237	29.1052	24.1339	NaN	NaN	NaN	NaN	NaN	26.7626	26.2657	24.3234	26.0439	24.9583	NaN	NaN	25.9131
P14324	Farnesyl pyrophosphate synthase	FDPS	NaN	24.5026	NaN	23.3641	NaN	NaN	NaN	NaN	NaN	NaN	NaN	NaN	24.1859	NaN	NaN	NaN	NaN	NaN	NaN	NaN	NaN	NaN	NaN	NaN	NaN	NaN	NaN	NaN	NaN	NaN	NaN	NaN	NaN	NaN	NaN	NaN	NaN	NaN	NaN	NaN	NaN	NaN	NaN	NaN	NaN	NaN	NaN
P22830	Ferrochelatase, mitochondrial	FECH	NaN	NaN	NaN	NaN	NaN	NaN	NaN	NaN	NaN	NaN	NaN	NaN	NaN	NaN	NaN	NaN	NaN	NaN	NaN	NaN	NaN	NaN	NaN	NaN	NaN	NaN	NaN	NaN	NaN	NaN	NaN	NaN	NaN	NaN	NaN	NaN	NaN	NaN	NaN	NaN	NaN	NaN	NaN	NaN	NaN	NaN	NaN
Q96AC1	Fermitin family homolog 2	FERMT2	26.0475	26.9514	NaN	26.9345	NaN	25.0108	NaN	NaN	NaN	NaN	NaN	24.8305	25.8758	NaN	NaN	25.3038	NaN	25.2877	27.1887	NaN	NaN	NaN	25.6258	25.1341	25.0968	NaN	26.6693	NaN	NaN	NaN	NaN	NaN	NaN	NaN	25.0353	NaN	NaN	NaN	NaN	NaN	25.9654	NaN	NaN	NaN	NaN	NaN	NaN
Q86UX7	Fermitin family homolog 3	FERMT3	23.7075	24.5634	NaN	23.8226	NaN	NaN	NaN	NaN	NaN	NaN	NaN	NaN	NaN	NaN	NaN	NaN	NaN	NaN	NaN	NaN	NaN	NaN	NaN	NaN	NaN	NaN	NaN	NaN	NaN	NaN	NaN	NaN	NaN	NaN	NaN	NaN	NaN	NaN	NaN	NaN	NaN	NaN	NaN	NaN	NaN	NaN	NaN
Q9UGM5	Fetuin-B	FETUB	NaN	NaN	NaN	NaN	NaN	NaN	NaN	NaN	NaN	NaN	NaN	NaN	NaN	NaN	NaN	NaN	NaN	NaN	NaN	NaN	NaN	NaN	NaN	NaN	NaN	NaN	NaN	NaN	25.5915	NaN	NaN	NaN	NaN	NaN	NaN	NaN	NaN	NaN	NaN	NaN	NaN	NaN	NaN	NaN	NaN	NaN	NaN
P02671	Fibrinogen alpha chain;Fibrinopeptide A;Fibrinogen alpha chain	FGA	32.8406	34.4954	37.8186	32.0419	37.2273	37.063	35.7159	36.2721	35.8026	34.5932	36.3631	34.8899	30.186	28.2281	28.3523	23.593	27.6158	26.0168	23.2342	25.5303	25.8176	24.0672	32.858	35.9159	37.3101	33.7078	33.1322	33.3501	35.4375	34.0515	36.5285	33.8137	35.7844	28.5786	28.5311	25.3283	28.9145	26.5726	24.8112	26.0826	24.841	25.2132	25.2904	22.4515	30.6631	30.8736	36.641
P02675	Fibrinogen beta chain;Fibrinopeptide B;Fibrinogen beta chain	FGB	33.5623	34.8955	38.3825	33.3383	37.5937	37.4479	36.1311	36.6572	36.1737	35.4479	36.8698	36.7415	30.5208	28.6197	28.6536	25.6604	25.8011	25.7988	26.8404	25.1437	25.722	26.2015	33.2515	36.0671	37.9562	33.9469	33.4063	34.0875	35.9513	34.6533	37.3077	34.5256	36.4853	30.4808	29.4211	27.5617	29.0005	28.8646	25.9957	26.5495	25.8835	24.1479	24.9694	26.5088	30.4202	31.2801	37.0863
P09038	Fibroblast growth factor 2	FGF2	NaN	NaN	NaN	NaN	NaN	NaN	NaN	NaN	NaN	NaN	NaN	NaN	NaN	NaN	NaN	NaN	NaN	NaN	NaN	NaN	NaN	NaN	NaN	NaN	NaN	NaN	NaN	NaN	NaN	NaN	NaN	NaN	NaN	NaN	NaN	NaN	NaN	NaN	NaN	NaN	NaN	NaN	NaN	NaN	NaN	NaN	NaN
Q9BYJ0	Fibroblast growth factor-binding protein 2	FGFBP2	29.083	26.8571	30.9398	26.4507	31.8843	31.0499	31.504	30.6369	31.2513	31.9921	31.3185	32.9402	33.4358	34.0234	32.4477	33.7875	33.5019	33.3789	33.9261	33.7091	33.3043	33.298	31.8633	32.3392	31.8373	33.1358	33.522	33.6437	32.0266	33.1345	31.0194	32.9751	31.465	32.6611	32.9278	33.5023	32.6725	33.4338	32.3898	33.9718	33.6148	33.0655	32.8968	33.1165	33.8142	33.5335	32.5506
Q8N441	Fibroblast growth factor receptor-like 1	FGFRL1	NaN	NaN	NaN	NaN	NaN	NaN	NaN	NaN	NaN	NaN	NaN	NaN	NaN	NaN	NaN	NaN	NaN	NaN	NaN	NaN	NaN	NaN	NaN	NaN	NaN	NaN	NaN	NaN	NaN	NaN	NaN	NaN	NaN	NaN	NaN	NaN	NaN	NaN	NaN	NaN	NaN	NaN	NaN	NaN	NaN	NaN	NaN
P02679	Fibrinogen gamma chain	FGG	33.6175	34.9052	38.5949	33.4783	37.9149	37.5168	36.1909	36.8144	36.3604	35.5176	37.0209	35.649	30.967	28.5186	28.695	26.4787	23.2256	26.4528	27.4002	22.5005	NaN	24.4511	33.3343	35.9017	37.6558	34.1815	34.069	35.2726	35.997	34.9477	37.2201	34.4072	36.6461	30.4685	29.7037	24.9804	29.1336	27.6542	27.6218	29.0342	25.3448	26.7479	23.5432	26.7416	31.3694	32.0938	37.361
Q08830	Fibrinogen-like protein 1	FGL1	NaN	NaN	NaN	NaN	NaN	NaN	NaN	NaN	NaN	NaN	NaN	NaN	NaN	NaN	NaN	NaN	NaN	NaN	NaN	NaN	NaN	NaN	NaN	NaN	NaN	NaN	NaN	NaN	NaN	NaN	NaN	NaN	NaN	NaN	NaN	NaN	NaN	NaN	NaN	NaN	NaN	NaN	NaN	NaN	NaN	NaN	NaN
Q14314	Fibroleukin	FGL2	NaN	NaN	NaN	23.7341	NaN	NaN	NaN	NaN	NaN	NaN	NaN	NaN	NaN	NaN	NaN	NaN	NaN	NaN	NaN	NaN	NaN	NaN	NaN	NaN	NaN	NaN	NaN	NaN	NaN	NaN	NaN	NaN	NaN	NaN	NaN	NaN	NaN	NaN	NaN	NaN	NaN	NaN	NaN	NaN	NaN	NaN	NaN
P07954	Fumarate hydratase, mitochondrial	FH	27.1272	27.1542	NaN	28.7308	NaN	NaN	NaN	NaN	NaN	NaN	NaN	NaN	NaN	NaN	NaN	NaN	NaN	NaN	NaN	NaN	NaN	NaN	26.0732	NaN	NaN	NaN	NaN	NaN	NaN	NaN	24.3522	NaN	NaN	25.7705	NaN	NaN	24.2187	NaN	NaN	NaN	NaN	NaN	NaN	NaN	NaN	25.4033	NaN
Q13642	Four and a half LIM domains protein 1	FHL1	33.0983	29.955	26.7193	33.6875	26.6926	26.2277	24.4169	NaN	NaN	NaN	NaN	29.7182	30.3886	29.1727	30.4985	29.5161	29.9224	29.8496	30.3422	29.5073	29.3415	29.646	30.238	29.252	28.3386	29.1087	28.4166	27.8246	24.1542	25.5572	NaN	NaN	NaN	32.0258	29.9093	29.1643	30.5218	30.86	28.3016	28.7203	28.1401	29.1887	28.7388	27.3008	29.8612	29.7632	28.3399
Q14192	Four and a half LIM domains protein 2	FHL2	NaN	NaN	NaN	22.9887	NaN	NaN	NaN	NaN	NaN	NaN	NaN	NaN	NaN	NaN	NaN	NaN	NaN	NaN	NaN	NaN	NaN	NaN	NaN	NaN	NaN	NaN	NaN	NaN	NaN	NaN	NaN	NaN	NaN	NaN	NaN	NaN	NaN	NaN	NaN	NaN	NaN	NaN	NaN	NaN	NaN	NaN	NaN
Q13643	Four and a half LIM domains protein 3	FHL3	27.007	NaN	NaN	NaN	NaN	NaN	NaN	NaN	NaN	NaN	NaN	NaN	NaN	NaN	NaN	20.808	NaN	NaN	NaN	NaN	NaN	NaN	NaN	NaN	NaN	NaN	NaN	NaN	NaN	NaN	NaN	NaN	NaN	NaN	NaN	NaN	NaN	NaN	NaN	NaN	NaN	NaN	NaN	NaN	NaN	NaN	NaN
Q9Y613	FH1/FH2 domain-containing protein 1	FHOD1	21.5846	NaN	NaN	NaN	NaN	NaN	NaN	NaN	NaN	NaN	NaN	NaN	NaN	NaN	NaN	NaN	NaN	NaN	NaN	NaN	NaN	NaN	NaN	NaN	NaN	NaN	NaN	NaN	NaN	NaN	NaN	NaN	NaN	NaN	NaN	NaN	NaN	NaN	NaN	NaN	NaN	NaN	NaN	NaN	NaN	NaN	NaN
Q8TAL6	Fin bud initiation factor homolog	FIBIN	25.125	25.1275	26.165	NaN	26.3341	24.7232	24.7008	NaN	NaN	NaN	25.3097	23.6601	24.5647	NaN	NaN	NaN	NaN	NaN	NaN	NaN	NaN	NaN	25.903	25.1068	26.0972	26.9797	26.3772	NaN	25.7383	25.2143	26.5769	26.4036	26.3351	27.2511	NaN	NaN	NaN	NaN	NaN	NaN	26.0108	NaN	NaN	NaN	NaN	26.5126	26.4616
Q9Y3D6	Mitochondrial fission 1 protein	FIS1	23.6851	24.1544	NaN	24.5862	NaN	NaN	NaN	NaN	NaN	NaN	NaN	NaN	NaN	NaN	NaN	NaN	NaN	NaN	NaN	NaN	NaN	NaN	NaN	NaN	NaN	NaN	NaN	NaN	NaN	NaN	NaN	NaN	NaN	NaN	NaN	NaN	NaN	NaN	NaN	NaN	NaN	NaN	NaN	NaN	NaN	NaN	NaN
Q96AY3	Peptidyl-prolyl cis-trans isomerase FKBP10	FKBP10	25.3803	27.7262	NaN	23.0054	NaN	NaN	NaN	NaN	NaN	NaN	NaN	24.5171	24.6847	NaN	NaN	NaN	NaN	NaN	NaN	NaN	24.7017	23.6126	24.3654	NaN	NaN	NaN	NaN	NaN	NaN	NaN	NaN	NaN	NaN	NaN	NaN	NaN	25.8457	NaN	NaN	NaN	NaN	NaN	NaN	NaN	NaN	NaN	NaN
Q9NYL4	Peptidyl-prolyl cis-trans isomerase FKBP11	FKBP11	22.7843	NaN	NaN	NaN	NaN	NaN	NaN	NaN	NaN	NaN	NaN	NaN	NaN	NaN	NaN	NaN	NaN	NaN	NaN	NaN	NaN	NaN	NaN	NaN	NaN	NaN	NaN	NaN	NaN	NaN	NaN	NaN	NaN	NaN	NaN	NaN	NaN	NaN	NaN	NaN	NaN	NaN	NaN	NaN	NaN	NaN	NaN
Q5T1M5	FK506-binding protein 15	FKBP15	NaN	24.5926	NaN	24.3397	NaN	NaN	NaN	NaN	NaN	NaN	NaN	NaN	NaN	NaN	NaN	NaN	NaN	NaN	NaN	NaN	NaN	NaN	NaN	NaN	NaN	NaN	NaN	NaN	NaN	NaN	NaN	NaN	NaN	NaN	NaN	NaN	NaN	NaN	NaN	NaN	NaN	NaN	NaN	NaN	NaN	NaN	NaN
P62942	Peptidyl-prolyl cis-trans isomerase FKBP1A	FKBP1A	27.6369	27.3821	NaN	27.6822	NaN	NaN	NaN	NaN	NaN	NaN	NaN	24.8351	25.2791	NaN	NaN	NaN	NaN	NaN	NaN	NaN	NaN	NaN	27.3062	25.5212	24.9995	NaN	NaN	NaN	NaN	NaN	NaN	NaN	NaN	27.0281	NaN	NaN	NaN	NaN	NaN	NaN	NaN	NaN	NaN	NaN	NaN	NaN	NaN
P26885	Peptidyl-prolyl cis-trans isomerase FKBP2	FKBP2	26.0576	25.8854	NaN	26.2213	NaN	NaN	NaN	NaN	NaN	NaN	NaN	NaN	NaN	NaN	NaN	NaN	NaN	NaN	NaN	NaN	NaN	NaN	NaN	NaN	NaN	NaN	NaN	NaN	NaN	NaN	NaN	NaN	NaN	25.3814	NaN	NaN	NaN	NaN	NaN	NaN	NaN	NaN	NaN	NaN	NaN	25.5342	NaN
Q00688	Peptidyl-prolyl cis-trans isomerase FKBP3	FKBP3	27.0492	26.8856	NaN	27.4556	25.4537	NaN	NaN	NaN	NaN	NaN	NaN	NaN	26.4249	NaN	26.2797	25.3637	NaN	NaN	28.214	NaN	NaN	NaN	26.7782	NaN	NaN	26.4587	NaN	NaN	NaN	NaN	NaN	NaN	NaN	26.5541	NaN	NaN	27.5611	NaN	NaN	NaN	NaN	NaN	27.4558	NaN	NaN	NaN	NaN
Q02790	Peptidyl-prolyl cis-trans isomerase FKBP4;Peptidyl-prolyl cis-trans isomerase FKBP4, N-terminally processed	FKBP4	25.5292	25.9395	NaN	25.9025	NaN	NaN	NaN	NaN	NaN	NaN	NaN	NaN	NaN	NaN	NaN	NaN	NaN	NaN	NaN	NaN	NaN	NaN	NaN	NaN	NaN	NaN	NaN	NaN	NaN	NaN	NaN	NaN	NaN	NaN	NaN	NaN	NaN	NaN	NaN	NaN	NaN	NaN	NaN	NaN	NaN	NaN	NaN
Q13451	Peptidyl-prolyl cis-trans isomerase FKBP5;Peptidyl-prolyl cis-trans isomerase FKBP5, N-terminally processed	FKBP5	24.914	NaN	NaN	NaN	NaN	NaN	NaN	NaN	NaN	NaN	NaN	NaN	NaN	NaN	NaN	NaN	NaN	NaN	NaN	NaN	NaN	NaN	NaN	NaN	NaN	NaN	NaN	NaN	NaN	NaN	NaN	NaN	NaN	NaN	NaN	NaN	NaN	NaN	NaN	NaN	NaN	NaN	NaN	NaN	NaN	NaN	NaN
Q9Y680	Peptidyl-prolyl cis-trans isomerase FKBP7	FKBP7	24.6646	25.7668	NaN	24.8458	23.563	NaN	NaN	NaN	NaN	NaN	NaN	NaN	23.6435	NaN	NaN	NaN	NaN	NaN	NaN	NaN	NaN	NaN	NaN	NaN	NaN	NaN	NaN	NaN	NaN	NaN	NaN	NaN	NaN	NaN	NaN	NaN	NaN	NaN	NaN	NaN	NaN	NaN	NaN	NaN	23.7082	NaN	NaN
O95302	Peptidyl-prolyl cis-trans isomerase FKBP9	FKBP9	NaN	25.2183	NaN	NaN	NaN	NaN	NaN	NaN	NaN	NaN	NaN	NaN	NaN	NaN	NaN	NaN	NaN	NaN	NaN	NaN	NaN	NaN	NaN	NaN	NaN	NaN	NaN	NaN	NaN	NaN	NaN	NaN	NaN	NaN	NaN	NaN	NaN	NaN	NaN	NaN	NaN	NaN	NaN	NaN	NaN	NaN	NaN
CON__P20930;P20930	Filaggrin	FLG	NaN	NaN	NaN	NaN	NaN	NaN	NaN	NaN	NaN	NaN	NaN	NaN	NaN	NaN	NaN	NaN	NaN	NaN	NaN	NaN	NaN	20.1819	NaN	NaN	NaN	NaN	NaN	NaN	NaN	NaN	NaN	NaN	NaN	NaN	NaN	NaN	NaN	NaN	NaN	NaN	NaN	NaN	NaN	NaN	NaN	NaN	NaN
CON__Q5D862;Q5D862	Filaggrin-2	FLG2	NaN	NaN	25.1049	NaN	NaN	NaN	NaN	NaN	NaN	NaN	NaN	NaN	NaN	NaN	NaN	NaN	NaN	NaN	NaN	NaN	NaN	NaN	NaN	NaN	NaN	NaN	NaN	NaN	NaN	NaN	NaN	NaN	NaN	NaN	NaN	NaN	NaN	NaN	NaN	NaN	NaN	NaN	NaN	NaN	NaN	NaN	NaN
Q13045	Protein flightless-1 homolog	FLII	NaN	NaN	NaN	NaN	NaN	NaN	NaN	NaN	NaN	NaN	NaN	NaN	NaN	NaN	NaN	NaN	NaN	NaN	NaN	NaN	NaN	NaN	NaN	NaN	NaN	NaN	NaN	NaN	NaN	NaN	NaN	NaN	NaN	NaN	NaN	NaN	NaN	NaN	NaN	NaN	NaN	NaN	NaN	NaN	NaN	NaN	NaN
P21333	Filamin-A	FLNA	32.9662	33.7461	29.0169	33.5828	27.2395	28.5299	25.5518	26.0719	24.6685	28.184	23.135	25.3661	30.3522	24.8981	28.1639	27.3634	24.7943	27.5868	29.0453	25.7822	NaN	28.5304	32.764	29.1557	31.0142	26.4225	26.5084	26.1273	24.0002	NaN	26.7833	25.1188	24.9439	30.7222	29.9068	26.9207	30.9074	24.9464	27.3171	27.3195	27.6873	25.4937	25.6808	27.3405	27.4661	30.18	27.931
O75369	Filamin-B	FLNB	30.9512	30.5372	26.7208	31.2687	24.5523	26.4976	24.7889	25.6011	NaN	NaN	25.2182	25.0307	26.3121	26.1949	25.4371	28.2211	26.4512	26.676	23.9871	26.6118	23.9864	28.3357	29.4514	25.5639	26.9099	NaN	26.4955	NaN	27.1791	NaN	23.7342	25.5204	25.383	26.9639	24.7724	26.969	25.9409	NaN	26.2885	NaN	24.781	25.4195	25.199	25.5065	27.8006	26.5513	27.7019
Q14315	Filamin-C	FLNC	32.9126	26.7698	24.0367	33.0924	23.6085	24.1981	25.2443	24.0816	24.7593	NaN	NaN	25.5619	25.3918	24.1258	25.4405	25.31	24.2224	23.5799	23.3612	23.095	24.6561	25.603	25.9559	25.5764	24.6794	25.6699	25.3215	NaN	24.7507	24.5999	NaN	NaN	24.6693	27.7848	24.6577	25.6387	23.6241	25.5953	NaN	23.9597	25.0004	NaN	25.3086	NaN	25.334	23.4736	NaN
O75955	Flotillin-1	FLOT1	25.2028	24.4437	NaN	25.0014	NaN	NaN	NaN	NaN	NaN	NaN	NaN	NaN	NaN	NaN	NaN	NaN	NaN	NaN	NaN	NaN	NaN	NaN	23.681	NaN	NaN	NaN	NaN	NaN	NaN	NaN	NaN	NaN	NaN	NaN	NaN	NaN	NaN	NaN	NaN	NaN	NaN	NaN	NaN	NaN	NaN	NaN	NaN
Q14254	Flotillin-2	FLOT2	26.7767	24.5032	NaN	NaN	NaN	NaN	NaN	NaN	NaN	NaN	NaN	NaN	NaN	NaN	NaN	NaN	NaN	NaN	NaN	NaN	NaN	NaN	NaN	NaN	NaN	NaN	NaN	NaN	NaN	NaN	NaN	NaN	NaN	NaN	NaN	NaN	NaN	NaN	NaN	NaN	NaN	NaN	NaN	NaN	NaN	NaN	NaN
P17948	Vascular endothelial growth factor receptor 1	FLT1	24.5023	24.3707	26.8653	NaN	26.0007	27.1807	25.9279	28.0661	26.9243	27.1148	27.0171	25.3861	25.3123	25.7721	24.5284	26.3736	25.68	26.7174	26.3626	24.5331	25.5557	26.3502	26.6458	27.6826	26.9578	27.636	26.8479	NaN	26.9473	24.9032	25.7367	25.4837	26.9349	NaN	26.1055	NaN	NaN	NaN	NaN	25.3674	NaN	NaN	NaN	NaN	26.6134	26.2052	27.4584
Q06828	Fibromodulin	FMOD	36.2634	36.1649	35.0109	34.9284	36.8231	35.8399	34.9742	34.2524	34.0199	34.649	34.6048	37.8551	38.6577	37.4149	37.4866	36.9289	36.771	36.232	36.058	36.2293	35.8571	35.474	37.1978	37.0784	36.0414	36.6707	37.18	35.4107	35.3517	36.0398	34.3018	35.2141	34.1964	37.2749	38.6348	37.6879	37.2731	37.5357	35.8804	36.2426	35.9835	36.6212	36.0905	34.9783	37.236	37.5956	35.8766
P02751	Fibronectin;Anastellin;Ugl-Y1;Ugl-Y2;Ugl-Y3	FN1	37.0995	37.8213	39.7029	35.3206	39.6635	40.3871	40.5277	39.8595	39.7466	40.2601	40.7599	38.9201	37.1081	38.3878	37.0912	39.7895	38.5689	39.405	38.5507	39.3555	39.3564	40.0356	39.3941	40.0176	38.5607	39.7065	41.1146	40.4173	40.6719	40.4268	39.1858	39.8231	40.0416	36.3211	37.4424	38.859	36.721	37.7443	37.5908	38.7173	38.4941	38.8094	38.6706	39.0633	40.6539	39.32	40.7672
Q9HA64	Ketosamine-3-kinase	FN3KRP	22.6385	NaN	NaN	NaN	NaN	NaN	NaN	NaN	NaN	NaN	NaN	NaN	NaN	NaN	NaN	NaN	NaN	NaN	NaN	NaN	NaN	NaN	NaN	NaN	NaN	NaN	NaN	NaN	NaN	NaN	NaN	NaN	NaN	NaN	NaN	NaN	NaN	NaN	NaN	NaN	NaN	NaN	NaN	NaN	NaN	NaN	NaN
Q4ZHG4	Fibronectin type III domain-containing protein 1	FNDC1	29.8617	30.6606	28.6625	29.4658	30.3289	28.7823	29.8599	29.4452	29.5009	29.6002	29.1921	32.2683	32.0961	32.0367	31.64	32.9871	33.1326	33.1624	32.5204	32.0844	33.0141	32.8473	30.7644	30.6005	26.0735	30.4408	31.2342	30.5203	30.0371	30.8836	28.5322	30.4655	29.1249	31.3721	32.4542	31.3753	32.5085	32.836	33.4616	32.9779	32.2052	32.3359	33.1377	32.4011	31.0014	30.997	30.5256
P49354	Protein farnesyltransferase/geranylgeranyltransferase type-1 subunit alpha	FNTA	NaN	22.8442	NaN	NaN	NaN	NaN	NaN	NaN	NaN	NaN	NaN	NaN	NaN	NaN	NaN	NaN	NaN	NaN	NaN	NaN	NaN	NaN	NaN	NaN	NaN	NaN	NaN	NaN	NaN	NaN	NaN	NaN	NaN	NaN	NaN	NaN	NaN	NaN	NaN	NaN	NaN	NaN	NaN	NaN	NaN	NaN	NaN
P14207	Folate receptor beta	FOLR2	NaN	23.9442	NaN	NaN	NaN	NaN	NaN	NaN	NaN	NaN	NaN	NaN	NaN	NaN	NaN	NaN	NaN	NaN	NaN	NaN	NaN	NaN	NaN	NaN	NaN	NaN	NaN	NaN	NaN	NaN	NaN	NaN	NaN	NaN	NaN	NaN	NaN	NaN	NaN	NaN	NaN	NaN	NaN	NaN	NaN	NaN	NaN
P15408	Fos-related antigen 2	FOSL2	NaN	21.7346	NaN	NaN	NaN	NaN	NaN	NaN	NaN	NaN	NaN	NaN	NaN	NaN	NaN	NaN	NaN	NaN	NaN	NaN	NaN	NaN	NaN	NaN	NaN	NaN	NaN	NaN	NaN	NaN	NaN	NaN	NaN	NaN	NaN	NaN	NaN	NaN	NaN	NaN	NaN	NaN	NaN	NaN	NaN	NaN	NaN
Q92765	Secreted frizzled-related protein 3	FRZB	27.3005	26.2944	27.9047	NaN	28.1834	27.4939	27.4076	NaN	NaN	NaN	27.9379	29.0819	29.0158	28.9175	28.068	30.7761	31.0784	31.7101	31.4802	30.7682	31.4369	31.4114	27.0316	28.6801	27.8852	30.3768	28.8296	29.9091	27.1703	29.6662	27.156	28.2515	26.2406	27.6525	29.6805	29.2803	29.253	30.5693	29.6976	31.0575	30.6759	30.8588	31.2377	30.7663	29.7434	29.948	28.246
Q16658	Fascin	FSCN1	28.1654	29.313	25.6937	27.9208	25.4119	26.028	24.9384	25.5518	NaN	NaN	22.9337	26.5101	27.2715	27.3277	27.3347	27.071	26.4374	27.0197	NaN	25.9164	26.3892	27.4803	28.5584	26.8609	27.2894	27.08	26.3135	24.6393	23.9407	NaN	24.3019	NaN	NaN	27.6176	26.5382	25.9326	28.1786	27.6235	NaN	26.3676	21.9364	23.2775	25.8186	27.0062	26.5512	27.4194	27.0683
Q12841	Follistatin-related protein 1	FSTL1	NaN	24.1643	NaN	NaN	25.5078	NaN	27.2661	NaN	25.3693	26.8387	26.7179	25.1236	NaN	NaN	NaN	28.2281	27.6417	28.2029	27.706	27.9811	28.6373	28.7813	NaN	NaN	NaN	NaN	26.3776	26.1385	26.5318	27.6623	NaN	26.4123	NaN	NaN	25.7978	NaN	26.3265	26.3145	26.7132	28.0218	28.06	27.5428	28.1599	28.3398	NaN	24.3233	27.1582
O95633	Follistatin-related protein 3	FSTL3	NaN	NaN	NaN	NaN	NaN	NaN	24.7927	NaN	NaN	NaN	NaN	NaN	NaN	NaN	NaN	26.6125	NaN	NaN	NaN	27.1169	NaN	26.827	NaN	NaN	NaN	NaN	NaN	NaN	24.975	NaN	NaN	NaN	NaN	NaN	NaN	NaN	NaN	NaN	NaN	NaN	25.4264	NaN	NaN	NaN	NaN	NaN	NaN
P02794	Ferritin heavy chain;Ferritin heavy chain, N-terminally processed	FTH1	29.465	30.0513	30.0666	30.4699	29.1035	29.442	28.4296	28.9049	28.9555	29.3879	28.7082	29.7903	29.8284	30.8871	29.5002	29.8854	29.6266	29.4399	28.824	29.6636	29.019	29.342	29.5454	29.9485	30.4505	30.4656	30.4315	30.3024	29.3976	28.9171	29.0139	29.6952	28.2935	29.1579	29.5562	29.6245	28.5169	28.8513	29.6092	27.7416	28.2852	29.2365	28.4899	28.7255	30.6698	29.9915	30.7819
P02792	Ferritin light chain	FTL	30.0495	31.6462	31.0262	30.6251	30.2824	30.8734	30.8453	29.711	30.2999	30.3196	30.2636	30.7584	30.5289	30.7031	28.8421	30.7762	30.0012	29.8139	30.7007	30.6705	29.5077	30.3668	30.3779	31.1559	32.1009	30.9873	31.2263	30.9283	30.5815	31.1221	30.5911	31.4233	30.3946	29.9449	30.7541	29.9441	30.2348	30.0377	29.7599	29.1664	30.3829	30.1158	31.0139	29.8293	31.7837	30.7073	30.869
Q96AE4	Far upstream element-binding protein 1	FUBP1	23.665	25.2018	NaN	25.1303	NaN	NaN	NaN	NaN	NaN	NaN	NaN	NaN	NaN	NaN	NaN	NaN	NaN	NaN	NaN	NaN	NaN	NaN	NaN	NaN	NaN	NaN	NaN	NaN	NaN	NaN	NaN	NaN	NaN	NaN	NaN	NaN	NaN	NaN	NaN	NaN	NaN	NaN	NaN	NaN	NaN	NaN	NaN
P04066	Tissue alpha-L-fucosidase	FUCA1	24.6694	25.0511	24.4241	NaN	NaN	NaN	NaN	NaN	NaN	NaN	NaN	NaN	NaN	NaN	24.3994	NaN	NaN	NaN	NaN	NaN	NaN	NaN	NaN	NaN	NaN	NaN	NaN	NaN	NaN	NaN	NaN	NaN	NaN	NaN	NaN	NaN	NaN	NaN	NaN	NaN	NaN	NaN	NaN	NaN	NaN	NaN	NaN
Q9BTY2	Plasma alpha-L-fucosidase	FUCA2	NaN	NaN	NaN	NaN	NaN	NaN	NaN	NaN	NaN	NaN	NaN	NaN	NaN	NaN	NaN	NaN	NaN	NaN	NaN	NaN	NaN	NaN	NaN	NaN	NaN	NaN	NaN	NaN	NaN	NaN	NaN	NaN	NaN	NaN	NaN	NaN	NaN	NaN	NaN	NaN	NaN	NaN	NaN	NaN	NaN	NaN	22.6544
P09958	Furin	FURIN	NaN	NaN	NaN	NaN	NaN	NaN	NaN	NaN	NaN	NaN	NaN	NaN	NaN	NaN	NaN	NaN	NaN	NaN	NaN	NaN	NaN	NaN	NaN	NaN	NaN	NaN	NaN	NaN	20.2959	NaN	NaN	NaN	NaN	NaN	NaN	NaN	NaN	NaN	NaN	NaN	NaN	NaN	NaN	NaN	NaN	NaN	NaN
P35637;Q92804	RNA-binding protein FUS;TATA-binding protein-associated factor 2N	FUS;TAF15	25.6288	26.6751	NaN	26.9172	NaN	NaN	NaN	NaN	NaN	NaN	NaN	NaN	NaN	NaN	NaN	NaN	NaN	NaN	NaN	NaN	NaN	NaN	NaN	NaN	NaN	NaN	NaN	NaN	NaN	NaN	NaN	NaN	NaN	NaN	NaN	NaN	NaN	NaN	NaN	NaN	NaN	NaN	NaN	NaN	NaN	NaN	NaN
O00168	Phospholemman	FXYD1	NaN	NaN	NaN	NaN	NaN	NaN	NaN	NaN	NaN	NaN	NaN	NaN	NaN	NaN	NaN	NaN	NaN	NaN	NaN	NaN	NaN	NaN	NaN	NaN	NaN	NaN	NaN	NaN	NaN	NaN	NaN	NaN	NaN	NaN	NaN	NaN	NaN	NaN	NaN	NaN	NaN	NaN	NaN	NaN	NaN	NaN	NaN
Q9H0Q3	FXYD domain-containing ion transport regulator 6	FXYD6	NaN	NaN	NaN	NaN	NaN	NaN	NaN	NaN	NaN	NaN	NaN	NaN	NaN	NaN	NaN	NaN	NaN	NaN	NaN	NaN	NaN	NaN	NaN	NaN	NaN	NaN	NaN	25.6727	NaN	25.7692	NaN	NaN	NaN	NaN	NaN	NaN	NaN	NaN	NaN	NaN	NaN	NaN	NaN	NaN	NaN	NaN	NaN
Q13283	Ras GTPase-activating protein-binding protein 1	G3BP1	NaN	25.8428	NaN	NaN	NaN	NaN	NaN	NaN	NaN	NaN	NaN	NaN	NaN	NaN	NaN	NaN	NaN	NaN	NaN	NaN	NaN	NaN	NaN	NaN	NaN	NaN	NaN	NaN	NaN	NaN	NaN	NaN	NaN	NaN	NaN	NaN	NaN	NaN	NaN	NaN	NaN	NaN	NaN	NaN	NaN	NaN	NaN
Q9UN86	Ras GTPase-activating protein-binding protein 2	G3BP2	20.9244	NaN	NaN	NaN	NaN	NaN	NaN	NaN	NaN	NaN	NaN	NaN	NaN	NaN	NaN	NaN	NaN	NaN	NaN	NaN	NaN	NaN	NaN	NaN	NaN	NaN	NaN	NaN	NaN	NaN	NaN	NaN	NaN	NaN	NaN	NaN	NaN	NaN	NaN	NaN	NaN	NaN	NaN	NaN	NaN	NaN	NaN
P11413	Glucose-6-phosphate 1-dehydrogenase	G6PD	27.078	26.6183	NaN	27.6236	NaN	NaN	NaN	NaN	NaN	NaN	NaN	27.5411	NaN	NaN	NaN	NaN	NaN	NaN	NaN	29.694	NaN	27.8123	26.281	NaN	27.7253	NaN	NaN	NaN	NaN	NaN	NaN	NaN	NaN	NaN	NaN	NaN	NaN	NaN	NaN	NaN	NaN	NaN	NaN	NaN	26.7179	NaN	NaN
P10253	Lysosomal alpha-glucosidase;76 kDa lysosomal alpha-glucosidase;70 kDa lysosomal alpha-glucosidase	GAA	26.6075	27.7811	25.7294	26.3245	25.738	25.7872	NaN	25.5804	25.7045	26.8404	25.2545	25.1476	24.777	NaN	25.8192	25.753	NaN	26.7041	NaN	NaN	NaN	NaN	27.2903	27.2959	26.4328	27.4664	27.2378	NaN	25.1065	25.8665	NaN	26.0306	NaN	25.7017	25.84	NaN	NaN	25.6488	NaN	NaN	NaN	NaN	NaN	25.3692	26.8059	27.2843	26.0611
Q14376	UDP-glucose 4-epimerase	GALE	NaN	25.0129	NaN	25.252	NaN	NaN	NaN	NaN	NaN	NaN	25.6943	24.3332	NaN	NaN	NaN	24.3912	NaN	NaN	NaN	NaN	NaN	NaN	NaN	NaN	NaN	NaN	NaN	NaN	NaN	NaN	NaN	NaN	NaN	NaN	NaN	NaN	NaN	NaN	NaN	NaN	NaN	NaN	NaN	NaN	NaN	NaN	NaN
P51570	Galactokinase	GALK1	25.2275	25.7696	NaN	25.2095	NaN	NaN	NaN	NaN	NaN	NaN	NaN	25.4571	25.8236	NaN	NaN	NaN	NaN	NaN	NaN	NaN	NaN	25.6322	NaN	NaN	27.1025	NaN	NaN	NaN	NaN	NaN	NaN	NaN	NaN	NaN	NaN	NaN	NaN	NaN	NaN	NaN	NaN	NaN	NaN	NaN	NaN	NaN	NaN
Q96C23	Aldose 1-epimerase	GALM	24.8416	25.4384	NaN	24.9251	NaN	NaN	NaN	NaN	NaN	NaN	NaN	24.0923	24.4411	25.0001	NaN	NaN	NaN	NaN	NaN	NaN	NaN	NaN	24.1677	23.8055	NaN	NaN	NaN	NaN	NaN	NaN	NaN	NaN	NaN	NaN	NaN	NaN	25.0778	NaN	NaN	NaN	NaN	NaN	NaN	NaN	NaN	NaN	NaN
P34059	N-acetylgalactosamine-6-sulfatase	GALNS	NaN	NaN	NaN	NaN	NaN	NaN	NaN	NaN	NaN	NaN	NaN	NaN	NaN	NaN	NaN	NaN	NaN	NaN	NaN	NaN	NaN	NaN	NaN	NaN	NaN	NaN	NaN	NaN	NaN	NaN	NaN	NaN	NaN	NaN	NaN	26.8411	NaN	NaN	NaN	NaN	NaN	NaN	NaN	NaN	NaN	NaN	NaN
Q10472	Polypeptide N-acetylgalactosaminyltransferase 1;Polypeptide N-acetylgalactosaminyltransferase 1 soluble form	GALNT1	NaN	NaN	NaN	NaN	NaN	NaN	NaN	23.9965	NaN	NaN	NaN	NaN	24.7276	NaN	NaN	25.1467	24.9818	26.041	NaN	NaN	25.9119	26.2696	NaN	25.2239	NaN	NaN	NaN	NaN	NaN	NaN	NaN	NaN	NaN	NaN	26.1915	NaN	NaN	NaN	NaN	NaN	NaN	NaN	NaN	26.2829	NaN	NaN	NaN
Q8N428	Polypeptide N-acetylgalactosaminyltransferase 16	GALNT16	NaN	NaN	25.1473	NaN	25.1973	24.8055	25.7475	25.6088	NaN	NaN	NaN	24.4079	NaN	NaN	NaN	NaN	NaN	NaN	NaN	NaN	NaN	NaN	NaN	25.61	25.3872	NaN	26.2174	NaN	25.0059	24.3168	NaN	25.4164	24.8921	NaN	NaN	NaN	NaN	NaN	NaN	NaN	NaN	NaN	NaN	NaN	25.0875	25.0451	NaN
Q6P9A2	Polypeptide N-acetylgalactosaminyltransferase 18	GALNT18	NaN	NaN	NaN	NaN	24.447	24.4787	NaN	NaN	NaN	NaN	NaN	NaN	NaN	NaN	NaN	25.3491	25.0552	NaN	NaN	NaN	25.2961	25.1736	NaN	NaN	NaN	NaN	24.9962	25.8832	24.7233	NaN	NaN	24.4656	24.8198	NaN	NaN	NaN	NaN	NaN	NaN	NaN	NaN	NaN	NaN	NaN	25.0634	24.7109	NaN
Q10471	Polypeptide N-acetylgalactosaminyltransferase 2;Polypeptide N-acetylgalactosaminyltransferase 2 soluble form	GALNT2	26.3103	27.2761	28.2535	26.3704	27.9503	27.5934	28.0258	29.8443	28.9779	29.4652	28.0808	28.0945	27.761	27.3843	27.2903	29.3323	28.6174	29.233	28.1886	29.0016	29.3915	29.0991	28.4297	29.4324	NaN	29.8186	29.1858	29.9725	28.3342	28.8919	28.2689	29.4933	26.5916	NaN	27.9287	NaN	NaN	29.4031	29.7368	29.4967	33.1176	30.8025	28.5366	29.0866	29.2477	28.9678	28.3885
Q7Z7M9	Polypeptide N-acetylgalactosaminyltransferase 5	GALNT5	NaN	NaN	NaN	NaN	NaN	NaN	24.574	NaN	NaN	NaN	NaN	NaN	NaN	NaN	NaN	25.916	NaN	26.2313	NaN	24.673	NaN	25.4793	NaN	NaN	NaN	NaN	NaN	NaN	24.9542	NaN	NaN	NaN	25.0807	NaN	NaN	NaN	NaN	NaN	26.4407	NaN	NaN	NaN	NaN	NaN	NaN	NaN	NaN
Q86SF2	N-acetylgalactosaminyltransferase 7	GALNT7	NaN	NaN	NaN	NaN	NaN	NaN	NaN	NaN	NaN	NaN	NaN	NaN	NaN	NaN	NaN	NaN	NaN	NaN	NaN	NaN	NaN	NaN	NaN	NaN	NaN	NaN	NaN	NaN	NaN	NaN	NaN	NaN	NaN	NaN	NaN	NaN	NaN	NaN	NaN	NaN	NaN	NaN	NaN	NaN	NaN	NaN	NaN
Q14353	Guanidinoacetate N-methyltransferase	GAMT	24.7092	NaN	NaN	26.0106	NaN	NaN	NaN	NaN	NaN	NaN	NaN	NaN	NaN	NaN	NaN	NaN	NaN	NaN	NaN	NaN	NaN	NaN	NaN	NaN	NaN	NaN	NaN	NaN	NaN	NaN	NaN	NaN	NaN	NaN	NaN	NaN	NaN	NaN	NaN	NaN	NaN	NaN	NaN	NaN	NaN	NaN	NaN
Q14697	Neutral alpha-glucosidase AB	GANAB	28.6537	29.4204	28.1739	27.5342	28.2807	28.4193	28.1611	28.1706	27.6688	28.6531	27.7903	28.1351	28.2502	28.0194	27.3309	29.0826	28.0468	28.7787	27.6862	28.7563	28.2148	28.5134	28.8807	29.2431	28.9758	29.3466	29.4597	29.5631	28.1409	28.8168	28.0472	28.3992	28.1344	27.9348	28.3717	28.5103	28.4754	28.9121	28.4522	27.9911	28.6762	28.7455	28.6752	27.5966	30.0222	29.5141	29.3823
P04406	Glyceraldehyde-3-phosphate dehydrogenase	GAPDH	34.4075	33.463	31.3281	34.4627	31.627	31.6254	30.6809	31.2658	30.5835	30.5986	30.0108	32.8923	33.5304	32.9572	33.6517	32.2952	32.0907	32.5576	32.3133	32.1977	31.7802	31.8984	32.861	32.2015	32.0185	32.2342	31.6674	29.9598	30.4405	31.1676	30.6666	30.5047	29.6387	33.2019	33.0679	32.8595	33.5966	32.7649	32.6611	32.4675	31.8746	32.1336	32.2241	31.7357	32.399	32.1855	32.2409
P41250	Glycine--tRNA ligase	GARS	24.4087	26.3672	NaN	23.4878	NaN	NaN	NaN	NaN	NaN	NaN	NaN	23.0336	NaN	NaN	NaN	NaN	NaN	25.4719	NaN	25.2964	NaN	NaN	25.0566	NaN	NaN	NaN	NaN	NaN	NaN	NaN	NaN	NaN	NaN	NaN	NaN	25.6883	NaN	NaN	NaN	NaN	24.1914	NaN	NaN	NaN	NaN	NaN	NaN
P22102	Trifunctional purine biosynthetic protein adenosine-3;Phosphoribosylamine--glycine ligase;Phosphoribosylformylglycinamidine cyclo-ligase;Phosphoribosylglycinamide formyltransferase	GART	23.4256	NaN	NaN	NaN	NaN	NaN	NaN	NaN	NaN	NaN	NaN	NaN	NaN	NaN	NaN	NaN	NaN	NaN	NaN	NaN	NaN	NaN	NaN	NaN	NaN	NaN	NaN	NaN	NaN	NaN	NaN	NaN	NaN	NaN	NaN	NaN	NaN	NaN	NaN	NaN	NaN	NaN	NaN	NaN	NaN	NaN	NaN
P54826	Growth arrest-specific protein 1	GAS1	NaN	NaN	24.5036	NaN	NaN	NaN	NaN	NaN	NaN	NaN	NaN	NaN	NaN	NaN	25.4547	NaN	NaN	NaN	NaN	NaN	26.4126	NaN	NaN	NaN	NaN	25.4793	NaN	NaN	NaN	NaN	NaN	NaN	NaN	NaN	NaN	NaN	NaN	NaN	NaN	NaN	NaN	NaN	NaN	NaN	NaN	NaN	NaN
Q14393	Growth arrest-specific protein 6	GAS6	NaN	NaN	NaN	NaN	NaN	NaN	NaN	NaN	NaN	NaN	NaN	NaN	NaN	NaN	NaN	NaN	NaN	NaN	NaN	NaN	NaN	NaN	NaN	NaN	NaN	NaN	NaN	NaN	NaN	NaN	NaN	NaN	NaN	NaN	NaN	NaN	NaN	NaN	NaN	NaN	NaN	NaN	NaN	NaN	NaN	24.6074	NaN
O60861	Growth arrest-specific protein 7	GAS7	NaN	NaN	NaN	NaN	NaN	NaN	NaN	NaN	NaN	NaN	NaN	NaN	NaN	NaN	NaN	NaN	NaN	NaN	NaN	NaN	NaN	NaN	NaN	NaN	NaN	NaN	NaN	NaN	NaN	NaN	NaN	NaN	20.821	NaN	NaN	NaN	NaN	NaN	NaN	NaN	NaN	NaN	NaN	NaN	NaN	NaN	NaN
P50440	Glycine amidinotransferase, mitochondrial	GATM	24.3945	23.7412	NaN	25.1281	NaN	NaN	NaN	NaN	NaN	NaN	NaN	NaN	NaN	NaN	NaN	NaN	NaN	NaN	NaN	NaN	NaN	NaN	NaN	NaN	NaN	NaN	NaN	NaN	NaN	NaN	NaN	NaN	NaN	NaN	NaN	NaN	NaN	NaN	NaN	NaN	NaN	NaN	NaN	NaN	NaN	NaN	NaN
P04062	Glucosylceramidase	GBA	23.6172	23.8843	24.9818	NaN	25.1251	25.8243	24.0813	25.6401	NaN	23.3545	23.8969	24.8872	NaN	NaN	24.211	26.6929	24.7952	25.1708	NaN	NaN	NaN	NaN	24.975	26.121	NaN	26.3502	25.8177	NaN	24.5974	25.1989	25.0075	25.5166	24.1999	NaN	NaN	NaN	NaN	NaN	NaN	NaN	27.0858	NaN	NaN	NaN	26.3256	25.4888	25.5468
O75323	Protein NipSnap homolog 2	GBAS	25.8885	NaN	NaN	26.114	NaN	NaN	NaN	NaN	NaN	NaN	NaN	NaN	NaN	NaN	NaN	NaN	NaN	NaN	NaN	NaN	NaN	NaN	NaN	NaN	NaN	NaN	NaN	NaN	NaN	NaN	NaN	NaN	NaN	NaN	NaN	NaN	NaN	NaN	NaN	NaN	NaN	NaN	NaN	NaN	NaN	NaN	NaN
Q04446	1,4-alpha-glucan-branching enzyme	GBE1	25.5281	25.9974	NaN	24.7807	24.2758	25.1161	NaN	NaN	NaN	NaN	NaN	25.7635	26.5553	25.6986	25.1612	NaN	25.8773	25.2989	NaN	NaN	NaN	24.1684	NaN	25.2785	25.8057	NaN	24.4848	NaN	NaN	NaN	NaN	NaN	NaN	25.8546	26.241	NaN	NaN	NaN	26.3467	NaN	NaN	NaN	NaN	24.3228	25.5972	24.7055	25.3586
P32456;P32455	Interferon-induced guanylate-binding protein 2;Interferon-induced guanylate-binding protein 1	GBP2;GBP1	NaN	NaN	NaN	NaN	NaN	NaN	NaN	NaN	NaN	NaN	NaN	NaN	NaN	NaN	NaN	NaN	NaN	NaN	NaN	NaN	NaN	NaN	NaN	NaN	NaN	NaN	NaN	NaN	NaN	NaN	NaN	NaN	NaN	NaN	NaN	NaN	NaN	NaN	NaN	NaN	NaN	NaN	NaN	NaN	NaN	NaN	NaN
P02774	Vitamin D-binding protein	GC	32.898	33.0143	32.9748	32.7903	34.1312	33.4939	34.8771	33.6003	34.1309	34.5175	34.8045	32.4051	28.8512	28.4635	26.866	NaN	NaN	23.5757	NaN	NaN	NaN	NaN	31.9244	32.2247	32.3271	32.2462	33.8973	33.6186	34.5377	33.9896	33.3382	34.1133	33.9604	31.003	28.4572	NaN	28.9057	28.3664	27.8192	27.6091	23.8498	22.9929	19.3876	NaN	29.6825	31.5038	29.7112
P30047	GTP cyclohydrolase 1 feedback regulatory protein	GCHFR	NaN	NaN	NaN	22.2724	NaN	NaN	NaN	NaN	NaN	NaN	NaN	NaN	NaN	NaN	NaN	NaN	NaN	NaN	NaN	NaN	NaN	NaN	NaN	NaN	NaN	NaN	NaN	NaN	NaN	NaN	NaN	NaN	NaN	NaN	NaN	NaN	NaN	NaN	NaN	NaN	NaN	NaN	NaN	NaN	NaN	NaN	NaN
P48506	Glutamate--cysteine ligase catalytic subunit	GCLC	NaN	NaN	NaN	NaN	NaN	NaN	NaN	NaN	NaN	NaN	NaN	NaN	NaN	NaN	NaN	NaN	NaN	NaN	NaN	NaN	NaN	NaN	NaN	NaN	NaN	NaN	NaN	NaN	NaN	NaN	NaN	NaN	NaN	NaN	NaN	NaN	23.8984	NaN	NaN	NaN	NaN	NaN	NaN	NaN	NaN	NaN	NaN
P48507	Glutamate--cysteine ligase regulatory subunit	GCLM	NaN	NaN	NaN	23.0465	NaN	NaN	NaN	NaN	NaN	NaN	NaN	NaN	NaN	NaN	NaN	NaN	NaN	NaN	NaN	NaN	NaN	NaN	NaN	NaN	NaN	NaN	NaN	NaN	NaN	NaN	NaN	NaN	NaN	NaN	NaN	NaN	NaN	NaN	NaN	NaN	NaN	NaN	NaN	NaN	NaN	NaN	NaN
P23434	Glycine cleavage system H protein, mitochondrial	GCSH	23.8956	NaN	NaN	24.4212	NaN	NaN	NaN	NaN	NaN	NaN	NaN	NaN	NaN	NaN	NaN	NaN	NaN	NaN	NaN	NaN	NaN	NaN	NaN	NaN	NaN	NaN	NaN	NaN	NaN	NaN	NaN	NaN	NaN	NaN	NaN	NaN	NaN	NaN	NaN	NaN	NaN	NaN	NaN	NaN	NaN	NaN	NaN
P55107	Growth/differentiation factor 10	GDF10	24.6704	NaN	27.3346	NaN	23.8499	NaN	27.3403	NaN	NaN	NaN	24.7187	NaN	NaN	NaN	NaN	NaN	NaN	25.5901	NaN	NaN	NaN	NaN	26.8994	27.9895	29.2085	27.9499	25.6892	NaN	25.6323	26.7204	26.3003	26.4728	NaN	NaN	NaN	NaN	NaN	NaN	NaN	NaN	NaN	NaN	NaN	NaN	27.7042	27.0337	25.7608
Q99988	Growth/differentiation factor 15	GDF15	NaN	NaN	NaN	NaN	NaN	NaN	NaN	22.8858	NaN	NaN	NaN	NaN	NaN	NaN	NaN	NaN	NaN	NaN	NaN	NaN	NaN	NaN	NaN	NaN	NaN	NaN	NaN	NaN	NaN	NaN	NaN	NaN	NaN	NaN	NaN	NaN	NaN	NaN	NaN	NaN	NaN	NaN	NaN	NaN	NaN	NaN	NaN
P43026	Growth/differentiation factor 5	GDF5	NaN	NaN	25.1367	NaN	24.0495	24.7013	25.9208	NaN	NaN	NaN	NaN	24.6233	NaN	24.9696	NaN	25.8341	25.5199	25.4781	25.06	25.0207	NaN	26.5171	NaN	25.8049	24.2621	26.2996	26.4412	NaN	25.2368	24.9936	NaN	25.9163	NaN	NaN	NaN	NaN	NaN	NaN	25.9479	NaN	NaN	NaN	NaN	NaN	26.3917	26.0177	25.9323
Q6KF10	Growth/differentiation factor 6	GDF6	NaN	NaN	26.9971	NaN	26.9944	26.6717	26.5143	26.8855	NaN	27.5144	27.0256	26.5235	26.1269	NaN	NaN	NaN	27.9112	NaN	26.9059	26.9485	NaN	27.4452	26.5848	26.754	26.5472	26.6186	26.9535	NaN	27.5671	26.7647	27.1949	27.1772	26.5674	NaN	27.5254	NaN	NaN	NaN	NaN	NaN	NaN	26.954	NaN	NaN	27.0153	25.8983	28.6249
P31150	Rab GDP dissociation inhibitor alpha	GDI1	27.2932	27.3688	25.4931	27.5001	25.6693	25.2852	26.7469	NaN	NaN	NaN	23.2637	26.3191	26.374	27.4396	27.1236	26.7321	26.2935	27.0118	26.742	NaN	25.5568	26.2207	26.2113	25.7864	26.3472	25.9265	NaN	NaN	NaN	NaN	24.8748	NaN	25.1455	27.1952	26.3926	NaN	26.8691	26.5816	27.9137	NaN	NaN	NaN	27.8371	26.0616	26.6979	27.3042	26.7064
P50395	Rab GDP dissociation inhibitor beta	GDI2	30.1269	30.5995	27.4071	30.3695	27.1954	26.8516	25.2986	25.62	27.4583	26.3789	25.9816	27.437	29.2208	29.0349	28.7524	28.0151	27.4148	27.5298	25.427	24.5594	27.9956	27.8106	29.2554	27.74	27.7523	26.9854	25.3025	26.5558	25.8449	26.9183	26.175	25.9339	23.9298	28.3801	28.2423	27.6283	28.9767	27.2632	27.1108	26.9283	26.7727	NaN	NaN	27.039	27.5199	28.7936	27.6239
P14136	Glial fibrillary acidic protein	GFAP	27.0092	26.0458	NaN	26.3671	25.574	NaN	NaN	NaN	NaN	NaN	NaN	NaN	NaN	NaN	NaN	NaN	NaN	NaN	NaN	NaN	NaN	NaN	24.4908	NaN	NaN	NaN	NaN	NaN	NaN	NaN	NaN	NaN	NaN	NaN	NaN	NaN	NaN	NaN	NaN	NaN	NaN	NaN	NaN	NaN	NaN	NaN	NaN
Q06210	Glutamine--fructose-6-phosphate aminotransferase [isomerizing] 1	GFPT1	NaN	24.1856	24.8849	NaN	NaN	NaN	NaN	NaN	NaN	NaN	NaN	25.3123	25.0368	25.4791	25.4142	25.5824	NaN	25.0717	NaN	NaN	24.1428	25.5496	23.6406	24.9347	25.3243	24.2085	NaN	NaN	NaN	NaN	NaN	NaN	NaN	25.6314	24.9434	NaN	25.8309	25.2201	NaN	NaN	NaN	NaN	NaN	NaN	24.9032	NaN	24.688
O94808	Glutamine--fructose-6-phosphate aminotransferase [isomerizing] 2	GFPT2	NaN	NaN	NaN	NaN	NaN	NaN	NaN	NaN	NaN	NaN	NaN	NaN	NaN	NaN	NaN	NaN	NaN	NaN	NaN	NaN	NaN	NaN	NaN	NaN	NaN	NaN	NaN	NaN	NaN	NaN	24.0141	NaN	NaN	NaN	NaN	NaN	NaN	NaN	NaN	NaN	NaN	NaN	NaN	NaN	NaN	NaN	NaN
P56159	GDNF family receptor alpha-1	GFRA1	NaN	NaN	NaN	NaN	NaN	NaN	NaN	NaN	NaN	NaN	NaN	NaN	NaN	NaN	NaN	NaN	NaN	NaN	NaN	NaN	NaN	NaN	NaN	NaN	NaN	NaN	NaN	NaN	NaN	NaN	NaN	NaN	NaN	NaN	NaN	NaN	22.7519	NaN	NaN	NaN	NaN	NaN	NaN	NaN	NaN	NaN	NaN
O75223	Gamma-glutamylcyclotransferase	GGCT	NaN	NaN	NaN	25.5714	NaN	NaN	NaN	NaN	NaN	NaN	NaN	NaN	NaN	NaN	NaN	NaN	NaN	NaN	NaN	NaN	NaN	NaN	NaN	NaN	NaN	NaN	NaN	NaN	NaN	NaN	NaN	NaN	NaN	NaN	NaN	NaN	NaN	NaN	NaN	NaN	NaN	NaN	NaN	NaN	NaN	NaN	NaN
Q92820	Gamma-glutamyl hydrolase	GGH	27.5995	27.9604	NaN	27.6579	29.0722	28.3006	28.649	28.9572	28.4852	NaN	28.6904	28.8914	27.5535	27.8081	27.766	NaN	NaN	NaN	29.9154	NaN	NaN	28.6784	28.2682	27.553	NaN	NaN	27.9609	NaN	28.6874	NaN	NaN	28.6761	29.4464	NaN	NaN	NaN	28.9151	NaN	NaN	NaN	NaN	29.3501	NaN	NaN	NaN	NaN	NaN
P36268;P19440;A6NGU5	Inactive gamma-glutamyltranspeptidase 2;Gamma-glutamyltranspeptidase 1;Gamma-glutamyltranspeptidase 1 heavy chain;Gamma-glutamyltranspeptidase 1 light chain;Putative gamma-glutamyltranspeptidase 3;Putative gamma-glutamyltranspeptidase 3 heavy chain;Putative gamma-glutamyltranspeptidase 3 light chain	GGT2;GGT1;GGT3P	NaN	NaN	NaN	NaN	NaN	NaN	NaN	NaN	NaN	NaN	NaN	NaN	NaN	NaN	24.3603	NaN	NaN	NaN	NaN	NaN	NaN	NaN	NaN	NaN	NaN	NaN	NaN	NaN	NaN	NaN	NaN	NaN	NaN	NaN	27.0474	NaN	NaN	28.3327	NaN	NaN	NaN	28.9014	NaN	NaN	NaN	NaN	NaN
P36269	Gamma-glutamyltransferase 5;Gamma-glutamyltransferase 5 heavy chain;Gamma-glutamyltransferase 5 light chain	GGT5	26.2786	25.5774	NaN	25.914	NaN	NaN	NaN	NaN	NaN	NaN	NaN	NaN	NaN	NaN	NaN	NaN	NaN	NaN	NaN	NaN	NaN	NaN	24.9217	NaN	NaN	NaN	NaN	NaN	NaN	NaN	NaN	NaN	NaN	NaN	NaN	NaN	NaN	NaN	NaN	NaN	NaN	NaN	NaN	NaN	NaN	25.1132	NaN
Q9NWU2	Glucose-induced degradation protein 8 homolog	GID8	NaN	NaN	NaN	NaN	NaN	NaN	NaN	NaN	NaN	NaN	NaN	NaN	NaN	NaN	NaN	NaN	NaN	NaN	NaN	NaN	NaN	NaN	21.7763	NaN	NaN	NaN	NaN	NaN	NaN	NaN	NaN	NaN	NaN	NaN	NaN	NaN	NaN	NaN	NaN	NaN	NaN	NaN	NaN	NaN	NaN	NaN	NaN
Q9NUV9	GTPase IMAP family member 4	GIMAP4	NaN	NaN	NaN	NaN	NaN	NaN	NaN	NaN	NaN	NaN	NaN	NaN	NaN	NaN	NaN	NaN	NaN	NaN	NaN	NaN	NaN	NaN	NaN	NaN	NaN	NaN	NaN	NaN	NaN	NaN	NaN	NaN	NaN	NaN	NaN	NaN	NaN	NaN	NaN	NaN	NaN	NaN	NaN	NaN	NaN	NaN	21.3768
Q9Y2X7	ARF GTPase-activating protein GIT1	GIT1	NaN	NaN	NaN	NaN	NaN	NaN	NaN	NaN	NaN	NaN	NaN	NaN	NaN	NaN	NaN	NaN	NaN	NaN	NaN	NaN	NaN	NaN	NaN	NaN	NaN	NaN	NaN	NaN	NaN	NaN	NaN	NaN	NaN	NaN	NaN	NaN	NaN	NaN	NaN	NaN	NaN	NaN	NaN	NaN	NaN	NaN	NaN
P17302	Gap junction alpha-1 protein	GJA1	NaN	NaN	NaN	NaN	NaN	NaN	NaN	NaN	NaN	NaN	NaN	NaN	NaN	NaN	NaN	NaN	NaN	NaN	NaN	NaN	NaN	23.1428	NaN	NaN	NaN	NaN	NaN	NaN	NaN	NaN	NaN	NaN	NaN	NaN	NaN	NaN	NaN	NaN	NaN	NaN	NaN	NaN	NaN	NaN	NaN	NaN	NaN
P06280	Alpha-galactosidase A	GLA	22.6355	23.7732	NaN	NaN	NaN	23.6001	NaN	NaN	NaN	24.0413	NaN	NaN	NaN	NaN	NaN	NaN	NaN	NaN	NaN	NaN	NaN	NaN	NaN	NaN	NaN	NaN	NaN	NaN	NaN	NaN	NaN	NaN	NaN	NaN	NaN	NaN	NaN	NaN	NaN	NaN	NaN	NaN	NaN	NaN	NaN	NaN	NaN
P16278	Beta-galactosidase	GLB1	NaN	24.3149	NaN	NaN	NaN	NaN	NaN	NaN	NaN	NaN	NaN	NaN	NaN	NaN	NaN	NaN	NaN	NaN	NaN	NaN	NaN	NaN	NaN	NaN	NaN	NaN	NaN	NaN	NaN	NaN	NaN	NaN	NaN	NaN	NaN	NaN	NaN	NaN	NaN	NaN	NaN	NaN	NaN	NaN	NaN	NaN	NaN
Q6ZMI3	Gliomedin	GLDN	NaN	NaN	NaN	NaN	NaN	NaN	NaN	NaN	NaN	NaN	NaN	NaN	NaN	NaN	NaN	NaN	NaN	NaN	NaN	NaN	NaN	NaN	NaN	NaN	NaN	NaN	NaN	NaN	NaN	NaN	NaN	NaN	NaN	NaN	NaN	NaN	NaN	NaN	NaN	NaN	NaN	NaN	NaN	27.2395	NaN	NaN	NaN
Q92896	Golgi apparatus protein 1	GLG1	24.4573	25.2036	NaN	NaN	NaN	NaN	NaN	NaN	NaN	NaN	NaN	24.358	NaN	NaN	NaN	NaN	NaN	NaN	24.9245	NaN	25.588	25.368	NaN	23.9019	NaN	NaN	NaN	NaN	NaN	NaN	NaN	NaN	NaN	NaN	25.6616	NaN	24.9614	NaN	NaN	NaN	NaN	NaN	NaN	NaN	24.5806	24.1547	NaN
Q9H4G4	Golgi-associated plant pathogenesis-related protein 1	GLIPR2	24.5867	25.3178	NaN	25.5958	NaN	NaN	NaN	NaN	NaN	NaN	NaN	NaN	NaN	NaN	NaN	NaN	NaN	NaN	NaN	NaN	NaN	NaN	NaN	NaN	NaN	NaN	NaN	NaN	NaN	NaN	NaN	NaN	24.6661	NaN	NaN	NaN	NaN	NaN	NaN	NaN	NaN	NaN	NaN	NaN	NaN	23.7255	NaN
Q04760	Lactoylglutathione lyase	GLO1	27.1373	26.6002	NaN	28.3395	24.2588	25.1439	NaN	23.4382	NaN	NaN	NaN	NaN	NaN	NaN	NaN	26.1264	24.9246	24.9434	24.9277	NaN	NaN	NaN	24.9225	24.8609	NaN	NaN	NaN	NaN	23.7341	NaN	NaN	NaN	NaN	25.4139	25.1653	NaN	NaN	25.5495	NaN	24.1837	NaN	NaN	NaN	26.8259	25.4454	24.8012	23.417
Q9HC38	Glyoxalase domain-containing protein 4	GLOD4	26.5681	25.4112	NaN	25.7234	24.7003	NaN	24.9506	NaN	NaN	NaN	NaN	24.9091	24.4422	24.3829	NaN	NaN	NaN	NaN	NaN	NaN	NaN	NaN	24.3293	NaN	NaN	NaN	24.7999	NaN	NaN	NaN	NaN	NaN	NaN	24.4817	NaN	NaN	NaN	NaN	NaN	NaN	NaN	NaN	NaN	NaN	NaN	25.1232	NaN
P35754	Glutaredoxin-1	GLRX	27.2202	26.0714	25.1911	27.2962	NaN	NaN	NaN	NaN	NaN	NaN	NaN	NaN	NaN	24.6746	24.9397	NaN	NaN	NaN	NaN	NaN	NaN	NaN	26.0168	24.6523	25.8714	NaN	NaN	NaN	NaN	NaN	NaN	NaN	NaN	26.633	NaN	NaN	NaN	NaN	NaN	NaN	NaN	NaN	NaN	NaN	NaN	NaN	NaN
O76003	Glutaredoxin-3	GLRX3	24.1785	24.1815	NaN	23.763	NaN	NaN	NaN	NaN	NaN	NaN	NaN	NaN	NaN	NaN	NaN	NaN	NaN	NaN	NaN	NaN	NaN	NaN	24.3933	NaN	NaN	NaN	NaN	NaN	NaN	NaN	NaN	NaN	NaN	NaN	NaN	NaN	NaN	NaN	NaN	NaN	NaN	NaN	NaN	NaN	NaN	NaN	NaN
Q86SX6	Glutaredoxin-related protein 5, mitochondrial	GLRX5	NaN	NaN	NaN	NaN	NaN	NaN	NaN	NaN	NaN	NaN	NaN	NaN	NaN	NaN	NaN	NaN	NaN	NaN	NaN	NaN	NaN	NaN	NaN	NaN	NaN	NaN	NaN	NaN	NaN	NaN	NaN	NaN	NaN	NaN	NaN	NaN	NaN	NaN	NaN	NaN	NaN	NaN	NaN	NaN	NaN	NaN	NaN
O94925	Glutaminase kidney isoform, mitochondrial	GLS	NaN	NaN	NaN	NaN	NaN	NaN	NaN	NaN	NaN	NaN	NaN	NaN	NaN	NaN	NaN	NaN	NaN	NaN	NaN	NaN	NaN	NaN	NaN	NaN	NaN	NaN	NaN	NaN	NaN	NaN	NaN	NaN	NaN	NaN	NaN	NaN	NaN	NaN	NaN	NaN	NaN	NaN	NaN	NaN	NaN	NaN	NaN
P00367;P49448	Glutamate dehydrogenase 1, mitochondrial;Glutamate dehydrogenase 2, mitochondrial	GLUD1;GLUD2	29.7388	29.3283	NaN	29.3876	22.5385	23.4653	NaN	NaN	NaN	22.8694	NaN	22.8208	25.3165	NaN	26.0094	25.2928	NaN	24.2738	NaN	NaN	26.5914	23.6693	27.294	NaN	26.1512	NaN	25.104	NaN	22.5245	NaN	NaN	NaN	NaN	25.9892	25.4726	NaN	26.9954	NaN	NaN	NaN	NaN	NaN	NaN	23.4791	23.9966	27.1175	26.048
P15104	Glutamine synthetase	GLUL	23.8735	23.8961	NaN	24.0072	NaN	NaN	NaN	NaN	NaN	NaN	NaN	NaN	NaN	NaN	NaN	NaN	NaN	NaN	NaN	NaN	NaN	NaN	NaN	NaN	NaN	NaN	NaN	NaN	NaN	NaN	NaN	NaN	NaN	NaN	NaN	NaN	NaN	NaN	NaN	NaN	NaN	NaN	NaN	NaN	NaN	NaN	NaN
O60547	GDP-mannose 4,6 dehydratase	GMDS	22.4036	NaN	NaN	NaN	NaN	NaN	NaN	NaN	NaN	NaN	NaN	NaN	NaN	NaN	NaN	NaN	NaN	NaN	NaN	NaN	NaN	NaN	NaN	NaN	NaN	NaN	NaN	NaN	NaN	NaN	NaN	NaN	NaN	NaN	NaN	NaN	NaN	NaN	NaN	NaN	NaN	NaN	NaN	NaN	NaN	NaN	NaN
P60983	Glia maturation factor beta	GMFB	26.0243	26.1518	NaN	26.271	NaN	NaN	NaN	NaN	NaN	NaN	NaN	NaN	24.7561	NaN	NaN	NaN	NaN	27.2927	NaN	NaN	NaN	25.0639	24.8073	24.9051	NaN	NaN	NaN	NaN	24.7816	NaN	NaN	NaN	NaN	25.7099	25.0109	NaN	NaN	NaN	NaN	NaN	NaN	NaN	NaN	27.0744	NaN	25.7682	NaN
O60234	Glia maturation factor gamma	GMFG	24.8245	24.6795	NaN	25.4162	NaN	NaN	NaN	NaN	NaN	NaN	NaN	NaN	NaN	NaN	NaN	NaN	NaN	NaN	NaN	NaN	NaN	NaN	23.2366	NaN	NaN	NaN	NaN	NaN	NaN	NaN	NaN	NaN	NaN	NaN	NaN	NaN	NaN	NaN	NaN	NaN	NaN	NaN	NaN	NaN	NaN	NaN	NaN
Q96IJ6	Mannose-1-phosphate guanyltransferase alpha	GMPPA	NaN	24.3867	NaN	23.4015	NaN	NaN	NaN	NaN	NaN	NaN	NaN	NaN	NaN	NaN	NaN	NaN	NaN	NaN	NaN	NaN	NaN	NaN	NaN	NaN	23.823	NaN	NaN	NaN	NaN	NaN	24.9139	NaN	NaN	NaN	NaN	NaN	NaN	NaN	NaN	NaN	NaN	NaN	NaN	NaN	23.8743	NaN	NaN
Q9Y5P6	Mannose-1-phosphate guanyltransferase beta	GMPPB	23.4007	24.4594	NaN	22.9789	NaN	NaN	NaN	NaN	NaN	NaN	NaN	NaN	NaN	NaN	NaN	NaN	NaN	NaN	NaN	NaN	NaN	24.3068	NaN	NaN	NaN	NaN	NaN	NaN	NaN	NaN	NaN	NaN	NaN	NaN	NaN	NaN	NaN	NaN	NaN	NaN	NaN	NaN	NaN	NaN	NaN	NaN	NaN
P36959	GMP reductase 1	GMPR	NaN	NaN	NaN	22.7036	NaN	NaN	NaN	NaN	NaN	NaN	NaN	NaN	NaN	NaN	NaN	NaN	NaN	NaN	NaN	NaN	NaN	NaN	NaN	NaN	NaN	NaN	NaN	NaN	NaN	NaN	NaN	NaN	NaN	NaN	NaN	NaN	NaN	NaN	NaN	NaN	NaN	NaN	NaN	NaN	NaN	NaN	NaN
Q9P2T1	GMP reductase 2	GMPR2	NaN	22.4543	NaN	NaN	NaN	NaN	NaN	NaN	NaN	NaN	NaN	NaN	NaN	NaN	NaN	NaN	NaN	NaN	NaN	NaN	NaN	NaN	NaN	NaN	NaN	NaN	NaN	NaN	NaN	NaN	NaN	NaN	NaN	NaN	NaN	NaN	NaN	NaN	NaN	NaN	NaN	NaN	NaN	NaN	NaN	NaN	NaN
P29992	Guanine nucleotide-binding protein subunit alpha-11	GNA11	24.1044	NaN	NaN	NaN	NaN	NaN	NaN	NaN	NaN	NaN	NaN	NaN	NaN	NaN	26.0914	NaN	NaN	NaN	NaN	NaN	NaN	NaN	24.7425	24.6976	NaN	NaN	NaN	NaN	NaN	NaN	NaN	NaN	NaN	NaN	23.9511	NaN	NaN	NaN	NaN	NaN	NaN	NaN	NaN	NaN	NaN	NaN	NaN
Q14344	Guanine nucleotide-binding protein subunit alpha-13	GNA13	NaN	23.1623	NaN	NaN	NaN	NaN	NaN	NaN	NaN	NaN	NaN	NaN	NaN	NaN	NaN	NaN	NaN	NaN	NaN	NaN	NaN	NaN	NaN	NaN	NaN	NaN	NaN	NaN	NaN	NaN	NaN	NaN	NaN	NaN	NaN	NaN	NaN	NaN	NaN	NaN	NaN	NaN	NaN	NaN	NaN	NaN	NaN
P04899	Guanine nucleotide-binding protein G(i) subunit alpha-2	GNAI2	28.4377	28.3454	25.1851	27.4792	24.9718	26.1218	24.8614	NaN	NaN	25.466	25.0496	28.3735	28.1362	29.3101	28.1746	27.9964	27.724	26.8559	25.6936	25.1579	NaN	26.3868	28.5645	28.0731	29.0272	27.8533	27.7022	NaN	26.1383	27.2747	26.4209	NaN	26.8801	28.981	28.9306	27.9902	28.1994	27.7884	27.3124	25.7809	26.28	26.5428	26.9117	26.1815	27.4844	26.9061	27.6243
P08754	Guanine nucleotide-binding protein G(k) subunit alpha	GNAI3	NaN	24.4753	NaN	NaN	NaN	NaN	NaN	NaN	NaN	NaN	NaN	NaN	NaN	NaN	NaN	NaN	NaN	NaN	NaN	NaN	NaN	NaN	NaN	NaN	NaN	NaN	NaN	NaN	NaN	NaN	NaN	NaN	NaN	NaN	NaN	NaN	NaN	NaN	NaN	NaN	NaN	NaN	NaN	NaN	NaN	NaN	NaN
P09471	Guanine nucleotide-binding protein G(o) subunit alpha	GNAO1	NaN	NaN	NaN	NaN	NaN	NaN	NaN	NaN	NaN	NaN	NaN	NaN	NaN	NaN	NaN	NaN	NaN	NaN	NaN	NaN	NaN	NaN	NaN	NaN	NaN	NaN	NaN	NaN	NaN	NaN	NaN	NaN	NaN	NaN	NaN	NaN	NaN	NaN	NaN	NaN	NaN	NaN	NaN	NaN	NaN	NaN	NaN
P50148	Guanine nucleotide-binding protein G(q) subunit alpha	GNAQ	NaN	23.8224	NaN	NaN	NaN	NaN	NaN	NaN	NaN	NaN	NaN	NaN	NaN	NaN	NaN	NaN	NaN	NaN	NaN	NaN	NaN	NaN	NaN	NaN	NaN	NaN	NaN	NaN	NaN	NaN	NaN	NaN	NaN	NaN	NaN	NaN	NaN	NaN	NaN	NaN	NaN	NaN	NaN	NaN	NaN	NaN	NaN
P63092;Q5JWF2	Guanine nucleotide-binding protein G(s) subunit alpha isoforms short;Guanine nucleotide-binding protein G(s) subunit alpha isoforms XLas	GNAS	26.0314	25.8721	25.4923	25.2919	24.474	24.1672	NaN	NaN	NaN	NaN	22.8657	26.8014	26.8301	27.49	27.1325	27.6176	25.6527	26.2345	26.6587	25.6158	27.0752	26.2717	25.9172	26.1736	26.7647	26.7981	24.7967	NaN	25.4728	NaN	24.3324	NaN	NaN	26.5754	26.6925	28.2226	27.7999	27.2606	27.8195	25.912	25.4524	26.8715	26.3288	26.0064	26.6182	25.9321	25.6846
P62873	Guanine nucleotide-binding protein G(I)/G(S)/G(T) subunit beta-1	GNB1	28.114	27.4784	24.4492	28.4641	24.9856	24.9943	26.4238	NaN	NaN	NaN	NaN	26.933	27.4956	26.9032	26.556	27.8428	26.7728	27.2501	26.9467	26.4428	27.9318	26.9425	27.2602	25.6345	26.2359	26.3675	25.7338	25.6242	24.1029	NaN	24.1192	24.4109	NaN	26.7823	26.9518	28.1343	29.4327	26.7307	NaN	25.4901	26.346	28.5836	27.3669	NaN	26.0003	27.3018	25.9098
P62879	Guanine nucleotide-binding protein G(I)/G(S)/G(T) subunit beta-2	GNB2	27.5937	27.3632	25.6644	27.2832	NaN	24.5572	NaN	NaN	NaN	NaN	NaN	27.1638	27.6593	27.9795	27.804	27.1134	27.2584	27.5101	26.7633	27.4197	27.1001	27.2538	27.0166	26.4353	28.8352	NaN	NaN	NaN	27.0685	NaN	NaN	NaN	NaN	27.8742	27.5339	29.9035	30.7213	26.4713	28.3212	NaN	NaN	28.7949	NaN	26.9987	26.7715	25.8741	27.4419
P63244	Guanine nucleotide-binding protein subunit beta-2-like 1;Guanine nucleotide-binding protein subunit beta-2-like 1, N-terminally processed	GNB2L1	28.1498	28.4755	26.1117	28.1124	24.8967	26.0046	24.0761	26.7231	25.6591	26.7035	24.4135	26.3005	26.9068	26.9131	26.5513	26.0052	25.8677	26.7091	NaN	25.1019	NaN	26.8847	27.8463	23.4951	26.3312	26.5803	NaN	NaN	24.8823	24.7741	NaN	NaN	NaN	27.531	24.947	26.4408	27.4713	NaN	NaN	NaN	NaN	NaN	NaN	NaN	26.2291	26.2067	25.851
Q9HAV0	Guanine nucleotide-binding protein subunit beta-4	GNB4	23.4242	NaN	NaN	NaN	NaN	NaN	NaN	NaN	NaN	NaN	NaN	NaN	NaN	NaN	NaN	NaN	NaN	NaN	NaN	NaN	NaN	NaN	NaN	NaN	NaN	NaN	NaN	NaN	NaN	NaN	NaN	NaN	NaN	NaN	NaN	NaN	NaN	NaN	NaN	NaN	NaN	NaN	NaN	NaN	NaN	NaN	NaN
Q9UBI6	Guanine nucleotide-binding protein G(I)/G(S)/G(O) subunit gamma-12	GNG12	26.0788	26.9461	NaN	26.9078	NaN	NaN	NaN	NaN	NaN	NaN	NaN	26.9275	26.9654	NaN	26.702	NaN	NaN	NaN	NaN	NaN	NaN	NaN	NaN	NaN	NaN	NaN	NaN	NaN	NaN	NaN	NaN	NaN	NaN	NaN	25.2537	NaN	26.0676	NaN	NaN	NaN	NaN	NaN	NaN	NaN	NaN	NaN	NaN
P59768	Guanine nucleotide-binding protein G(I)/G(S)/G(O) subunit gamma-2	GNG2	NaN	NaN	NaN	NaN	24.4017	NaN	NaN	NaN	NaN	NaN	NaN	NaN	NaN	NaN	NaN	NaN	NaN	NaN	NaN	NaN	NaN	NaN	NaN	NaN	NaN	NaN	NaN	NaN	NaN	NaN	NaN	NaN	NaN	NaN	NaN	NaN	NaN	NaN	NaN	NaN	NaN	NaN	NaN	NaN	NaN	NaN	NaN
P22749	Granulysin	GNLY	NaN	NaN	NaN	NaN	NaN	NaN	NaN	NaN	NaN	NaN	NaN	NaN	NaN	NaN	23.76	25.7922	25.1151	24.7344	25.3508	25.6826	26.0873	NaN	NaN	25.9102	24.5051	NaN	NaN	NaN	NaN	NaN	NaN	NaN	NaN	NaN	NaN	NaN	NaN	NaN	NaN	NaN	24.7795	NaN	NaN	NaN	NaN	NaN	NaN
P46926	Glucosamine-6-phosphate isomerase 1	GNPDA1	25.1475	25.1128	NaN	24.0592	NaN	NaN	NaN	NaN	NaN	NaN	NaN	NaN	NaN	NaN	NaN	NaN	NaN	NaN	NaN	NaN	NaN	NaN	NaN	NaN	NaN	NaN	NaN	NaN	24.9357	25.4263	25.504	NaN	NaN	NaN	NaN	NaN	NaN	NaN	NaN	NaN	NaN	NaN	NaN	NaN	NaN	NaN	NaN
Q96EK6	Glucosamine 6-phosphate N-acetyltransferase	GNPNAT1	NaN	NaN	NaN	NaN	NaN	NaN	NaN	NaN	NaN	NaN	NaN	NaN	NaN	NaN	NaN	NaN	NaN	NaN	NaN	NaN	NaN	NaN	NaN	NaN	NaN	NaN	NaN	NaN	NaN	NaN	NaN	NaN	NaN	NaN	NaN	NaN	NaN	NaN	NaN	NaN	NaN	NaN	NaN	NaN	NaN	NaN	NaN
Q9UJJ9	N-acetylglucosamine-1-phosphotransferase subunit gamma	GNPTG	NaN	NaN	24.7797	23.7741	25.0681	NaN	NaN	NaN	NaN	24.5489	24.6757	NaN	NaN	NaN	NaN	NaN	NaN	NaN	NaN	NaN	NaN	NaN	NaN	NaN	NaN	NaN	25.3382	NaN	25.3746	25.5695	25.8378	NaN	25.0945	NaN	NaN	NaN	NaN	NaN	NaN	25.089	NaN	NaN	NaN	NaN	NaN	25.2419	NaN
P15586	N-acetylglucosamine-6-sulfatase	GNS	24.8925	25.001	NaN	25.4174	NaN	NaN	NaN	25.6885	NaN	NaN	NaN	NaN	24.0416	NaN	NaN	24.2549	NaN	24.7149	NaN	NaN	NaN	24.6736	NaN	NaN	NaN	NaN	NaN	NaN	NaN	NaN	NaN	NaN	NaN	NaN	24.3064	NaN	NaN	NaN	NaN	NaN	NaN	NaN	NaN	NaN	NaN	NaN	NaN
Q08378	Golgin subfamily A member 3	GOLGA3	26.0821	24.7455	NaN	24.5109	NaN	NaN	NaN	NaN	NaN	NaN	NaN	NaN	NaN	NaN	NaN	25.6835	NaN	26.8614	NaN	NaN	NaN	NaN	NaN	NaN	NaN	NaN	NaN	NaN	NaN	NaN	NaN	NaN	NaN	NaN	NaN	NaN	NaN	26.6269	26.1435	NaN	NaN	NaN	NaN	27.4267	NaN	NaN	NaN
Q14789	Golgin subfamily B member 1	GOLGB1	NaN	22.0956	NaN	NaN	NaN	NaN	NaN	NaN	NaN	NaN	NaN	NaN	NaN	NaN	NaN	NaN	NaN	NaN	NaN	NaN	NaN	NaN	NaN	NaN	NaN	NaN	NaN	NaN	NaN	NaN	NaN	NaN	NaN	NaN	NaN	NaN	NaN	NaN	NaN	NaN	NaN	NaN	NaN	NaN	NaN	NaN	NaN
O00461	Golgi integral membrane protein 4	GOLIM4	NaN	25.1106	NaN	NaN	27.0012	NaN	NaN	NaN	NaN	NaN	NaN	NaN	NaN	NaN	NaN	NaN	NaN	NaN	NaN	NaN	NaN	NaN	NaN	NaN	NaN	NaN	NaN	NaN	26.5345	NaN	NaN	NaN	NaN	NaN	NaN	NaN	NaN	NaN	NaN	26.7987	NaN	NaN	NaN	26.9874	NaN	NaN	NaN
Q8NBJ4	Golgi membrane protein 1	GOLM1	22.4262	22.7235	NaN	22.3521	NaN	NaN	NaN	NaN	NaN	NaN	NaN	NaN	NaN	NaN	NaN	NaN	NaN	NaN	NaN	NaN	NaN	NaN	NaN	NaN	NaN	NaN	NaN	NaN	NaN	NaN	NaN	NaN	NaN	NaN	NaN	NaN	NaN	NaN	NaN	NaN	NaN	NaN	NaN	NaN	NaN	NaN	NaN
Q9H8Y8	Golgi reassembly-stacking protein 2	GORASP2	NaN	23.8796	NaN	NaN	NaN	NaN	NaN	NaN	NaN	NaN	NaN	NaN	23.3336	NaN	NaN	NaN	NaN	NaN	NaN	NaN	NaN	NaN	NaN	NaN	NaN	NaN	NaN	NaN	NaN	NaN	NaN	NaN	NaN	NaN	NaN	NaN	NaN	NaN	NaN	NaN	NaN	NaN	NaN	NaN	NaN	NaN	NaN
P17174	Aspartate aminotransferase, cytoplasmic	GOT1	30.1341	26.8062	NaN	30.4024	NaN	NaN	25.648	26.2559	25.0734	NaN	23.9758	27.0316	27.7255	25.8814	28.6274	24.6461	24.5781	25.6402	NaN	NaN	25.192	25.9195	24.8943	25.1462	23.9064	18.8755	NaN	NaN	NaN	NaN	24.0775	NaN	23.4911	27.2423	24.1954	NaN	27.2008	26.3915	23.9134	25.369	26.5001	24.6145	25.7287	NaN	NaN	NaN	23.8605
P00505	Aspartate aminotransferase, mitochondrial	GOT2	28.3715	27.885	NaN	29.0369	NaN	25.5953	NaN	NaN	NaN	NaN	NaN	25.3592	26.9649	NaN	28.0473	NaN	NaN	27.4191	26.5043	NaN	25.9768	27.6625	25.4429	NaN	NaN	NaN	NaN	NaN	NaN	NaN	NaN	NaN	NaN	27.1281	24.9342	NaN	27.3741	25.199	NaN	NaN	NaN	NaN	NaN	NaN	27.2581	NaN	NaN
P35052	Glypican-1;Secreted glypican-1	GPC1	24.6012	NaN	24.54	26.5092	24.5948	24.3251	25.4457	NaN	NaN	25.04	25.5722	NaN	25.5409	NaN	NaN	27.3977	27.7125	28.5426	27.8389	27.2062	28.2273	28.0458	26.4753	26.8715	NaN	NaN	26.9017	28.26	25.2089	26.6422	NaN	24.094	26.3783	NaN	27.4985	NaN	NaN	25.6862	28.0156	28.0685	28.9567	27.9944	26.9196	28.3574	25.761	24.1271	25.7965
Q9Y625	Glypican-6;Secreted glypican-6	GPC6	NaN	NaN	NaN	NaN	NaN	NaN	NaN	NaN	NaN	NaN	NaN	NaN	NaN	NaN	NaN	NaN	NaN	NaN	NaN	NaN	NaN	NaN	NaN	NaN	NaN	NaN	NaN	NaN	NaN	NaN	NaN	NaN	NaN	NaN	NaN	NaN	NaN	NaN	NaN	NaN	NaN	NaN	NaN	NaN	NaN	NaN	NaN
P21695	Glycerol-3-phosphate dehydrogenase [NAD(+)], cytoplasmic	GPD1	29.1666	27.1401	NaN	28.7472	23.177	NaN	NaN	NaN	24.1107	24.5049	24.1996	NaN	NaN	25.0966	25.4376	NaN	NaN	NaN	NaN	NaN	NaN	24.351	NaN	NaN	NaN	NaN	NaN	NaN	NaN	NaN	NaN	24.5473	NaN	24.949	NaN	NaN	NaN	NaN	NaN	NaN	NaN	NaN	NaN	NaN	25.502	NaN	NaN
Q8N335	Glycerol-3-phosphate dehydrogenase 1-like protein	GPD1L	NaN	NaN	NaN	24.6204	NaN	NaN	NaN	NaN	NaN	NaN	NaN	NaN	NaN	NaN	NaN	NaN	NaN	NaN	NaN	NaN	NaN	NaN	NaN	NaN	NaN	NaN	NaN	NaN	NaN	NaN	NaN	NaN	NaN	NaN	NaN	NaN	NaN	NaN	NaN	NaN	NaN	NaN	NaN	NaN	NaN	NaN	NaN
P43304	Glycerol-3-phosphate dehydrogenase, mitochondrial	GPD2	23.5874	NaN	NaN	NaN	NaN	NaN	NaN	NaN	NaN	NaN	NaN	NaN	NaN	NaN	NaN	NaN	NaN	NaN	NaN	NaN	NaN	NaN	NaN	NaN	NaN	NaN	NaN	NaN	NaN	NaN	NaN	NaN	NaN	NaN	NaN	NaN	NaN	NaN	NaN	NaN	NaN	NaN	NaN	NaN	NaN	NaN	NaN
P06744	Glucose-6-phosphate isomerase	GPI	29.4527	29.11	26.9912	29.3051	26.1452	26.4876	25.4317	NaN	25.4519	25.6682	26.4395	27.4464	27.538	28.0047	28.8259	27.3797	NaN	27.4946	25.8845	26.7412	26.1614	27.7523	27.9461	27.1564	27.7294	25.2358	26.7881	NaN	24.921	25.4094	25.7456	25.3693	25.8116	27.9943	27.1568	NaN	27.5811	28.0474	26.5819	NaN	NaN	NaN	23.7267	NaN	28.3232	27.6802	27.6661
P80108	Phosphatidylinositol-glycan-specific phospholipase D	GPLD1	25.3566	25.2627	27.126	NaN	27.0108	27.4998	27.2322	26.5815	29.1296	26.901	28.6008	25.7063	NaN	NaN	NaN	NaN	NaN	NaN	NaN	NaN	NaN	NaN	25.0536	26.0322	NaN	NaN	26.3371	27.4017	28.4421	27.5265	28.7704	27.77	29.2718	NaN	NaN	NaN	NaN	24.9223	NaN	NaN	22.9091	NaN	NaN	NaN	NaN	26.6464	25.462
Q14956	Transmembrane glycoprotein NMB	GPNMB	24.203	26.3739	NaN	24.8341	NaN	NaN	NaN	NaN	NaN	NaN	NaN	NaN	NaN	NaN	NaN	NaN	NaN	NaN	NaN	NaN	NaN	NaN	24.5772	NaN	24.9928	NaN	NaN	NaN	NaN	NaN	NaN	NaN	NaN	NaN	NaN	NaN	NaN	NaN	NaN	NaN	NaN	NaN	NaN	NaN	NaN	NaN	NaN
P24298	Alanine aminotransferase 1	GPT	23.2336	NaN	NaN	22.7638	NaN	NaN	NaN	NaN	NaN	NaN	NaN	NaN	NaN	NaN	NaN	NaN	NaN	NaN	NaN	NaN	NaN	NaN	NaN	NaN	NaN	NaN	NaN	NaN	NaN	NaN	NaN	NaN	NaN	NaN	NaN	NaN	NaN	NaN	NaN	NaN	NaN	NaN	NaN	NaN	NaN	NaN	NaN
P07203	Glutathione peroxidase 1	GPX1	27.7596	27.4588	NaN	28.6542	NaN	NaN	NaN	NaN	NaN	NaN	NaN	NaN	23.8743	NaN	25.3189	NaN	NaN	NaN	NaN	NaN	NaN	NaN	25.7121	25.0744	25.9824	25.1971	NaN	NaN	NaN	NaN	NaN	NaN	NaN	24.9186	24.5083	NaN	NaN	NaN	NaN	NaN	NaN	NaN	NaN	NaN	NaN	24.1718	NaN
P22352	Glutathione peroxidase 3	GPX3	28.8469	29.2272	28.6732	29.5818	28.7664	28.459	28.9926	28.7395	29.2405	27.8893	28.8734	28.334	28.7462	28.9649	27.8005	27.7702	27.4615	27.4301	28.2329	28.0622	27.6017	27.7452	28.8864	27.8945	26.6044	29.1061	28.4208	28.4618	28.4087	28.1936	28.278	28.2638	29.1514	28.4316	28.9737	29.1169	29.2982	28.5913	28.8641	28.2592	28.0472	28.6154	28.5314	26.2272	28.9597	29.2963	28.2477
P36969	Phospholipid hydroperoxide glutathione peroxidase, mitochondrial	GPX4	NaN	NaN	NaN	25.1002	NaN	NaN	NaN	NaN	NaN	NaN	NaN	NaN	NaN	NaN	NaN	NaN	NaN	NaN	NaN	NaN	NaN	NaN	NaN	NaN	NaN	NaN	NaN	NaN	NaN	NaN	NaN	NaN	NaN	NaN	NaN	NaN	NaN	NaN	NaN	NaN	NaN	NaN	NaN	NaN	NaN	NaN	NaN
Q96SL4	Glutathione peroxidase 7	GPX7	22.5815	23.1092	NaN	NaN	NaN	NaN	NaN	NaN	NaN	NaN	NaN	NaN	NaN	NaN	NaN	NaN	NaN	NaN	NaN	NaN	NaN	NaN	NaN	NaN	NaN	NaN	NaN	NaN	NaN	NaN	NaN	NaN	NaN	NaN	NaN	NaN	NaN	NaN	NaN	NaN	NaN	NaN	NaN	NaN	NaN	NaN	NaN
P62993	Growth factor receptor-bound protein 2	GRB2	26.6657	26.2061	NaN	26.8401	NaN	NaN	NaN	NaN	NaN	NaN	NaN	NaN	NaN	NaN	NaN	NaN	NaN	NaN	NaN	NaN	NaN	NaN	NaN	NaN	NaN	NaN	NaN	NaN	NaN	NaN	NaN	NaN	NaN	NaN	NaN	NaN	NaN	NaN	NaN	NaN	NaN	NaN	NaN	NaN	NaN	NaN	NaN
O60565	Gremlin-1	GREM1	NaN	NaN	NaN	NaN	NaN	NaN	NaN	NaN	NaN	NaN	NaN	NaN	NaN	NaN	NaN	NaN	NaN	NaN	NaN	NaN	NaN	NaN	NaN	NaN	NaN	NaN	NaN	NaN	NaN	NaN	NaN	NaN	NaN	NaN	NaN	NaN	NaN	NaN	NaN	NaN	NaN	NaN	NaN	NaN	28.0636	NaN	NaN
Q9UBQ7	Glyoxylate reductase/hydroxypyruvate reductase	GRHPR	26.7405	25.8809	NaN	27.5693	24.4536	NaN	24.0532	NaN	NaN	NaN	23.879	24.1433	NaN	NaN	24.7209	NaN	NaN	NaN	NaN	NaN	NaN	NaN	25.1865	NaN	NaN	NaN	NaN	NaN	NaN	NaN	NaN	NaN	NaN	25.726	NaN	NaN	NaN	24.3791	NaN	NaN	NaN	NaN	NaN	NaN	NaN	24.7603	23.9847
Q4V328	GRIP1-associated protein 1	GRIPAP1	NaN	NaN	NaN	NaN	NaN	NaN	NaN	NaN	NaN	NaN	NaN	NaN	NaN	NaN	NaN	NaN	NaN	NaN	NaN	NaN	NaN	NaN	NaN	NaN	NaN	NaN	NaN	NaN	NaN	NaN	NaN	NaN	NaN	NaN	NaN	NaN	NaN	NaN	NaN	NaN	NaN	NaN	NaN	NaN	NaN	NaN	NaN
P28799	Granulins;Acrogranin;Paragranulin;Granulin-1;Granulin-2;Granulin-3;Granulin-4;Granulin-5;Granulin-6;Granulin-7	GRN	25.0722	24.8611	NaN	NaN	NaN	NaN	24.9183	24.6276	NaN	24.3072	26.1191	NaN	NaN	NaN	NaN	24.5287	NaN	26.5605	26.1695	NaN	26.485	26.5535	NaN	NaN	NaN	NaN	NaN	NaN	NaN	NaN	24.4244	NaN	NaN	NaN	NaN	NaN	NaN	NaN	NaN	NaN	27.4978	NaN	26.9925	NaN	NaN	25.5005	NaN
Q9HAV7	GrpE protein homolog 1, mitochondrial	GRPEL1	NaN	NaN	NaN	22.9604	NaN	NaN	NaN	NaN	NaN	NaN	NaN	NaN	NaN	NaN	NaN	NaN	NaN	NaN	NaN	NaN	NaN	NaN	NaN	NaN	NaN	NaN	NaN	NaN	NaN	NaN	NaN	NaN	NaN	NaN	NaN	NaN	NaN	NaN	NaN	NaN	NaN	NaN	NaN	NaN	NaN	NaN	NaN
P57764	Gasdermin-D	GSDMD	NaN	NaN	NaN	NaN	NaN	NaN	NaN	NaN	NaN	NaN	NaN	NaN	NaN	NaN	NaN	NaN	NaN	NaN	NaN	NaN	NaN	NaN	NaN	NaN	NaN	NaN	NaN	NaN	NaN	NaN	NaN	NaN	NaN	NaN	NaN	NaN	NaN	NaN	NaN	NaN	NaN	NaN	NaN	NaN	NaN	NaN	NaN
P06396	Gelsolin	GSN	32.8027	32.9869	33.0882	32.8057	33.2405	33.4956	34.083	33.6519	33.3693	33.74	33.721	32.7693	32.8237	32.9285	32.9069	32.7484	33.0698	33.0114	32.8649	33.0656	32.8814	33.2906	33.2233	33.3546	32.3145	32.7995	34.0608	33.4299	33.771	33.0875	33.0413	33.3478	33.2768	32.9144	32.6275	32.0883	32.6422	32.5201	33.1046	32.7221	32.5703	32.7607	32.671	32.5593	32.7493	33.3416	32.8143
P15170;Q8IYD1	Eukaryotic peptide chain release factor GTP-binding subunit ERF3A;Eukaryotic peptide chain release factor GTP-binding subunit ERF3B	GSPT1;GSPT2	NaN	23.6278	NaN	NaN	NaN	NaN	NaN	NaN	NaN	NaN	NaN	NaN	NaN	NaN	NaN	NaN	NaN	NaN	NaN	NaN	NaN	NaN	NaN	NaN	NaN	NaN	NaN	NaN	NaN	NaN	NaN	NaN	NaN	NaN	NaN	NaN	NaN	NaN	NaN	NaN	NaN	NaN	NaN	NaN	NaN	NaN	NaN
P00390	Glutathione reductase, mitochondrial	GSR	25.8624	25.903	NaN	26.1624	NaN	NaN	NaN	NaN	NaN	NaN	NaN	24.7713	NaN	NaN	NaN	NaN	NaN	NaN	NaN	NaN	NaN	NaN	25.3953	NaN	NaN	NaN	NaN	NaN	NaN	NaN	NaN	NaN	NaN	NaN	NaN	NaN	NaN	NaN	NaN	NaN	NaN	NaN	NaN	NaN	NaN	NaN	NaN
P48637	Glutathione synthetase	GSS	25.1878	24.9984	NaN	25.6988	NaN	NaN	NaN	NaN	NaN	NaN	NaN	NaN	NaN	NaN	NaN	NaN	NaN	NaN	NaN	NaN	NaN	NaN	24.6942	NaN	NaN	NaN	NaN	NaN	NaN	NaN	NaN	NaN	NaN	NaN	NaN	NaN	NaN	NaN	NaN	NaN	NaN	NaN	NaN	NaN	NaN	NaN	NaN
Q9Y2Q3	Glutathione S-transferase kappa 1	GSTK1	24.8848	25.8341	NaN	24.8724	NaN	NaN	NaN	NaN	NaN	NaN	NaN	NaN	NaN	NaN	NaN	NaN	NaN	NaN	NaN	NaN	NaN	NaN	NaN	NaN	NaN	NaN	NaN	NaN	NaN	NaN	NaN	NaN	NaN	NaN	NaN	NaN	NaN	NaN	NaN	NaN	NaN	NaN	NaN	NaN	NaN	NaN	NaN
P28161	Glutathione S-transferase Mu 2	GSTM2	25.7173	23.9884	22.9584	25.8212	NaN	NaN	NaN	NaN	NaN	NaN	NaN	24.4689	24.3105	25.5828	24.6511	24.8515	NaN	25.7094	NaN	NaN	NaN	NaN	24.193	NaN	NaN	24.8265	NaN	NaN	NaN	NaN	NaN	NaN	NaN	24.9933	NaN	NaN	26.1252	NaN	NaN	NaN	NaN	NaN	NaN	NaN	26.2859	NaN	24.5109
P21266	Glutathione S-transferase Mu 3	GSTM3	23.7378	24.6769	24.0419	24.117	NaN	NaN	NaN	NaN	NaN	NaN	NaN	24.637	NaN	25.2419	24.9033	24.4534	NaN	26.298	NaN	25.0366	NaN	NaN	NaN	NaN	26.1913	NaN	NaN	NaN	NaN	NaN	NaN	NaN	NaN	25.3423	NaN	NaN	NaN	24.0858	NaN	NaN	NaN	NaN	NaN	NaN	24.7656	25.8893	24.9972
P78417	Glutathione S-transferase omega-1	GSTO1	26.8979	27.663	26.9413	26.8895	26.3269	26.756	NaN	26.969	25.702	NaN	25.5286	26.3291	26.6393	NaN	26.5258	26.7079	25.661	26.5881	NaN	25.2766	NaN	25.9602	26.6185	26.2929	27.5198	26.6341	25.4698	26.0985	25.2492	24.8409	26.7883	NaN	26.1936	27.2778	26.9174	27.3688	27.7204	NaN	26.8241	NaN	NaN	NaN	NaN	NaN	26.8889	26.302	26.465
P09211	Glutathione S-transferase P	GSTP1	30.0127	30.55	29.1525	30.475	27.5717	28.4452	26.7717	27.4441	26.7923	27.1144	26.9908	29.8326	30.3413	30.3944	29.6334	28.9398	28.6301	28.9837	27.7854	27.5273	27.7956	28.7019	29.2291	29.1366	29.731	29.0935	27.5756	28.1725	26.3569	26.8176	27.6269	27.4295	26.5077	30.2618	30.0898	30.0943	30.0304	29.2195	28.7392	27.582	28.6705	27.4179	27.3481	27.7392	29.8404	29.7908	28.7107
P30711	Glutathione S-transferase theta-1	GSTT1	NaN	NaN	NaN	NaN	NaN	NaN	NaN	NaN	NaN	NaN	NaN	NaN	24.2531	NaN	NaN	NaN	NaN	NaN	NaN	NaN	NaN	NaN	NaN	NaN	NaN	NaN	NaN	NaN	NaN	NaN	NaN	NaN	NaN	NaN	NaN	NaN	NaN	NaN	NaN	NaN	NaN	NaN	NaN	NaN	NaN	NaN	NaN
P0CG30;P0CG29	Glutathione S-transferase theta-2B;Glutathione S-transferase theta-2	GSTT2B;GSTT2	NaN	NaN	NaN	NaN	NaN	NaN	NaN	NaN	NaN	NaN	NaN	NaN	NaN	NaN	NaN	NaN	NaN	NaN	NaN	NaN	NaN	NaN	NaN	NaN	NaN	NaN	NaN	NaN	NaN	NaN	NaN	NaN	NaN	NaN	NaN	NaN	NaN	NaN	NaN	NaN	NaN	NaN	NaN	NaN	NaN	NaN	NaN
P35269	General transcription factor IIF subunit 1	GTF2F1	NaN	NaN	NaN	NaN	NaN	NaN	NaN	NaN	NaN	NaN	NaN	NaN	NaN	NaN	NaN	NaN	NaN	NaN	NaN	NaN	NaN	NaN	NaN	NaN	NaN	NaN	NaN	NaN	NaN	NaN	NaN	NaN	NaN	NaN	NaN	NaN	NaN	NaN	NaN	NaN	NaN	NaN	NaN	NaN	NaN	NaN	NaN
P78347	General transcription factor II-I	GTF2I	NaN	NaN	NaN	NaN	NaN	NaN	NaN	NaN	NaN	NaN	NaN	NaN	NaN	NaN	NaN	NaN	NaN	NaN	NaN	NaN	NaN	NaN	NaN	NaN	NaN	NaN	NaN	NaN	NaN	NaN	NaN	NaN	NaN	NaN	NaN	NaN	NaN	NaN	NaN	NaN	NaN	NaN	NaN	NaN	NaN	NaN	NaN
Q9UKN8	General transcription factor 3C polypeptide 4	GTF3C4	NaN	NaN	28.614	NaN	NaN	NaN	NaN	NaN	NaN	NaN	NaN	NaN	NaN	NaN	NaN	NaN	28.5657	27.5021	NaN	NaN	28.169	27.7806	NaN	NaN	NaN	NaN	NaN	NaN	NaN	NaN	NaN	27.6388	NaN	NaN	26.4071	NaN	NaN	27.5586	30.5707	27.309	27.9889	27.7073	NaN	28.4587	NaN	NaN	24.673
O00178	GTP-binding protein 1	GTPBP1	NaN	NaN	NaN	NaN	NaN	NaN	NaN	NaN	NaN	NaN	NaN	NaN	NaN	NaN	NaN	NaN	NaN	NaN	NaN	NaN	NaN	NaN	NaN	NaN	NaN	NaN	NaN	NaN	NaN	NaN	NaN	NaN	NaN	NaN	NaN	NaN	NaN	NaN	NaN	NaN	24.4287	NaN	NaN	NaN	NaN	NaN	NaN
Q16774	Guanylate kinase	GUK1	NaN	NaN	NaN	NaN	NaN	NaN	NaN	NaN	NaN	NaN	NaN	NaN	NaN	NaN	NaN	NaN	NaN	NaN	NaN	NaN	NaN	NaN	NaN	NaN	NaN	NaN	NaN	NaN	NaN	NaN	NaN	NaN	NaN	NaN	NaN	NaN	NaN	NaN	NaN	NaN	NaN	NaN	NaN	NaN	NaN	NaN	NaN
P08236	Beta-glucuronidase	GUSB	24.283	24.5309	NaN	24.5691	NaN	NaN	NaN	NaN	NaN	NaN	NaN	NaN	NaN	NaN	NaN	NaN	NaN	NaN	NaN	NaN	NaN	NaN	NaN	NaN	NaN	NaN	NaN	NaN	NaN	NaN	NaN	NaN	NaN	NaN	NaN	NaN	NaN	NaN	NaN	NaN	NaN	NaN	NaN	NaN	NaN	NaN	NaN
P46976	Glycogenin-1	GYG1	26.6295	NaN	25.003	26.2239	23.3151	NaN	NaN	NaN	NaN	NaN	NaN	NaN	NaN	25.0736	25.8456	25.4199	NaN	NaN	NaN	25.4611	NaN	NaN	23.7064	NaN	25.3091	NaN	NaN	NaN	NaN	NaN	NaN	NaN	23.8824	25.597	NaN	NaN	25.081	NaN	NaN	NaN	NaN	NaN	NaN	25.4877	24.9484	NaN	NaN
P13807	Glycogen [starch] synthase, muscle	GYS1	26.107	NaN	NaN	25.482	NaN	NaN	NaN	NaN	NaN	NaN	NaN	NaN	NaN	NaN	NaN	NaN	NaN	NaN	NaN	NaN	NaN	NaN	NaN	NaN	NaN	NaN	NaN	NaN	NaN	NaN	NaN	NaN	NaN	NaN	NaN	NaN	NaN	NaN	NaN	NaN	NaN	NaN	NaN	NaN	NaN	NaN	NaN
P07305	Histone H1.0;Histone H1.0, N-terminally processed	H1F0	27.7502	27.5048	26.4911	29.5228	27.3524	25.3584	NaN	NaN	NaN	24.4478	NaN	28.3216	29.6988	NaN	28.6305	29.3006	NaN	27.3551	27.6378	27.9178	26.2683	27.2387	27.9936	27.3371	26.7856	28.2478	25.3906	NaN	23.8293	NaN	NaN	NaN	NaN	29.0568	28.3738	28.6747	30.3907	25.0666	NaN	NaN	28.2112	27.4998	28.8989	28.2707	27.3549	27.5207	28.2067
Q92522	Histone H1x	H1FX	24.2746	26.2413	NaN	25.7661	25.3383	NaN	NaN	NaN	NaN	NaN	NaN	24.3129	25.9829	26.8488	27.694	NaN	24.0616	NaN	26.3525	25.2669	NaN	25.8955	25.894	26.2	NaN	25.4675	NaN	NaN	NaN	NaN	NaN	NaN	NaN	NaN	24.2268	NaN	26.3095	NaN	NaN	NaN	NaN	NaN	NaN	NaN	25.8243	26.8711	25.9465
Q71UI9;P0C0S5	Histone H2A.V;Histone H2A.Z	H2AFV;H2AFZ	28.1454	28.4078	27.2219	29.1551	NaN	26.7953	NaN	NaN	NaN	NaN	NaN	28.9342	28.8199	28.8515	28.6585	27.9392	26.9218	NaN	NaN	NaN	NaN	NaN	28.6079	27.5463	NaN	28.4792	27.961	NaN	NaN	NaN	NaN	NaN	NaN	29.4633	28.8281	NaN	28.0926	NaN	NaN	NaN	NaN	NaN	NaN	NaN	29.2223	28.7736	NaN
O75367	Core histone macro-H2A.1	H2AFY	26.2687	27.0272	NaN	26.1791	25.9066	NaN	NaN	NaN	NaN	NaN	NaN	NaN	25.655	25.2176	25.754	NaN	NaN	NaN	NaN	NaN	NaN	NaN	26.9775	24.6146	NaN	NaN	NaN	NaN	NaN	NaN	NaN	NaN	NaN	25.8458	25.8119	NaN	NaN	NaN	NaN	NaN	NaN	NaN	NaN	NaN	NaN	NaN	NaN
Q9P0M6	Core histone macro-H2A.2	H2AFY2	24.7256	24.84	NaN	24.2171	NaN	NaN	NaN	NaN	NaN	NaN	NaN	NaN	NaN	NaN	NaN	NaN	NaN	NaN	NaN	NaN	NaN	NaN	24.2167	NaN	NaN	NaN	NaN	NaN	NaN	NaN	NaN	NaN	NaN	NaN	NaN	NaN	NaN	NaN	NaN	NaN	NaN	NaN	NaN	NaN	NaN	NaN	NaN
P84243	Histone H3.3	H3F3A	30.5153	31.2274	NaN	26.0628	28.6541	27.5486	26.7136	NaN	NaN	NaN	26.7465	NaN	28.2204	27.4023	24.8783	NaN	NaN	29.2799	30.2078	29.2948	29.6232	NaN	31.4783	31.6063	28.1079	30.0312	27.8312	NaN	NaN	28.4544	27.6382	NaN	NaN	NaN	NaN	NaN	NaN	NaN	NaN	NaN	27.8988	28.205	28.0643	26.7135	27.2493	NaN	NaN
O95479	GDH/6PGL endoplasmic bifunctional protein;Glucose 1-dehydrogenase;6-phosphogluconolactonase	H6PD	23.9498	24.0841	NaN	24.5918	NaN	NaN	NaN	NaN	NaN	NaN	23.6823	NaN	NaN	NaN	NaN	NaN	25.2504	NaN	NaN	NaN	NaN	NaN	NaN	NaN	NaN	NaN	NaN	NaN	NaN	NaN	NaN	NaN	NaN	NaN	NaN	NaN	NaN	NaN	25.2295	24.9931	NaN	NaN	NaN	26.4303	NaN	NaN	NaN
Q14520	Hyaluronan-binding protein 2;Hyaluronan-binding protein 2 50 kDa heavy chain;Hyaluronan-binding protein 2 50 kDa heavy chain alternate form;Hyaluronan-binding protein 2 27 kDa light chain;Hyaluronan-binding protein 2 27 kDa light chain alternate form	HABP2	25.8169	26.1017	28.5271	26.1771	28.6204	28.3432	28.4691	29.0229	28.9445	29.2049	29.0598	28.0598	NaN	NaN	NaN	NaN	NaN	NaN	NaN	NaN	NaN	NaN	24.557	25.7476	26.2986	NaN	26.4327	NaN	27.7859	27.3312	27.8184	28.2971	28.2783	NaN	NaN	NaN	NaN	NaN	NaN	NaN	NaN	NaN	NaN	NaN	24.284	24.8974	24.7468
Q9P035	Very-long-chain (3R)-3-hydroxyacyl-CoA dehydratase 3	HACD3	NaN	NaN	NaN	NaN	NaN	NaN	NaN	NaN	NaN	NaN	NaN	27.1068	NaN	NaN	26.9567	NaN	NaN	NaN	NaN	NaN	NaN	NaN	28.5553	29.3047	NaN	NaN	NaN	NaN	NaN	NaN	NaN	NaN	NaN	NaN	27.5953	NaN	NaN	NaN	NaN	NaN	NaN	NaN	NaN	NaN	NaN	NaN	NaN
Q16836	Hydroxyacyl-coenzyme A dehydrogenase, mitochondrial	HADH	27.9653	26.4868	NaN	28.8322	NaN	NaN	NaN	NaN	NaN	NaN	NaN	NaN	NaN	NaN	24.3825	NaN	NaN	NaN	NaN	NaN	NaN	26.0165	25.3646	NaN	NaN	NaN	NaN	NaN	NaN	NaN	NaN	NaN	NaN	26.3188	NaN	NaN	NaN	NaN	NaN	NaN	NaN	NaN	NaN	NaN	NaN	NaN	NaN
P40939	Trifunctional enzyme subunit alpha, mitochondrial;Long-chain enoyl-CoA hydratase;Long chain 3-hydroxyacyl-CoA dehydrogenase	HADHA	31.243	29.7318	26.1455	31.5265	26.5508	25.8561	24.1173	25.9415	27.3535	26.1189	26.1264	24.9022	24.9947	NaN	NaN	23.7039	NaN	NaN	26.2553	26.2393	NaN	25.1556	28.3979	24.791	25.5972	25.981	NaN	25.9605	NaN	NaN	NaN	25.937	26.3153	26.7099	25.6797	NaN	26.7249	NaN	NaN	NaN	NaN	29.0432	NaN	NaN	25.7296	26.0133	NaN
P55084	Trifunctional enzyme subunit beta, mitochondrial;3-ketoacyl-CoA thiolase	HADHB	30.1882	29.5466	NaN	30.4814	NaN	NaN	NaN	NaN	NaN	24.7356	NaN	24.9442	24.7745	25.9495	NaN	24.6865	NaN	NaN	25.9358	25.2941	NaN	NaN	28.1227	23.9325	24.1509	23.84	NaN	NaN	NaN	NaN	25.2698	NaN	NaN	26.4398	24.6493	NaN	26.0016	25.4354	NaN	25.1674	NaN	26.426	NaN	25.2215	NaN	NaN	NaN
Q16775	Hydroxyacylglutathione hydrolase, mitochondrial	HAGH	25.8538	24.6907	NaN	26.7669	NaN	NaN	NaN	NaN	NaN	NaN	NaN	NaN	24.8776	NaN	25.2409	25.2818	NaN	NaN	NaN	NaN	NaN	NaN	NaN	NaN	NaN	NaN	NaN	NaN	NaN	NaN	NaN	NaN	NaN	NaN	NaN	NaN	NaN	NaN	NaN	NaN	NaN	NaN	NaN	NaN	NaN	NaN	NaN
P10915	Hyaluronan and proteoglycan link protein 1	HAPLN1	33.5977	31.2732	34.7926	30.6919	35.6098	34.7146	33.3998	34.2332	33.4025	34.3972	33.0537	36.5281	36.7997	37.1092	36.5583	36.8157	36.7319	35.7959	35.7188	36.0083	36.1257	35.7211	35.1317	35.8025	35.3188	35.5872	35.0389	34.7839	33.8181	34.3879	33.1595	34.6391	32.3504	34.9322	36.5887	35.9518	35.5496	36.1222	35.3302	35.3911	35.6859	35.9568	35.6454	35.3475	36.8641	36.8503	35.7752
Q96S86	Hyaluronan and proteoglycan link protein 3	HAPLN3	29.7972	29.3778	28.909	27.978	29.1709	28.7933	NaN	29.3568	30.2931	28.6048	27.1328	31.4118	31.9343	31.5237	31.6284	31.9281	30.8829	31.1312	30.2473	31.1849	30.744	30.7015	30.1526	29.7841	29.7122	30.8065	28.7992	30.4631	26.9428	29.3783	NaN	NaN	27.1291	31.1261	32.252	30.6389	31.8554	30.5115	NaN	30.8088	30.5147	31.3541	30.8862	31.1455	30.9025	31.2301	29.7502
P12081	Histidine--tRNA ligase, cytoplasmic	HARS	25.1085	26.3193	NaN	NaN	NaN	NaN	24.3521	NaN	NaN	NaN	24.2782	NaN	NaN	NaN	NaN	24.8044	NaN	NaN	NaN	NaN	NaN	24.9375	24.221	25.1073	NaN	25.2432	NaN	NaN	NaN	NaN	NaN	NaN	NaN	NaN	NaN	NaN	NaN	NaN	NaN	NaN	NaN	NaN	NaN	NaN	NaN	25.0586	NaN
P69905	Hemoglobin subunit alpha	HBA1	35.4839	36.0184	34.2752	34.4089	33.2336	32.3015	31.3543	31.3857	30.7759	32.0369	31.8448	32.205	34.5991	34.521	32.1866	32.4233	30.7092	31.2902	32.1901	29.9942	30.8789	30.9805	36.4353	35.7811	35.5305	34.0772	34.9846	32.9766	33.64	33.186	33.3922	32.1898	33.8992	33.8261	34.5555	33.4069	33.8382	33.7482	33.496	33.3685	32.8222	33.5942	32.4151	31.8295	35.0444	34.1914	33.7544
P68871	Hemoglobin subunit beta;LVV-hemorphin-7;Spinorphin	HBB	36.4853	37.0485	36.5782	36.3864	33.7113	34.0511	32.6731	34.1468	32.9471	33.5719	33.2839	34.2239	35.8961	37.2993	34.774	34.0734	33.1016	34.1948	33.3195	32.4384	32.0817	33.3499	37.6187	36.6544	36.6341	35.3693	35.3124	34.398	34.2006	34.2667	34.6727	34.337	35.1344	35.6804	35.0278	36.367	35.8708	35.17	34.9573	35.1343	34.7537	34.8471	35.3917	34.1589	36.6457	35.5248	35.453
P02042	Hemoglobin subunit delta	HBD	31.3987	32.5931	30.8369	31.6688	28.7479	28.05	28.1658	28.709	27.0058	28.2703	27.4874	28.5289	30.0418	32.2332	29.5508	28.1532	27.6695	29.4345	29.1267	26.5347	NaN	28.2178	33.2338	31.7004	32.05	30.7676	30.0093	28.4588	29.0487	29.0522	29.3039	28.5916	29.4905	31.1037	29.3669	31.6358	31.6751	29.5128	30.5948	30.2602	30.4054	30.6184	30.4843	30.3672	31.7787	29.9632	30.045
P69891	Hemoglobin subunit gamma-1	HBG1	26.6839	28.1467	27.8714	27.6622	24.1467	27.118	NaN	NaN	NaN	NaN	NaN	25.9267	27.6181	29.2254	NaN	NaN	NaN	25.7522	NaN	NaN	NaN	NaN	28.3362	26.4957	28.4519	27.0926	25.9177	NaN	25.693	NaN	27.12	NaN	26.7259	29.1065	27.024	NaN	29.016	NaN	27.7274	27.2388	NaN	NaN	NaN	NaN	27.9649	26.2439	NaN
P69892	Hemoglobin subunit gamma-2	HBG2	NaN	20.8073	NaN	NaN	NaN	NaN	NaN	NaN	NaN	NaN	NaN	NaN	NaN	NaN	NaN	NaN	NaN	NaN	NaN	NaN	NaN	NaN	NaN	NaN	NaN	NaN	NaN	NaN	NaN	NaN	NaN	NaN	NaN	NaN	NaN	NaN	NaN	NaN	NaN	NaN	NaN	NaN	NaN	NaN	NaN	NaN	NaN
P51610	Host cell factor 1;HCF N-terminal chain 1;HCF N-terminal chain 2;HCF N-terminal chain 3;HCF N-terminal chain 4;HCF N-terminal chain 5;HCF N-terminal chain 6;HCF C-terminal chain 1;HCF C-terminal chain 2;HCF C-terminal chain 3;HCF C-terminal chain 4;HCF C-terminal chain 5;HCF C-terminal chain 6	HCFC1	NaN	NaN	NaN	23.7409	NaN	NaN	NaN	NaN	NaN	NaN	NaN	NaN	NaN	NaN	NaN	NaN	NaN	NaN	NaN	NaN	NaN	NaN	NaN	NaN	NaN	NaN	NaN	NaN	NaN	NaN	NaN	NaN	NaN	NaN	NaN	NaN	NaN	NaN	NaN	NaN	NaN	NaN	NaN	NaN	NaN	NaN	NaN
P14317	Hematopoietic lineage cell-specific protein	HCLS1	NaN	23.9977	NaN	24.2834	NaN	NaN	NaN	NaN	NaN	NaN	NaN	NaN	NaN	NaN	NaN	NaN	NaN	NaN	NaN	NaN	NaN	NaN	NaN	NaN	NaN	NaN	NaN	NaN	NaN	NaN	NaN	NaN	NaN	NaN	NaN	NaN	NaN	NaN	NaN	NaN	NaN	NaN	NaN	NaN	NaN	NaN	NaN
Q7Z4H3	HD domain-containing protein 2	HDDC2	NaN	NaN	NaN	NaN	NaN	NaN	NaN	NaN	NaN	NaN	NaN	NaN	NaN	NaN	NaN	NaN	NaN	NaN	NaN	NaN	NaN	NaN	NaN	NaN	NaN	NaN	NaN	NaN	NaN	NaN	NaN	NaN	NaN	NaN	23.8737	NaN	NaN	NaN	NaN	NaN	NaN	NaN	NaN	NaN	NaN	NaN	NaN
P51858	Hepatoma-derived growth factor	HDGF	28.0471	28.8378	25.3516	28.4445	23.3847	23.0365	25.0826	NaN	NaN	NaN	NaN	26.8576	27.2662	26.6202	25.8621	25.2567	24.3715	26.0034	NaN	NaN	NaN	25.9078	27.82	NaN	24.5648	26.1434	24.2804	NaN	NaN	NaN	NaN	NaN	NaN	27.4886	25.9335	25.2748	27.309	24.5625	26.5983	NaN	NaN	NaN	NaN	25.3413	26.773	26.6684	25.2399
Q7Z4V5	Hepatoma-derived growth factor-related protein 2	HDGFRP2	NaN	NaN	NaN	NaN	NaN	NaN	NaN	NaN	NaN	NaN	NaN	NaN	NaN	NaN	NaN	NaN	NaN	NaN	NaN	NaN	NaN	NaN	NaN	NaN	NaN	NaN	NaN	NaN	NaN	NaN	NaN	NaN	NaN	NaN	NaN	NaN	NaN	NaN	NaN	NaN	NaN	NaN	NaN	NaN	NaN	23.3214	NaN
Q9Y3E1	Hepatoma-derived growth factor-related protein 3	HDGFRP3	NaN	NaN	NaN	26.2243	NaN	NaN	NaN	NaN	NaN	NaN	NaN	NaN	NaN	NaN	NaN	NaN	NaN	NaN	NaN	NaN	NaN	NaN	NaN	NaN	NaN	NaN	NaN	NaN	NaN	NaN	NaN	NaN	NaN	NaN	NaN	NaN	NaN	NaN	NaN	NaN	NaN	NaN	NaN	NaN	NaN	NaN	NaN
Q9H0R4	Haloacid dehalogenase-like hydrolase domain-containing protein 2	HDHD2	23.5923	23.4711	NaN	23.8042	NaN	NaN	NaN	NaN	NaN	NaN	NaN	NaN	NaN	NaN	NaN	NaN	NaN	NaN	NaN	NaN	NaN	NaN	NaN	NaN	NaN	NaN	NaN	NaN	NaN	NaN	NaN	NaN	NaN	NaN	NaN	NaN	NaN	NaN	NaN	NaN	NaN	NaN	NaN	NaN	NaN	NaN	NaN
Q9BSH5	Haloacid dehalogenase-like hydrolase domain-containing protein 3	HDHD3	NaN	NaN	NaN	NaN	NaN	NaN	NaN	NaN	NaN	NaN	NaN	NaN	NaN	NaN	NaN	NaN	NaN	NaN	NaN	NaN	NaN	NaN	NaN	NaN	NaN	NaN	NaN	NaN	NaN	NaN	NaN	NaN	NaN	NaN	NaN	NaN	NaN	NaN	NaN	NaN	NaN	NaN	NaN	NaN	NaN	NaN	NaN
Q00341	Vigilin	HDLBP	25.25	27.2225	NaN	24.6946	23.3648	NaN	NaN	NaN	NaN	NaN	NaN	NaN	NaN	NaN	24.3012	NaN	NaN	25.793	NaN	NaN	26.8797	NaN	24.4299	NaN	NaN	NaN	NaN	NaN	NaN	NaN	NaN	NaN	NaN	NaN	NaN	NaN	NaN	NaN	NaN	NaN	27.3402	NaN	24.7933	NaN	NaN	NaN	NaN
Q9NRV9	Heme-binding protein 1	HEBP1	24.6503	25.0912	NaN	NaN	NaN	NaN	NaN	NaN	NaN	NaN	NaN	NaN	NaN	NaN	NaN	NaN	NaN	NaN	NaN	NaN	NaN	NaN	NaN	NaN	NaN	NaN	NaN	NaN	NaN	NaN	NaN	NaN	NaN	NaN	NaN	NaN	NaN	NaN	NaN	NaN	NaN	NaN	NaN	NaN	NaN	NaN	NaN
Q9Y5Z4	Heme-binding protein 2	HEBP2	27.3474	26.8458	NaN	28.3132	24.1289	NaN	NaN	NaN	NaN	NaN	NaN	25.2635	26.1194	26.167	NaN	NaN	NaN	NaN	NaN	NaN	NaN	NaN	25.6614	24.9035	25.1225	27.1782	24.6188	NaN	NaN	NaN	NaN	NaN	NaN	26.4322	25.1255	NaN	NaN	NaN	NaN	NaN	NaN	NaN	NaN	NaN	NaN	NaN	NaN
P06865	Beta-hexosaminidase subunit alpha	HEXA	24.8044	25.5488	24.6421	NaN	25.4622	25.1583	26.6475	26.2845	24.8105	26.272	26.0685	24.4259	24.981	NaN	NaN	26.4096	25.6452	26.5515	26.1028	26.0402	26.3609	25.5711	25.4147	25.9559	25.6389	26.7037	27.1915	26.3691	25.3836	26.2382	NaN	26.2867	26.7102	NaN	NaN	NaN	NaN	24.7864	NaN	NaN	27.48	NaN	27.5678	26.7016	25.2468	24.3796	NaN
P07686	Beta-hexosaminidase subunit beta;Beta-hexosaminidase subunit beta chain B;Beta-hexosaminidase subunit beta chain A	HEXB	27.4966	29.2454	24.7822	26.4696	25.1001	24.6543	25.3836	NaN	25.6568	NaN	25.2029	25.7473	26.2516	25.9136	NaN	24.7617	NaN	NaN	NaN	NaN	NaN	NaN	26.6258	25.6501	25.8454	NaN	25.741	NaN	24.4413	25.5864	24.5343	NaN	NaN	26.0967	26.5992	NaN	NaN	NaN	NaN	24.0691	NaN	NaN	NaN	NaN	NaN	27.8623	24.8017
P14210	Hepatocyte growth factor;Hepatocyte growth factor alpha chain;Hepatocyte growth factor beta chain	HGF	NaN	NaN	NaN	NaN	NaN	NaN	NaN	NaN	NaN	NaN	NaN	NaN	NaN	NaN	NaN	NaN	NaN	NaN	NaN	NaN	NaN	NaN	NaN	NaN	NaN	NaN	NaN	NaN	NaN	NaN	NaN	NaN	NaN	NaN	NaN	NaN	NaN	NaN	NaN	NaN	NaN	NaN	NaN	NaN	NaN	NaN	NaN
Q04756	Hepatocyte growth factor activator;Hepatocyte growth factor activator short chain;Hepatocyte growth factor activator long chain	HGFAC	24.7134	25.085	25.6362	24.7167	27.8893	25.7269	27.1906	27.3433	26.7456	NaN	26.2089	24.7396	24.8291	NaN	NaN	NaN	NaN	NaN	NaN	NaN	NaN	NaN	24.3137	NaN	NaN	24.9799	NaN	NaN	27.0385	25.5957	25.2675	25.637	25.4338	NaN	NaN	NaN	NaN	NaN	NaN	NaN	NaN	NaN	NaN	NaN	NaN	NaN	NaN
O14964	Hepatocyte growth factor-regulated tyrosine kinase substrate	HGS	24.1574	25.0703	NaN	25.1049	NaN	NaN	NaN	NaN	NaN	NaN	NaN	NaN	NaN	NaN	NaN	NaN	NaN	NaN	NaN	NaN	NaN	NaN	NaN	NaN	NaN	NaN	NaN	NaN	NaN	NaN	NaN	NaN	NaN	NaN	NaN	NaN	NaN	NaN	NaN	NaN	NaN	NaN	NaN	NaN	NaN	NaN	NaN
Q96QV1	Hedgehog-interacting protein	HHIP	25.8154	NaN	NaN	NaN	NaN	NaN	25.5164	NaN	NaN	25.5517	NaN	NaN	NaN	NaN	NaN	26.038	27.75	28.3877	27.5638	27.7813	28.2187	28.623	26.0623	NaN	NaN	NaN	25.6674	25.8368	25.281	NaN	NaN	NaN	25.0987	NaN	NaN	NaN	NaN	25.9076	27.7229	28.1385	27.8232	NaN	27.854	27.4644	NaN	25.6854	26.2324
Q96JK4	HHIP-like protein 1	HHIPL1	24.3938	NaN	25.9595	NaN	26.7824	25.8835	28.1934	26.844	27.3738	27.9121	27.7038	27.2287	27.8891	27.2608	26.5558	28.7132	28.3339	28.6116	28.2524	28.4965	29.0593	28.7739	26.2558	27.2486	NaN	26.7866	28.2574	30.1293	27.8537	28.5956	26.7933	27.6932	27.7013	NaN	27.8456	28.0518	27.7856	28.6106	29.2645	29.2921	28.9276	28.1101	28.7429	28.243	28.3626	28.3024	28.3588
Q6UWX4	HHIP-like protein 2	HHIPL2	27.1219	25.2917	27.5104	25.5272	29.6125	28.0948	27.5853	25.9846	27.2034	28.2986	26.9705	30.8968	30.9531	31.2644	30.7661	31.941	32.0331	31.4269	32.2747	31.4788	31.651	31.6958	28.8028	29.955	29.1534	30.3826	29.3671	29.5413	28.0942	28.5018	27.9335	27.9895	27.7087	29.2944	31.5028	31.5709	30.6246	31.82	32.1559	31.6752	32.1371	31.3242	32.0077	31.1598	31.3702	31.0449	29.0367
P31937	3-hydroxyisobutyrate dehydrogenase, mitochondrial	HIBADH	24.8243	25.4402	NaN	25.601	NaN	NaN	NaN	NaN	NaN	NaN	NaN	NaN	NaN	NaN	NaN	NaN	NaN	NaN	NaN	NaN	NaN	NaN	NaN	NaN	NaN	NaN	NaN	NaN	NaN	NaN	NaN	NaN	NaN	NaN	NaN	NaN	NaN	NaN	NaN	NaN	NaN	NaN	NaN	NaN	NaN	NaN	NaN
Q6NVY1	3-hydroxyisobutyryl-CoA hydrolase, mitochondrial	HIBCH	24.3607	23.5297	NaN	NaN	NaN	NaN	NaN	NaN	NaN	NaN	NaN	NaN	NaN	NaN	NaN	NaN	NaN	NaN	NaN	NaN	NaN	NaN	NaN	NaN	NaN	NaN	NaN	NaN	NaN	NaN	NaN	NaN	NaN	NaN	NaN	NaN	NaN	NaN	NaN	NaN	NaN	NaN	NaN	NaN	NaN	NaN	NaN
Q9Y241	HIG1 domain family member 1A, mitochondrial	HIGD1A	NaN	NaN	NaN	NaN	NaN	NaN	NaN	NaN	NaN	NaN	NaN	NaN	NaN	NaN	NaN	NaN	NaN	NaN	NaN	NaN	NaN	NaN	NaN	NaN	NaN	NaN	NaN	NaN	NaN	NaN	NaN	NaN	NaN	NaN	NaN	NaN	NaN	NaN	NaN	NaN	NaN	NaN	NaN	NaN	NaN	NaN	NaN
P49773	Histidine triad nucleotide-binding protein 1	HINT1	27.4569	26.661	25.647	27.437	24.3296	NaN	NaN	NaN	NaN	NaN	NaN	NaN	25.5565	NaN	25.4193	NaN	NaN	NaN	NaN	NaN	NaN	NaN	26.4202	NaN	NaN	NaN	NaN	NaN	NaN	NaN	NaN	NaN	NaN	NaN	NaN	NaN	NaN	NaN	NaN	NaN	NaN	NaN	NaN	NaN	NaN	NaN	NaN
Q9BX68	Histidine triad nucleotide-binding protein 2, mitochondrial	HINT2	NaN	23.7494	NaN	NaN	NaN	NaN	NaN	NaN	NaN	NaN	NaN	NaN	NaN	NaN	NaN	NaN	NaN	NaN	NaN	NaN	NaN	NaN	23.1628	NaN	NaN	NaN	NaN	NaN	NaN	NaN	NaN	NaN	NaN	NaN	NaN	NaN	NaN	NaN	NaN	NaN	NaN	NaN	NaN	NaN	NaN	NaN	NaN
O00291	Huntingtin-interacting protein 1	HIP1	NaN	NaN	NaN	NaN	NaN	NaN	NaN	NaN	NaN	NaN	NaN	NaN	NaN	NaN	NaN	NaN	NaN	NaN	NaN	NaN	NaN	NaN	NaN	NaN	NaN	NaN	NaN	NaN	NaN	NaN	NaN	NaN	NaN	NaN	24.712	NaN	NaN	NaN	NaN	NaN	NaN	NaN	NaN	NaN	NaN	NaN	NaN
P16401	Histone H1.5	HIST1H1B	28.5479	27.6984	24.7681	27.8146	NaN	25.6346	NaN	NaN	NaN	25.6881	NaN	NaN	NaN	NaN	NaN	27.5754	27.9924	29.1309	NaN	27.8043	26.5951	26.415	28.1071	NaN	NaN	NaN	NaN	NaN	NaN	NaN	NaN	NaN	NaN	NaN	NaN	NaN	NaN	27.0508	28.2504	28.3585	28.8749	NaN	NaN	28.3263	27.2516	27.2601	NaN
P16403	Histone H1.2	HIST1H1C	31.6303	31.3726	28.8148	31.905	28.8232	28.5161	NaN	28.2097	27.0699	NaN	25.6766	30.4007	30.5771	30.5603	31.6555	29.4109	30.5494	29.3752	30.401	31.1531	30.1251	30.6213	31.5597	29.9056	29.4855	30.4661	28.2129	30.0926	26.2271	27.9845	27.3558	28.1115	NaN	31.0677	30.2945	NaN	32.2326	30.246	28.2799	29.7404	29.1574	30.7921	29.0043	29.9629	30.7442	31.7876	30.2756
P16402	Histone H1.3	HIST1H1D	NaN	NaN	NaN	NaN	NaN	NaN	NaN	NaN	NaN	NaN	NaN	NaN	NaN	NaN	NaN	NaN	NaN	NaN	NaN	NaN	NaN	NaN	NaN	NaN	NaN	NaN	NaN	NaN	NaN	NaN	NaN	NaN	NaN	NaN	NaN	NaN	NaN	NaN	NaN	NaN	NaN	NaN	NaN	NaN	NaN	NaN	NaN
P10412	Histone H1.4	HIST1H1E	NaN	29.2142	NaN	NaN	NaN	NaN	NaN	NaN	NaN	NaN	NaN	26.606	28.9563	NaN	NaN	NaN	NaN	NaN	NaN	NaN	NaN	NaN	NaN	NaN	NaN	NaN	NaN	NaN	NaN	NaN	NaN	NaN	NaN	29.5718	NaN	NaN	NaN	NaN	NaN	NaN	NaN	NaN	NaN	NaN	NaN	NaN	NaN
Q99880;Q99879;Q99877;Q93079;Q5QNW6;P62807;P58876;P57053;O60814;Q96A08	Histone H2B type 1-L;Histone H2B type 1-M;Histone H2B type 1-N;Histone H2B type 1-H;Histone H2B type 2-F;Histone H2B type 1-C/E/F/G/I;Histone H2B type 1-D;Histone H2B type F-S;Histone H2B type 1-K;Histone H2B type 1-A	HIST1H2BL;HIST1H2BM;HIST1H2BN;HIST1H2BH;HIST2H2BF;HIST1H2BC;HIST1H2BD;H2BFS;HIST1H2BK;HIST1H2BA	33.2813	33.7292	30.2901	33.6829	29.6862	30.0643	26.805	29.9262	28.9467	30.0016	28.4439	29.7772	32.6318	31.5769	32.4531	29.1091	30.2828	29.3651	29.8641	29.684	28.9746	29.0777	32.8504	30.5221	30.2847	31.0416	30.3073	28.6134	28.97	29.1144	29.1934	29.0922	28.1006	32.4405	32.4295	31.6004	32.4343	30.4931	30.2427	29.8344	29.9161	30.372	30.6941	29.5167	32.0196	32.3539	31.4333
P68431;Q16695	Histone H3.1;Histone H3.1t	HIST1H3A;HIST3H3	25.2244	26.2058	NaN	NaN	NaN	NaN	NaN	NaN	NaN	NaN	NaN	NaN	NaN	NaN	NaN	NaN	NaN	NaN	NaN	NaN	NaN	NaN	26.6341	NaN	NaN	NaN	NaN	NaN	NaN	NaN	NaN	NaN	NaN	NaN	NaN	NaN	NaN	NaN	NaN	NaN	NaN	NaN	NaN	NaN	NaN	NaN	NaN
P62805	Histone H4	HIST1H4A	31.7575	31.1577	28.1943	32.3984	29.8276	30.1094	27.7242	29.2741	29.322	29.7645	26.5761	31.5616	31.4484	31.8709	32.6841	31.1361	30.6547	30.2523	30.086	29.8066	30.1675	30.1913	33.2193	31.9245	30.9542	32.4635	30.7588	30.5258	29.1531	30.1326	29.2172	30.0984	28.9456	32.4138	32.321	32.1329	33.6943	31.4593	31.4898	31.5259	30.6752	31.2356	31.4138	30.45	31.9601	31.288	30.5019
Q16777;Q6FI13;Q99878;Q96KK5;Q9BTM1;Q93077;Q7L7L0;P20671;P0C0S8;P04908;Q96QV6;P16104	Histone H2A type 2-C;Histone H2A type 2-A;Histone H2A type 1-J;Histone H2A type 1-H;Histone H2A.J;Histone H2A type 1-C;Histone H2A type 3;Histone H2A type 1-D;Histone H2A type 1;Histone H2A type 1-B/E;Histone H2A type 1-A;Histone H2AX	HIST2H2AC;HIST2H2AA3;HIST1H2AJ;HIST1H2AH;H2AFJ;HIST1H2AC;HIST3H2A;HIST1H2AD;HIST1H2AG;HIST1H2AB;HIST1H2AA;H2AFX	31.8131	30.7598	29.1761	32.0608	30.319	28.9709	27.1878	28.0752	25.8843	29.1822	26.2878	28.3704	31.2657	31.5649	30.8518	30.1094	29.3876	29.4951	29.267	28.862	28.1318	29.5954	30.0536	28.4698	28.9129	30.8259	27.8771	28.8421	26.1359	27.3397	26.1031	28.194	25.4091	32.0281	31.188	NaN	29.2682	31.0901	29.8804	28.6803	27.4459	28.383	NaN	27.3508	29.5013	30.2238	28.5004
Q16778;P33778;P23527;P06899;Q8N257	Histone H2B type 2-E;Histone H2B type 1-B;Histone H2B type 1-O;Histone H2B type 1-J;Histone H2B type 3-B	HIST2H2BE;HIST1H2BB;HIST1H2BO;HIST1H2BJ;HIST3H2BB	29.2373	29.6101	NaN	30.4743	NaN	NaN	NaN	NaN	NaN	NaN	NaN	NaN	NaN	NaN	NaN	NaN	NaN	NaN	NaN	NaN	NaN	NaN	29.0183	NaN	NaN	NaN	NaN	NaN	NaN	NaN	NaN	NaN	NaN	NaN	NaN	NaN	NaN	NaN	NaN	NaN	NaN	NaN	NaN	NaN	NaN	29.3881	NaN
Q71DI3	Histone H3.2	HIST2H3A	NaN	25.1331	NaN	NaN	NaN	NaN	NaN	NaN	NaN	NaN	NaN	NaN	NaN	NaN	NaN	NaN	NaN	NaN	NaN	NaN	NaN	NaN	26.3603	NaN	NaN	NaN	NaN	NaN	NaN	NaN	NaN	NaN	NaN	NaN	NaN	NaN	NaN	NaN	NaN	NaN	NaN	NaN	NaN	NaN	NaN	NaN	NaN
P19367	Hexokinase-1	HK1	28.8924	27.5122	NaN	26.8237	NaN	NaN	NaN	NaN	NaN	NaN	NaN	NaN	NaN	NaN	NaN	NaN	NaN	NaN	NaN	NaN	NaN	NaN	NaN	NaN	NaN	NaN	NaN	NaN	NaN	NaN	NaN	NaN	NaN	NaN	NaN	NaN	NaN	NaN	NaN	NaN	NaN	29.3699	NaN	NaN	NaN	26.7256	NaN
P52790	Hexokinase-3	HK3	NaN	NaN	NaN	NaN	NaN	NaN	NaN	NaN	NaN	NaN	NaN	NaN	NaN	NaN	NaN	NaN	NaN	NaN	NaN	NaN	NaN	NaN	NaN	NaN	NaN	NaN	NaN	NaN	NaN	NaN	NaN	NaN	NaN	NaN	NaN	NaN	NaN	NaN	NaN	NaN	NaN	NaN	NaN	NaN	NaN	NaN	NaN
P01892	HLA class I histocompatibility antigen, A-2 alpha chain	HLA-A	25.762	25.5954	23.5789	25.2952	NaN	NaN	NaN	NaN	NaN	NaN	NaN	NaN	NaN	NaN	NaN	NaN	NaN	NaN	NaN	NaN	NaN	NaN	24.6884	NaN	NaN	NaN	NaN	NaN	NaN	NaN	NaN	NaN	NaN	NaN	25.3596	NaN	NaN	NaN	NaN	NaN	NaN	NaN	NaN	NaN	NaN	24.5273	NaN
P04439;P13746;P30455;P30443;P05534;P30447	HLA class I histocompatibility antigen, A-3 alpha chain;HLA class I histocompatibility antigen, A-11 alpha chain;HLA class I histocompatibility antigen, A-36 alpha chain;HLA class I histocompatibility antigen, A-1 alpha chain;HLA class I histocompatibility antigen, A-24 alpha chain;HLA class I histocompatibility antigen, A-23 alpha chain	HLA-A	27.8578	28.3697	25.792	27.4494	24.2961	NaN	24.4176	NaN	24.6405	NaN	24.3531	NaN	NaN	NaN	NaN	NaN	NaN	NaN	NaN	NaN	NaN	NaN	25.8895	26.6811	27.4617	25.9742	25.2345	NaN	24.3913	NaN	27.1915	25.0983	NaN	NaN	NaN	NaN	NaN	24.534	NaN	NaN	NaN	NaN	NaN	NaN	26.0649	24.926	25.9336
P10316	HLA class I histocompatibility antigen, A-69 alpha chain	HLA-A	NaN	NaN	NaN	26.9266	NaN	NaN	NaN	NaN	NaN	NaN	NaN	NaN	NaN	NaN	NaN	NaN	NaN	NaN	NaN	NaN	NaN	NaN	NaN	NaN	NaN	NaN	NaN	NaN	NaN	NaN	NaN	NaN	NaN	NaN	NaN	NaN	NaN	NaN	NaN	NaN	NaN	NaN	NaN	NaN	NaN	NaN	NaN
P10319;P18465	HLA class I histocompatibility antigen, B-58 alpha chain;HLA class I histocompatibility antigen, B-57 alpha chain	HLA-B	NaN	NaN	NaN	NaN	NaN	23.0917	NaN	NaN	NaN	NaN	NaN	NaN	NaN	NaN	NaN	NaN	NaN	NaN	NaN	NaN	NaN	NaN	NaN	NaN	NaN	NaN	NaN	NaN	NaN	NaN	NaN	NaN	NaN	NaN	NaN	NaN	NaN	NaN	NaN	NaN	NaN	NaN	NaN	NaN	NaN	NaN	NaN
P30462;P18463;Q29718;P30480;P30460;P01889;Q31610;P30486;P30461	HLA class I histocompatibility antigen, B-14 alpha chain;HLA class I histocompatibility antigen, B-37 alpha chain;HLA class I histocompatibility antigen, B-82 alpha chain;HLA class I histocompatibility antigen, B-42 alpha chain;HLA class I histocompatibility antigen, B-8 alpha chain;HLA class I histocompatibility antigen, B-7 alpha chain;HLA class I histocompatibility antigen, B-81 alpha chain;HL…	HLA-B	NaN	NaN	NaN	NaN	NaN	NaN	NaN	NaN	NaN	NaN	NaN	NaN	NaN	NaN	NaN	NaN	NaN	NaN	NaN	NaN	NaN	NaN	NaN	NaN	NaN	NaN	NaN	NaN	NaN	NaN	NaN	NaN	NaN	NaN	NaN	NaN	NaN	NaN	NaN	NaN	NaN	NaN	NaN	NaN	NaN	NaN	NaN
P30481;P30483;P30488;P30487;P30485;P03989	HLA class I histocompatibility antigen, B-44 alpha chain;HLA class I histocompatibility antigen, B-45 alpha chain;HLA class I histocompatibility antigen, B-50 alpha chain;HLA class I histocompatibility antigen, B-49 alpha chain;HLA class I histocompatibility antigen, B-47 alpha chain;HLA class I histocompatibility antigen, B-27 alpha chain	HLA-B	26.2192	26.5859	25.0217	25.6604	23.9257	25.7035	NaN	NaN	NaN	NaN	NaN	NaN	NaN	NaN	NaN	NaN	NaN	NaN	NaN	NaN	NaN	NaN	NaN	NaN	25.4171	25.2277	24.8807	NaN	24.1818	NaN	25.7395	24.6191	NaN	NaN	24.6561	NaN	NaN	NaN	NaN	NaN	NaN	NaN	NaN	NaN	25.5198	26.1548	NaN
P30504	HLA class I histocompatibility antigen, Cw-4 alpha chain	HLA-C	NaN	NaN	NaN	NaN	NaN	NaN	NaN	NaN	NaN	NaN	NaN	NaN	NaN	NaN	NaN	NaN	NaN	NaN	NaN	NaN	NaN	NaN	NaN	NaN	NaN	NaN	NaN	NaN	NaN	NaN	NaN	NaN	NaN	NaN	NaN	NaN	NaN	NaN	NaN	NaN	NaN	NaN	NaN	NaN	NaN	NaN	NaN
P20036	HLA class II histocompatibility antigen, DP alpha 1 chain	HLA-DPA1	22.8255	23.2415	NaN	NaN	NaN	NaN	NaN	NaN	NaN	NaN	NaN	NaN	NaN	NaN	NaN	NaN	NaN	NaN	NaN	NaN	NaN	NaN	NaN	NaN	NaN	NaN	NaN	NaN	NaN	NaN	NaN	NaN	NaN	NaN	NaN	NaN	NaN	NaN	NaN	NaN	NaN	NaN	NaN	NaN	NaN	NaN	NaN
P01903	HLA class II histocompatibility antigen, DR alpha chain	HLA-DRA	27.0629	27.5854	26.1831	26.9444	24.0894	24.8302	25.2468	NaN	NaN	NaN	NaN	23.5483	24.4615	NaN	NaN	NaN	NaN	NaN	NaN	NaN	NaN	NaN	25.7158	NaN	27.052	NaN	NaN	NaN	26.1495	NaN	27.1371	NaN	25.8959	NaN	NaN	NaN	NaN	NaN	NaN	NaN	NaN	NaN	NaN	NaN	NaN	26.0038	25.3422
P20039	HLA class II histocompatibility antigen, DRB1-11 beta chain	HLA-DRB1	NaN	25.1992	24.1469	24.7576	NaN	NaN	NaN	NaN	NaN	NaN	NaN	NaN	NaN	NaN	NaN	NaN	NaN	NaN	NaN	NaN	NaN	NaN	NaN	NaN	NaN	NaN	NaN	NaN	NaN	NaN	NaN	NaN	NaN	NaN	NaN	NaN	NaN	NaN	NaN	NaN	NaN	NaN	NaN	NaN	NaN	NaN	NaN
Q95IE3	HLA class II histocompatibility antigen, DRB1-12 beta chain	HLA-DRB1	NaN	NaN	NaN	NaN	NaN	NaN	NaN	NaN	NaN	NaN	NaN	NaN	NaN	NaN	NaN	NaN	NaN	NaN	NaN	NaN	NaN	NaN	NaN	NaN	NaN	NaN	NaN	NaN	NaN	NaN	NaN	NaN	NaN	NaN	NaN	NaN	NaN	NaN	NaN	NaN	NaN	NaN	NaN	NaN	NaN	NaN	NaN
Q9TQE0	HLA class II histocompatibility antigen, DRB1-9 beta chain	HLA-DRB1	NaN	NaN	NaN	NaN	NaN	NaN	NaN	NaN	NaN	NaN	NaN	NaN	NaN	NaN	NaN	NaN	NaN	NaN	NaN	NaN	NaN	NaN	NaN	NaN	NaN	NaN	NaN	NaN	NaN	NaN	NaN	NaN	NaN	NaN	NaN	NaN	NaN	NaN	NaN	NaN	NaN	NaN	NaN	NaN	NaN	NaN	NaN
P04229;Q30154;P13760;Q30134;P79483;P13761	HLA class II histocompatibility antigen, DRB1-1 beta chain;HLA class II histocompatibility antigen, DR beta 5 chain;HLA class II histocompatibility antigen, DRB1-4 beta chain;HLA class II histocompatibility antigen, DRB1-8 beta chain;HLA class II histocompatibility antigen, DR beta 3 chain;HLA class II histocompatibility antigen, DRB1-7 beta chain	HLA-DRB1;HLA-DRB5;HLA-DRB3	26.7886	27.3932	27.1122	26.5511	24.6251	25.1637	NaN	NaN	NaN	NaN	NaN	25.5007	NaN	NaN	NaN	NaN	NaN	NaN	NaN	NaN	NaN	NaN	NaN	NaN	27.0721	NaN	NaN	NaN	NaN	NaN	27.2529	NaN	26.6195	27.444	NaN	NaN	24.4133	NaN	NaN	NaN	NaN	25.8718	23.6298	NaN	NaN	NaN	NaN
P17693	HLA class I histocompatibility antigen, alpha chain G	HLA-G	NaN	NaN	NaN	NaN	NaN	NaN	NaN	NaN	NaN	NaN	NaN	NaN	NaN	NaN	NaN	NaN	NaN	NaN	NaN	NaN	NaN	NaN	NaN	NaN	NaN	NaN	NaN	NaN	NaN	NaN	NaN	NaN	NaN	NaN	NaN	NaN	NaN	NaN	NaN	NaN	NaN	NaN	NaN	NaN	NaN	NaN	NaN
P08397	Porphobilinogen deaminase	HMBS	23.7328	NaN	NaN	NaN	NaN	NaN	NaN	NaN	NaN	NaN	NaN	NaN	NaN	NaN	NaN	NaN	NaN	NaN	NaN	NaN	NaN	NaN	NaN	NaN	NaN	NaN	NaN	NaN	NaN	NaN	NaN	NaN	NaN	NaN	NaN	NaN	NaN	NaN	NaN	NaN	NaN	NaN	NaN	NaN	NaN	NaN	NaN
Q96RW7	Hemicentin-1	HMCN1	25.886	28.3393	27.1341	26.428	25.3533	25.7049	26.1371	26.1737	NaN	25.9353	26.566	NaN	25.7868	26.8827	NaN	27.3476	NaN	NaN	26.854	NaN	NaN	25.886	28.2385	NaN	NaN	NaN	23.9518	NaN	26.5731	25.4617	NaN	NaN	27.2072	NaN	27.0525	26.5061	28.6358	26.5409	27.2242	NaN	NaN	27.4986	25.8328	25.0344	25.7808	NaN	26.962
P17096	High mobility group protein HMG-I/HMG-Y	HMGA1	NaN	NaN	NaN	NaN	NaN	NaN	NaN	NaN	NaN	NaN	NaN	NaN	NaN	NaN	NaN	NaN	NaN	NaN	NaN	NaN	NaN	NaN	NaN	NaN	NaN	NaN	NaN	NaN	NaN	NaN	NaN	NaN	NaN	NaN	NaN	NaN	NaN	NaN	NaN	NaN	NaN	NaN	NaN	NaN	NaN	NaN	NaN
P09429	High mobility group protein B1	HMGB1	27.6134	28.0224	NaN	27.5193	27.7279	23.6801	NaN	NaN	NaN	NaN	NaN	26.3046	27.069	NaN	26.1998	25.113	NaN	NaN	27.3308	27.355	NaN	NaN	28.4542	NaN	NaN	NaN	NaN	28.2339	NaN	26.921	27.9297	NaN	NaN	NaN	25.6614	NaN	NaN	NaN	NaN	NaN	NaN	NaN	NaN	NaN	27.29	27.8348	25.7138
P26583	High mobility group protein B2	HMGB2	NaN	NaN	NaN	NaN	NaN	NaN	NaN	NaN	NaN	NaN	NaN	NaN	NaN	NaN	NaN	NaN	NaN	NaN	NaN	NaN	NaN	NaN	NaN	NaN	NaN	NaN	NaN	NaN	NaN	NaN	NaN	NaN	NaN	NaN	NaN	NaN	NaN	NaN	NaN	NaN	NaN	NaN	NaN	NaN	25.6281	24.1929	NaN
P82970	High mobility group nucleosome-binding domain-containing protein 5	HMGN5	NaN	NaN	NaN	23.4629	NaN	NaN	NaN	NaN	NaN	NaN	NaN	NaN	NaN	NaN	NaN	NaN	NaN	NaN	NaN	NaN	NaN	NaN	NaN	NaN	NaN	NaN	NaN	NaN	NaN	NaN	NaN	NaN	NaN	NaN	NaN	NaN	NaN	NaN	NaN	NaN	NaN	NaN	NaN	NaN	NaN	NaN	NaN
P09601	Heme oxygenase 1	HMOX1	24.6345	25.5516	NaN	25.5843	NaN	NaN	NaN	NaN	NaN	NaN	NaN	NaN	NaN	NaN	NaN	NaN	NaN	NaN	NaN	NaN	NaN	NaN	24.611	23.8787	NaN	NaN	NaN	NaN	NaN	NaN	NaN	NaN	NaN	NaN	NaN	NaN	NaN	NaN	NaN	NaN	NaN	NaN	NaN	NaN	NaN	NaN	NaN
P30519	Heme oxygenase 2	HMOX2	NaN	NaN	NaN	NaN	NaN	NaN	NaN	NaN	NaN	NaN	NaN	NaN	NaN	NaN	NaN	NaN	NaN	NaN	NaN	NaN	NaN	NaN	NaN	NaN	NaN	NaN	NaN	NaN	NaN	NaN	NaN	NaN	NaN	NaN	NaN	NaN	NaN	NaN	NaN	NaN	NaN	NaN	NaN	NaN	NaN	NaN	NaN
P50135	Histamine N-methyltransferase	HNMT	NaN	24.5261	NaN	NaN	NaN	NaN	NaN	NaN	NaN	NaN	NaN	NaN	NaN	NaN	NaN	NaN	NaN	NaN	NaN	NaN	NaN	NaN	NaN	NaN	24.8773	NaN	NaN	NaN	NaN	NaN	NaN	NaN	NaN	NaN	NaN	NaN	NaN	NaN	NaN	NaN	NaN	NaN	NaN	NaN	NaN	NaN	NaN
Q13151	Heterogeneous nuclear ribonucleoprotein A0	HNRNPA0	NaN	24.094	NaN	25.6353	NaN	NaN	NaN	NaN	NaN	NaN	NaN	NaN	NaN	NaN	NaN	NaN	NaN	NaN	25.267	NaN	NaN	NaN	NaN	NaN	NaN	NaN	NaN	NaN	NaN	NaN	NaN	NaN	NaN	NaN	24.6693	NaN	NaN	NaN	NaN	NaN	NaN	NaN	NaN	NaN	NaN	NaN	NaN
P09651;Q32P51	Heterogeneous nuclear ribonucleoprotein A1;Heterogeneous nuclear ribonucleoprotein A1, N-terminally processed;Heterogeneous nuclear ribonucleoprotein A1-like 2	HNRNPA1;HNRNPA1L2	28.6199	29.4746	25.6199	29.1527	24.809	24.8512	26.1172	NaN	NaN	24.1389	NaN	25.3752	28.1341	26.6457	26.772	24.711	NaN	NaN	NaN	NaN	NaN	NaN	29.0843	25.5426	26.906	25.9508	NaN	NaN	24.717	NaN	25.368	NaN	NaN	27.5335	26.9352	NaN	28.1255	NaN	NaN	NaN	24.779	NaN	NaN	NaN	26.0685	25.6716	26.1305
P22626	Heterogeneous nuclear ribonucleoproteins A2/B1	HNRNPA2B1	28.9801	30.1714	26.3003	30.1343	25.6107	25.0679	24.1698	NaN	NaN	25.5138	NaN	27.8928	28.8139	29.0402	29.5322	26.2237	27.1852	27.2392	26.5951	26.7735	25.6338	26.522	29.2332	26.1779	27.0389	26.9965	25.7687	NaN	NaN	NaN	NaN	25.0368	NaN	29.6062	28.2513	26.7823	28.1791	27.4982	NaN	NaN	NaN	NaN	27.1406	26.4601	27.8006	28.2437	26.3113
P51991	Heterogeneous nuclear ribonucleoprotein A3	HNRNPA3	27.5811	28.4325	NaN	29.2537	NaN	24.495	NaN	NaN	NaN	NaN	NaN	26.5759	27.2969	27.2457	26.0417	25.4867	NaN	NaN	25.4119	24.6398	NaN	NaN	27.6801	25.6433	25.7187	NaN	NaN	NaN	NaN	NaN	NaN	NaN	NaN	27.4713	26.8738	NaN	26.3252	NaN	NaN	NaN	NaN	NaN	NaN	NaN	27.3827	27.7068	25.9095
Q99729	Heterogeneous nuclear ribonucleoprotein A/B	HNRNPAB	NaN	NaN	NaN	24.7559	NaN	NaN	NaN	NaN	NaN	NaN	NaN	NaN	NaN	NaN	NaN	NaN	NaN	NaN	NaN	NaN	NaN	NaN	NaN	NaN	NaN	NaN	NaN	NaN	NaN	NaN	NaN	NaN	NaN	NaN	NaN	NaN	NaN	NaN	NaN	NaN	NaN	NaN	NaN	NaN	NaN	24.2133	NaN
P07910	Heterogeneous nuclear ribonucleoproteins C1/C2	HNRNPC	28.3052	28.5892	NaN	28.3326	23.6237	24.1389	NaN	24.8413	23.8497	25.3828	NaN	26.7797	27.3393	27.3891	26.9284	NaN	NaN	NaN	NaN	NaN	NaN	NaN	27.7244	25.3627	26.141	25.929	24.5444	NaN	25.203	NaN	NaN	NaN	NaN	26.6803	26.2426	NaN	27.3506	25.9654	NaN	NaN	NaN	24.3647	NaN	NaN	26.1459	26.9431	25.1244
Q14103	Heterogeneous nuclear ribonucleoprotein D0	HNRNPD	28.2772	28.47	NaN	27.8794	25.1935	NaN	NaN	NaN	NaN	NaN	NaN	25.6117	27.444	26.9417	27.2711	25.3348	NaN	NaN	25.5344	NaN	NaN	24.3836	26.8561	25.6391	25.3394	NaN	25.2518	NaN	NaN	NaN	NaN	NaN	NaN	26.8606	25.7546	NaN	NaN	NaN	NaN	NaN	NaN	NaN	NaN	NaN	25.657	NaN	26.1315
O14979	Heterogeneous nuclear ribonucleoprotein D-like	HNRNPDL	24.9114	24.7911	NaN	NaN	NaN	NaN	NaN	NaN	NaN	NaN	NaN	NaN	NaN	NaN	NaN	NaN	NaN	NaN	NaN	NaN	NaN	NaN	NaN	NaN	NaN	NaN	NaN	NaN	NaN	NaN	NaN	NaN	NaN	NaN	NaN	NaN	NaN	NaN	NaN	NaN	NaN	NaN	NaN	NaN	NaN	NaN	NaN
P52597	Heterogeneous nuclear ribonucleoprotein F;Heterogeneous nuclear ribonucleoprotein F, N-terminally processed	HNRNPF	24.962	25.215	NaN	26.1043	NaN	NaN	NaN	NaN	NaN	NaN	NaN	NaN	NaN	NaN	NaN	NaN	NaN	NaN	NaN	NaN	NaN	NaN	25.3784	NaN	NaN	NaN	NaN	NaN	26.107	NaN	NaN	NaN	NaN	NaN	NaN	NaN	NaN	NaN	NaN	NaN	NaN	NaN	NaN	NaN	NaN	NaN	NaN
P31943	Heterogeneous nuclear ribonucleoprotein H;Heterogeneous nuclear ribonucleoprotein H, N-terminally processed	HNRNPH1	28.0797	28.0756	NaN	27.6333	24.9237	25.6258	NaN	NaN	NaN	NaN	NaN	26.3184	26.4709	25.2898	26.626	NaN	NaN	25.1818	NaN	NaN	NaN	NaN	27.216	NaN	25.4702	NaN	NaN	NaN	NaN	NaN	NaN	NaN	NaN	27.3708	25.4791	NaN	NaN	NaN	NaN	NaN	NaN	NaN	NaN	NaN	NaN	26.3199	NaN
P55795	Heterogeneous nuclear ribonucleoprotein H2	HNRNPH2	NaN	NaN	NaN	24.17	NaN	NaN	NaN	NaN	NaN	NaN	NaN	NaN	NaN	NaN	NaN	NaN	NaN	NaN	NaN	NaN	NaN	NaN	NaN	NaN	NaN	NaN	NaN	NaN	NaN	NaN	NaN	NaN	NaN	NaN	NaN	NaN	NaN	NaN	NaN	NaN	NaN	NaN	NaN	NaN	NaN	NaN	NaN
P31942	Heterogeneous nuclear ribonucleoprotein H3	HNRNPH3	26.4912	26.5243	NaN	26.6554	NaN	NaN	NaN	NaN	NaN	NaN	NaN	26.0151	NaN	25.5422	25.9778	NaN	NaN	NaN	NaN	NaN	NaN	NaN	25.3835	NaN	NaN	NaN	NaN	NaN	NaN	NaN	NaN	NaN	NaN	NaN	NaN	NaN	NaN	NaN	NaN	NaN	NaN	NaN	NaN	NaN	NaN	25.2028	NaN
P61978	Heterogeneous nuclear ribonucleoprotein K	HNRNPK	29.4237	30.2476	26.2281	29.8503	24.1756	25.6326	NaN	NaN	NaN	NaN	NaN	27.2	27.7278	27.9272	28.0528	26.8573	26.9633	26.0145	27.015	26.2041	25.2179	27.059	29.0481	25.2183	26.4005	25.6834	NaN	NaN	NaN	NaN	24.399	NaN	NaN	29.2266	27.2922	25.6119	29.286	27.3149	27.0969	25.7327	26.9394	NaN	NaN	26.6475	27.3538	28.2945	27.3275
P14866	Heterogeneous nuclear ribonucleoprotein L	HNRNPL	26.3572	26.4445	NaN	26.1835	22.8677	NaN	NaN	NaN	NaN	NaN	NaN	24.4288	NaN	24.6101	24.7656	NaN	NaN	NaN	NaN	NaN	NaN	NaN	NaN	NaN	NaN	NaN	NaN	NaN	NaN	NaN	NaN	NaN	NaN	NaN	NaN	NaN	NaN	NaN	NaN	NaN	NaN	22.4024	NaN	NaN	NaN	24.4394	NaN
Q8WVV9	Heterogeneous nuclear ribonucleoprotein L-like	HNRNPLL	NaN	NaN	NaN	NaN	NaN	NaN	NaN	NaN	NaN	NaN	NaN	NaN	NaN	NaN	NaN	NaN	NaN	NaN	NaN	NaN	NaN	NaN	NaN	NaN	NaN	NaN	NaN	NaN	NaN	NaN	NaN	NaN	NaN	NaN	NaN	NaN	NaN	NaN	NaN	NaN	NaN	NaN	NaN	NaN	NaN	NaN	NaN
P52272	Heterogeneous nuclear ribonucleoprotein M	HNRNPM	27.7641	28.8328	NaN	26.8259	NaN	NaN	NaN	NaN	NaN	24.3026	NaN	25.3692	26.8154	NaN	25.3579	25.4241	NaN	25.3039	NaN	NaN	NaN	25.5069	27.2069	24.9818	NaN	NaN	25.748	23.6263	NaN	NaN	NaN	25.4481	NaN	27.0059	26.1256	NaN	NaN	NaN	26.9258	NaN	NaN	24.0503	NaN	NaN	NaN	25.9138	NaN
O43390	Heterogeneous nuclear ribonucleoprotein R	HNRNPR	28.8419	29.308	22.3154	27.654	23.8285	NaN	NaN	26.5174	NaN	NaN	23.1498	25.3998	26.5373	25.3817	26.8584	NaN	NaN	NaN	NaN	25.0267	NaN	NaN	27.5154	25.7988	NaN	25.5984	NaN	NaN	NaN	NaN	NaN	NaN	NaN	26.8195	25.5043	NaN	NaN	NaN	NaN	NaN	NaN	NaN	NaN	NaN	25.3439	26.1084	23.9226
Q00839	Heterogeneous nuclear ribonucleoprotein U	HNRNPU	28.245	28.7629	NaN	27.6808	23.0347	NaN	NaN	NaN	NaN	NaN	NaN	26.5533	26.8506	26.8862	27.6274	NaN	25.4241	25.869	25.3289	NaN	NaN	NaN	27.1726	25.1705	NaN	NaN	NaN	NaN	NaN	NaN	NaN	NaN	NaN	27.6543	26.3524	NaN	26.8534	NaN	NaN	NaN	NaN	NaN	NaN	NaN	25.8888	26.0759	NaN
Q9BUJ2	Heterogeneous nuclear ribonucleoprotein U-like protein 1	HNRNPUL1	NaN	NaN	NaN	NaN	NaN	NaN	NaN	NaN	NaN	NaN	NaN	NaN	NaN	NaN	NaN	NaN	NaN	NaN	NaN	NaN	NaN	NaN	NaN	NaN	NaN	NaN	NaN	NaN	NaN	NaN	NaN	NaN	NaN	NaN	NaN	NaN	NaN	NaN	NaN	NaN	NaN	NaN	NaN	NaN	NaN	NaN	NaN
Q1KMD3	Heterogeneous nuclear ribonucleoprotein U-like protein 2	HNRNPUL2	25.563	27.5705	NaN	26.674	NaN	25.0405	NaN	25.0667	NaN	NaN	NaN	24.2821	24.3429	NaN	NaN	27.0203	NaN	NaN	NaN	NaN	27.2931	NaN	25.7824	25.2846	NaN	NaN	26.0543	NaN	NaN	NaN	NaN	26.9799	NaN	25.4866	25.0159	NaN	NaN	25.117	NaN	NaN	NaN	NaN	NaN	NaN	NaN	NaN	NaN
Q86VS8	Protein Hook homolog 3	HOOK3	NaN	22.2707	NaN	NaN	NaN	NaN	NaN	NaN	NaN	NaN	NaN	NaN	NaN	NaN	NaN	NaN	NaN	NaN	NaN	NaN	NaN	NaN	NaN	NaN	NaN	NaN	NaN	NaN	NaN	NaN	NaN	NaN	NaN	NaN	NaN	NaN	NaN	NaN	NaN	NaN	NaN	NaN	NaN	NaN	NaN	NaN	NaN
Q9GZZ0	Homeobox protein Hox-D1	HOXD1	27.4078	26.6954	30.8519	25.7794	29.8132	31.2355	28.4128	30.7624	30.6034	NaN	30.0742	31.5559	NaN	NaN	NaN	NaN	NaN	NaN	NaN	NaN	NaN	NaN	26.6033	28.8694	29.411	28.0517	26.0302	30.4494	31.3635	28.9782	31.6864	27.8434	31.4154	NaN	23.2067	NaN	NaN	NaN	NaN	NaN	NaN	NaN	NaN	NaN	NaN	NaN	31.0837
P00738	Haptoglobin;Haptoglobin alpha chain;Haptoglobin beta chain	HP	34.3197	34.5898	34.5527	34.8048	37.1753	35.7266	36.0419	35.55	35.6459	35.7922	36.3424	34.9589	28.9867	28.3293	26.8895	24.0043	28.5915	29.5897	28.7085	27.4011	28.7235	NaN	33.5627	32.8871	34.0653	32.8937	34.2509	33.9936	35.8101	34.9228	35.1003	34.7929	35.1017	29.0052	28.7617	27.4336	29.3735	28.6756	28.512	28.7891	29.433	28.4961	29.12	29.3138	31.2832	32.6208	31.1298
Q5SSJ5	Heterochromatin protein 1-binding protein 3	HP1BP3	26.9365	26.7918	26.8895	26.8701	26.1185	25.2267	26.577	25.6257	NaN	NaN	NaN	25.528	26.5916	NaN	26.6096	24.9318	NaN	NaN	NaN	NaN	25.3426	NaN	26.1914	NaN	NaN	NaN	NaN	NaN	NaN	NaN	27.2503	25.2879	NaN	26.8917	25.678	NaN	NaN	NaN	NaN	NaN	NaN	NaN	NaN	NaN	25.6166	26.9666	26.2528
P37235;P84074	Hippocalcin-like protein 1;Neuron-specific calcium-binding protein hippocalcin	HPCAL1;HPCA	23.7674	NaN	NaN	NaN	NaN	NaN	NaN	NaN	NaN	NaN	NaN	NaN	NaN	NaN	NaN	NaN	NaN	NaN	NaN	NaN	NaN	NaN	NaN	NaN	NaN	NaN	NaN	NaN	NaN	NaN	NaN	NaN	NaN	NaN	NaN	NaN	NaN	NaN	NaN	NaN	NaN	NaN	NaN	NaN	NaN	NaN	NaN
P00739	Haptoglobin-related protein	HPR	27.4118	27.4917	29.4886	25.95	29.6511	30.1151	28.821	29.659	29.8186	28.4676	30.1587	29.2936	NaN	NaN	NaN	NaN	NaN	25.6049	26.4524	NaN	NaN	NaN	25.9783	27.2468	27.714	26.3435	24.8005	27.1429	29.6688	27.8347	31.0197	27.3178	30.0347	NaN	23.8083	NaN	NaN	NaN	NaN	NaN	NaN	NaN	NaN	NaN	NaN	24.6676	26.8333
P00492	Hypoxanthine-guanine phosphoribosyltransferase	HPRT1	24.3639	25.0615	NaN	22.9838	NaN	NaN	NaN	NaN	NaN	NaN	NaN	22.4619	23.0316	NaN	NaN	NaN	NaN	NaN	NaN	NaN	NaN	NaN	23.7527	NaN	NaN	NaN	NaN	NaN	NaN	NaN	NaN	NaN	NaN	NaN	NaN	NaN	NaN	NaN	NaN	NaN	NaN	NaN	NaN	NaN	NaN	NaN	NaN
P02790	Hemopexin	HPX	34.3449	34.2605	33.792	34.1128	35.9111	34.8747	36.5537	35.0763	35.1926	35.5614	36.0098	32.6566	30.2734	29.8065	29.2102	23.2845	22.9142	22.5884	25.418	NaN	NaN	24.5717	32.8365	33.1594	33.3509	33.288	34.542	33.5764	35.5023	35.2816	34.5296	35.2865	34.8852	31.7443	28.9112	23.8161	29.9978	26.3001	26.8536	26.6506	24.5763	22.7407	NaN	NaN	30.0345	32.6024	30.563
P01112;P01111	GTPase HRas;GTPase HRas, N-terminally processed;GTPase NRas	HRAS;NRAS	23.2151	NaN	NaN	NaN	NaN	NaN	NaN	NaN	NaN	NaN	NaN	NaN	NaN	NaN	NaN	NaN	NaN	NaN	NaN	NaN	NaN	NaN	NaN	NaN	NaN	NaN	NaN	NaN	NaN	NaN	NaN	NaN	NaN	NaN	NaN	NaN	NaN	NaN	25.401	NaN	NaN	NaN	NaN	NaN	NaN	NaN	NaN
P23327	Sarcoplasmic reticulum histidine-rich calcium-binding protein	HRC	26.3006	NaN	NaN	26.4809	NaN	NaN	NaN	NaN	NaN	NaN	NaN	NaN	NaN	NaN	NaN	NaN	NaN	NaN	NaN	NaN	NaN	NaN	NaN	NaN	NaN	NaN	NaN	NaN	NaN	NaN	NaN	NaN	NaN	NaN	NaN	NaN	NaN	NaN	NaN	NaN	NaN	NaN	NaN	NaN	NaN	NaN	NaN
P04196	Histidine-rich glycoprotein	HRG	29.7744	30.5423	33.3574	29.2989	33.4673	33.4707	32.2863	32.5104	32.6738	32.3618	32.3444	30.0518	27.8077	NaN	25.7345	NaN	22.4404	23.2289	21.5144	NaN	22.3456	NaN	29.2573	31.0158	32.523	29.6941	31.2272	30.202	32.6442	31.2393	33.8977	31.3543	33.3564	27.5494	25.6215	NaN	28.5157	26.1807	26.541	NaN	NaN	NaN	NaN	25.1582	28.1933	29.0311	31.2212
CON__Q86YZ3;Q86YZ3	Hornerin	HRNR	NaN	NaN	NaN	NaN	NaN	NaN	NaN	NaN	NaN	NaN	NaN	NaN	NaN	30.2472	27.7337	NaN	30.8388	NaN	NaN	NaN	NaN	NaN	NaN	NaN	NaN	NaN	NaN	NaN	NaN	NaN	NaN	NaN	NaN	NaN	NaN	NaN	NaN	NaN	NaN	NaN	NaN	NaN	26.5565	25.2425	NaN	NaN	NaN
P52758	Ribonuclease UK114	HRSP12	NaN	NaN	NaN	24.0002	NaN	NaN	NaN	NaN	NaN	NaN	NaN	NaN	NaN	NaN	NaN	NaN	NaN	NaN	NaN	NaN	NaN	NaN	NaN	NaN	NaN	NaN	NaN	NaN	NaN	NaN	NaN	NaN	NaN	NaN	NaN	NaN	NaN	NaN	NaN	NaN	NaN	NaN	NaN	NaN	NaN	NaN	NaN
O14792	Heparan sulfate glucosamine 3-O-sulfotransferase 1	HS3ST1	NaN	NaN	24.6821	NaN	24.391	25.5061	24.5515	NaN	NaN	24.7649	24.1013	NaN	NaN	NaN	NaN	24.6181	NaN	NaN	25.4972	NaN	NaN	25.5382	24.5265	25.432	NaN	NaN	25.7073	25.0192	23.8064	25.4934	NaN	NaN	23.6094	NaN	NaN	NaN	23.868	25.4695	24.3346	NaN	NaN	NaN	NaN	NaN	26.2215	25.0536	25.2492
Q9Y662;Q9Y663	Heparan sulfate glucosamine 3-O-sulfotransferase 3B1;Heparan sulfate glucosamine 3-O-sulfotransferase 3A1	HS3ST3B1;HS3ST3A1	23.0579	NaN	24.316	NaN	24.0502	24.401	NaN	NaN	NaN	NaN	NaN	NaN	NaN	NaN	NaN	NaN	NaN	NaN	NaN	NaN	NaN	NaN	NaN	NaN	26.0634	25.3538	NaN	NaN	NaN	NaN	NaN	NaN	NaN	NaN	NaN	NaN	NaN	NaN	NaN	NaN	NaN	NaN	NaN	NaN	27.1264	26.7361	NaN
Q8IZP7	Heparan-sulfate 6-O-sulfotransferase 3	HS6ST3	NaN	NaN	NaN	NaN	NaN	NaN	NaN	NaN	NaN	NaN	NaN	NaN	NaN	NaN	NaN	NaN	NaN	NaN	25.2945	NaN	NaN	26.1605	NaN	NaN	NaN	NaN	NaN	NaN	NaN	NaN	NaN	NaN	NaN	NaN	NaN	NaN	NaN	NaN	NaN	NaN	NaN	NaN	NaN	NaN	NaN	NaN	NaN
Q99714	3-hydroxyacyl-CoA dehydrogenase type-2	HSD17B10	26.4076	25.9644	NaN	26.4589	23.3644	NaN	NaN	NaN	NaN	NaN	NaN	NaN	24.3036	NaN	NaN	NaN	NaN	NaN	NaN	NaN	NaN	NaN	NaN	NaN	NaN	NaN	NaN	NaN	NaN	NaN	NaN	NaN	NaN	25.6886	NaN	NaN	NaN	NaN	NaN	NaN	NaN	NaN	NaN	NaN	NaN	NaN	NaN
Q53GQ0	Very-long-chain 3-oxoacyl-CoA reductase	HSD17B12	23.9386	NaN	NaN	NaN	NaN	NaN	NaN	NaN	NaN	NaN	NaN	NaN	NaN	NaN	NaN	NaN	NaN	NaN	NaN	NaN	NaN	NaN	24.4539	NaN	NaN	NaN	NaN	NaN	NaN	NaN	NaN	NaN	NaN	NaN	NaN	NaN	NaN	NaN	NaN	NaN	NaN	NaN	NaN	NaN	NaN	NaN	NaN
P51659	Peroxisomal multifunctional enzyme type 2;(3R)-hydroxyacyl-CoA dehydrogenase;Enoyl-CoA hydratase 2	HSD17B4	26.1933	25.8688	NaN	25.192	NaN	NaN	NaN	NaN	NaN	NaN	NaN	NaN	NaN	NaN	NaN	NaN	NaN	NaN	NaN	NaN	NaN	NaN	NaN	NaN	NaN	NaN	NaN	NaN	NaN	NaN	NaN	NaN	NaN	NaN	NaN	24.4922	NaN	NaN	NaN	NaN	NaN	NaN	NaN	NaN	NaN	NaN	NaN
Q6YN16	Hydroxysteroid dehydrogenase-like protein 2	HSDL2	26.9246	24.8662	NaN	26.1563	NaN	NaN	NaN	NaN	NaN	NaN	NaN	NaN	NaN	NaN	NaN	NaN	NaN	NaN	NaN	NaN	NaN	NaN	NaN	NaN	NaN	NaN	NaN	NaN	NaN	NaN	NaN	NaN	NaN	NaN	NaN	NaN	NaN	NaN	NaN	NaN	NaN	NaN	NaN	NaN	NaN	NaN	NaN
P07900	Heat shock protein HSP 90-alpha	HSP90AA1	31.7063	31.9146	30.1109	31.7536	27.381	28.7279	25.6739	28.7832	27.6391	27.3845	26.1136	28.9871	29.7901	29.8156	30.0479	29.2006	28.6568	29.2507	29.108	28.8848	28.3146	29.3453	31.0155	29.4189	30.1397	29.4826	28.2409	26.1917	26.9539	27.2148	28.5676	28.1865	26.9707	30.4699	29.5596	29.2936	30.5469	29.2561	29.4712	28.6201	28.6344	28.7239	28.9476	28.467	30.2175	30.3729	29.8609
P08238	Heat shock protein HSP 90-beta	HSP90AB1	29.8417	30.1867	28.5382	30.0778	26.2809	26.7869	24.125	26.3466	25.761	24.9423	25.2934	26.4679	27.4253	26.614	26.3853	26.823	25.9223	26.0204	NaN	NaN	27.1752	26.9739	28.5423	27.6944	28.3974	27.642	25.4403	26.6077	23.9936	24.7634	27.2146	25.4911	24.183	27.228	27.4398	26.0969	27.0699	25.9074	NaN	25.8738	NaN	26.9285	26.7768	26.066	28.0525	27.7759	27.7672
Q58FF8	Putative heat shock protein HSP 90-beta 2	HSP90AB2P	NaN	25.1661	NaN	NaN	NaN	NaN	NaN	NaN	NaN	NaN	NaN	NaN	NaN	NaN	NaN	NaN	NaN	NaN	NaN	NaN	NaN	NaN	24.3227	NaN	NaN	NaN	NaN	NaN	NaN	NaN	NaN	NaN	NaN	NaN	NaN	NaN	NaN	NaN	NaN	NaN	NaN	NaN	NaN	NaN	NaN	NaN	NaN
P14625	Endoplasmin	HSP90B1	31.7186	31.7377	29.5281	31.6098	28.9362	29.4691	28.4411	28.7478	28.2757	29.0334	27.9879	29.6028	30.3539	30.3344	30.4207	28.8981	29.7465	29.3855	28.9785	29.1881	29.7792	29.7334	30.902	29.5298	29.6384	29.8738	29.6151	29.6234	28.6771	28.2441	28.6516	29.08	28.621	30.2942	29.5113	29.0817	30.0874	29.4039	29.6858	28.9784	28.7477	27.7304	29.0172	28.7112	30.6339	30.2848	30.2385
O43301;Q96MM6	Heat shock 70 kDa protein 12A;Heat shock 70 kDa protein 12B	HSPA12A;HSPA12B	22.2065	22.1655	NaN	NaN	NaN	NaN	NaN	NaN	NaN	NaN	NaN	NaN	NaN	NaN	NaN	NaN	NaN	NaN	NaN	NaN	NaN	NaN	NaN	NaN	NaN	NaN	NaN	NaN	NaN	NaN	NaN	NaN	NaN	NaN	NaN	NaN	NaN	NaN	NaN	NaN	NaN	NaN	NaN	NaN	NaN	NaN	NaN
P48723	Heat shock 70 kDa protein 13	HSPA13	NaN	25.7237	NaN	25.9529	NaN	24.7019	23.675	NaN	NaN	NaN	NaN	NaN	NaN	NaN	NaN	25.0314	NaN	NaN	NaN	NaN	NaN	NaN	NaN	NaN	NaN	NaN	NaN	NaN	NaN	NaN	NaN	NaN	NaN	NaN	NaN	NaN	NaN	NaN	NaN	NaN	NaN	NaN	NaN	NaN	NaN	NaN	25.3349
P0DMV9;P0DMV8	Heat shock 70 kDa protein 1B;Heat shock 70 kDa protein 1A	HSPA1B;HSPA1A	32.7421	32.0951	29.6335	32.9062	28.3816	28.514	26.7774	26.048	26.1138	26.8219	26.0729	30.3868	30.8059	30.4441	29.9335	28.9933	28.5785	29.8414	29.6851	30.3574	29.0709	29.4222	31.1173	29.8704	30.1416	29.7556	27.8916	27.0818	24.9079	27.6492	28.1837	27.2312	26.3385	31.0844	30.1442	30.5483	31.2536	29.7215	29.5106	28.4633	29.1205	29.1653	29.3688	28.5822	30.4637	31.0058	29.8174
P34931	Heat shock 70 kDa protein 1-like	HSPA1L	NaN	NaN	NaN	NaN	NaN	NaN	NaN	NaN	NaN	NaN	NaN	NaN	NaN	NaN	NaN	NaN	NaN	NaN	NaN	NaN	NaN	NaN	NaN	NaN	NaN	NaN	NaN	NaN	NaN	NaN	NaN	NaN	NaN	NaN	NaN	NaN	NaN	NaN	NaN	NaN	NaN	NaN	NaN	NaN	NaN	NaN	NaN
P54652	Heat shock-related 70 kDa protein 2	HSPA2	28.7056	27.3597	NaN	28.7167	25.2542	26.0939	28.0942	NaN	NaN	NaN	NaN	28.2414	27.2151	NaN	NaN	28.5453	27.6422	28.669	NaN	NaN	NaN	27.8606	27.6885	NaN	27.1134	NaN	NaN	NaN	NaN	NaN	NaN	NaN	NaN	27.5512	26.6922	NaN	28.4235	NaN	NaN	NaN	25.594	NaN	27.1756	NaN	27.8799	NaN	27.7203
P34932	Heat shock 70 kDa protein 4	HSPA4	28.2599	28.2144	NaN	29.3861	NaN	NaN	25.2779	NaN	24.1621	25.6152	24.8021	NaN	23.8294	24.6083	24.2755	NaN	NaN	NaN	NaN	NaN	NaN	23.8909	25.2822	NaN	24.1305	NaN	24.5454	NaN	NaN	24.7935	NaN	NaN	NaN	NaN	NaN	NaN	25.4756	NaN	NaN	NaN	NaN	NaN	NaN	NaN	24.8808	22.9727	NaN
P11021	78 kDa glucose-regulated protein	HSPA5	31.2919	31.1288	29.2157	31.3638	28.605	29.0095	28.172	29.058	28.613	28.9673	27.829	28.9324	30.0045	30.1982	29.4948	29.2869	29.3086	29.8812	29.6551	29.5244	30.2572	29.6805	30.597	29.3908	29.597	29.2908	28.9563	29.1962	28.0316	28.8729	28.6528	28.5146	28.1157	30.2736	29.3548	29.7599	30.3954	29.8166	30.3974	30.2239	29.459	29.4623	29.846	29.5651	30.1874	30.2005	30.2921
P17066;P48741	Heat shock 70 kDa protein 6;Putative heat shock 70 kDa protein 7	HSPA6;HSPA7	NaN	NaN	NaN	NaN	NaN	NaN	NaN	NaN	NaN	NaN	NaN	NaN	NaN	NaN	NaN	NaN	NaN	NaN	NaN	NaN	NaN	NaN	NaN	NaN	NaN	NaN	NaN	NaN	NaN	NaN	NaN	NaN	NaN	NaN	NaN	NaN	NaN	NaN	NaN	NaN	NaN	NaN	NaN	NaN	NaN	29.4464	NaN
[truncated: 1,809 more rows]
[truncated: 30 more columns]

## Sheet: Sample information
Phenotypic information for the 66 sample profiles
No.	Profile names	Disc level	Age-group	Direction	Disc Compartments
[truncated: 66 more rows]
